# Supplementary material
Source: PubMed Central journal article supplement (PMC4762518)

**Supplemental Figure S1. MS/MS spectra of all identified phosphopeptides and phosphosites from *A. baumannii* strain SK17-S.** Annotated MS/MS spectra of all detected phosphopeptides were obtained and then exported after the database search. Data extraction and processing were done using MaxQuant. The y-ions are shown in red and the b-ions in blue. Losses of neutral chemical groups, H<sub>2</sub>O, or NH<sub>3</sub> from the fragment ions are shown in orange. Residues marked with “ph” are those favored for phosphorylation.

1

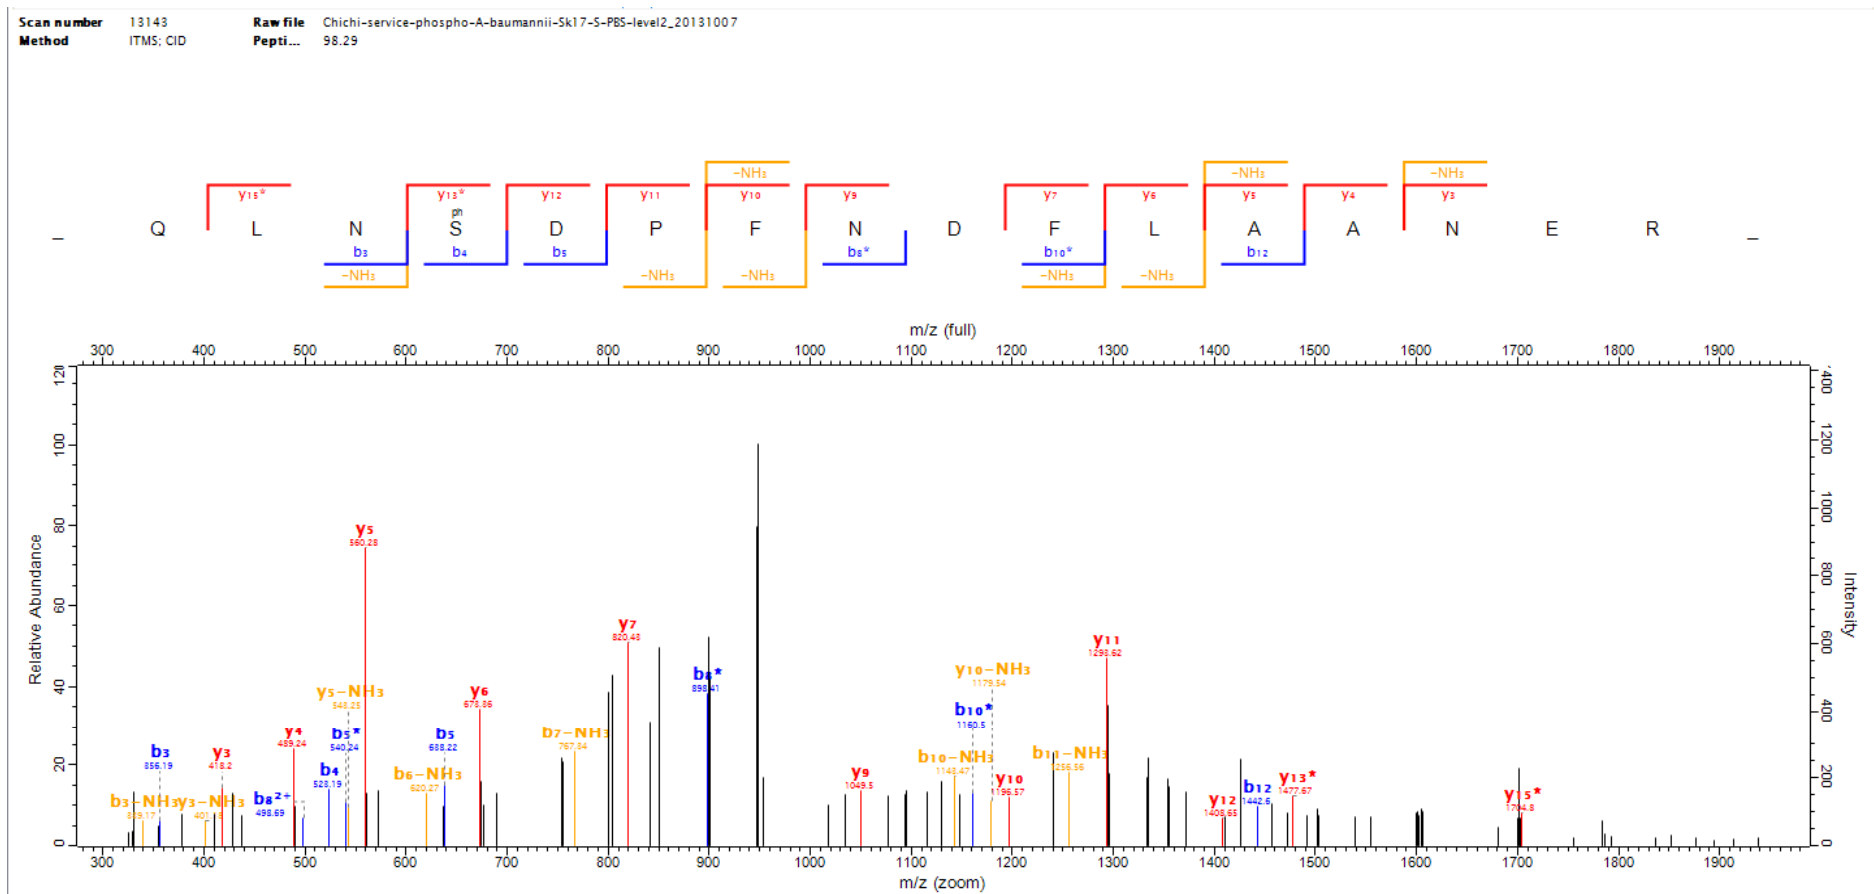

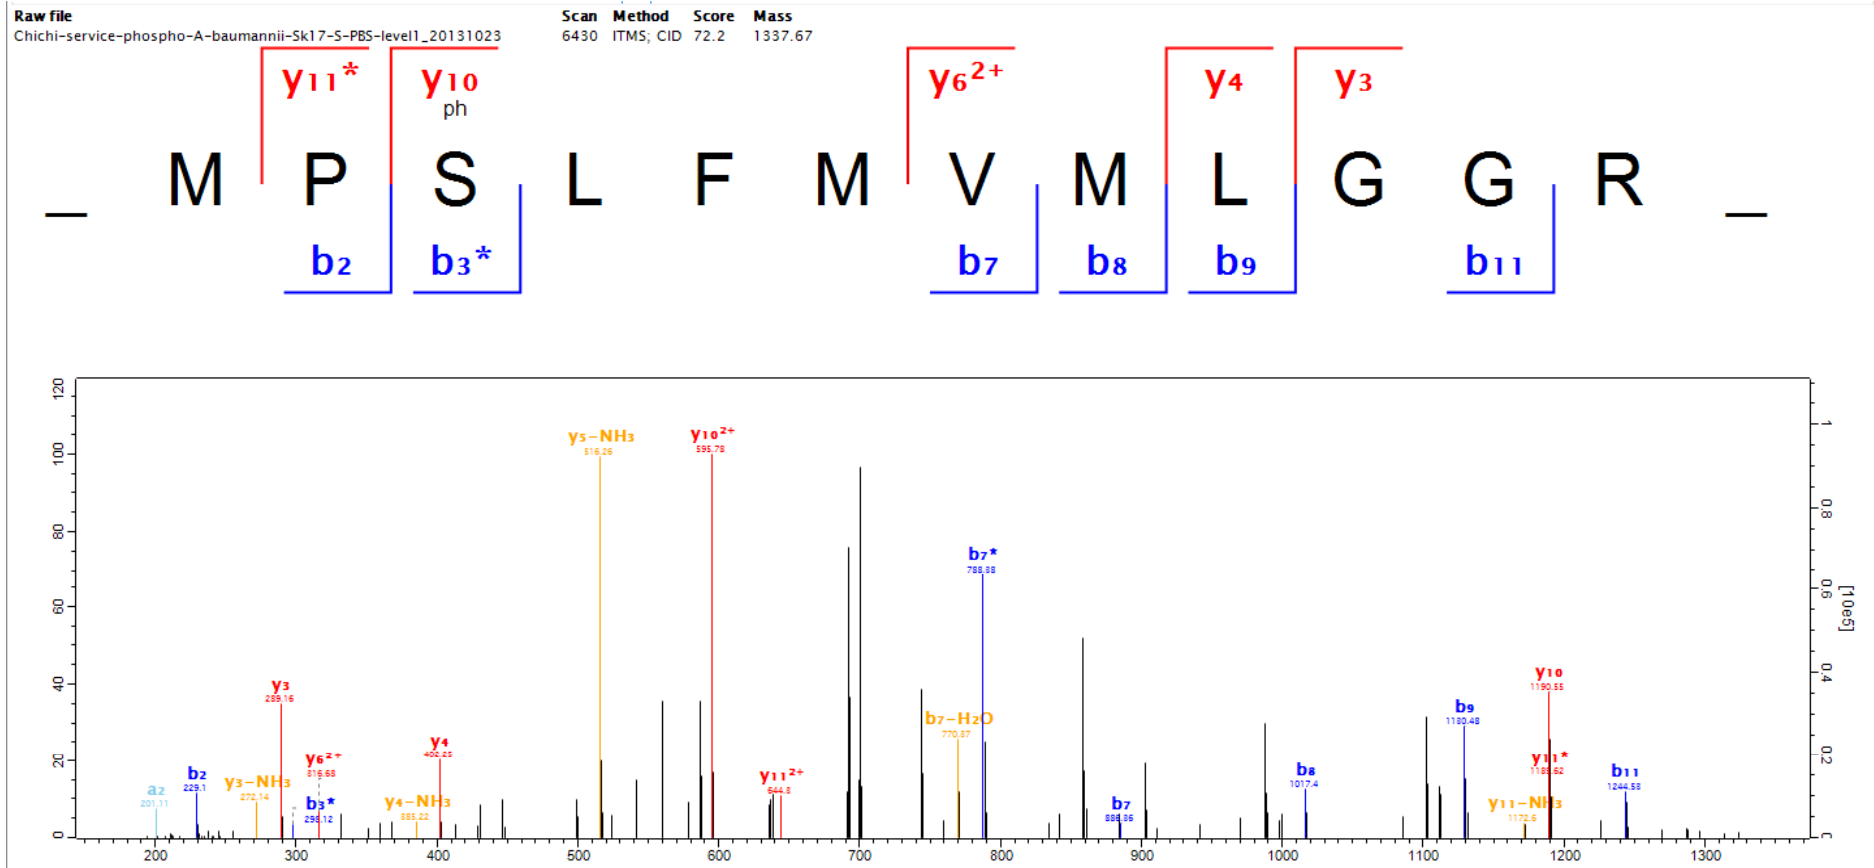



4-1

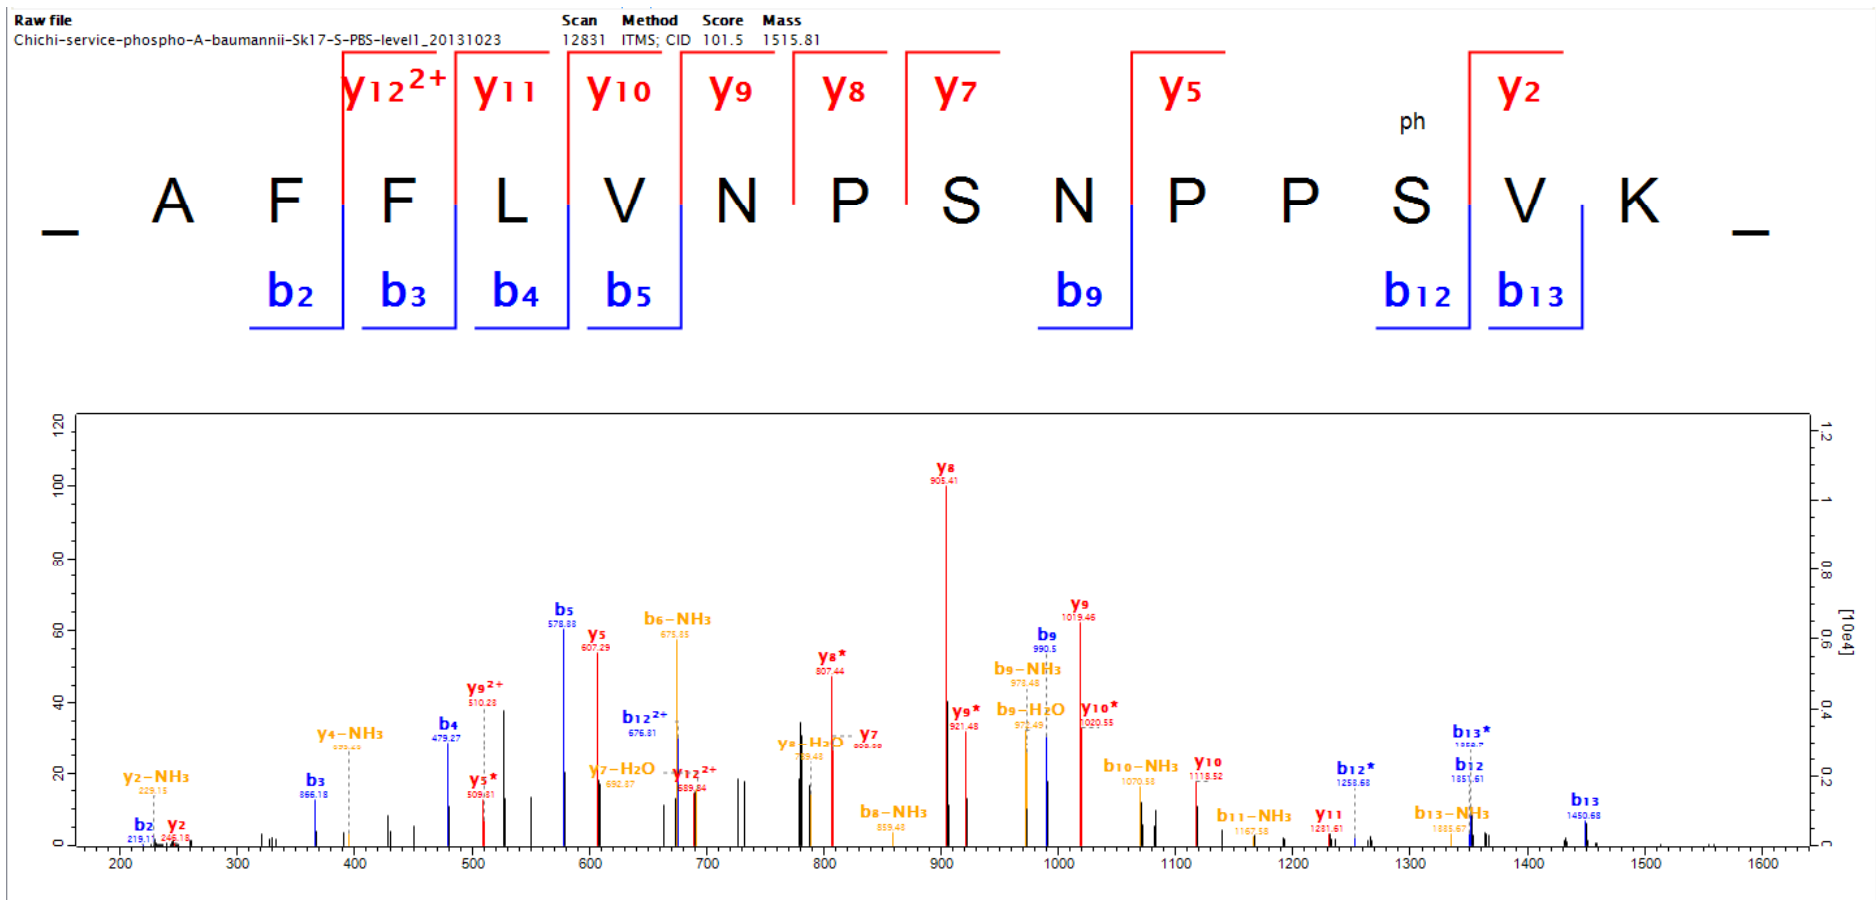

4-2

Scan number 12831 Raw file Chichi-service-phospho-A-baumannii-Sk17-5-PBS-level1\_20131023  
Method ITMS; CID Peptide 135.08

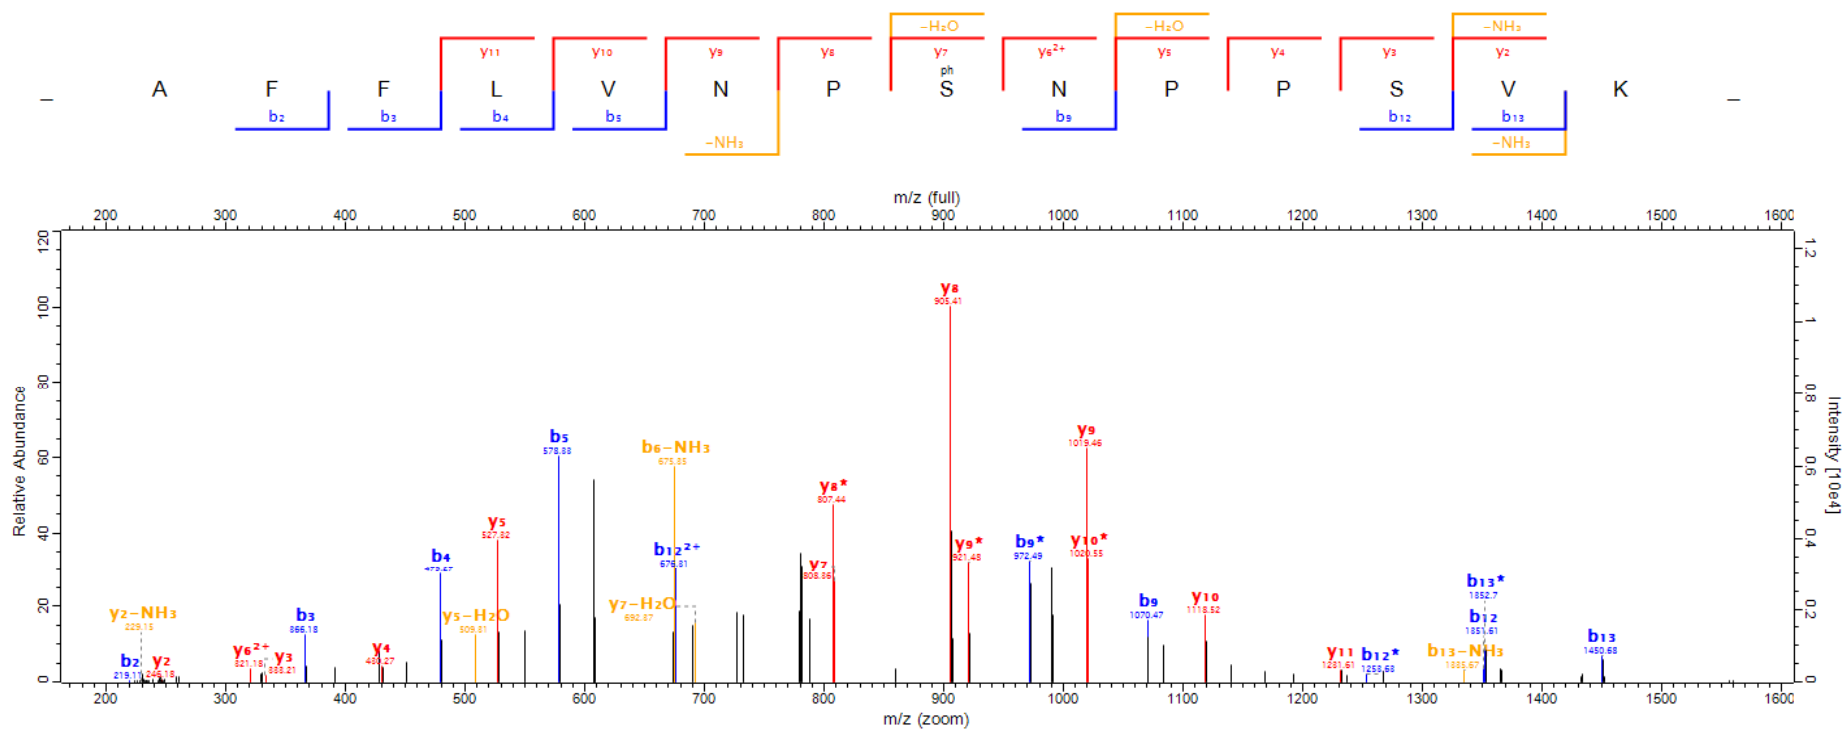

4-3

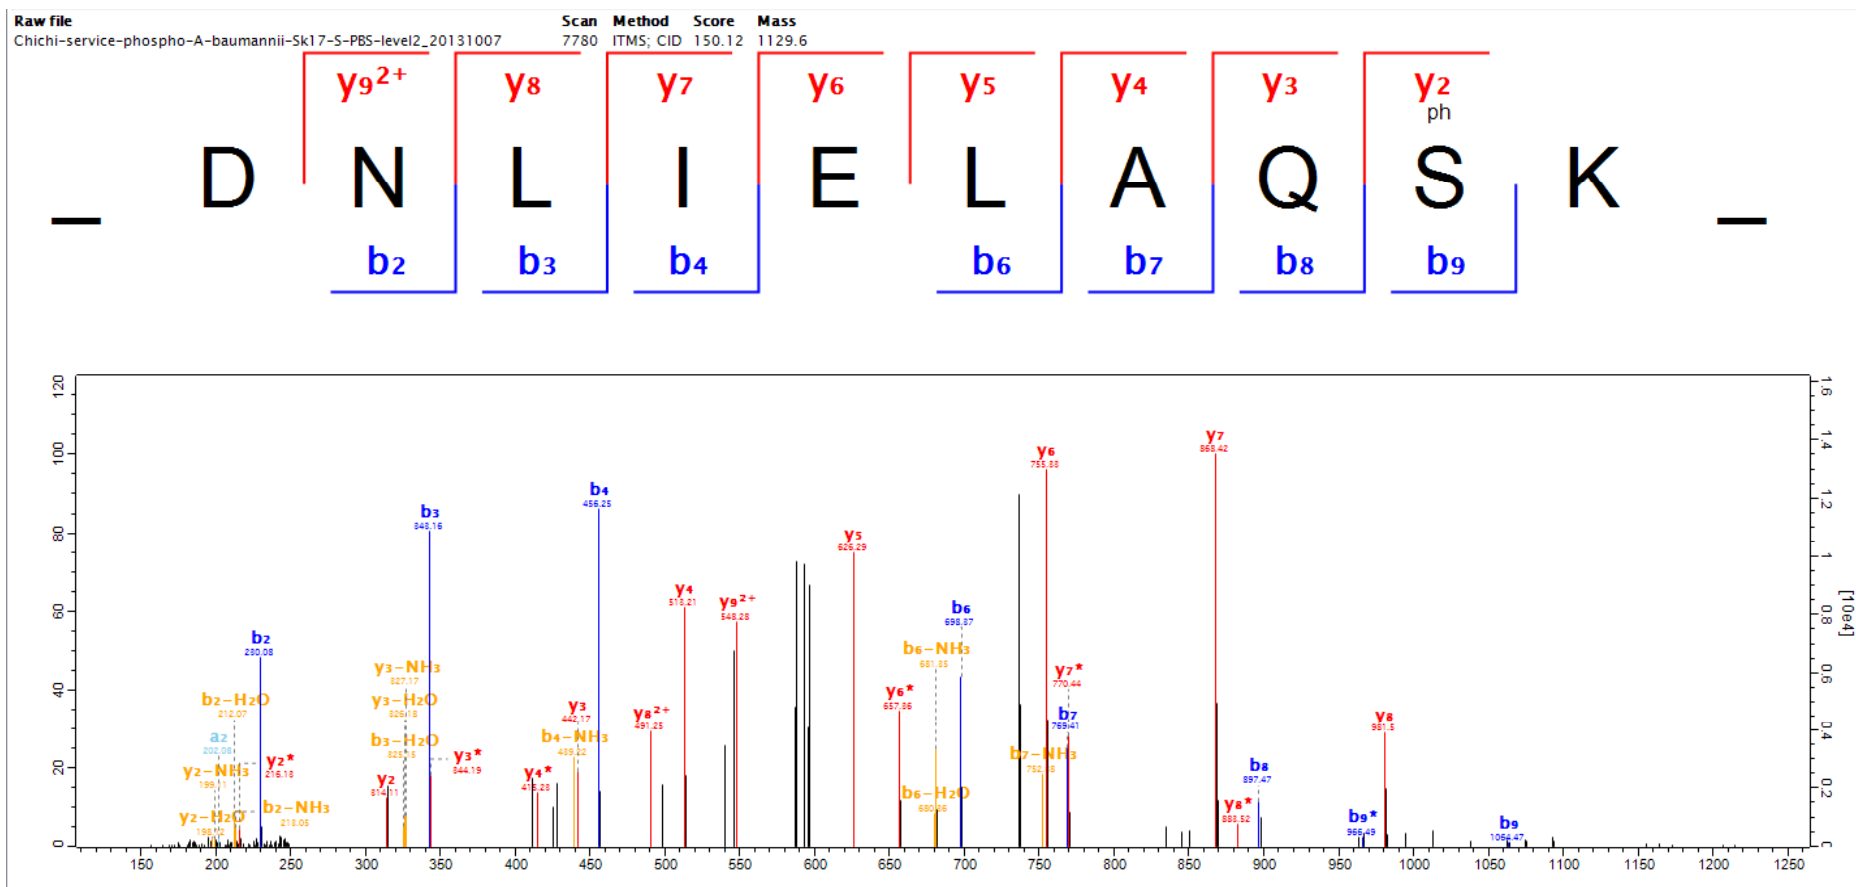

4-4

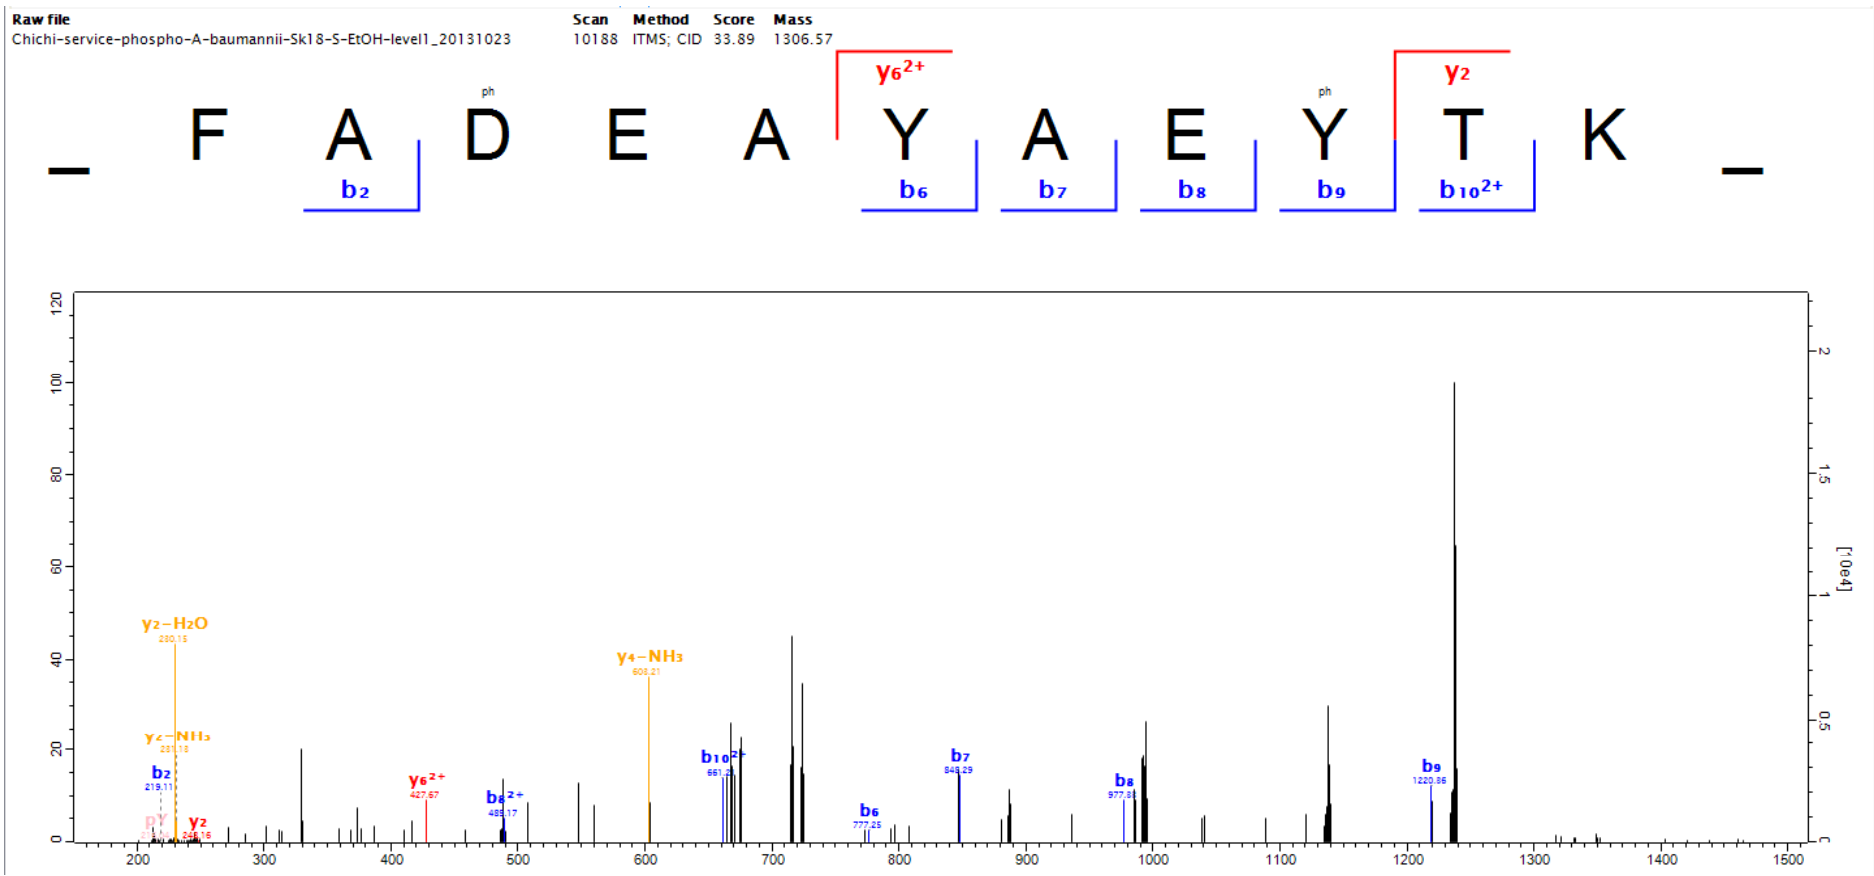

5-1

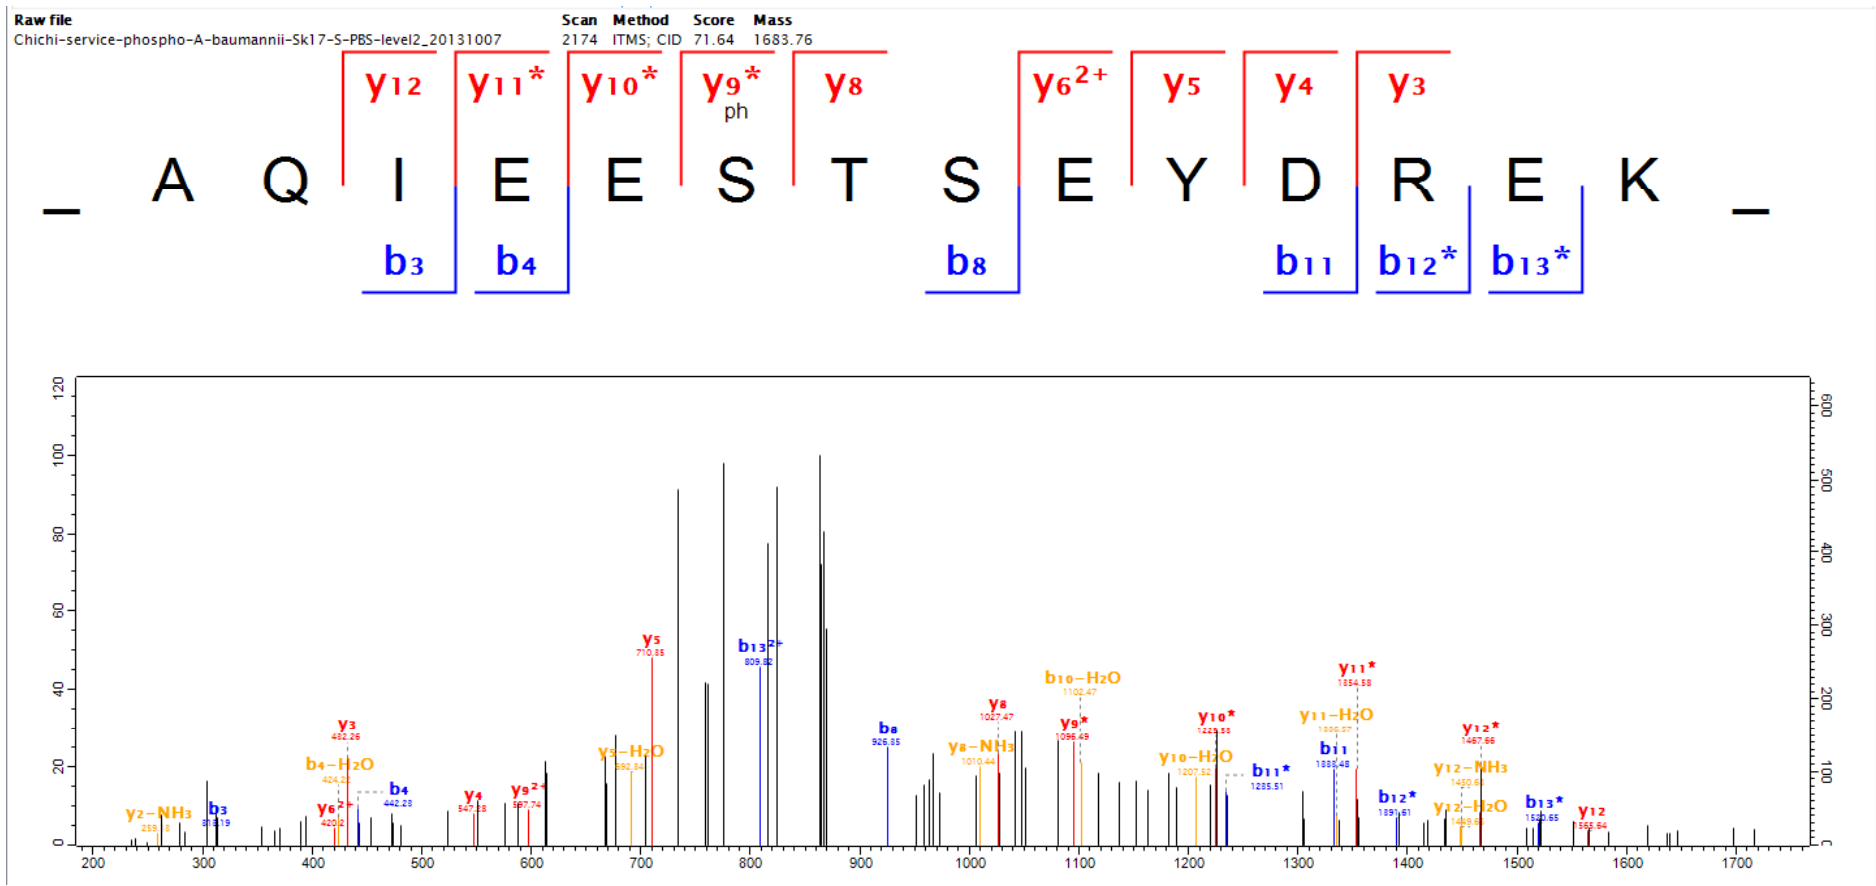



5-2

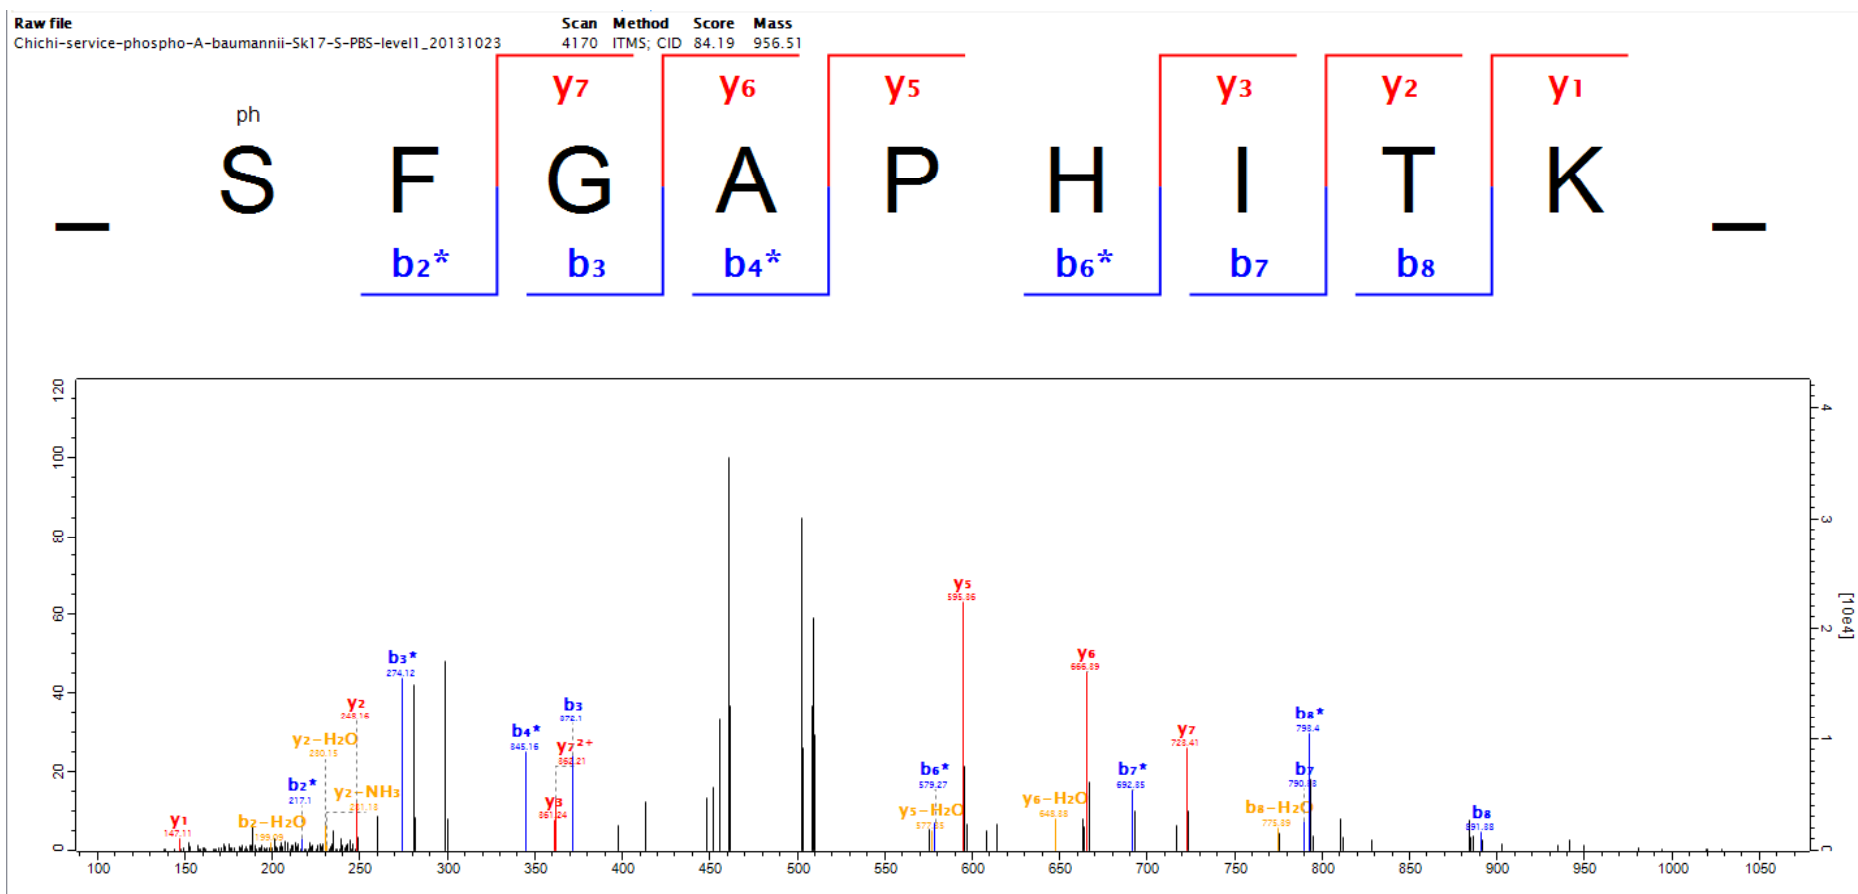

5-3

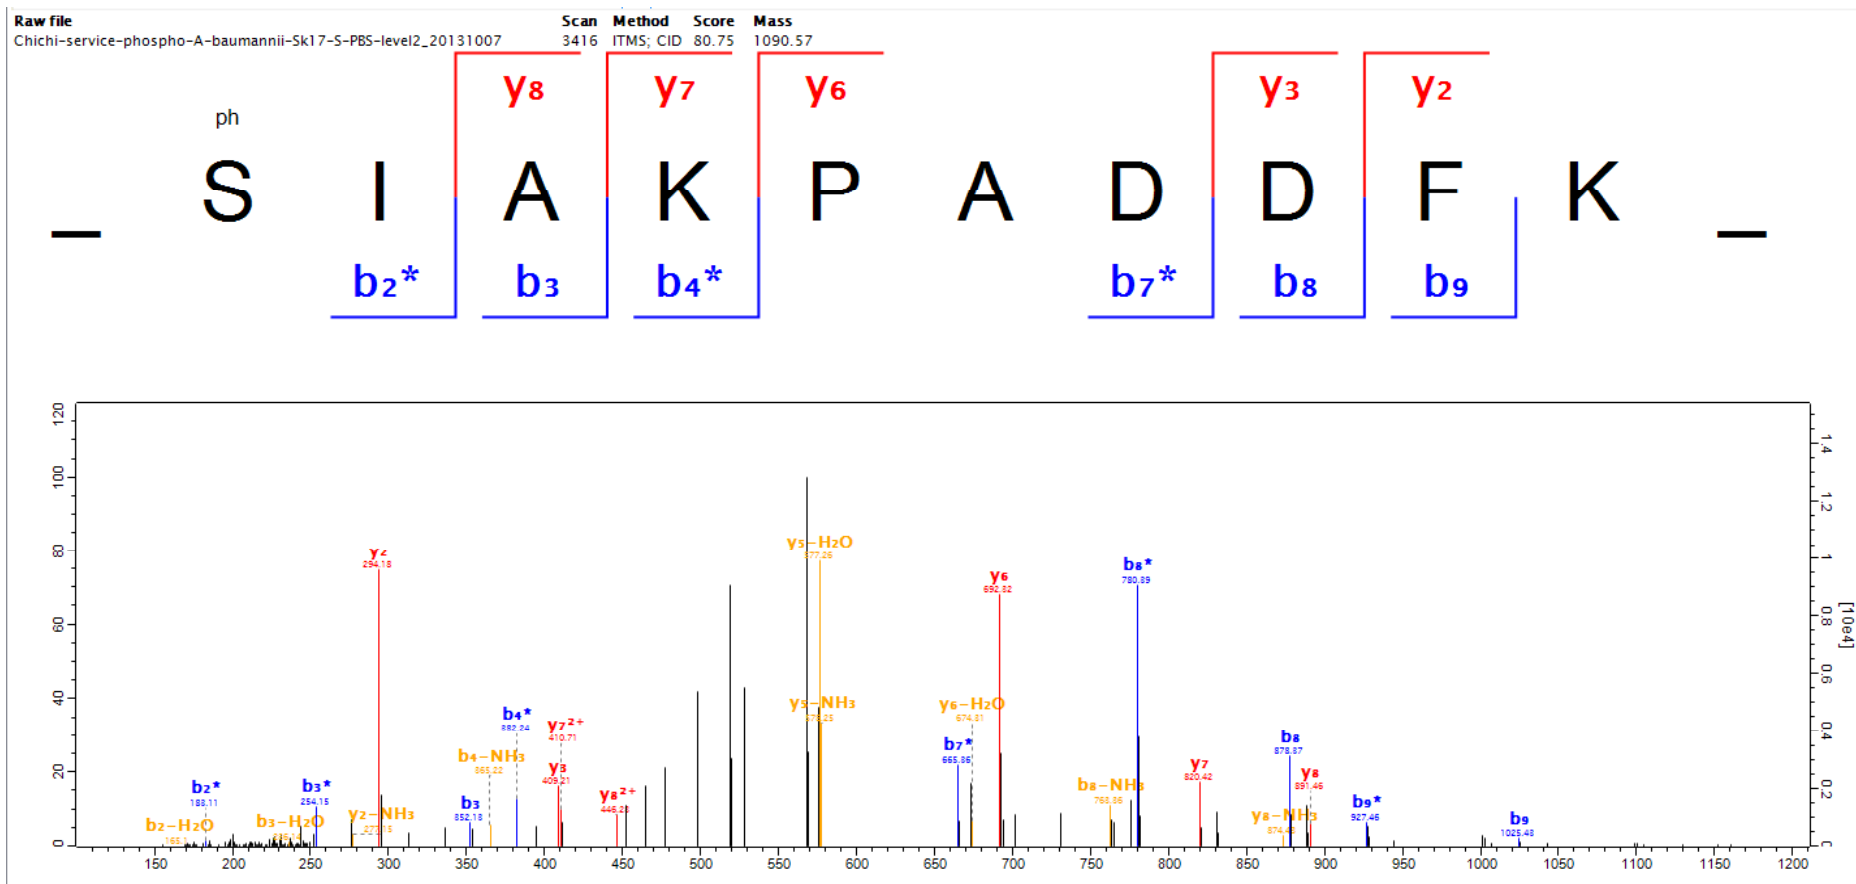

5-4

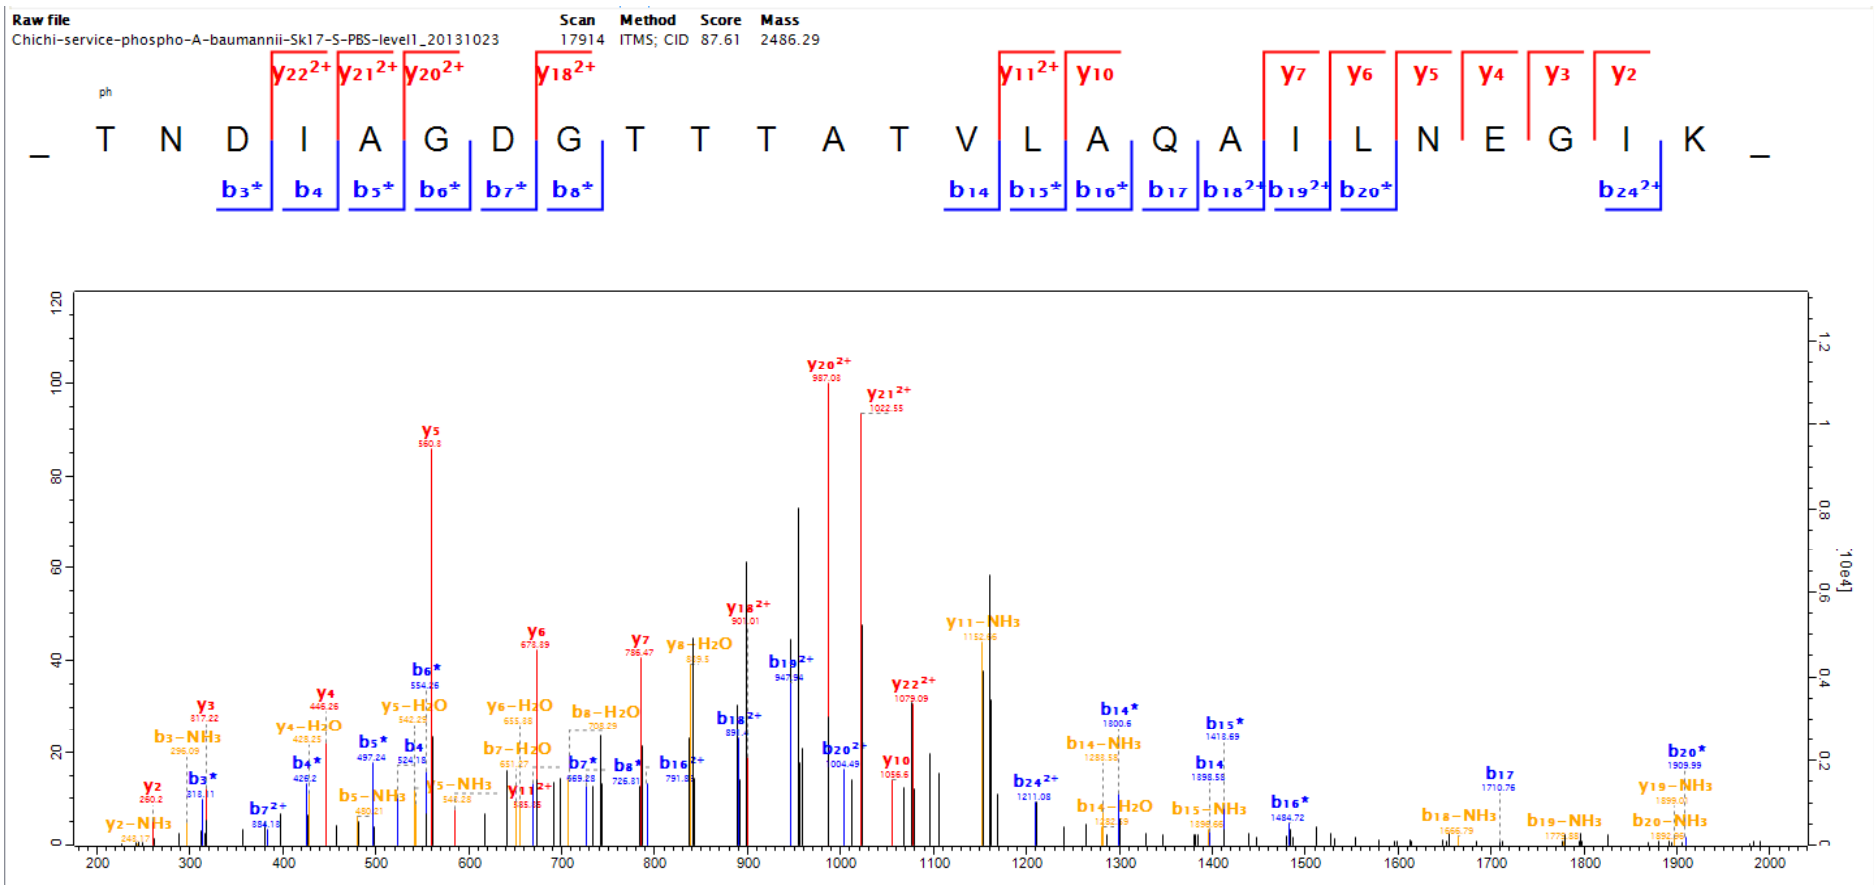

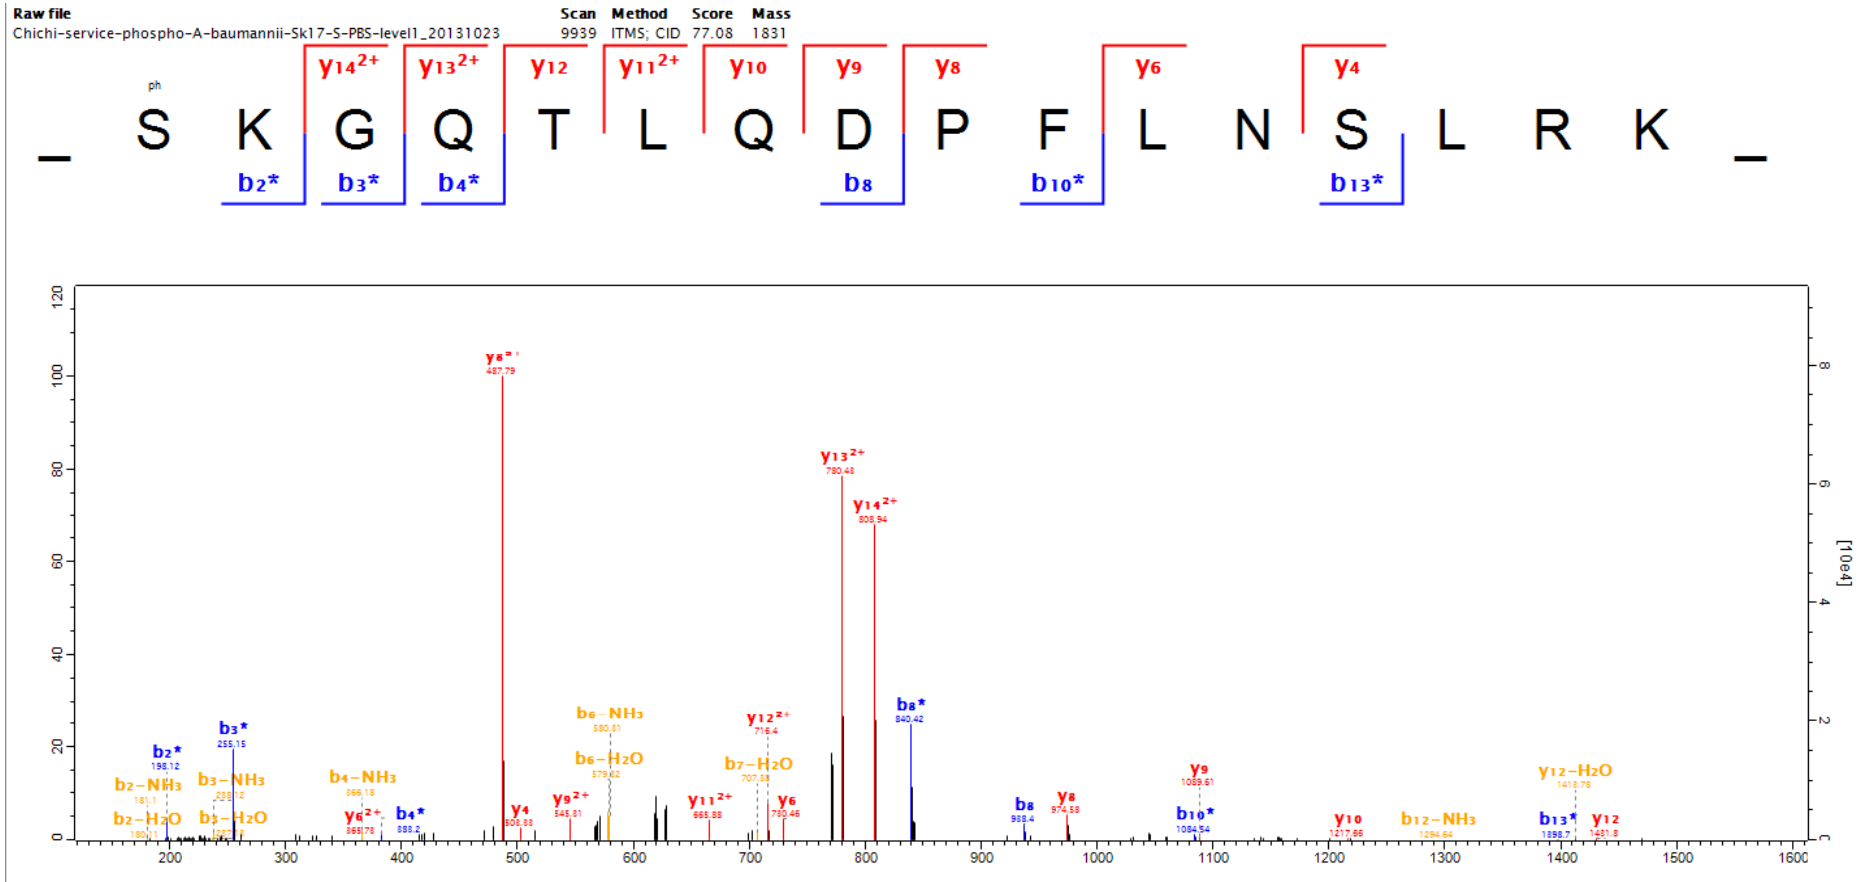

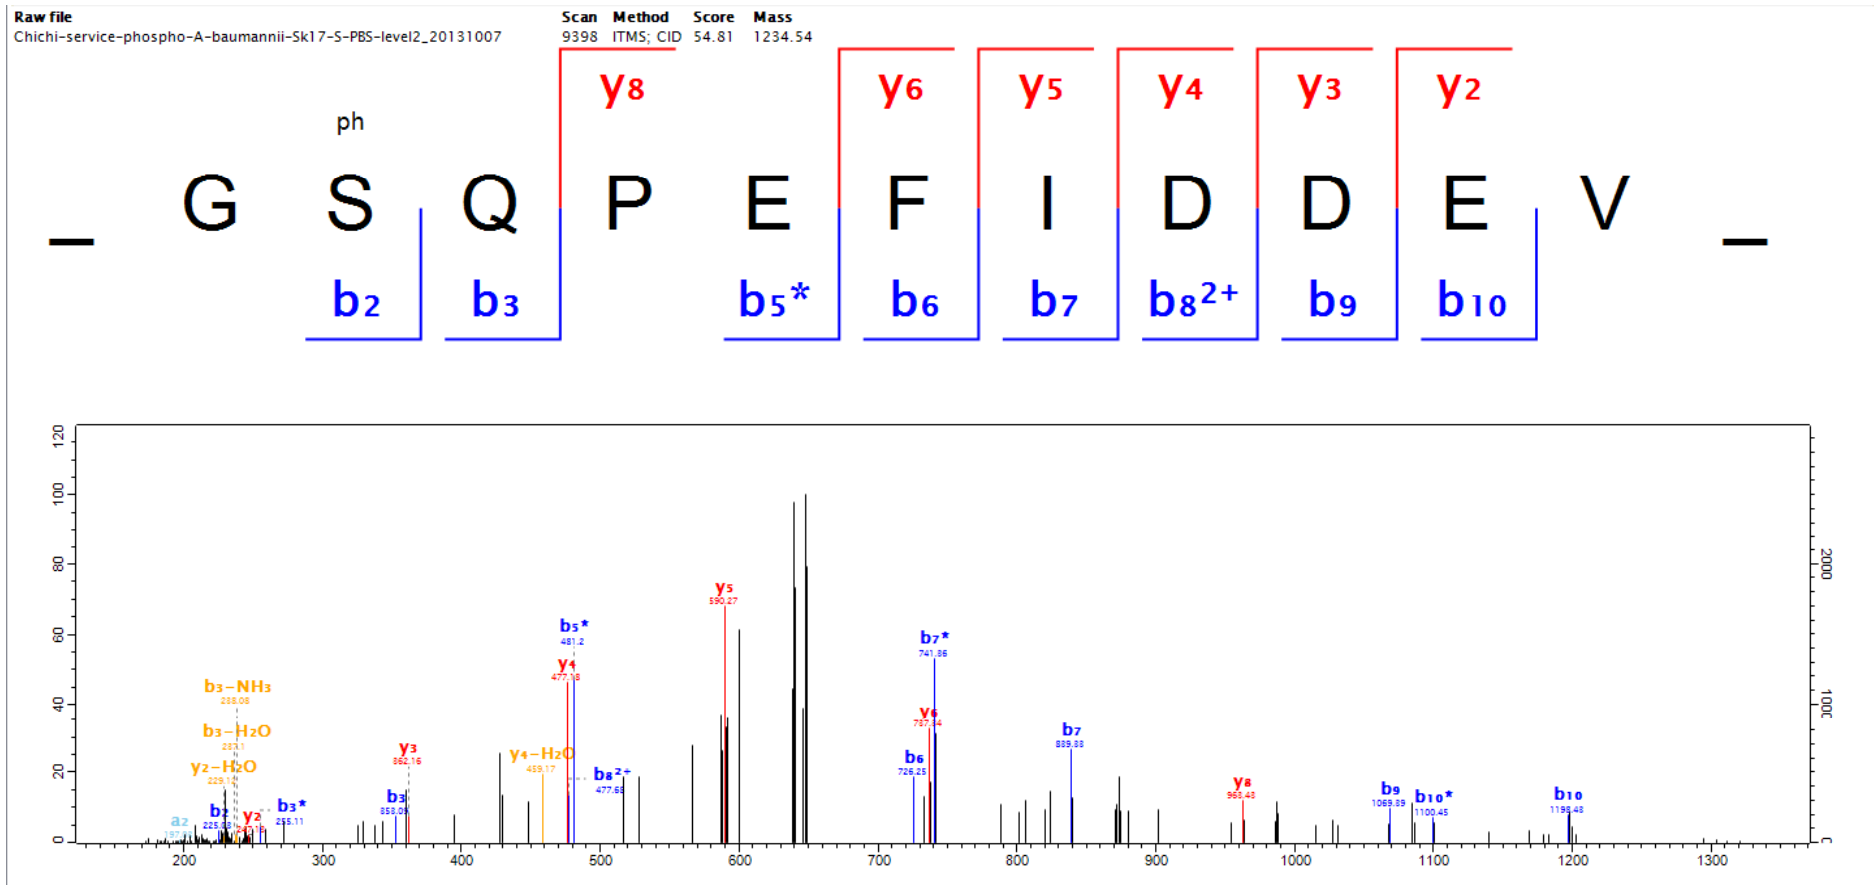

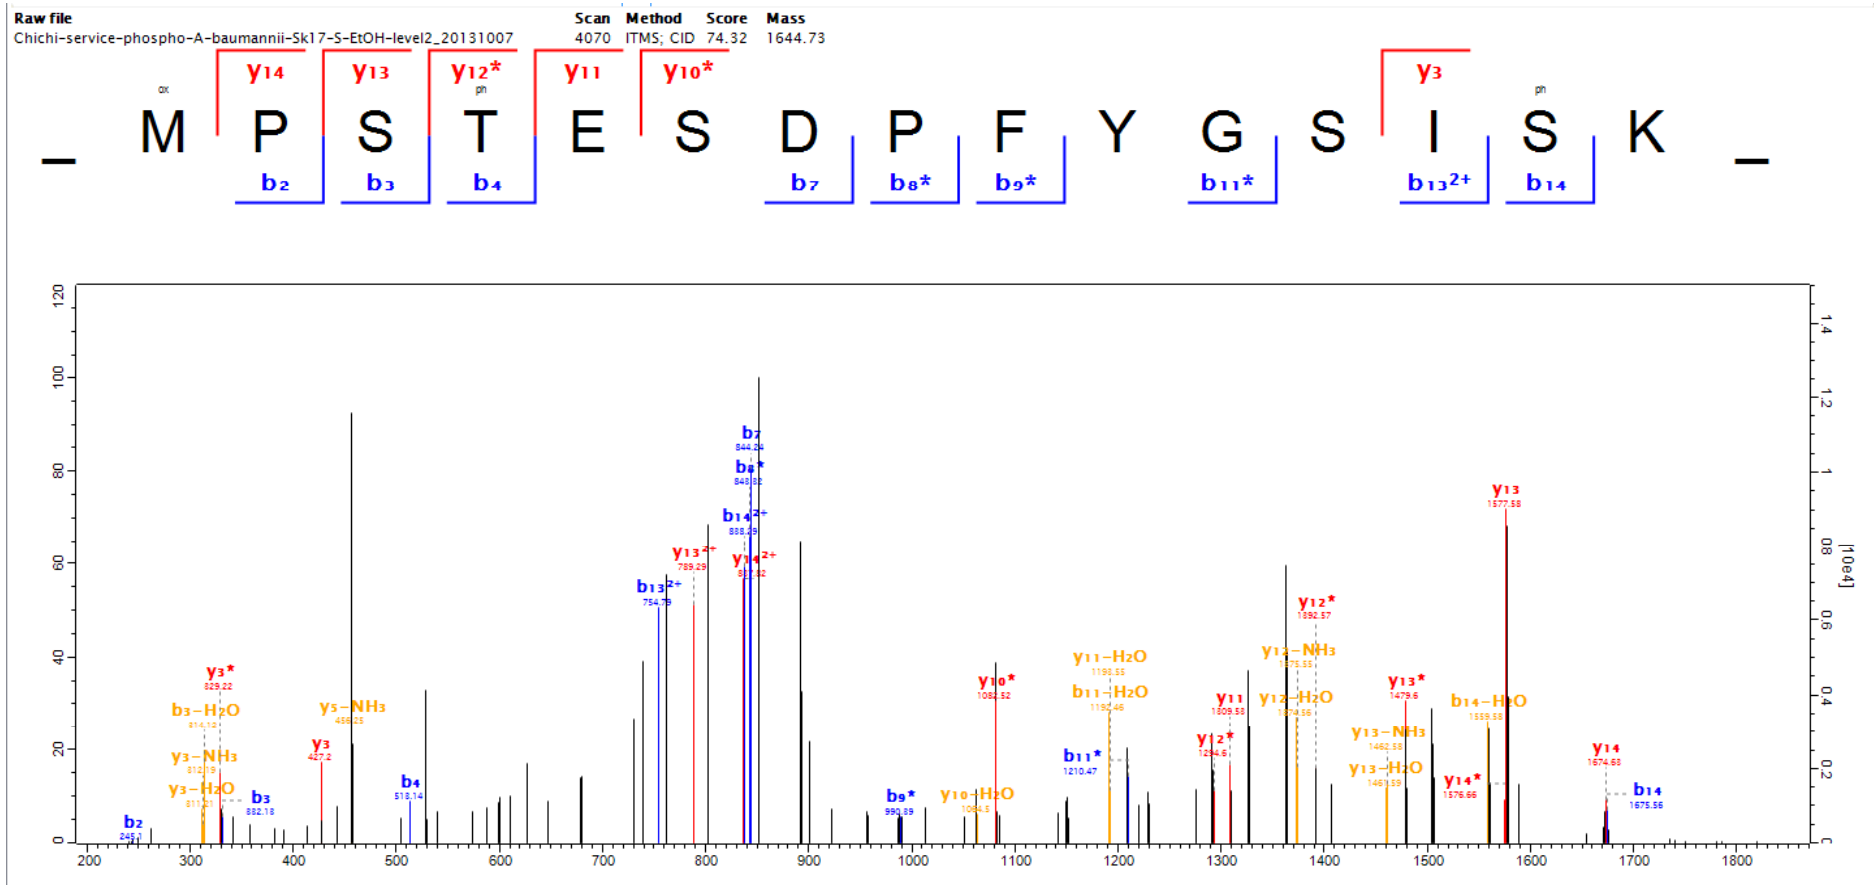

9-1

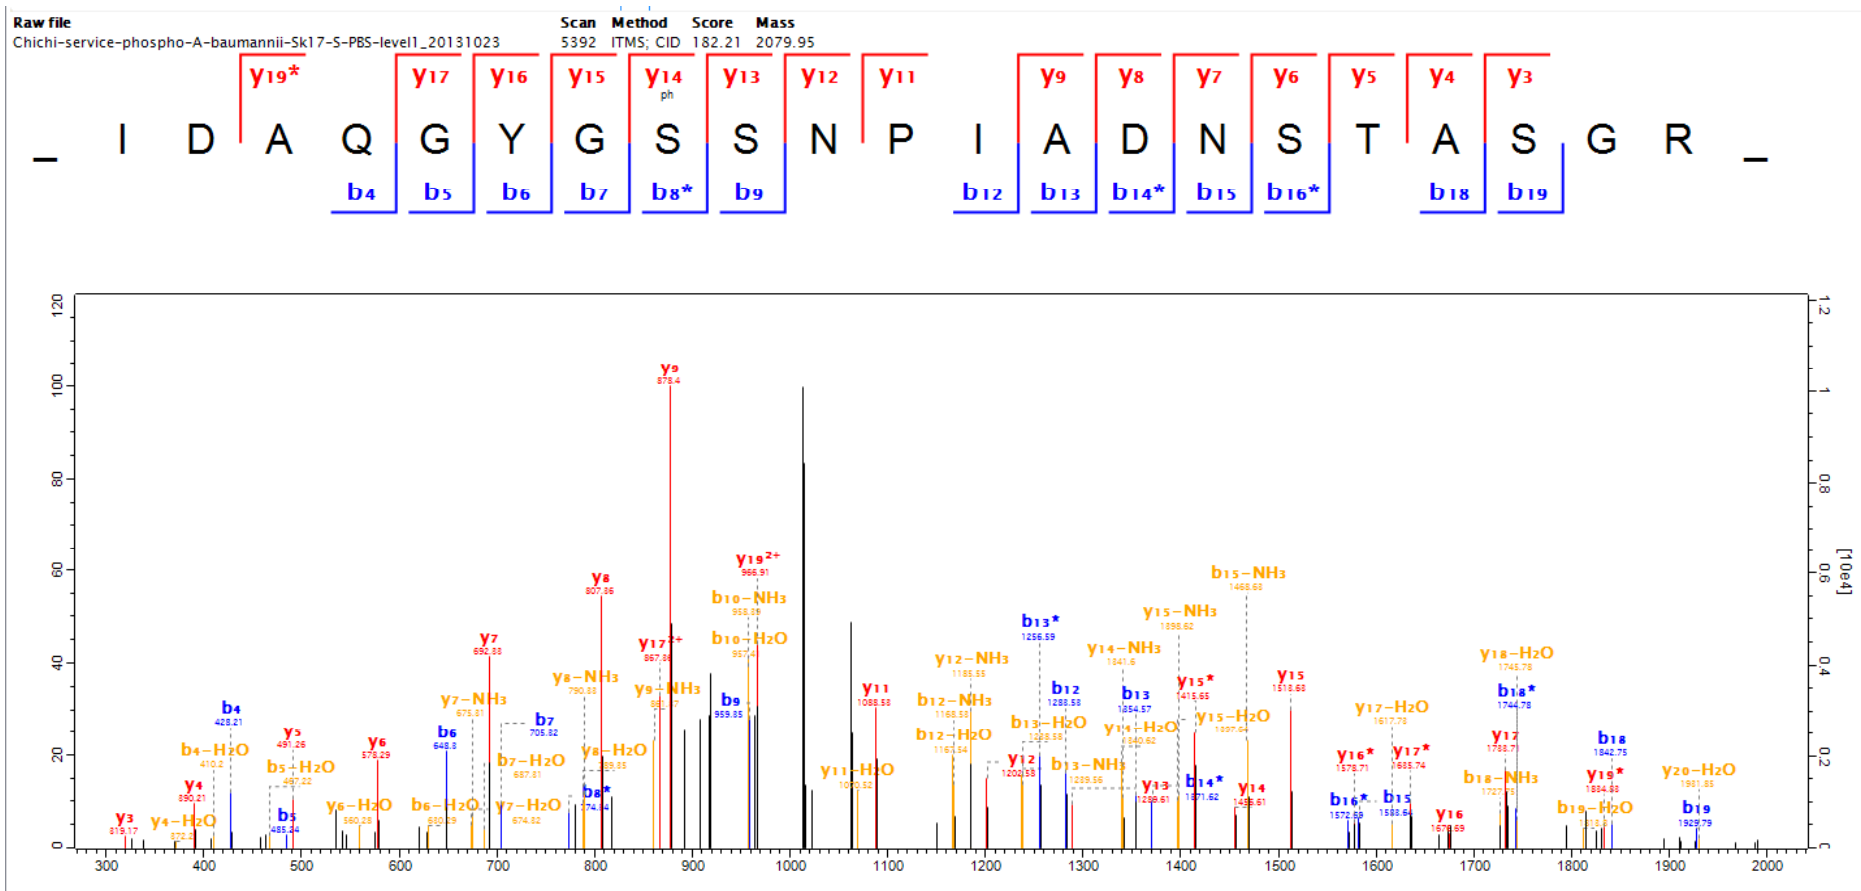

9-2

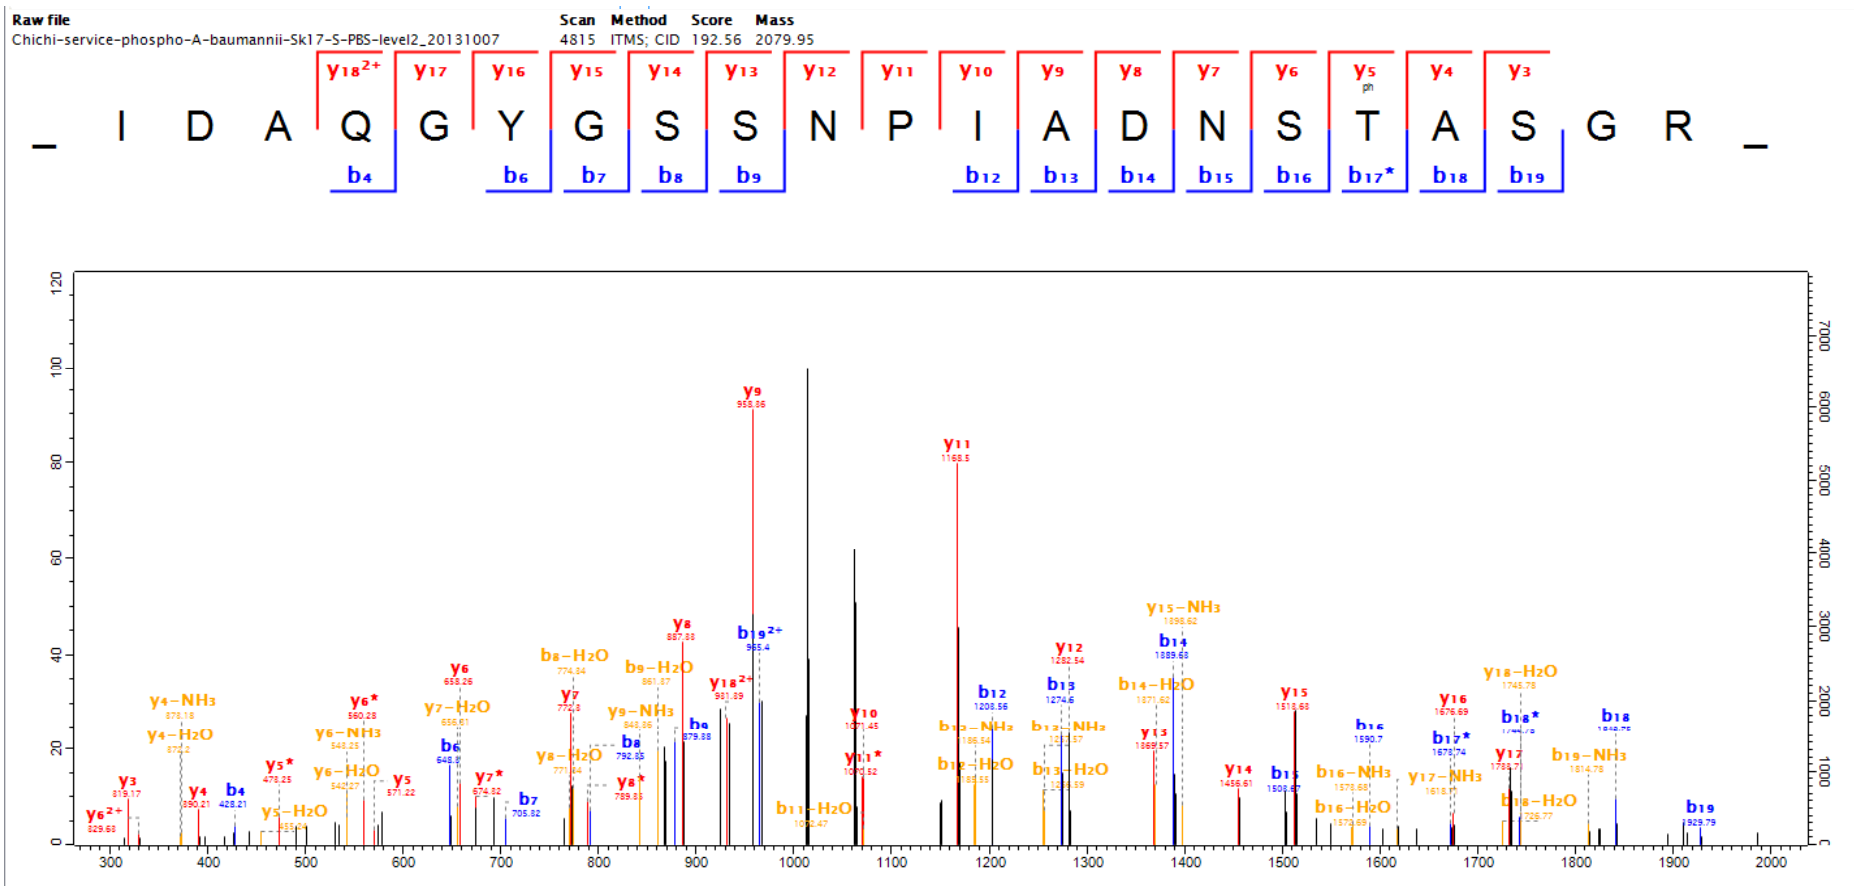



9-3

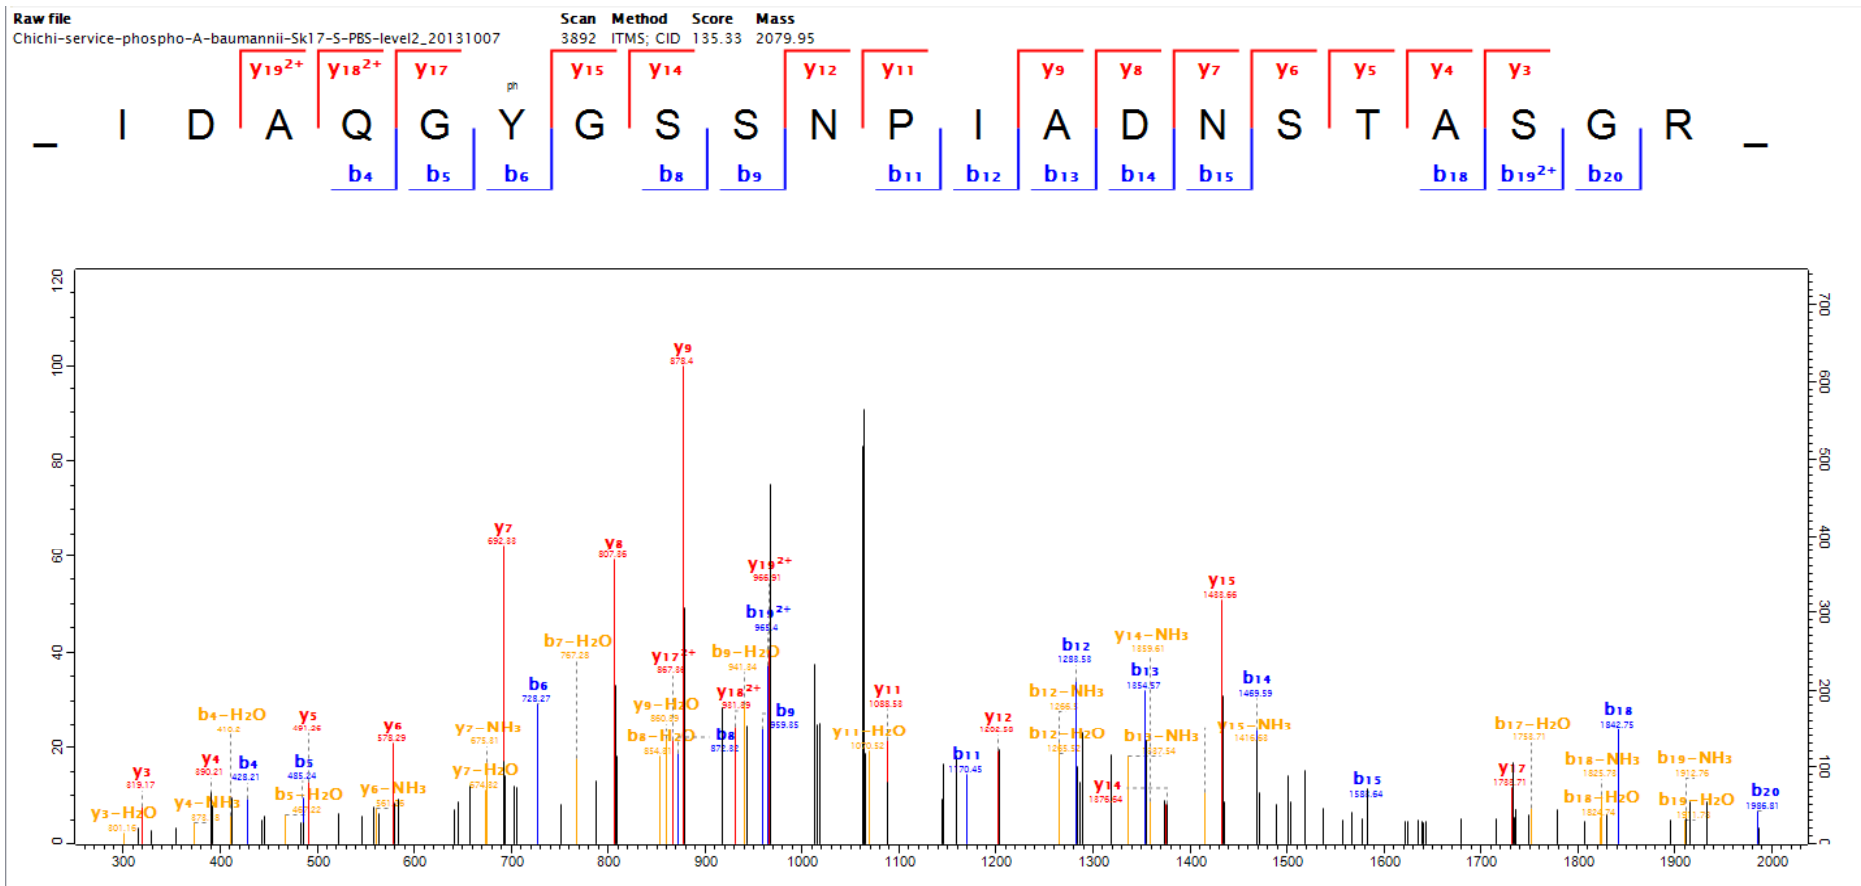

9-4

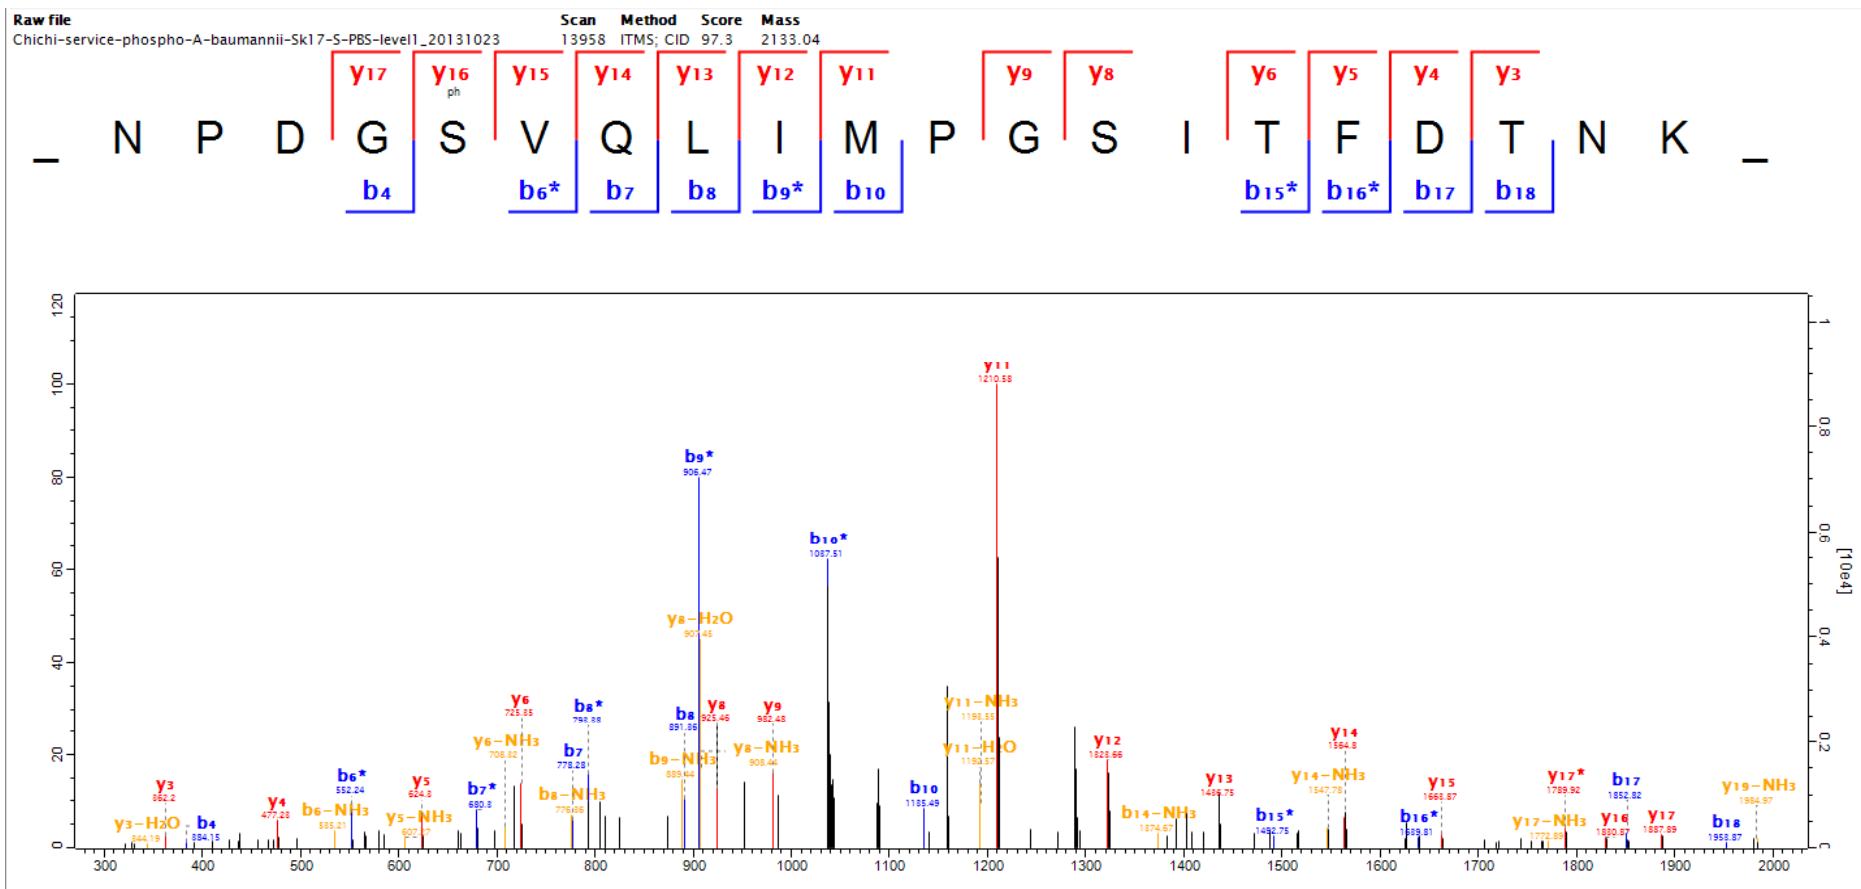

9-5

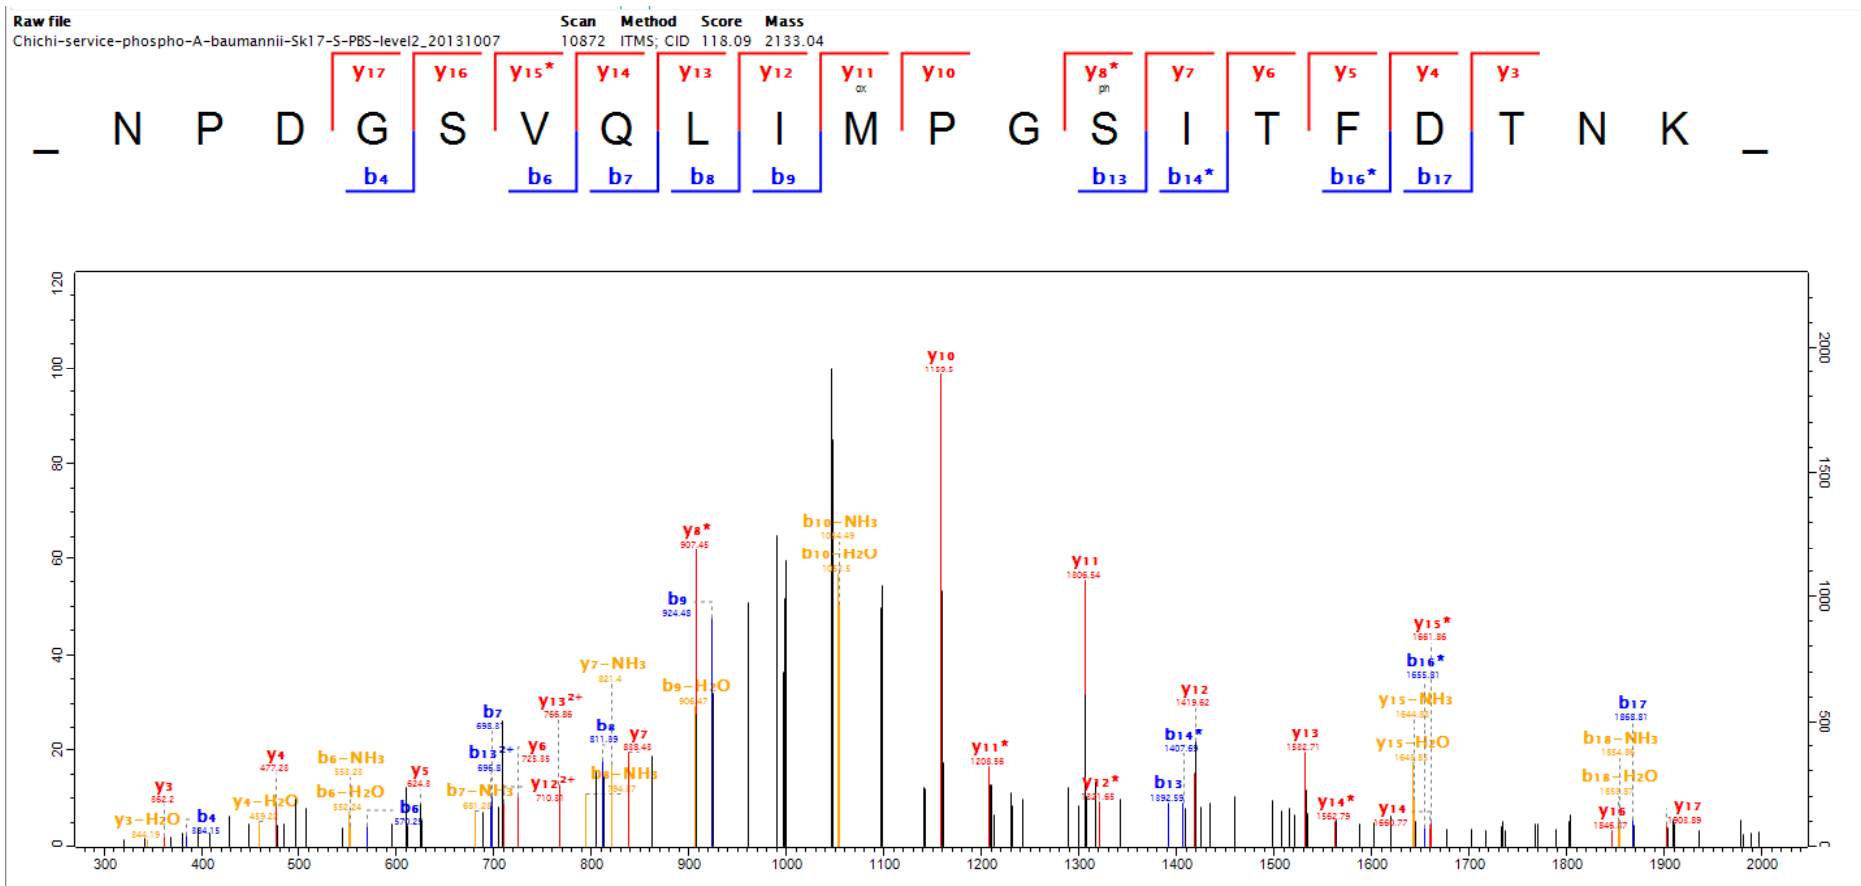

9-6

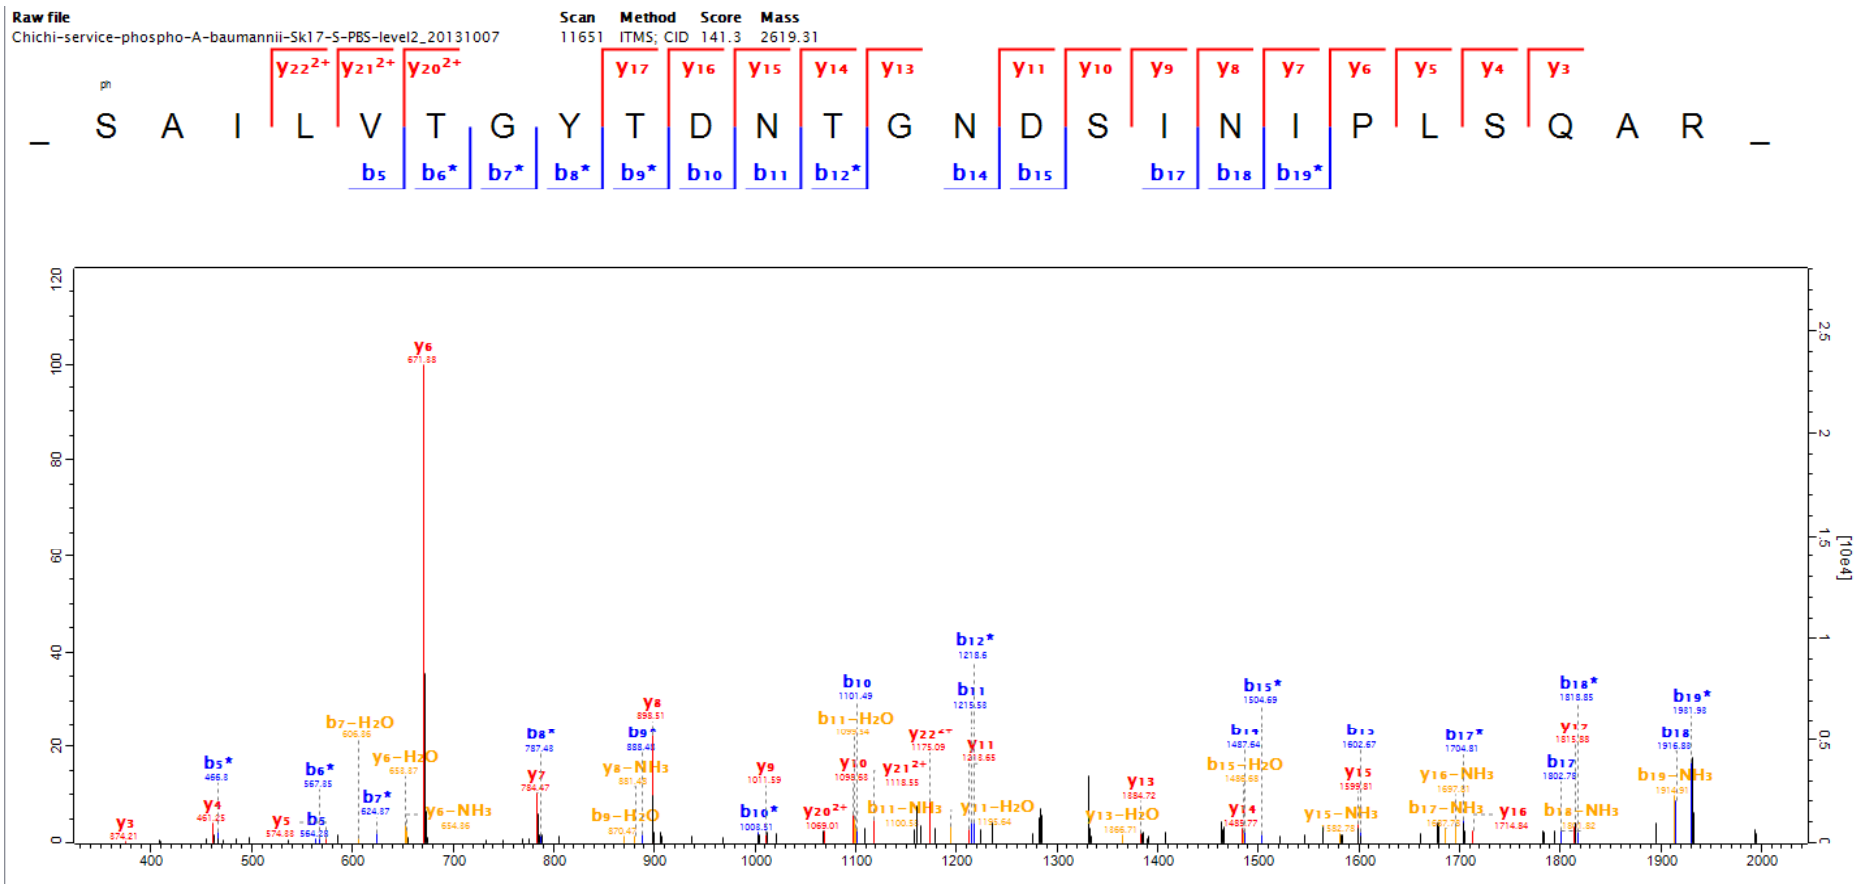

9-7

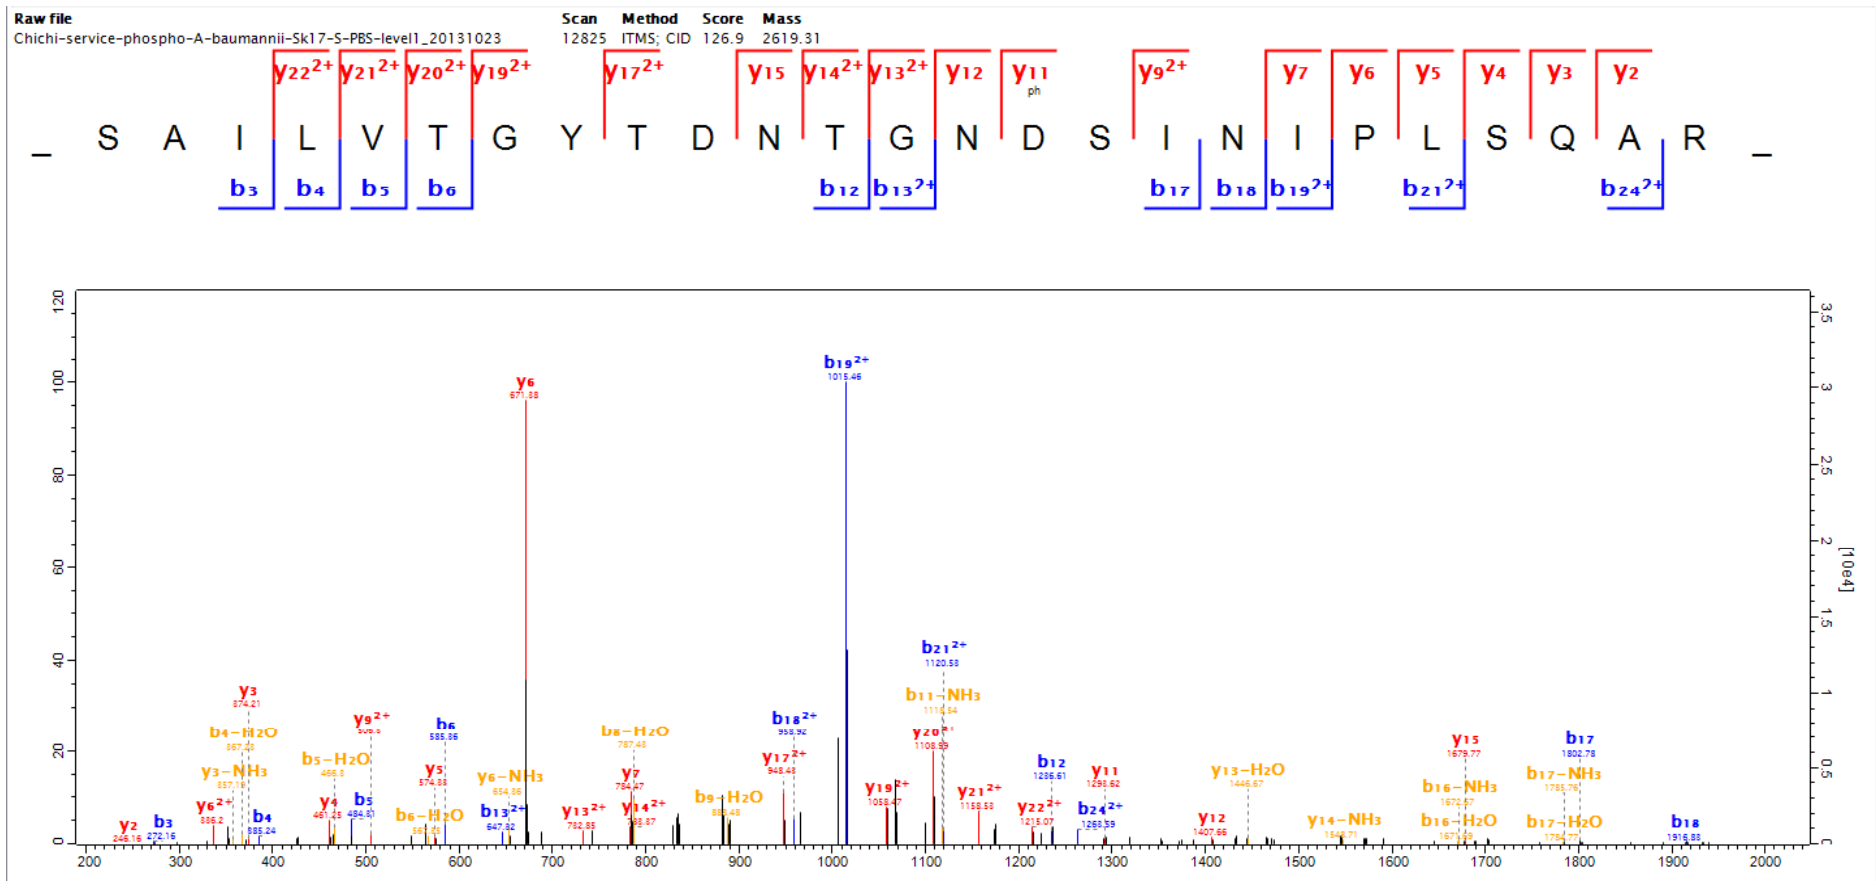

9-8

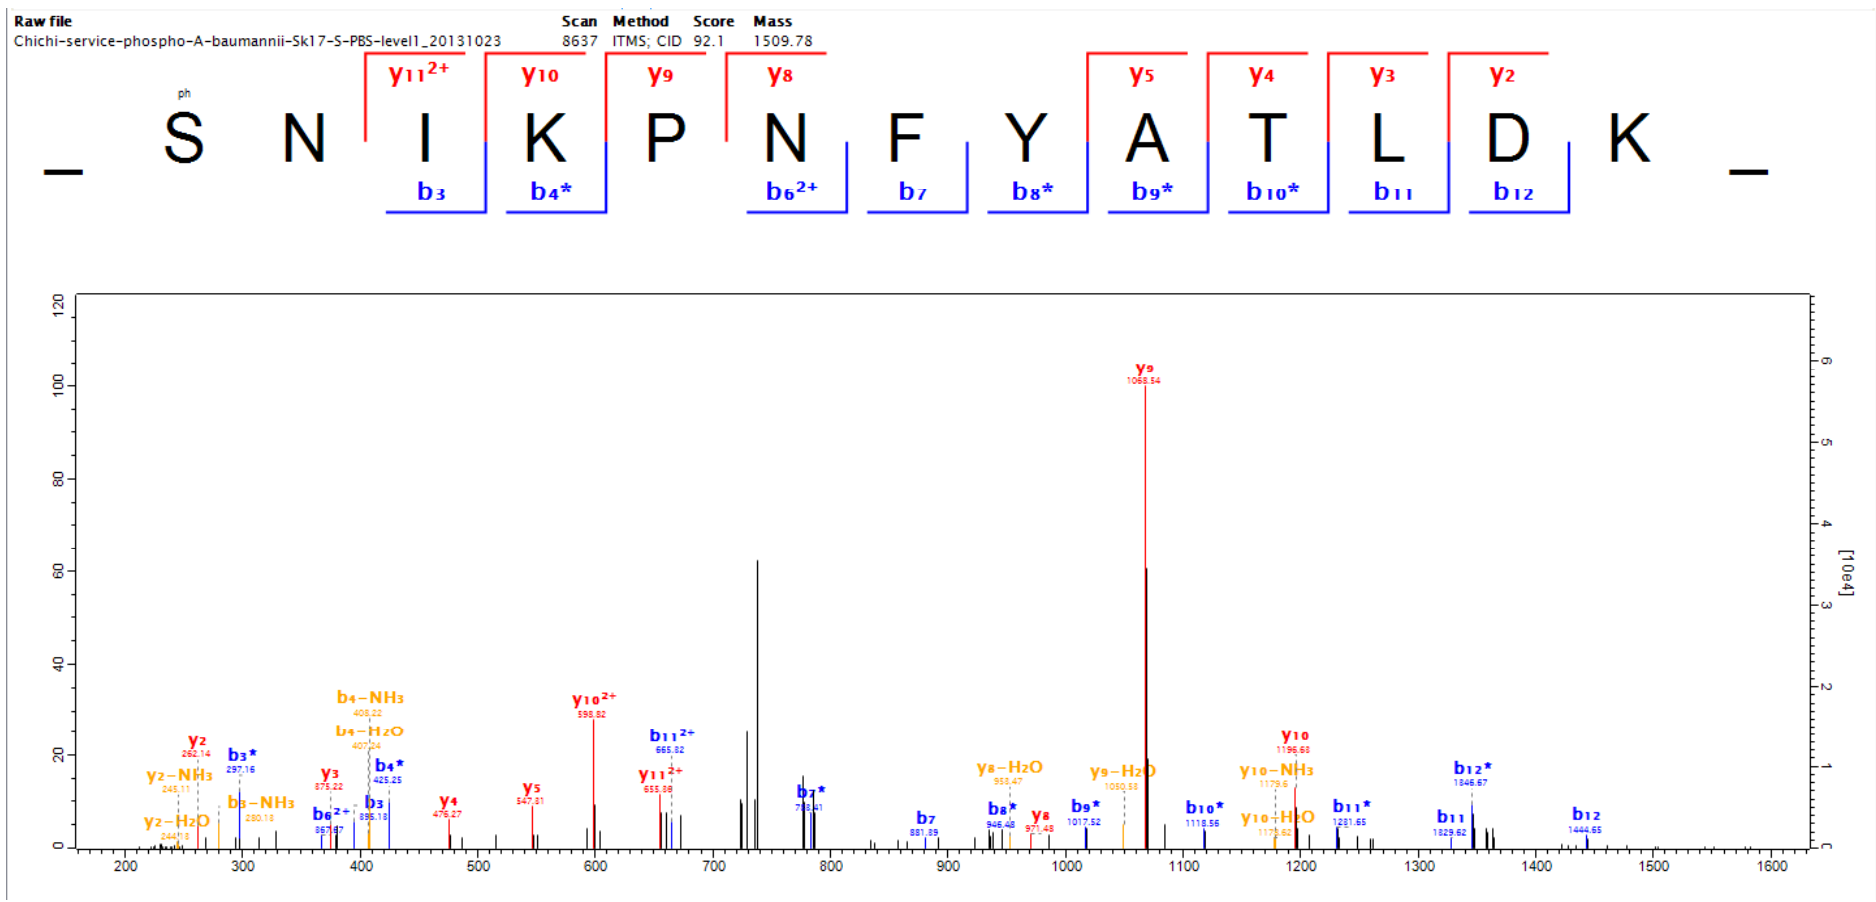

10-1

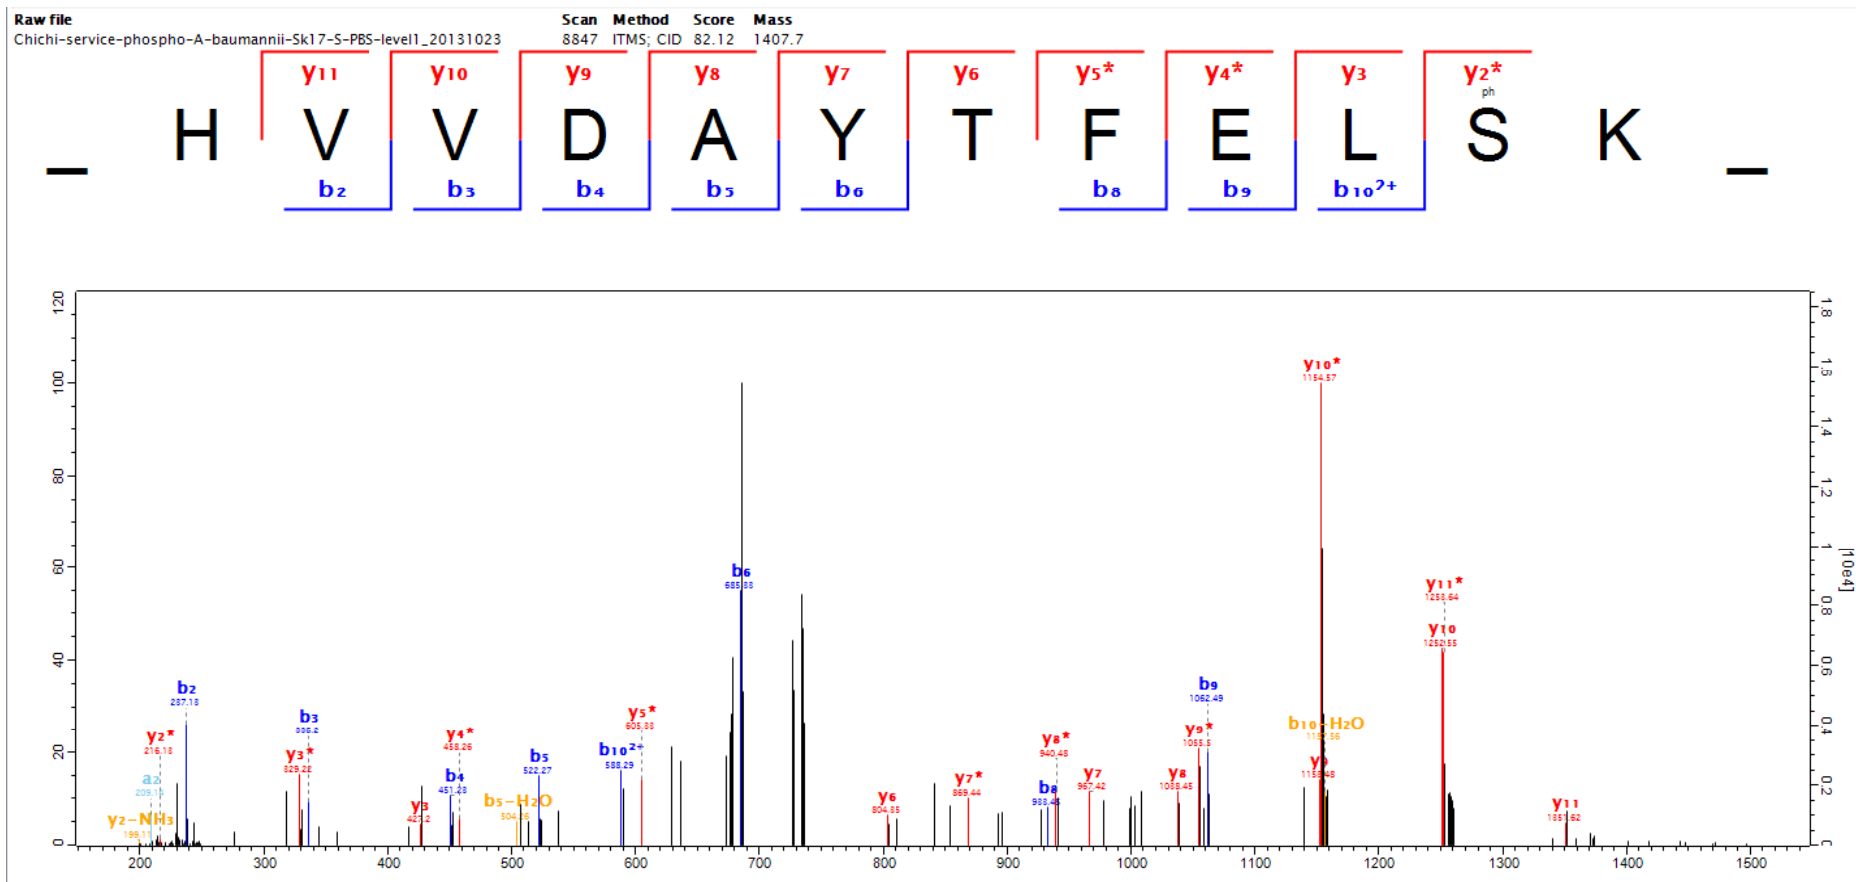

10-2

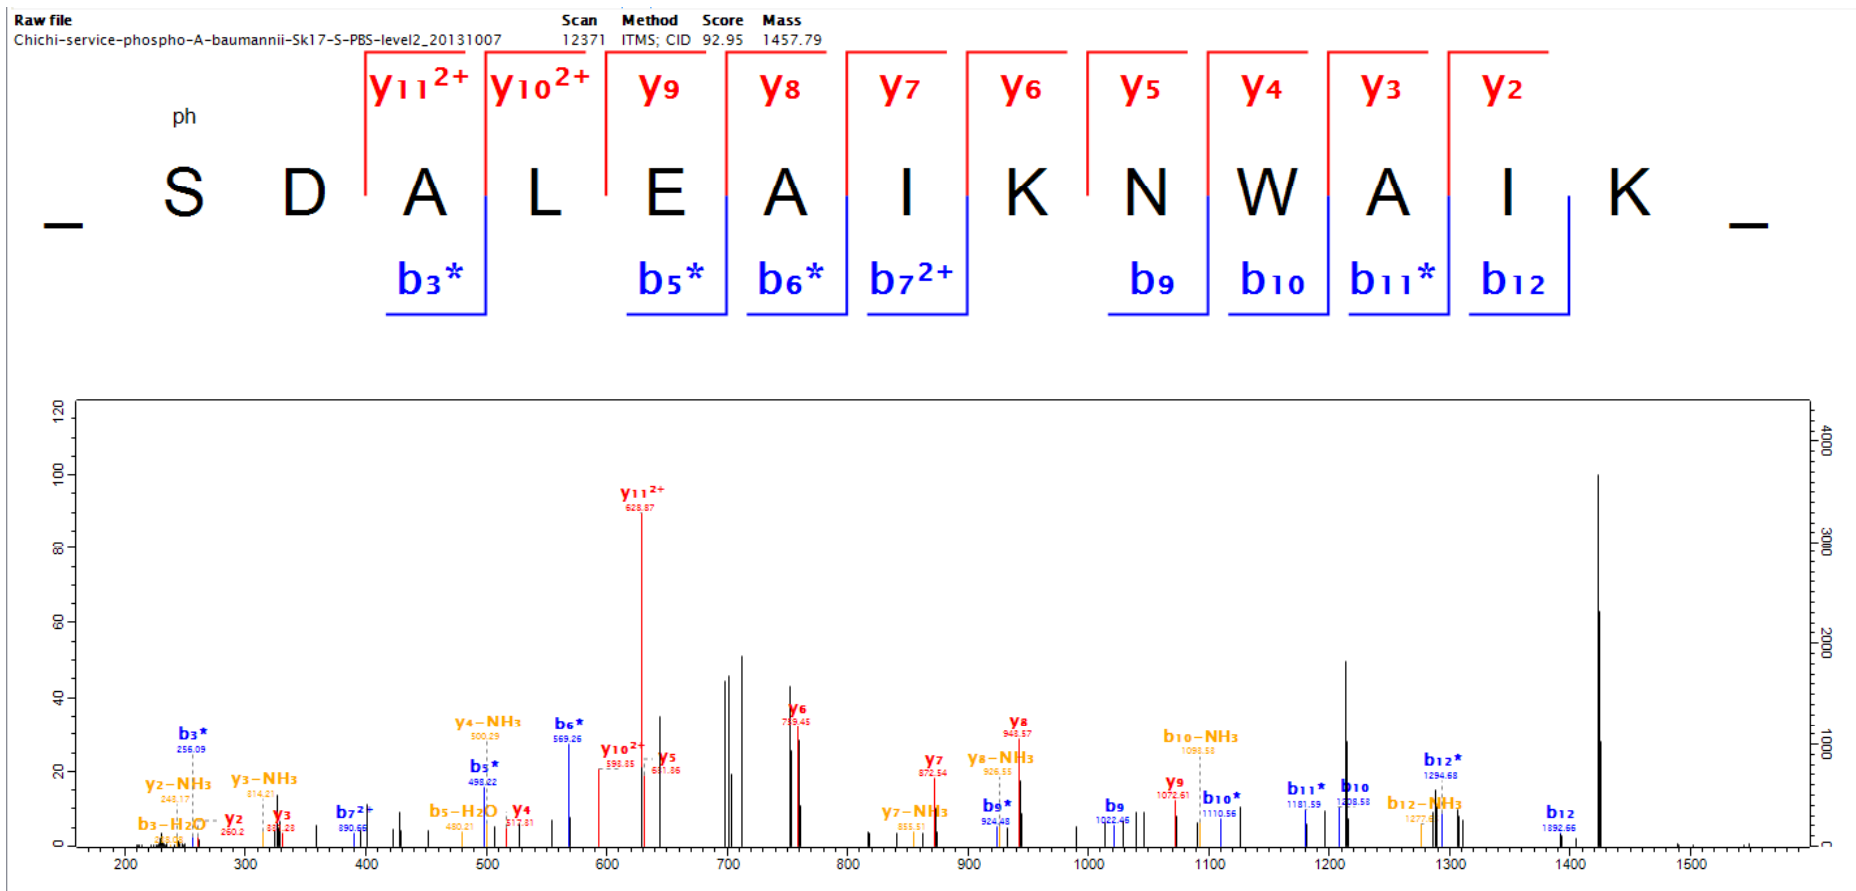



10-3

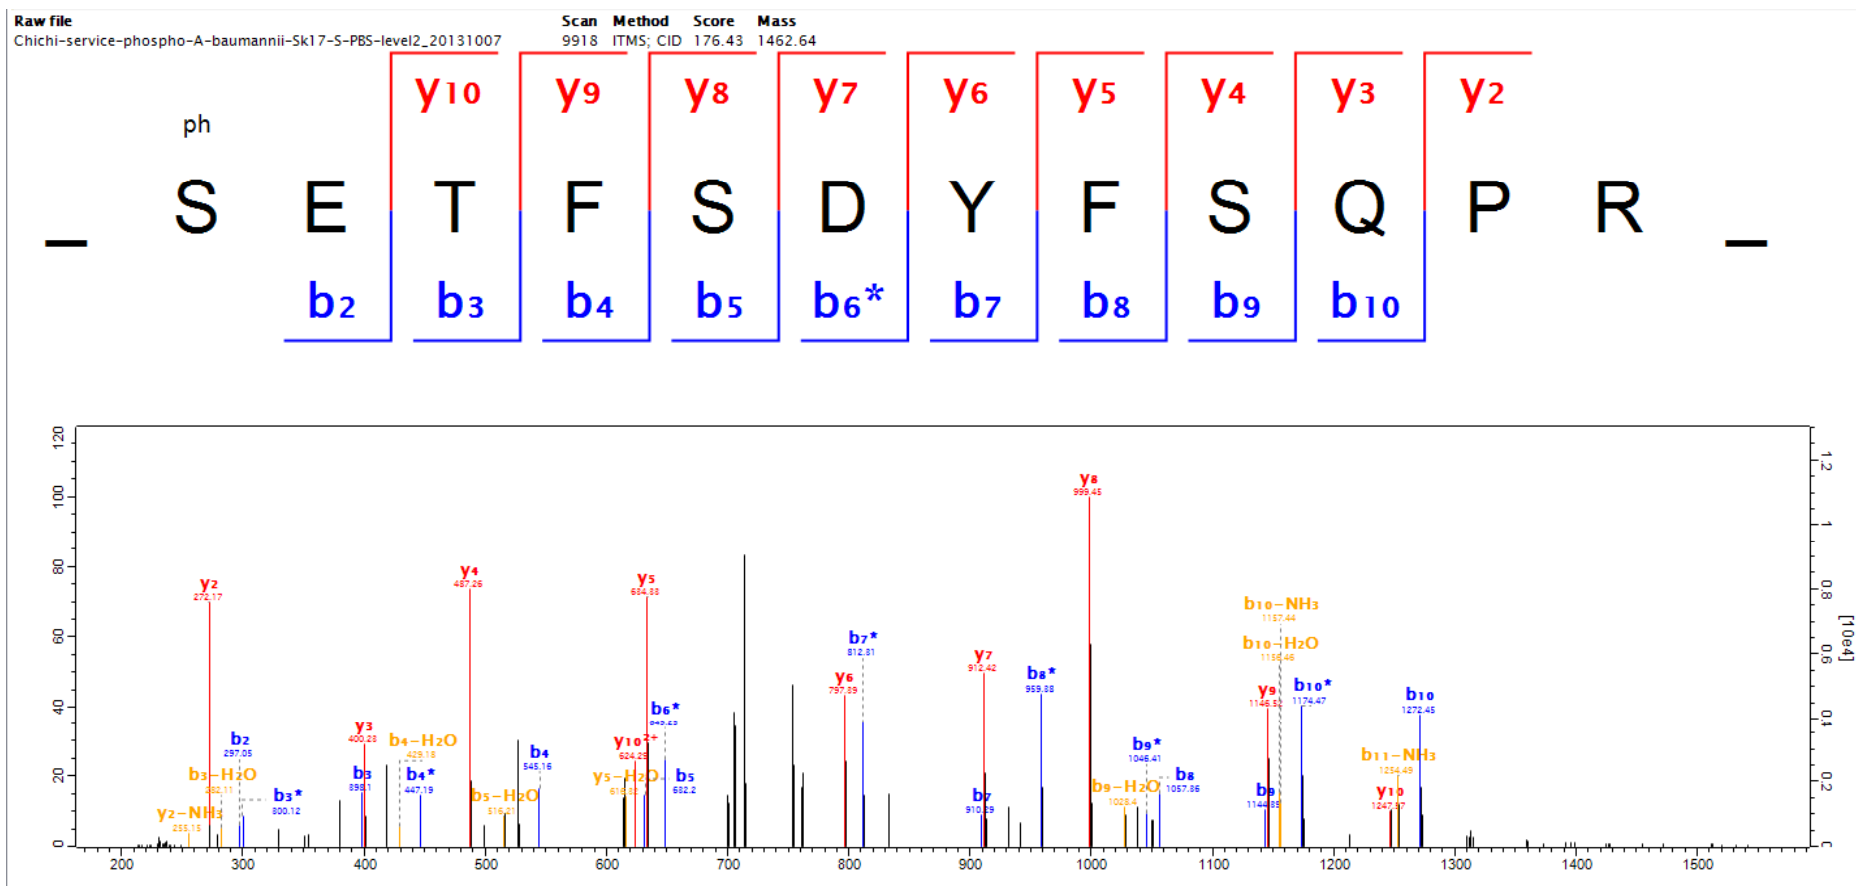

10-4

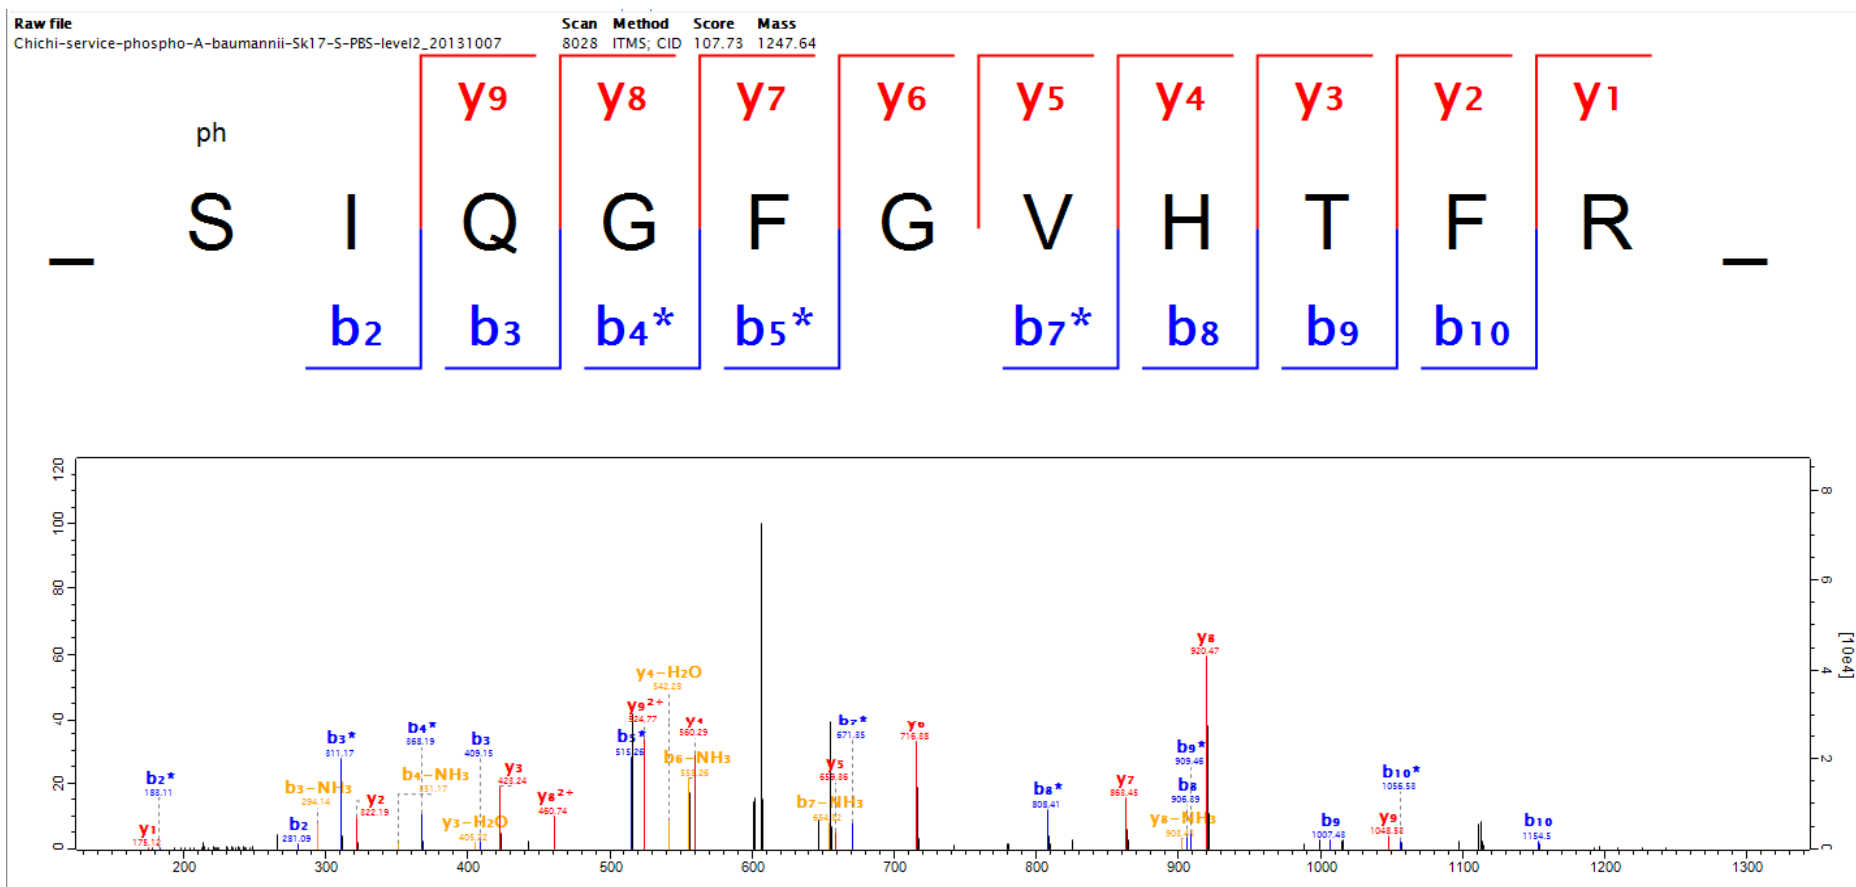

10-5

Scan number 17987 Raw file Chichi-service-phospho-A-baumanni-Sk17-S-EtOH-level1\_20131023  
Method ITMS; CID Pepti... 97.55

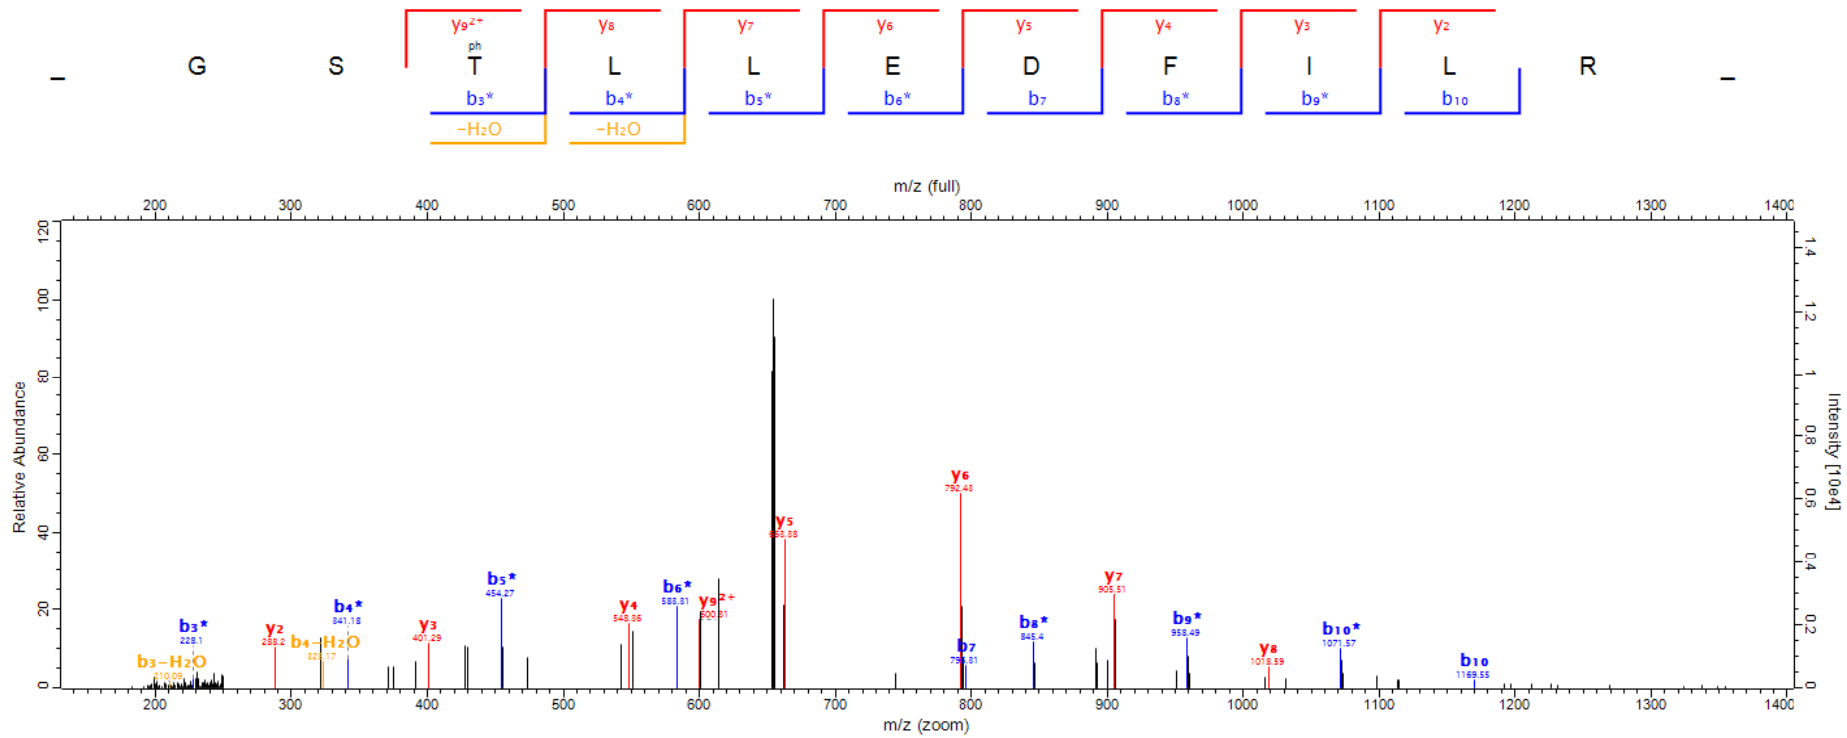

11-1

Raw file  
Chichi-service-phospho-A-baumannii-Sk17-S-PBS-level2\_20131007

| Scan | Method    | Score | Mass    |
|------|-----------|-------|---------|
| 4822 | ITMS; CID | 57.53 | 1417.69 |

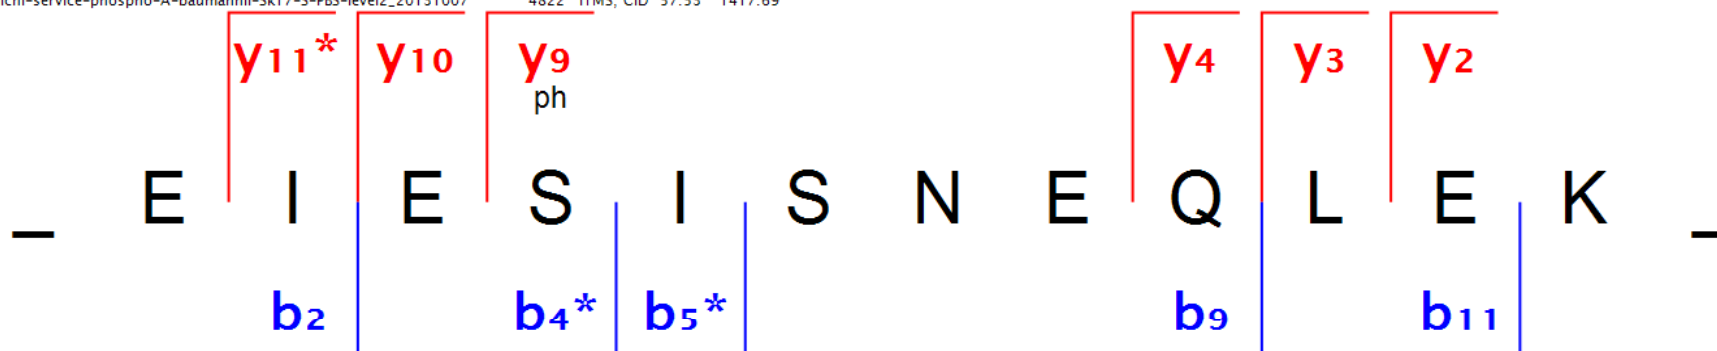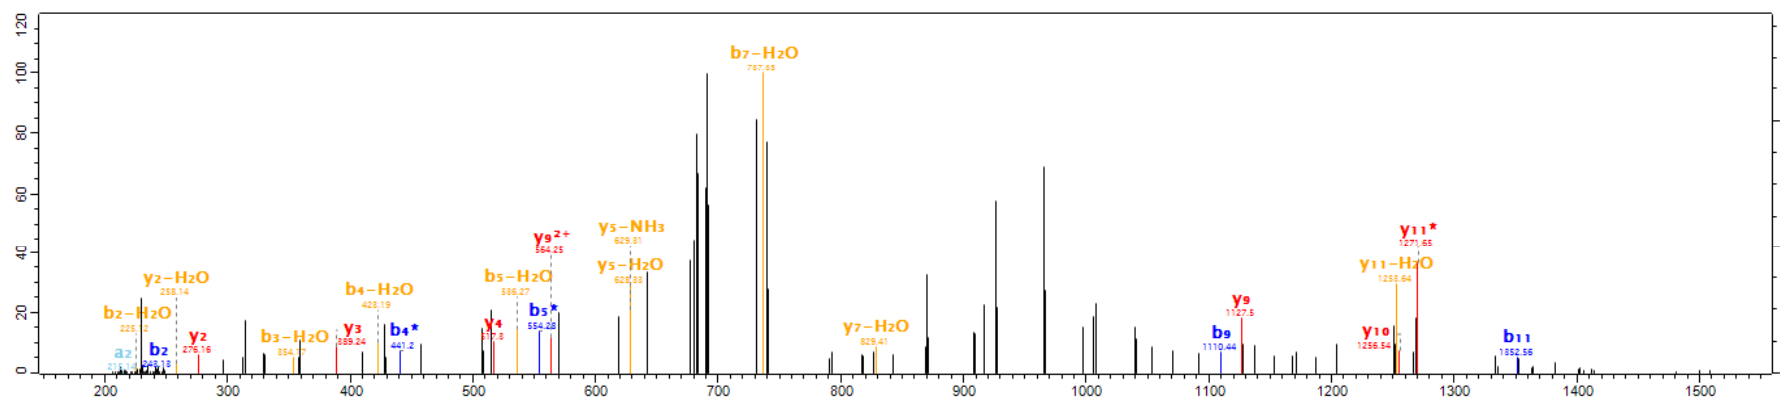

11-2

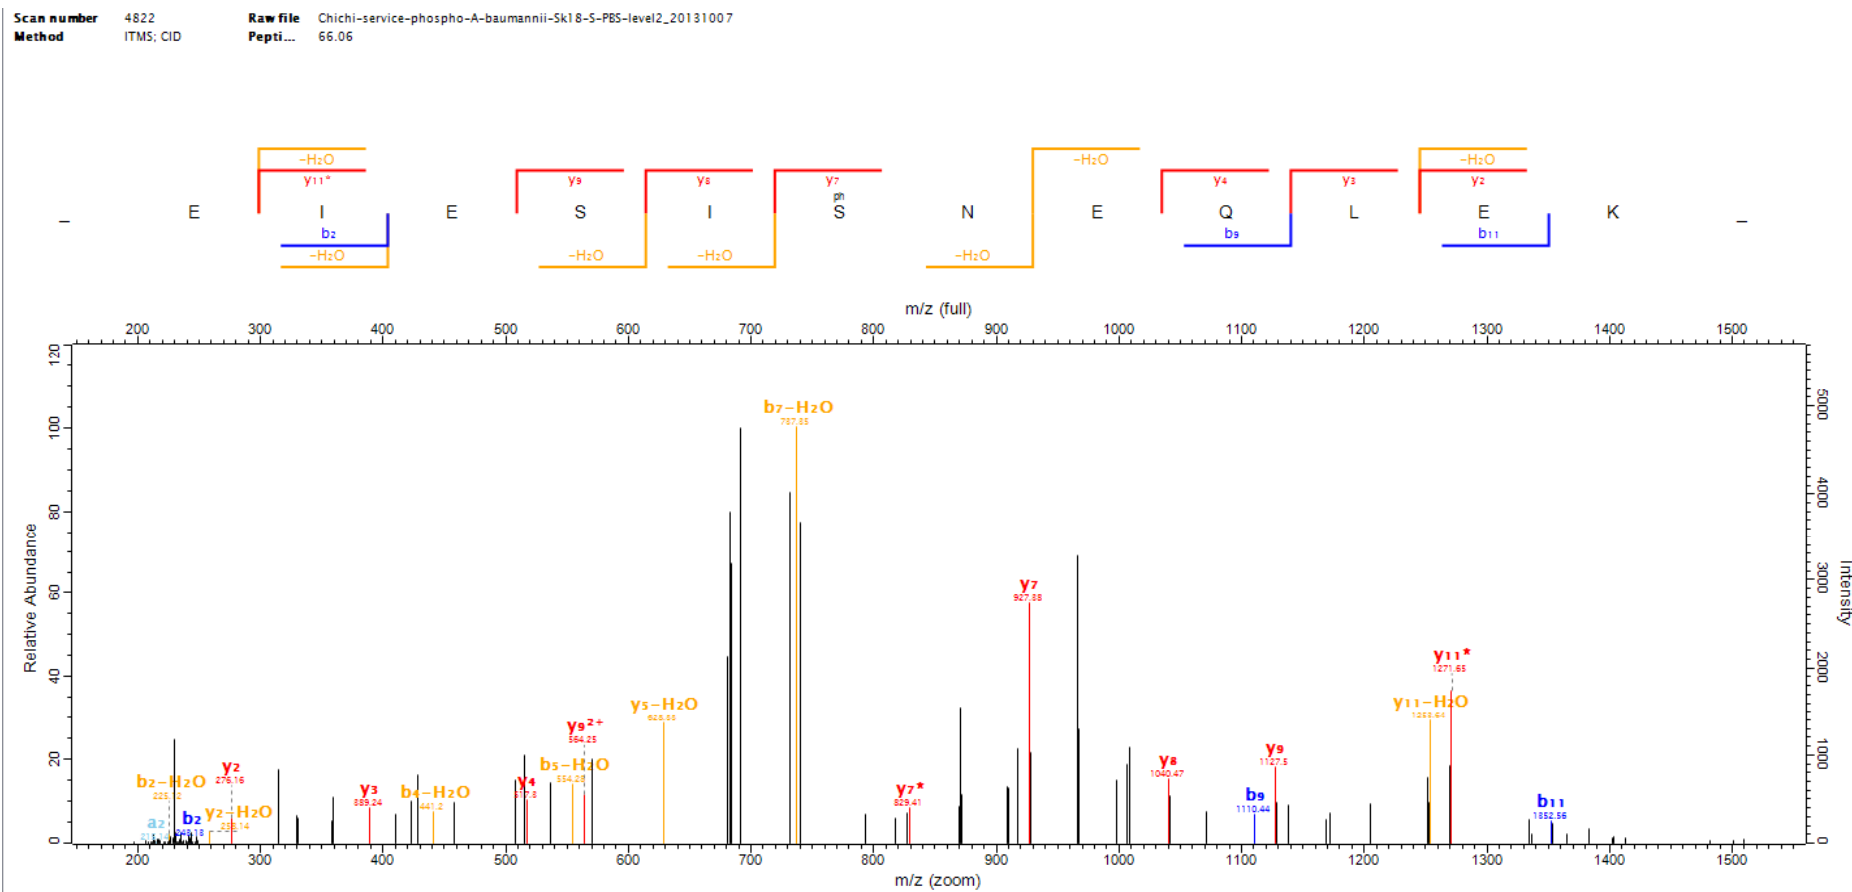

11-3

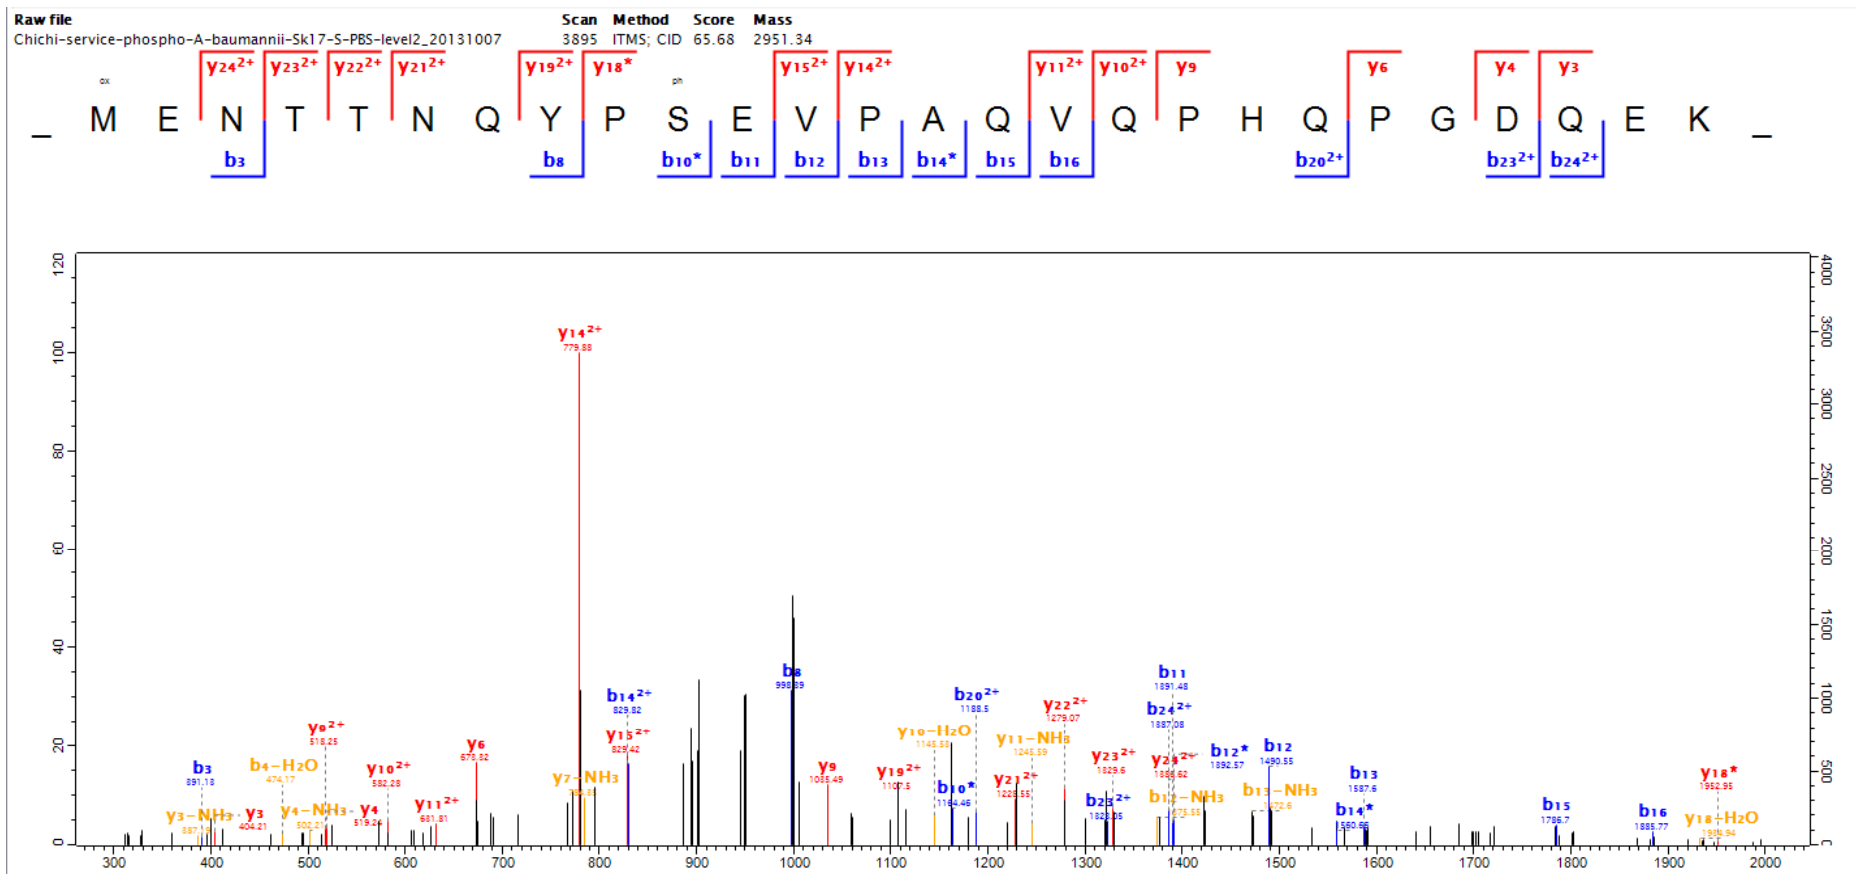

11-4

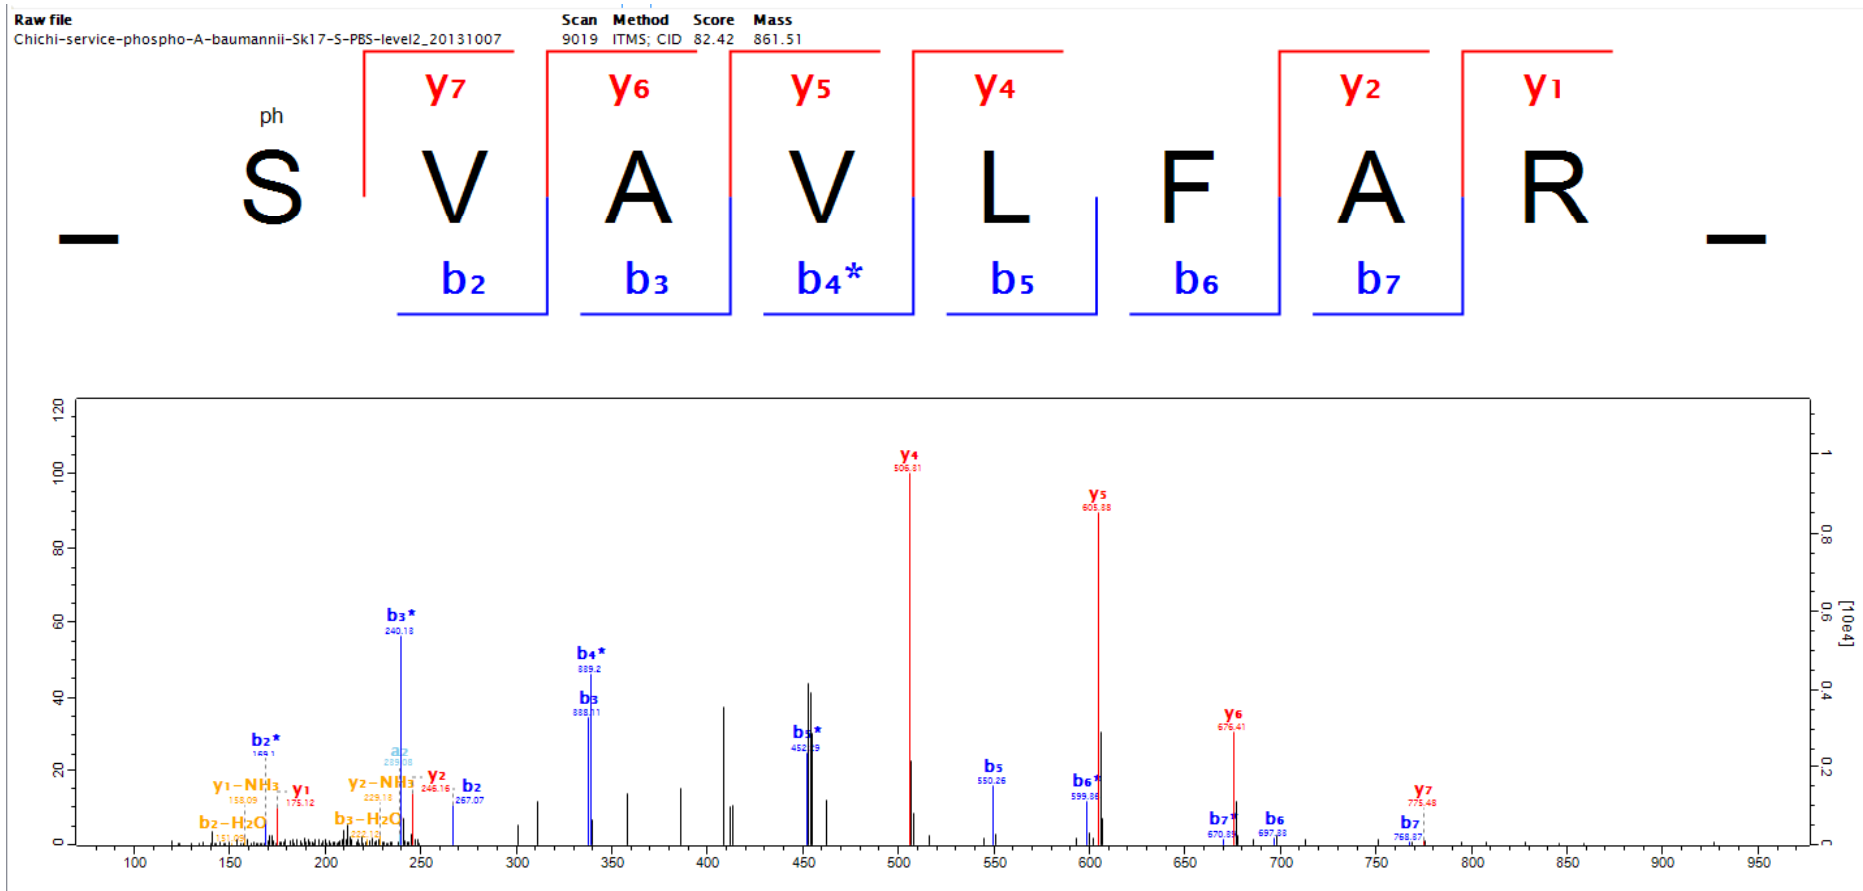

12-1

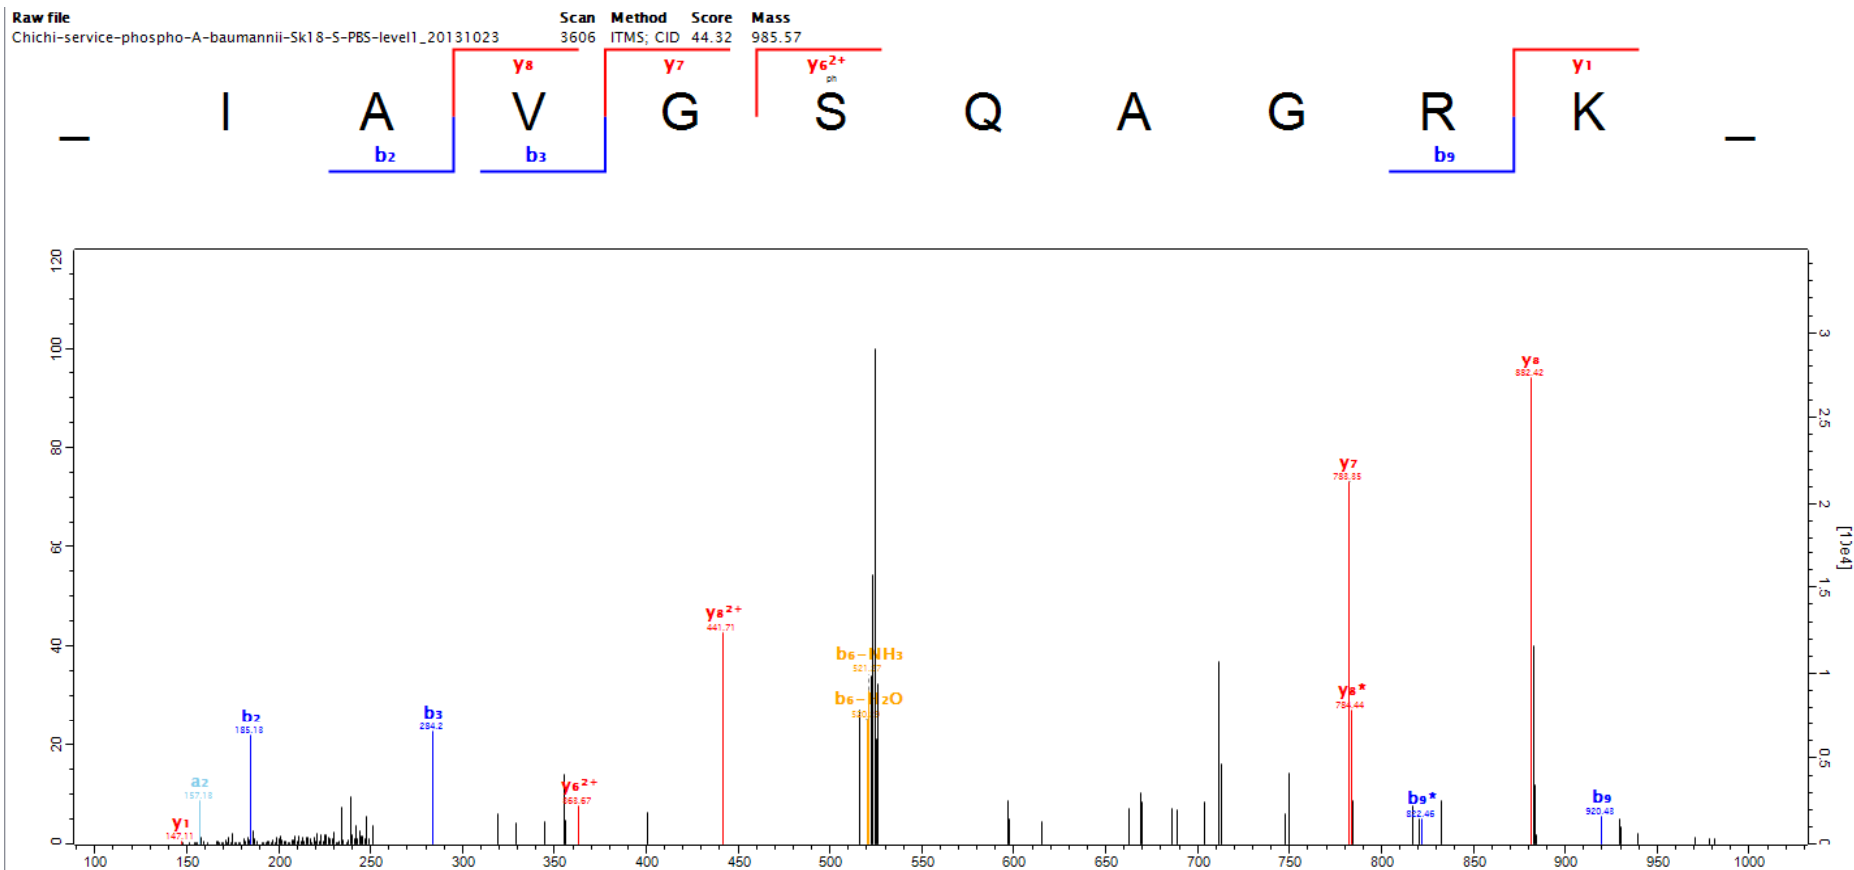



12-2

Scan number 1016 Raw file Chichi-service-phospho-A-baumannii-Sk17-5-EtOH-level2\_20131007  
Method ITMS; CID Pepti... 32.37

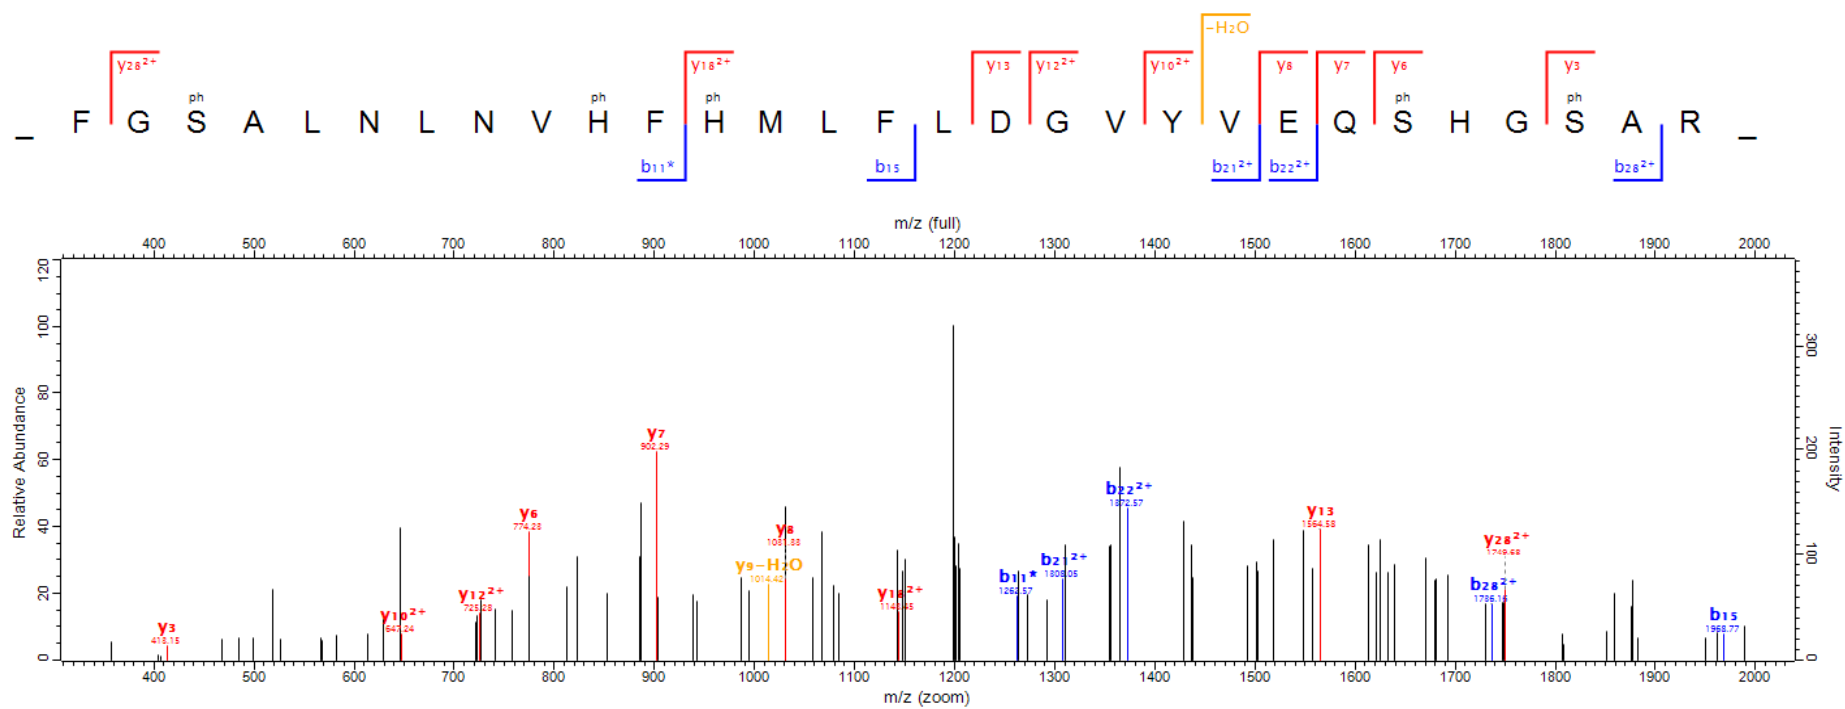

13-1

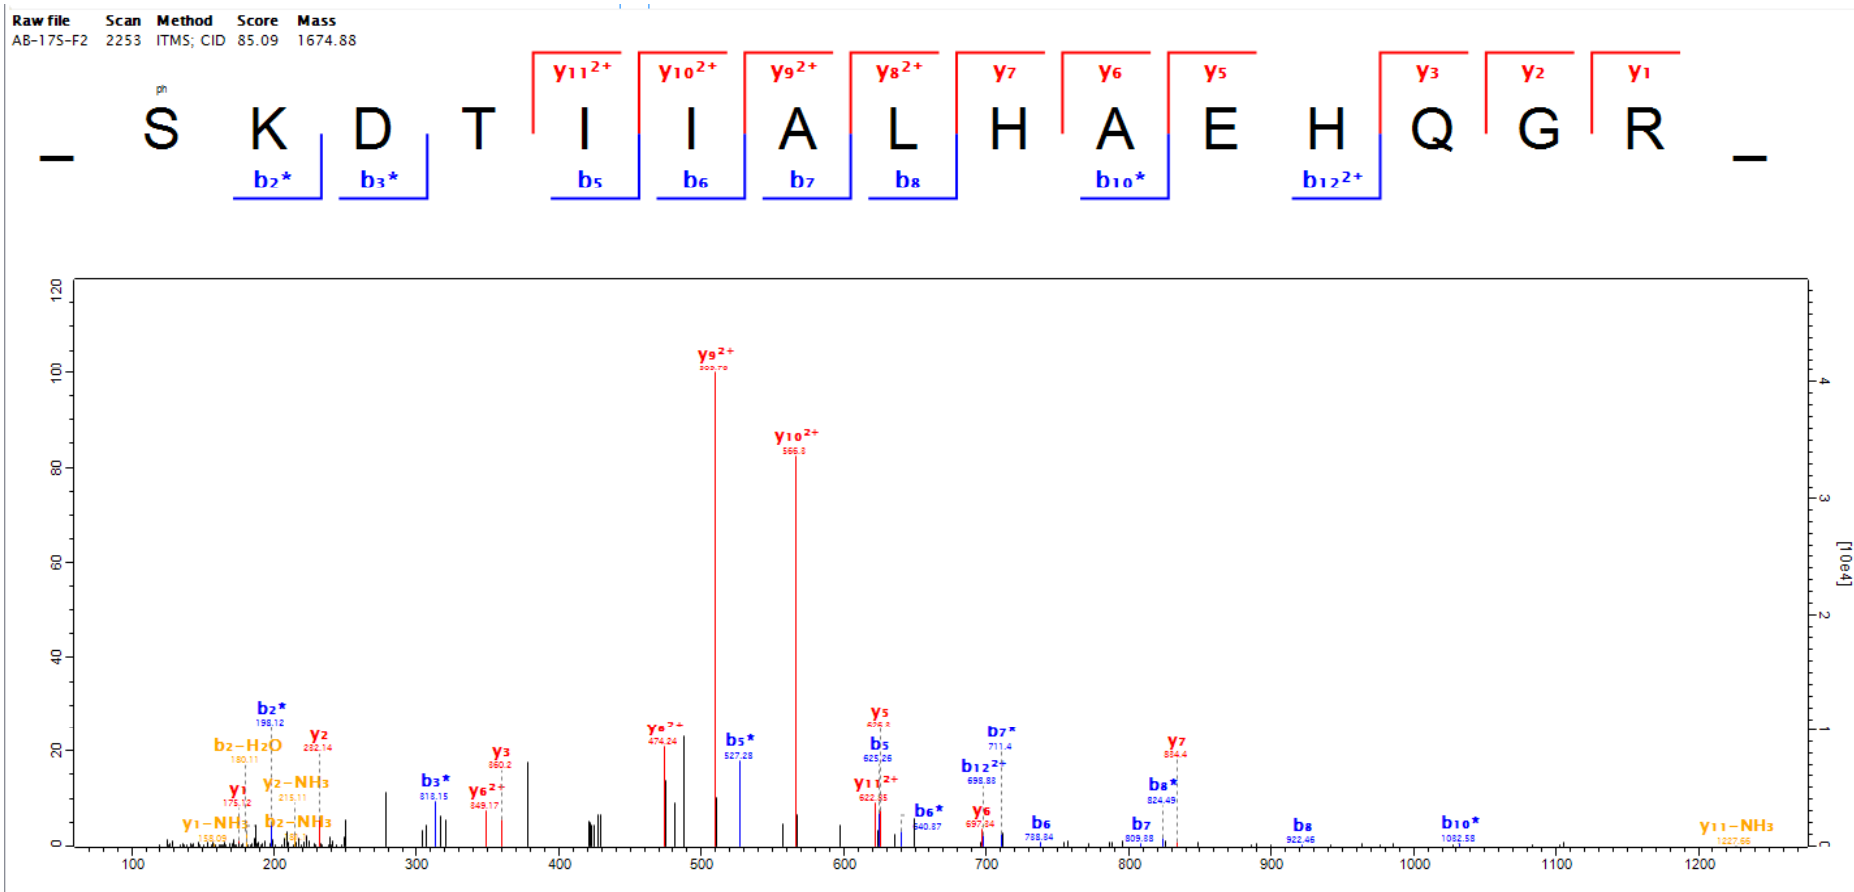

13-2

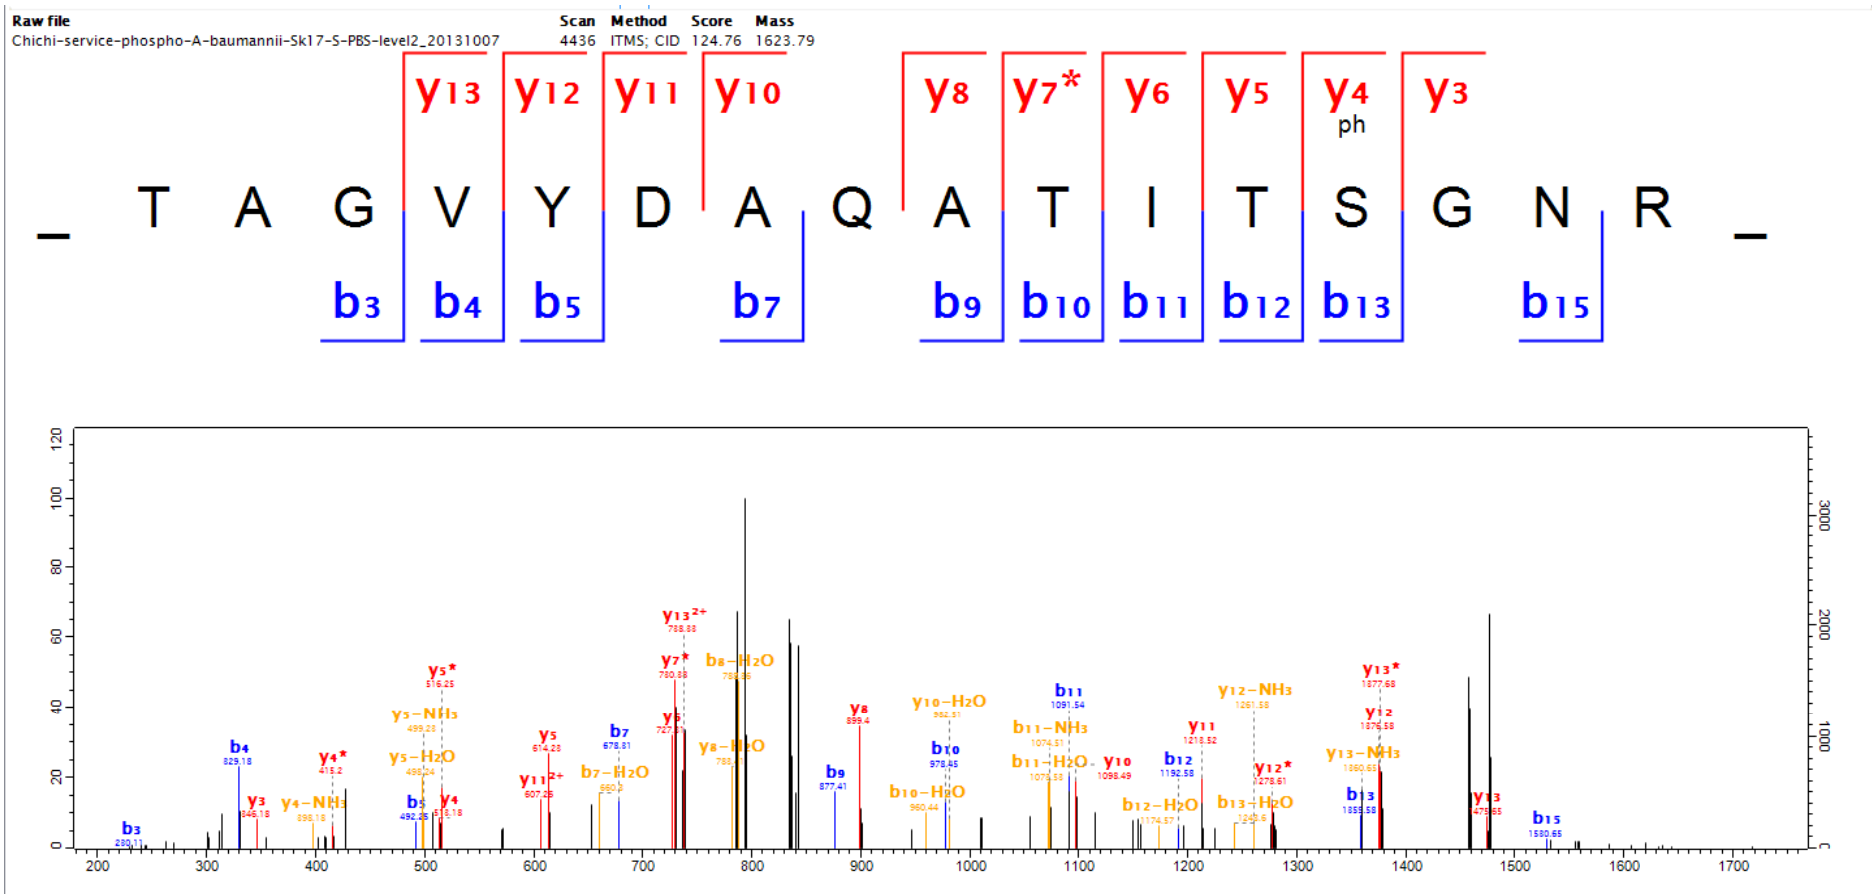

Raw file  
Chichi-service-phospho-A-baumanni-Sk17-S-EtOH-level1\_20131023

Scan Method Score Mass  
6032 ITMS; CID 37.09 1665.84

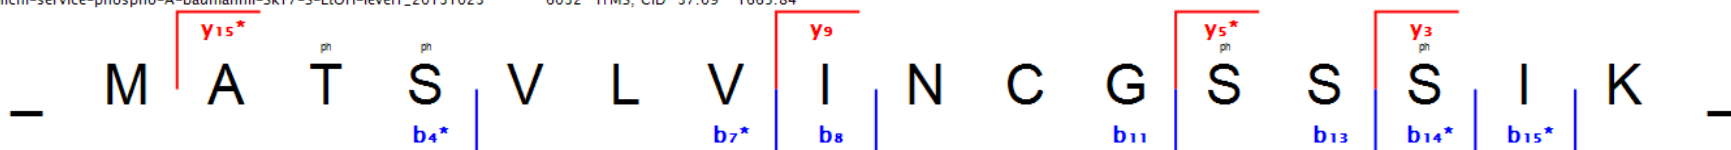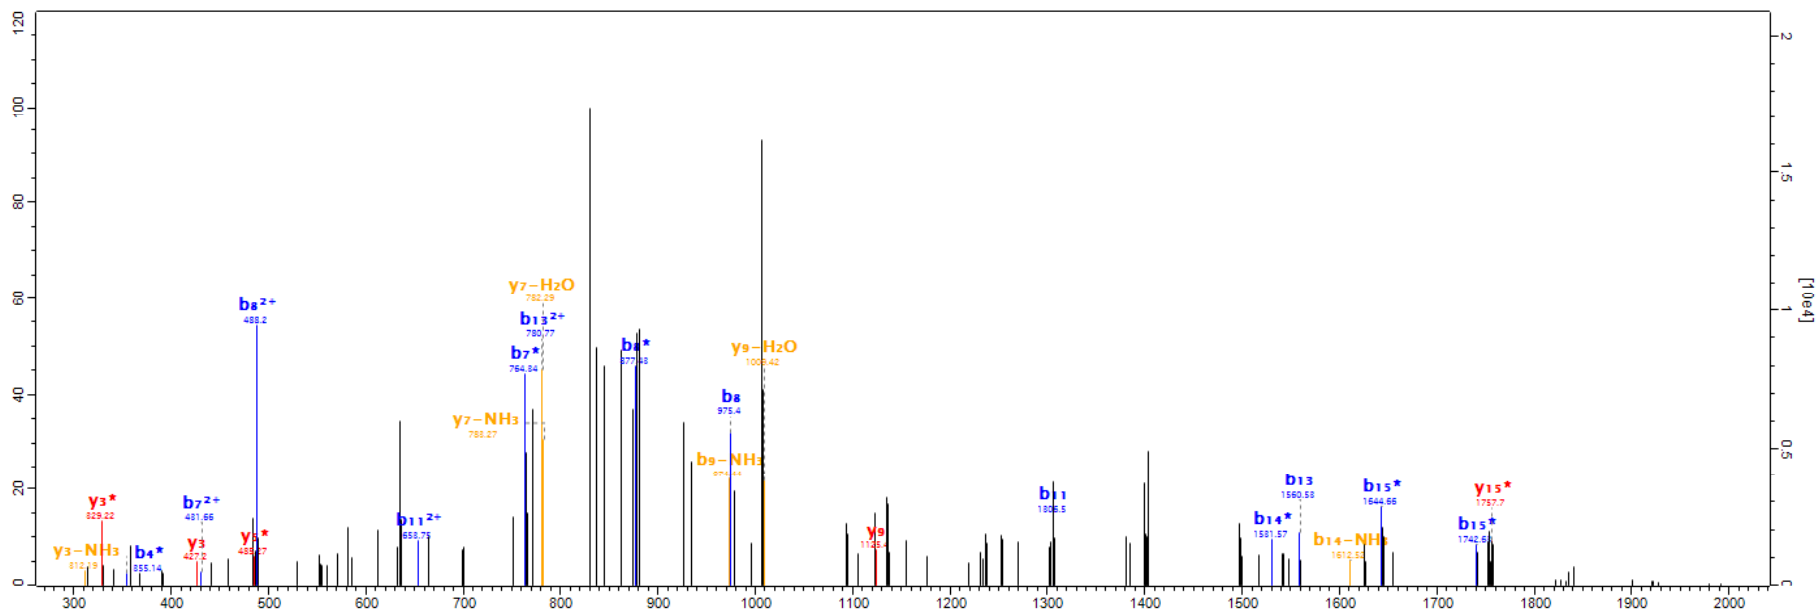

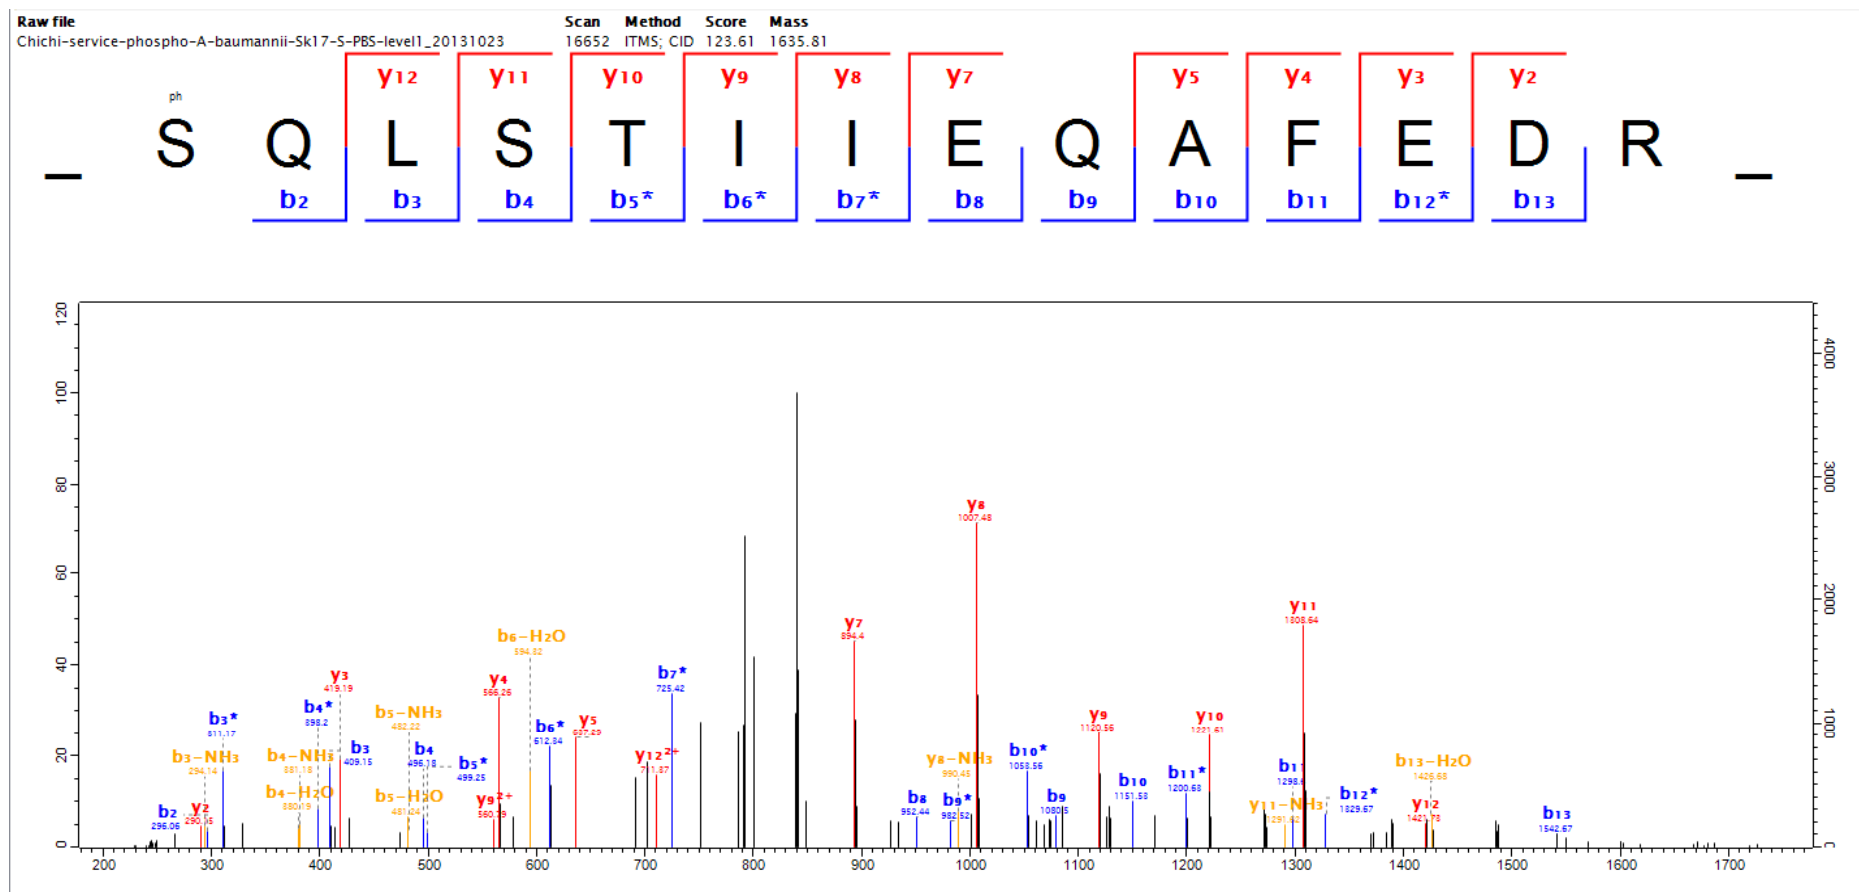

16-1

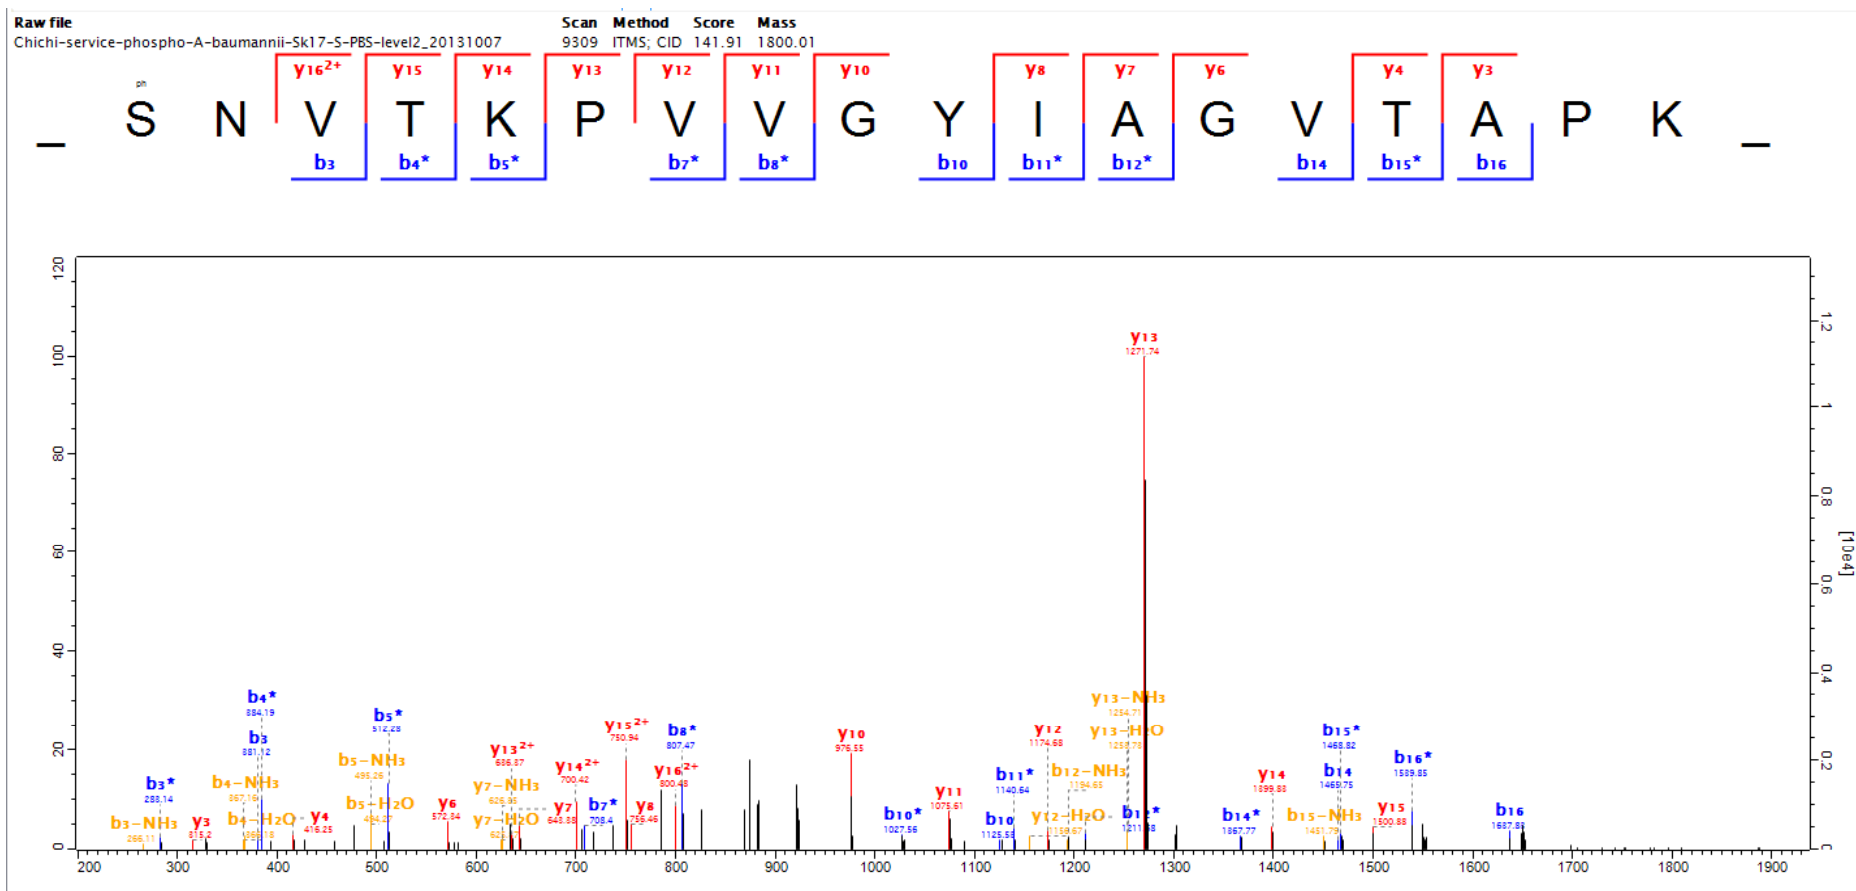

16-2

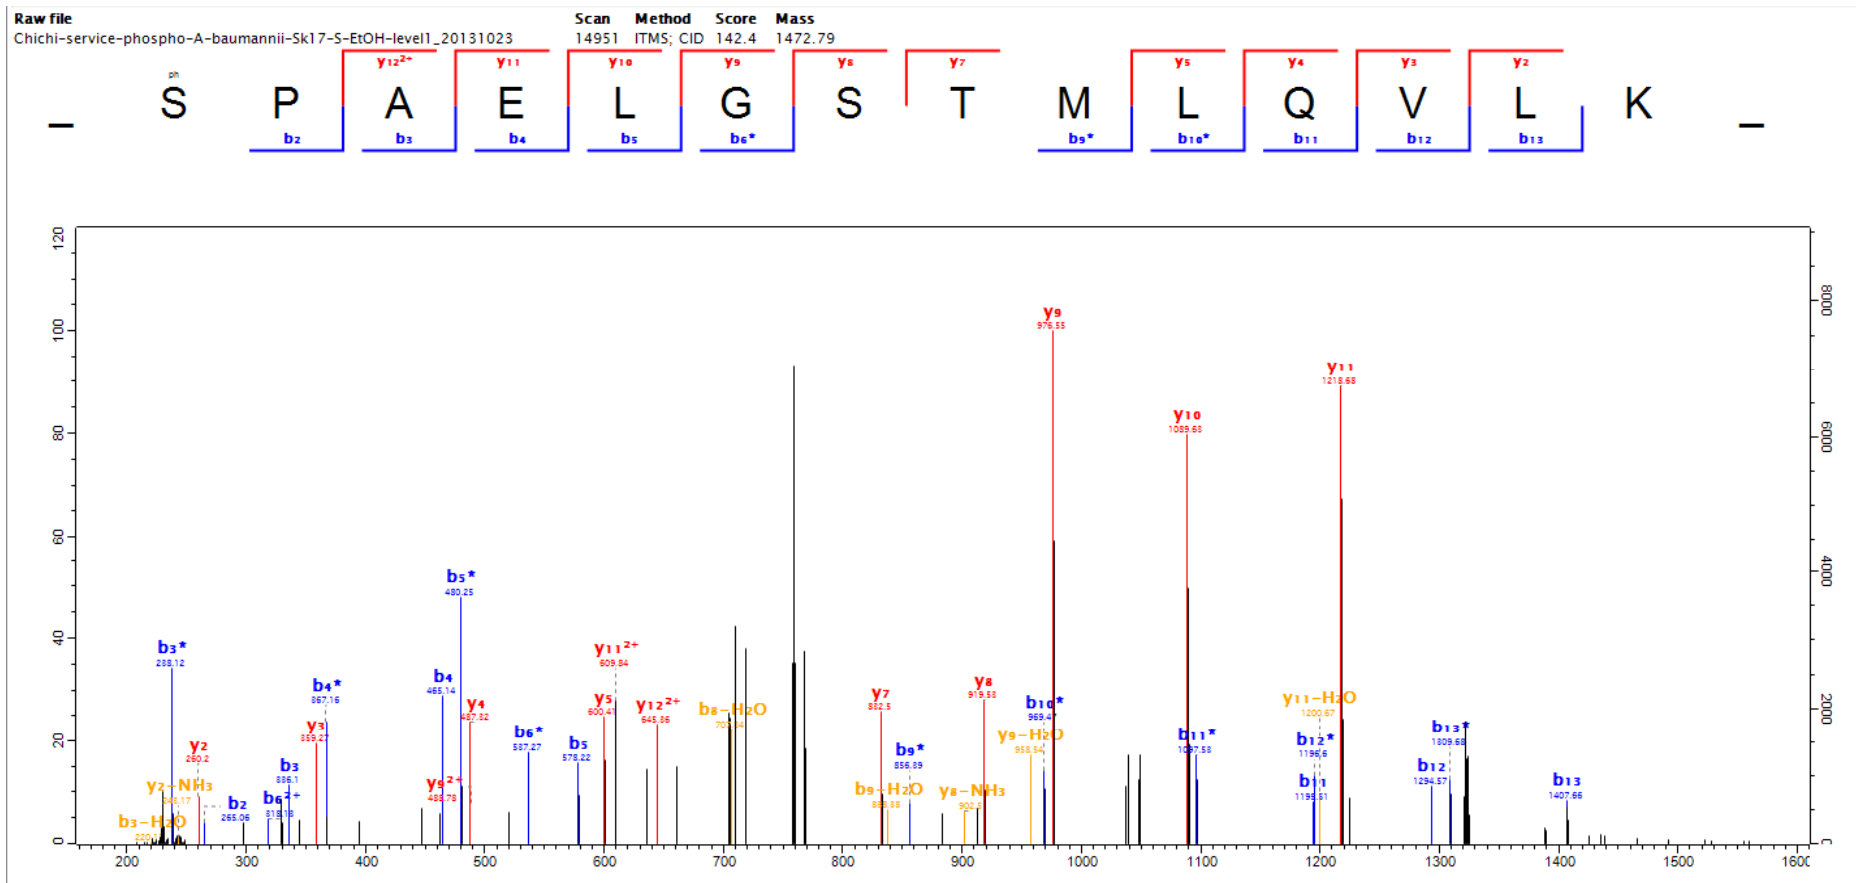

16-3

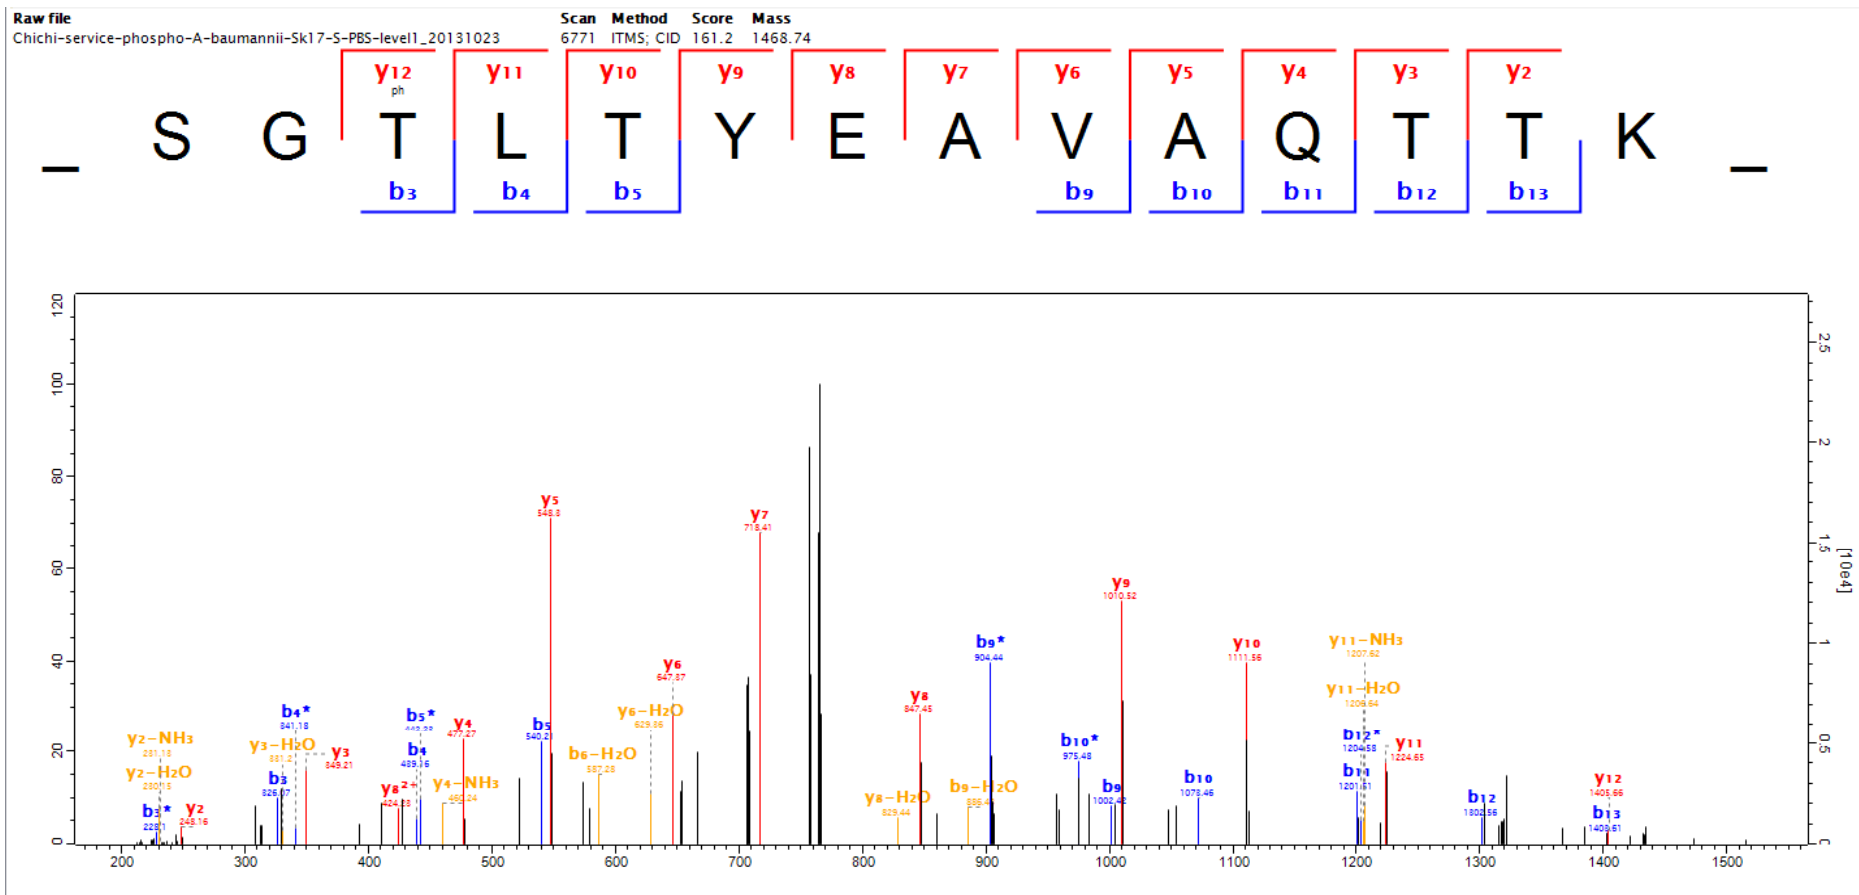



# 16-4

Scan number 2483 Raw file Chichi-service-phospho-A-baumannii-Sk17-5-PBS-level2\_20131007  
 Method ITMS: CID Pepti... 92.93

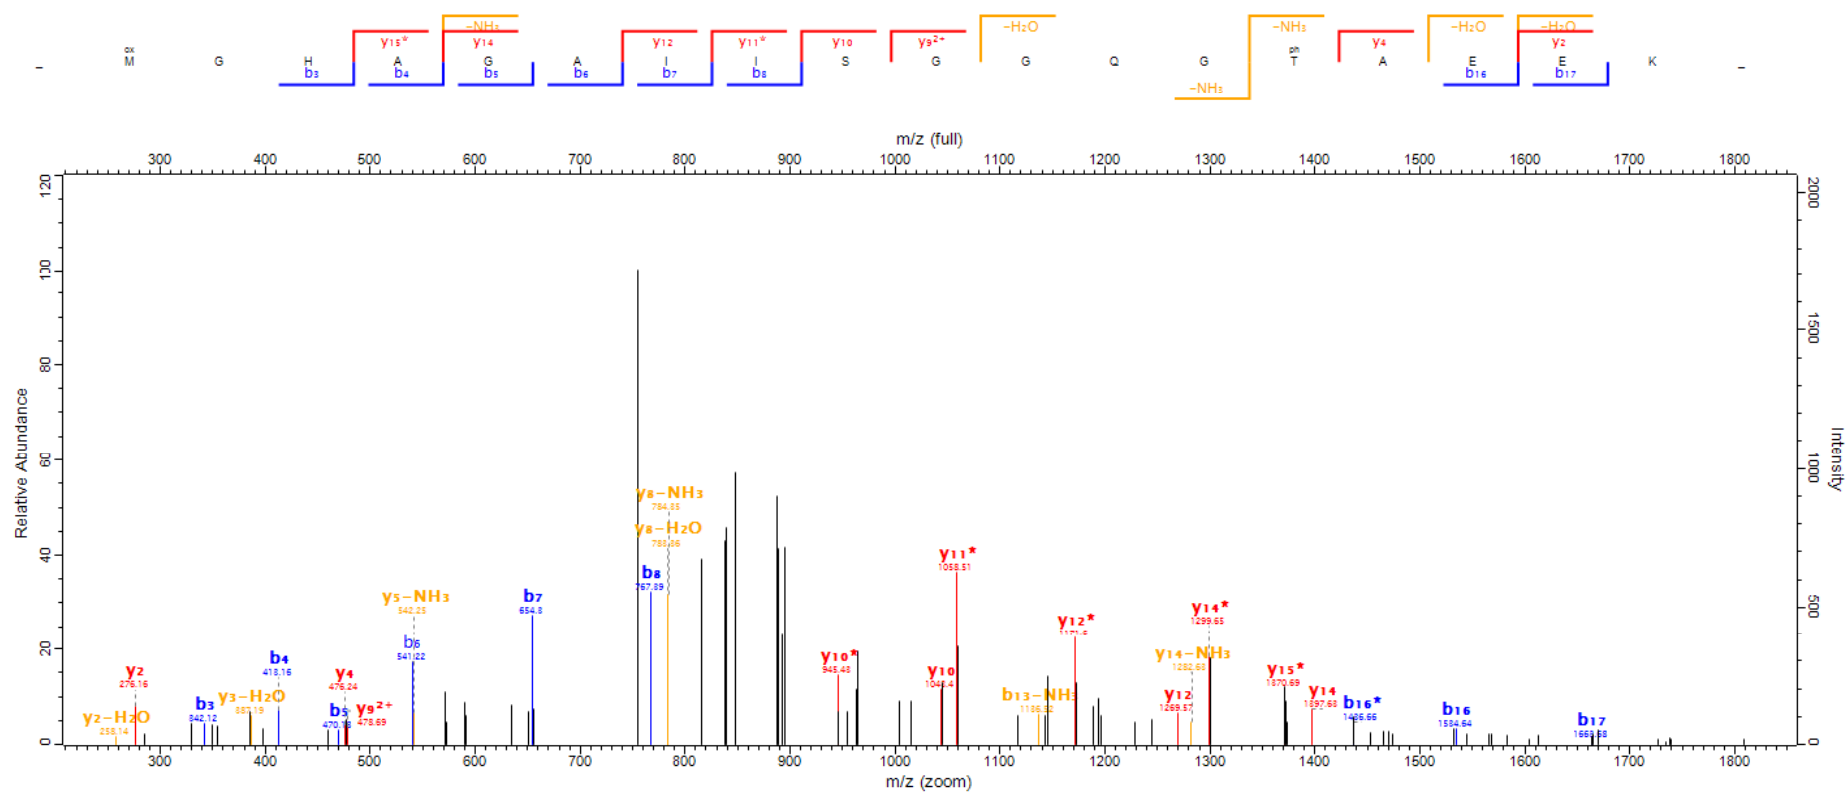

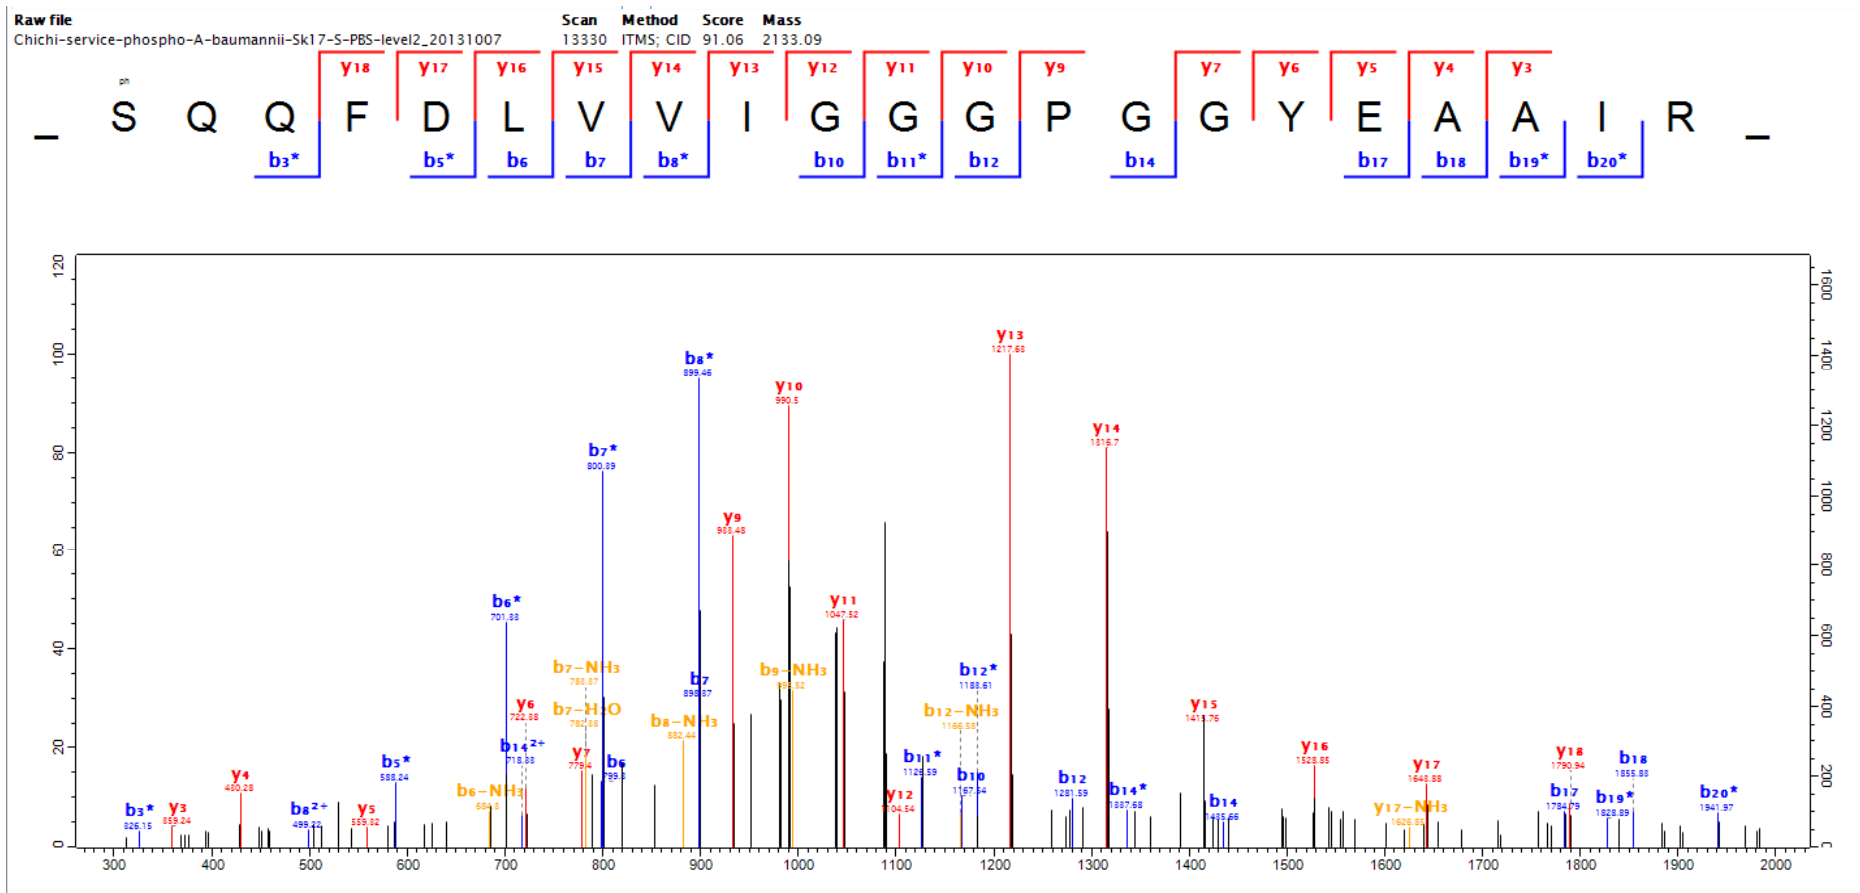

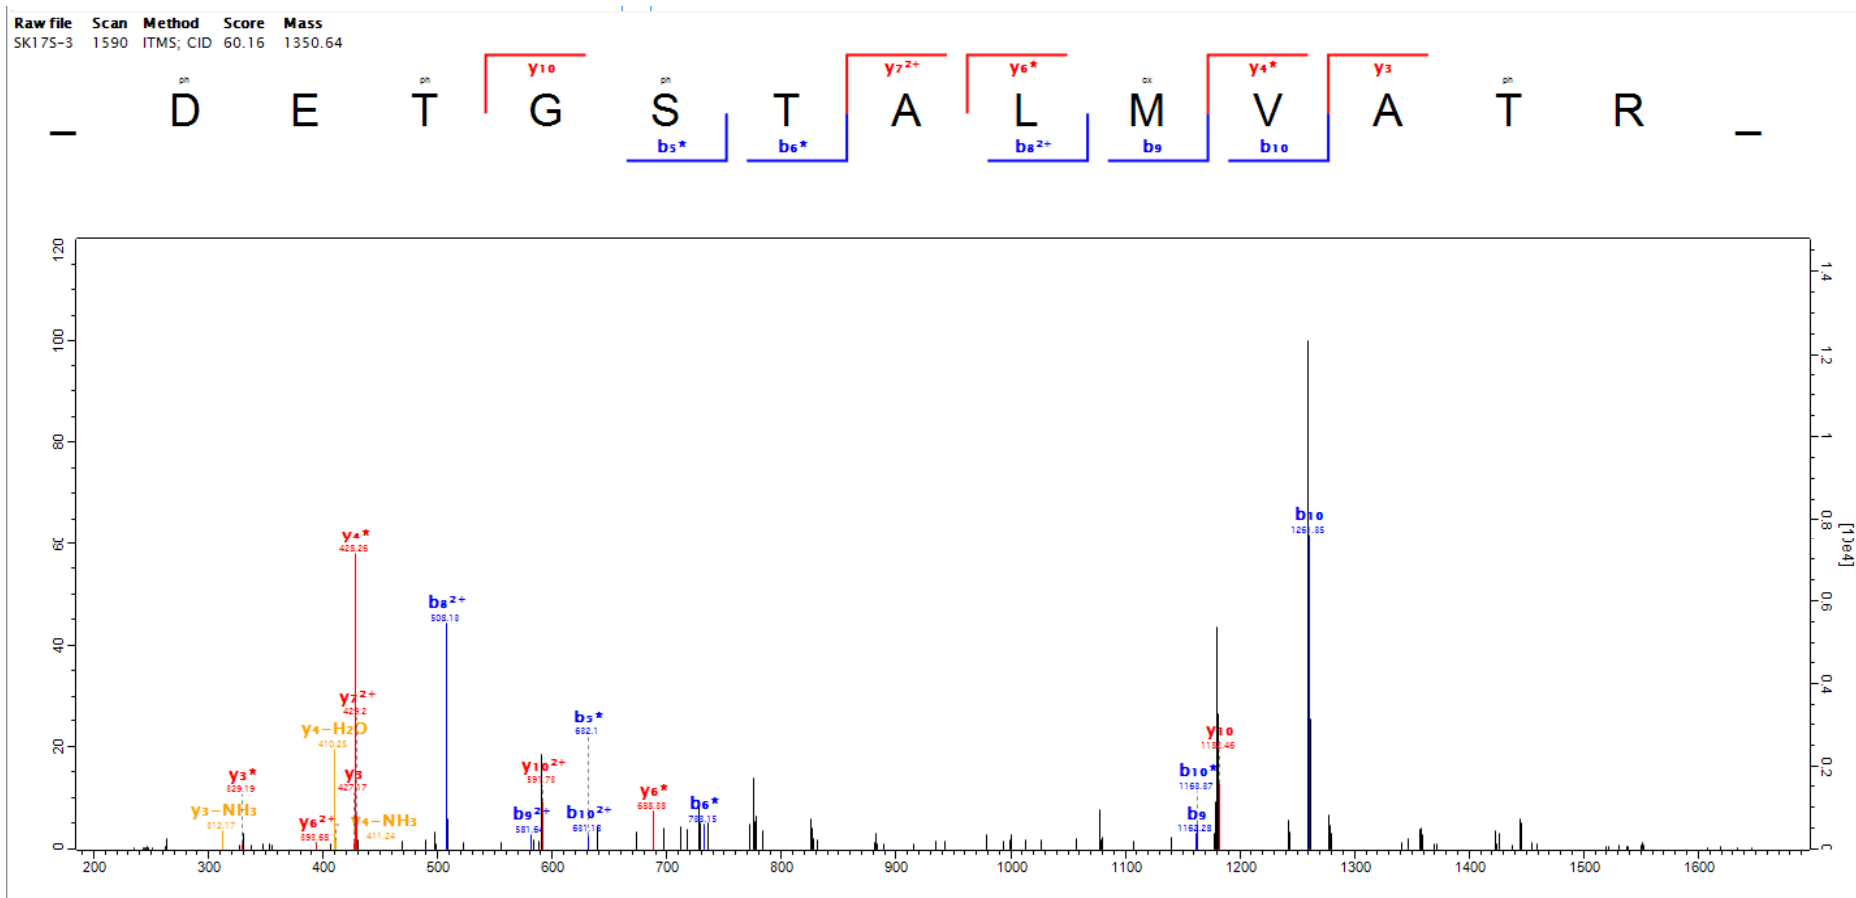

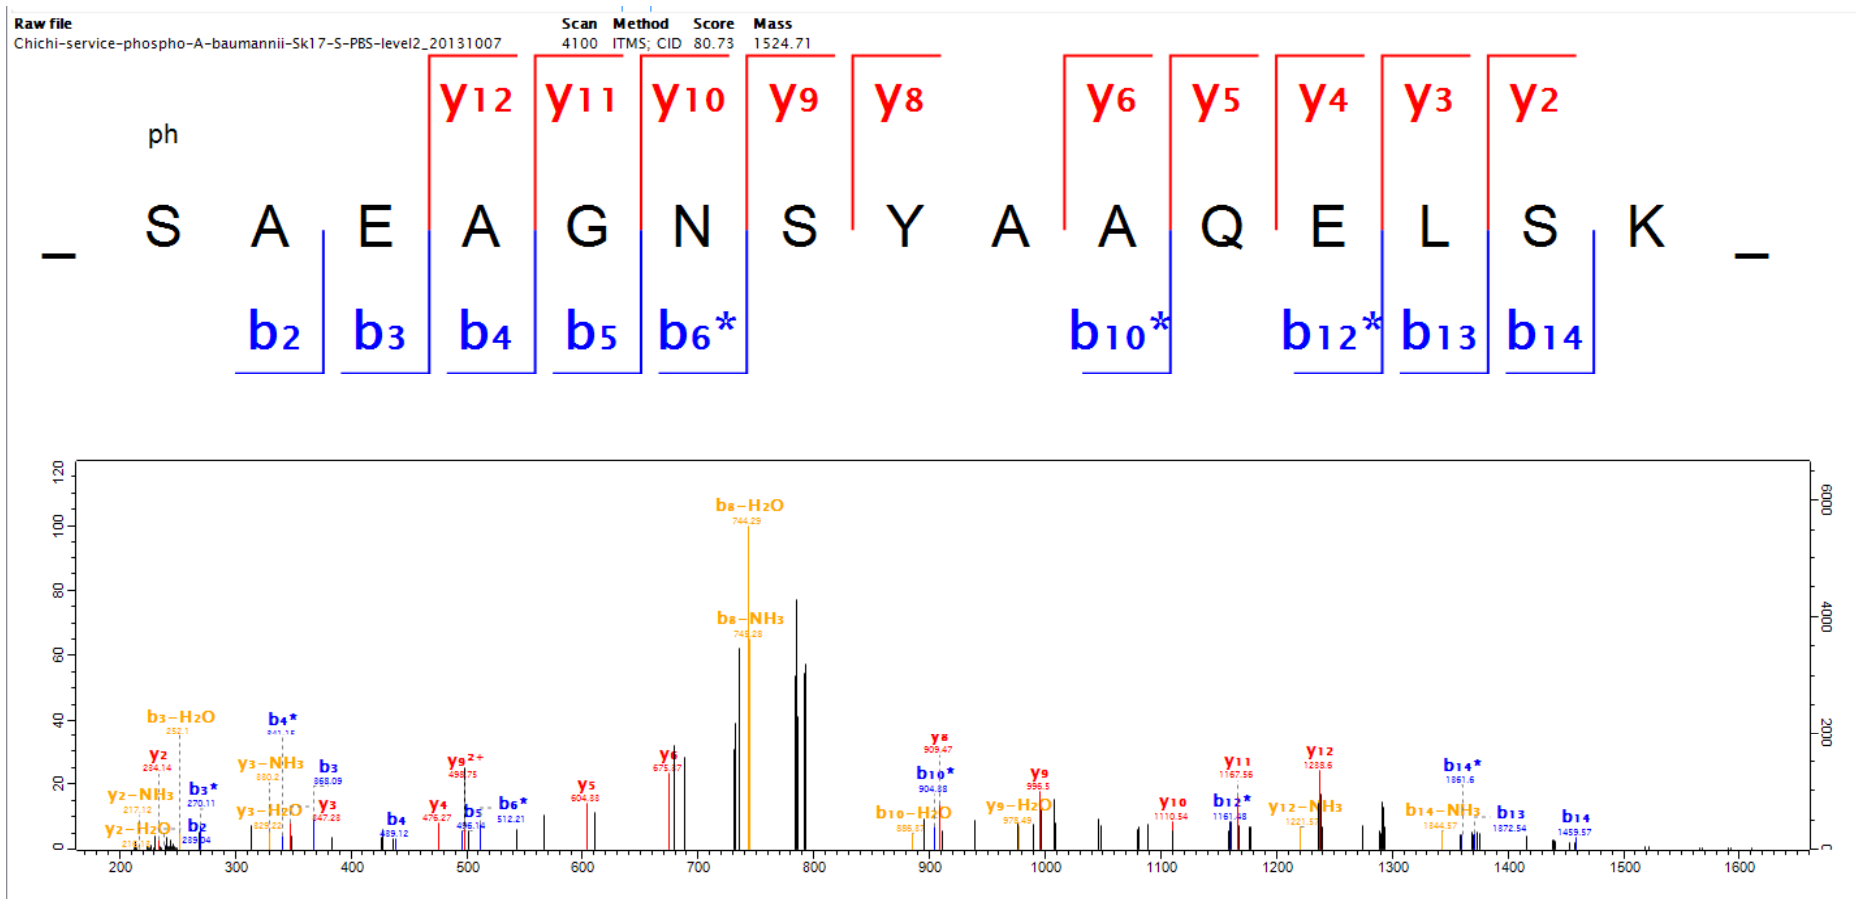

20-1

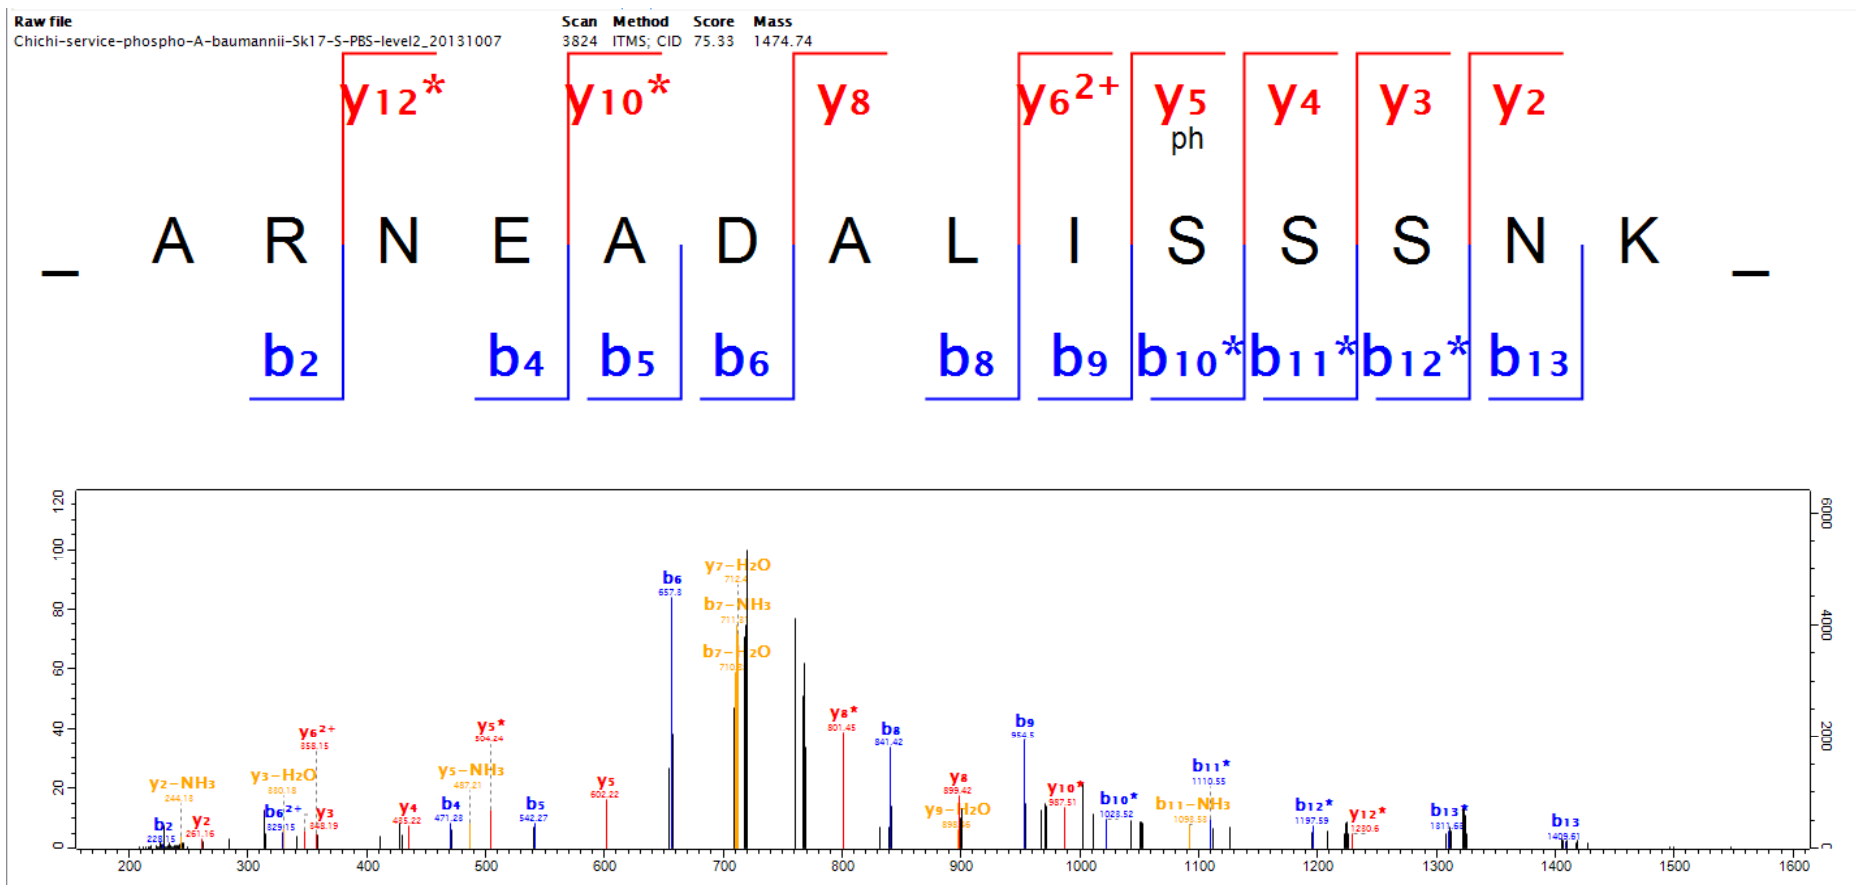

20-2

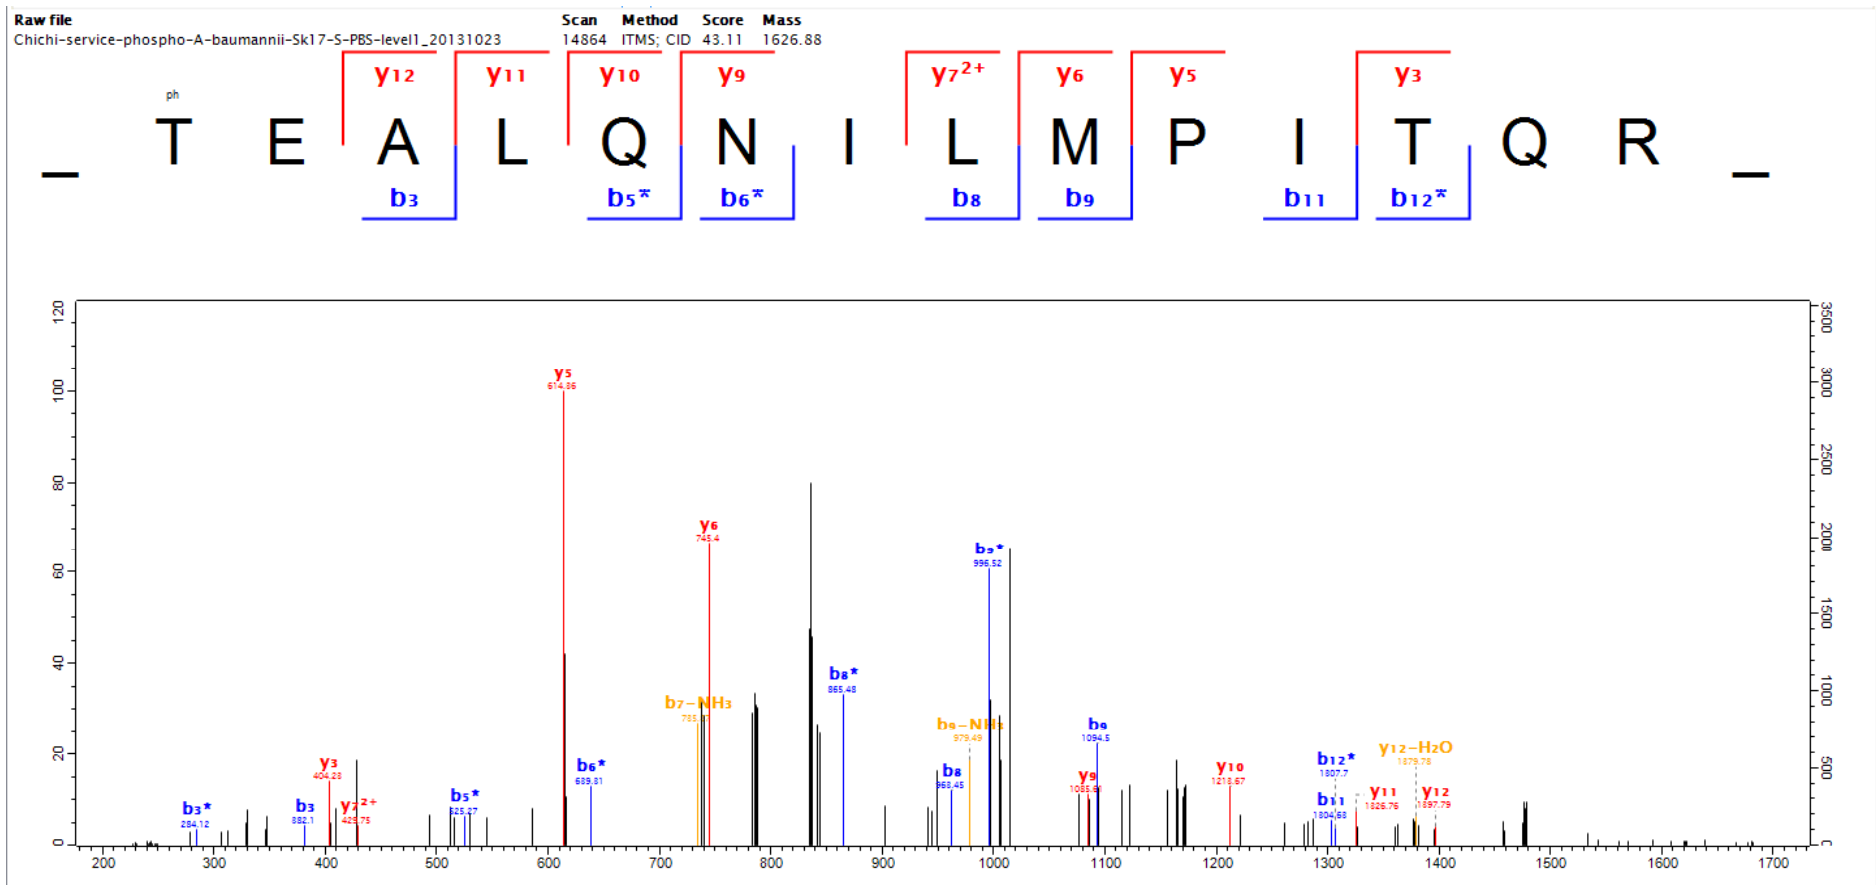

20-3

Scan number 13802 Raw file Chichi-service-phospho-A-baumannii-Sk17-S-PBS-level1\_20131023  
 Method ITMS; CID Pepti... 94.3

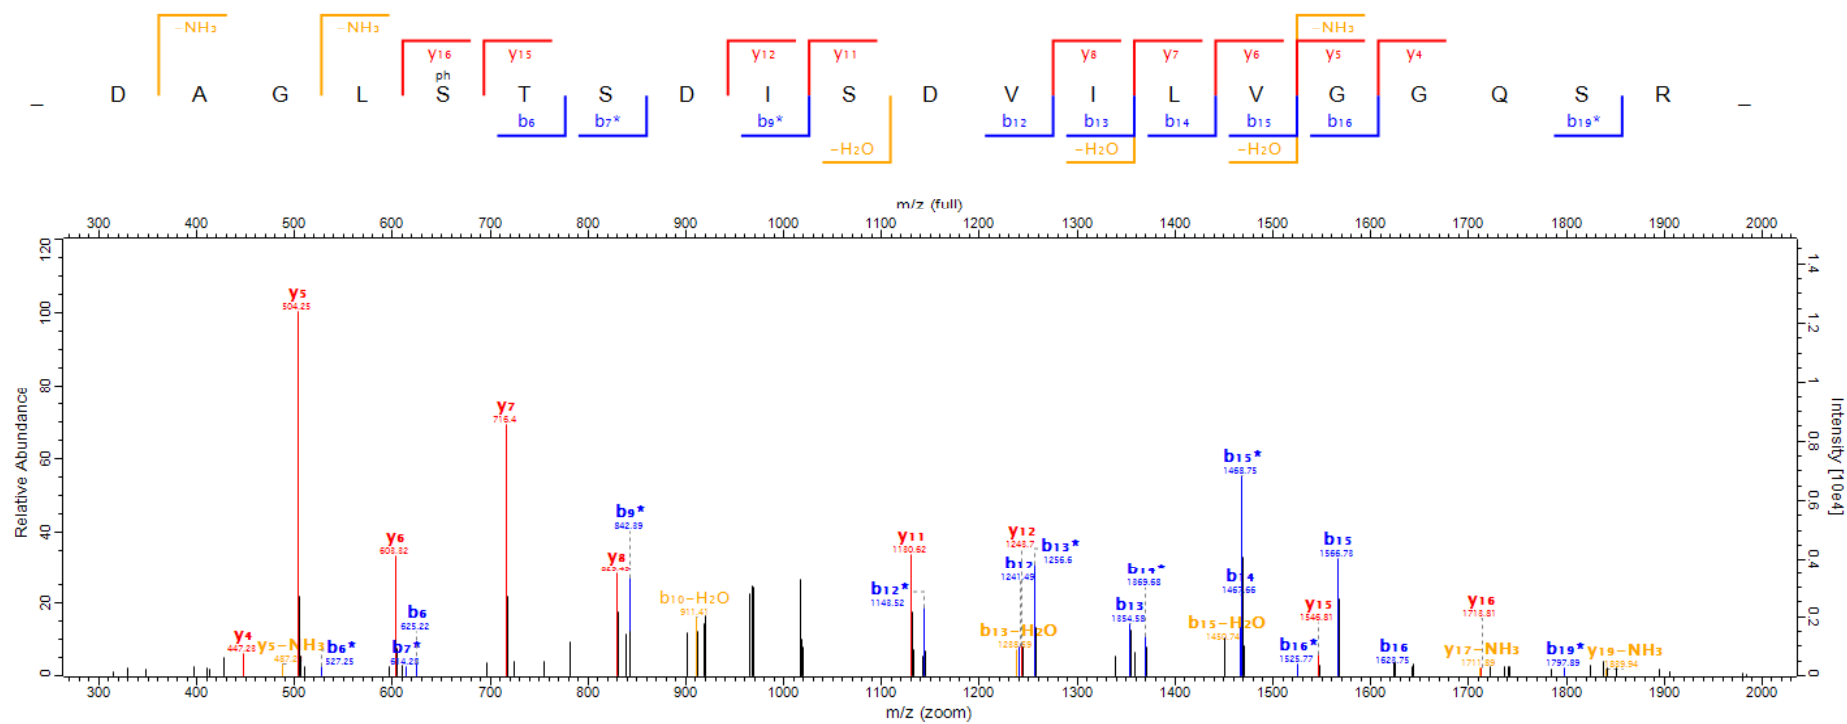

20-4

Scan number 13154 Raw file Chichi-service-phospho-A-baumannii-Sk17-5-PBS-level2\_20131007  
 Method ITMS: CID Pepti... 115.63

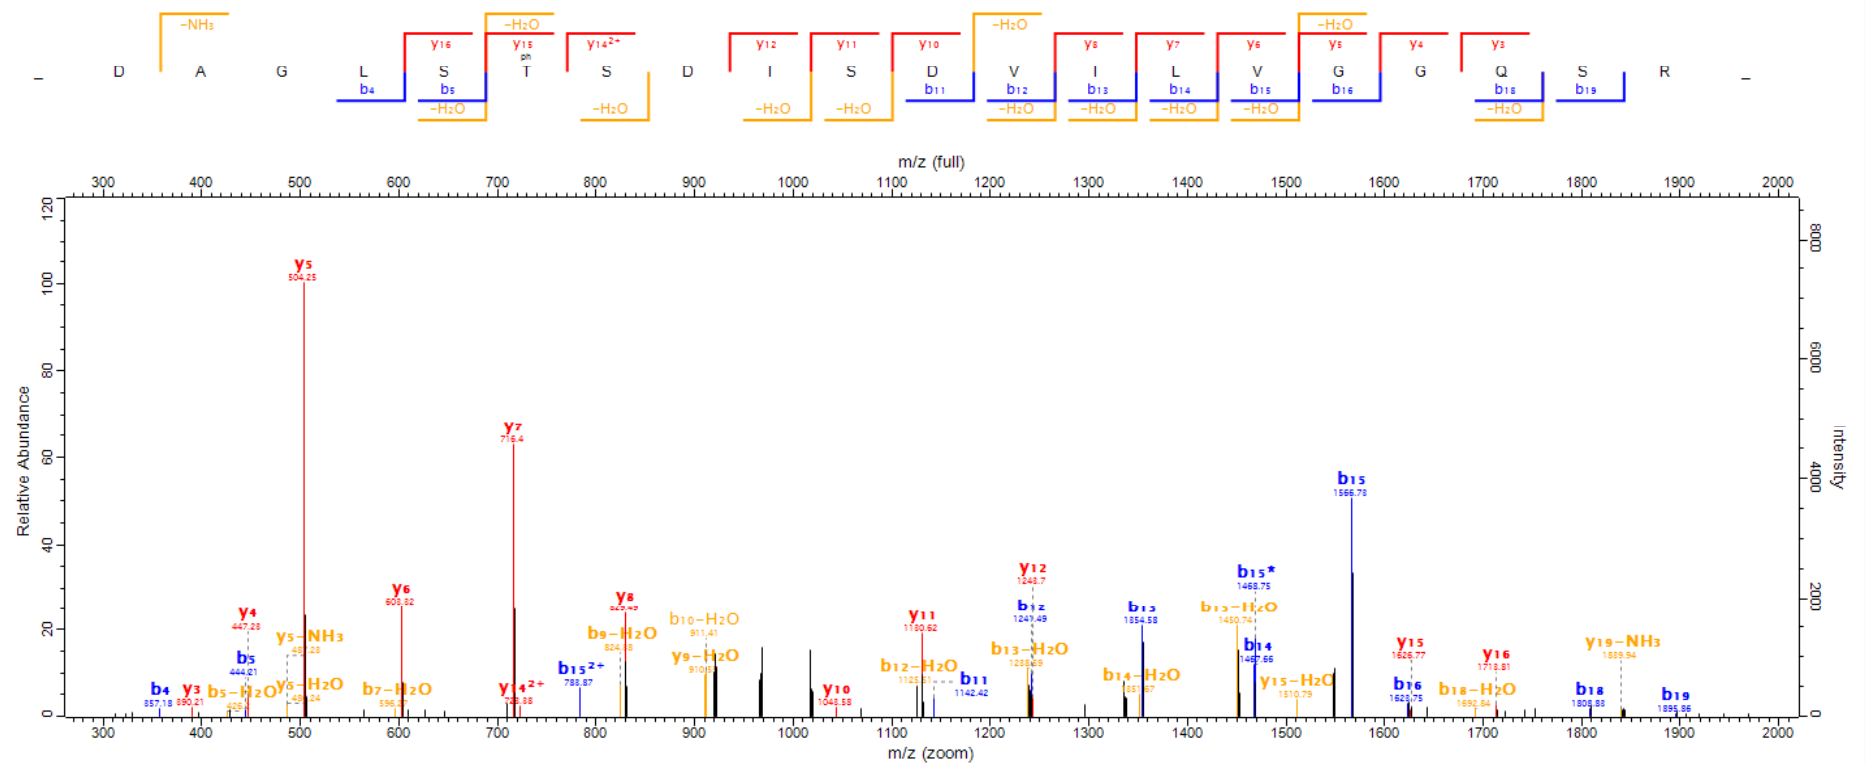



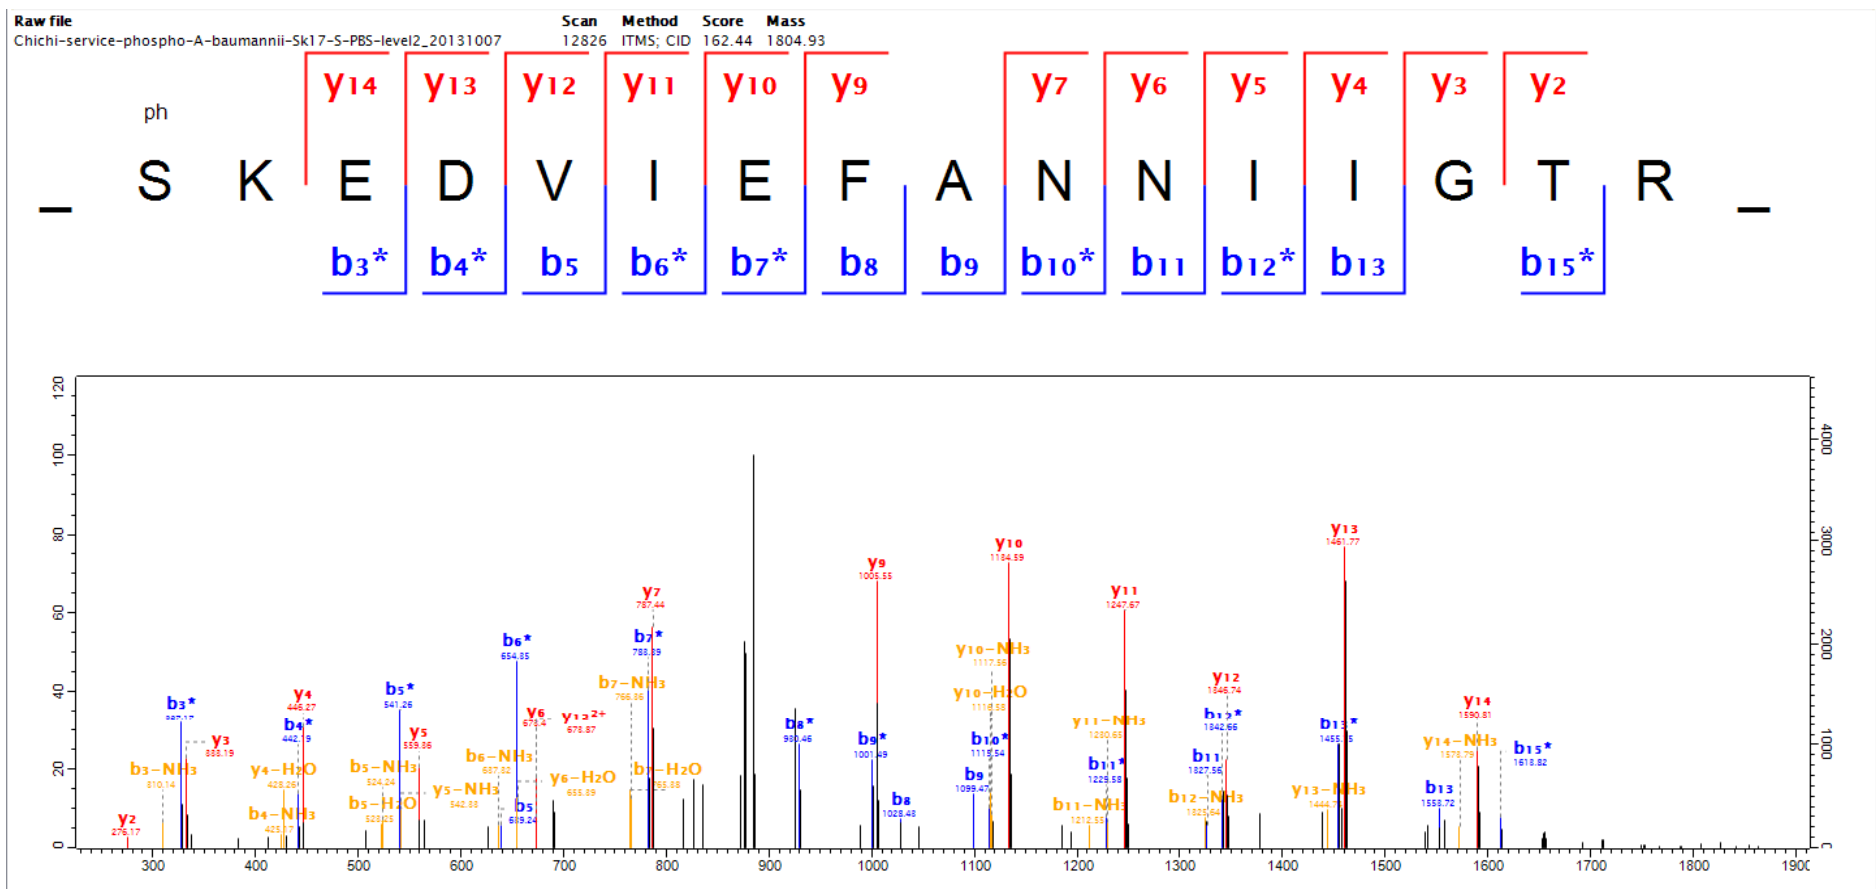

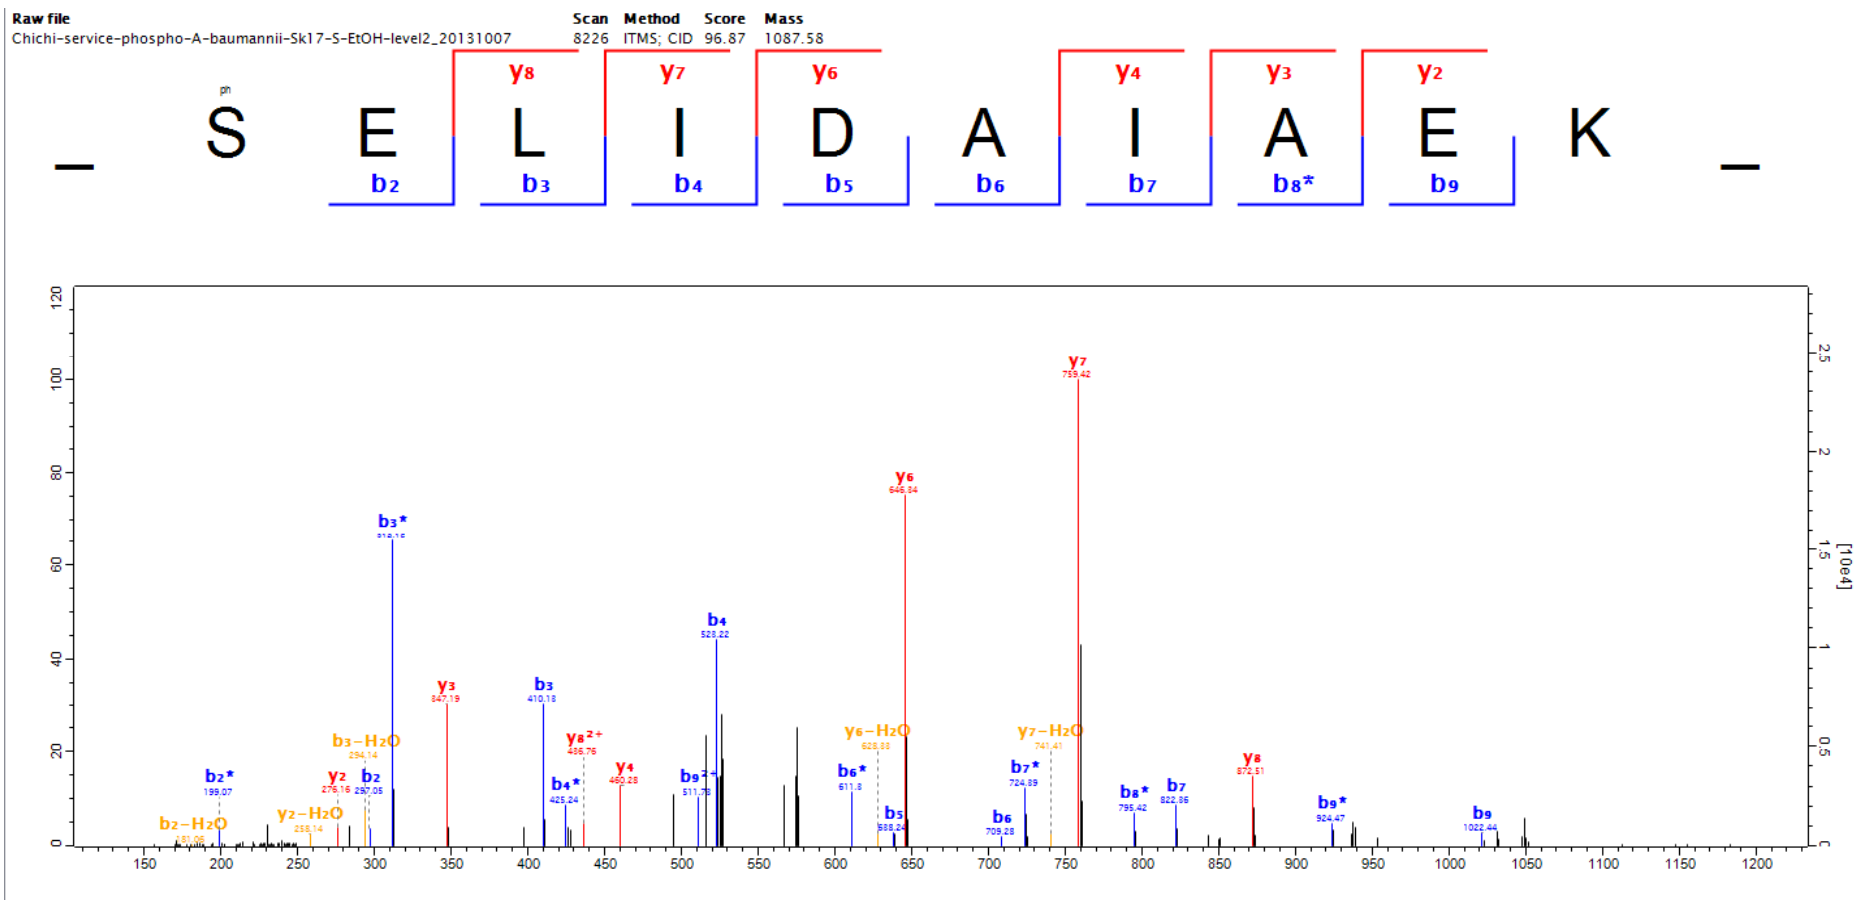

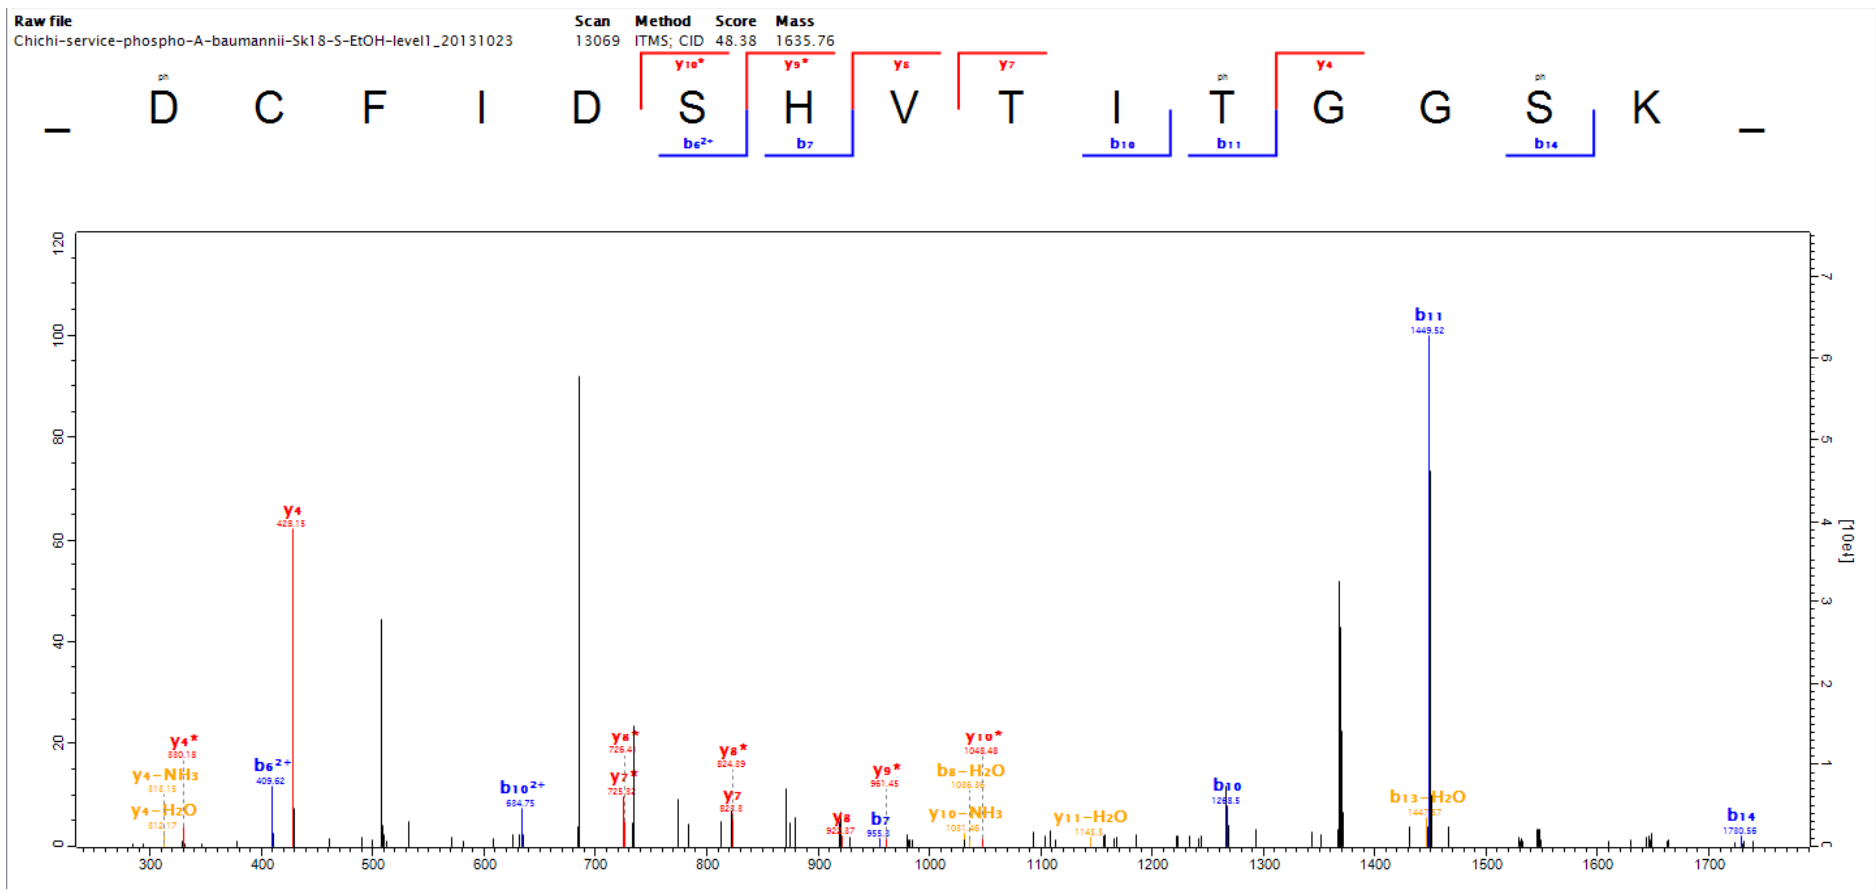

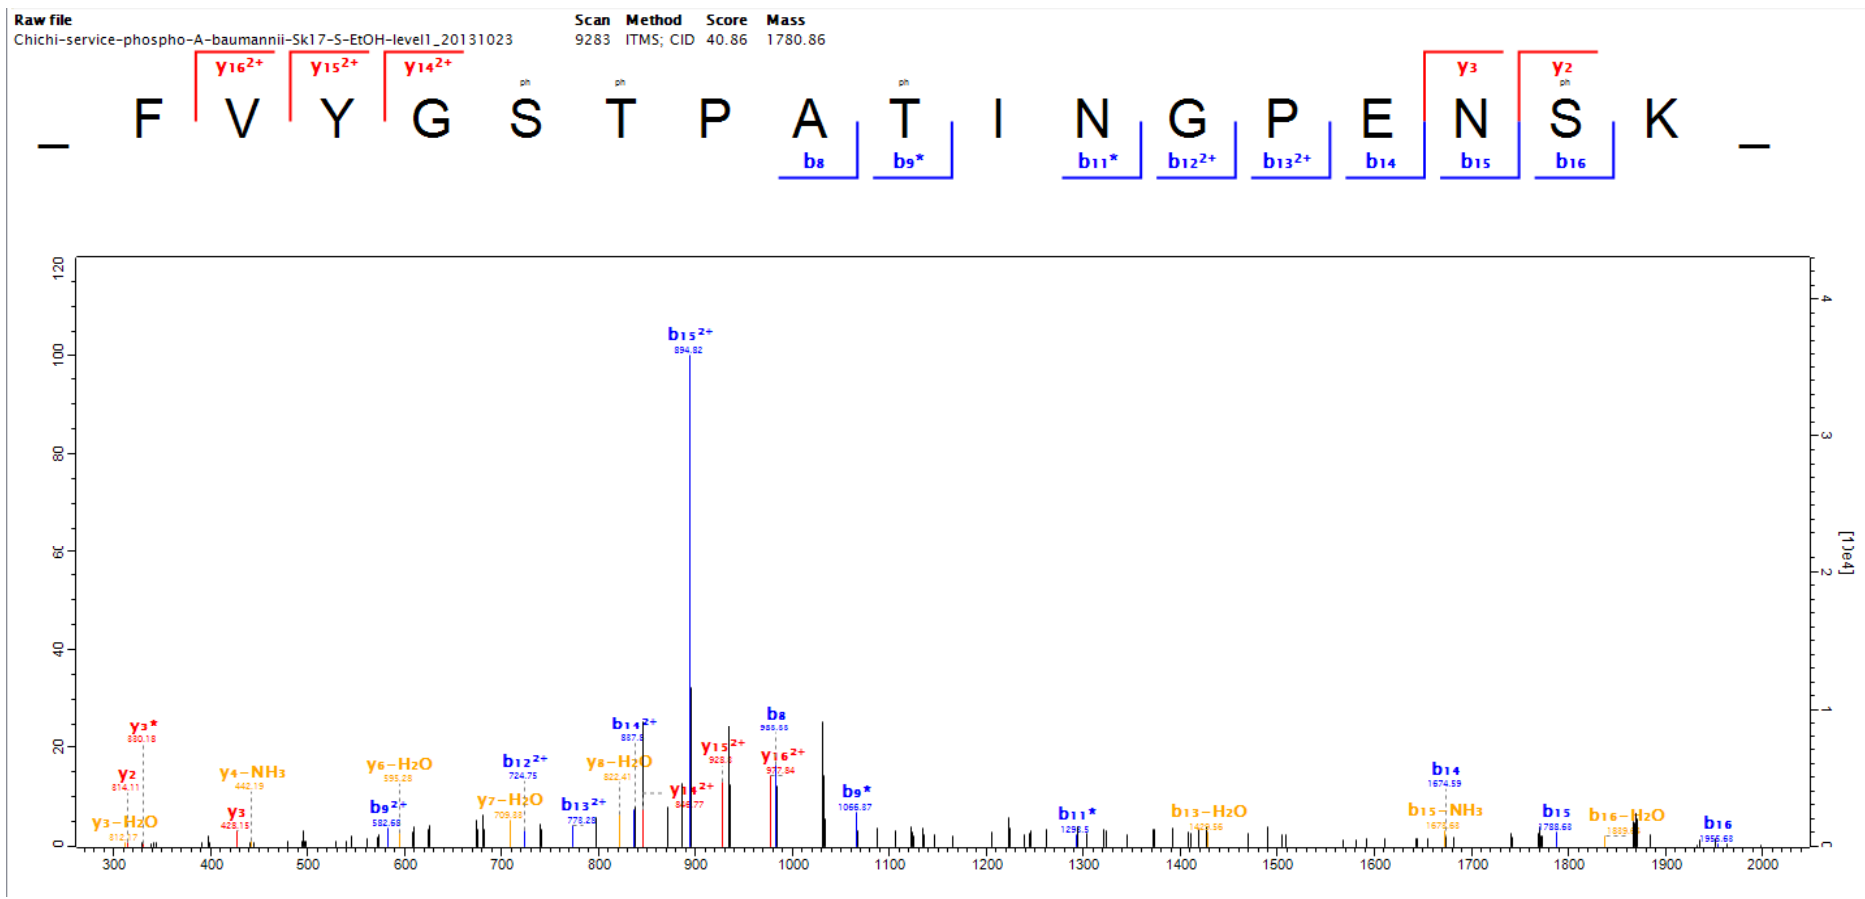

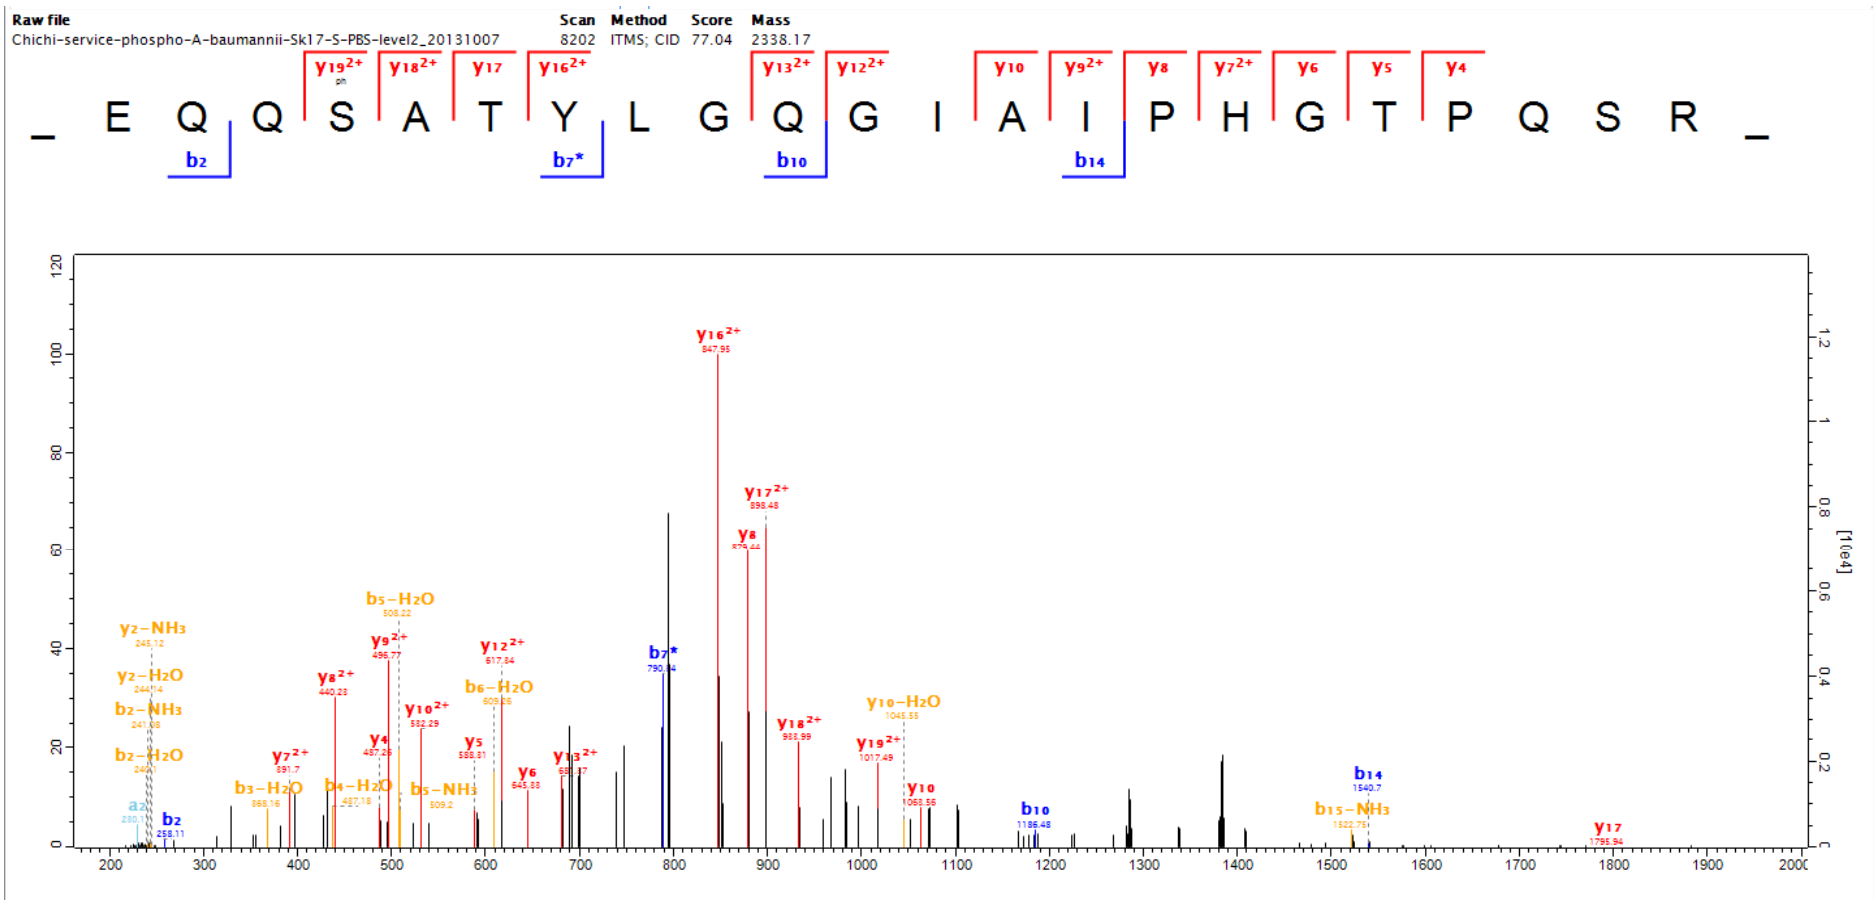

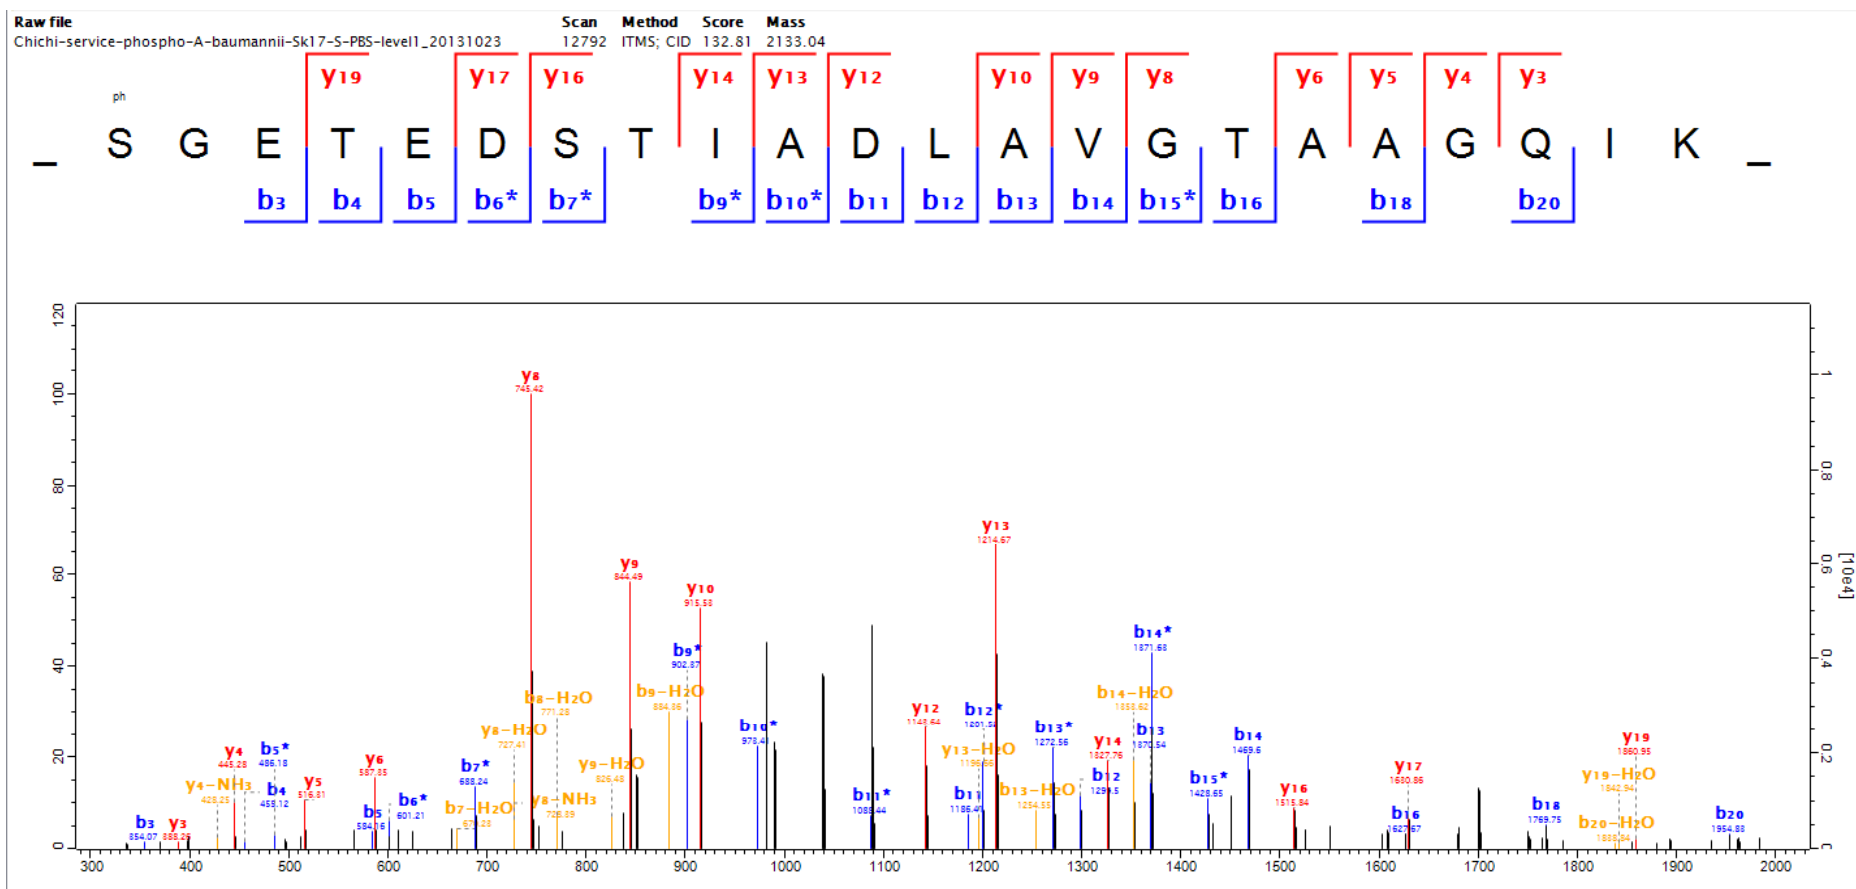

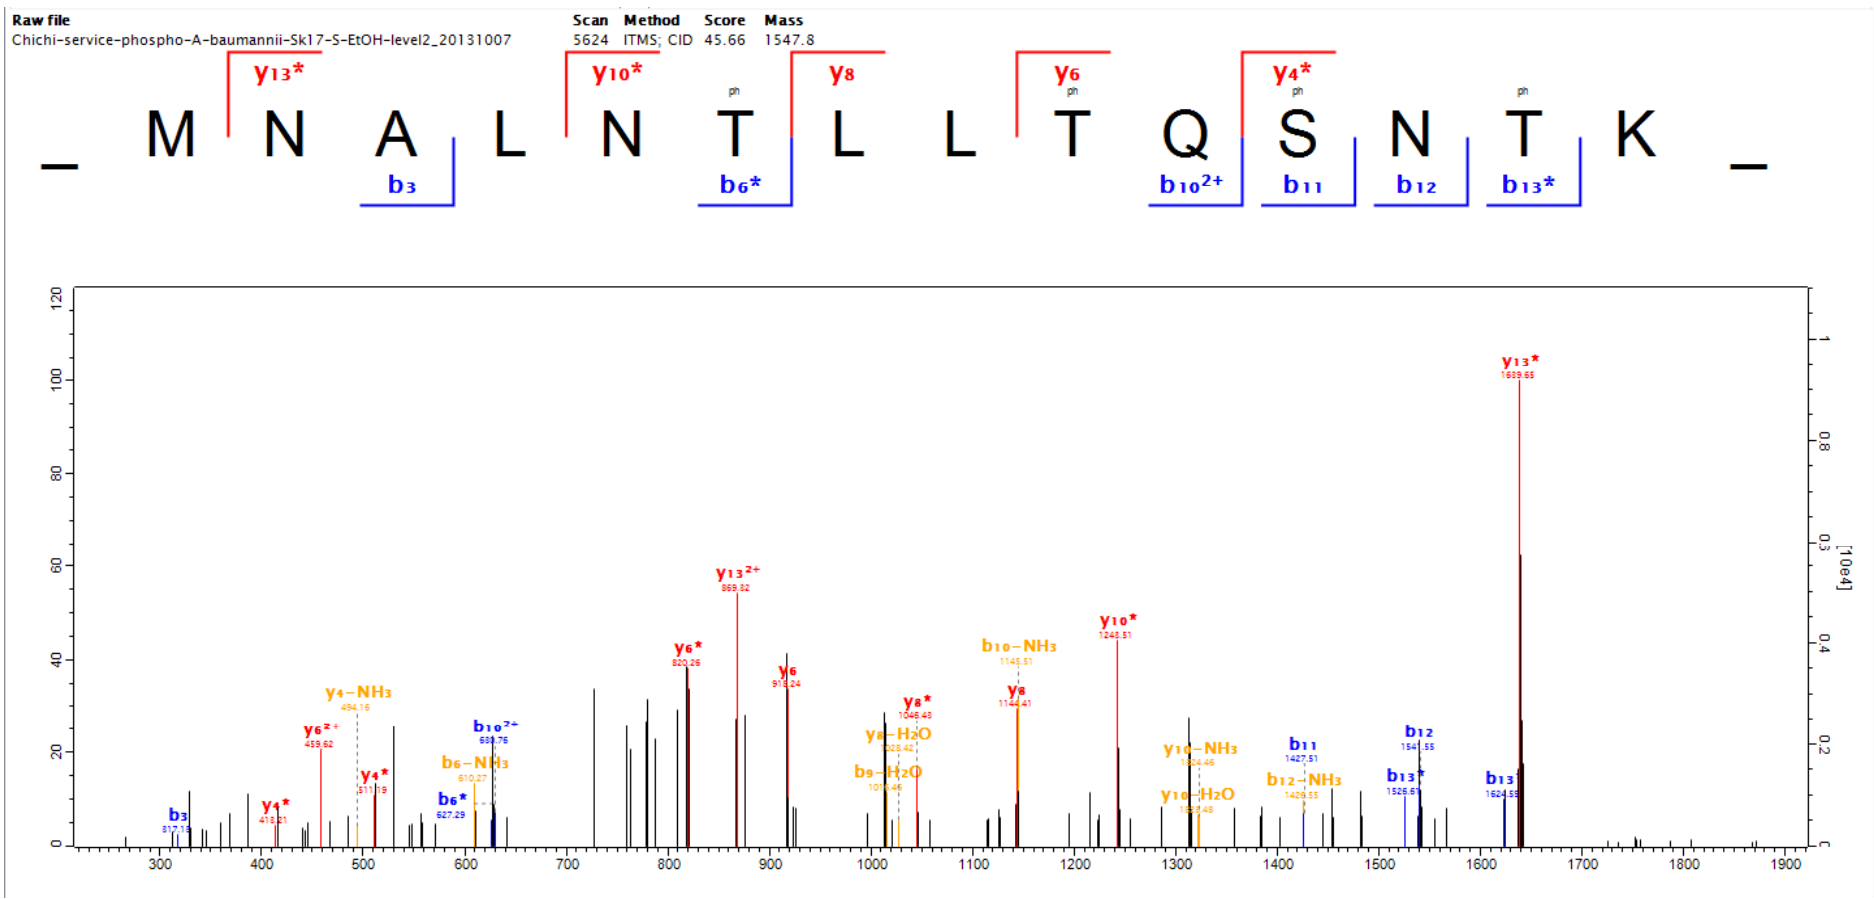

28-1

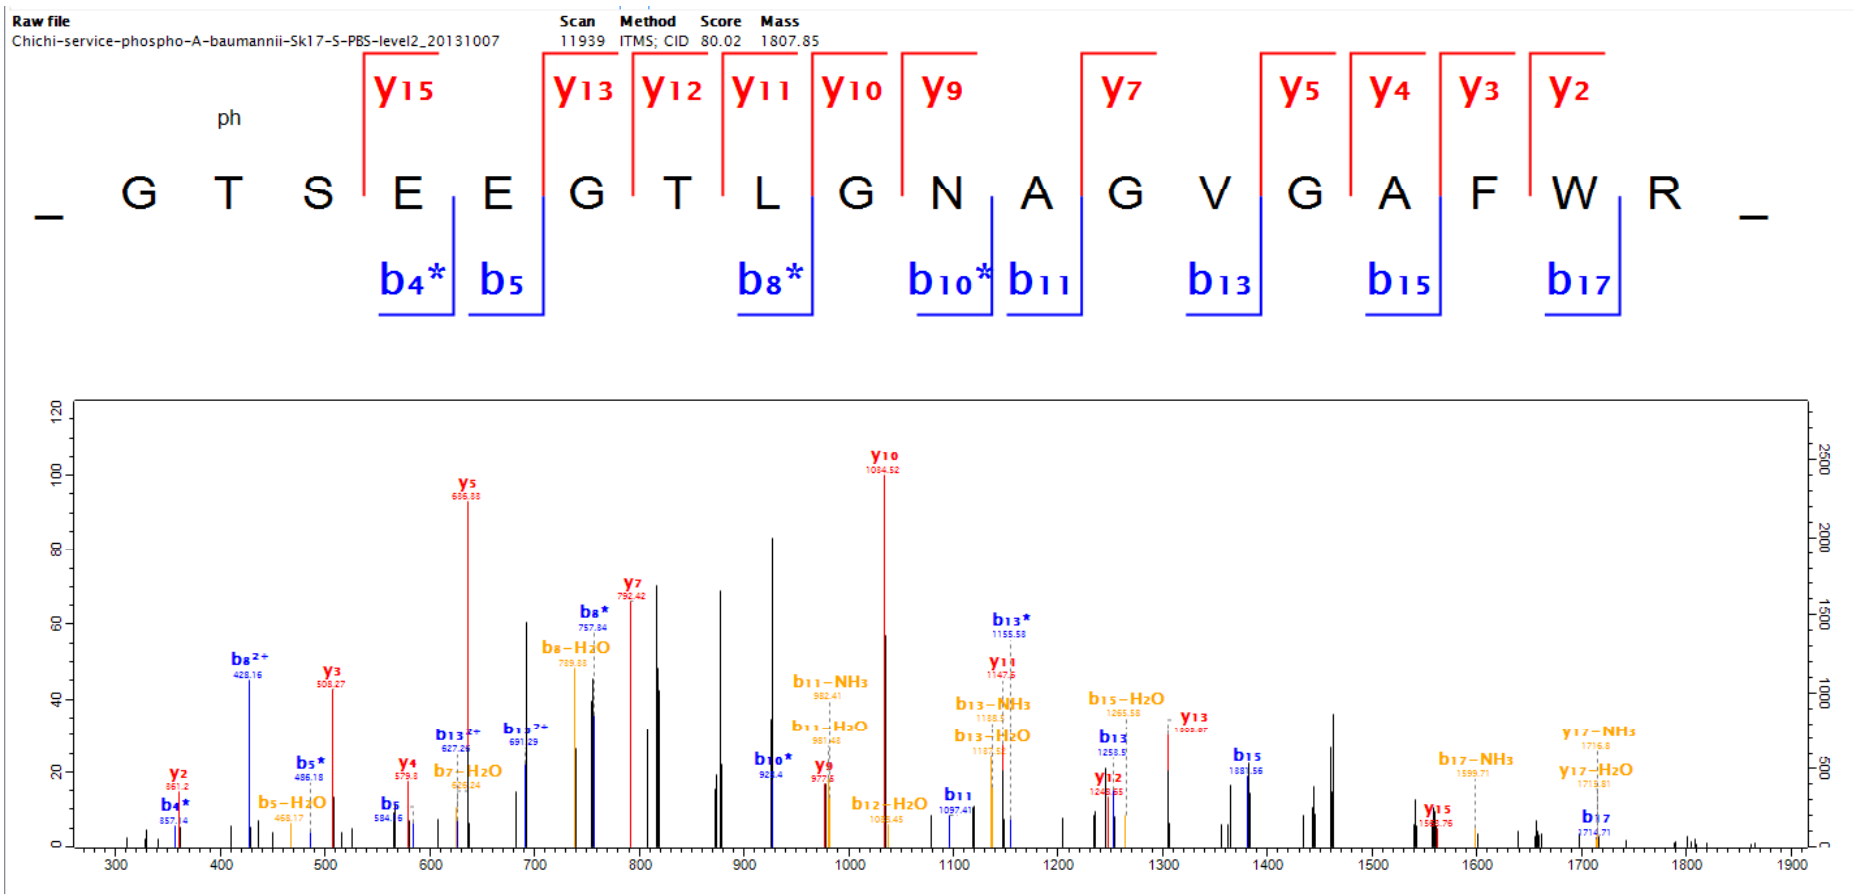



28-2

Scan number 12178 Raw file Chichi-service-phospho-A-baumannii-Sk18-S-EtOH-level2\_20131007  
 Method ITMS: CID Pepti... 77.56

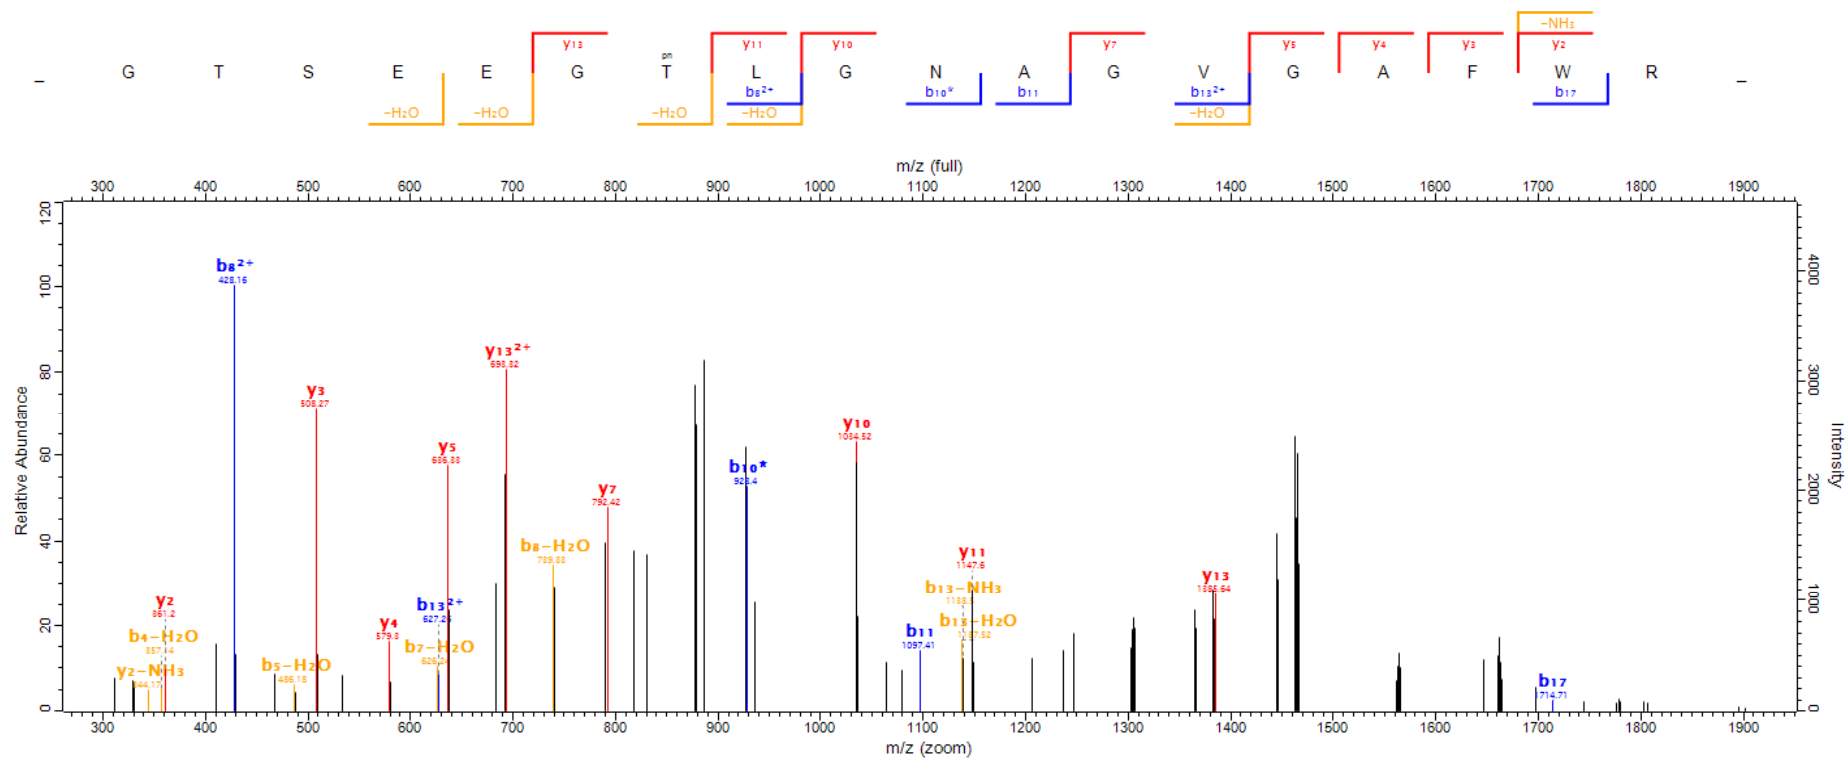

28-3

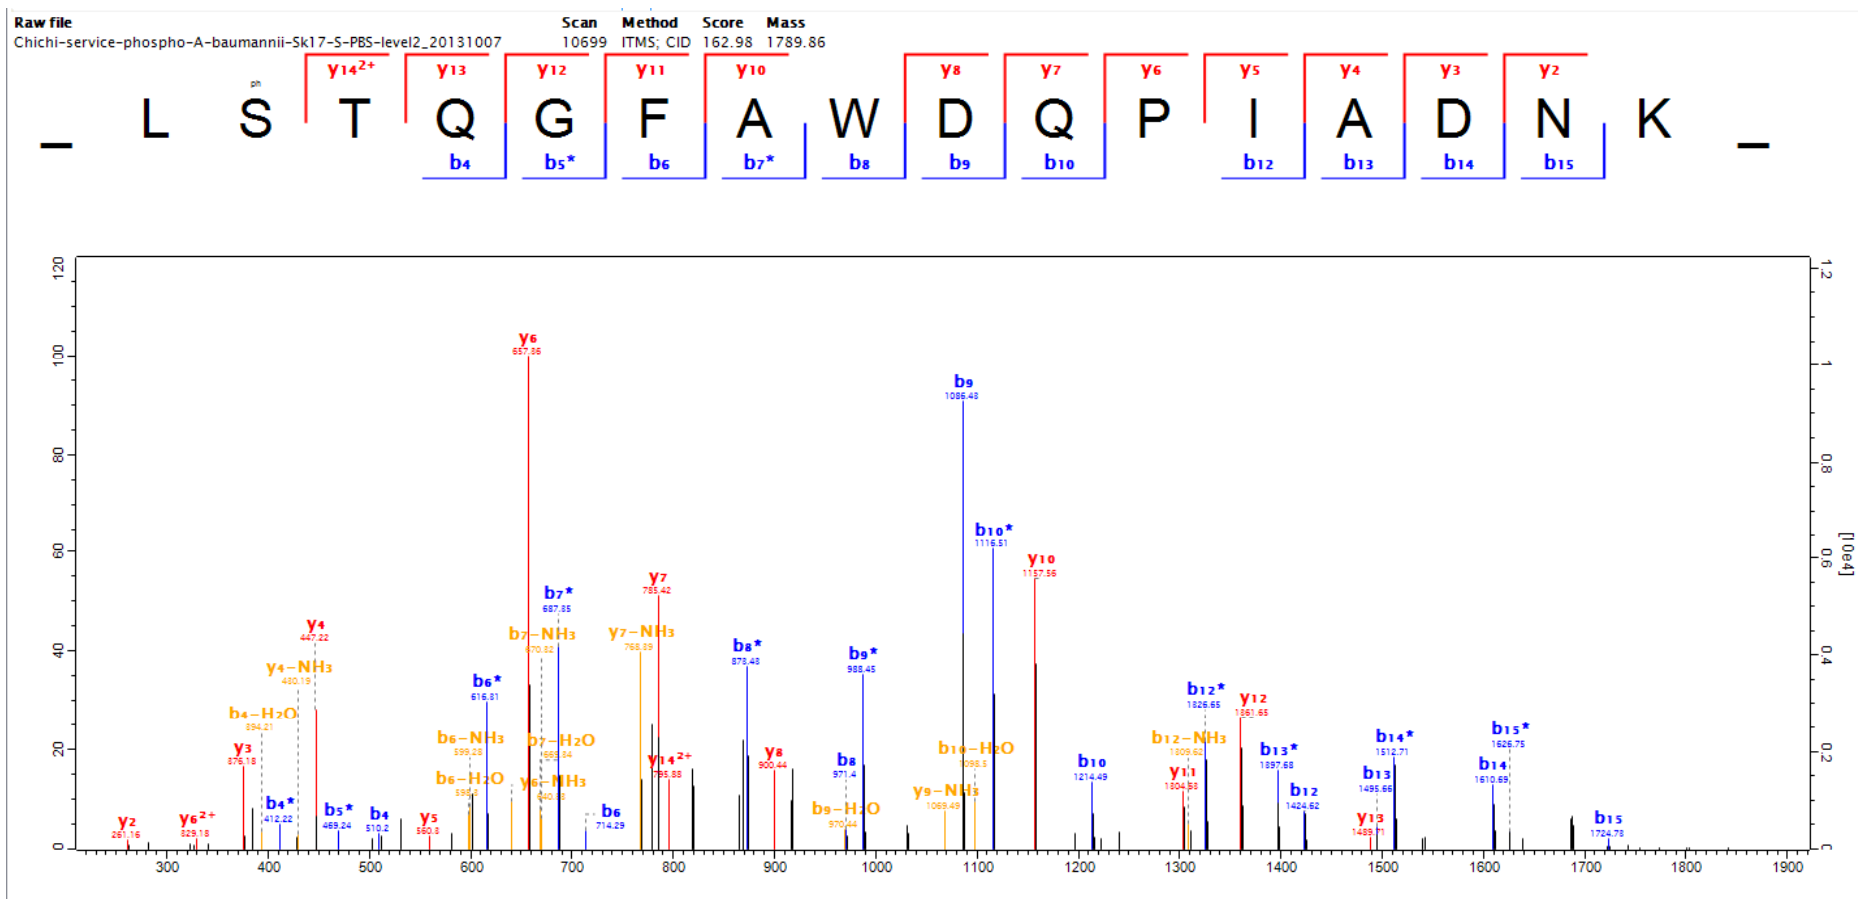

28-4

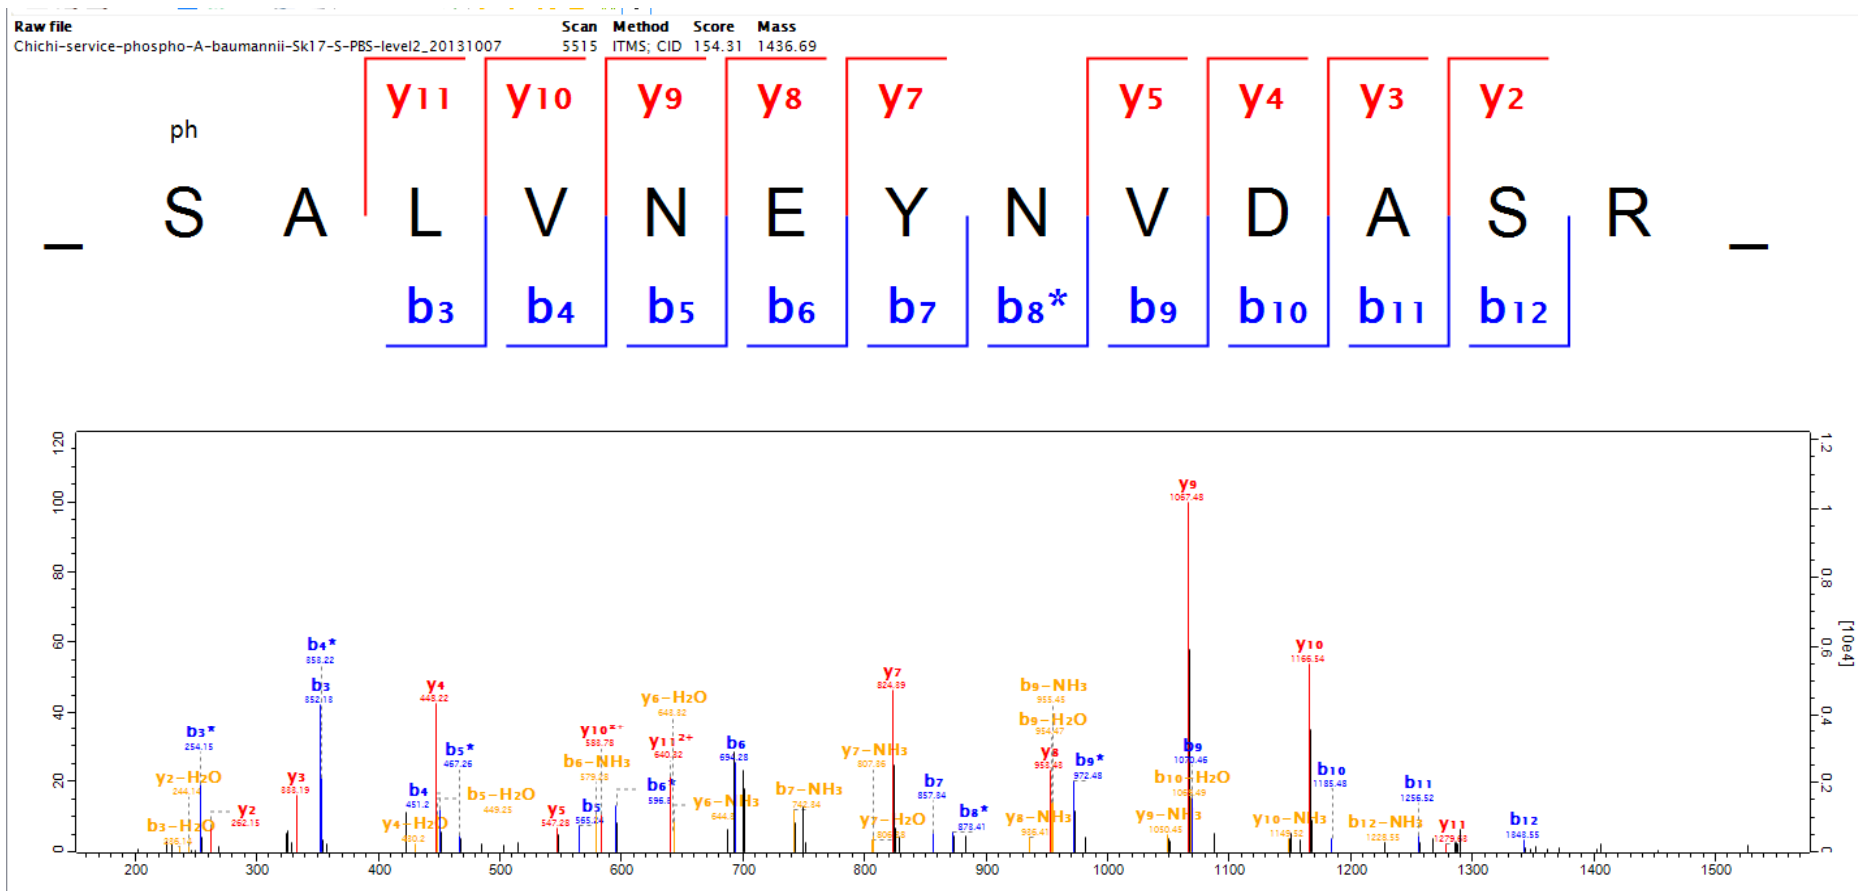

28-5

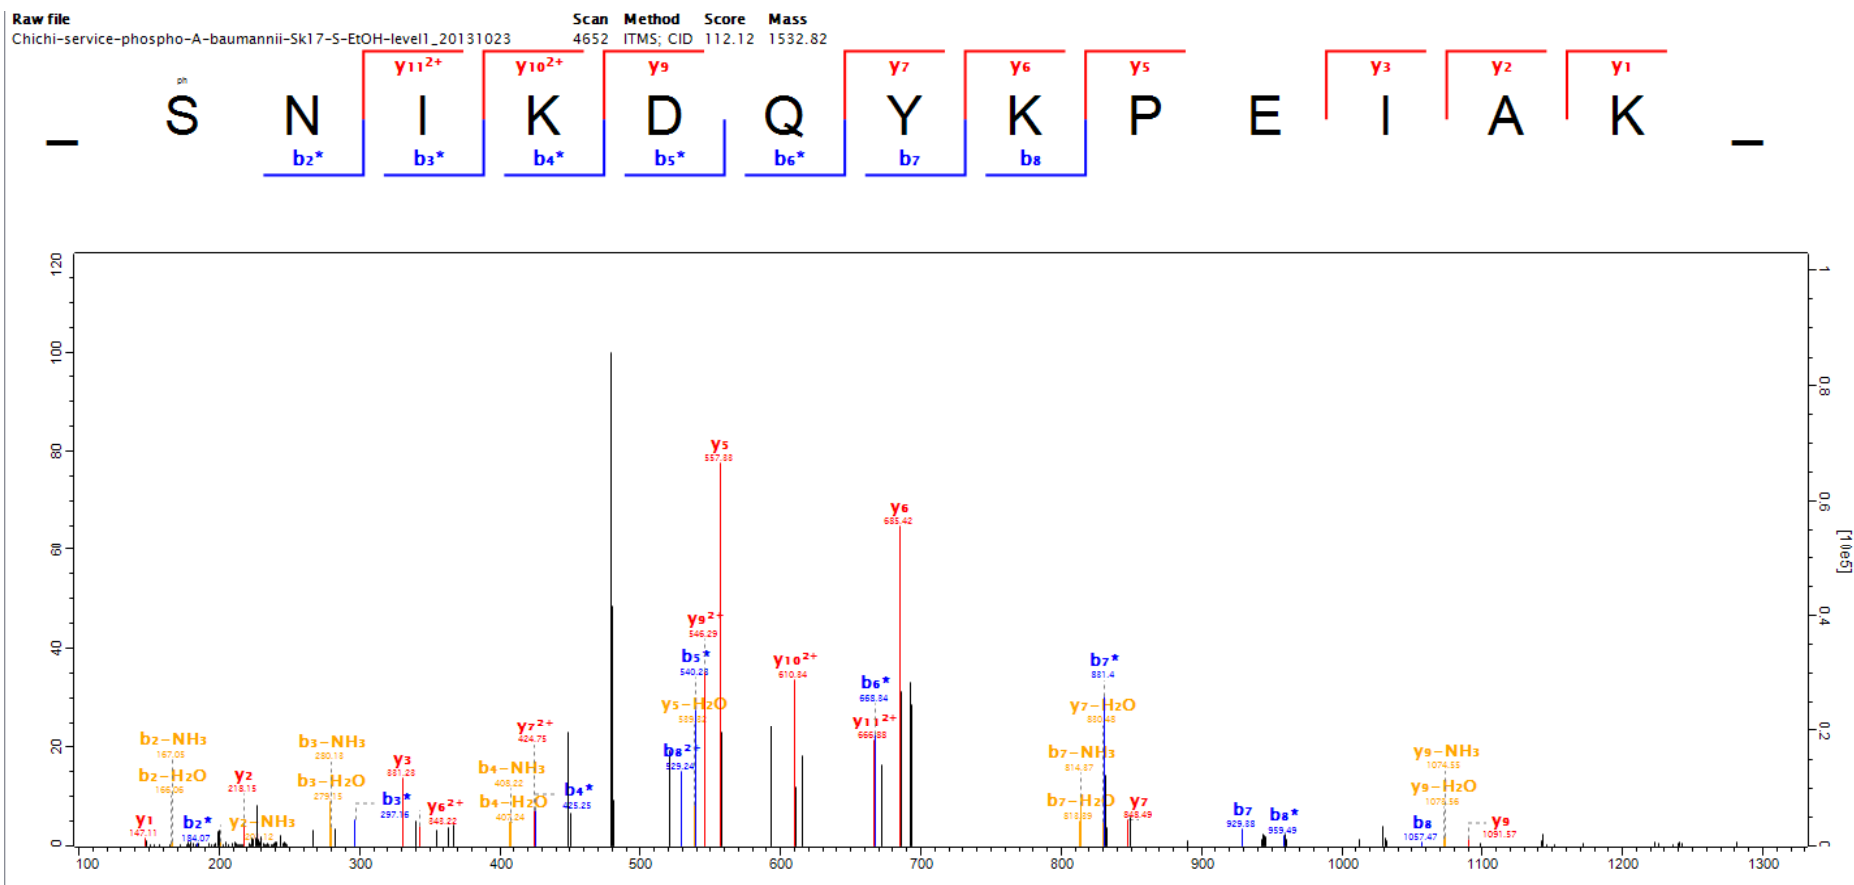

28-6

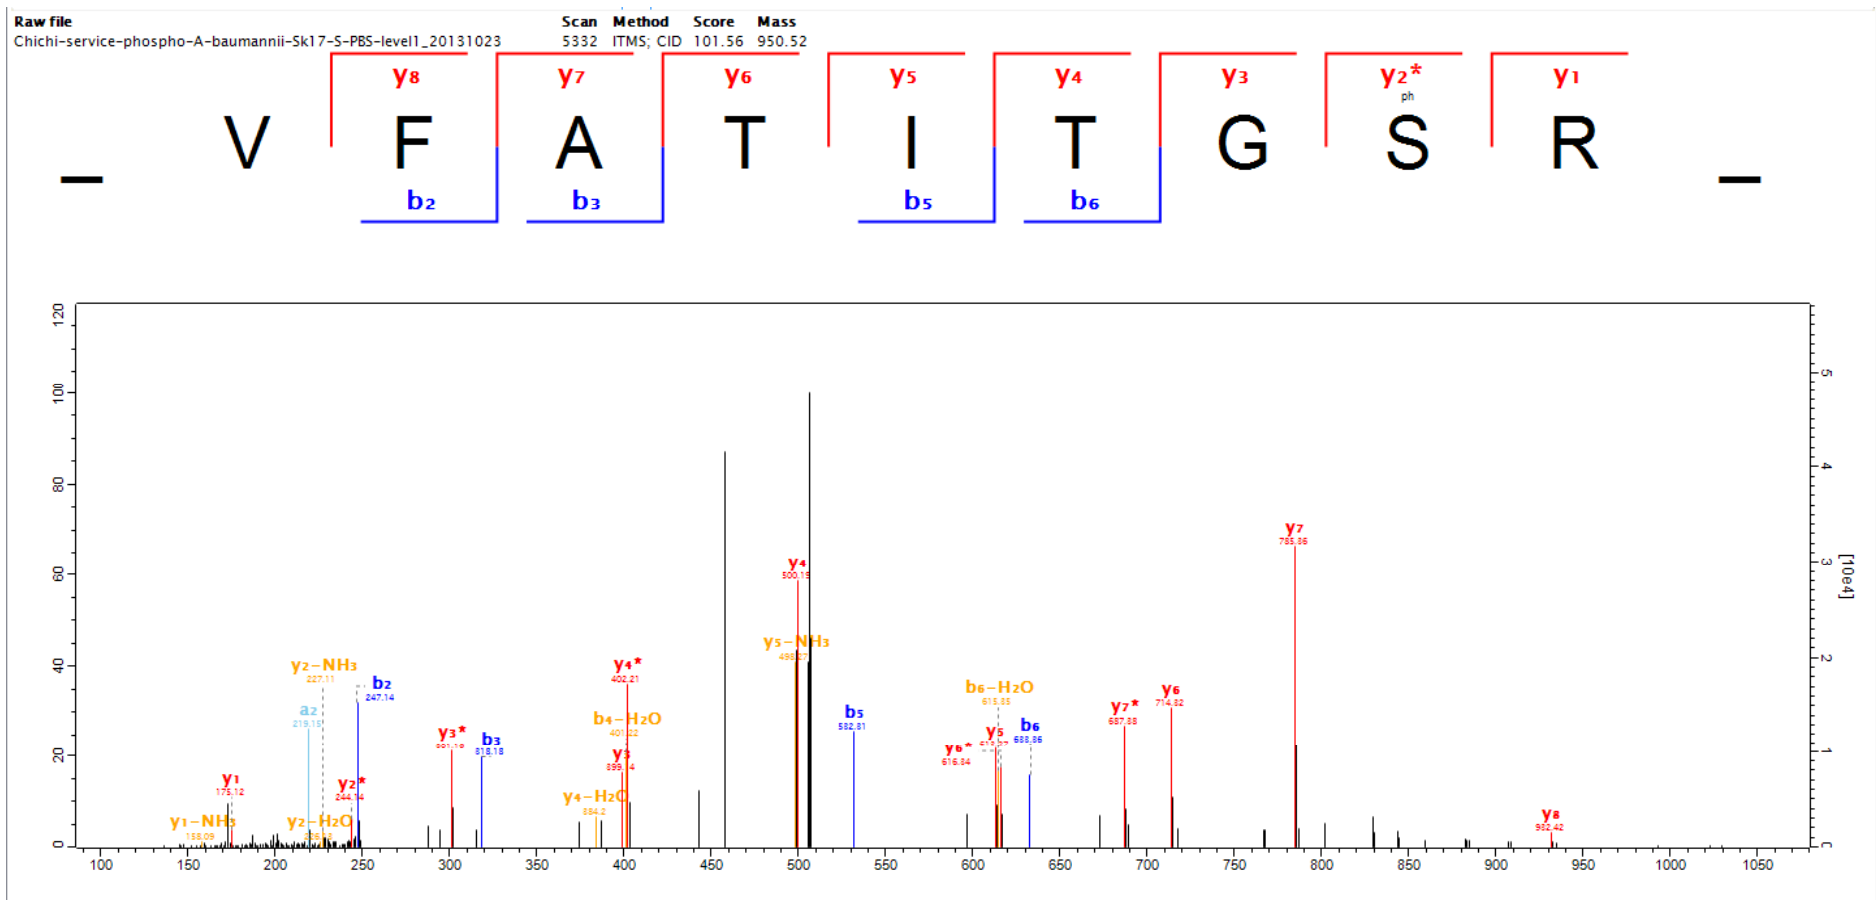

28-7

Scan number 6105 Raw file Chichi-service-phospho-A-baumannii-Sk17-5-EtOH-level1\_20131023  
Method ITMS: CID Pepti... 122.7

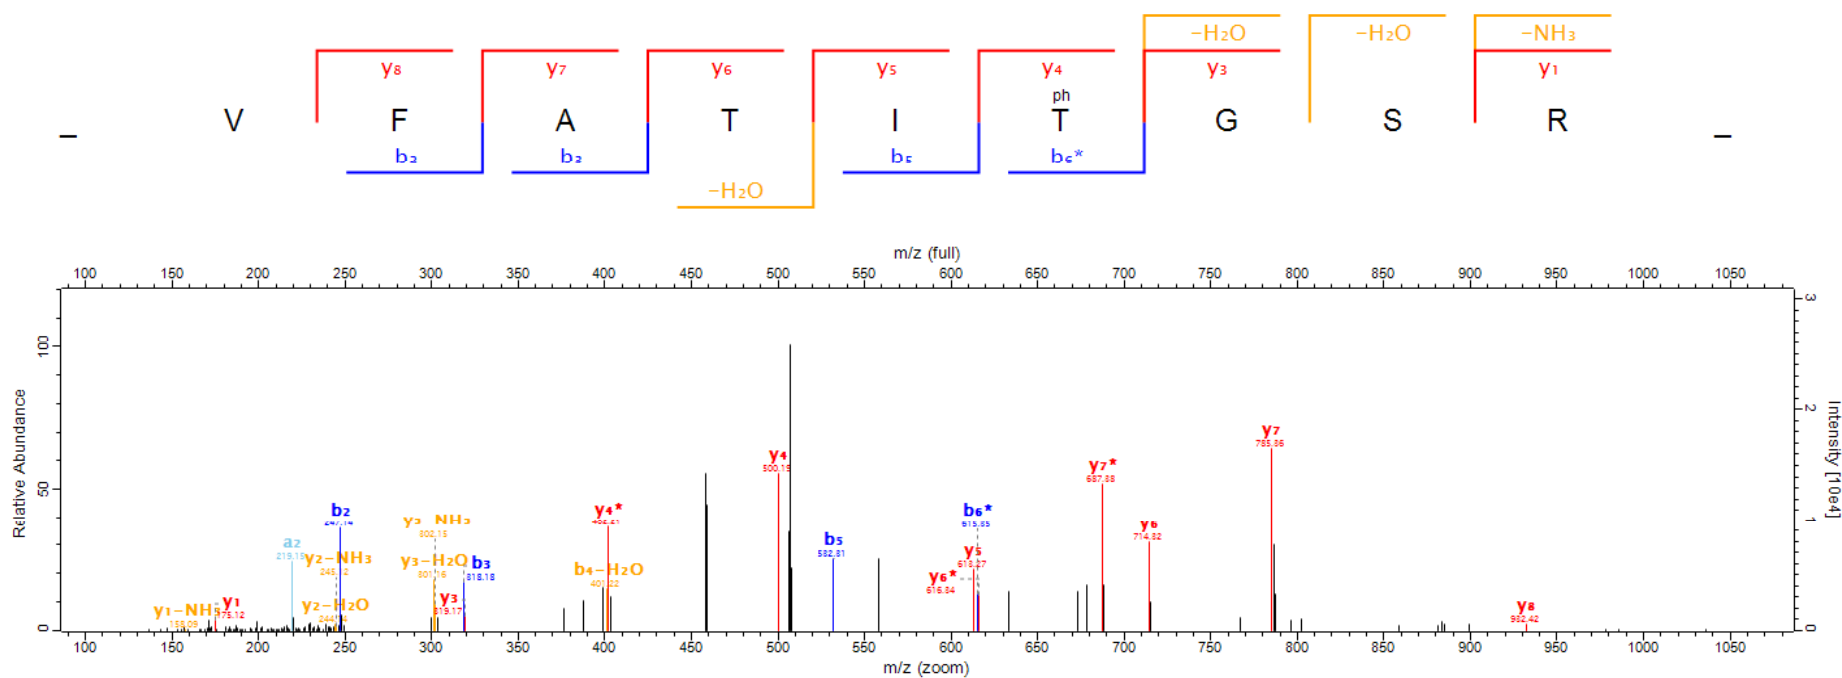

28-8

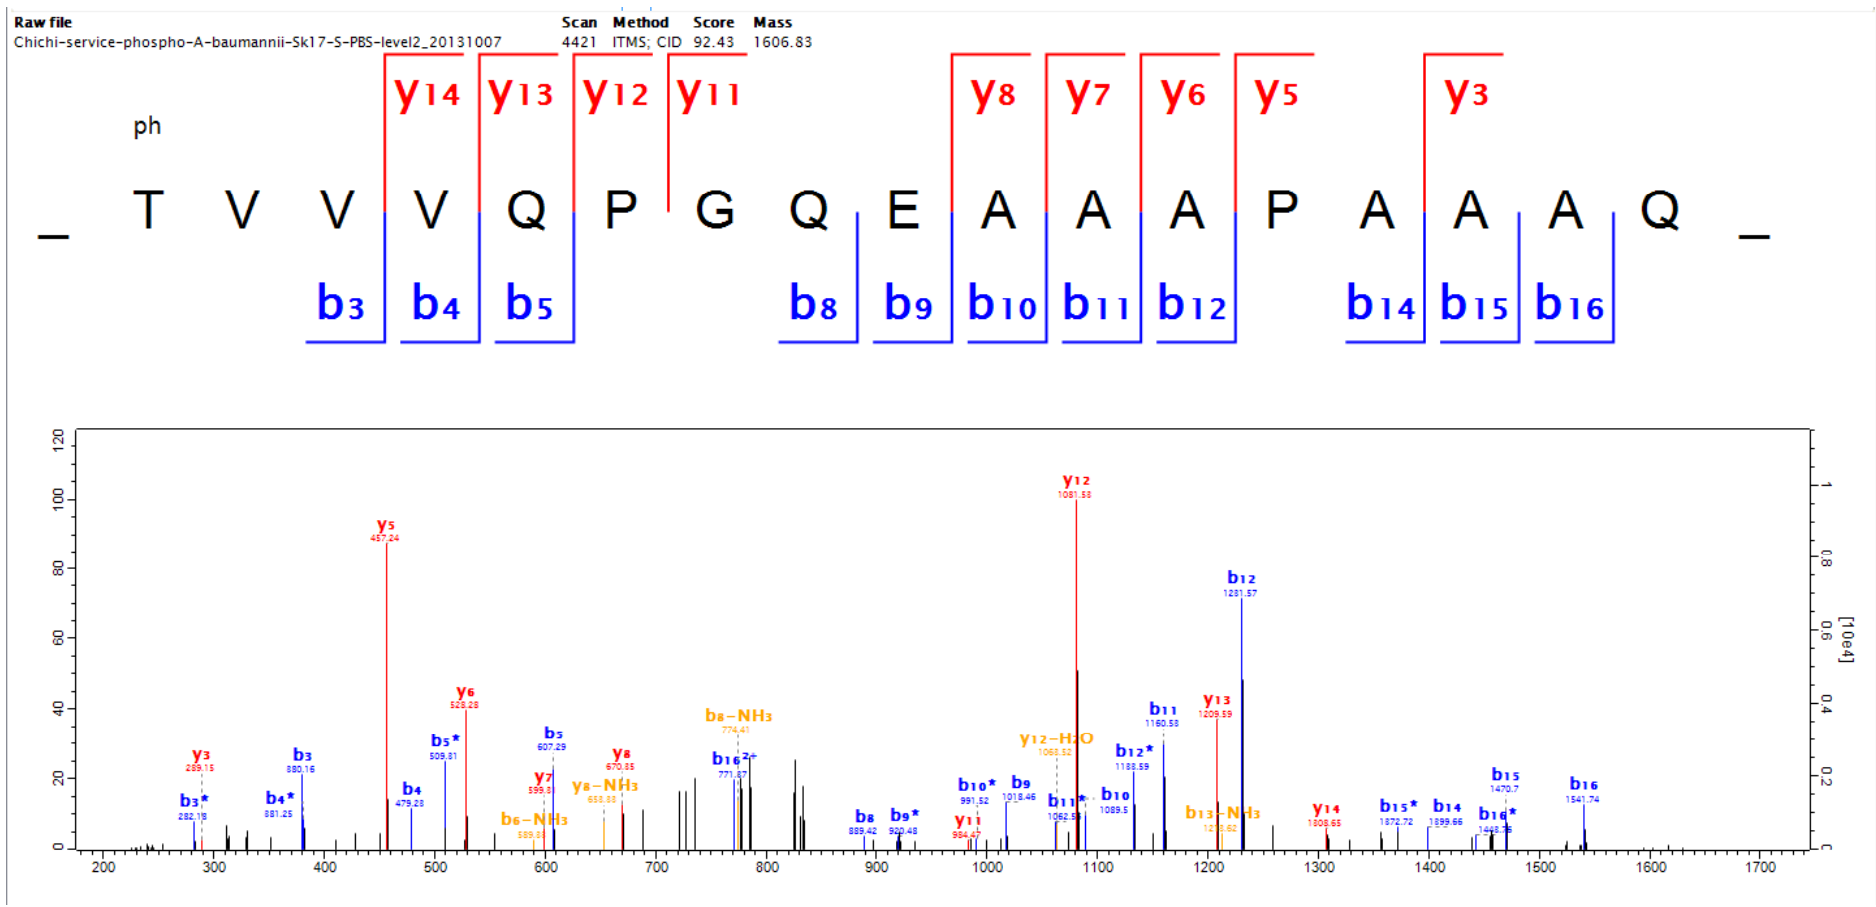

28-9

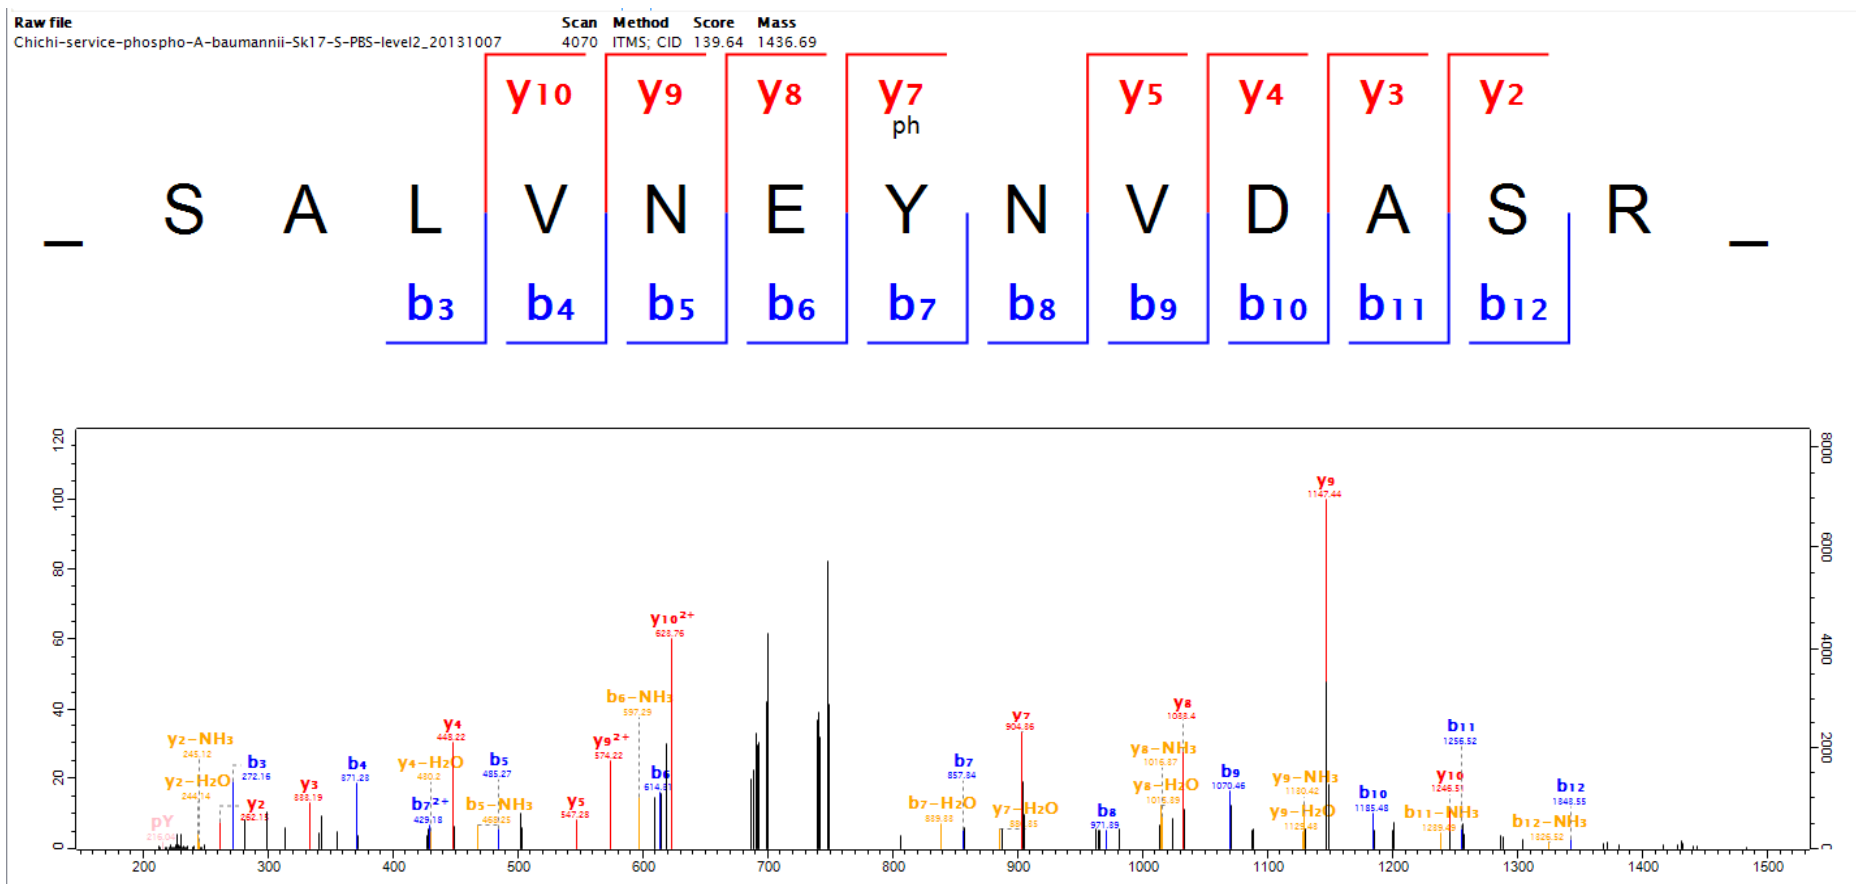



28-10

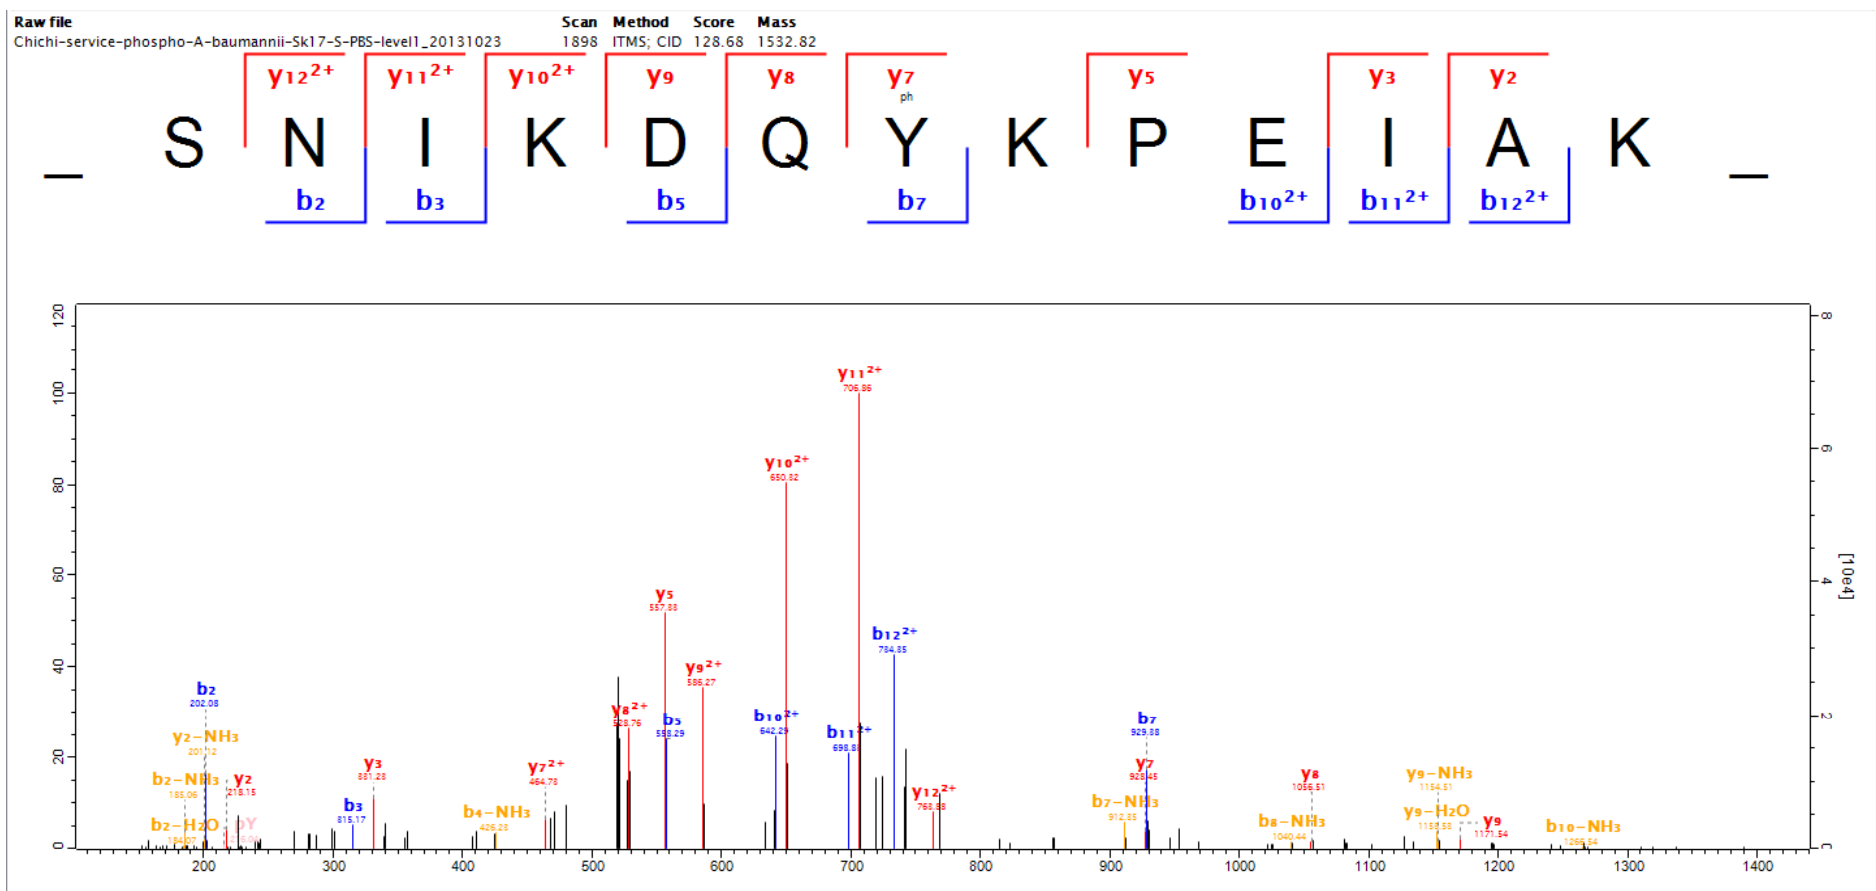

28-11

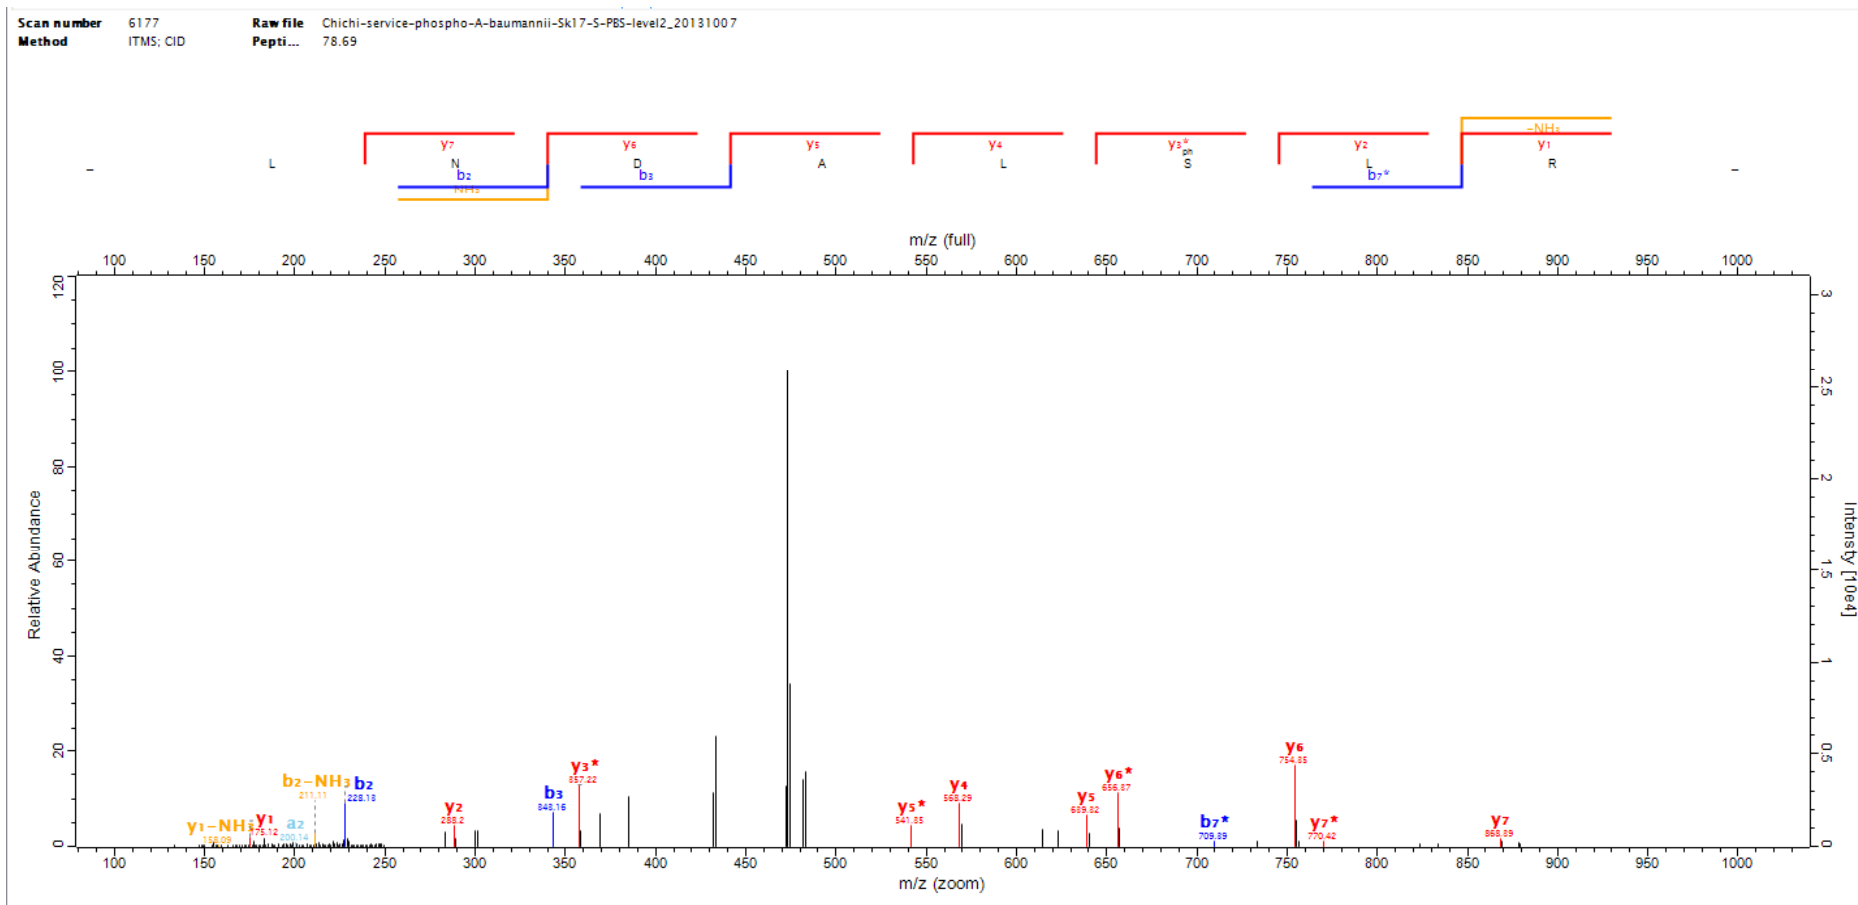

29-1

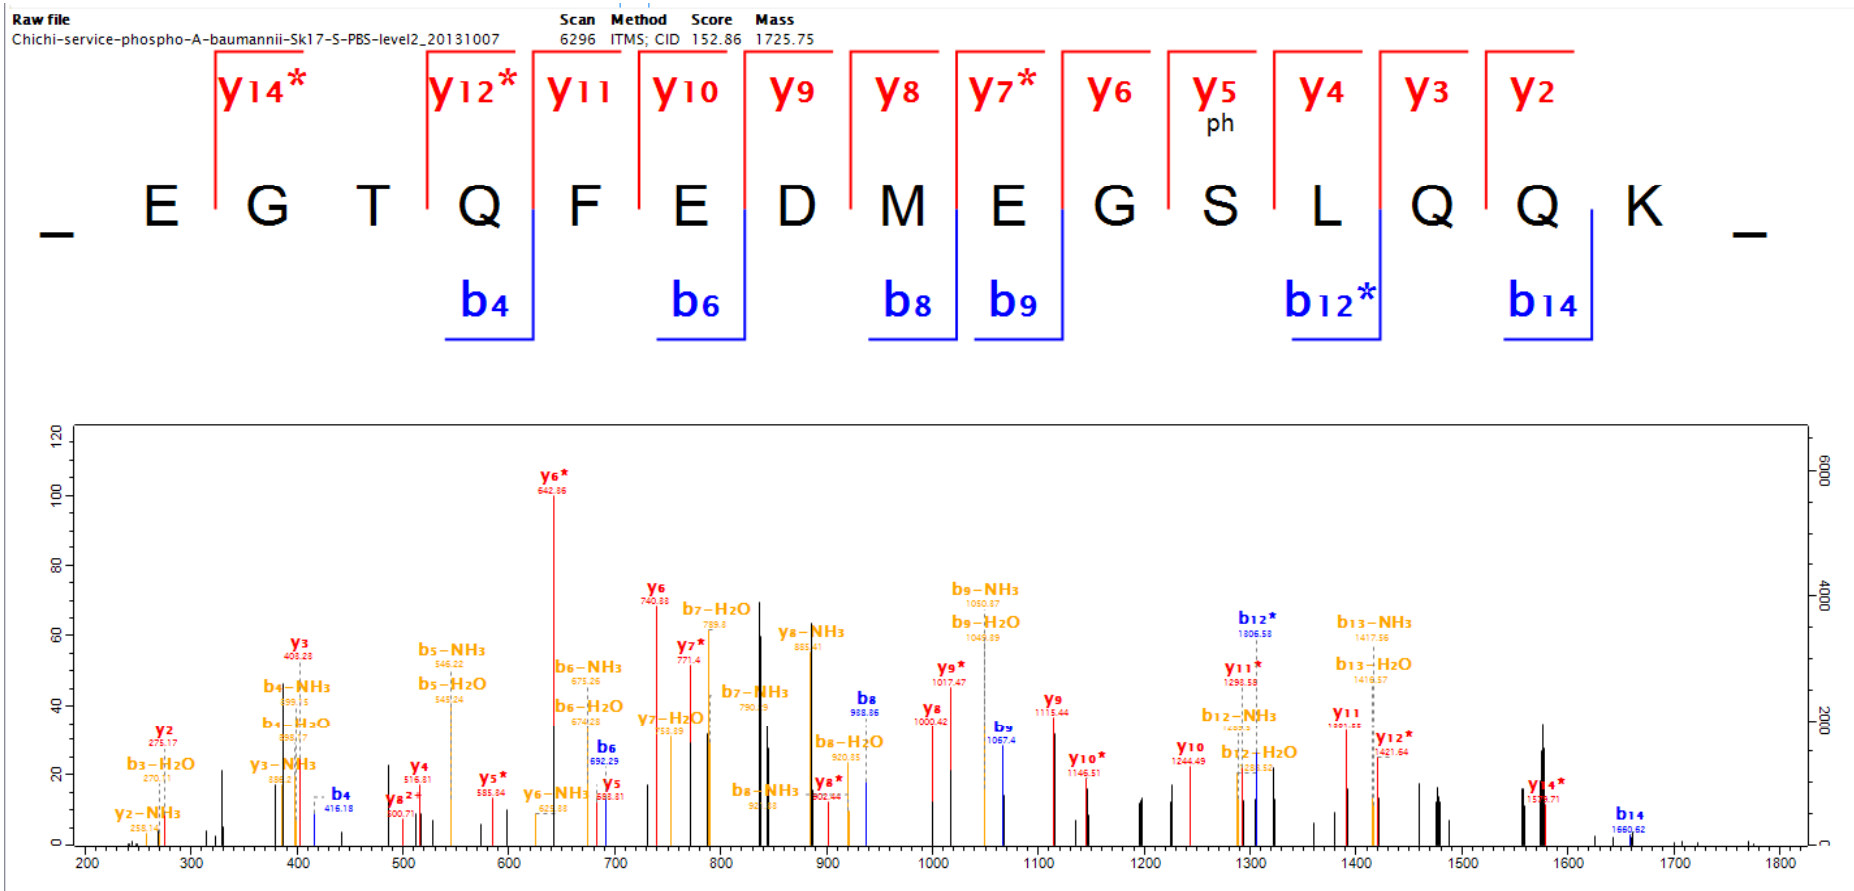

29-2

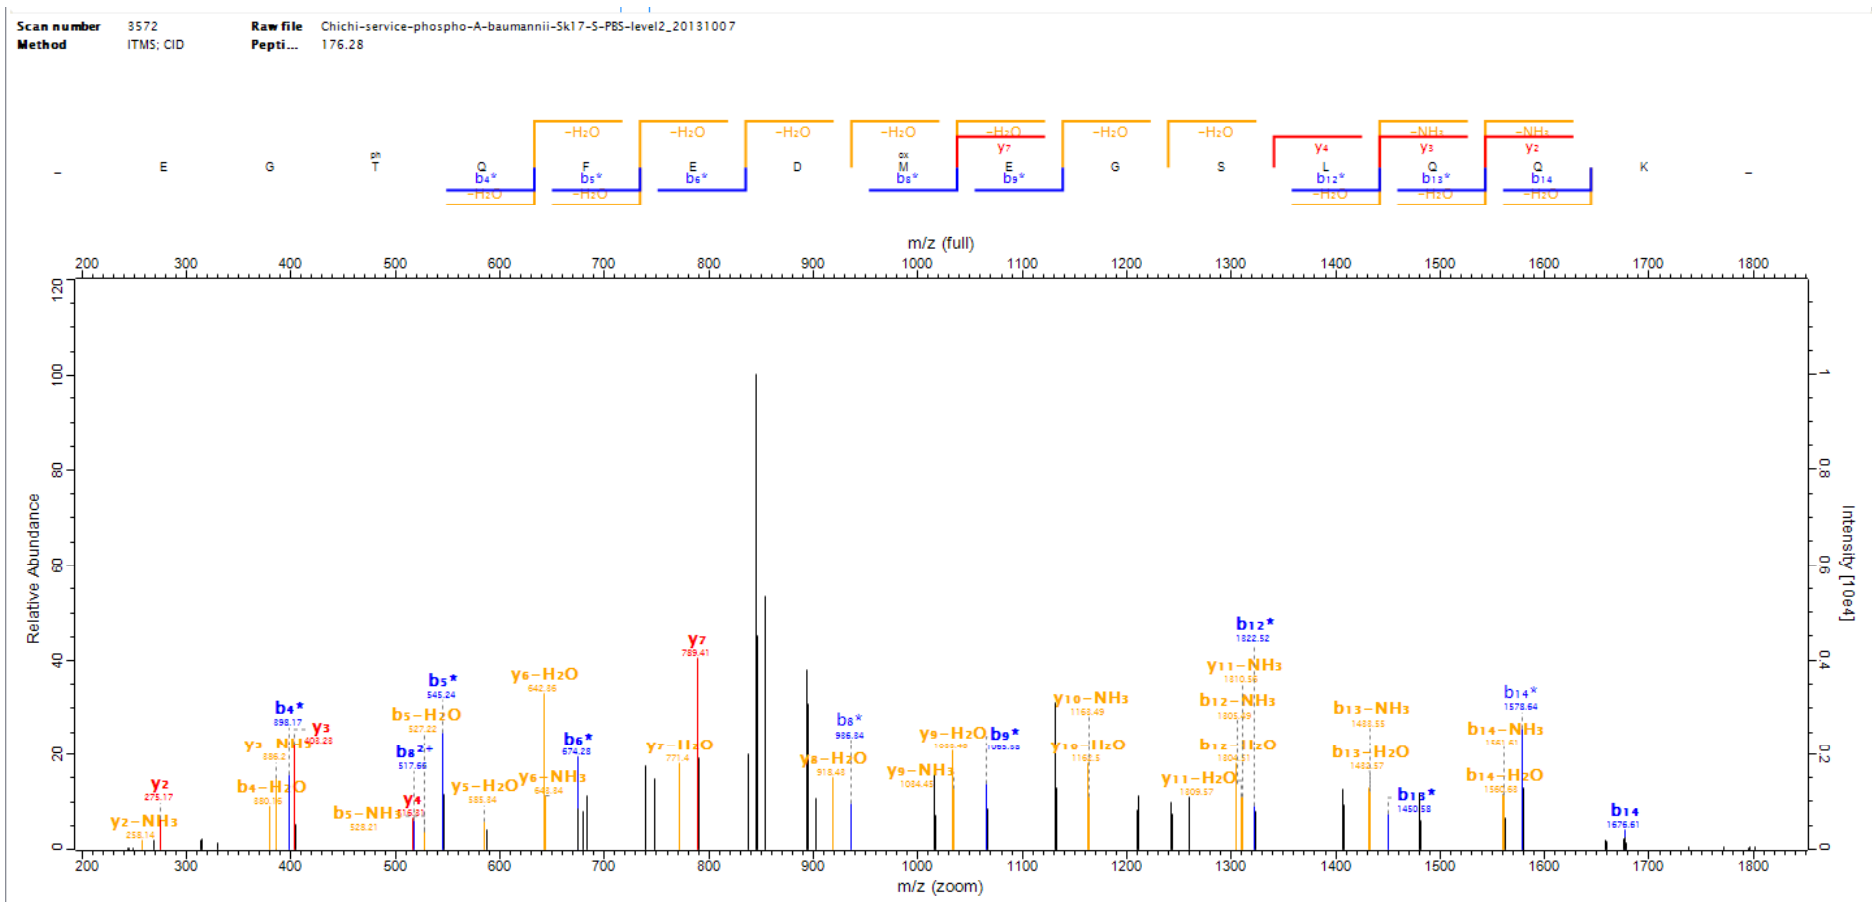

29-3

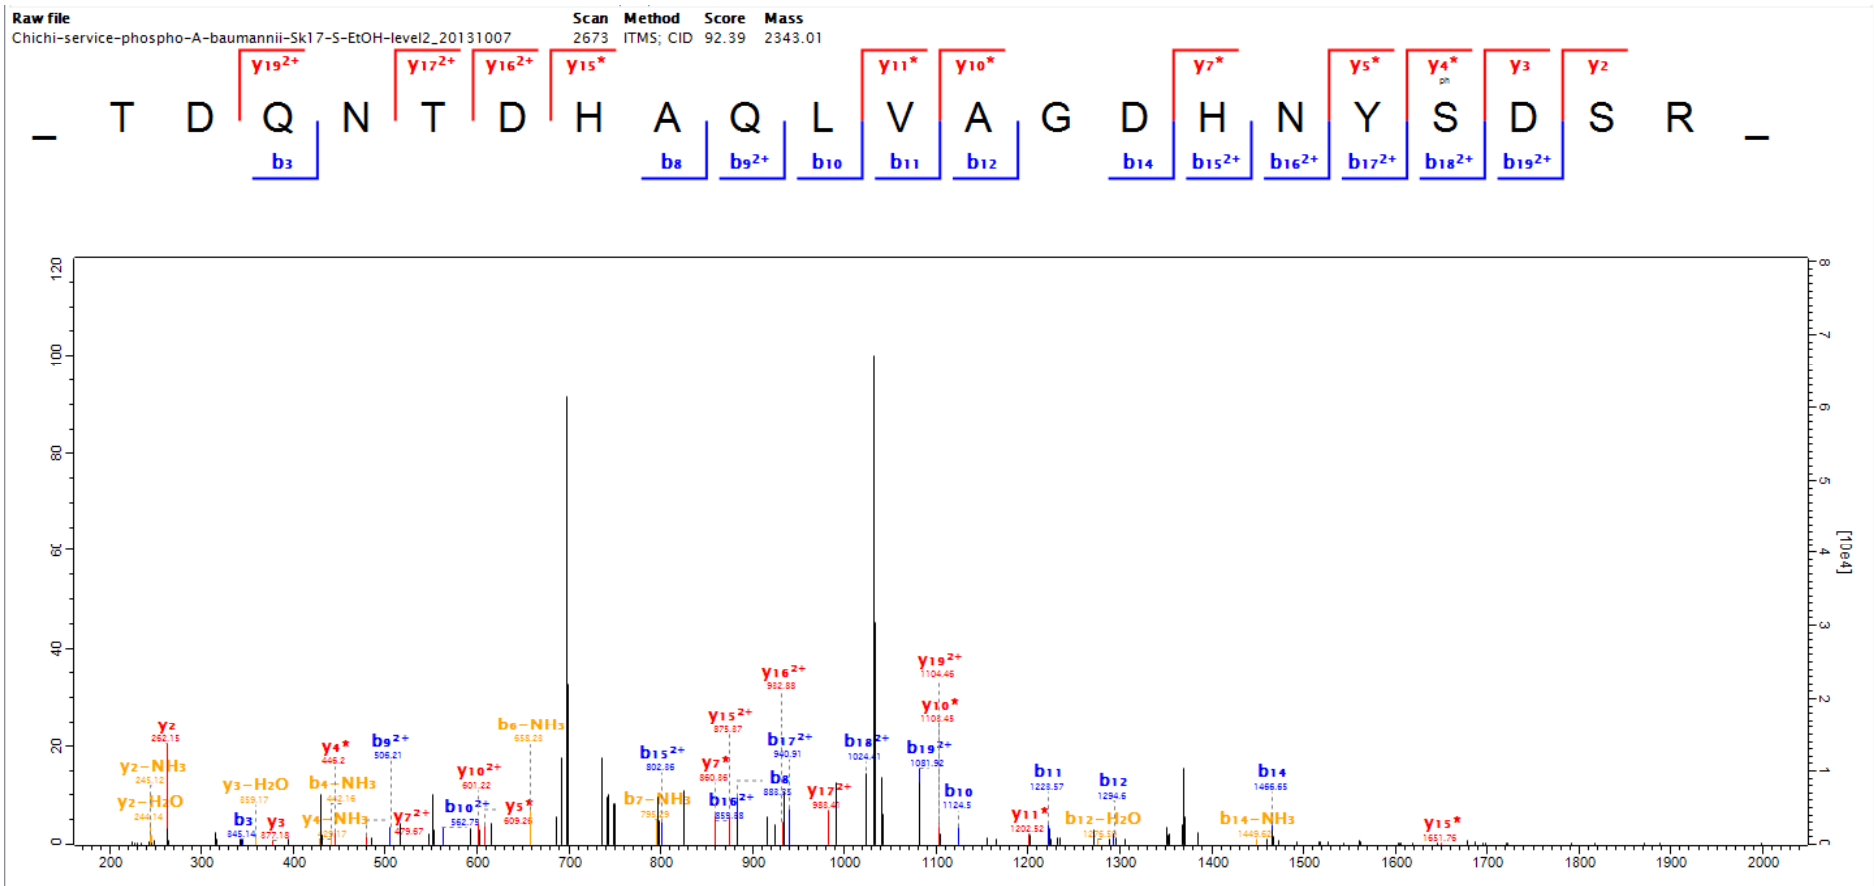

29-4

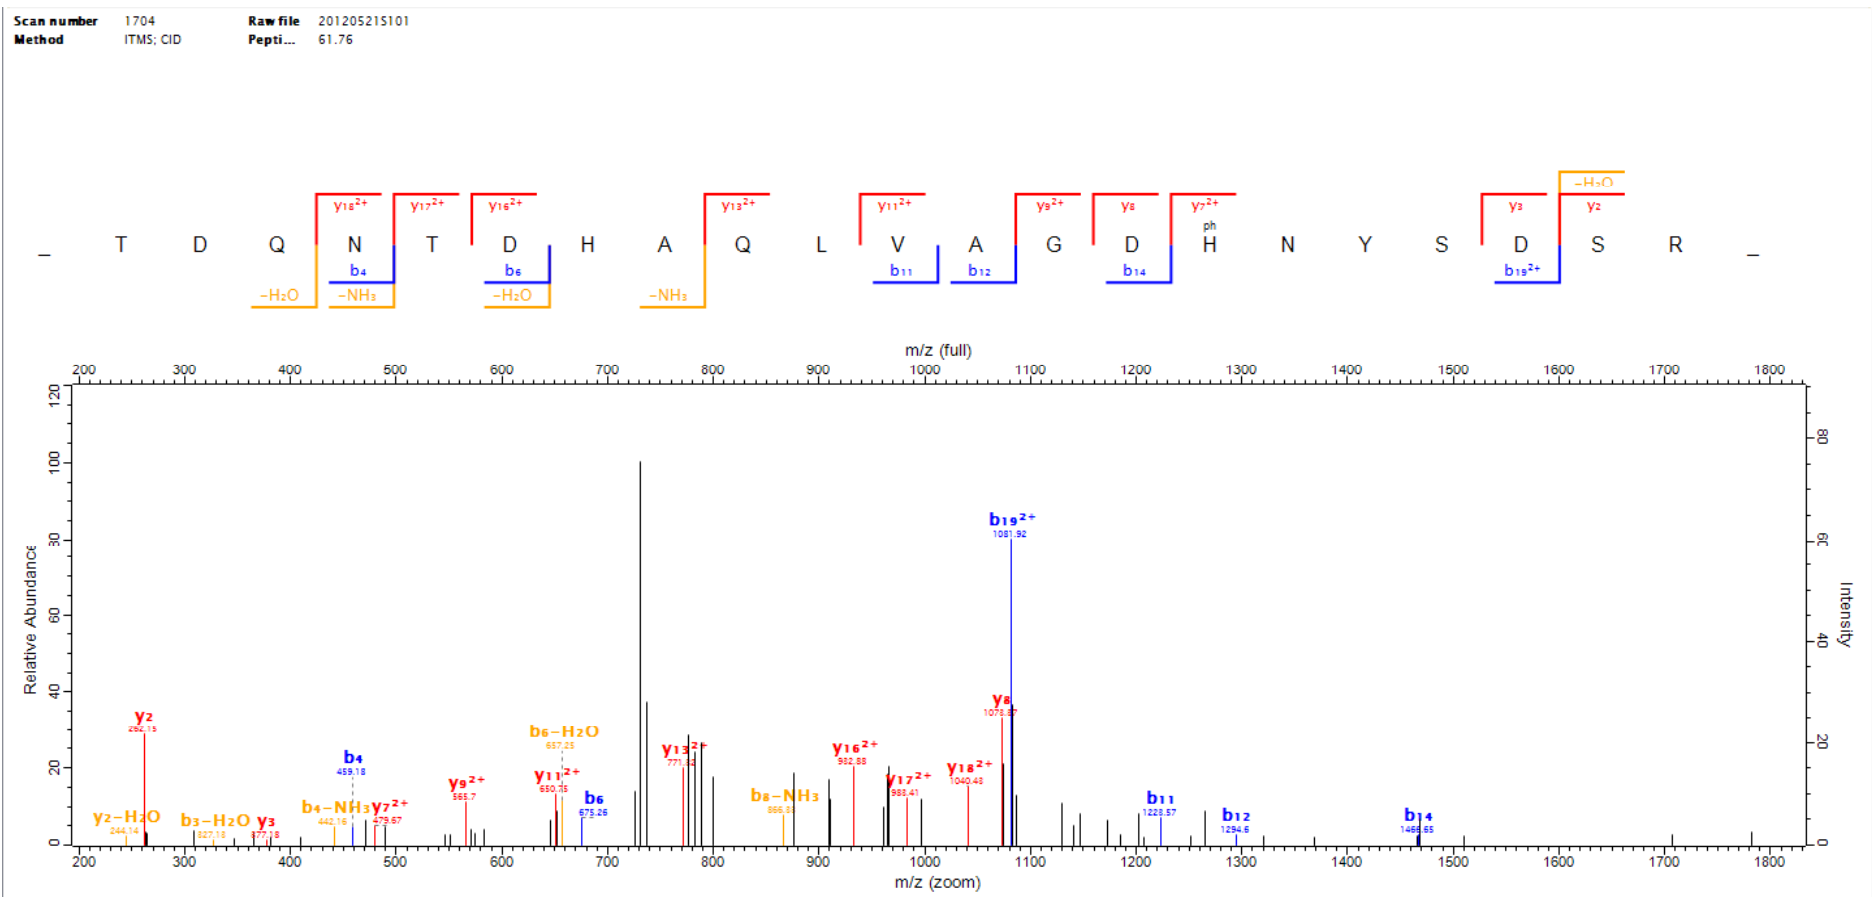

29-5

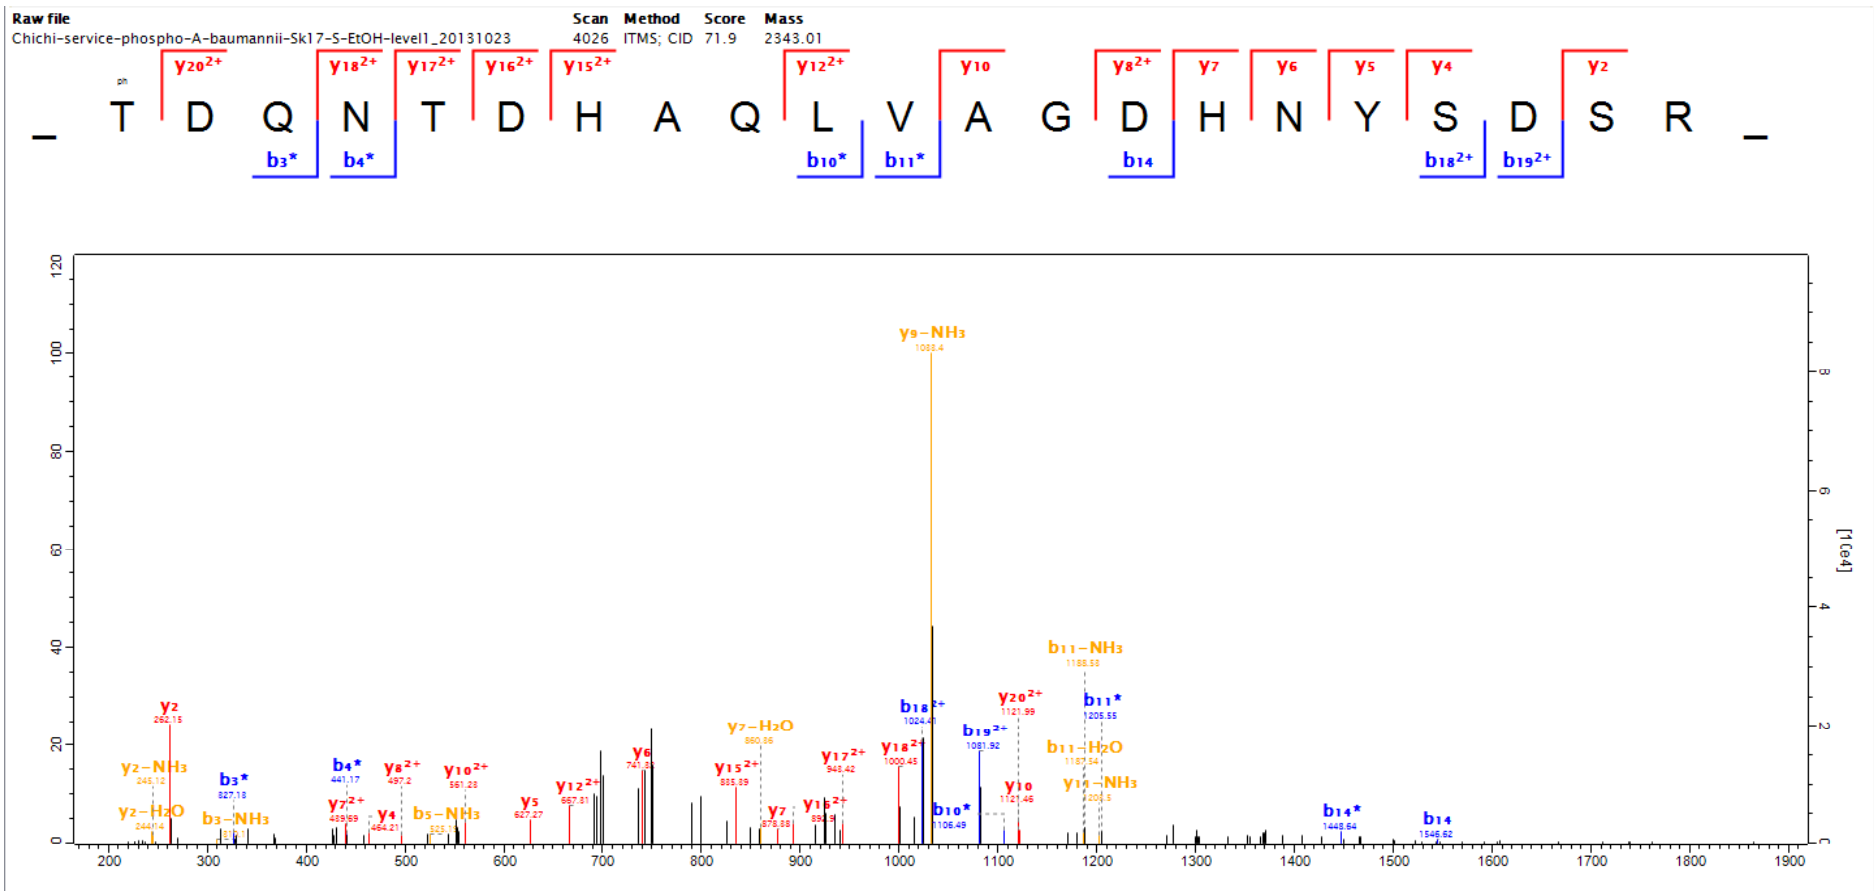

# 29-6

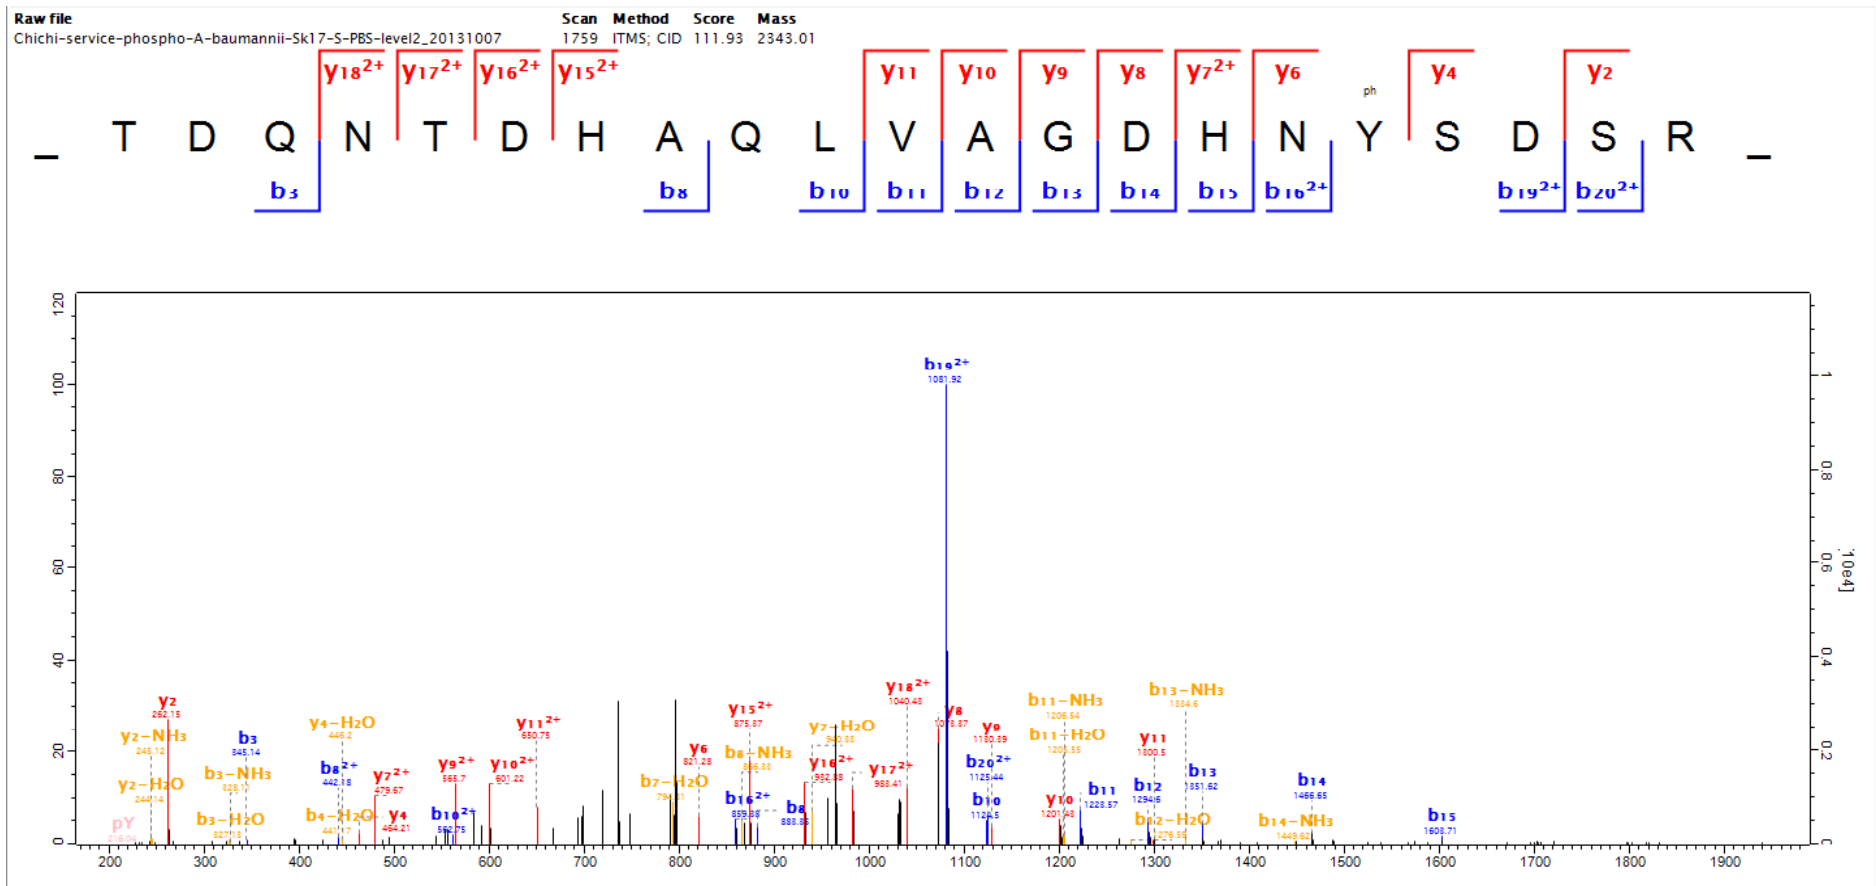



29-7

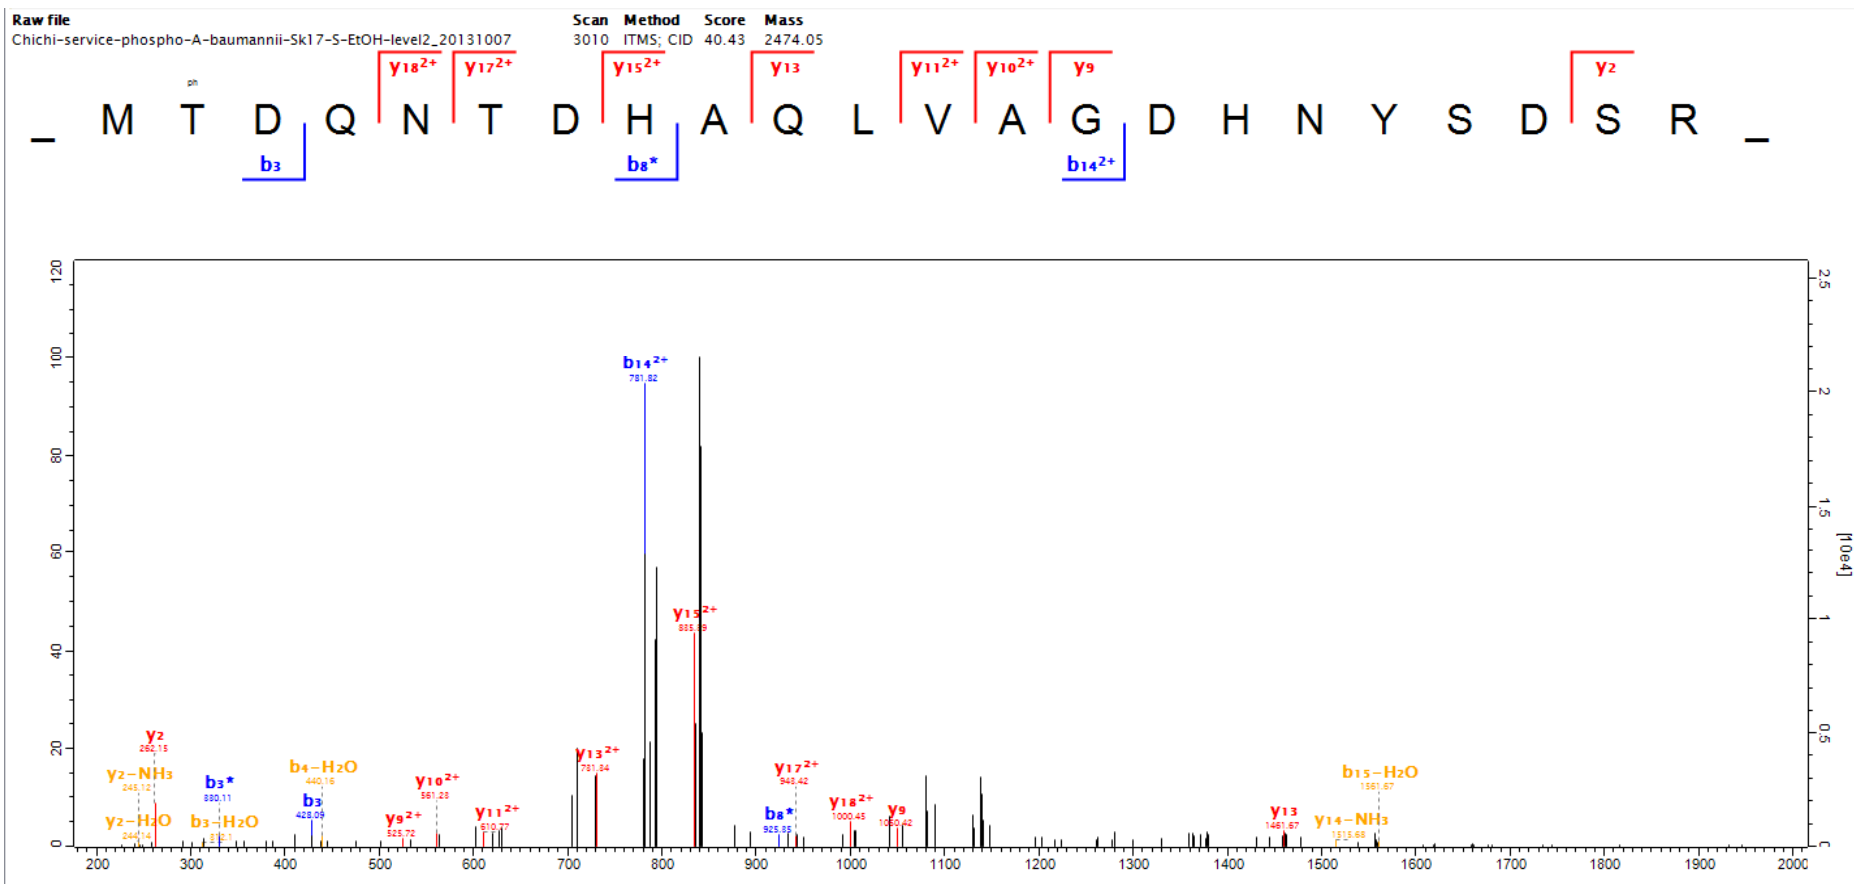

29-8

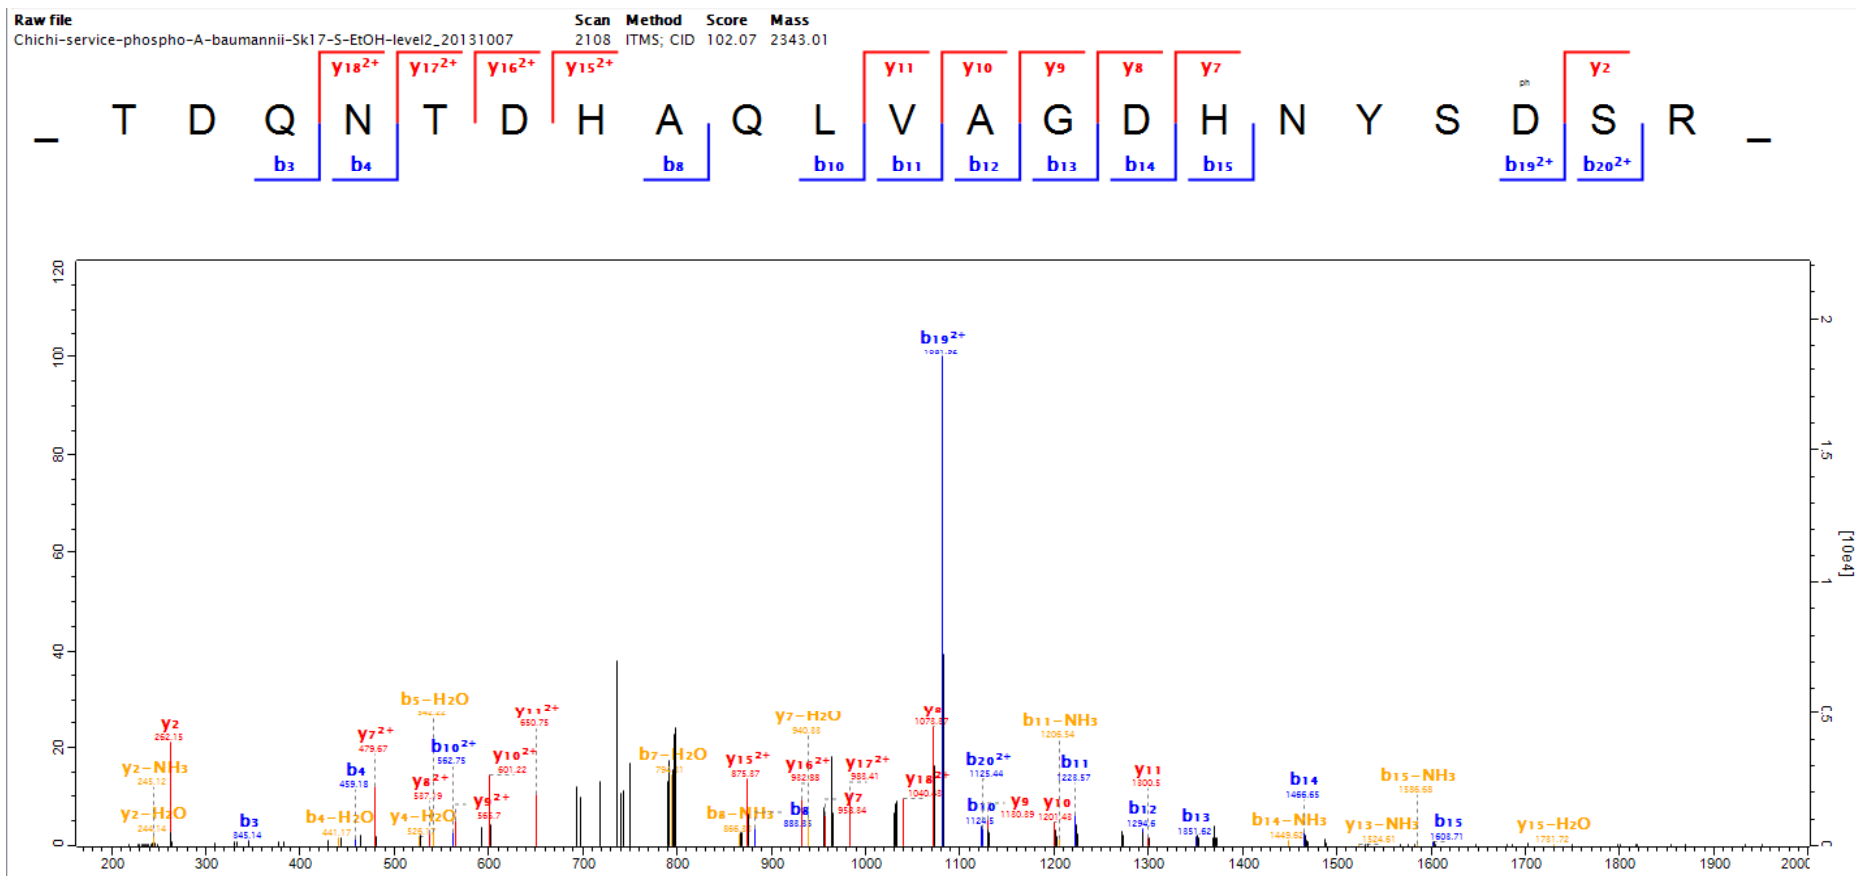

29-9

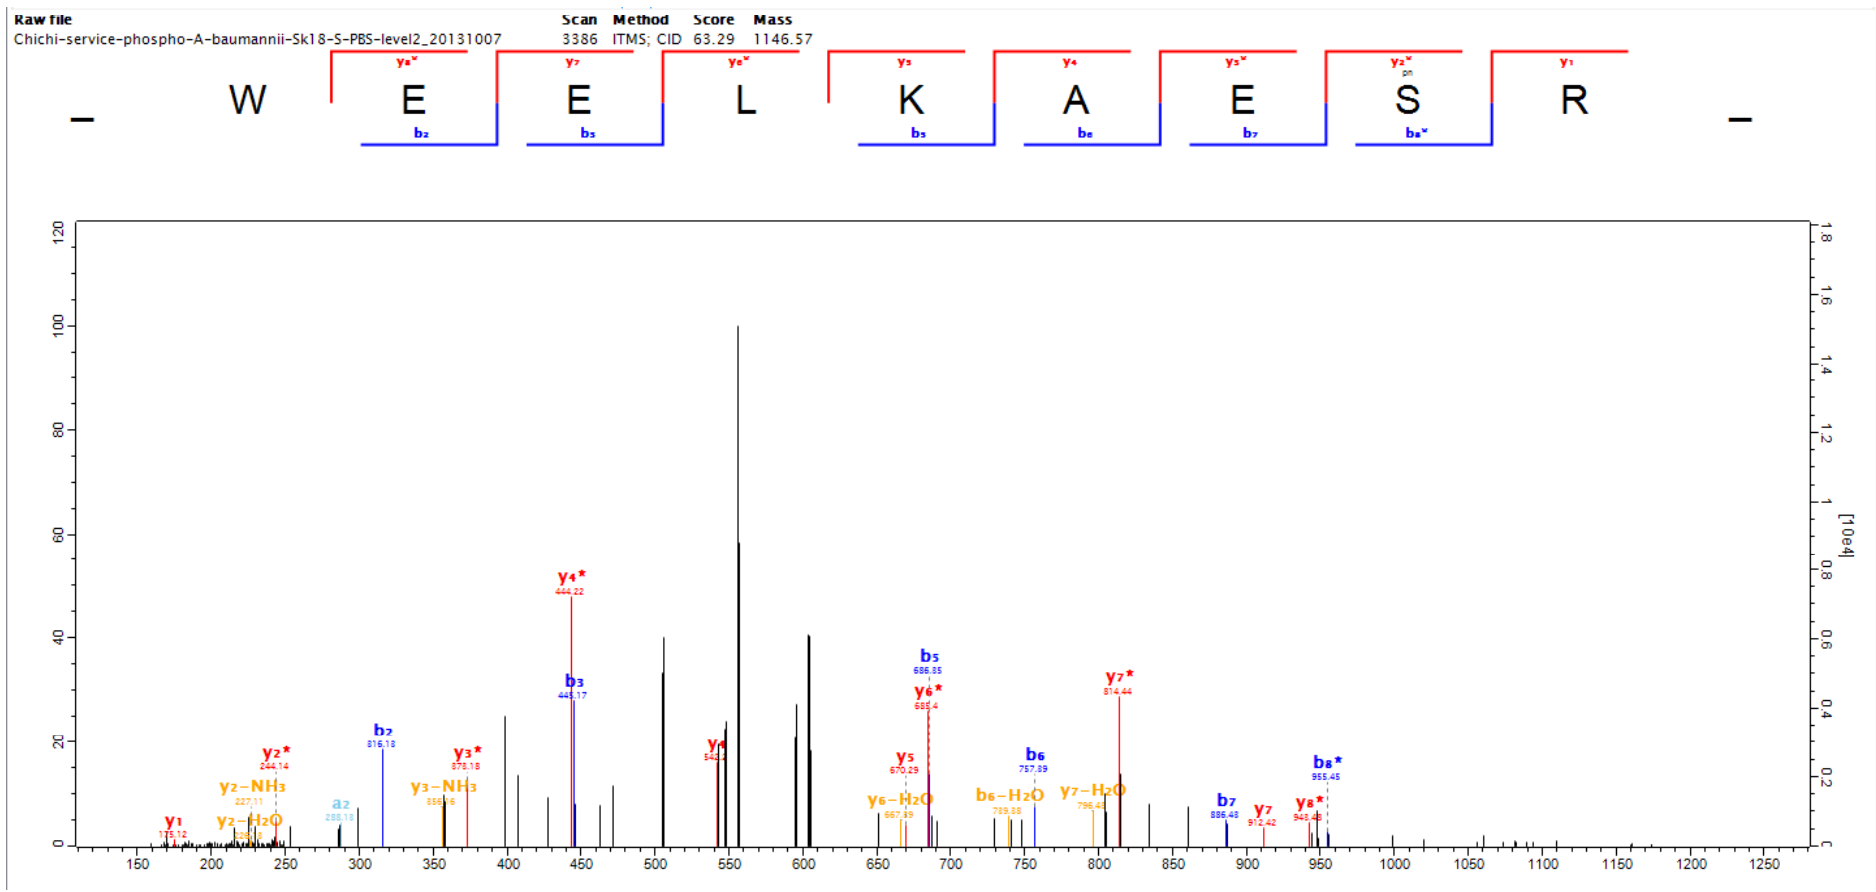

30-1

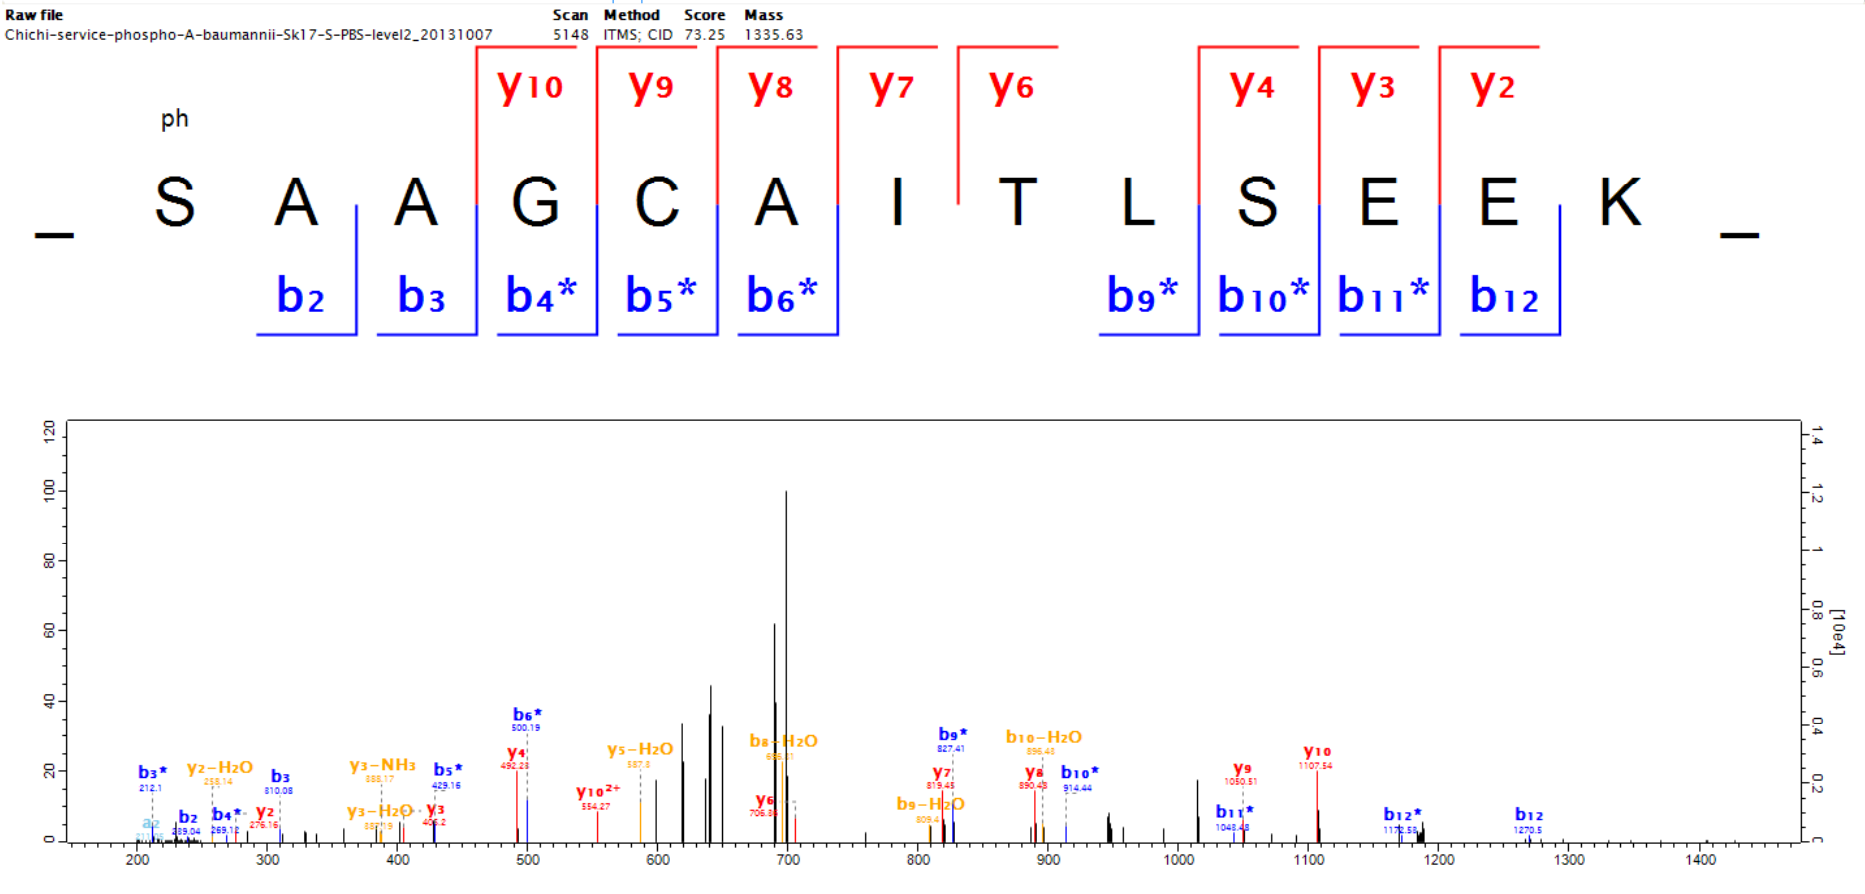

30-2

Scan number 14353 Raw file Chichi-service-phospho-A-baumannii-Sk17-5-EtOH-level1\_20131023  
 Method ITMS; CID Pepti... 41.16

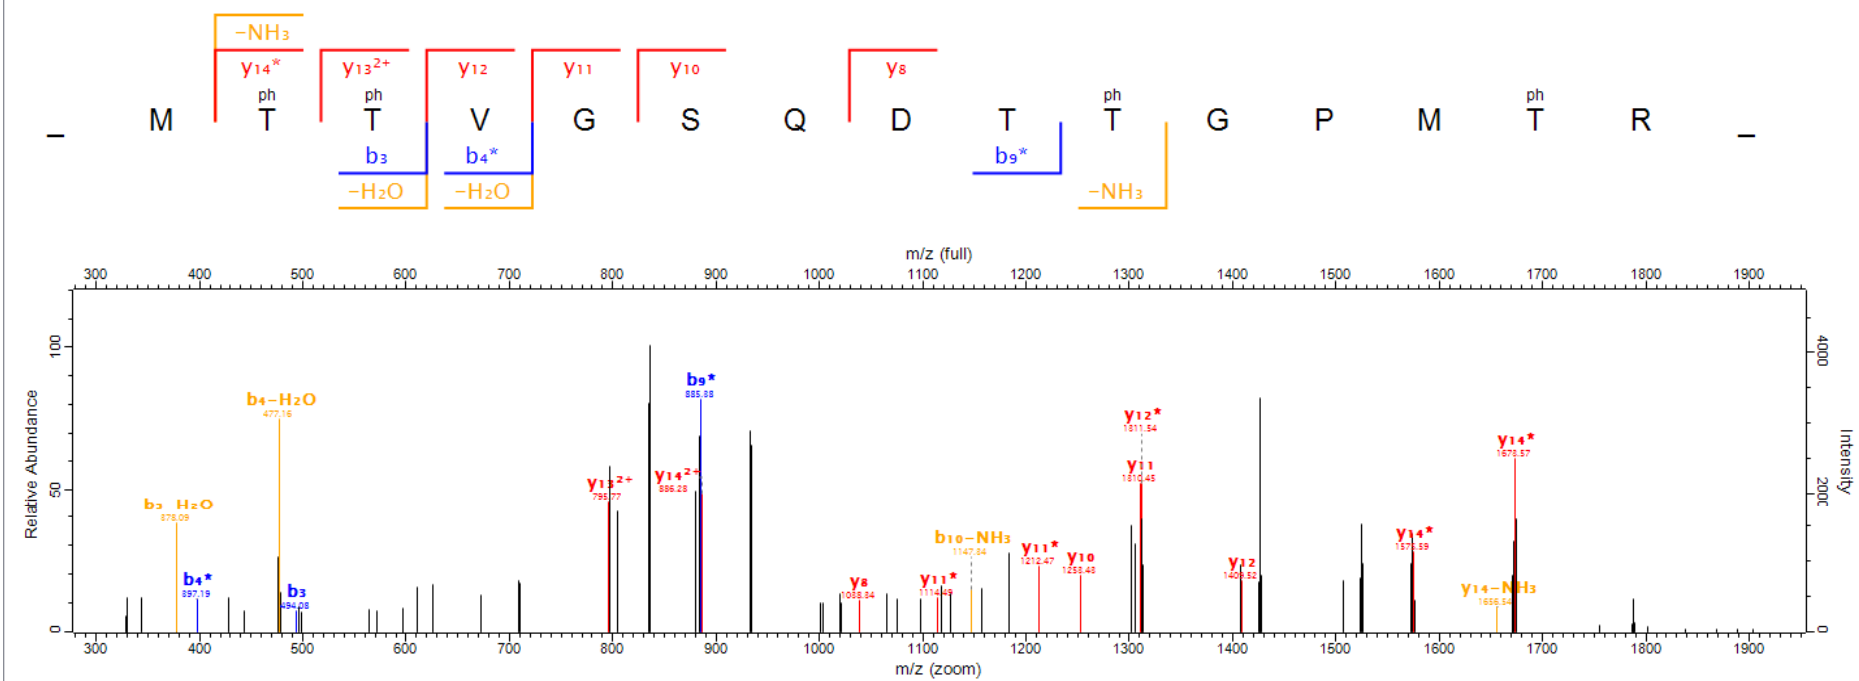

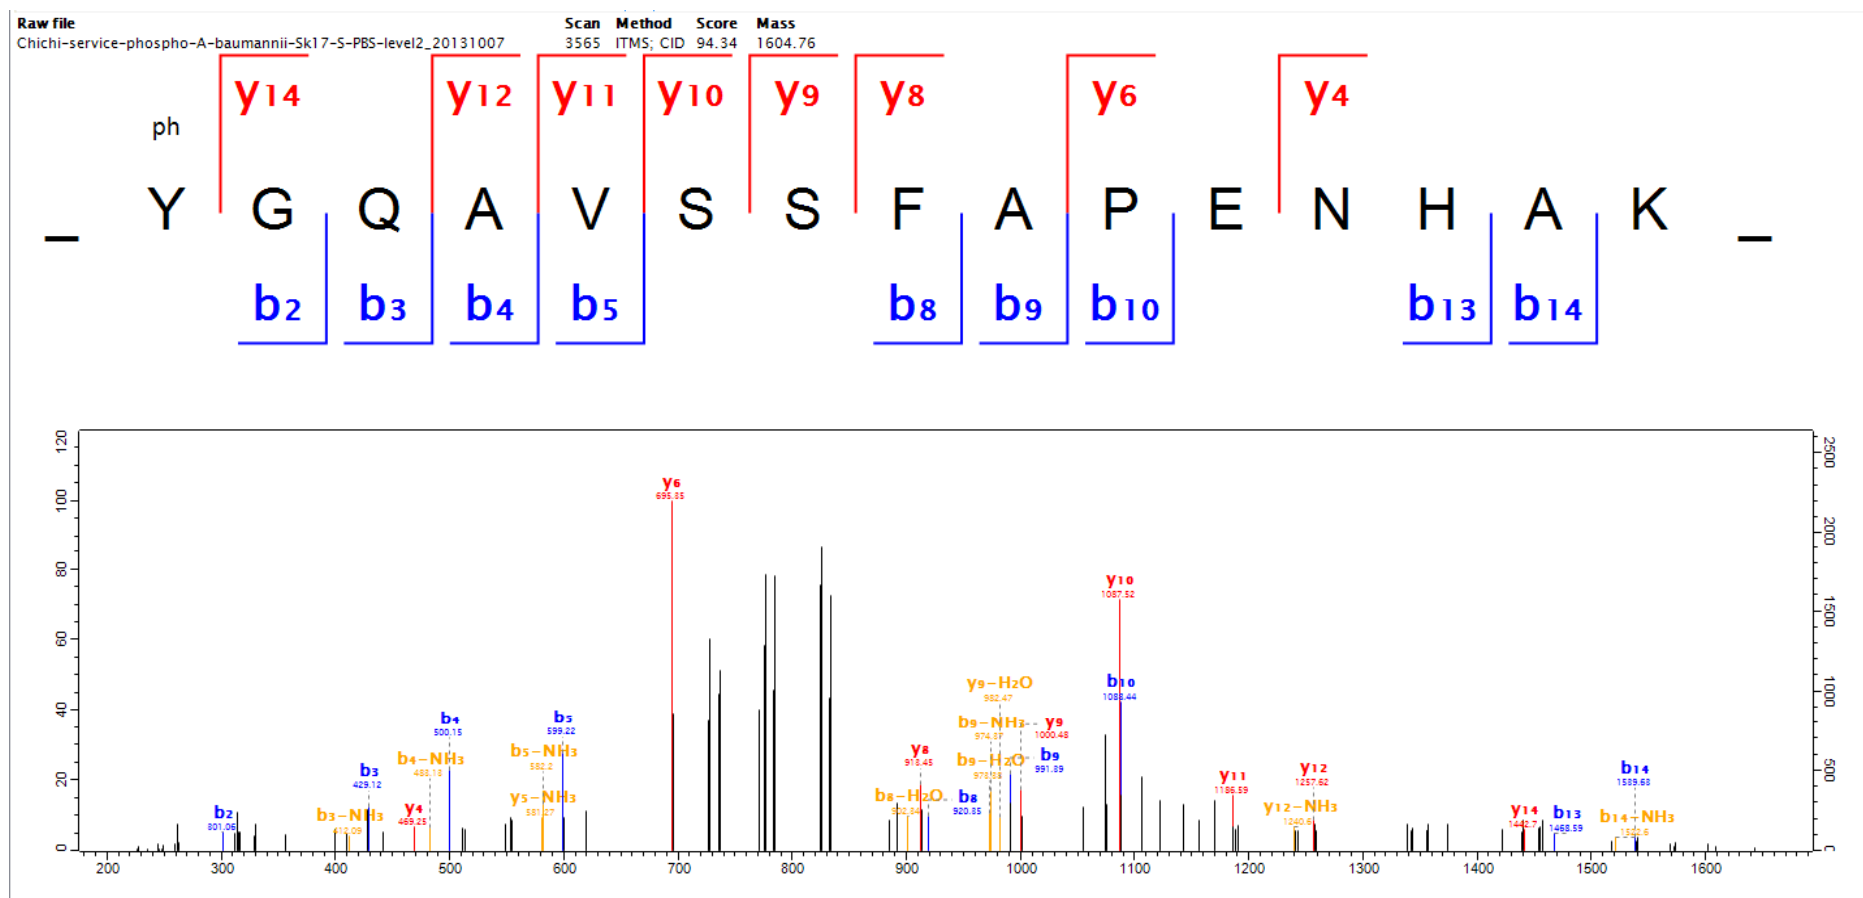

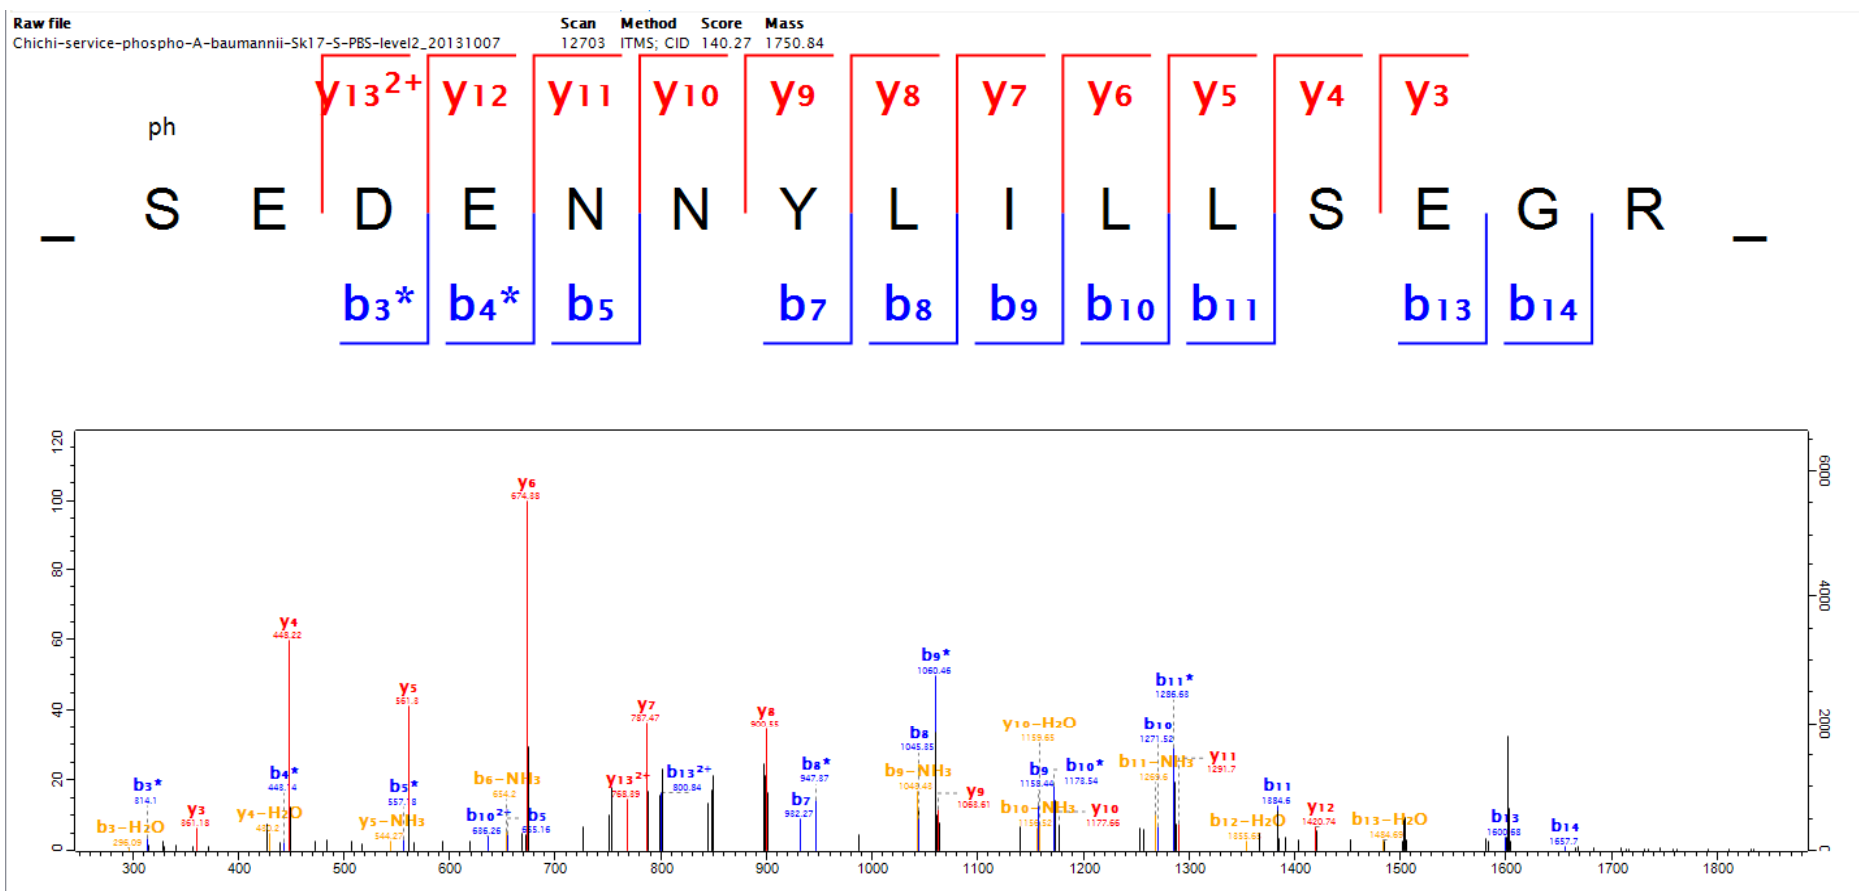

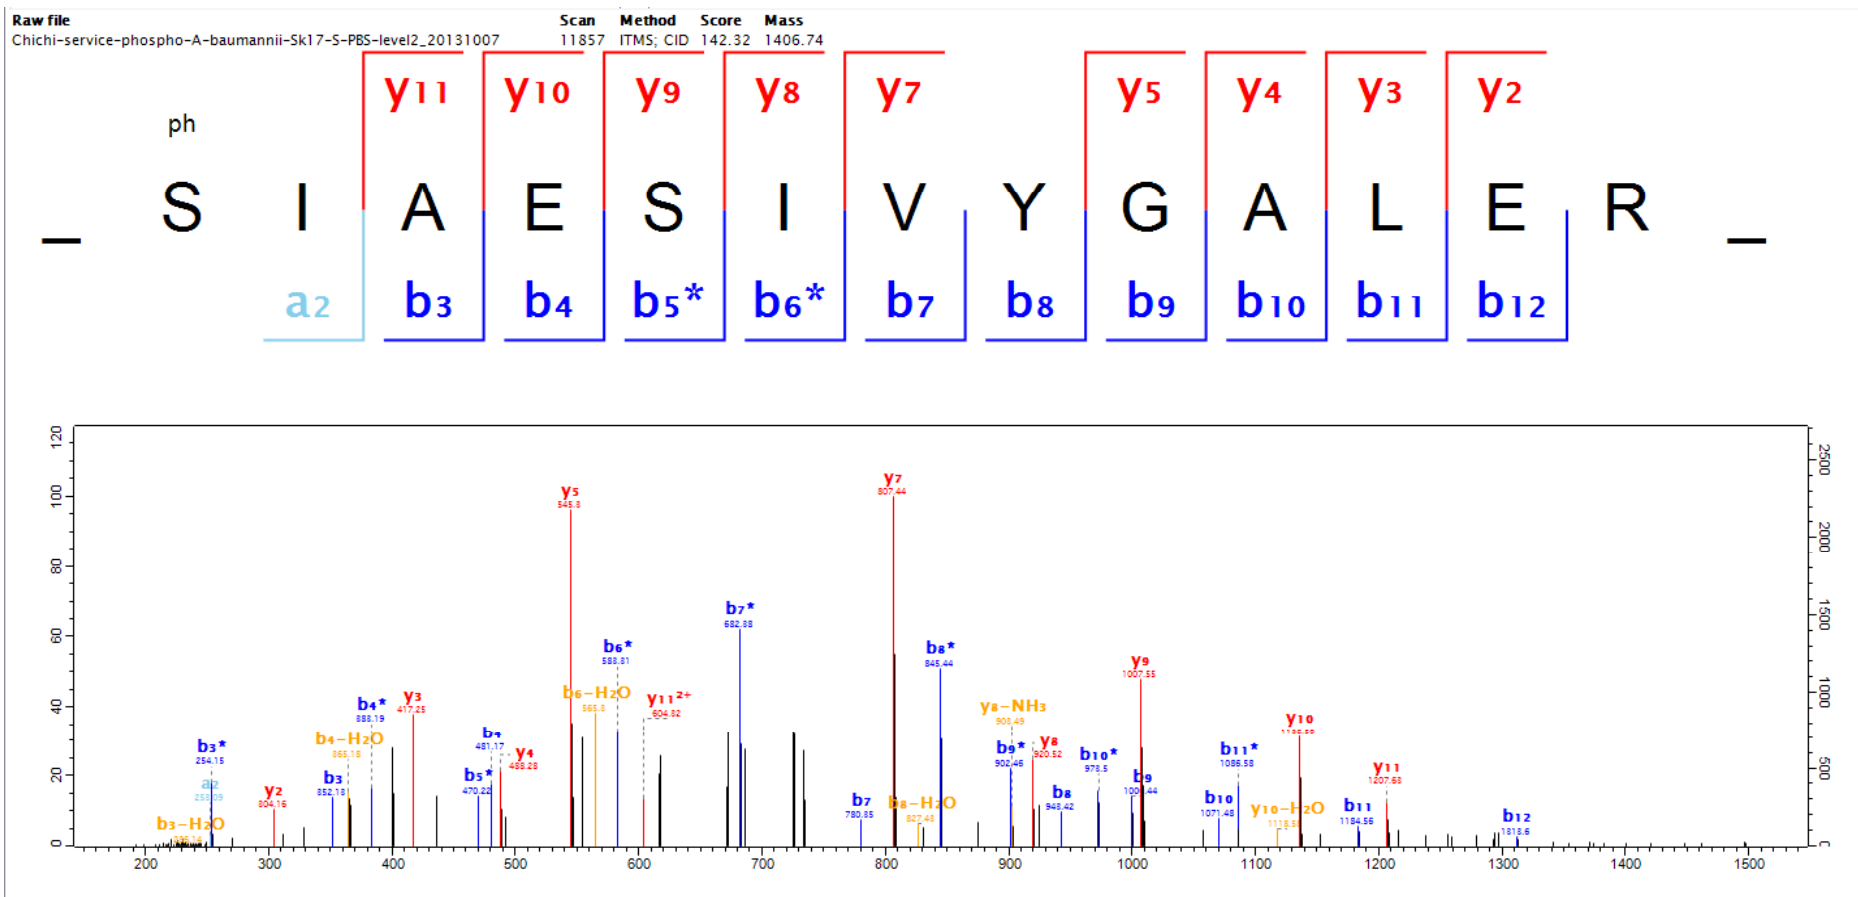



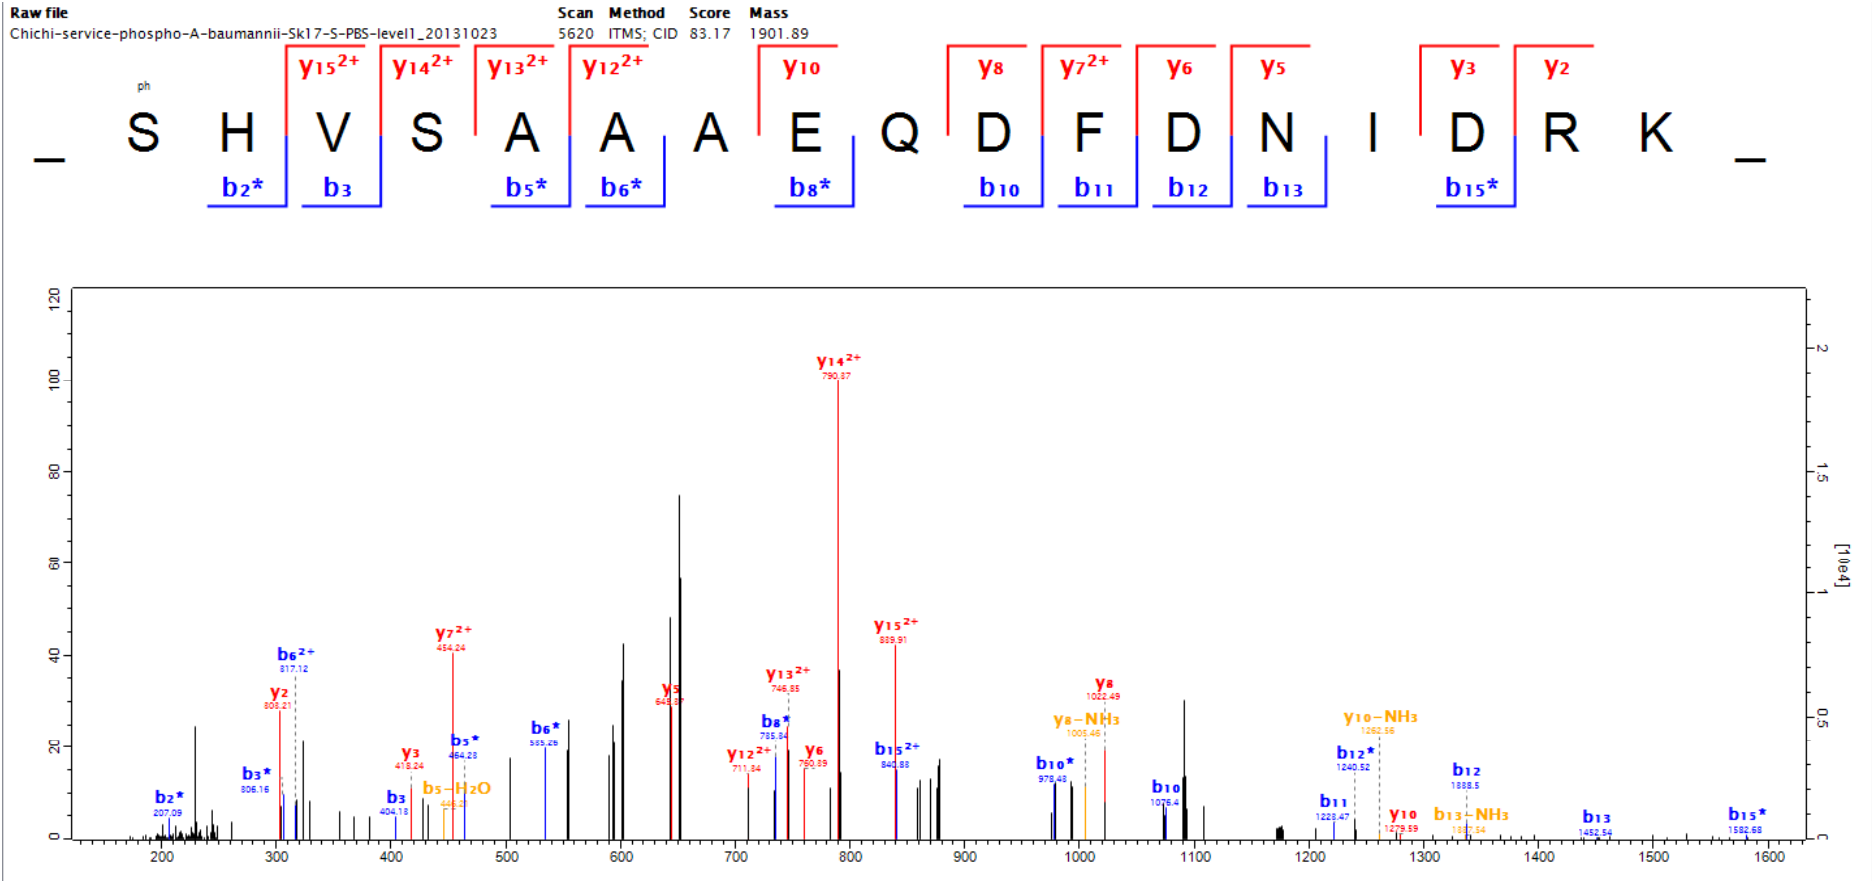

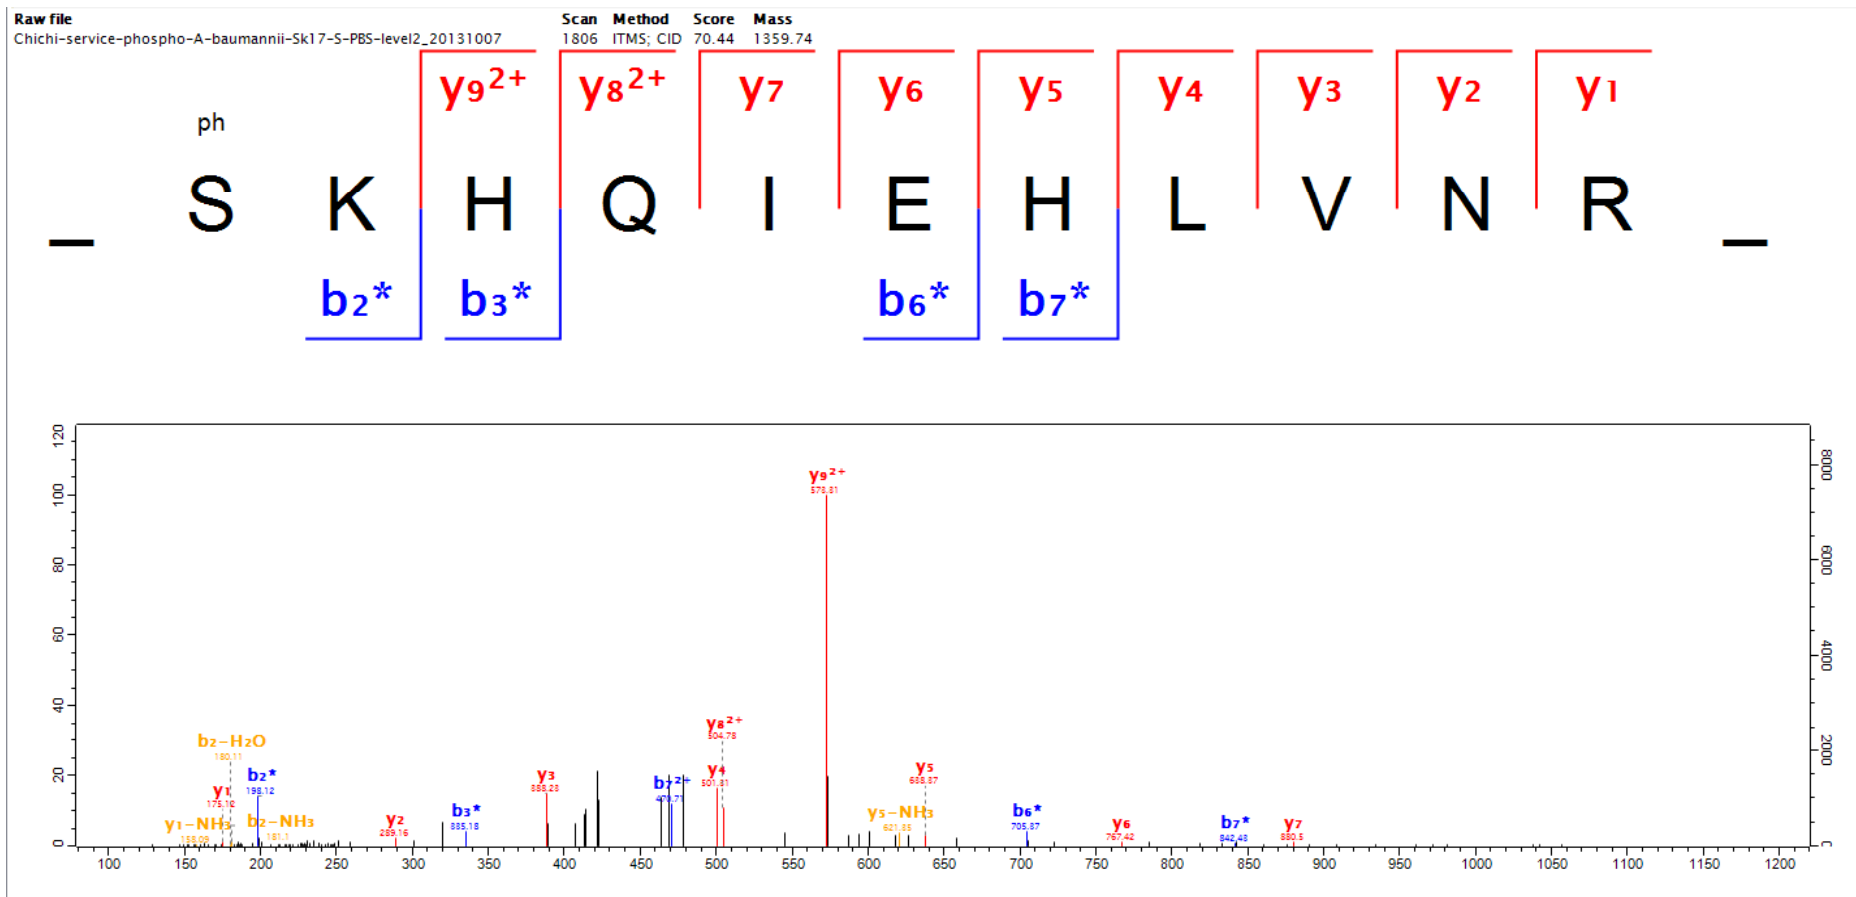

Raw file  
Chichi-service-phospho-A-baumannii-Sk17-S-EtOH-level2\_20131007

Scan Method Score Mass  
5301 ITMS; CID 66.06 1293.58

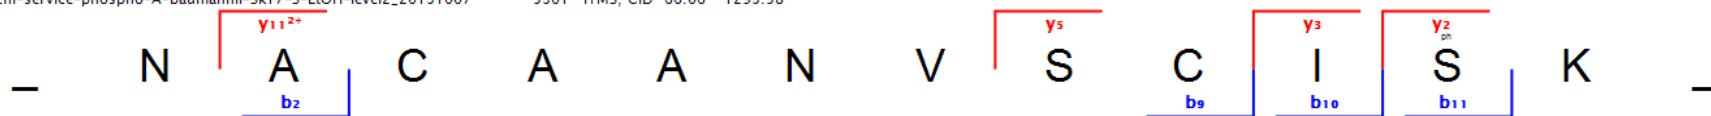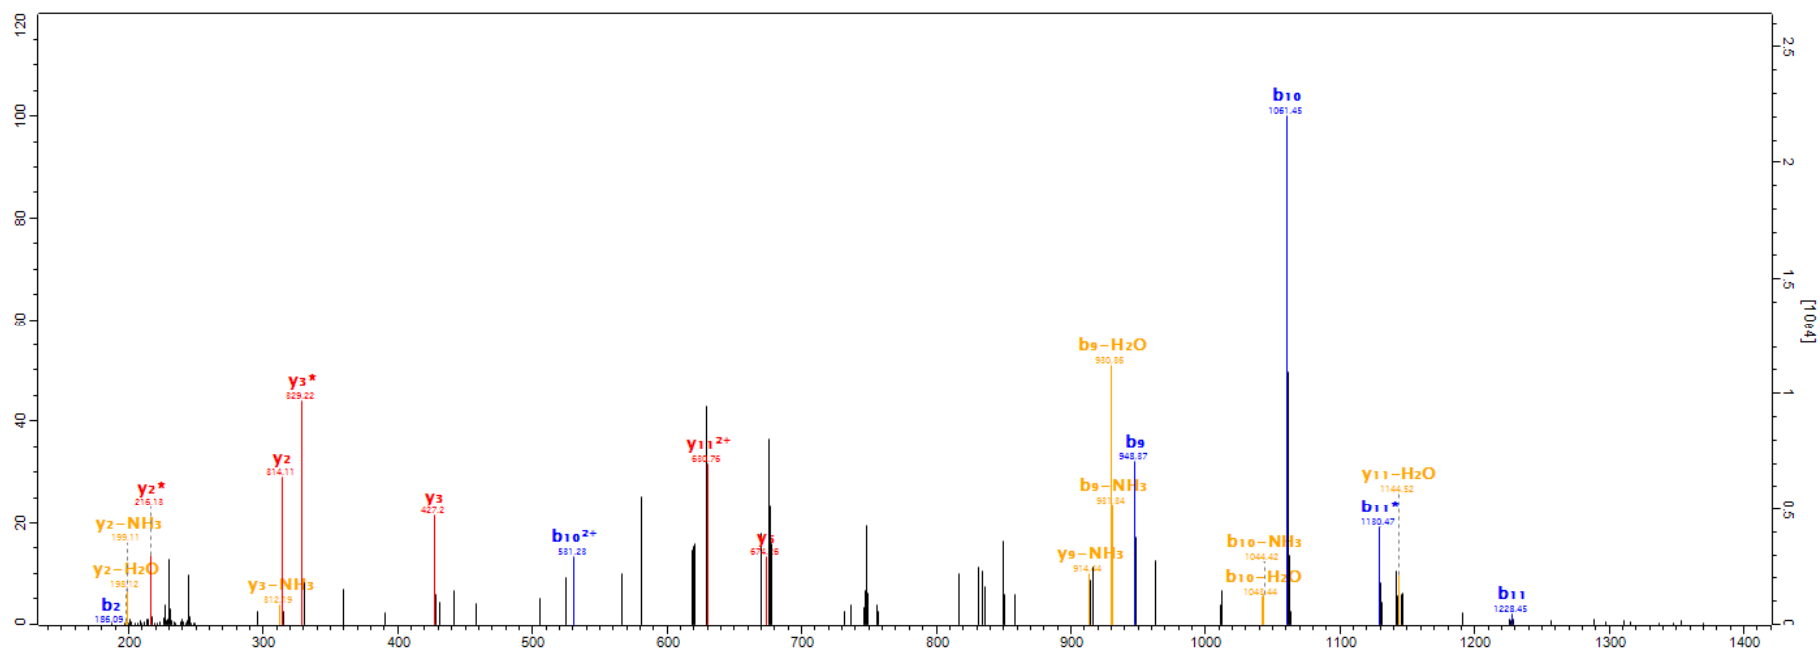

37-1

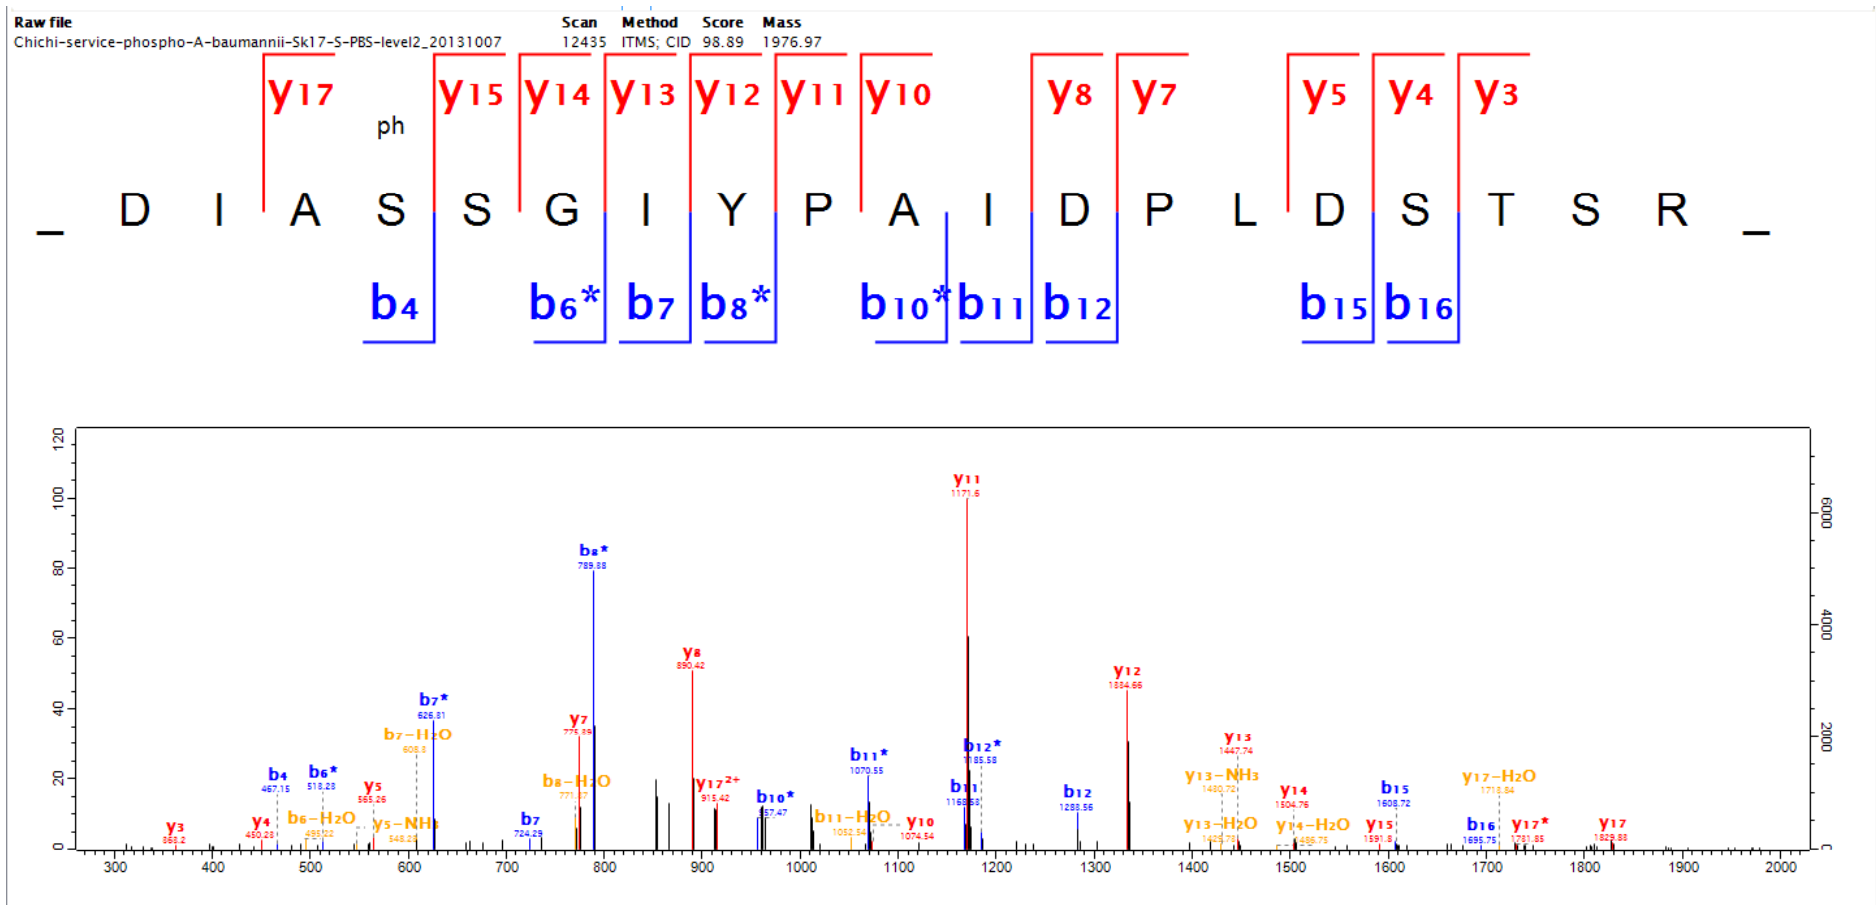

37-2

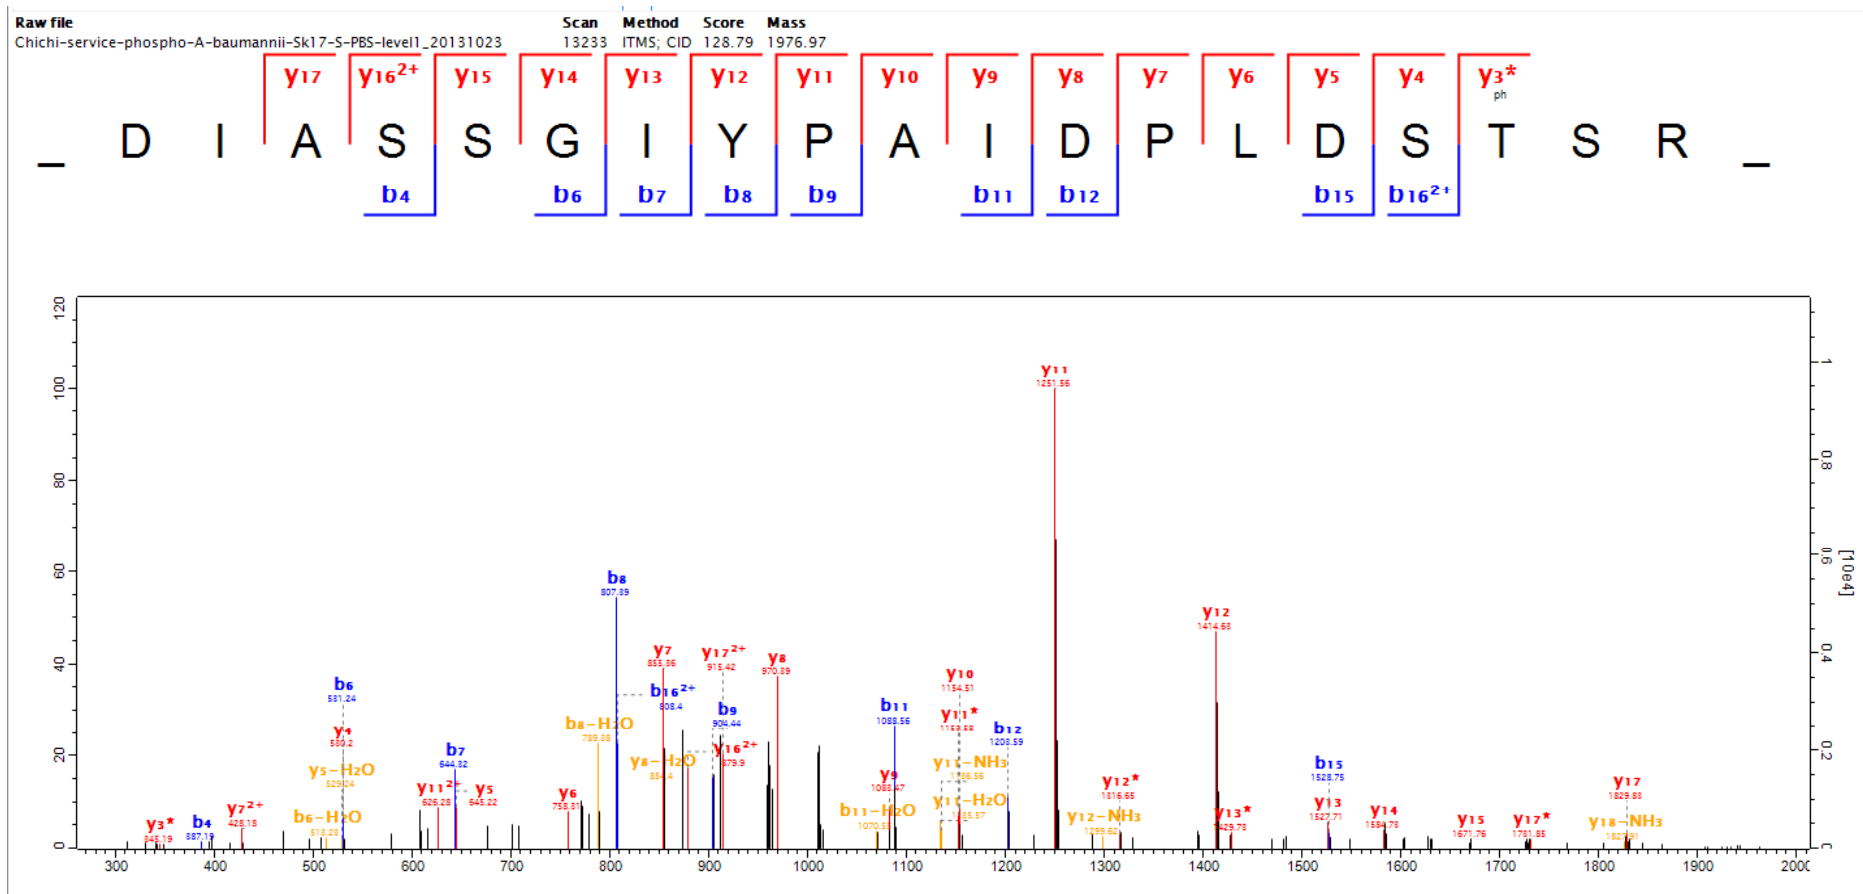

37-3

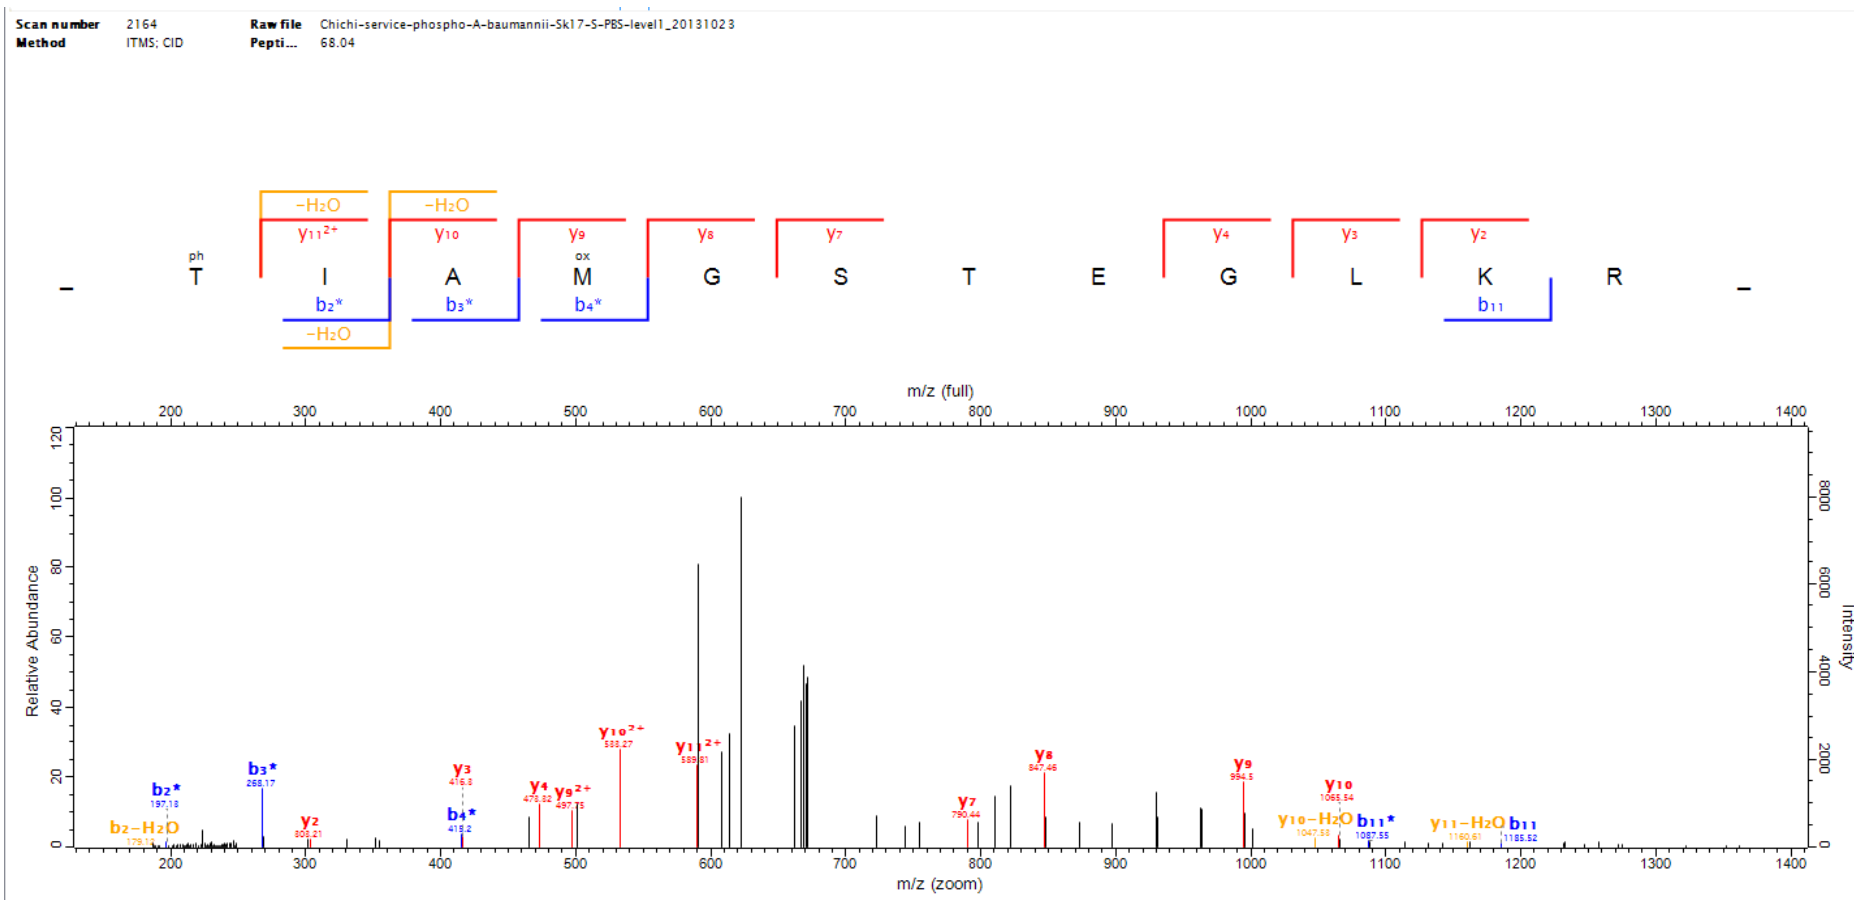

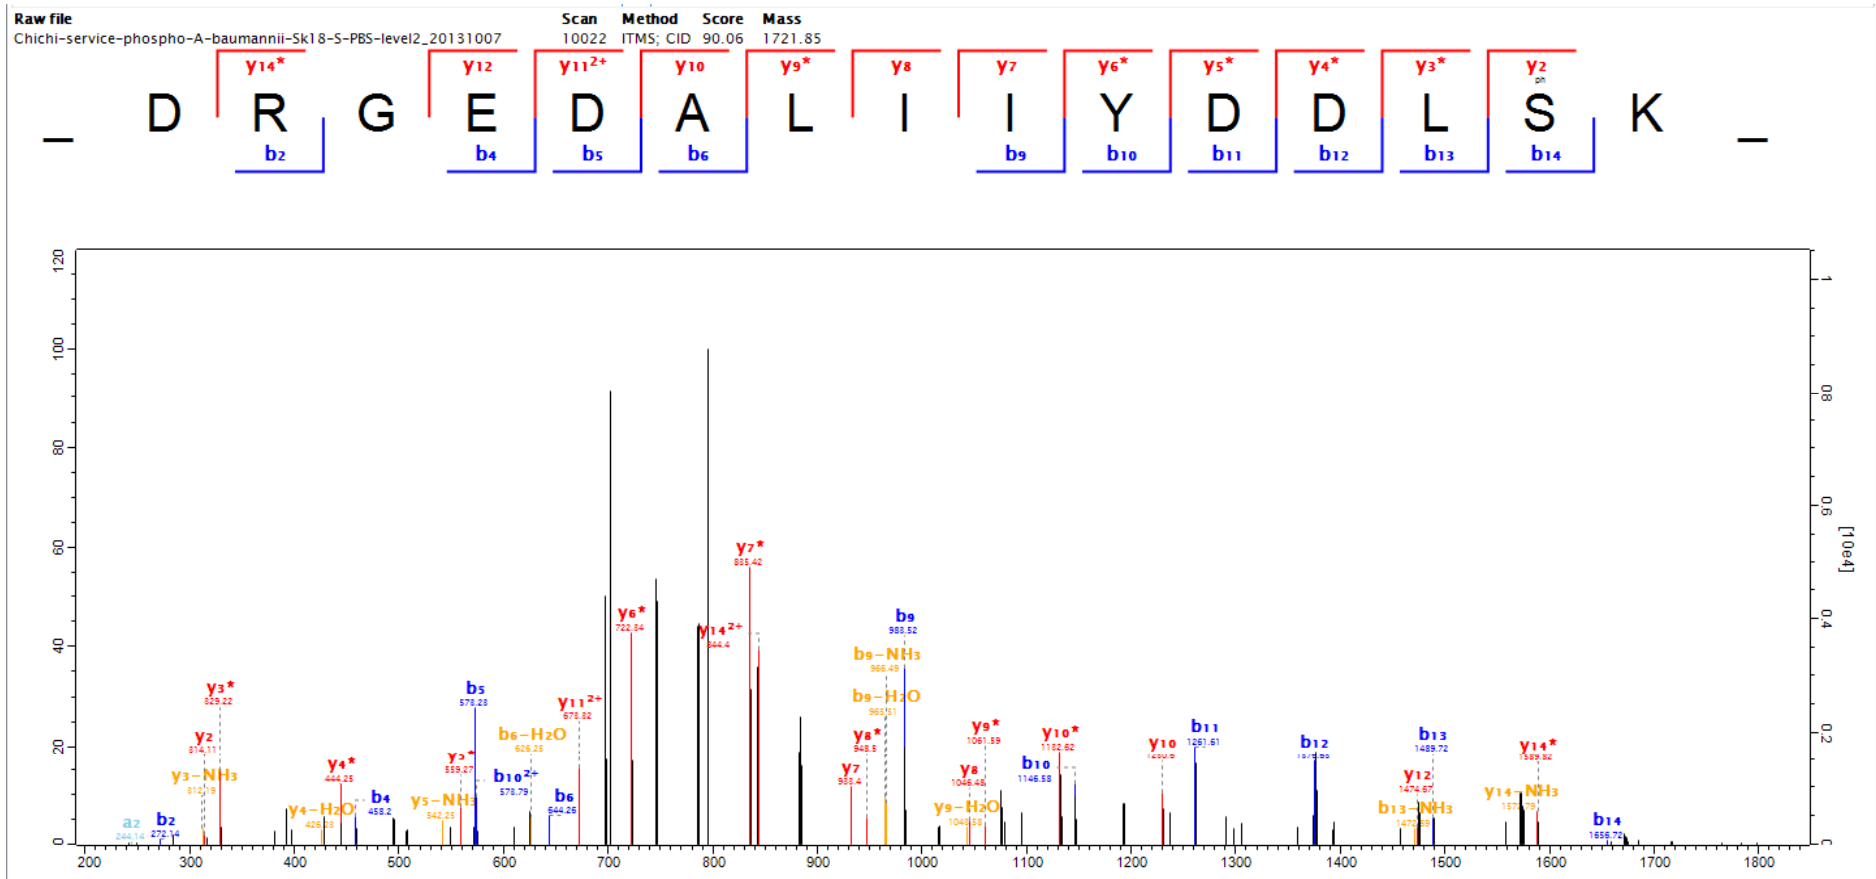

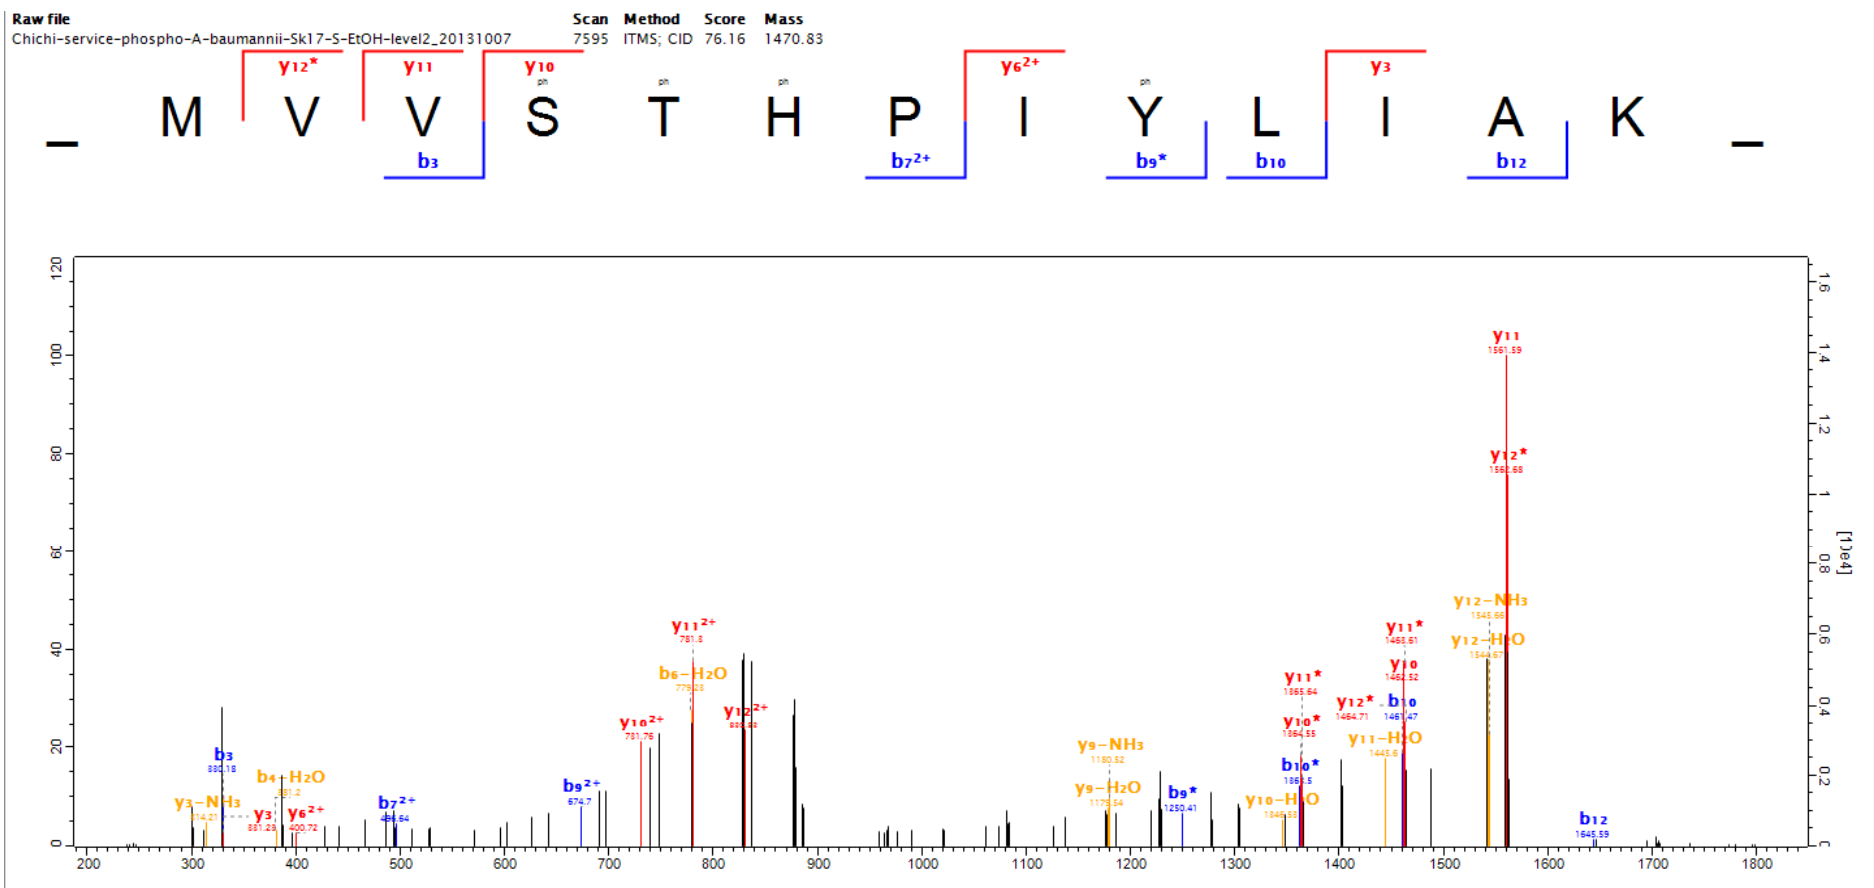



40-1

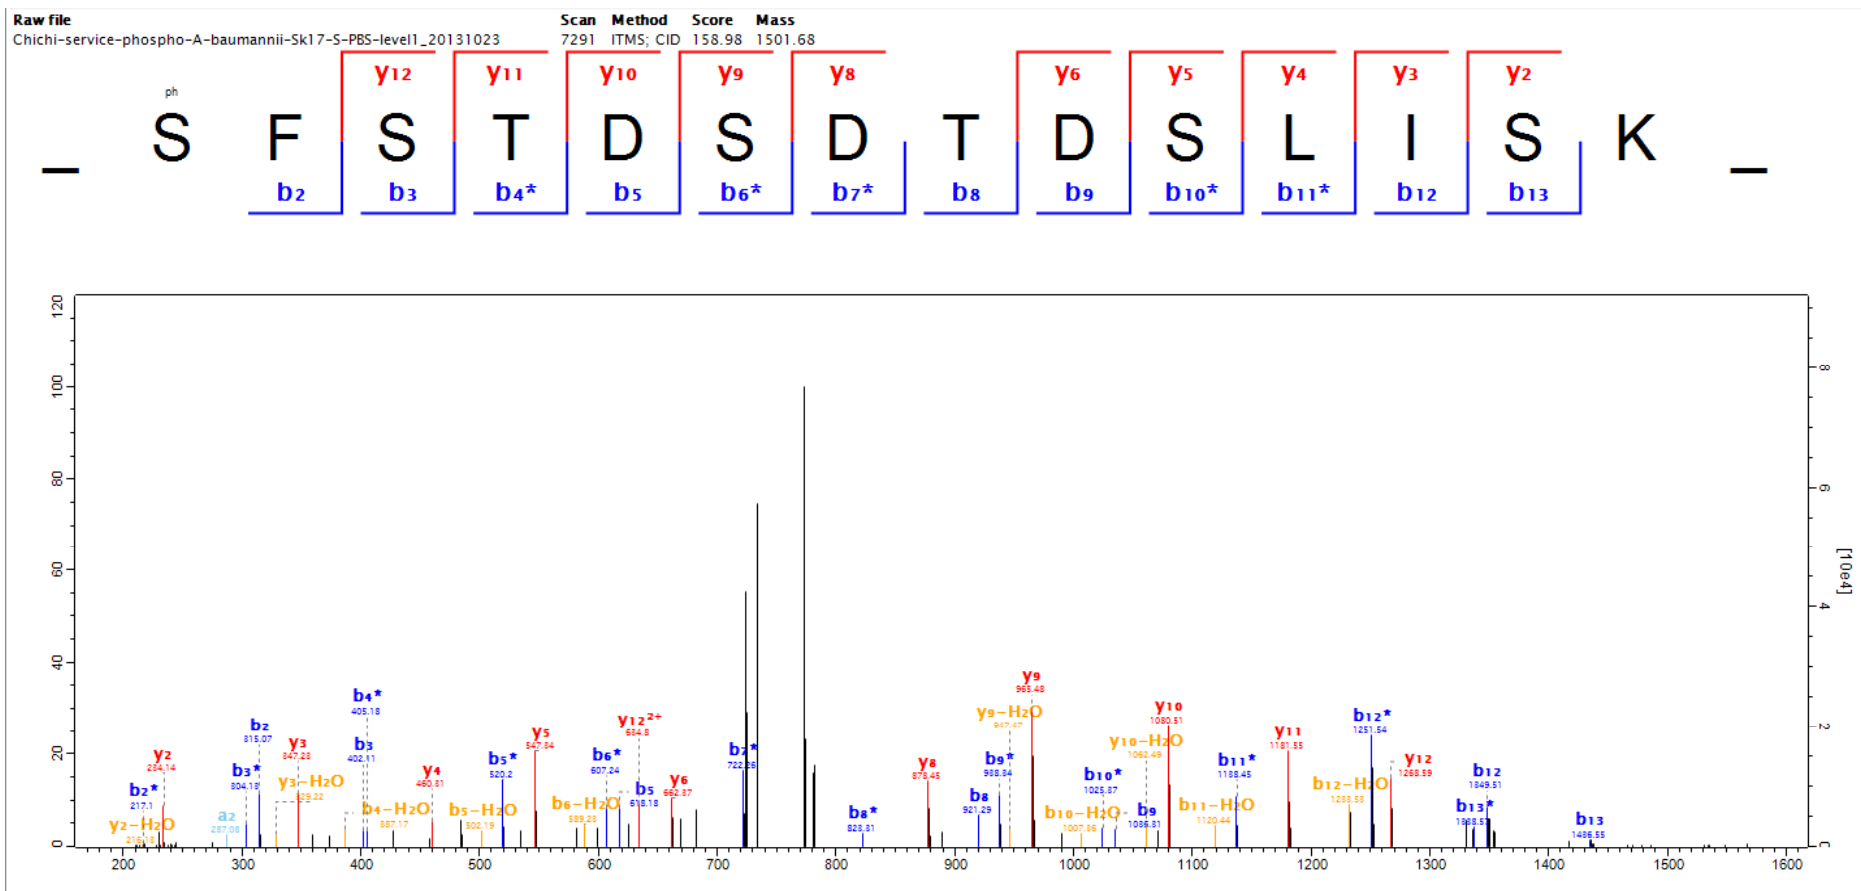

40-2

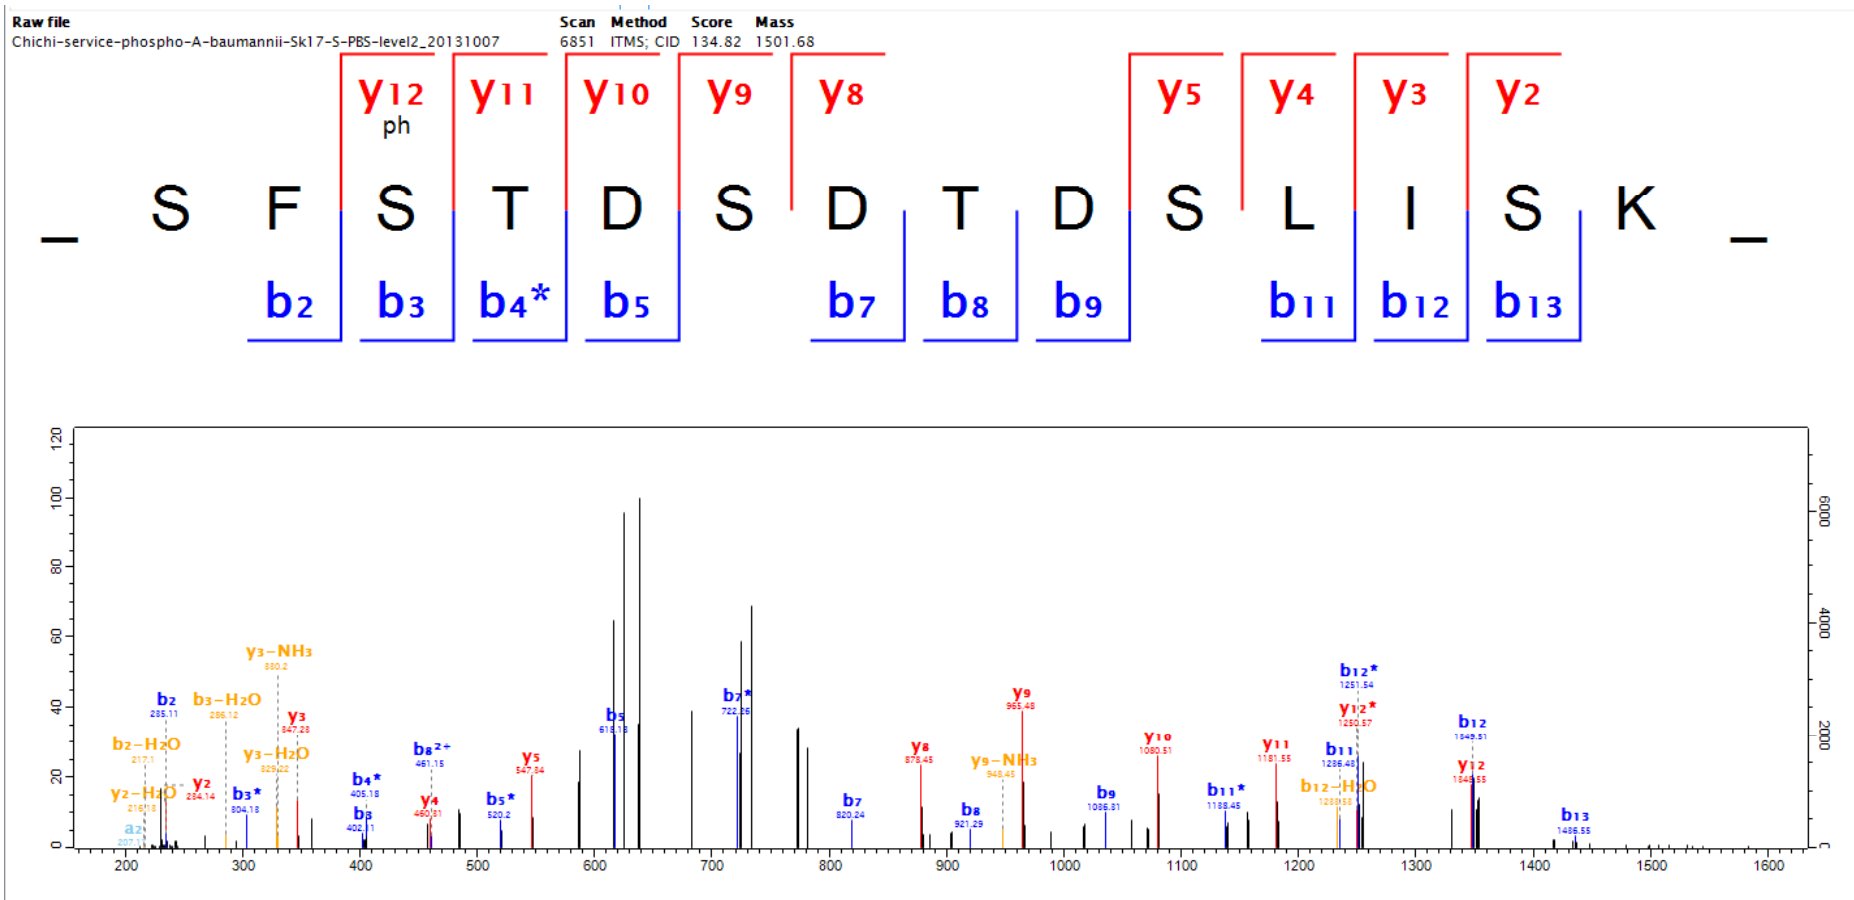

40-3

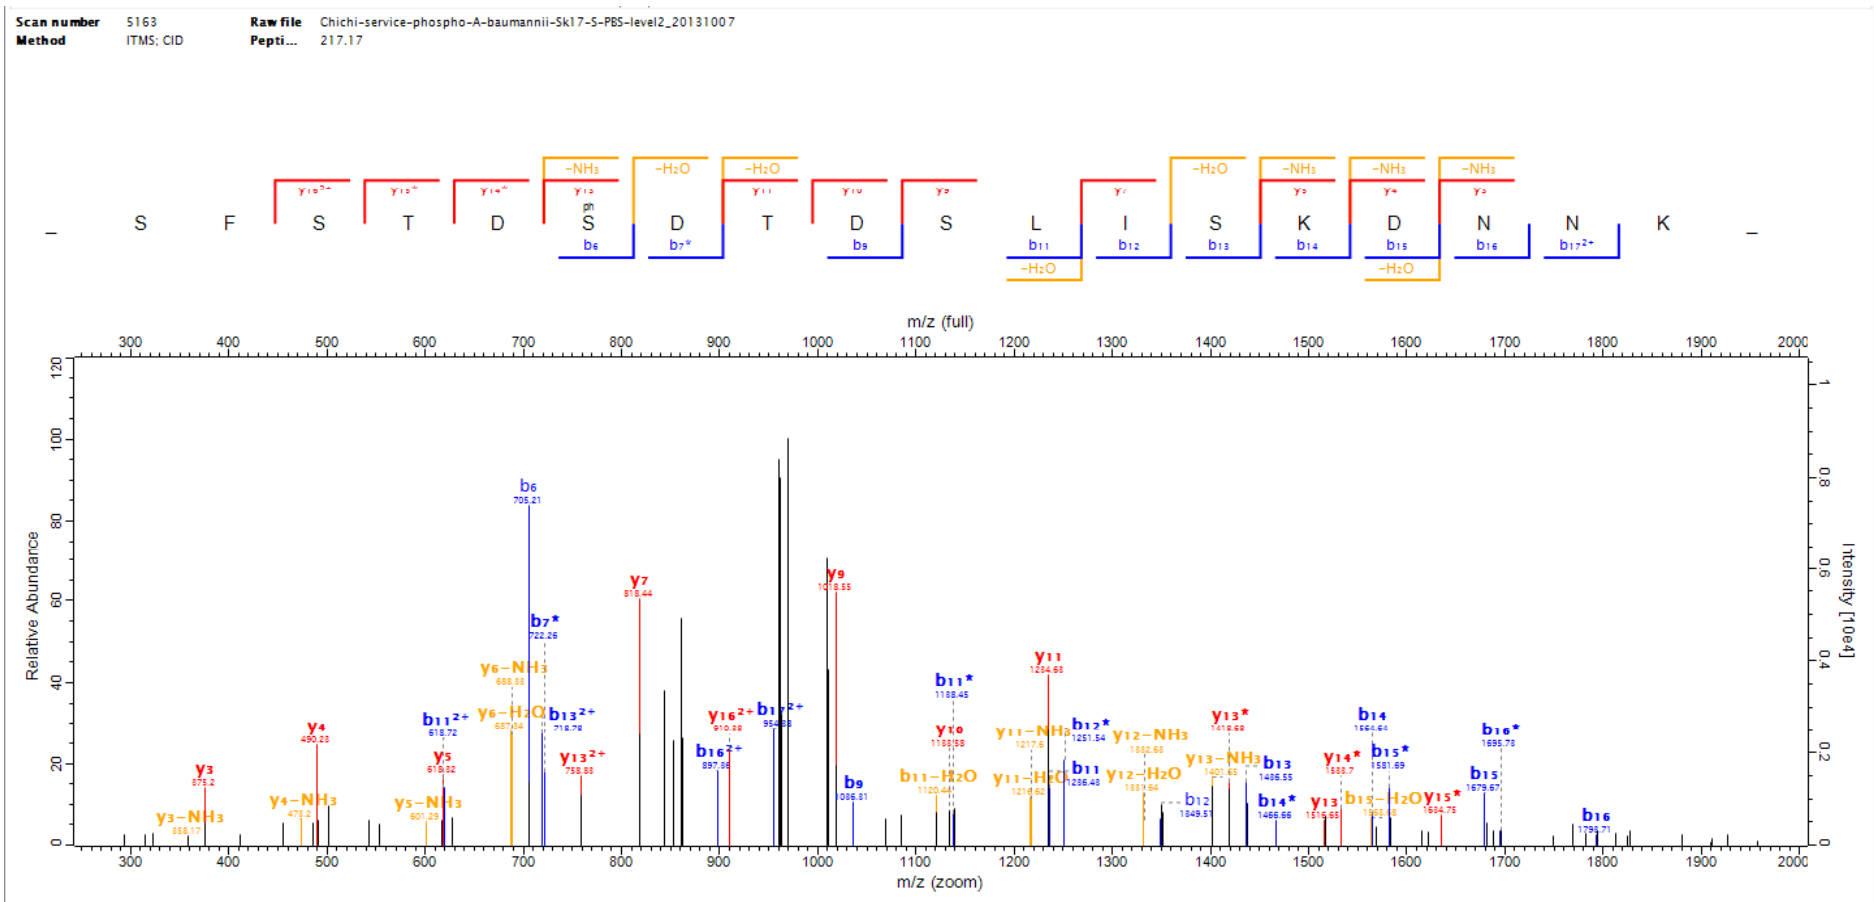

40-4

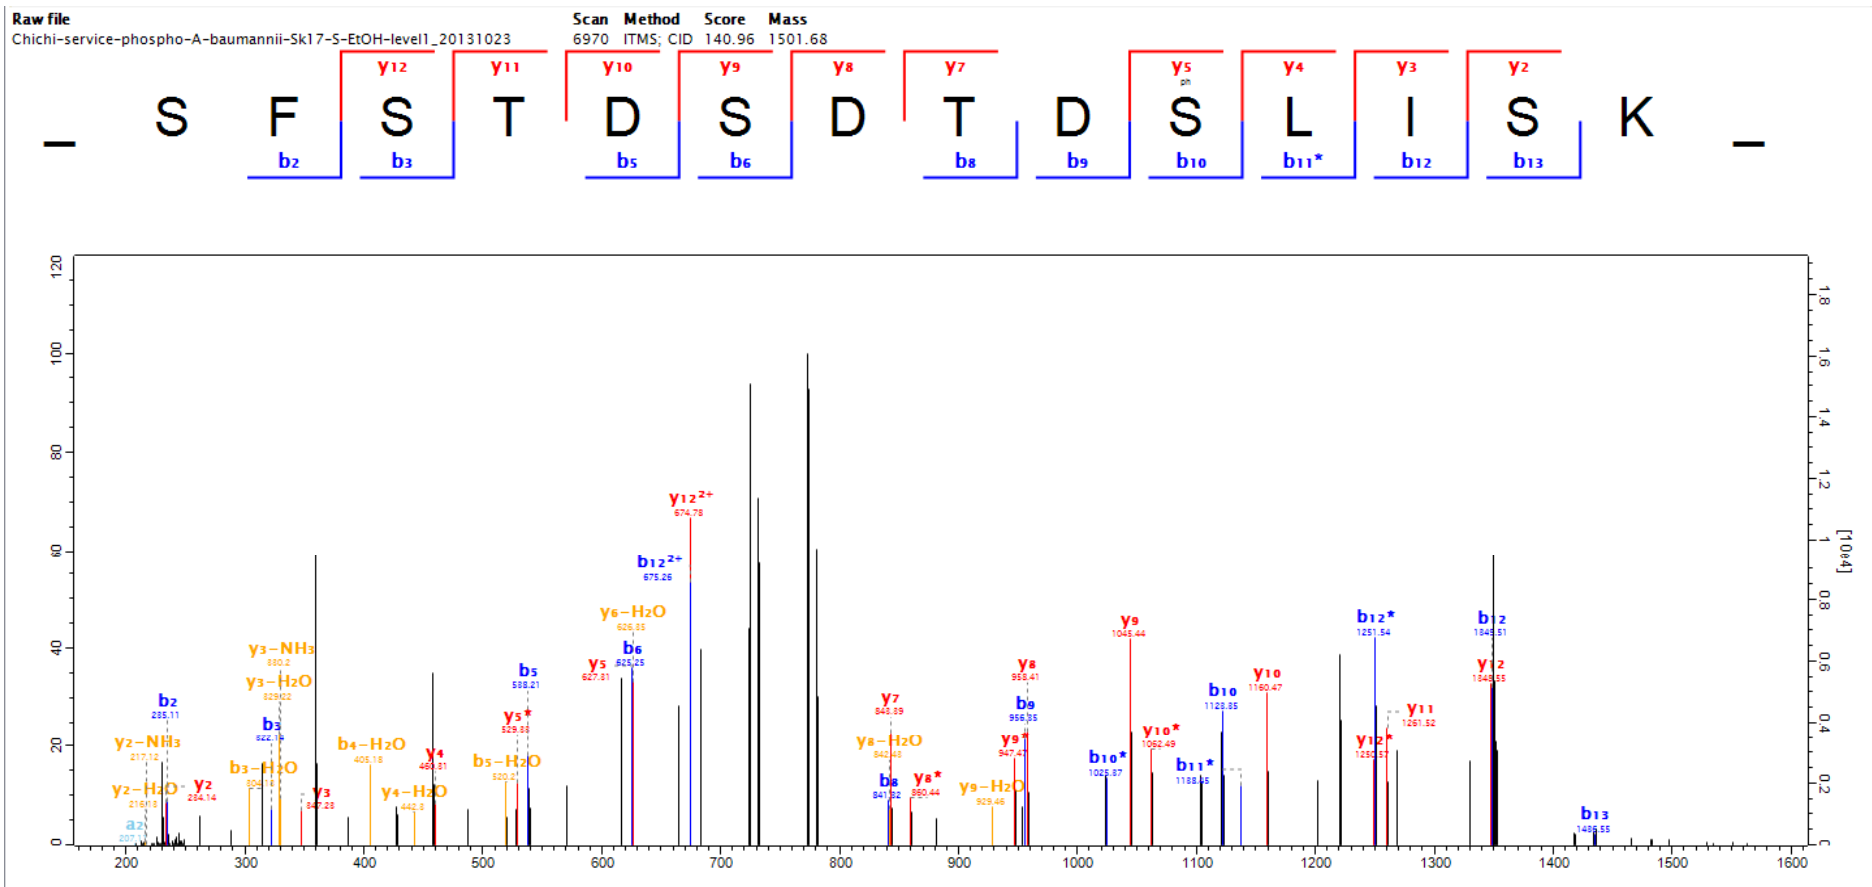

# 40-5

Scan number 7372 Raw file Chichi--service-phospho-A-baumannii-Sk17-S-EtOH-level1\_20131023  
 Method ITMS; CID Pepti... 81.9

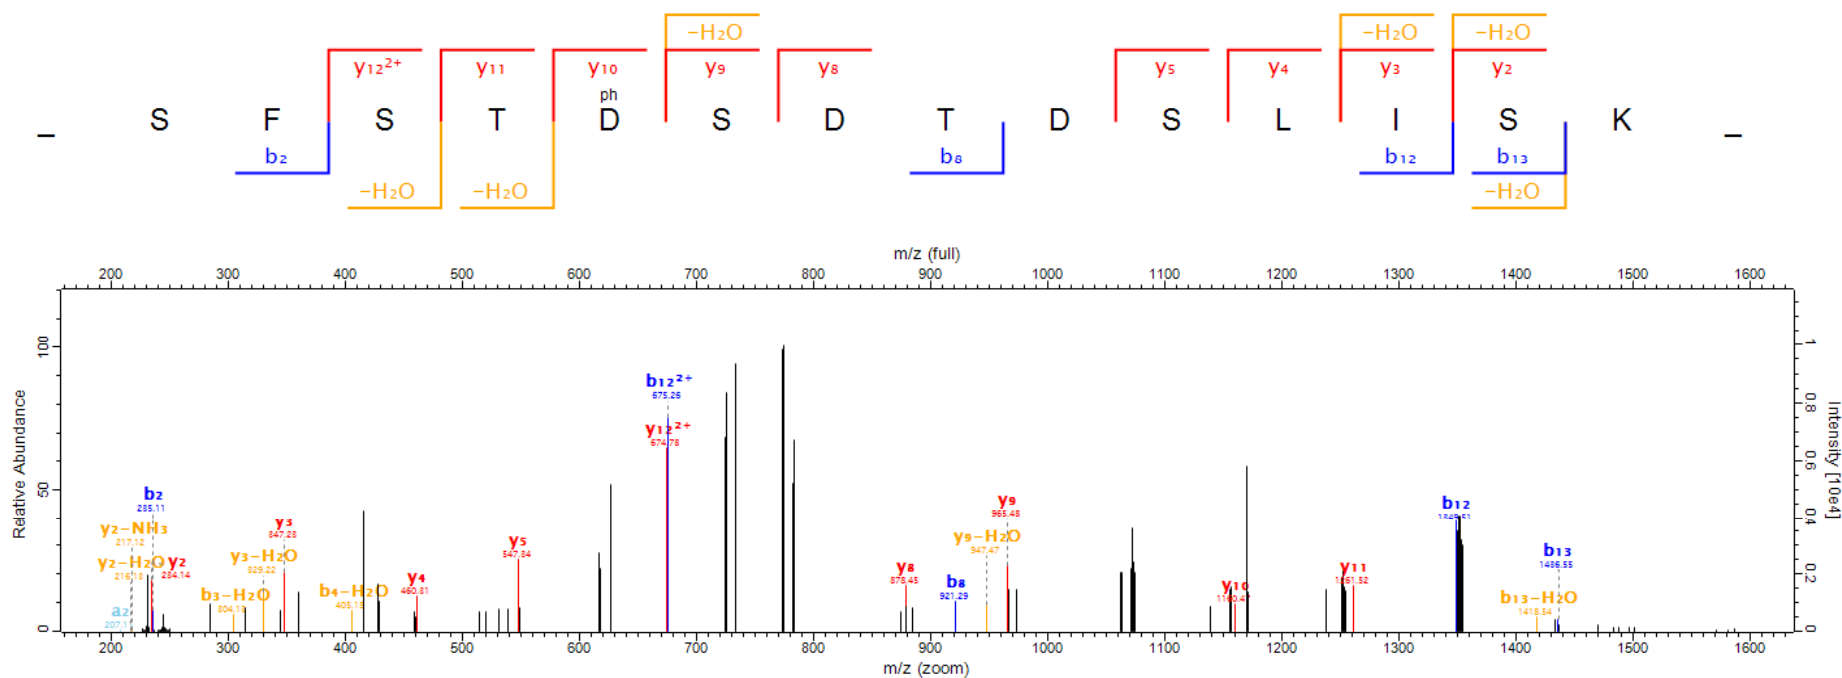

40-6

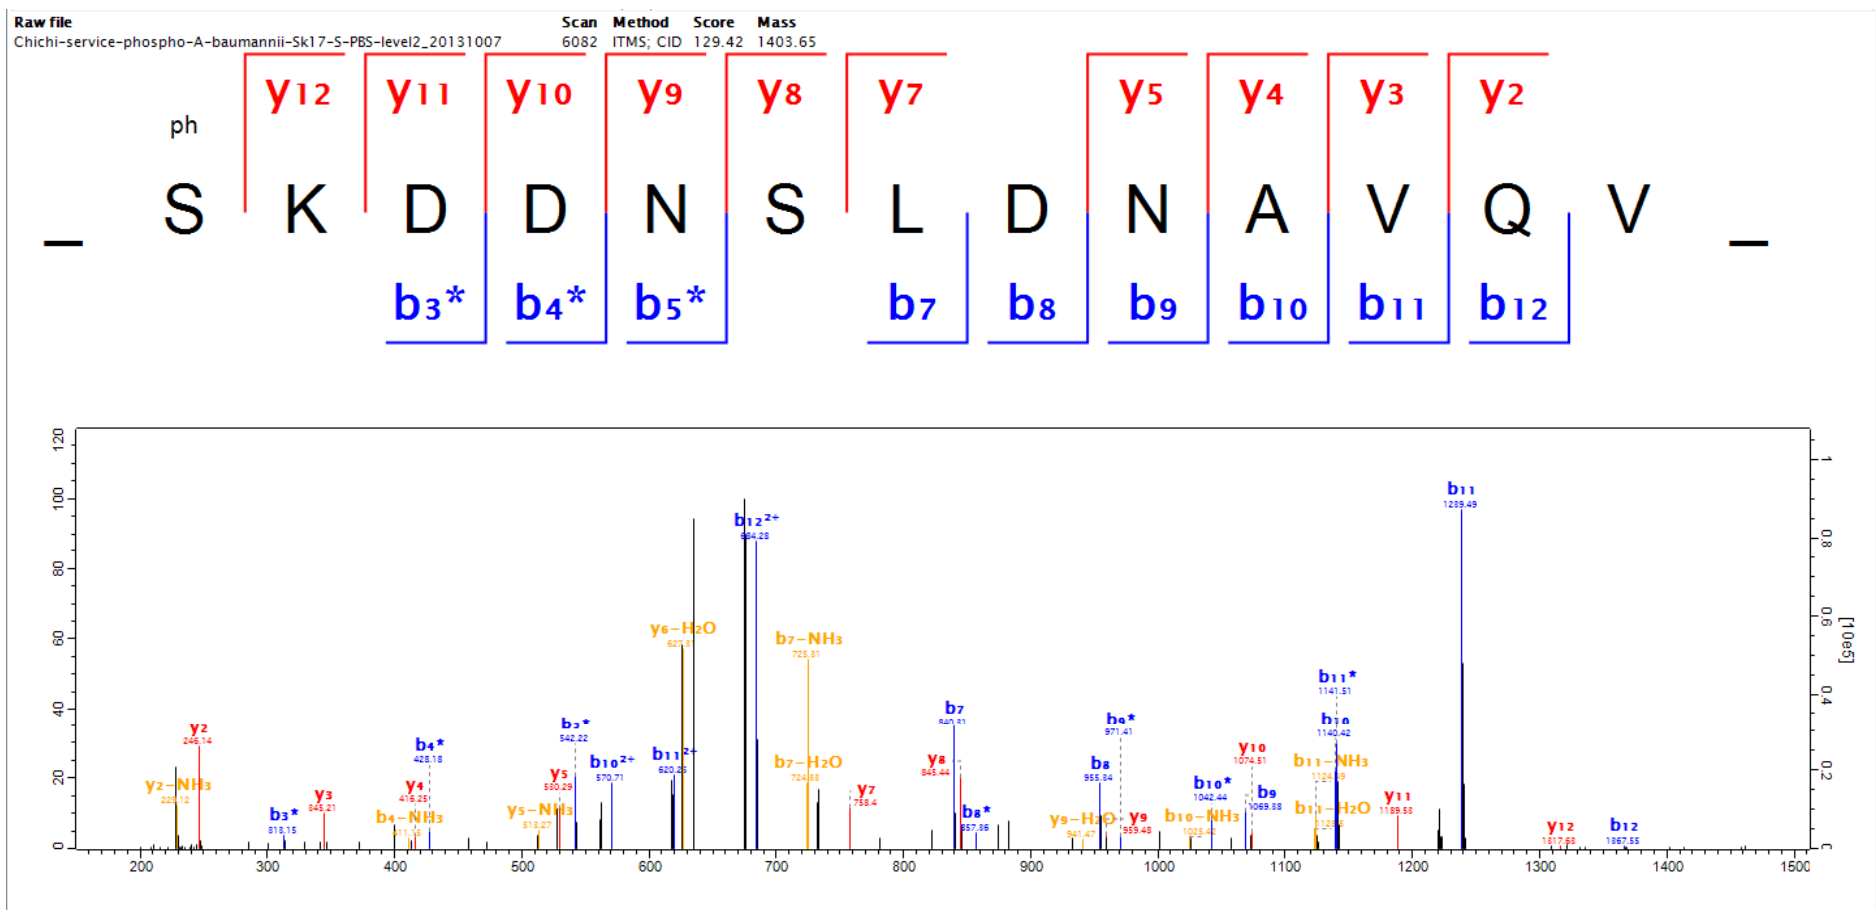

40-7

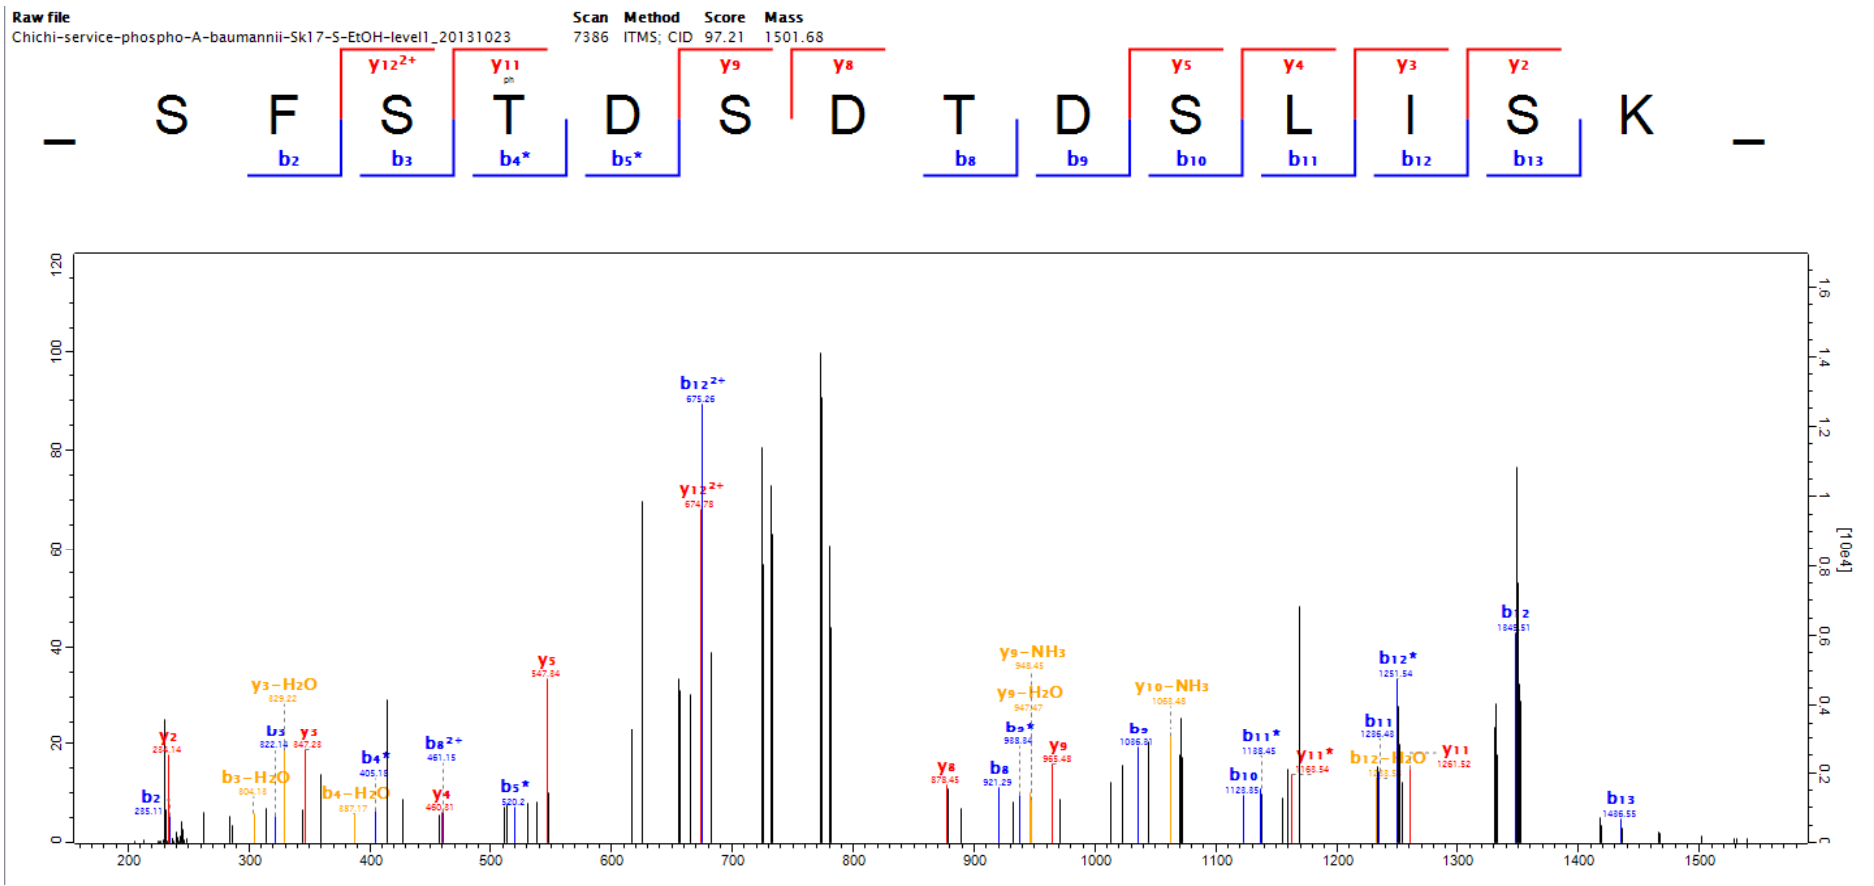

40-8

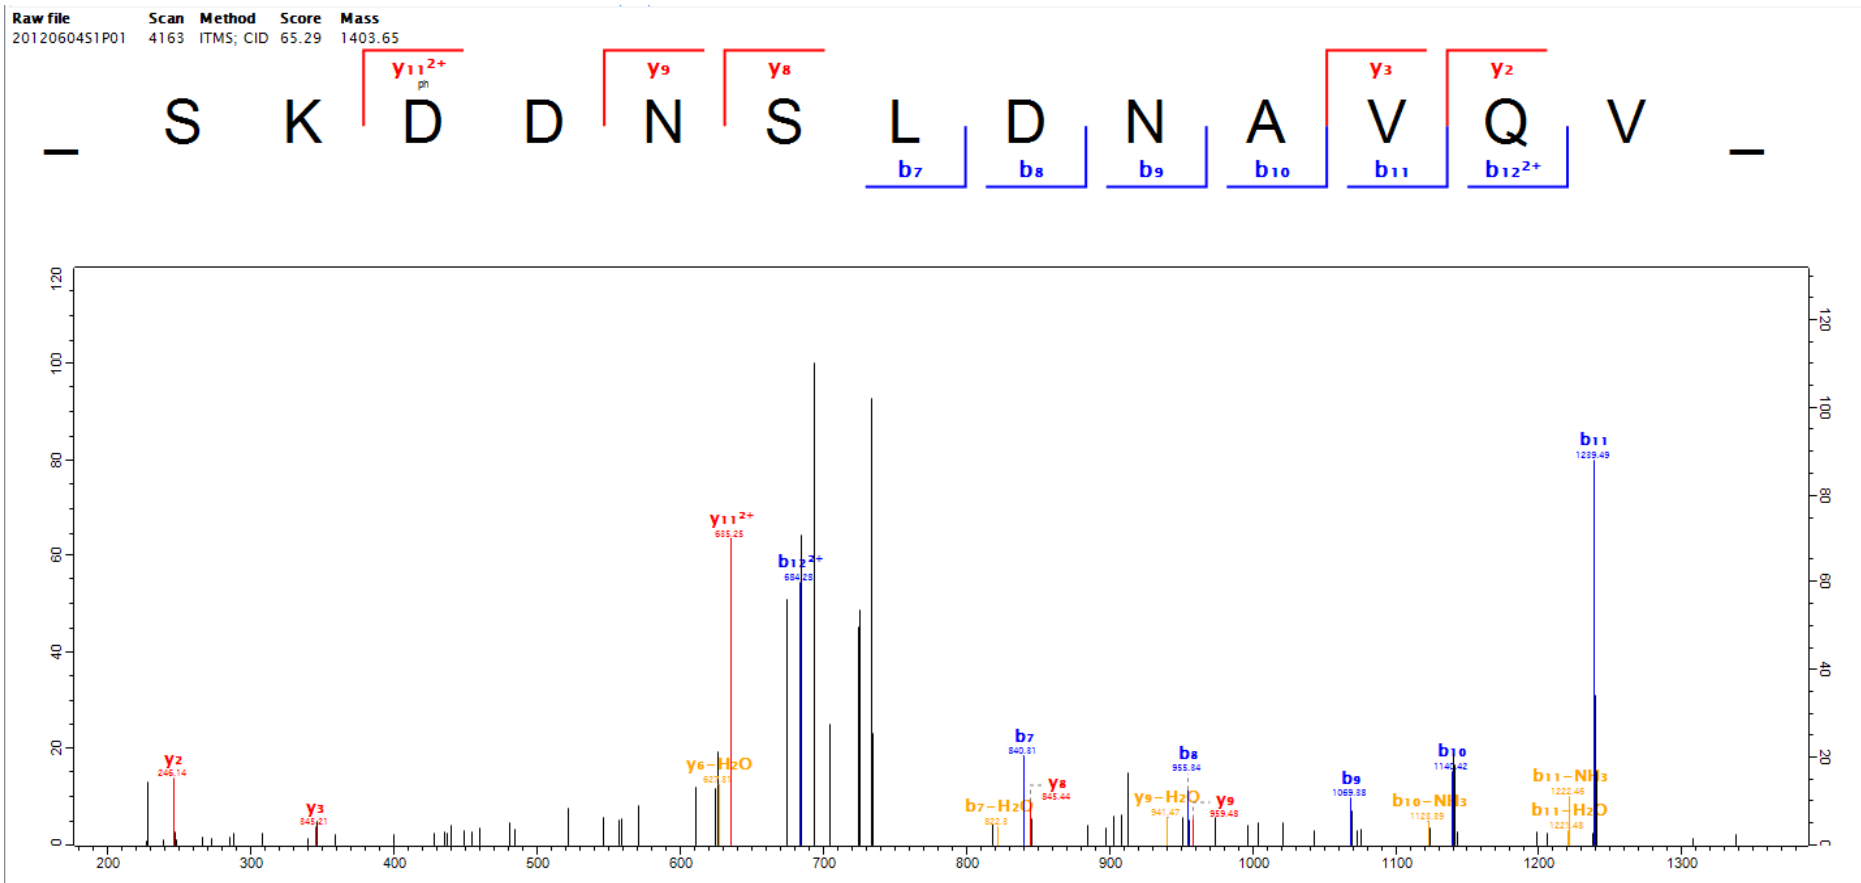



40-9

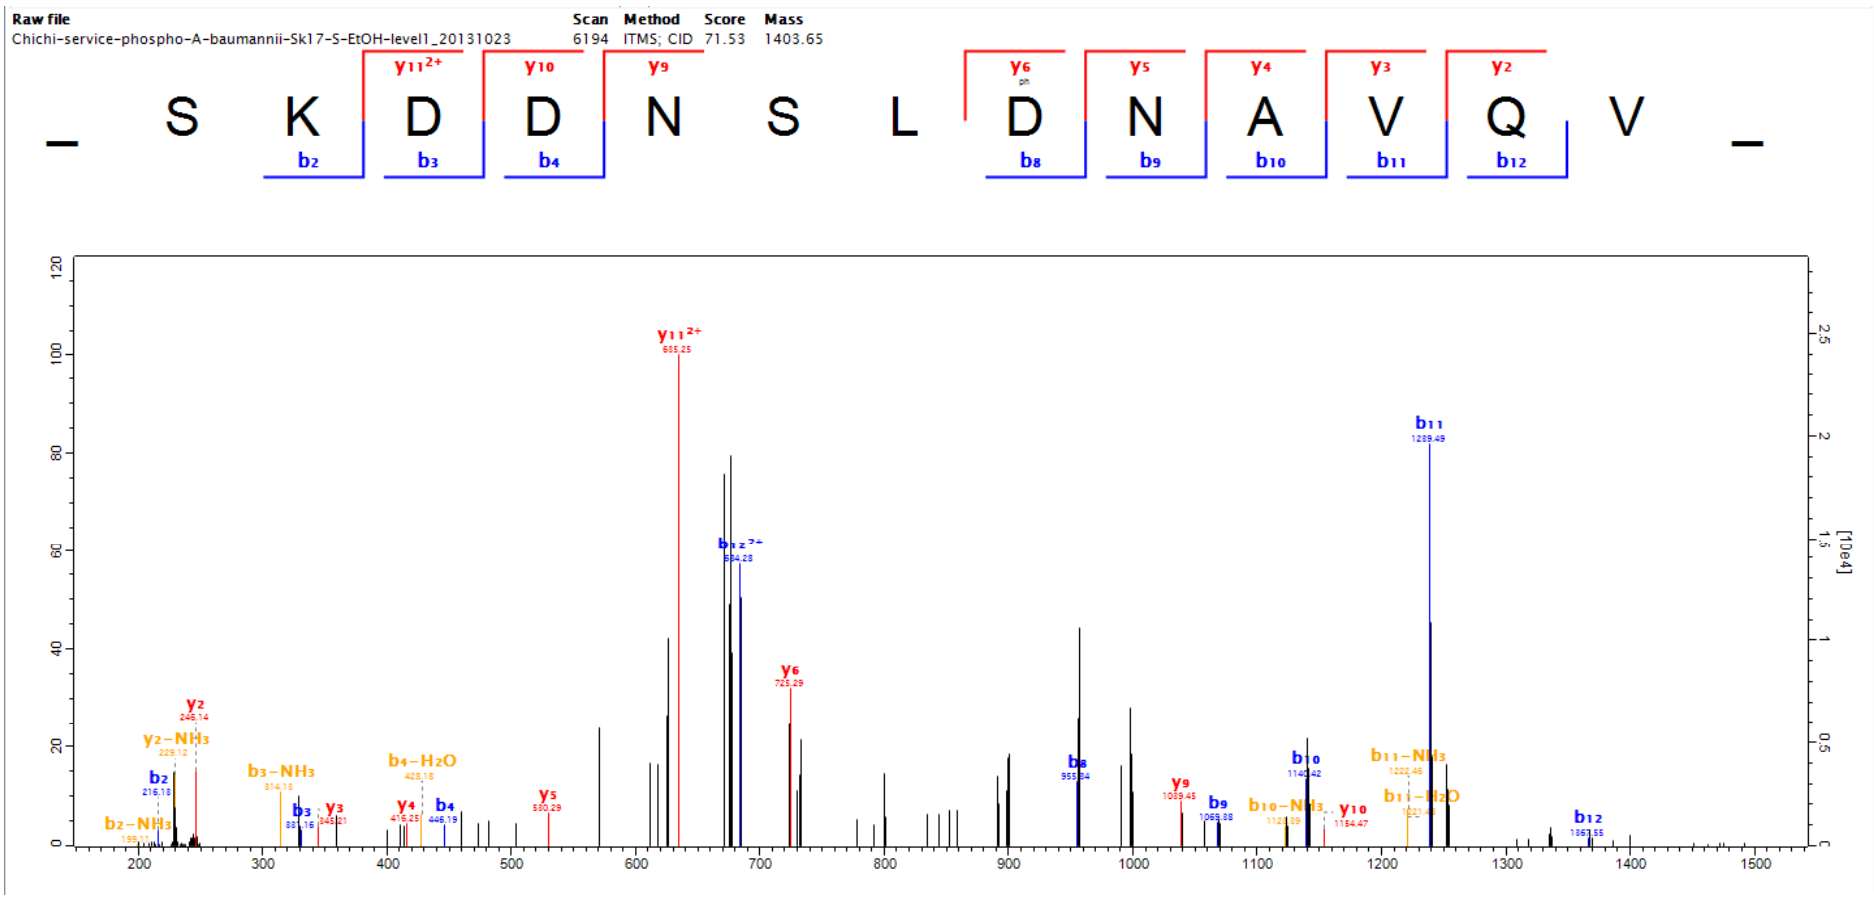

40-10

Scan number 5269 Raw file Chichi-service-phospho-A-baumannii-Sk17-S-EtOH-level2\_20131007  
 Method ITMS: CID Pepti... 81.66

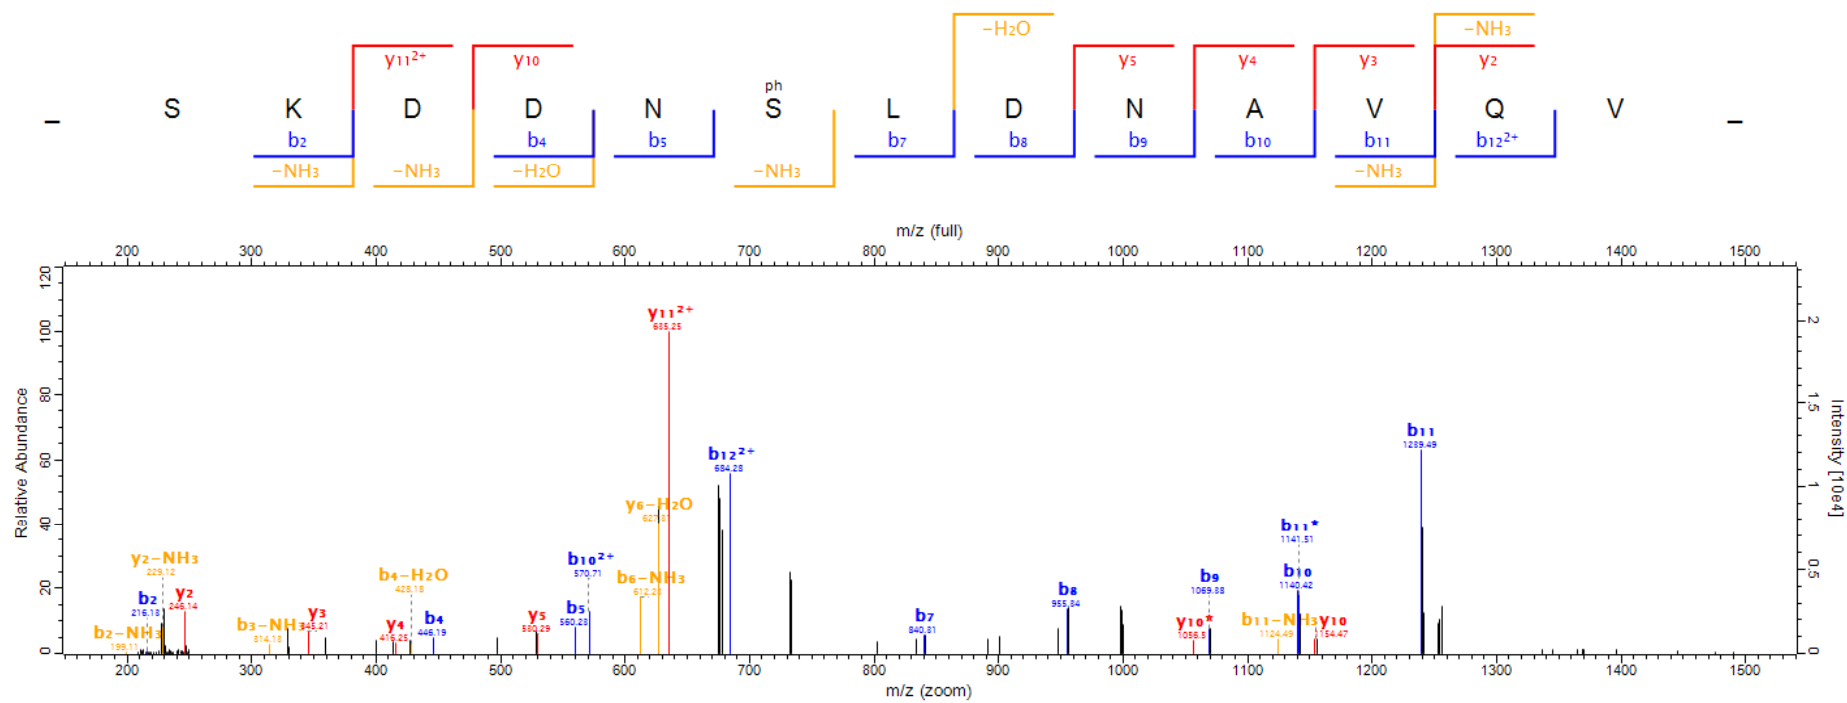

41-1

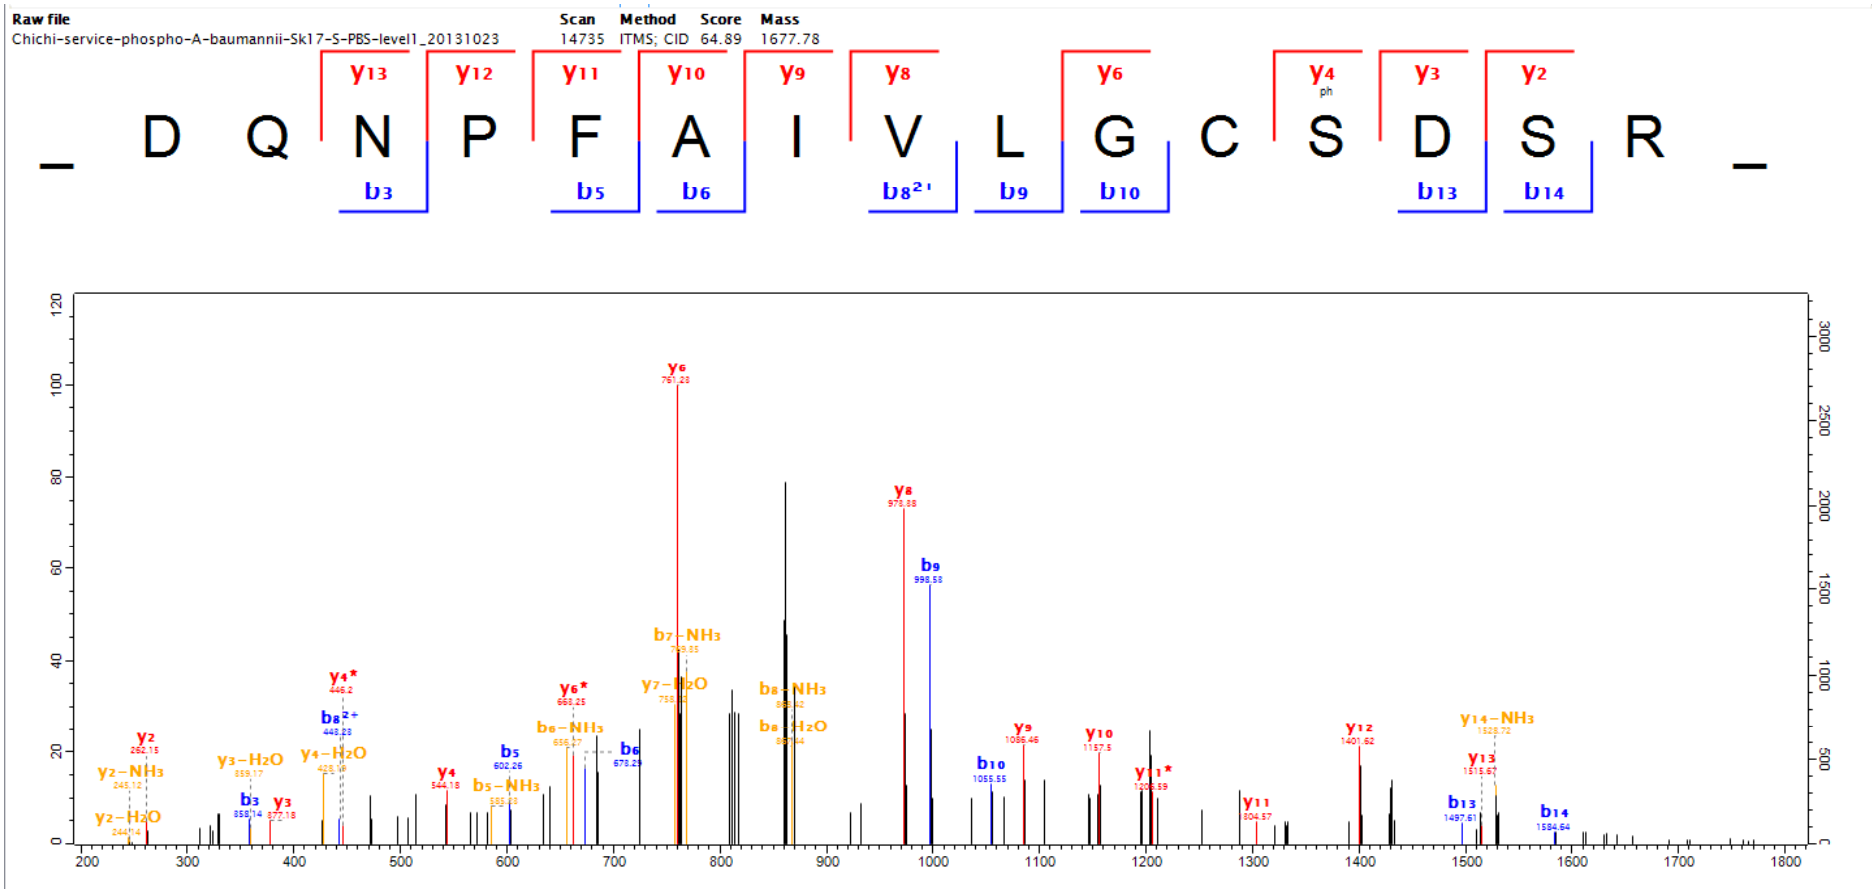

41-2

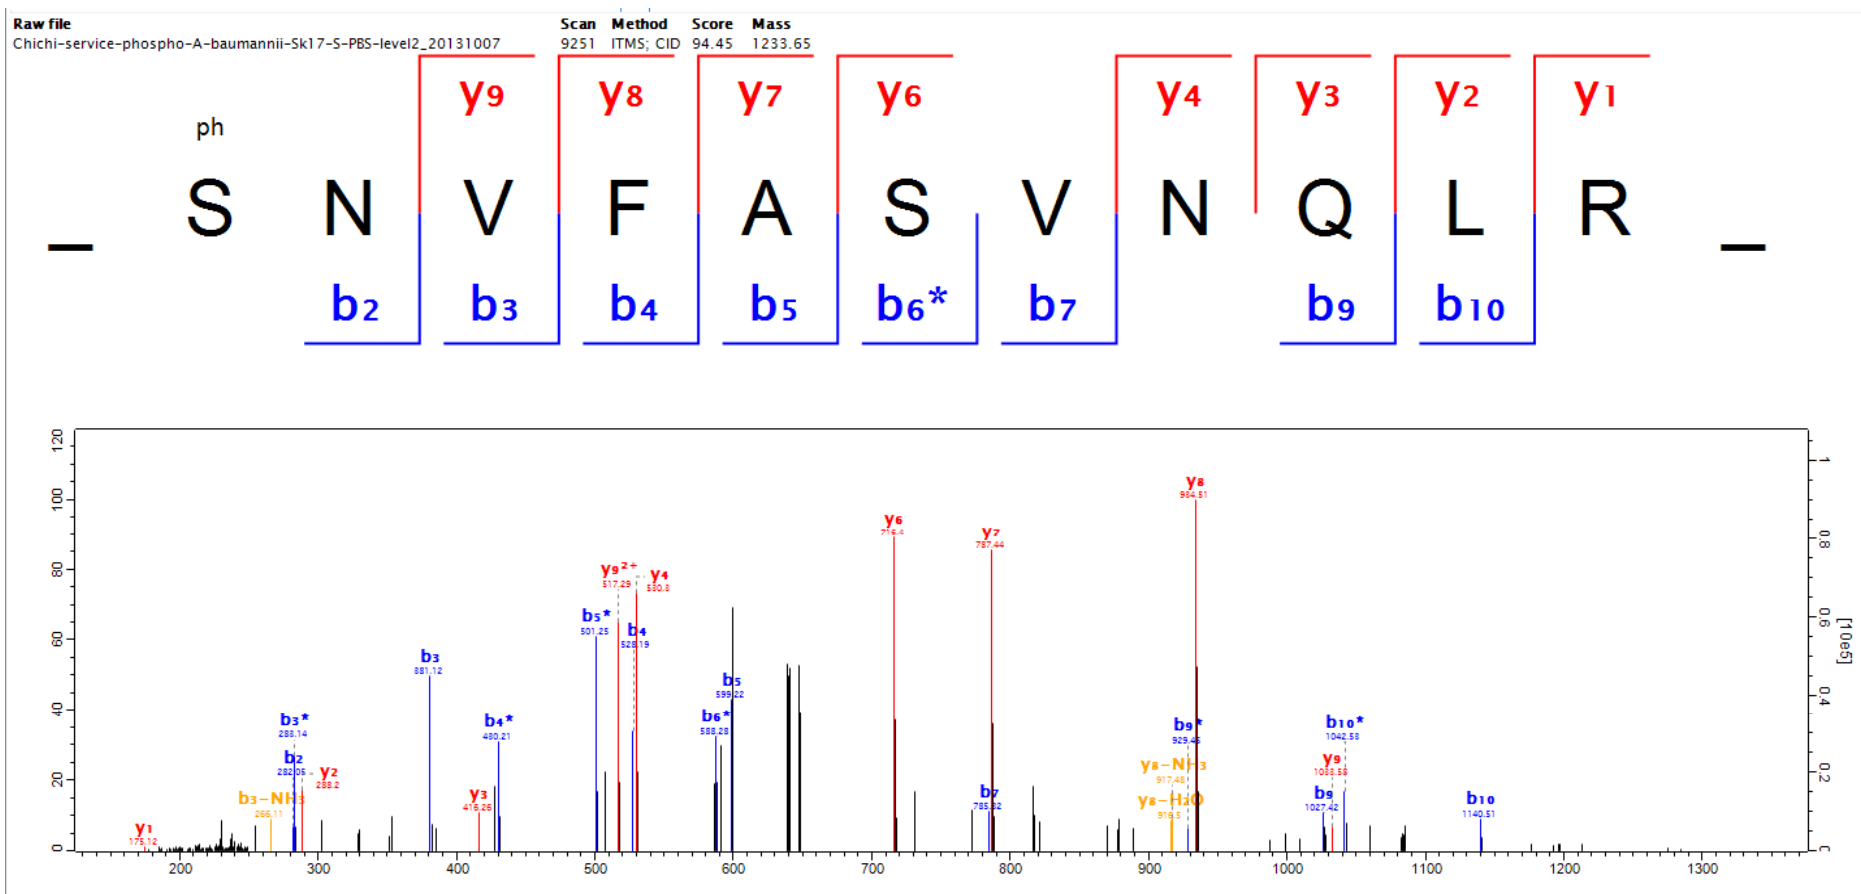

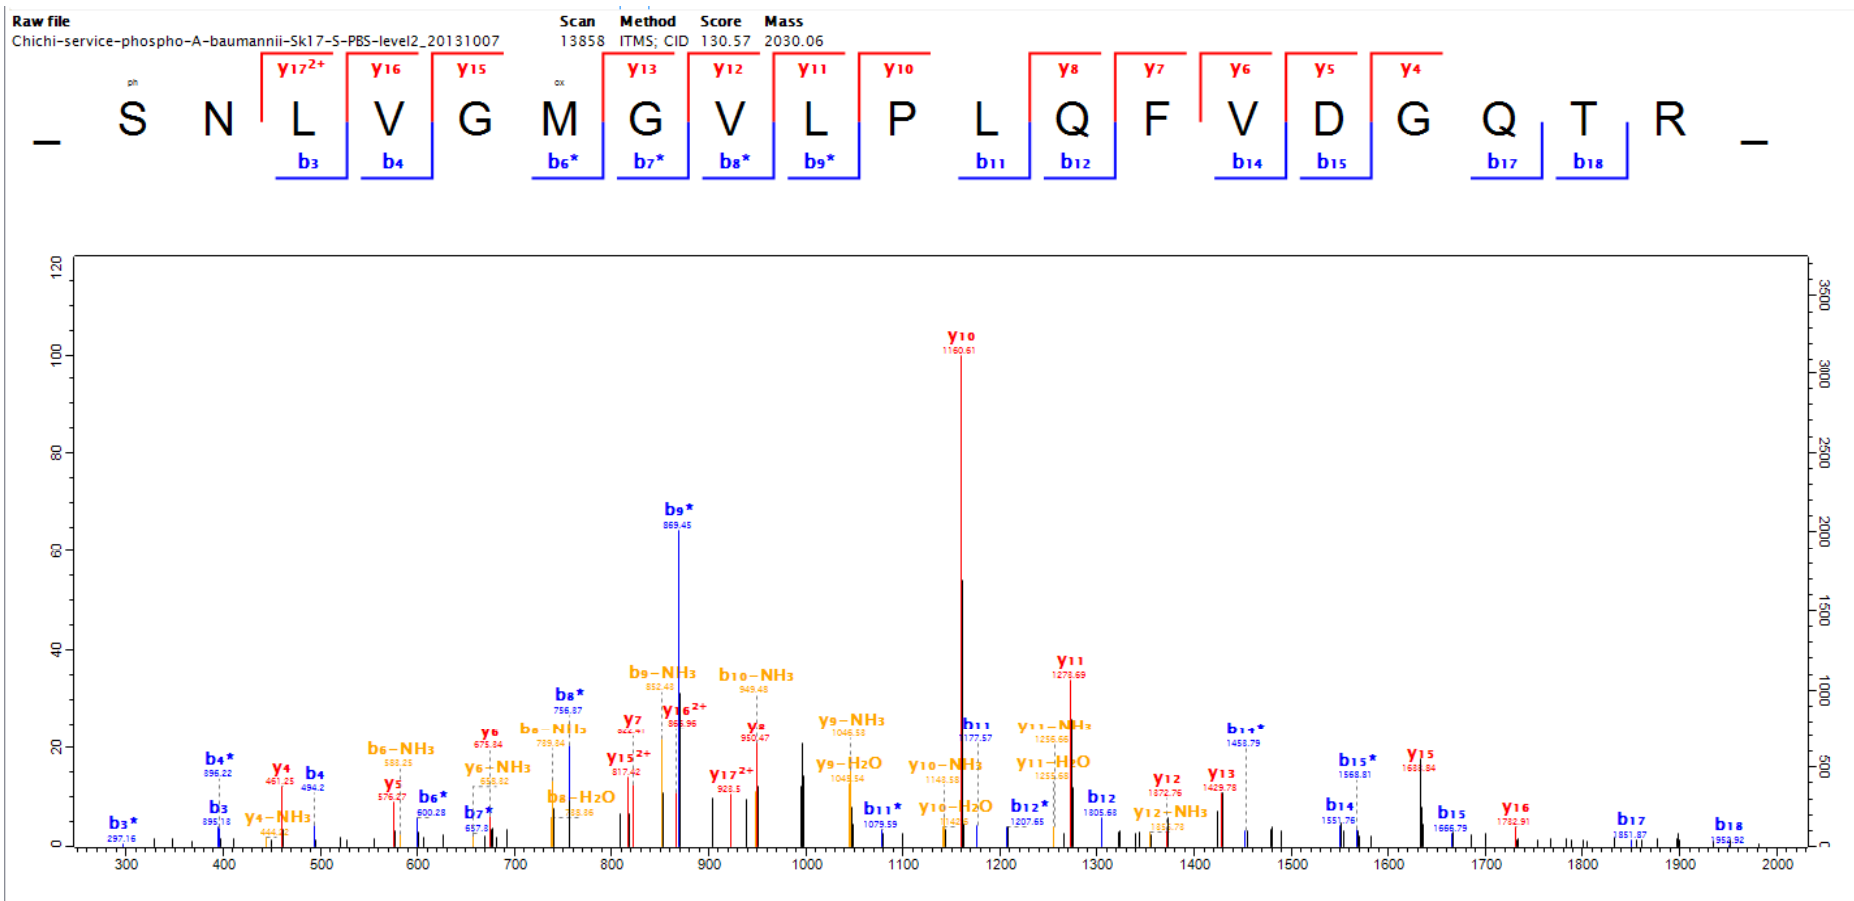

43-1

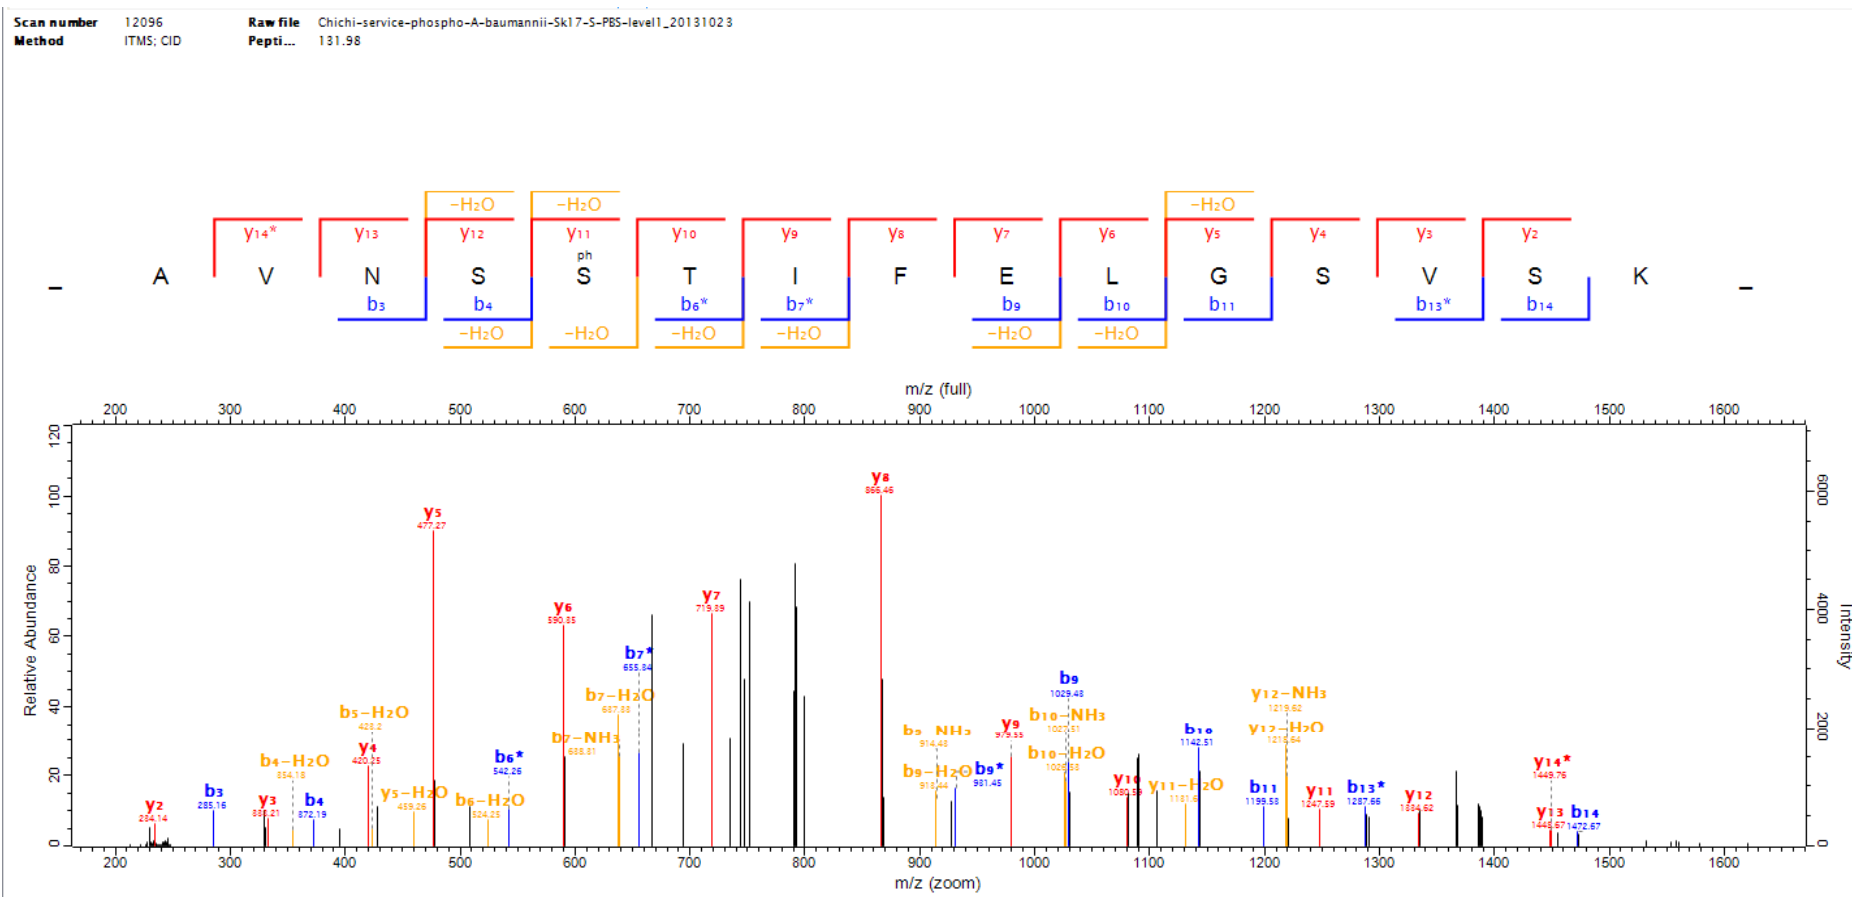

43-2

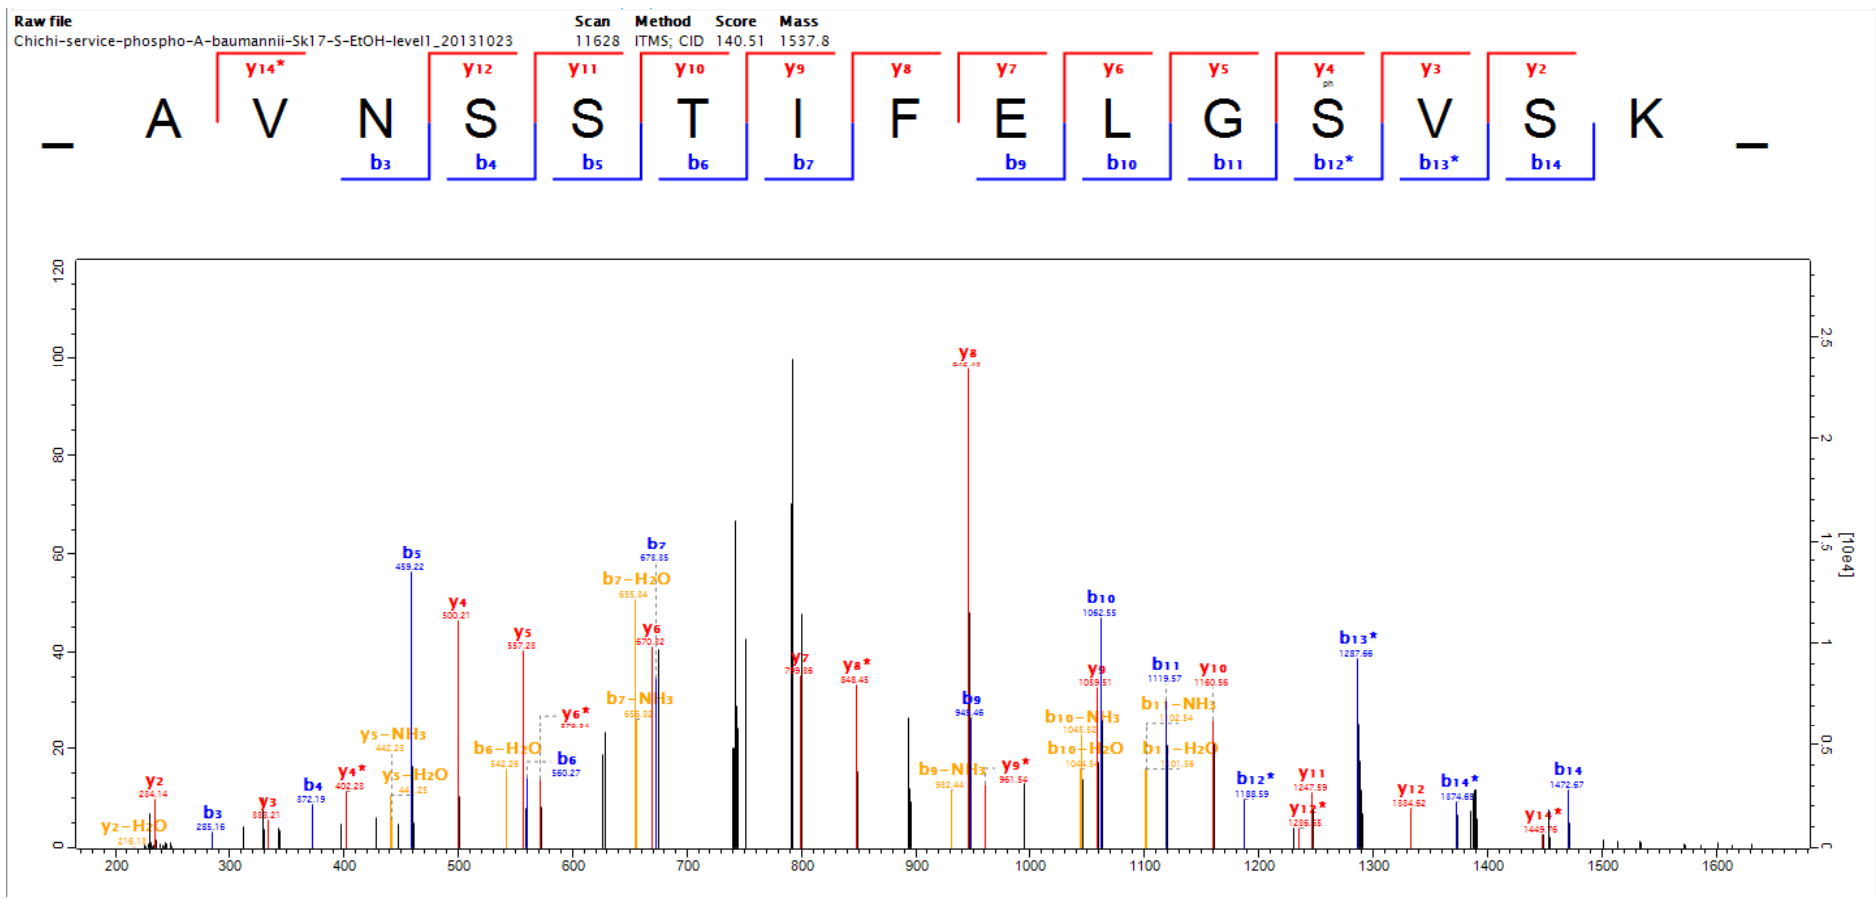

43-3

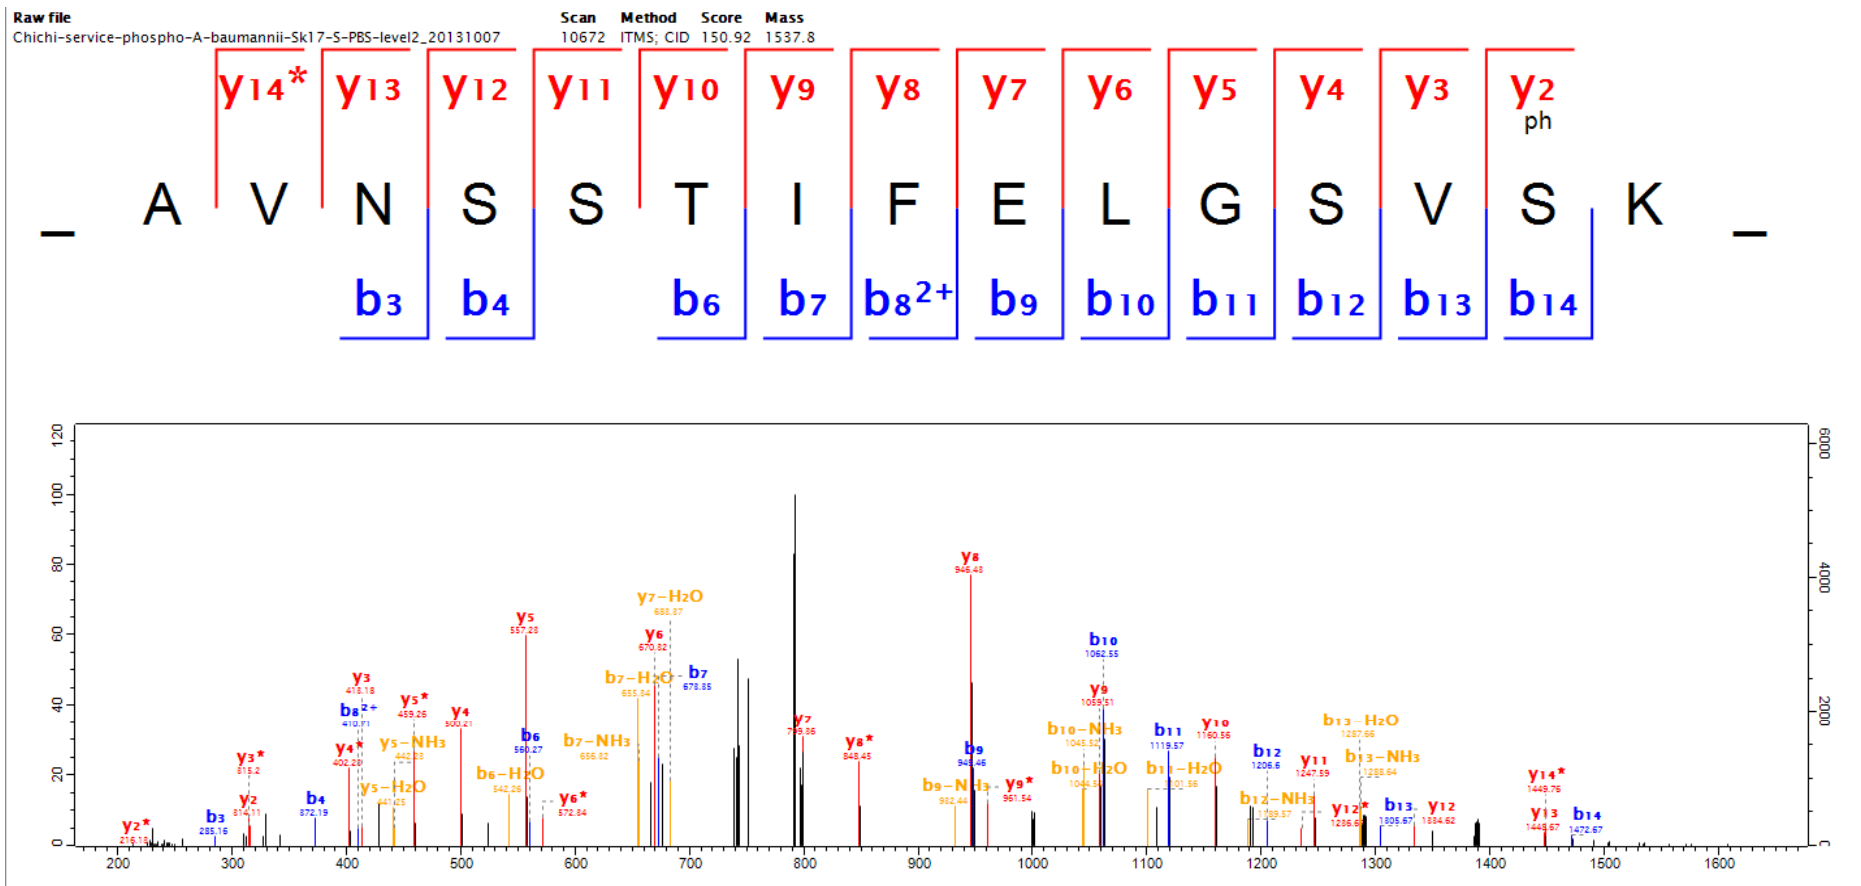



43-4

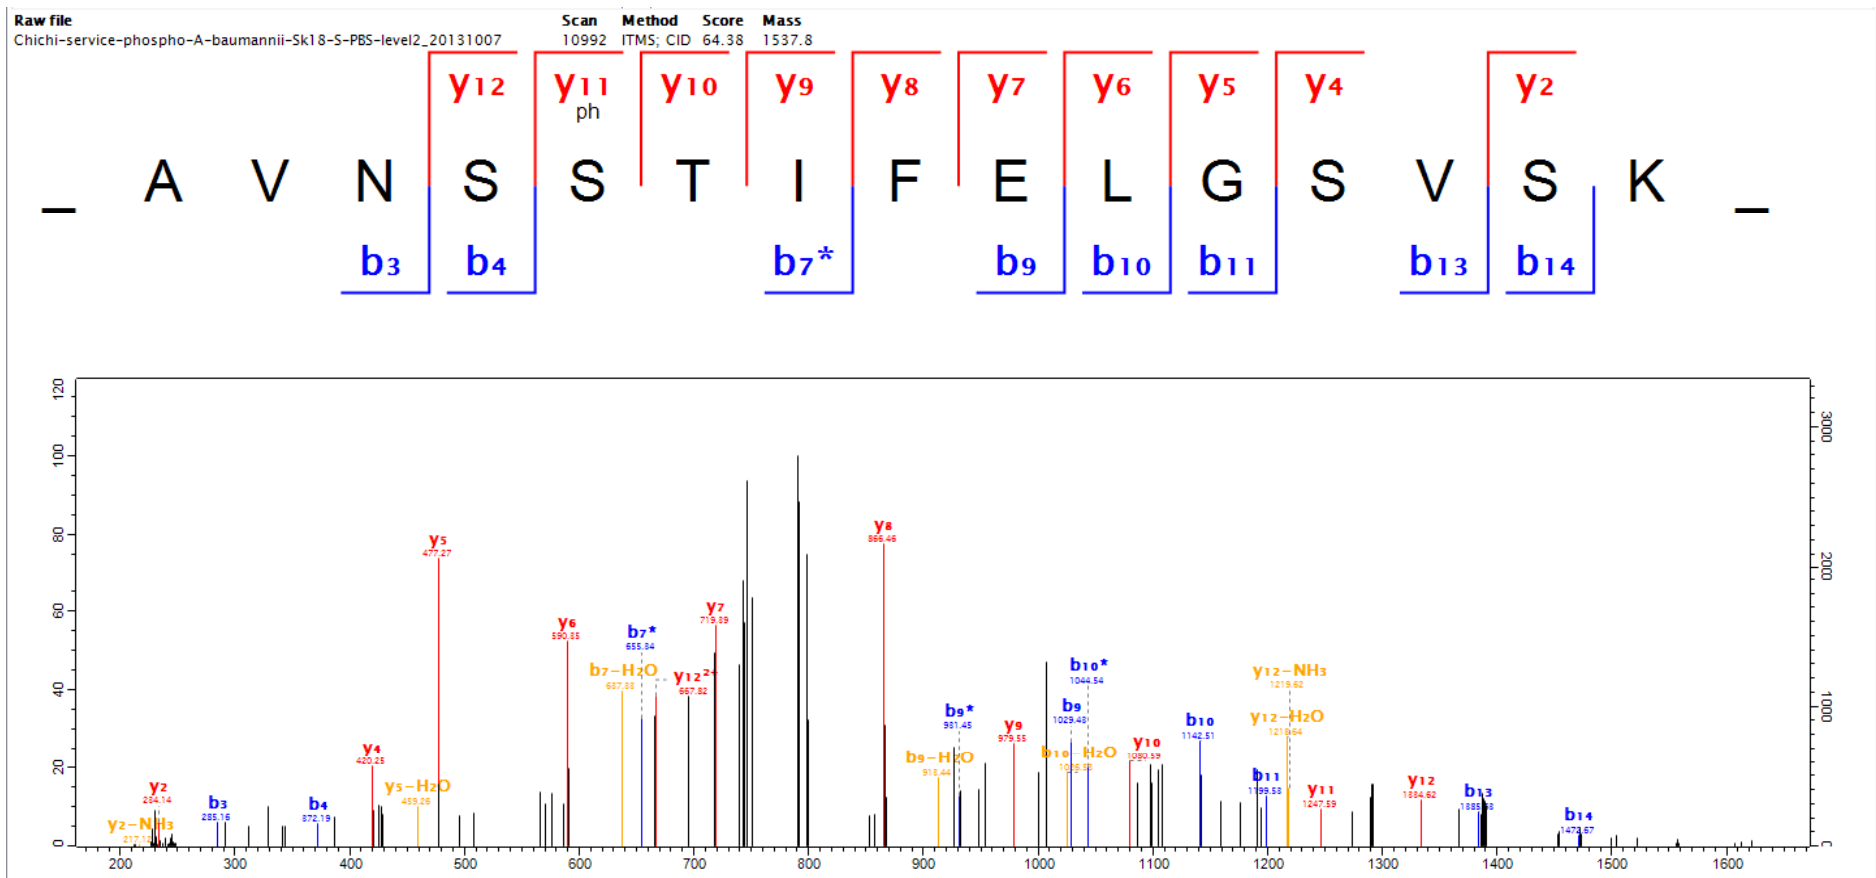

43-5

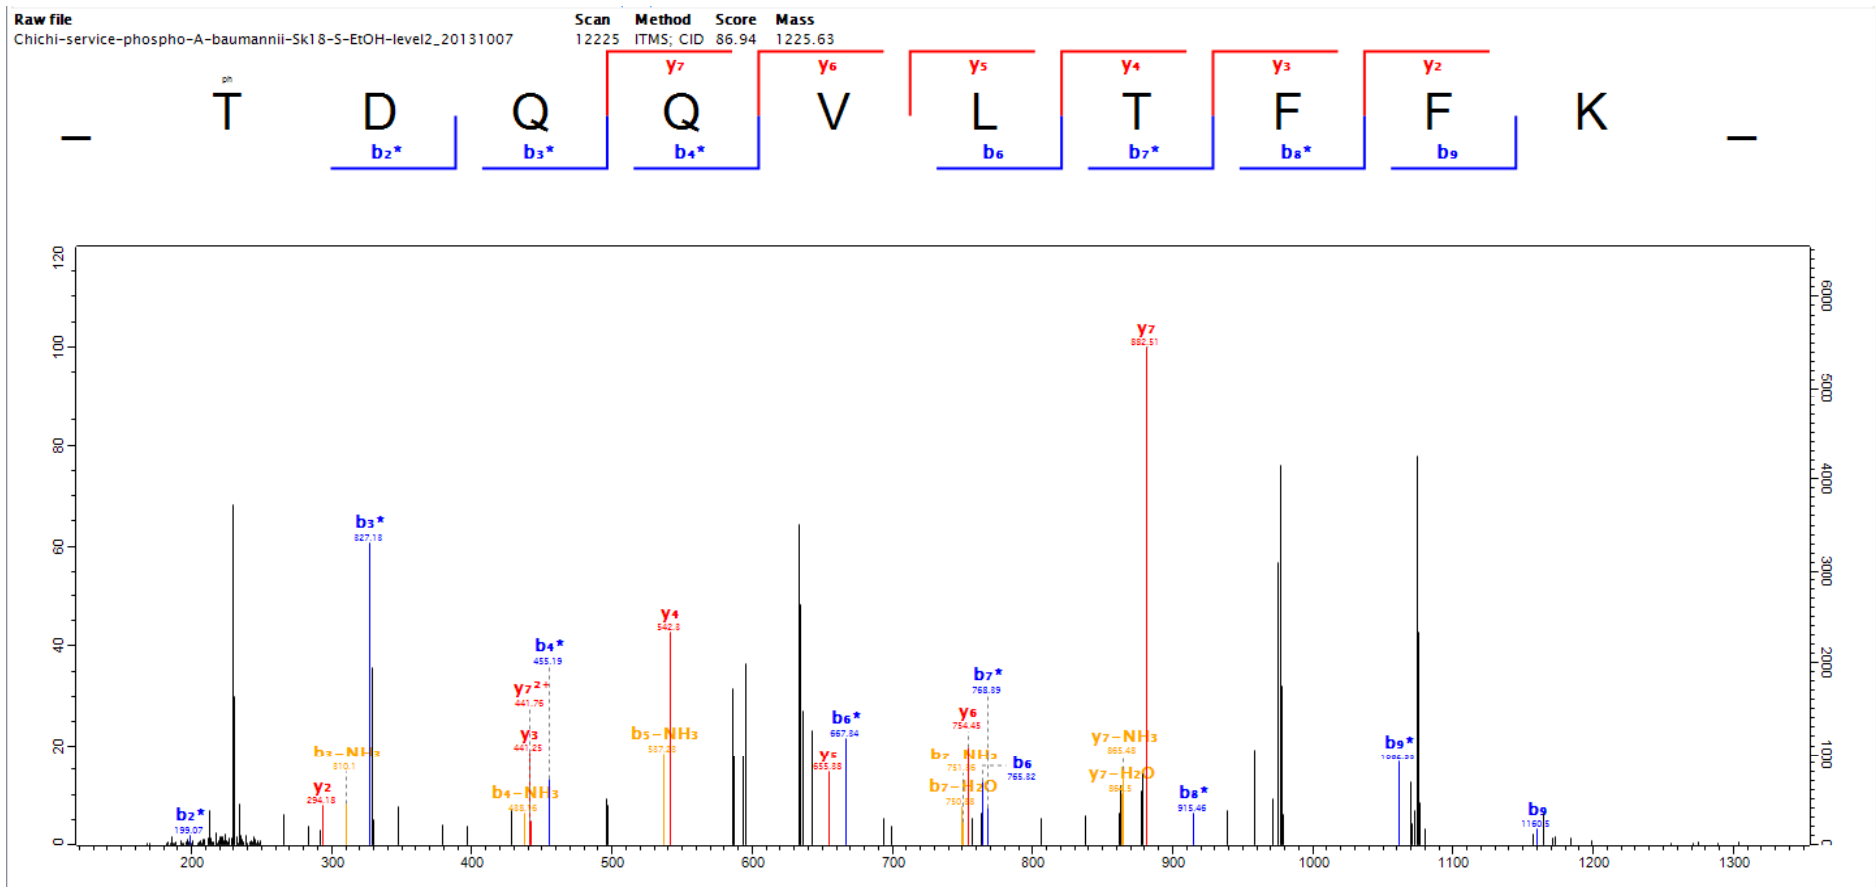

43-6

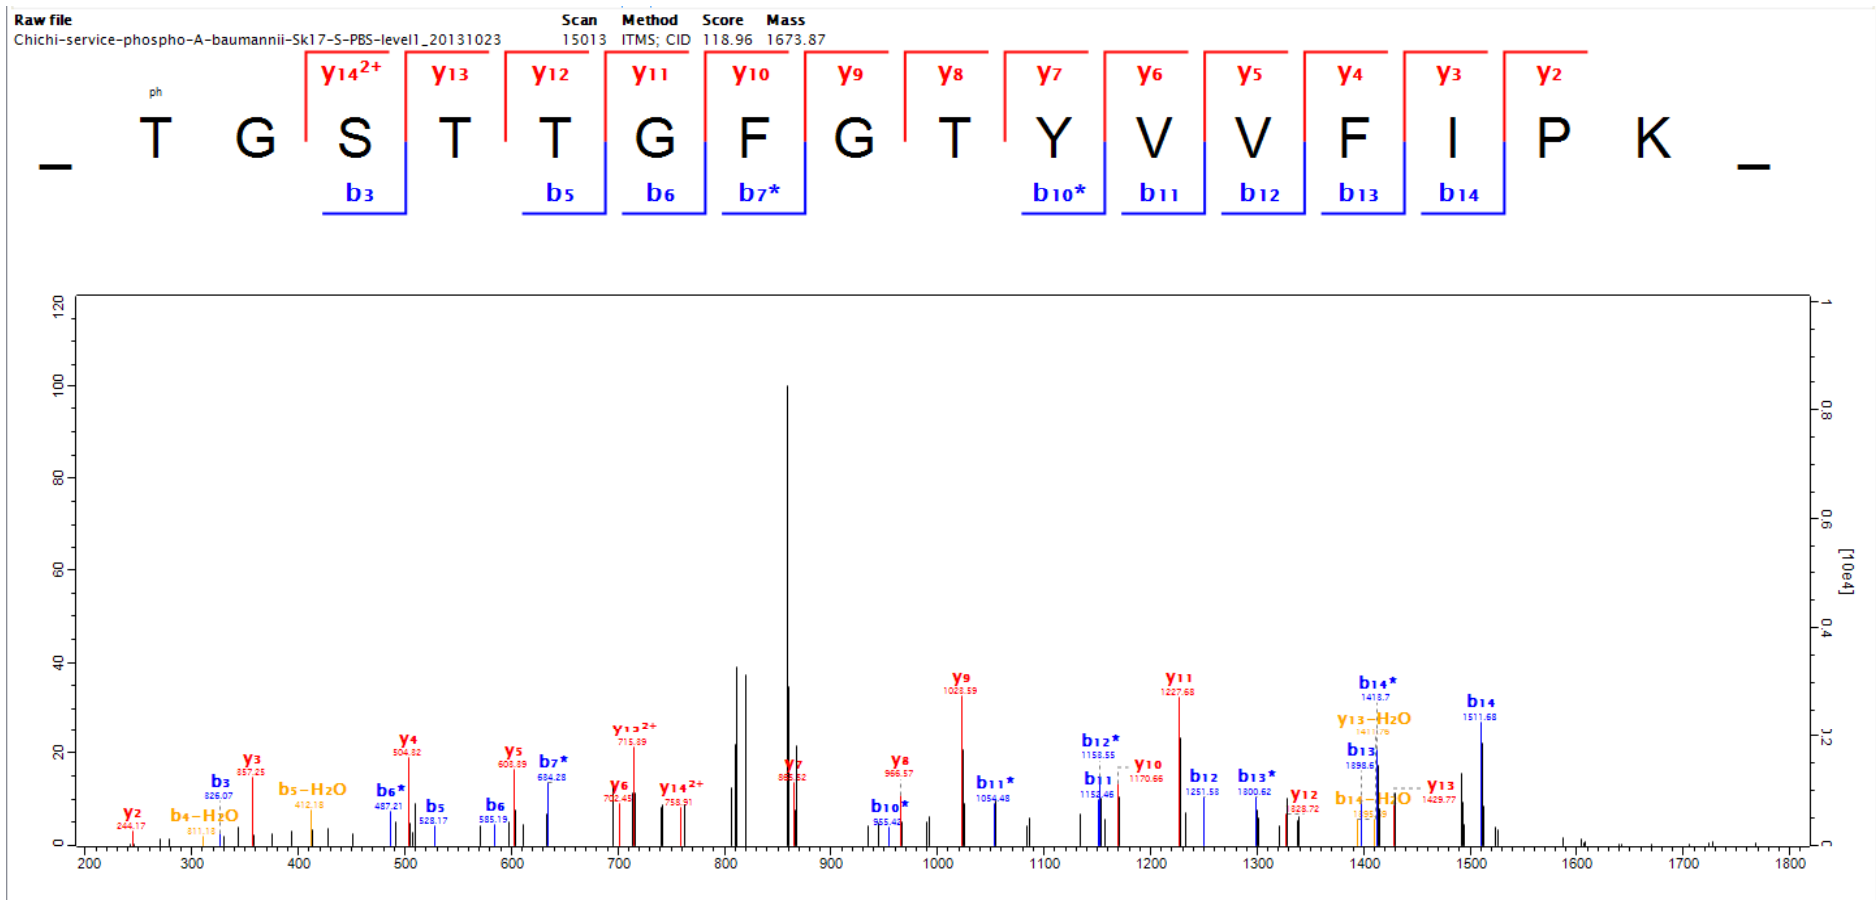

43-7

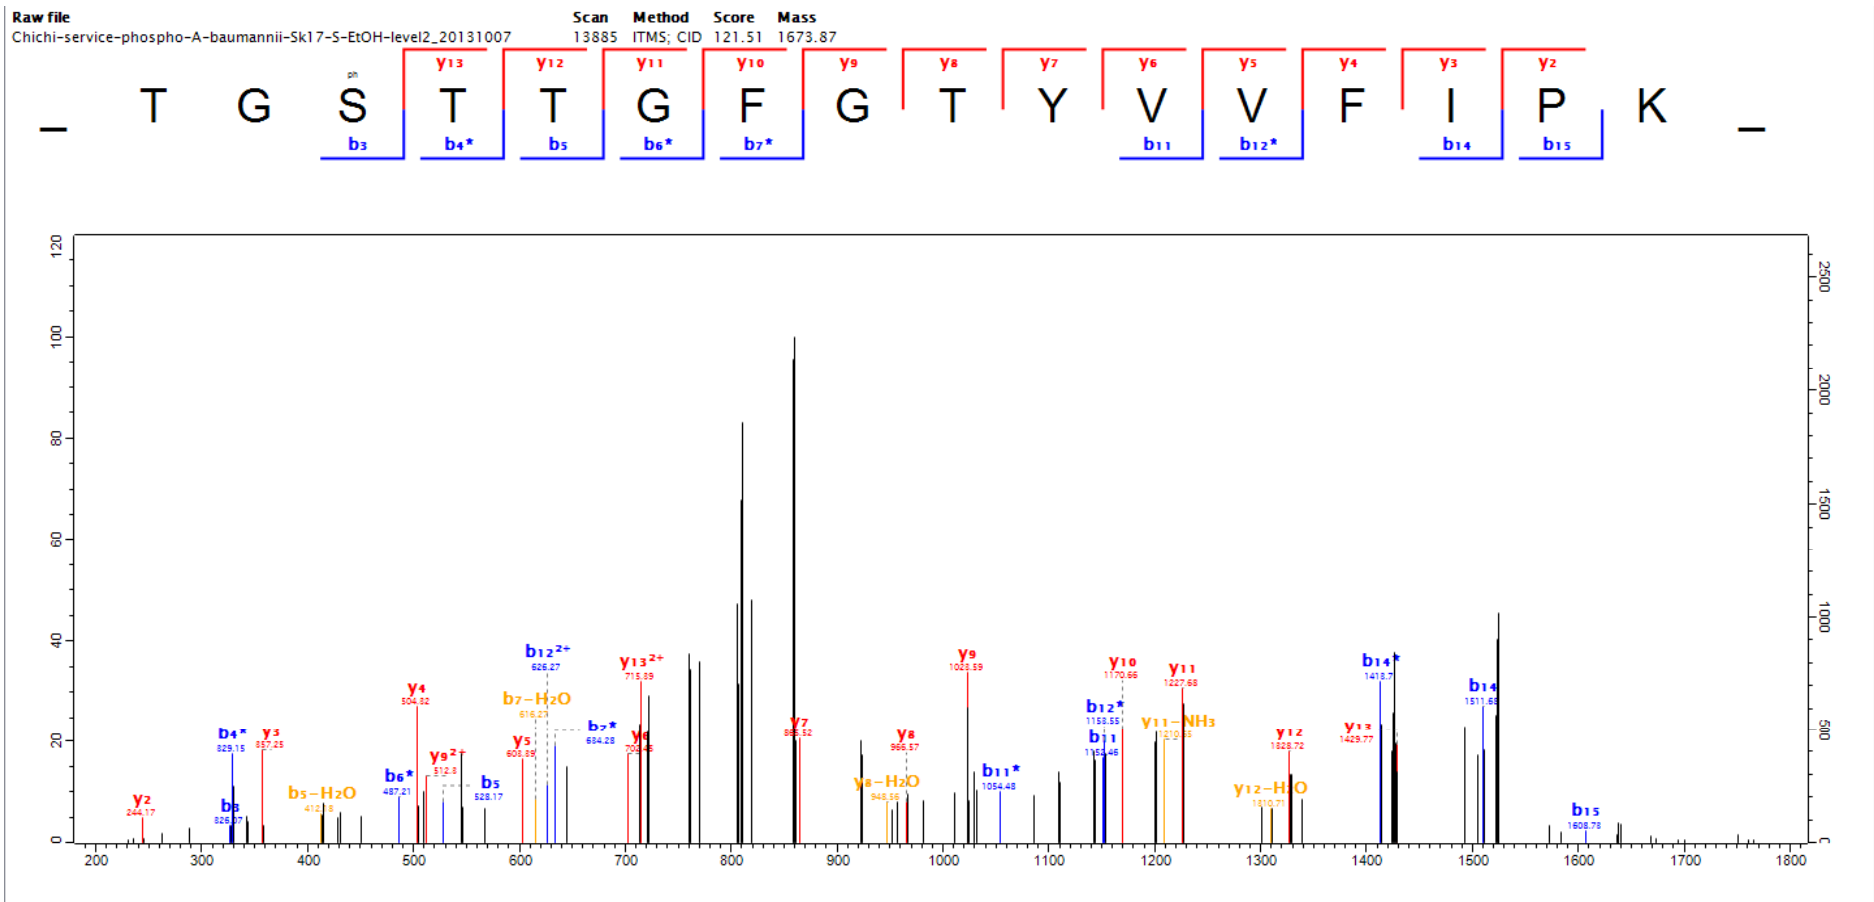

43-8

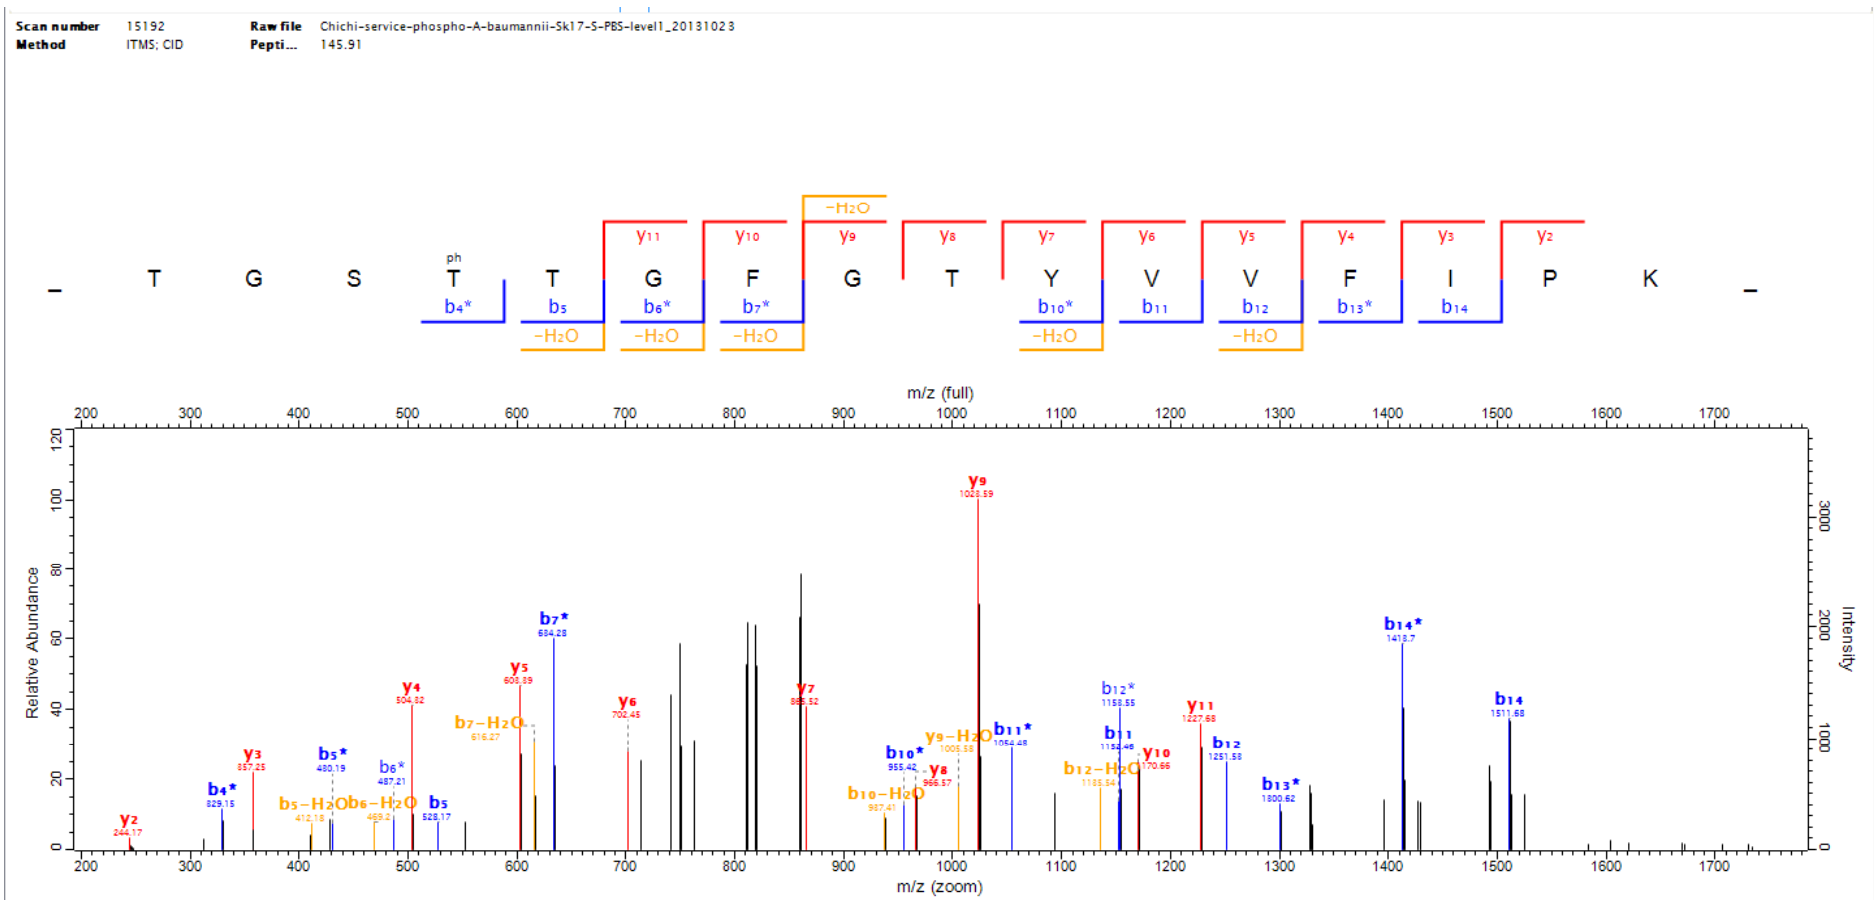

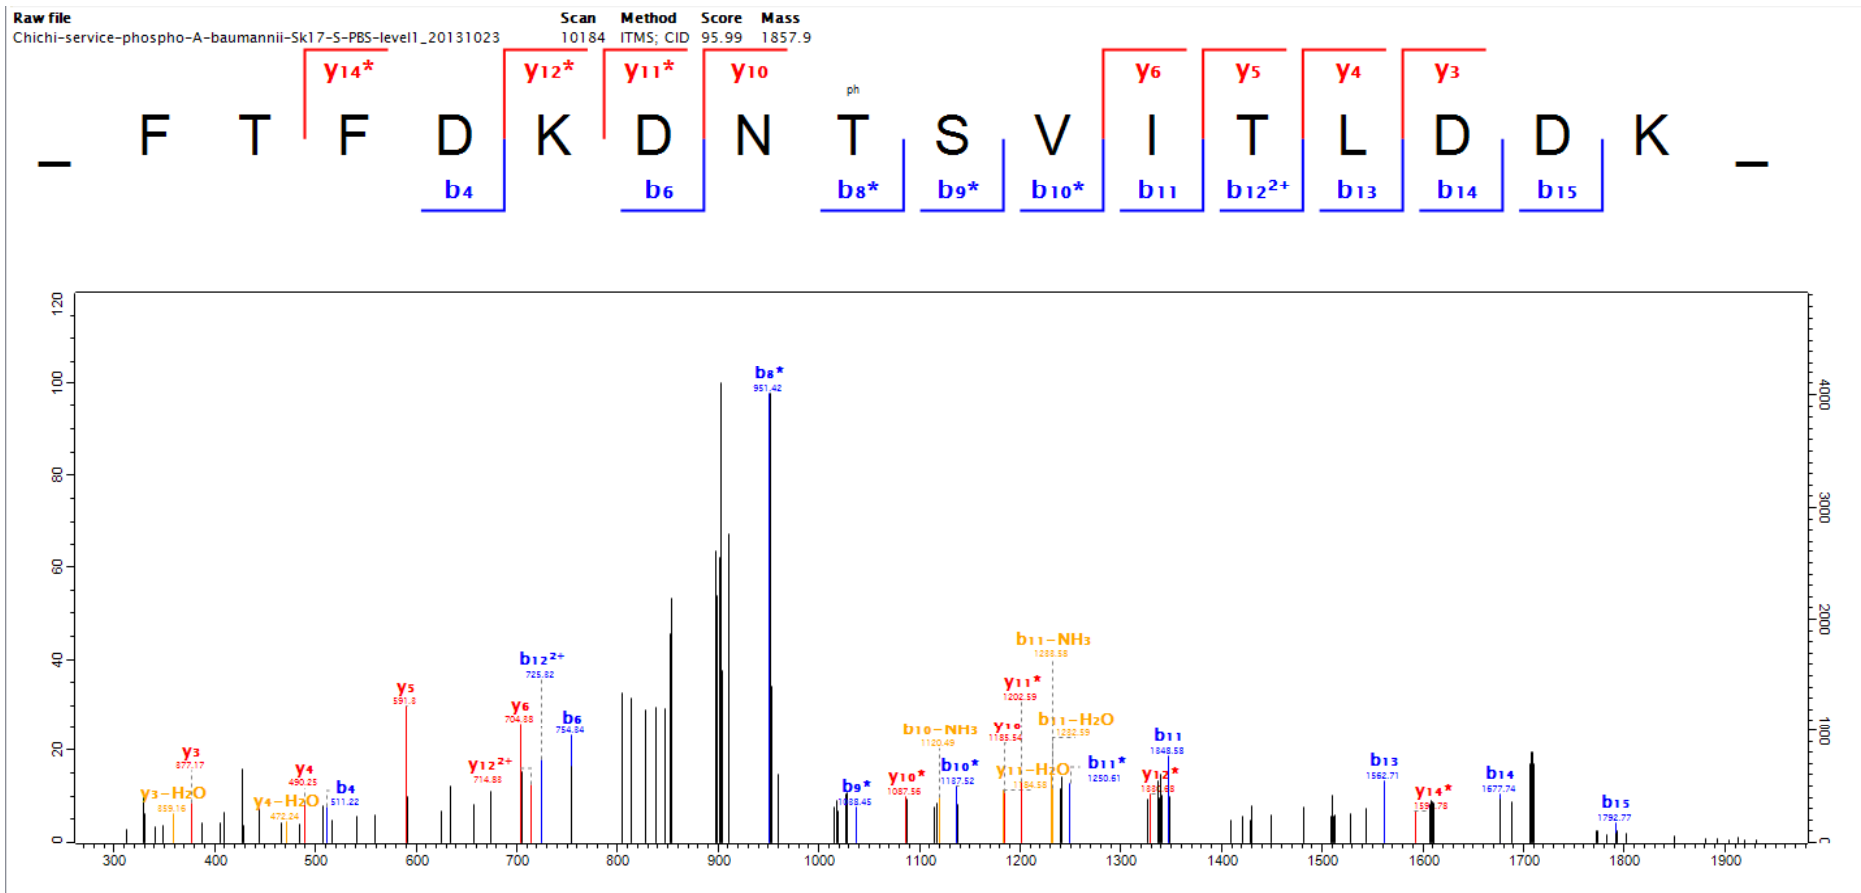

45-1

Raw file 2012060451P01 Scan 4637 Method ITMS; CID Score 85.22 Mass 2906.28

y<sub>24</sub><sup>2+</sup>
y<sub>23</sub><sup>2+</sup>
y<sub>22</sub><sup>2+</sup>
y<sub>21</sub><sup>2+</sup>
y<sub>20</sub><sup>2+</sup>
y<sub>18</sub><sup>2+</sup>
y<sub>17</sub><sup>2+</sup>
y<sub>14</sub><sup>2+</sup>
y<sub>13</sub>
y<sub>8</sub>
y<sub>6</sub>
y<sub>5</sub>
y<sub>4</sub>
y<sub>3</sub>
  
 - D G S S V D P A D D G T R H I R P E D G D P I E I D E -
   
b<sub>4</sub>
b<sub>5</sub>
b<sub>6</sub>
b<sub>15</sub><sup>2+</sup>
b<sub>16</sub><sup>2+</sup>
b<sub>19</sub><sup>2+</sup>
b<sub>20</sub><sup>2+</sup>
b<sub>21</sub><sup>2+</sup>
b<sub>23</sub><sup>2+</sup>
b<sub>24</sub><sup>2+</sup>
b<sub>25</sub><sup>2+</sup>
b<sub>26</sub><sup>2+</sup>

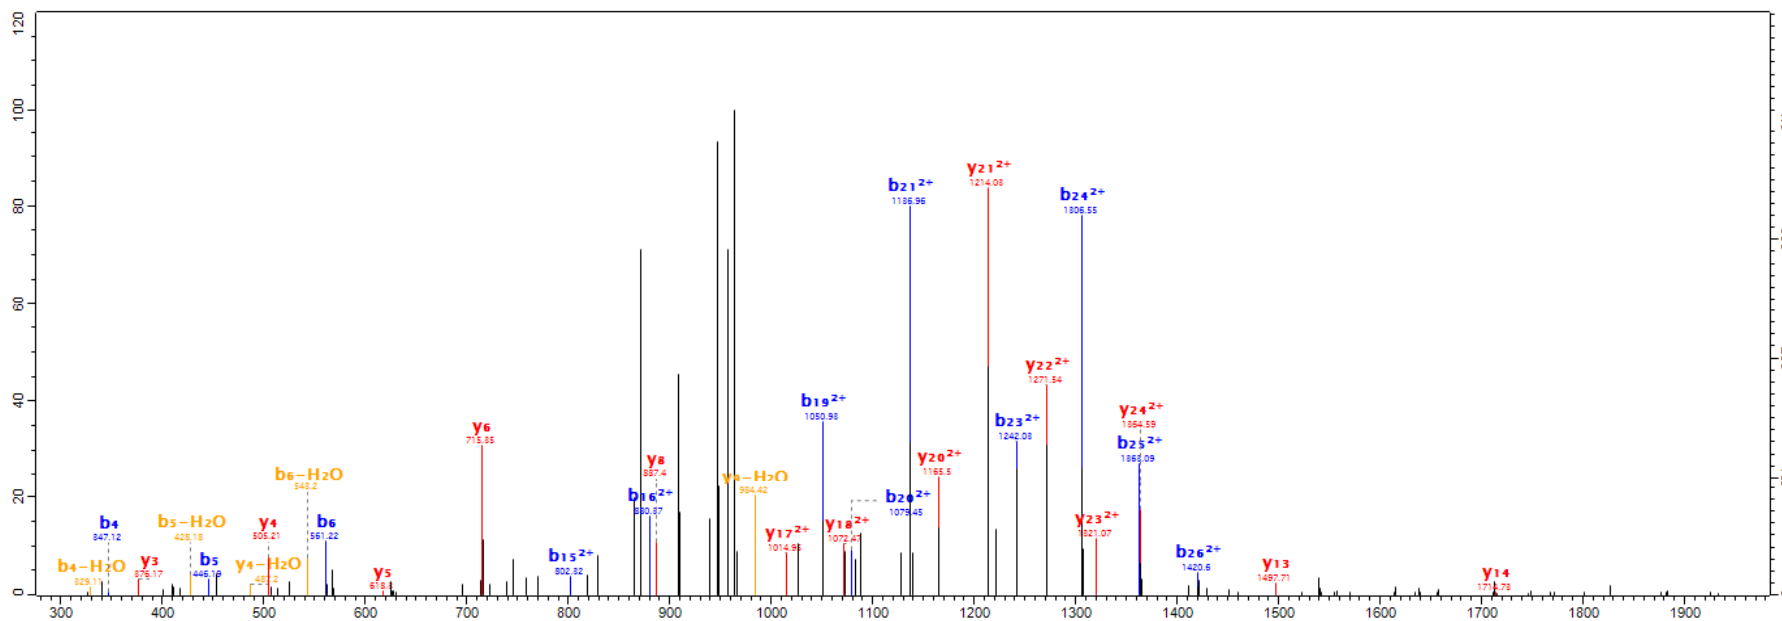

45-2

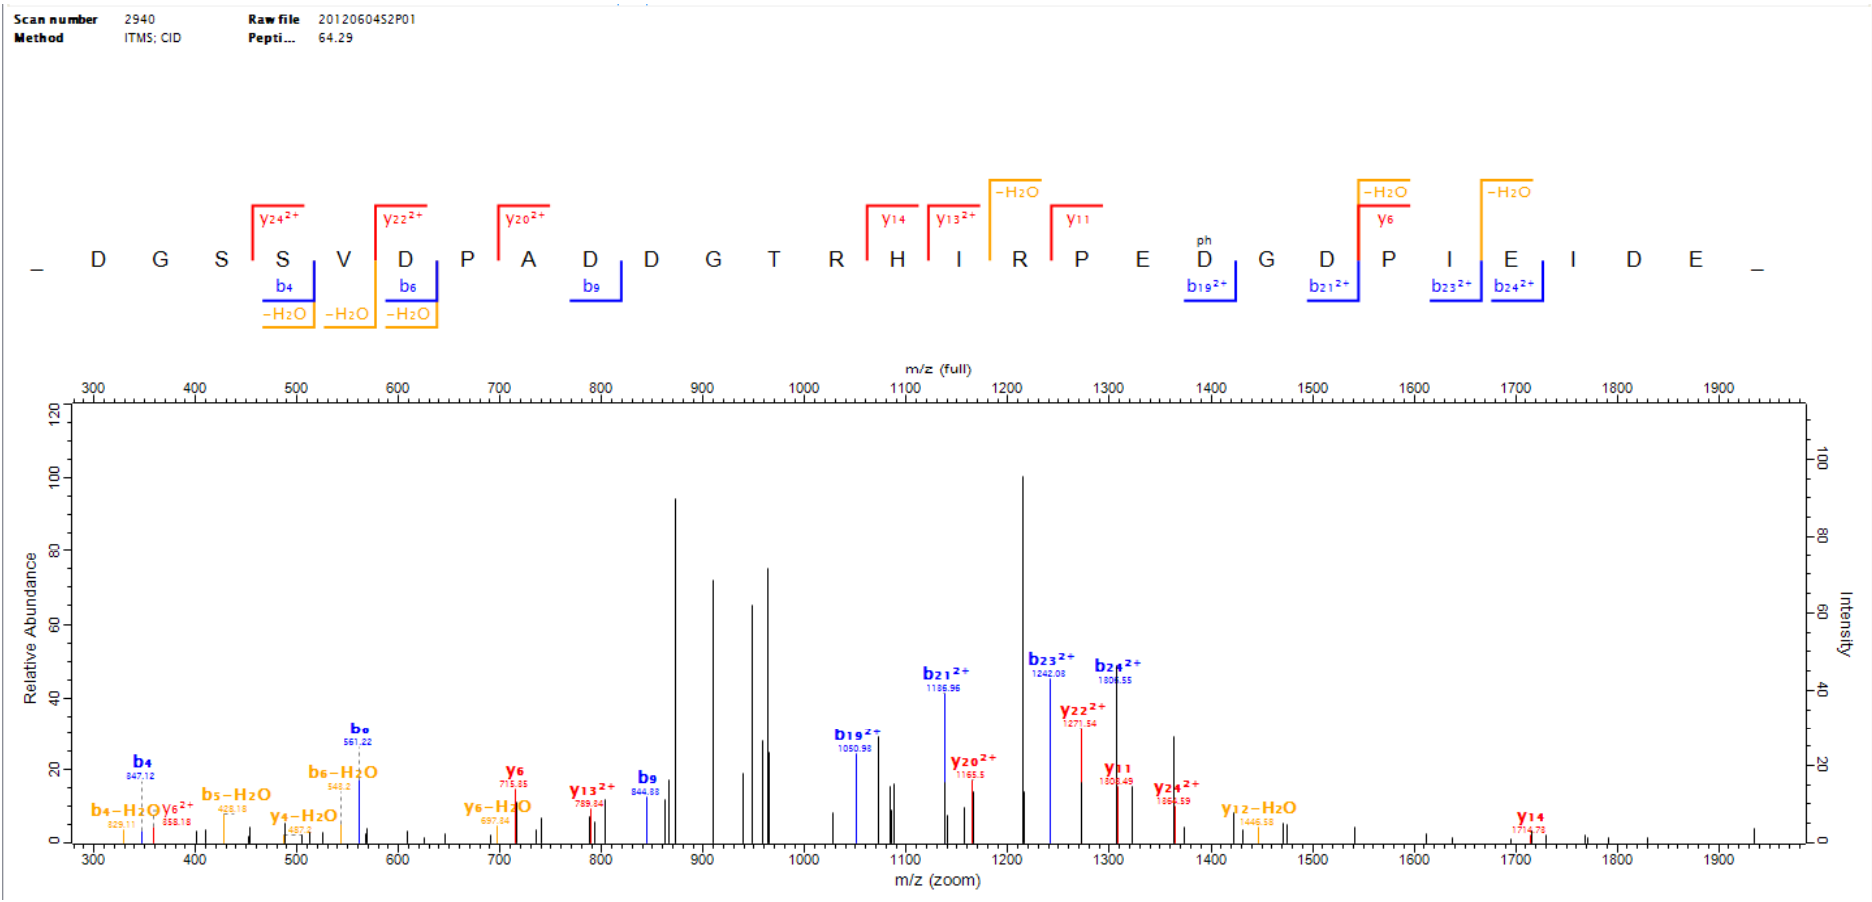



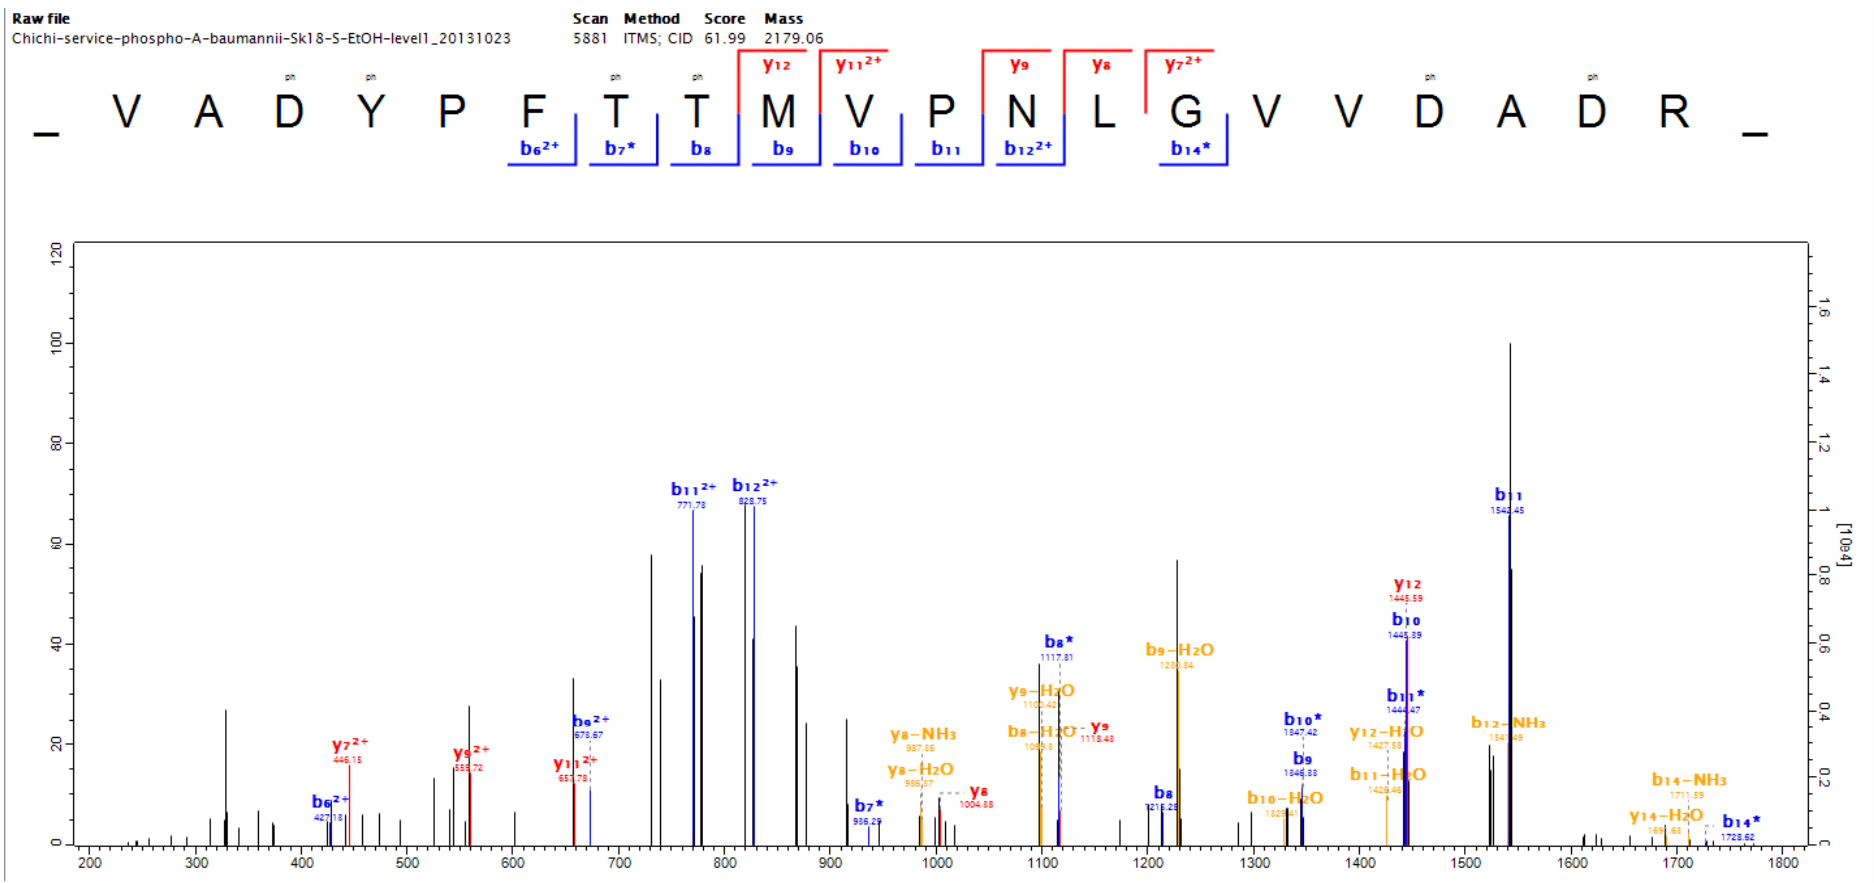

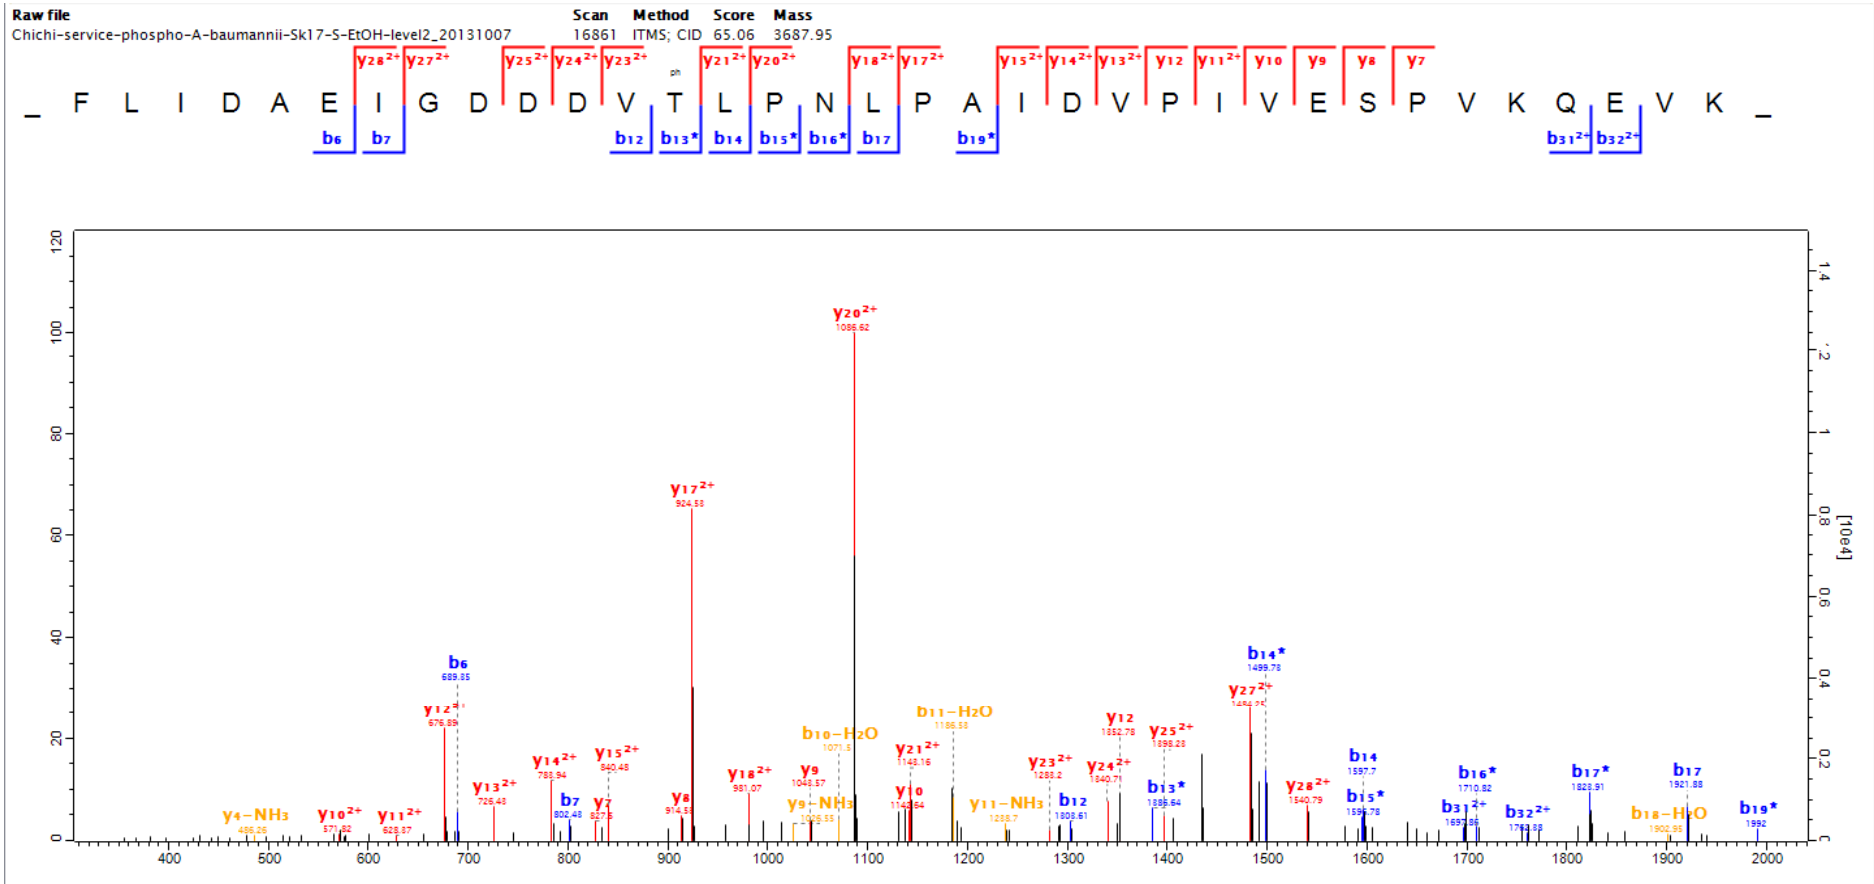

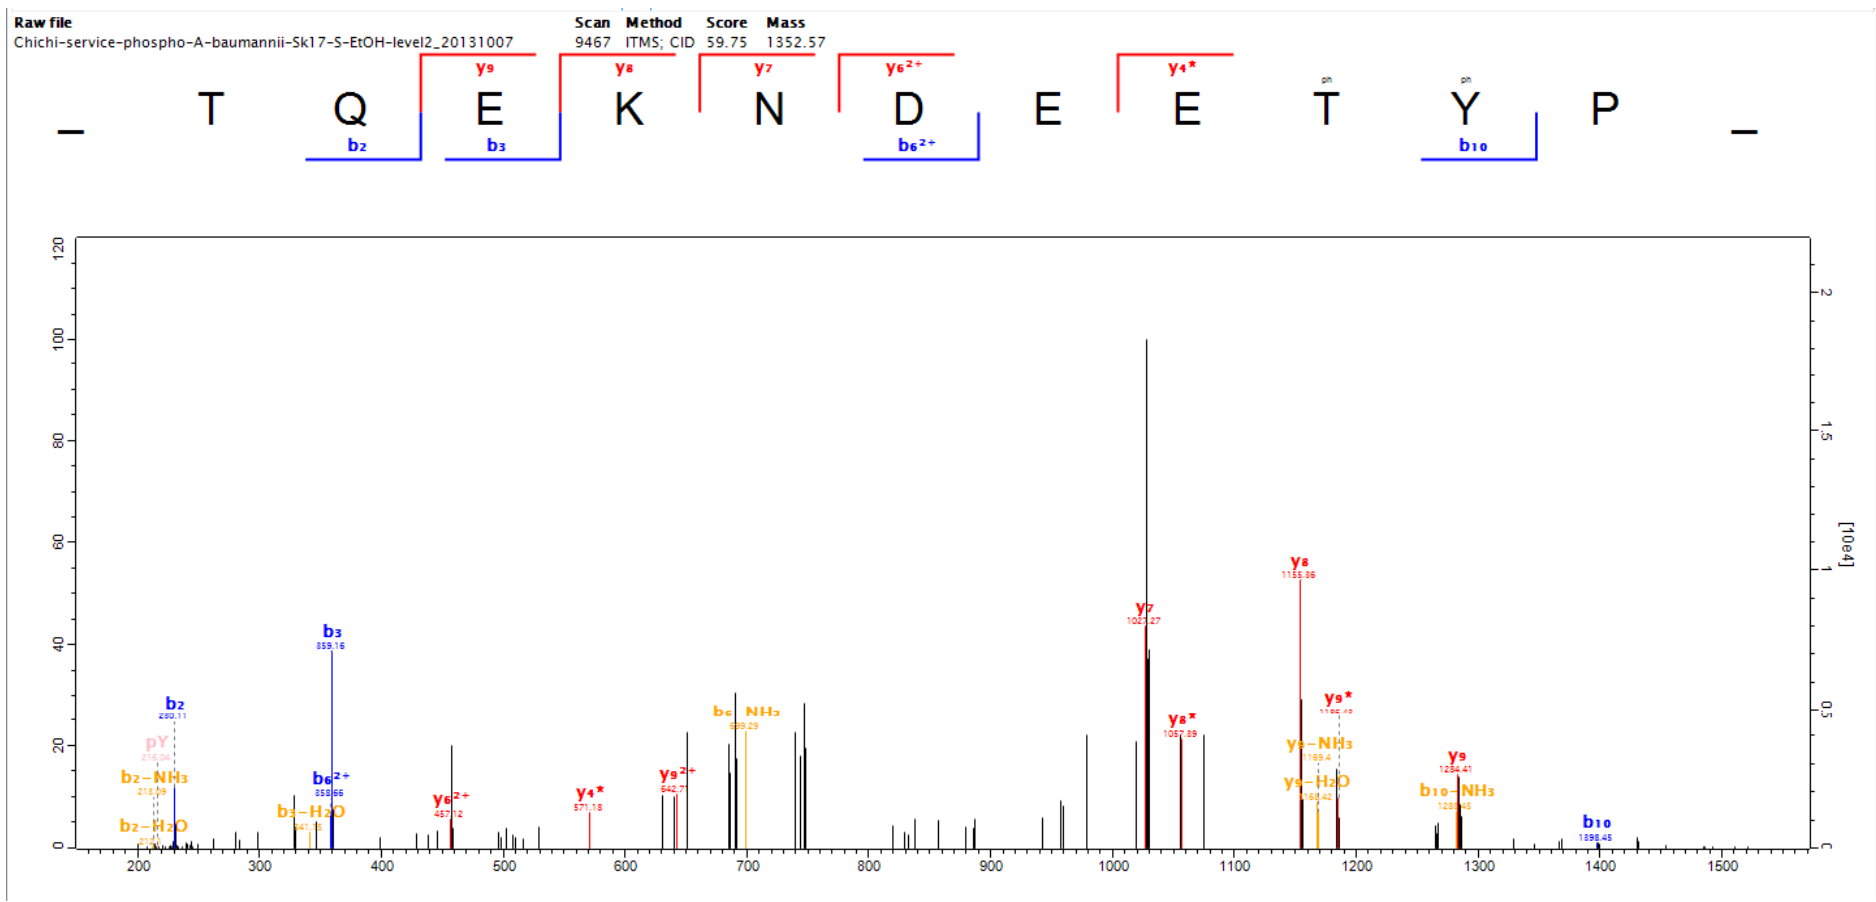

49-1

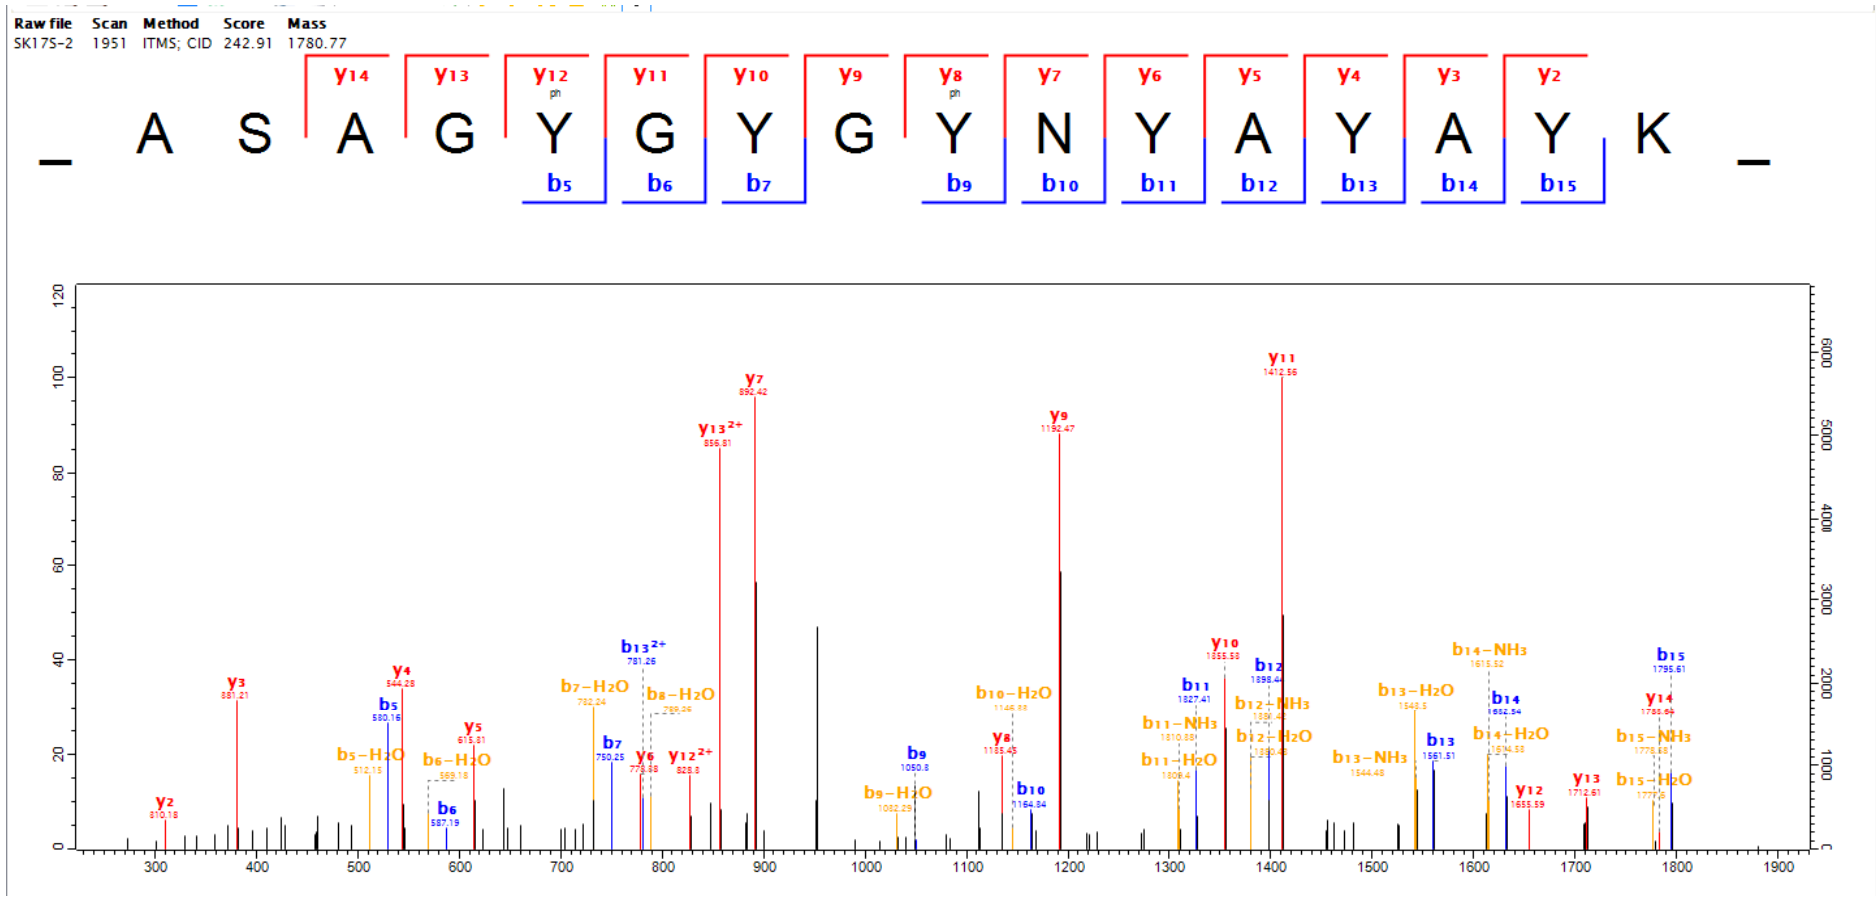

49-2

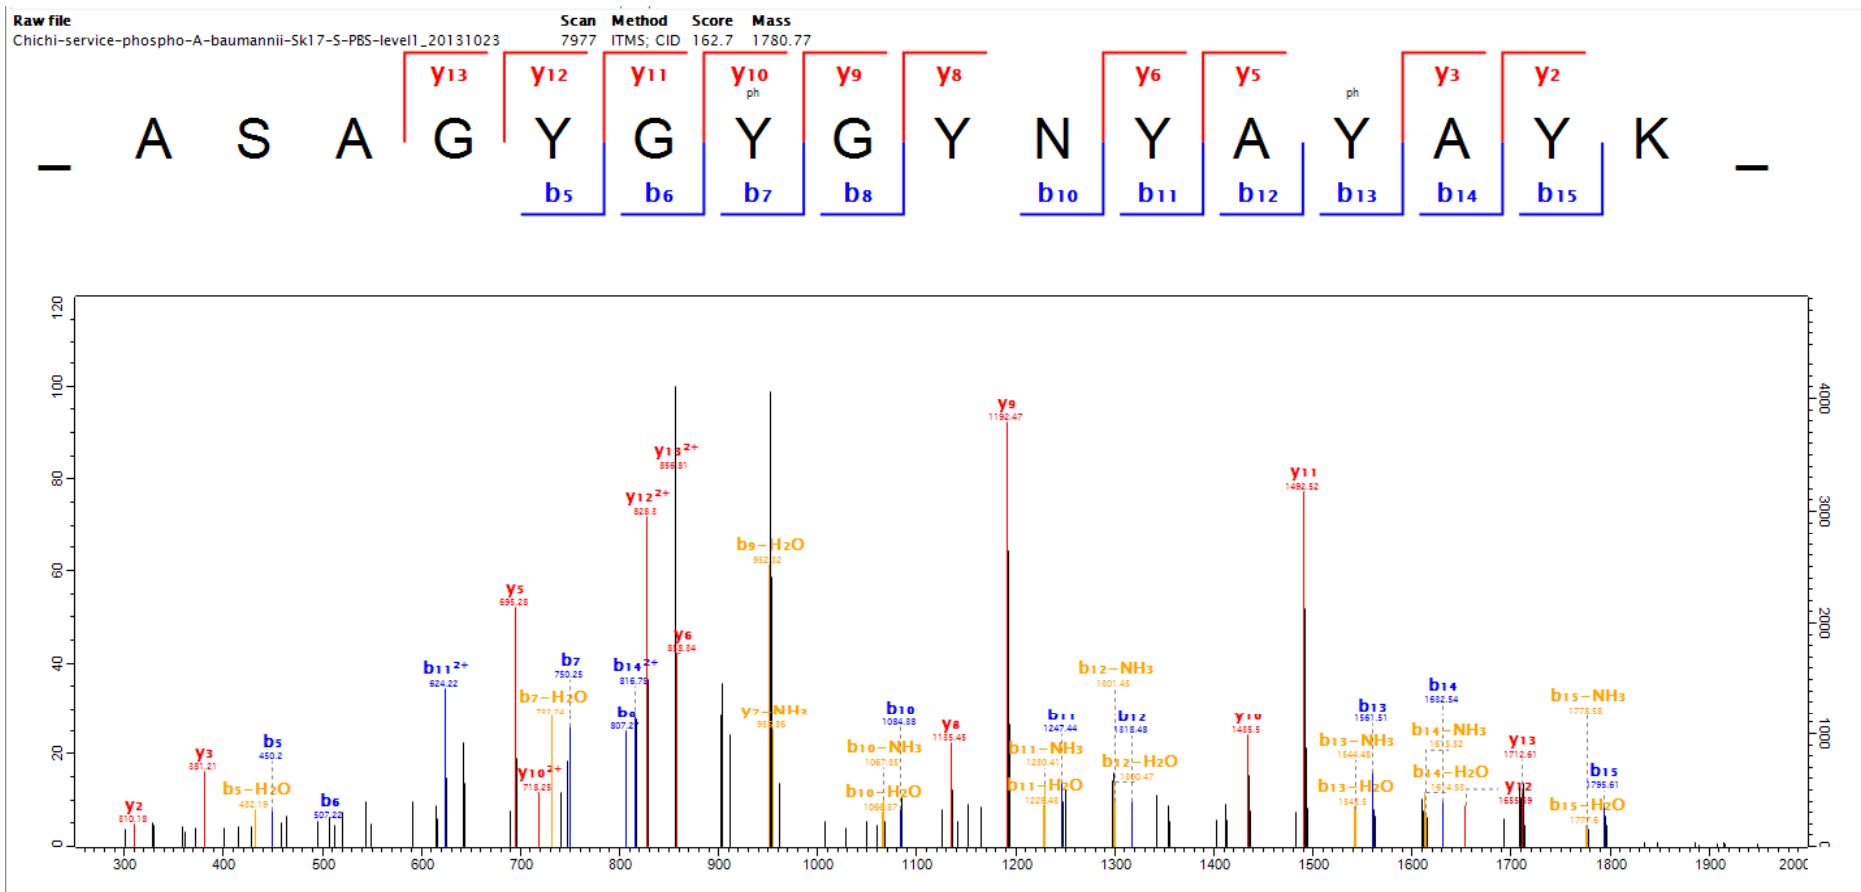

49-3

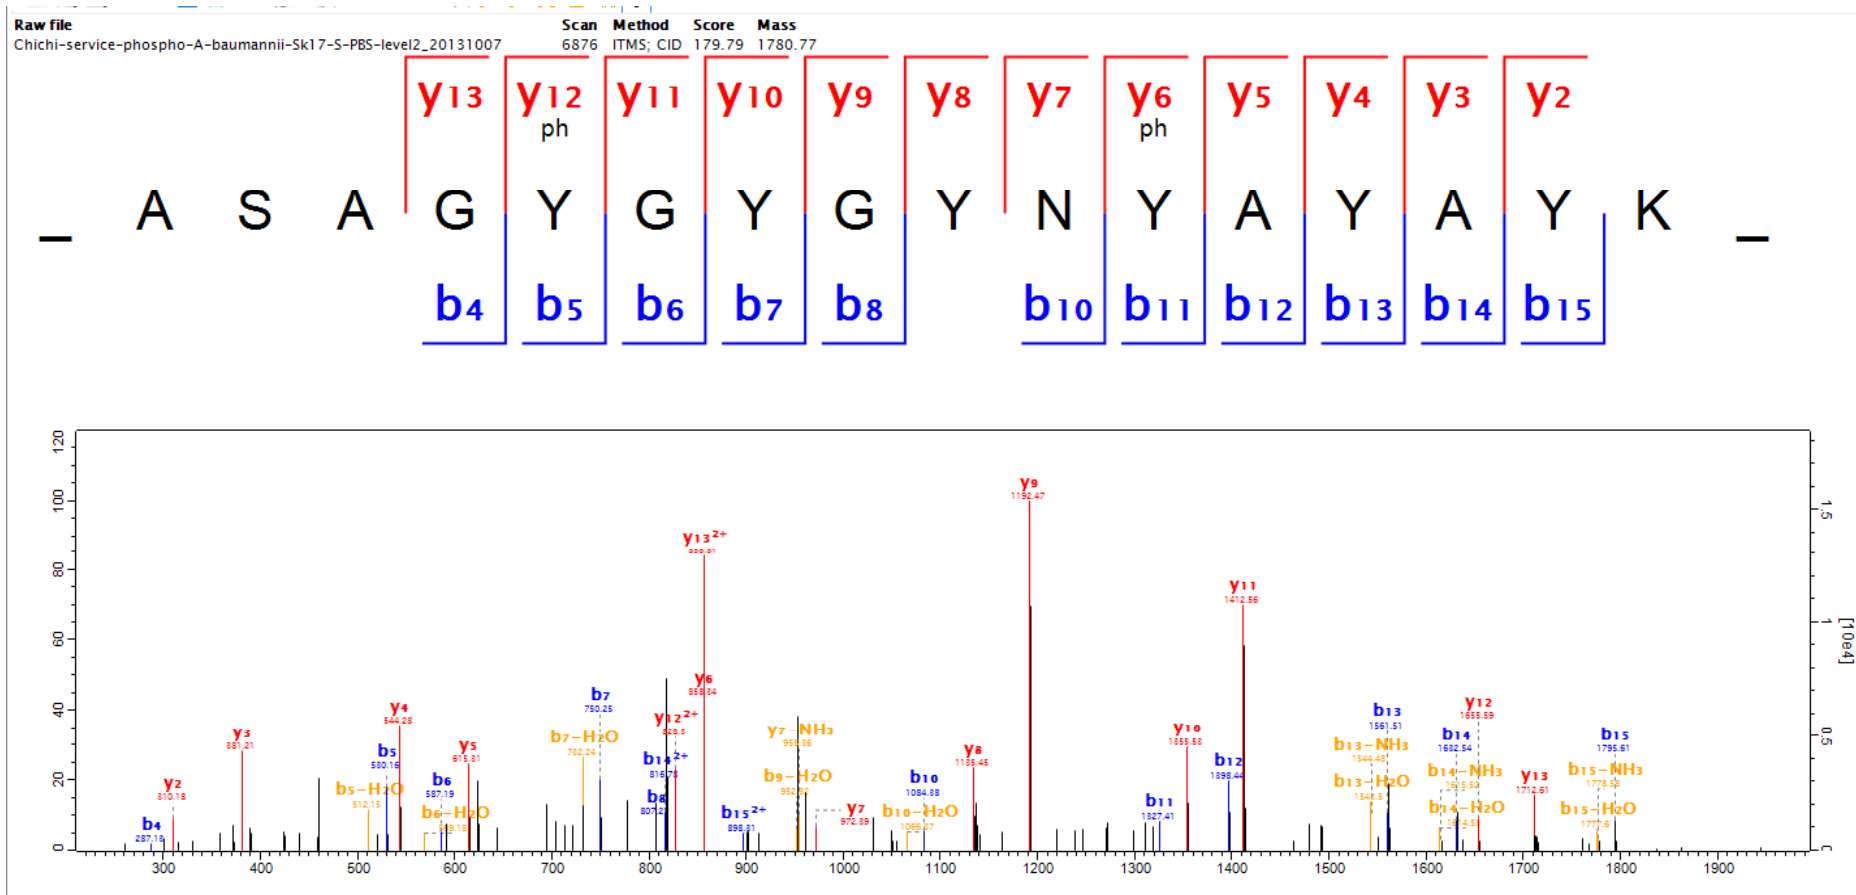

49-4

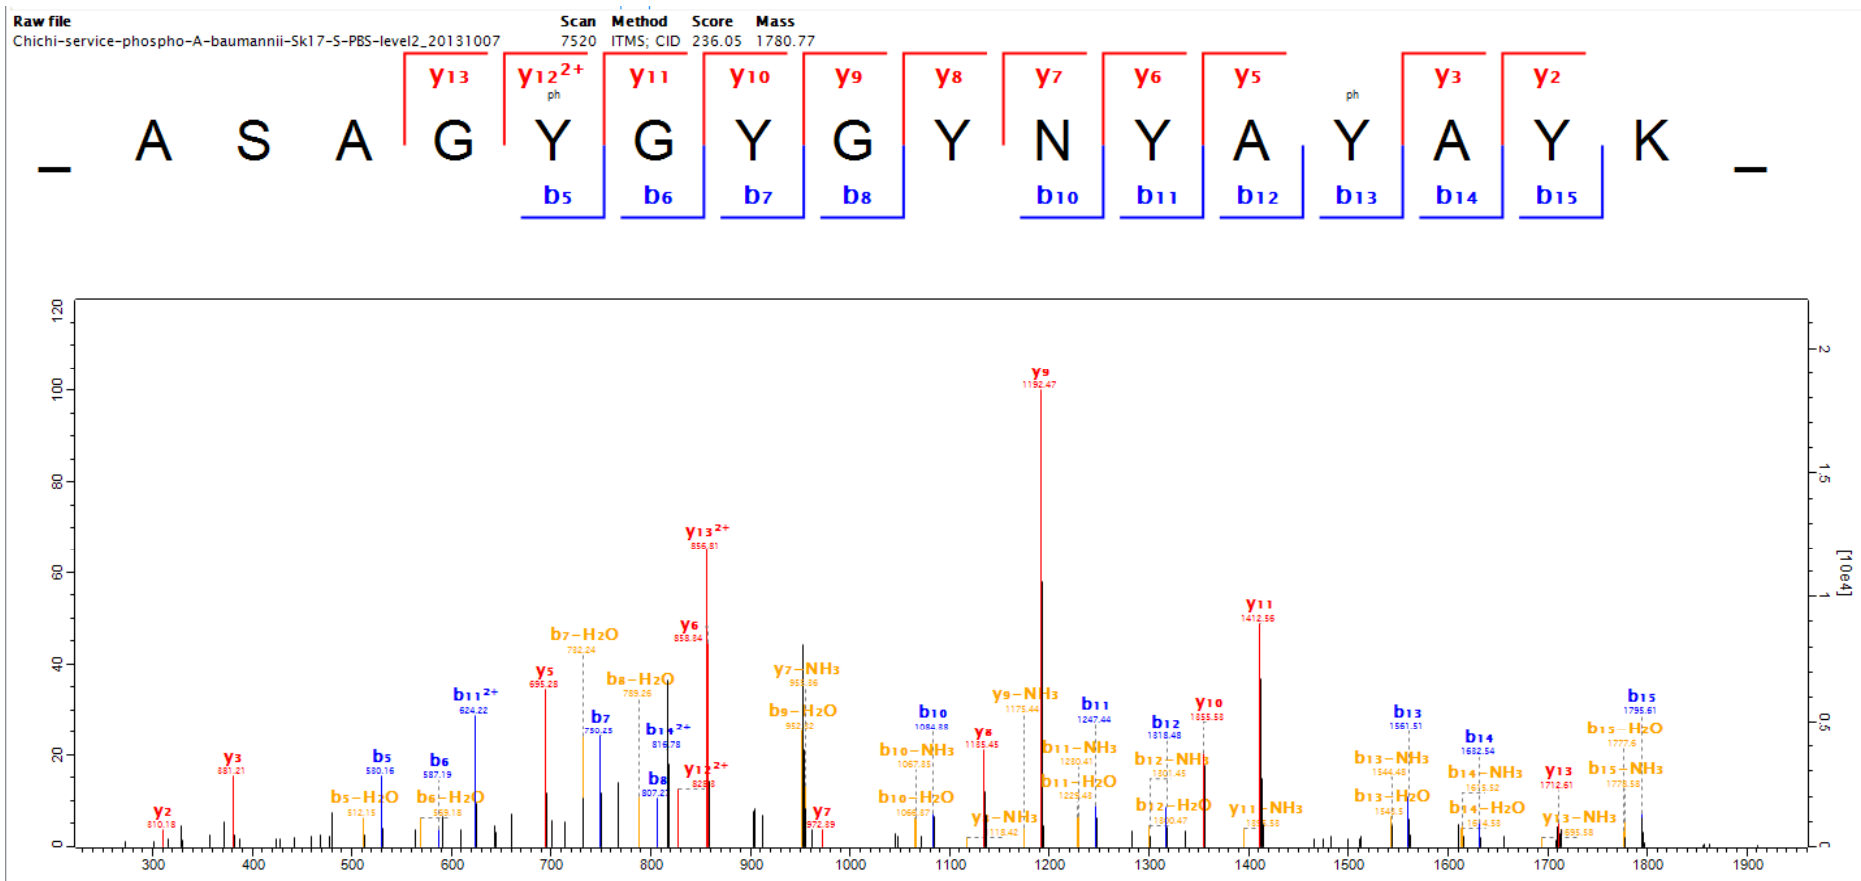

49-5

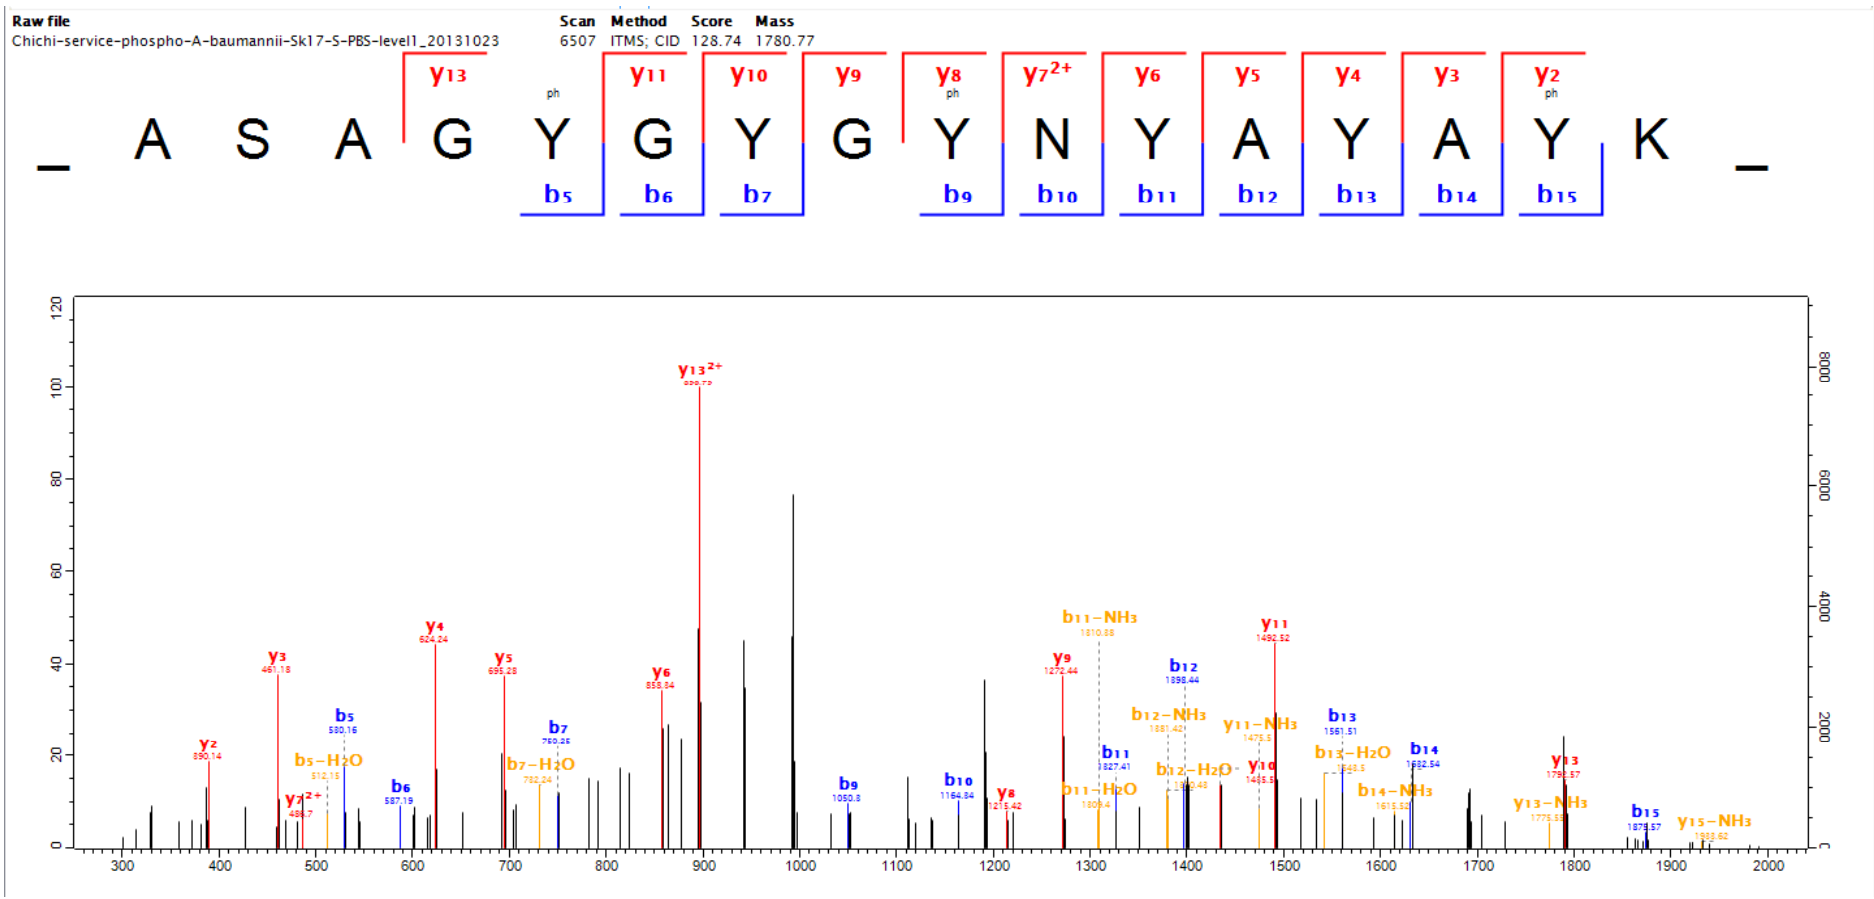



49-6

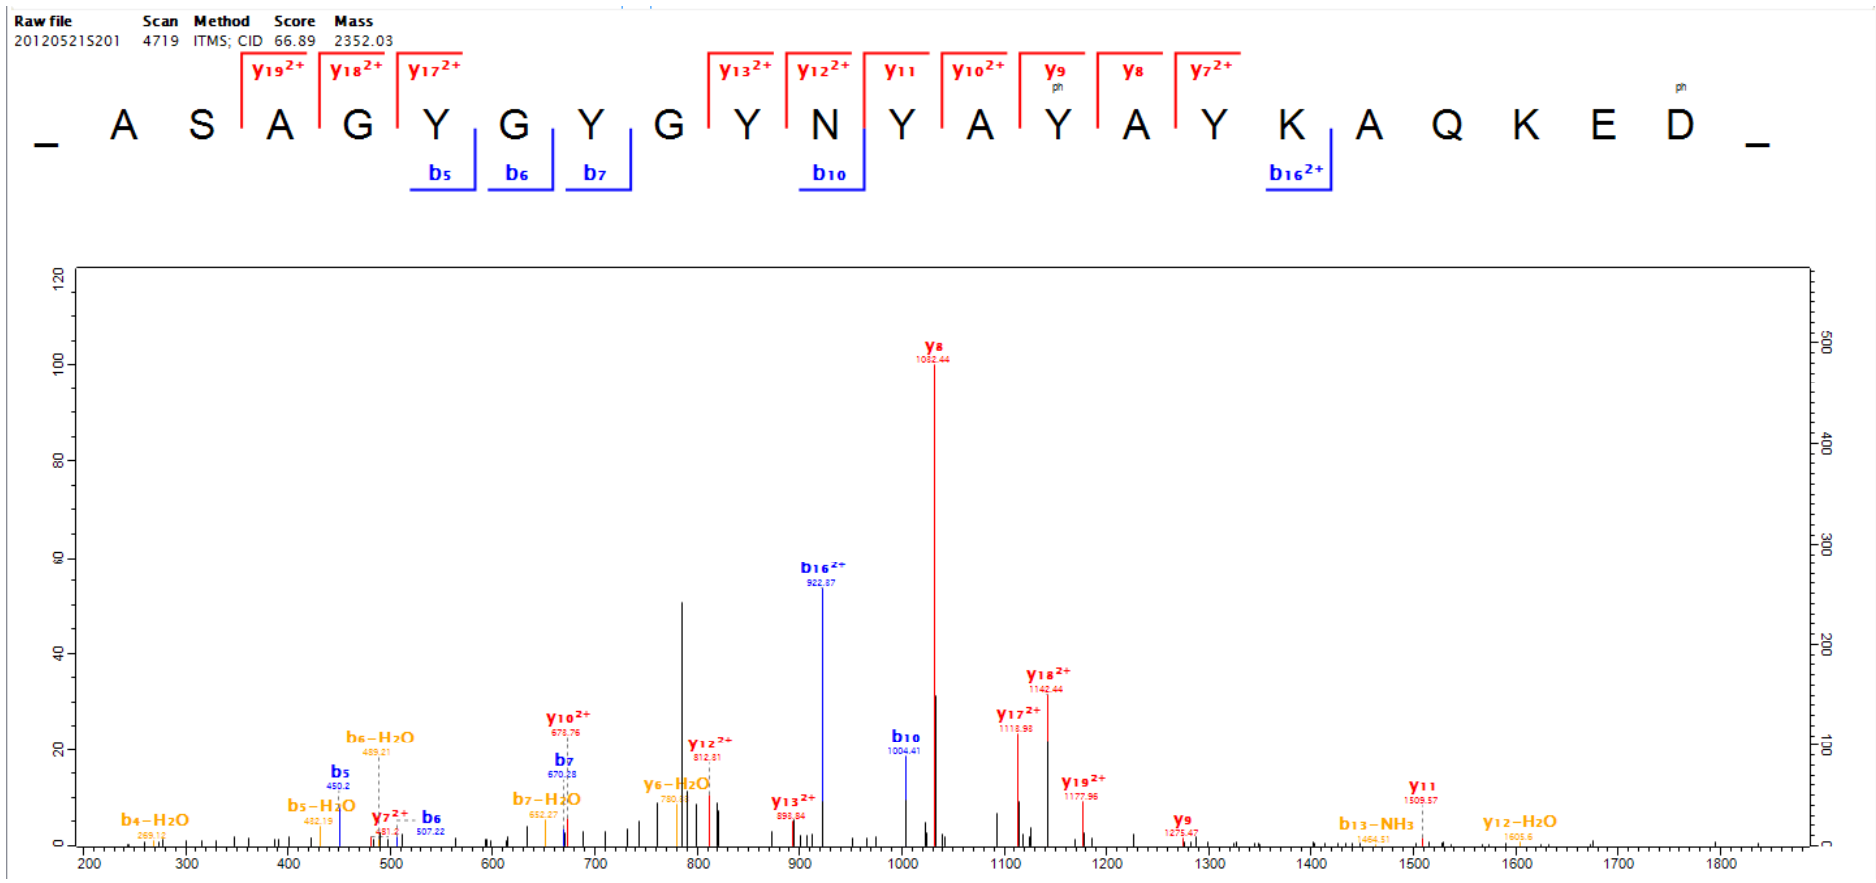

49-7

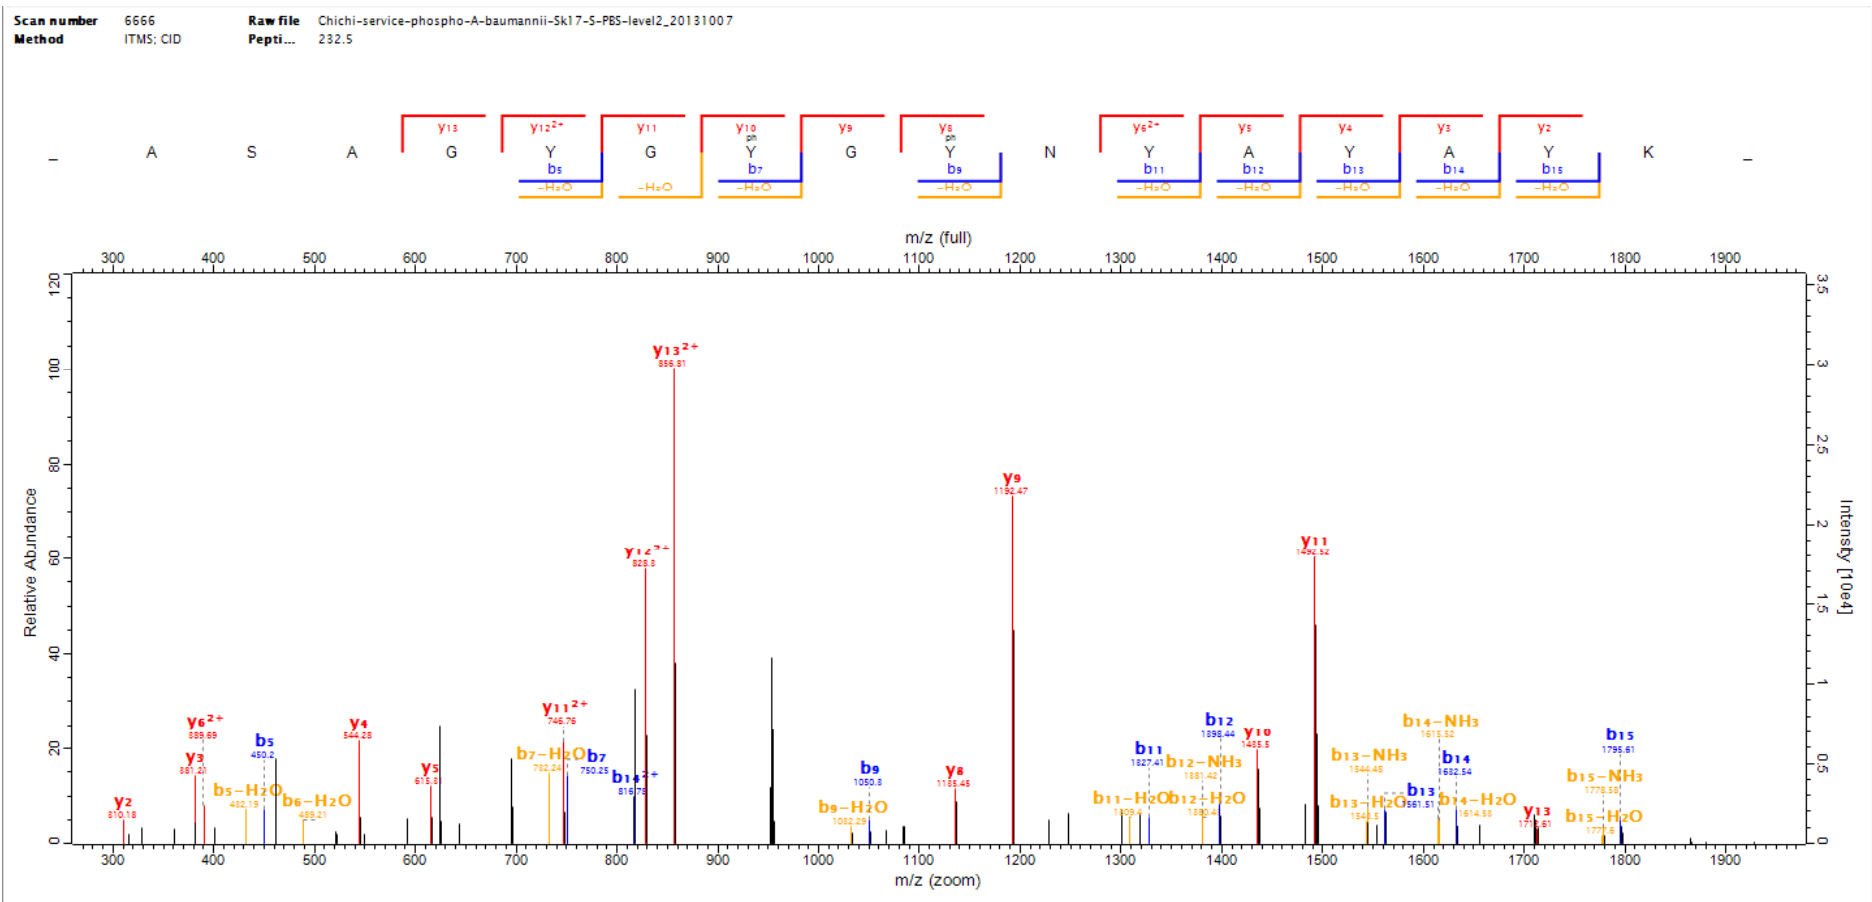

49-8

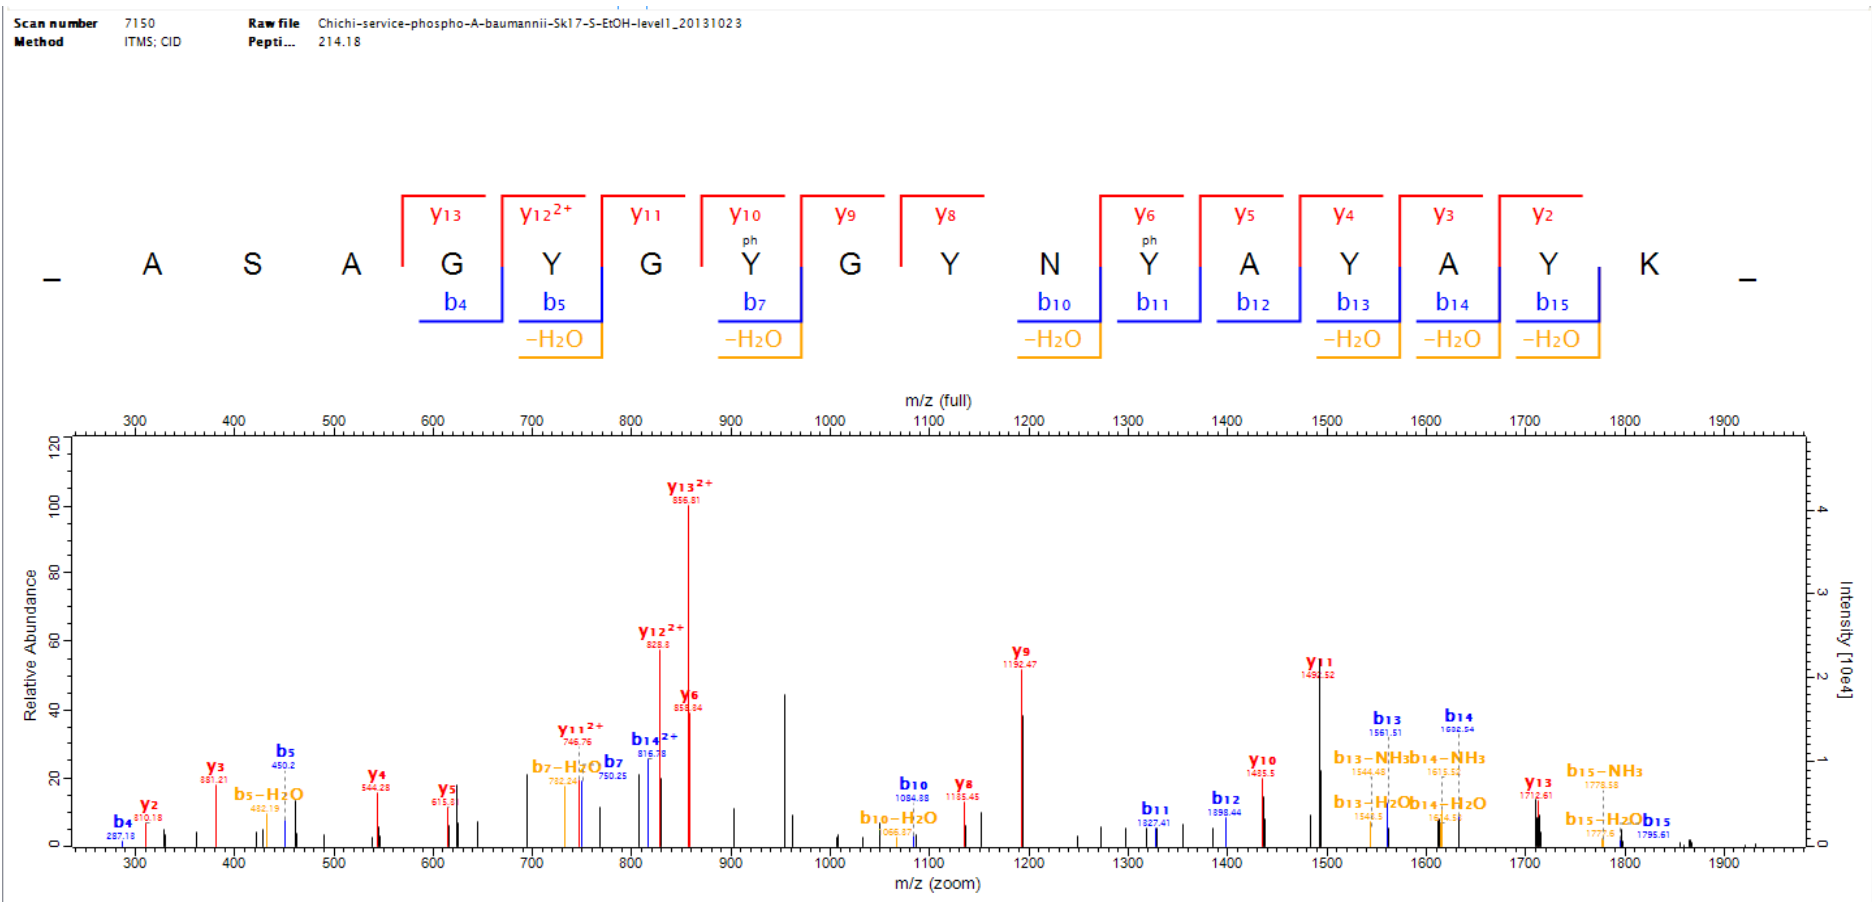

49-9

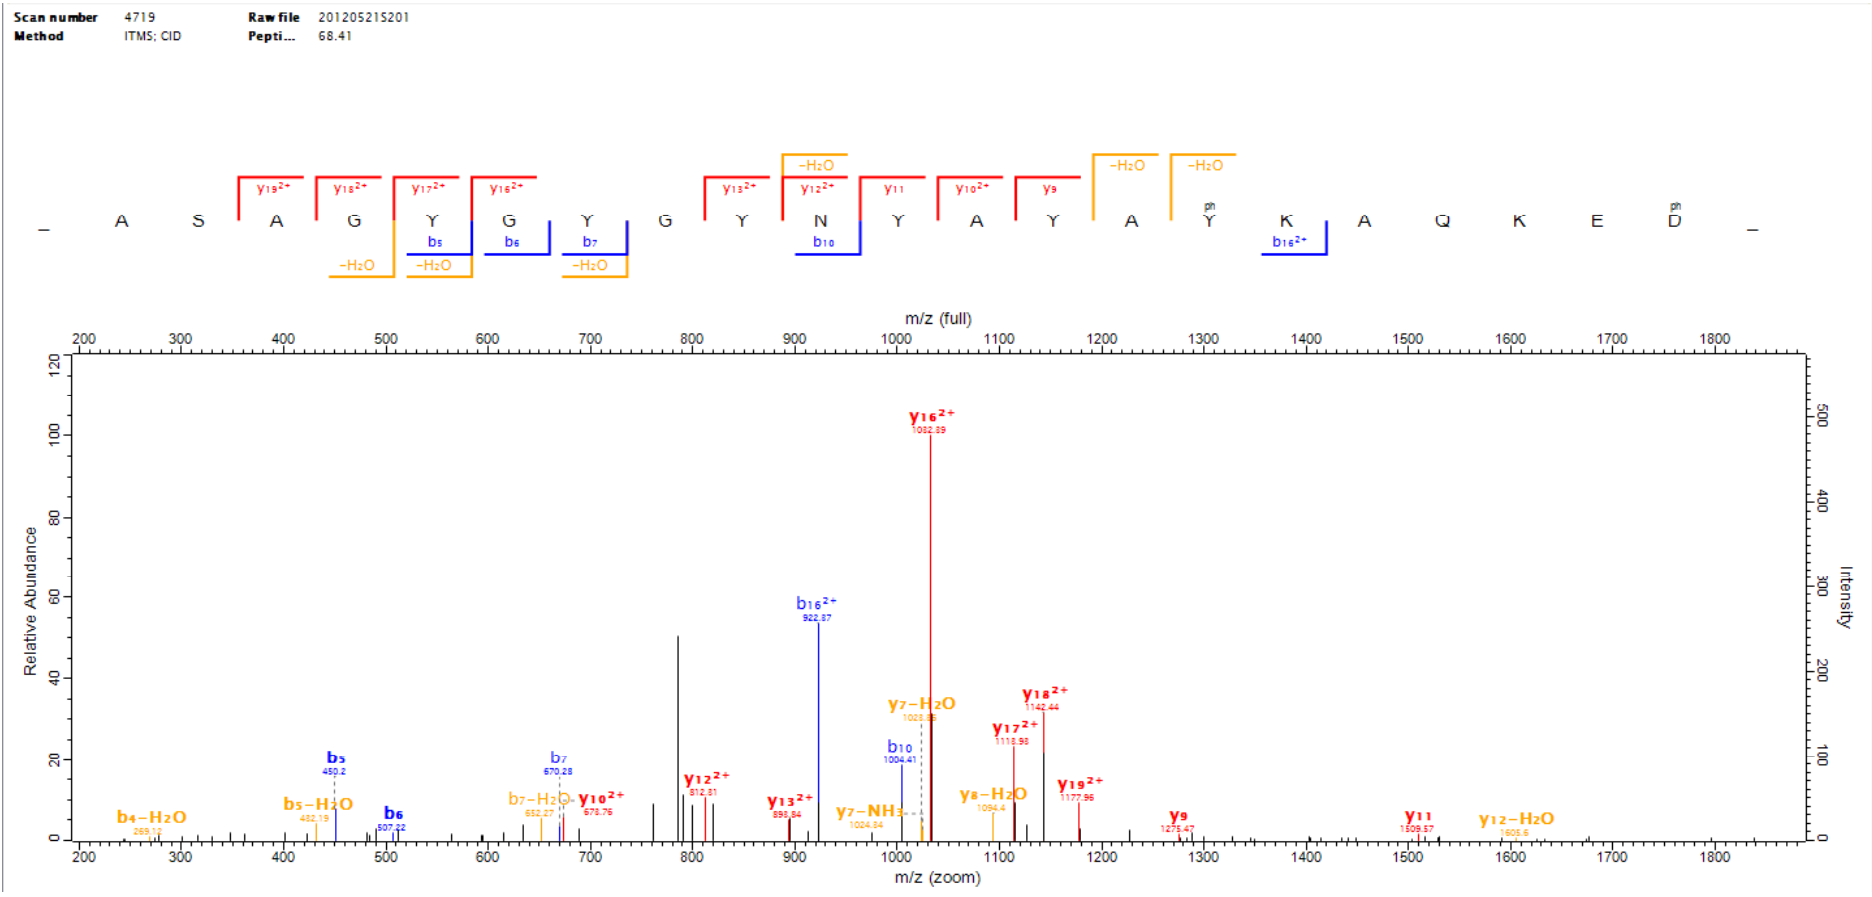

49-10

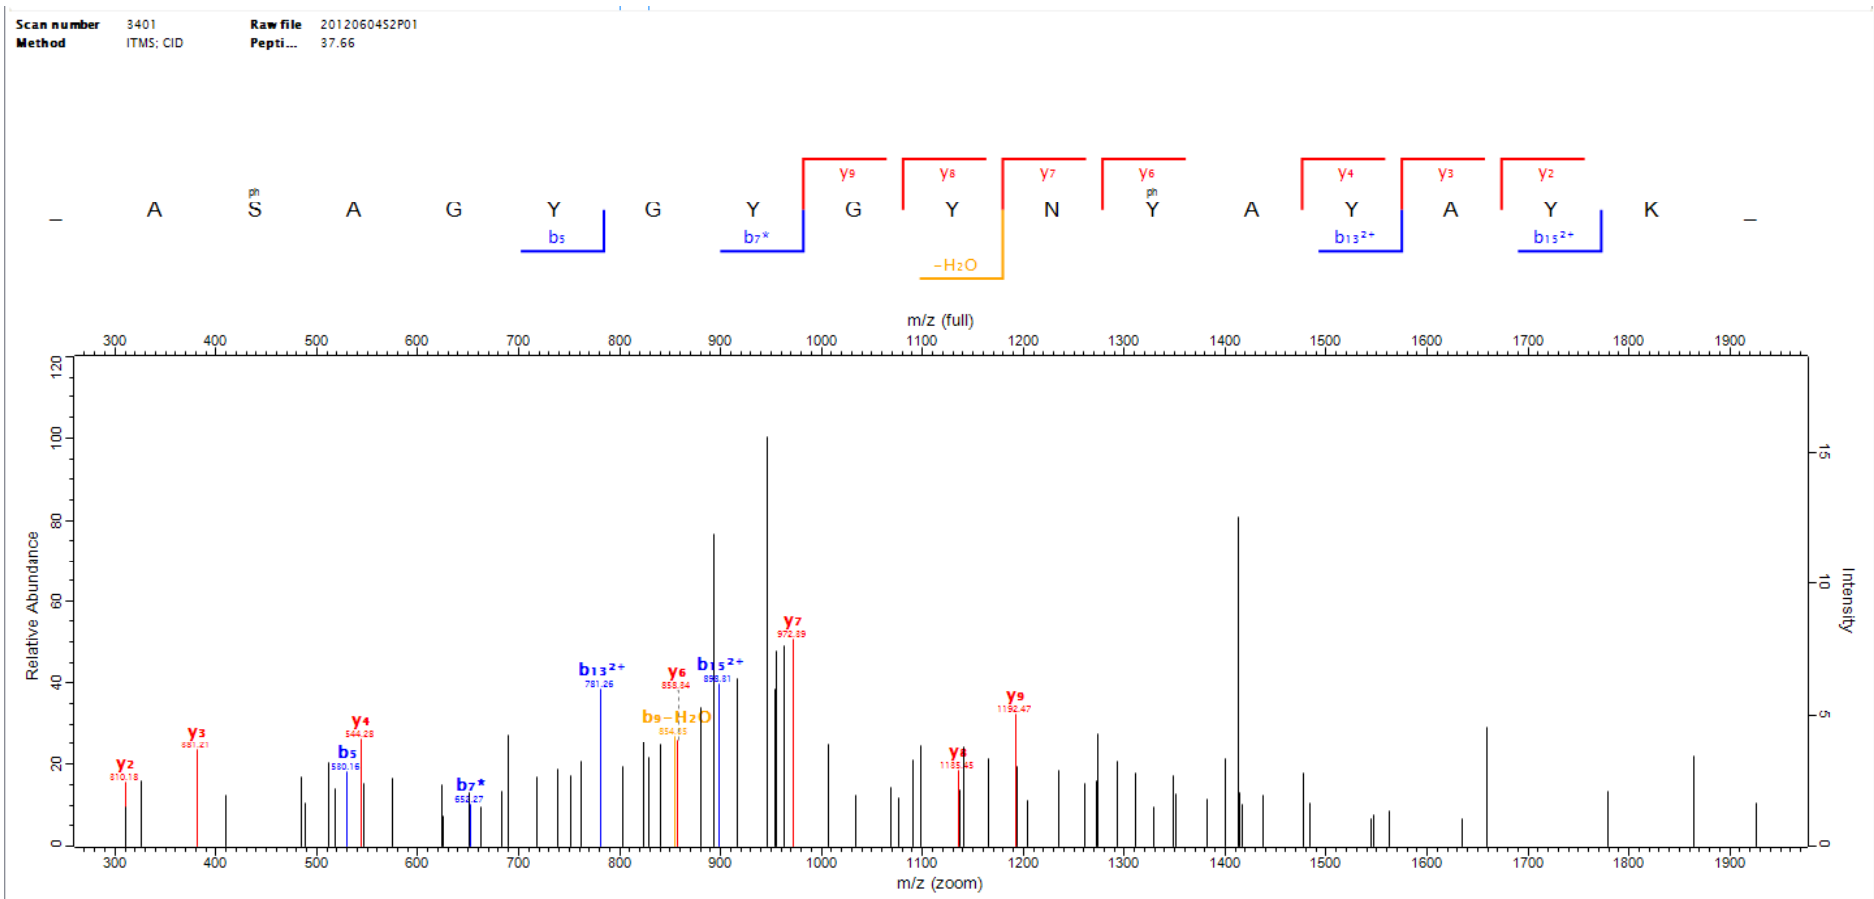

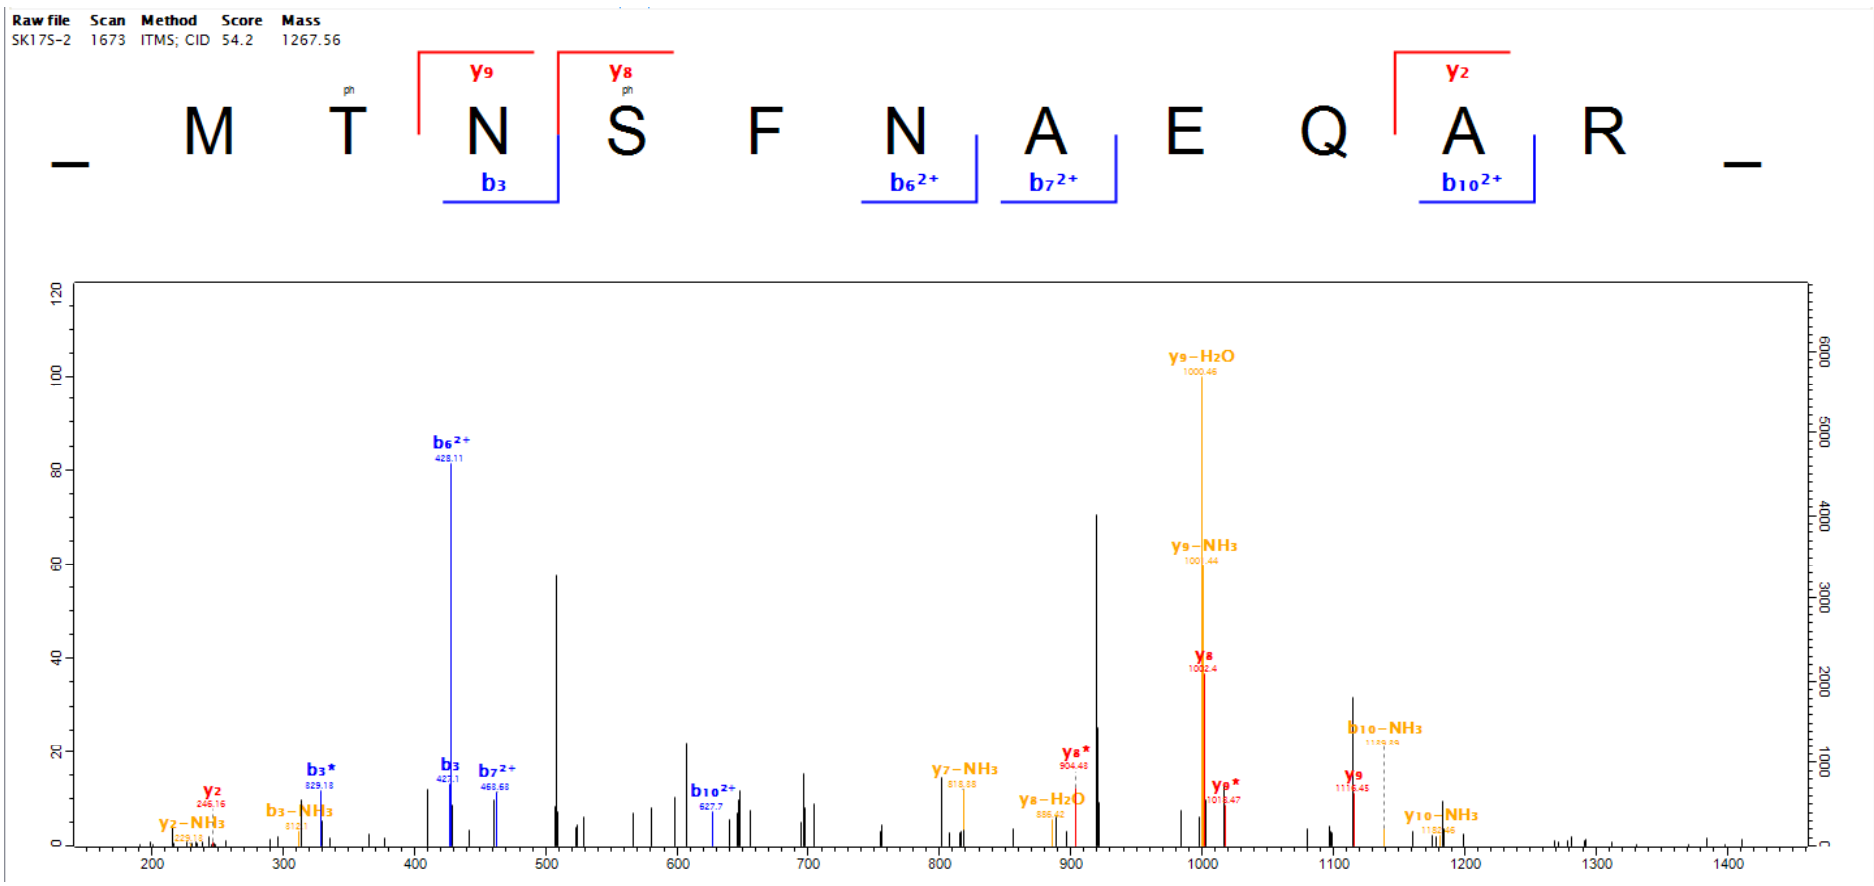

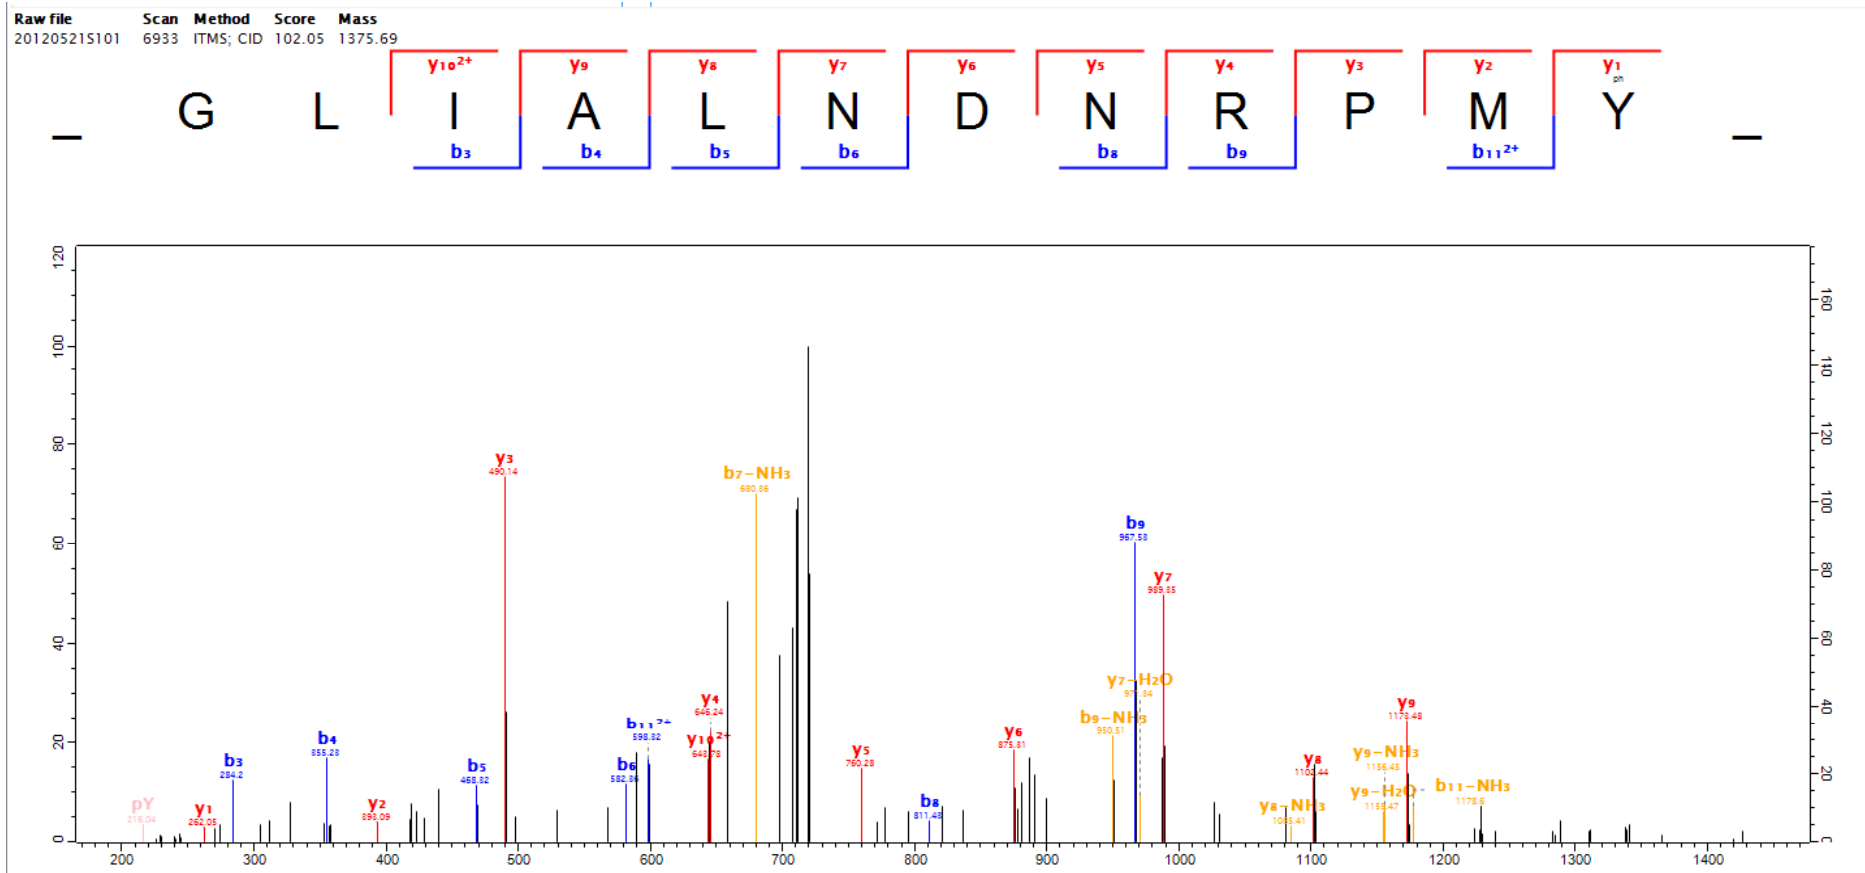

Raw file  
Chichi-service-phospho-A-baumannii-Sk17-S-PBS-level2\_20131007

Scan Method Score Mass  
12875 ITMS; CID 79.89 1508.77

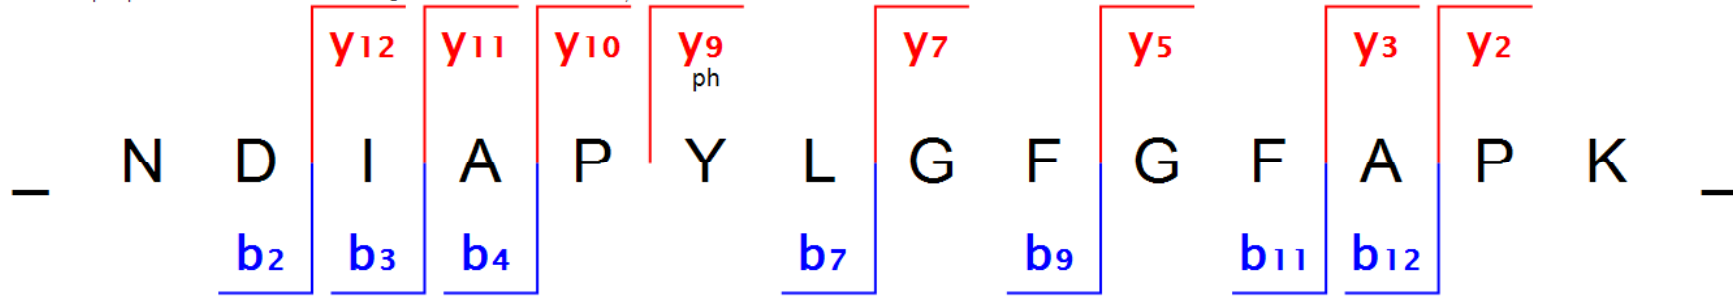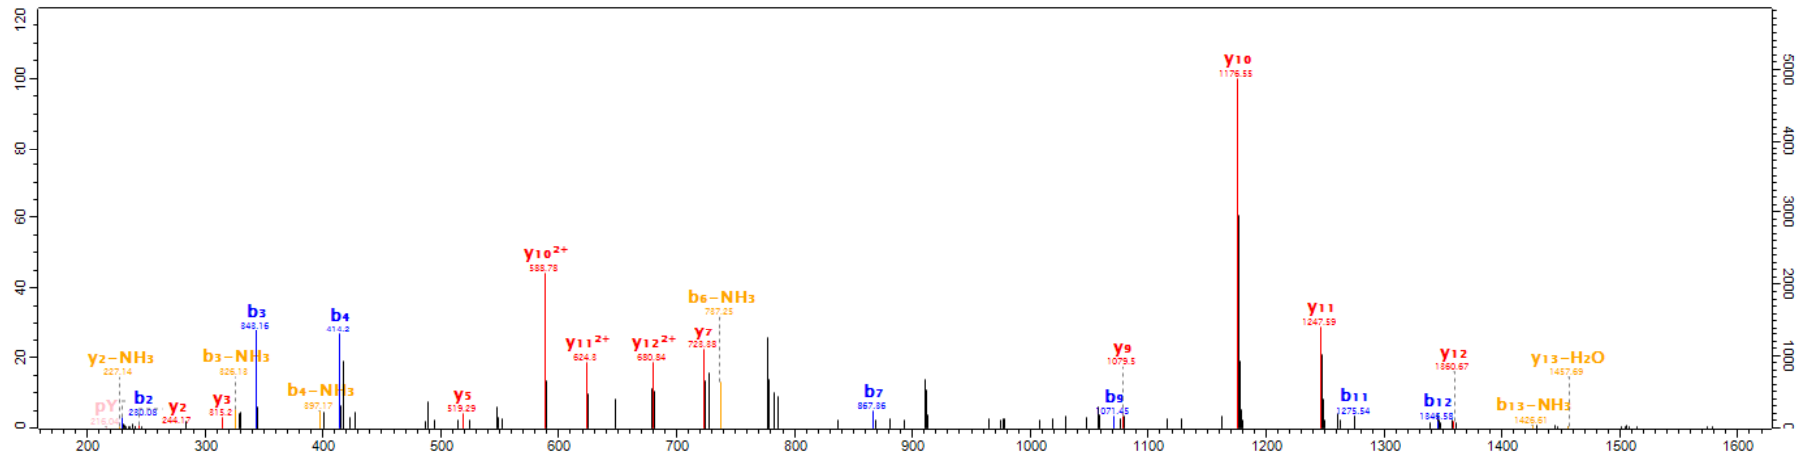



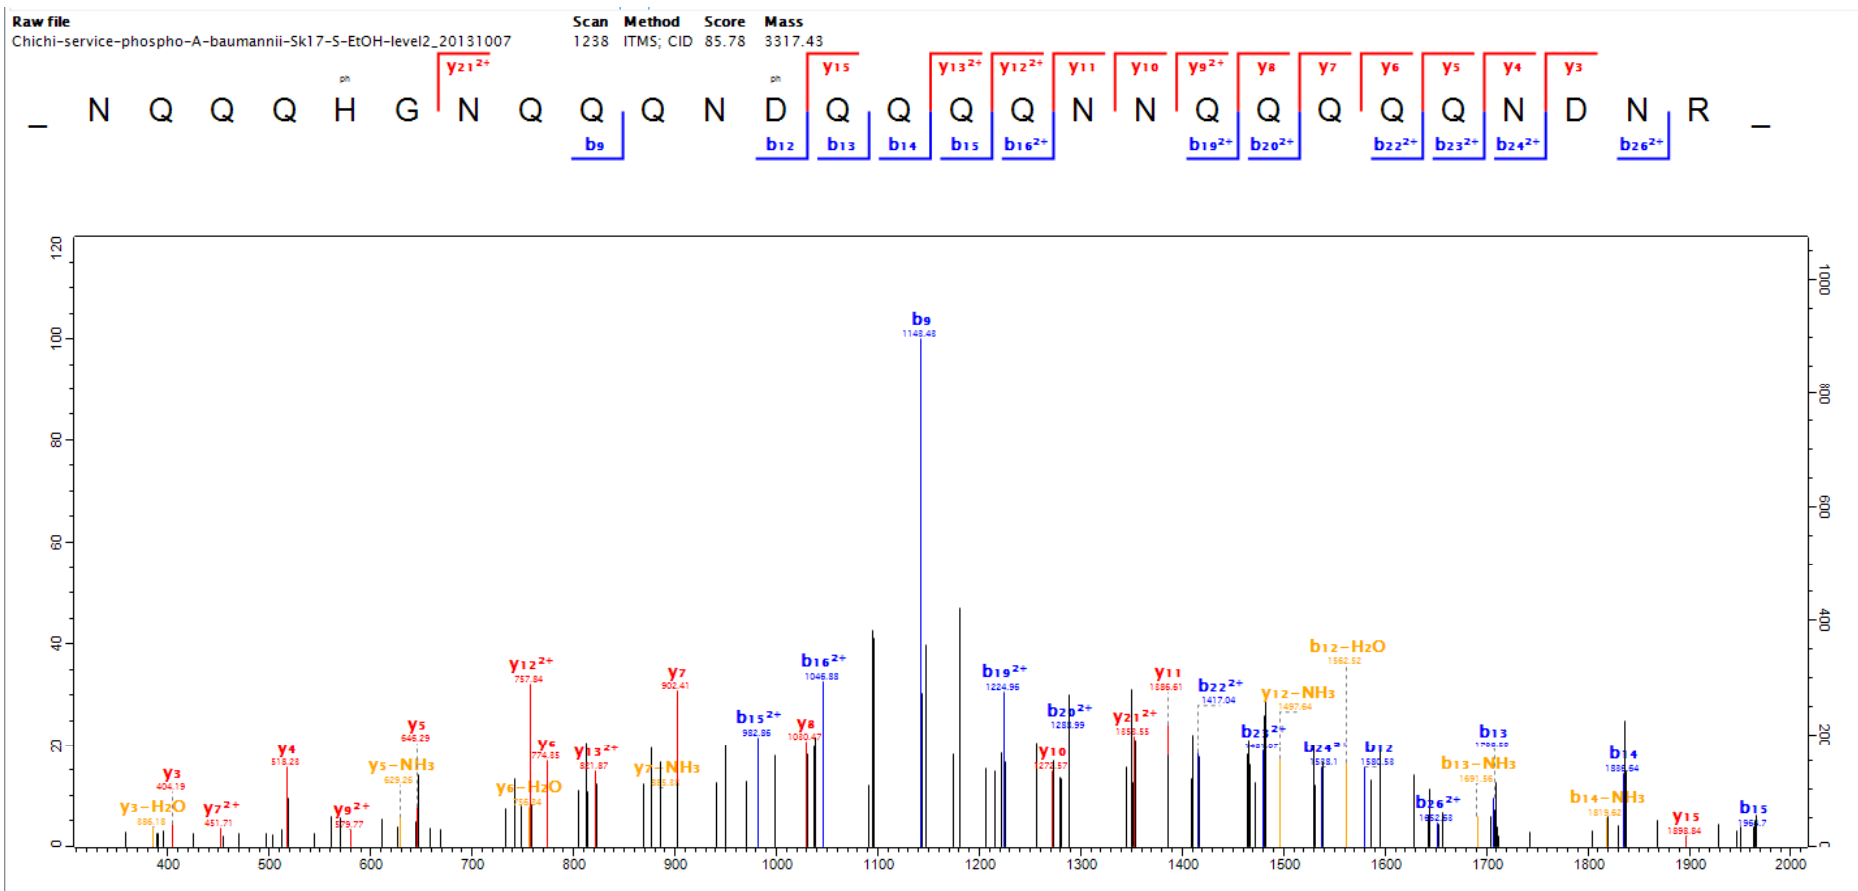

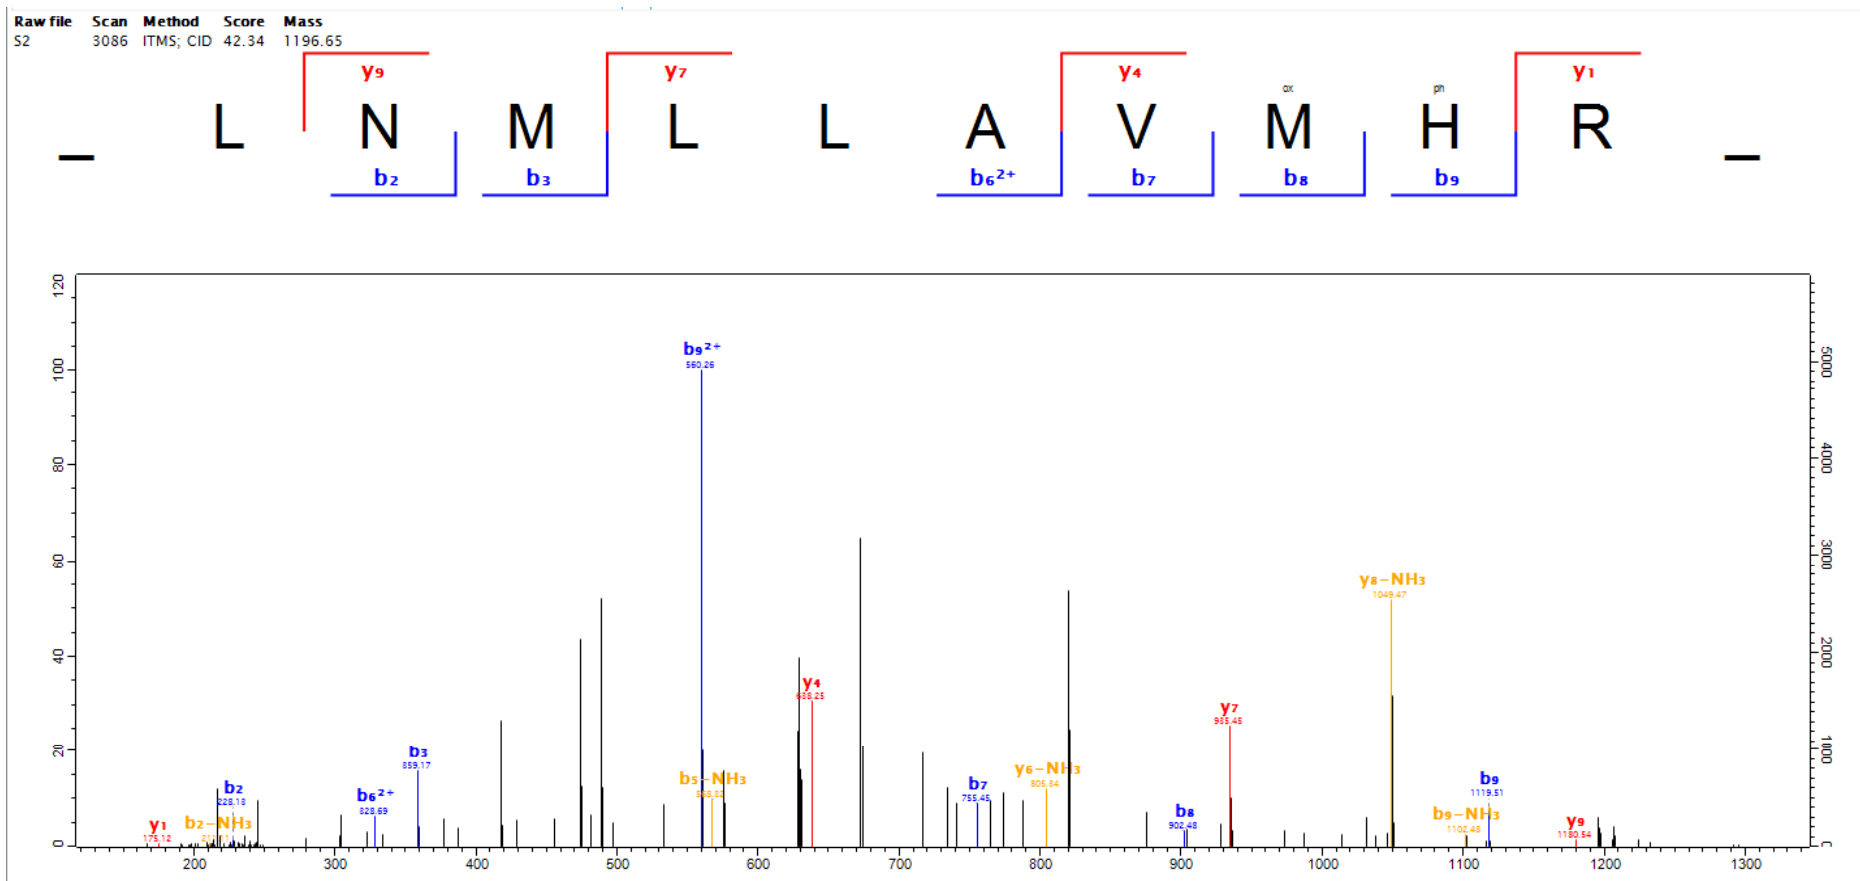

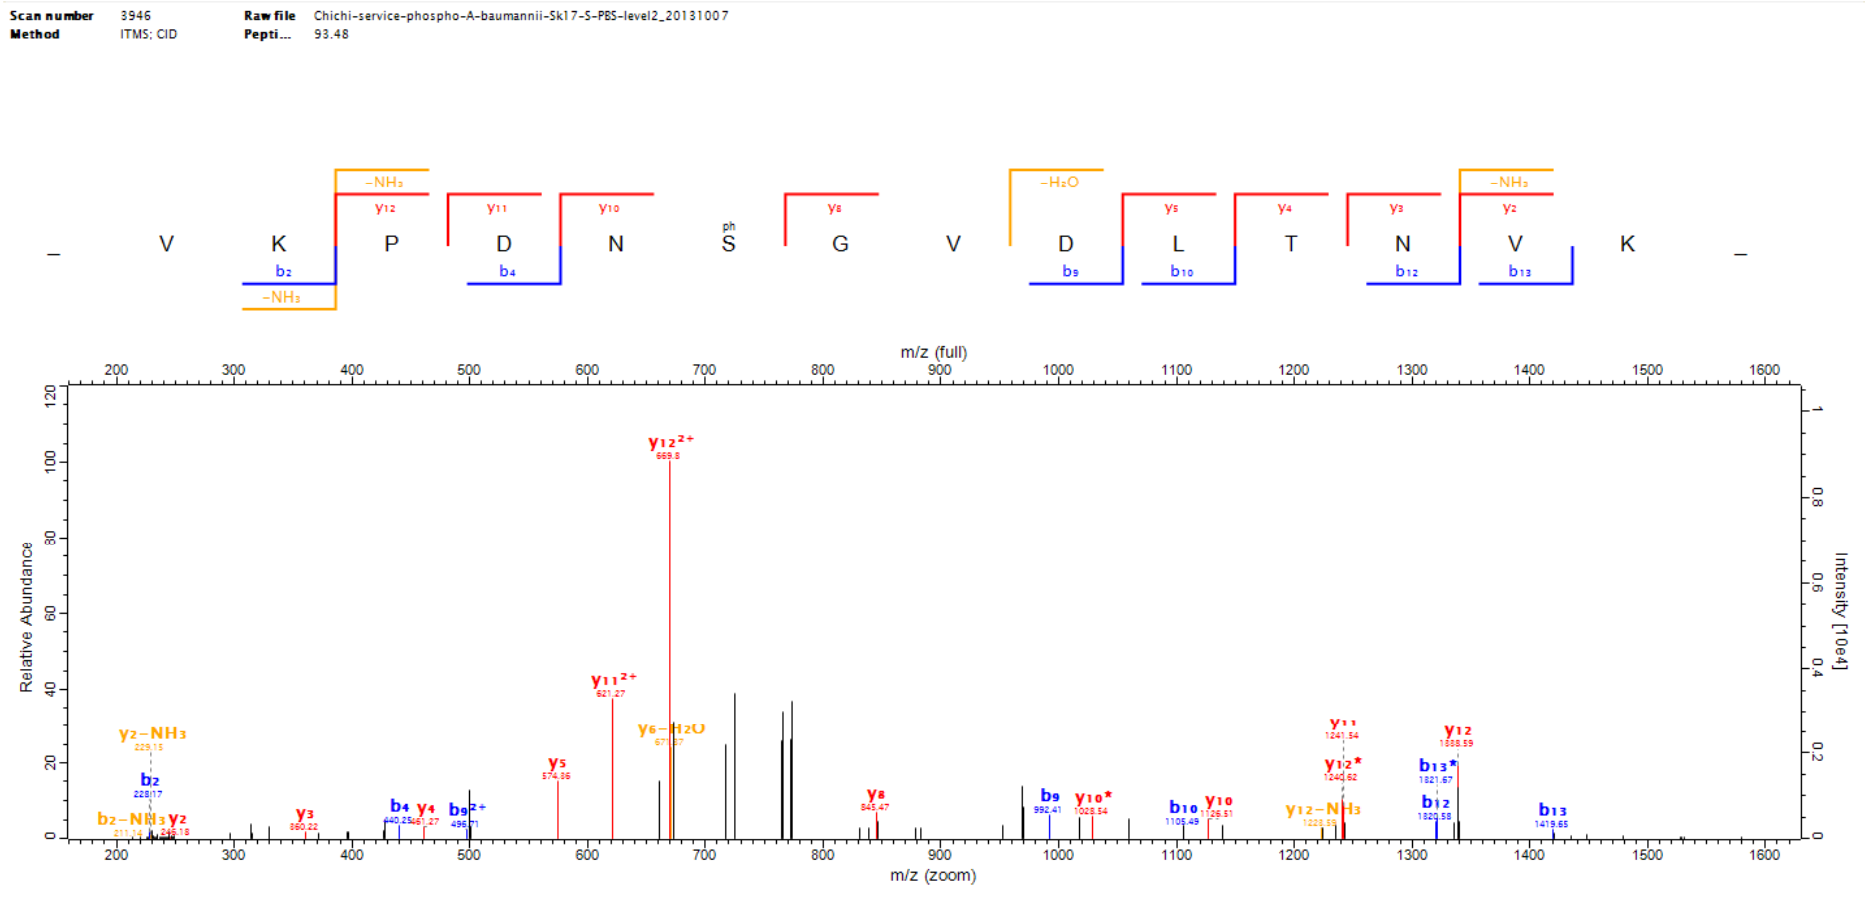

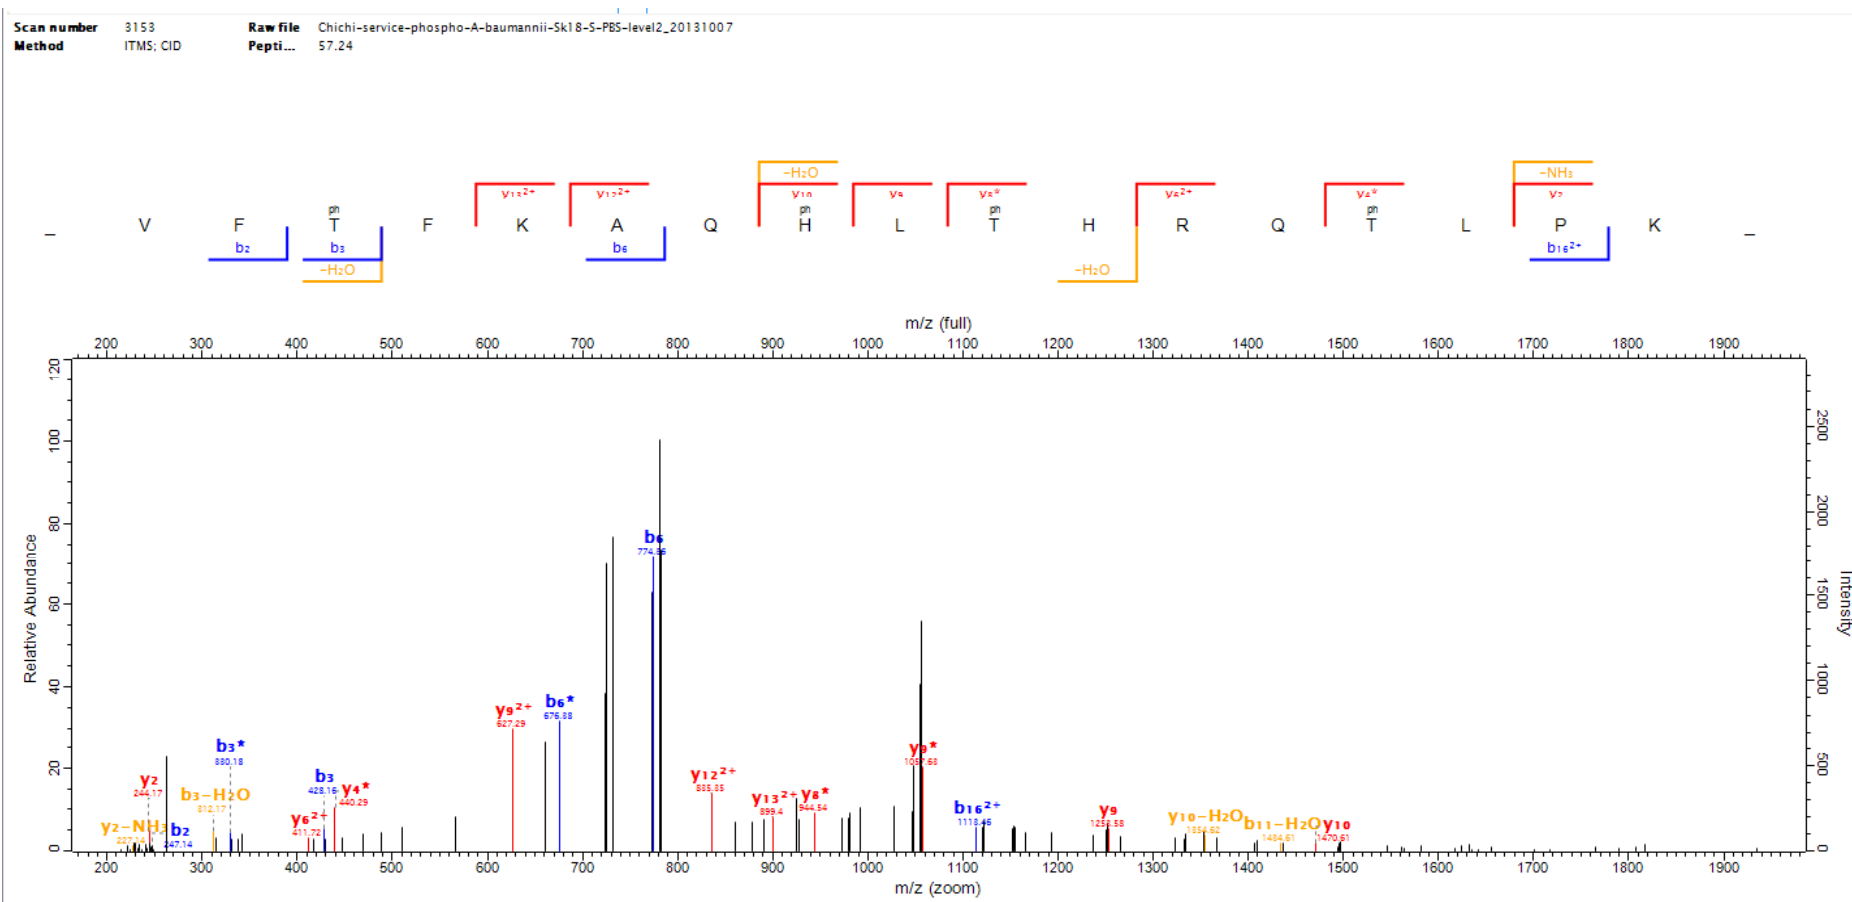

Scan number 15152 Raw file Chichi-service-phospho-A-baumannii-Sk17-S-PBS-level1\_20131023  
 Method ITMS: CID Pepti... 52.78

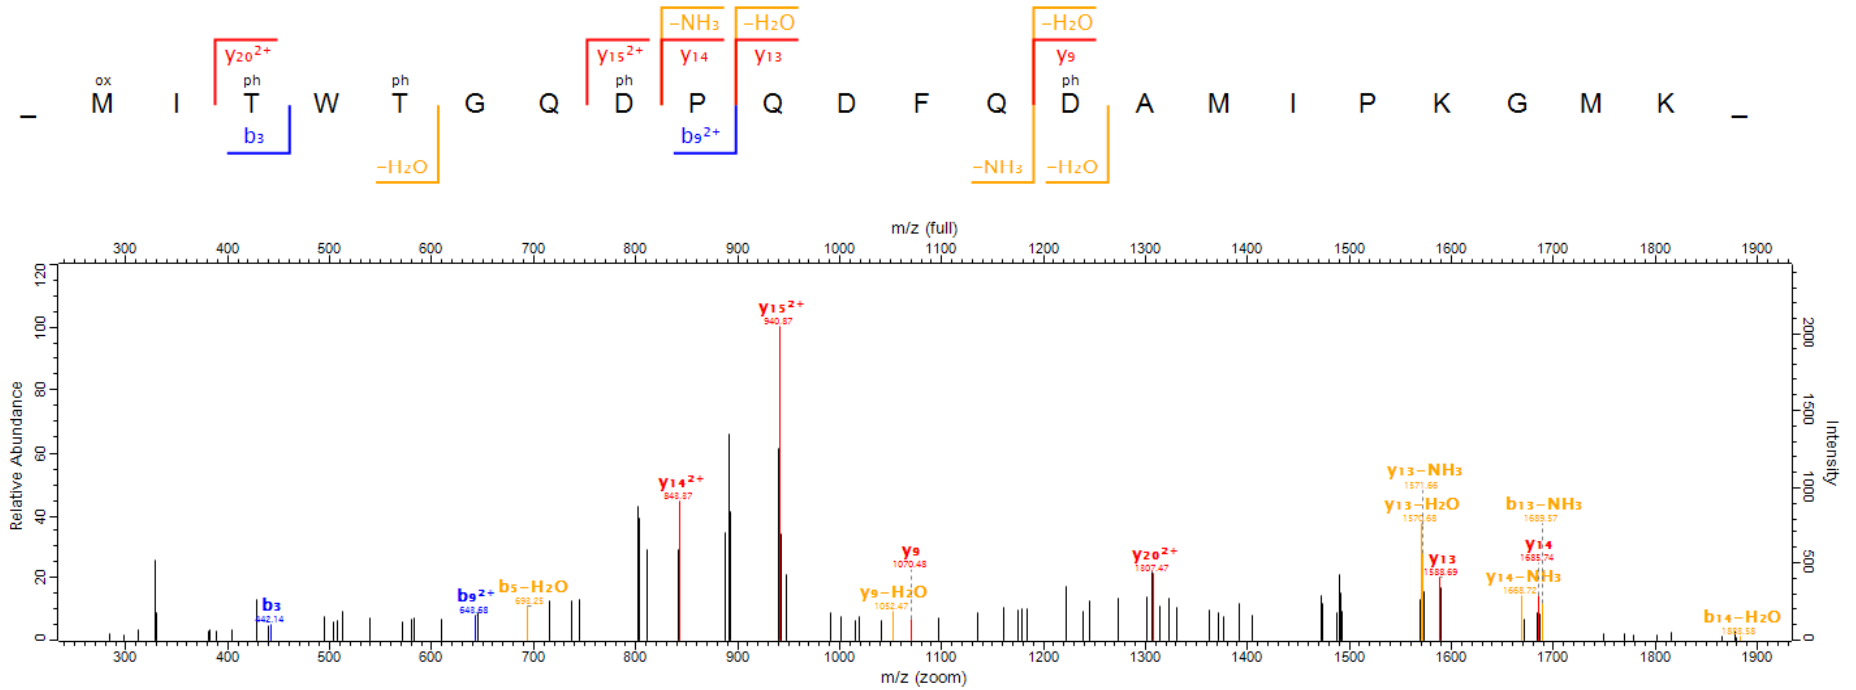

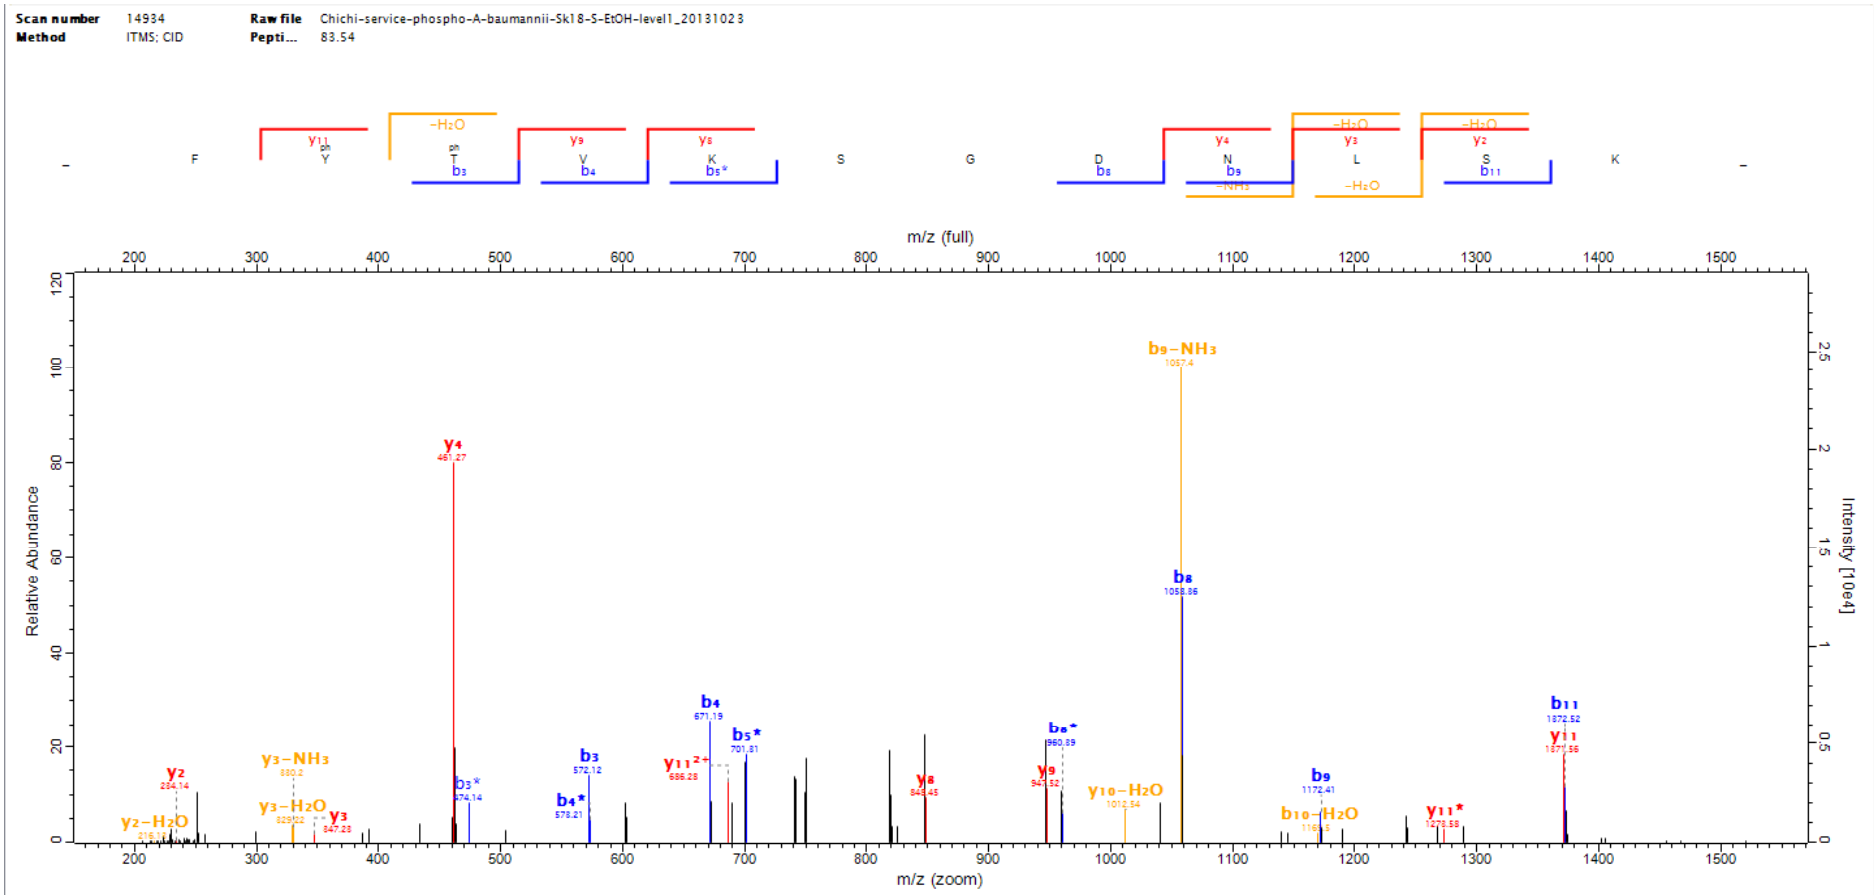

Scan number 15985 Raw file Chichi-service-phospho-A-baumanni-Sk17-5-PBS-level1\_20131023  
 Method ITMS: CID Pepti... 85.77

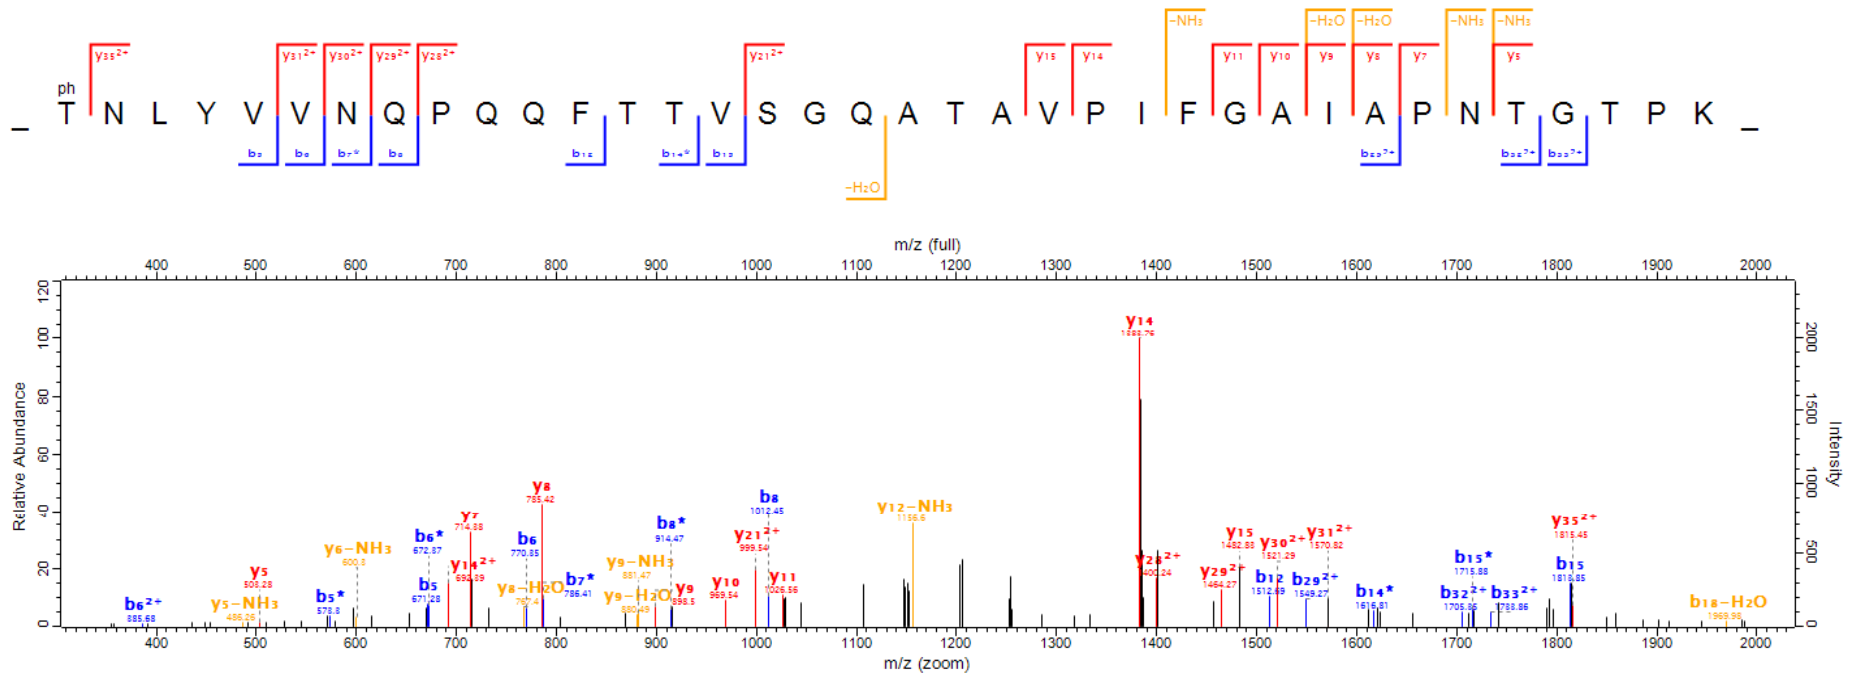

Scan number 10006 Raw file Chichi-service-phospho-A-baumannii-Sk18-5-PBS-level2\_20131007  
 Method ITMS; CID Pepti... 65.48

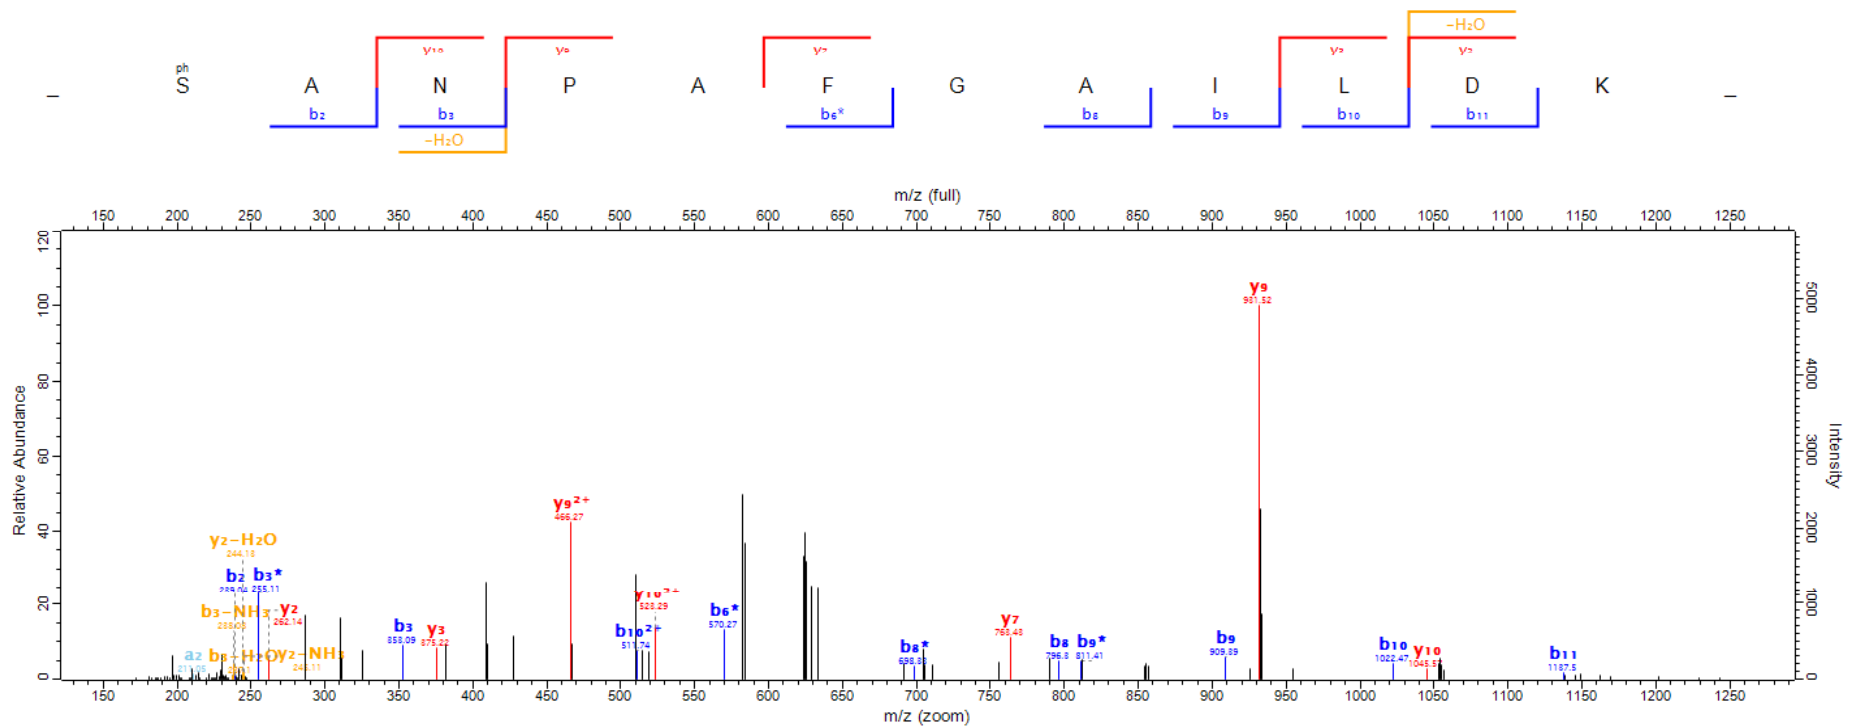



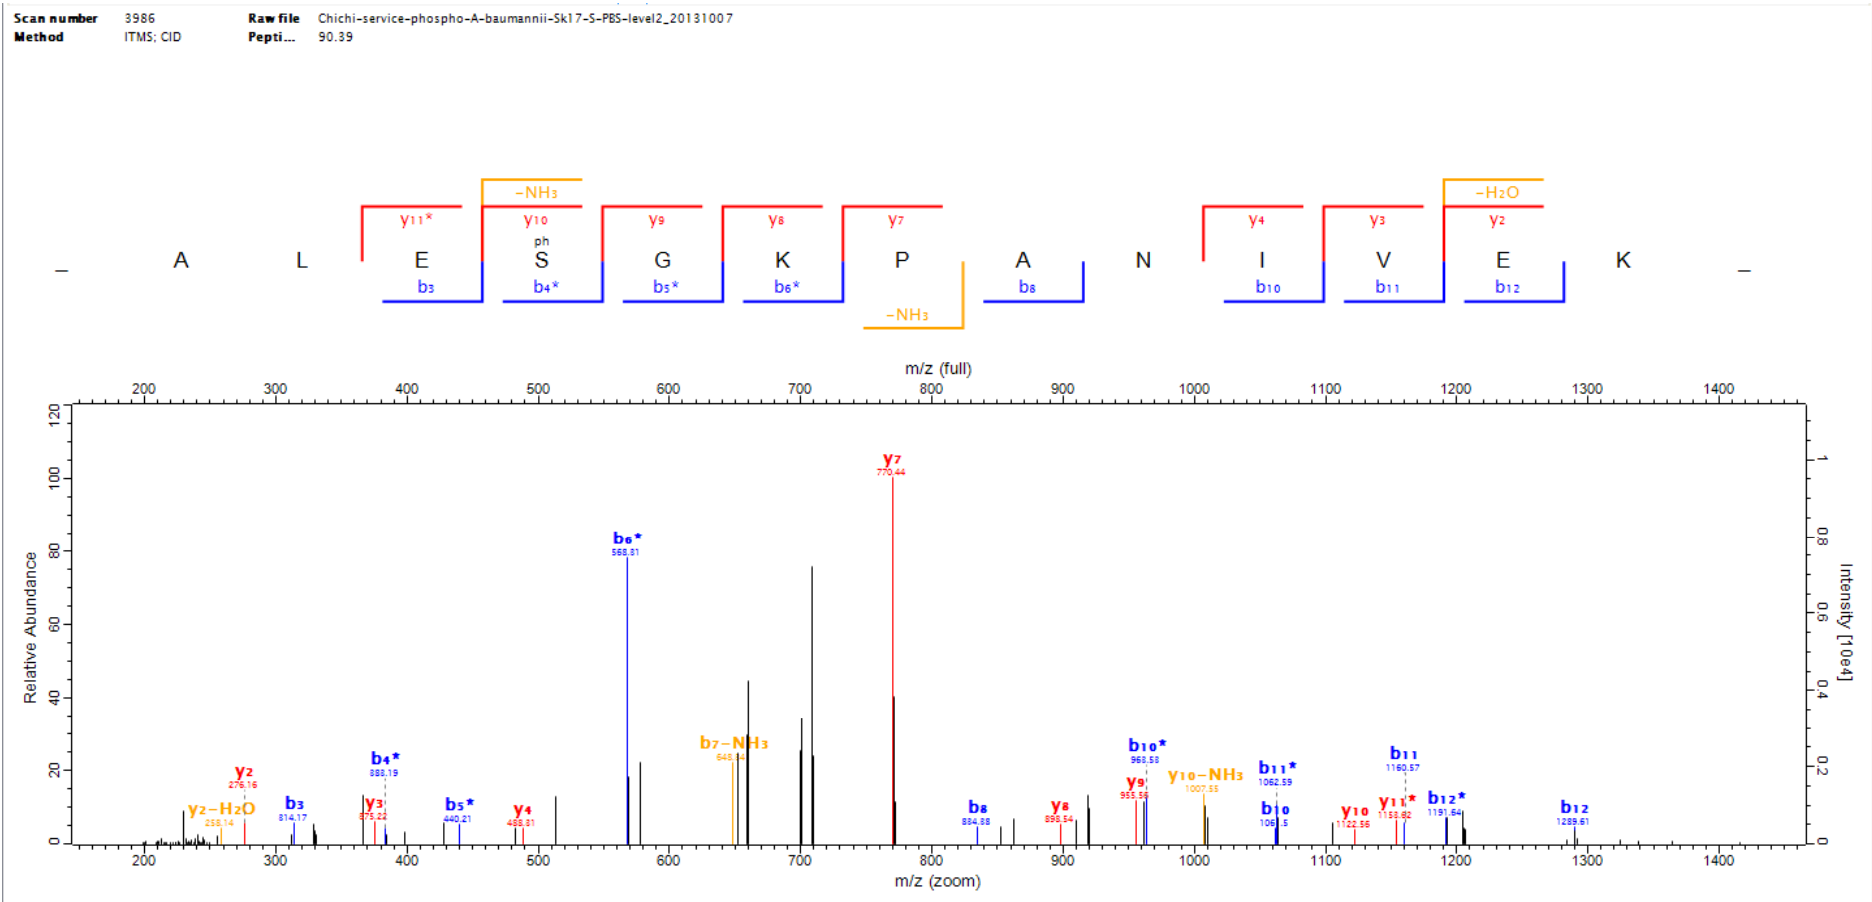

62-1

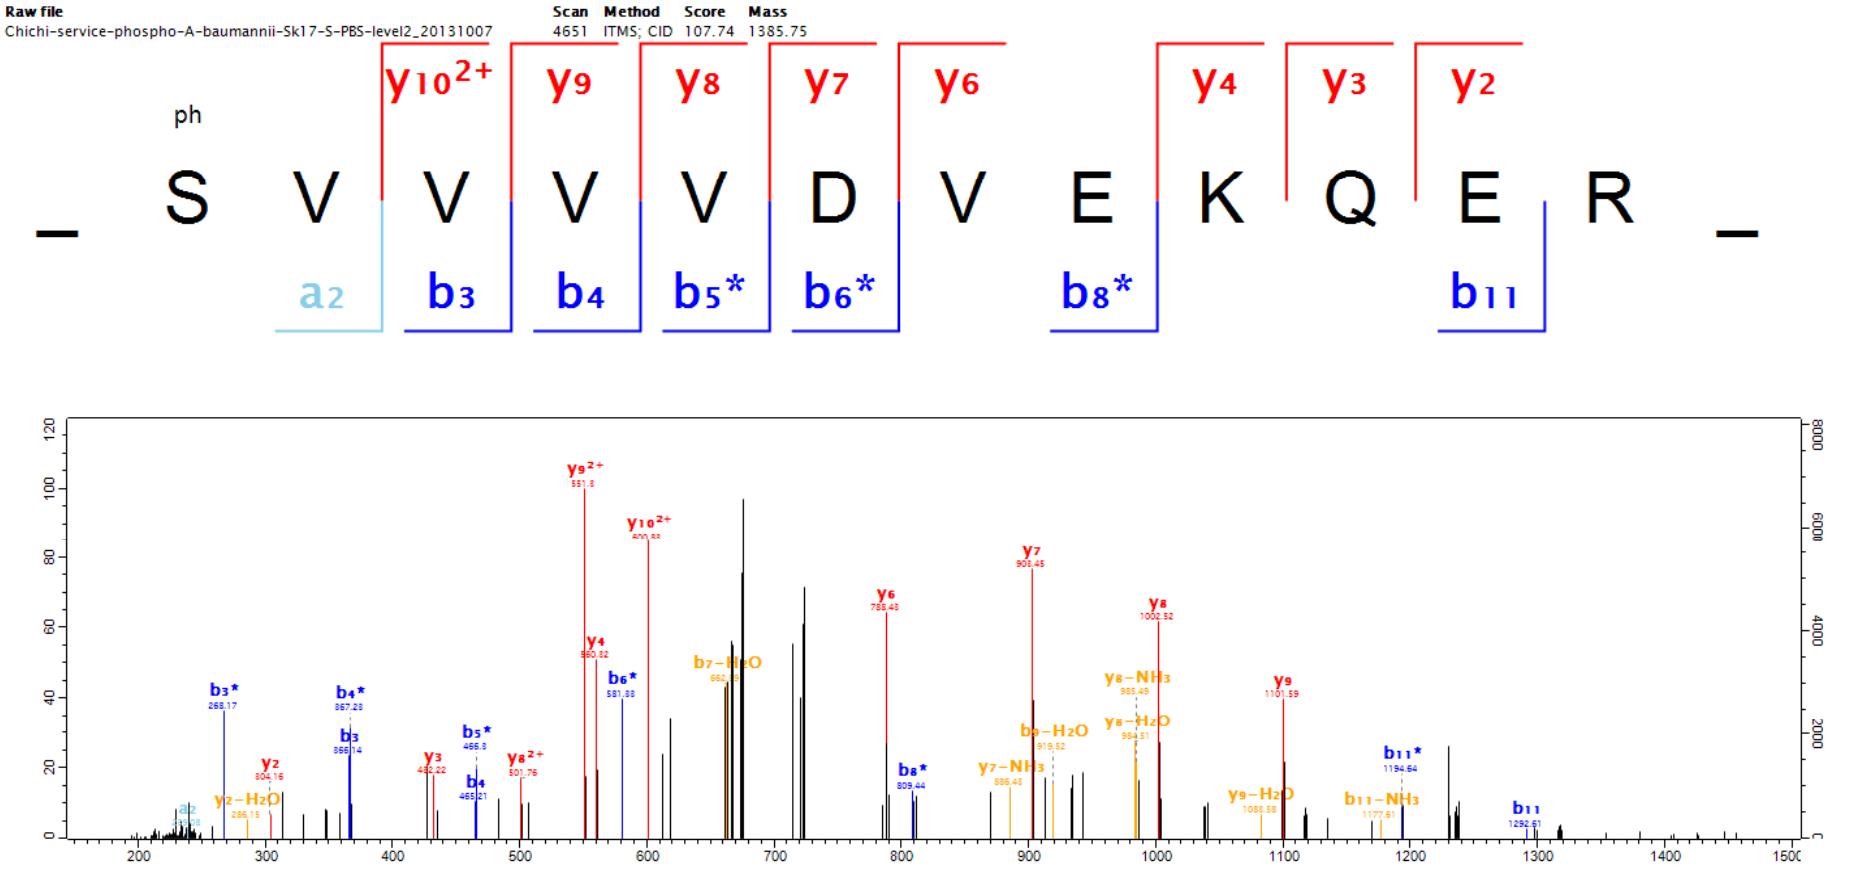

62-2

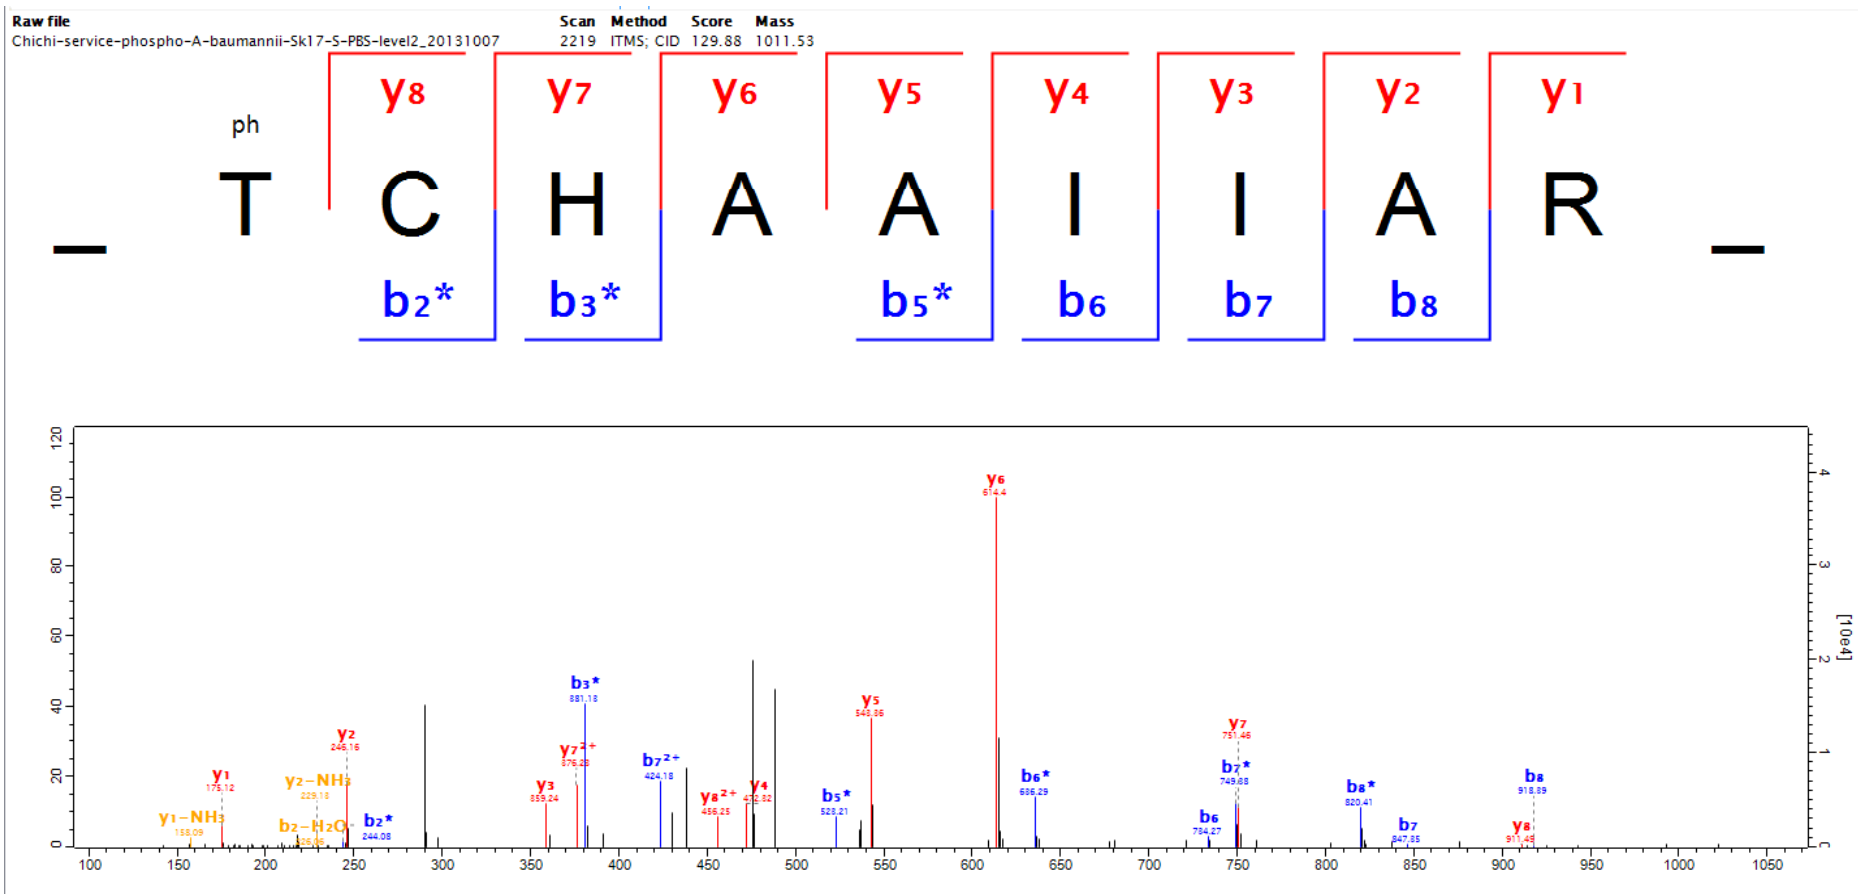

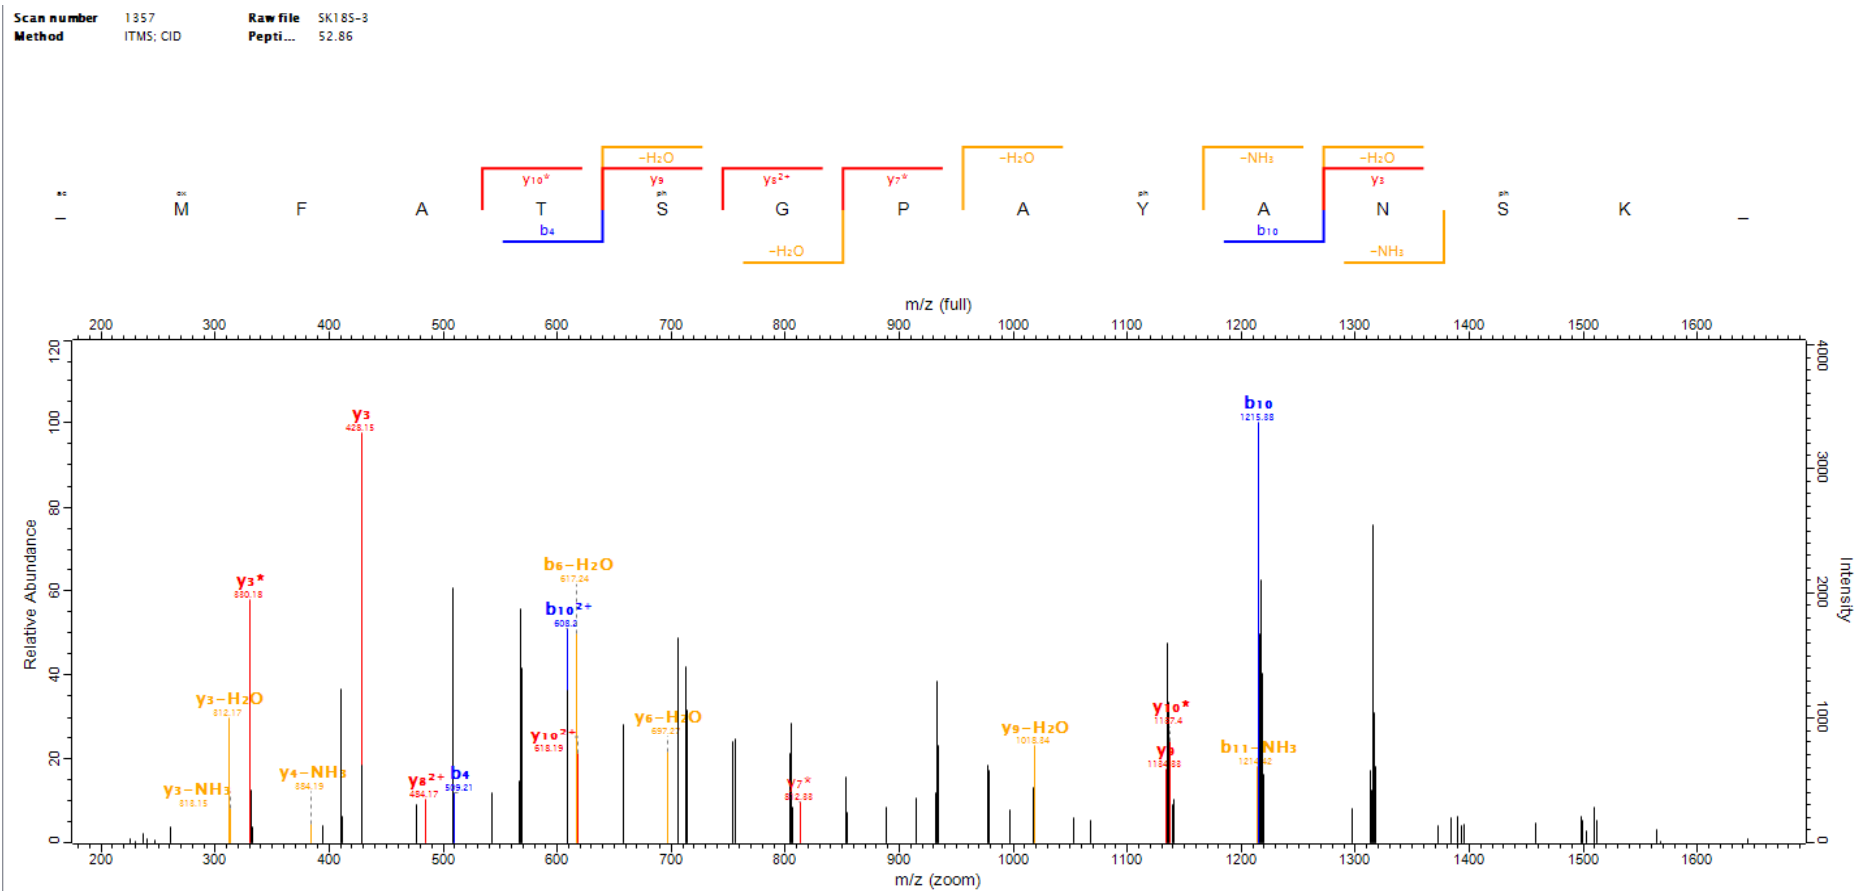

Scan number 8381 Raw file Chichi-service-phospho-A-baumannii-Sk17-S-EtOH-level1\_20131023  
 Method ITMS: CID Pepti... 57.05

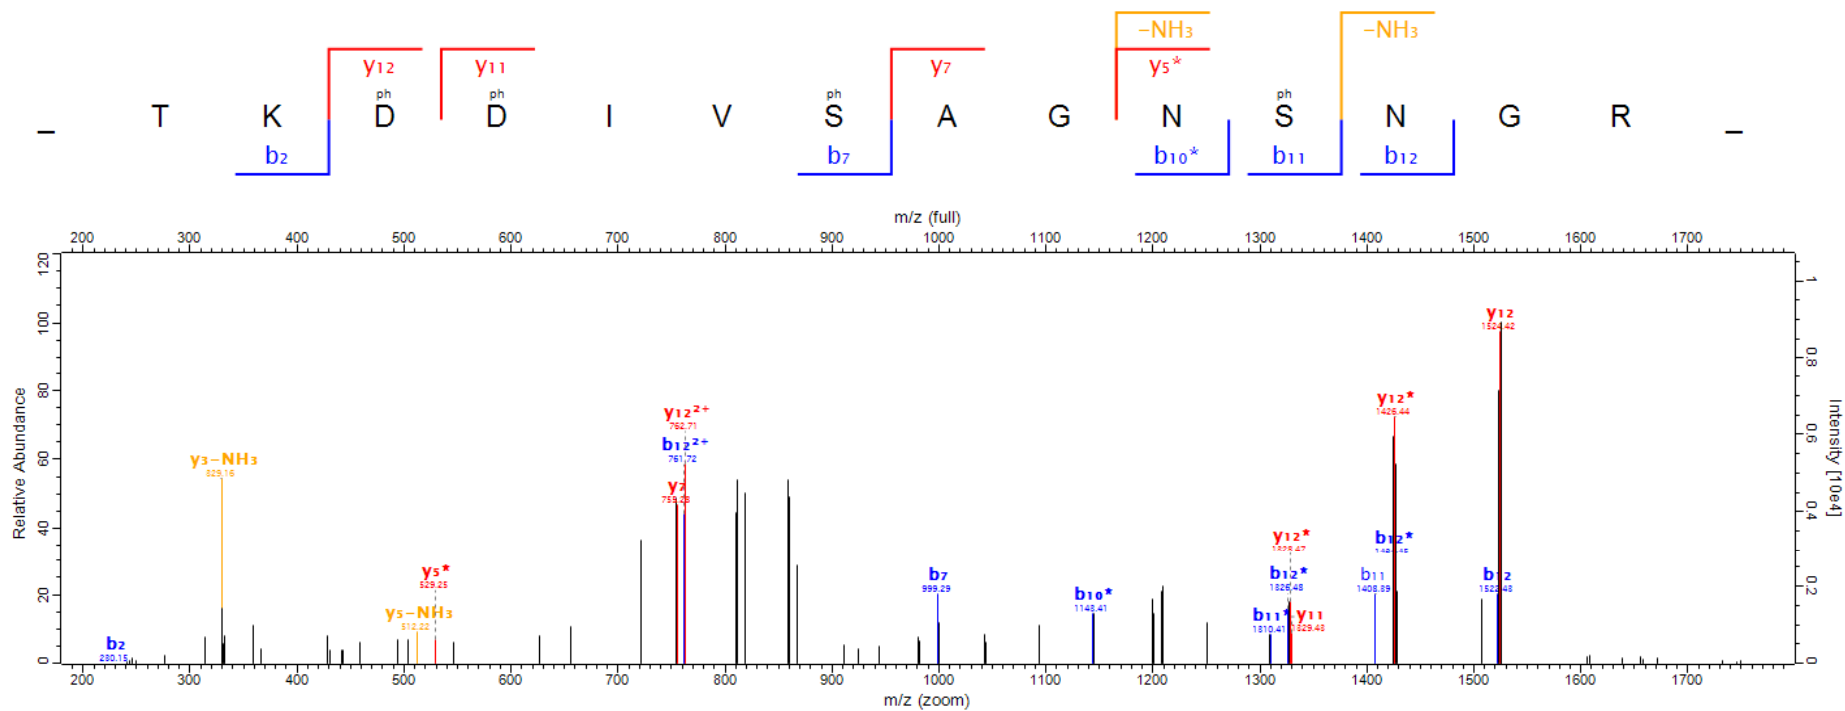

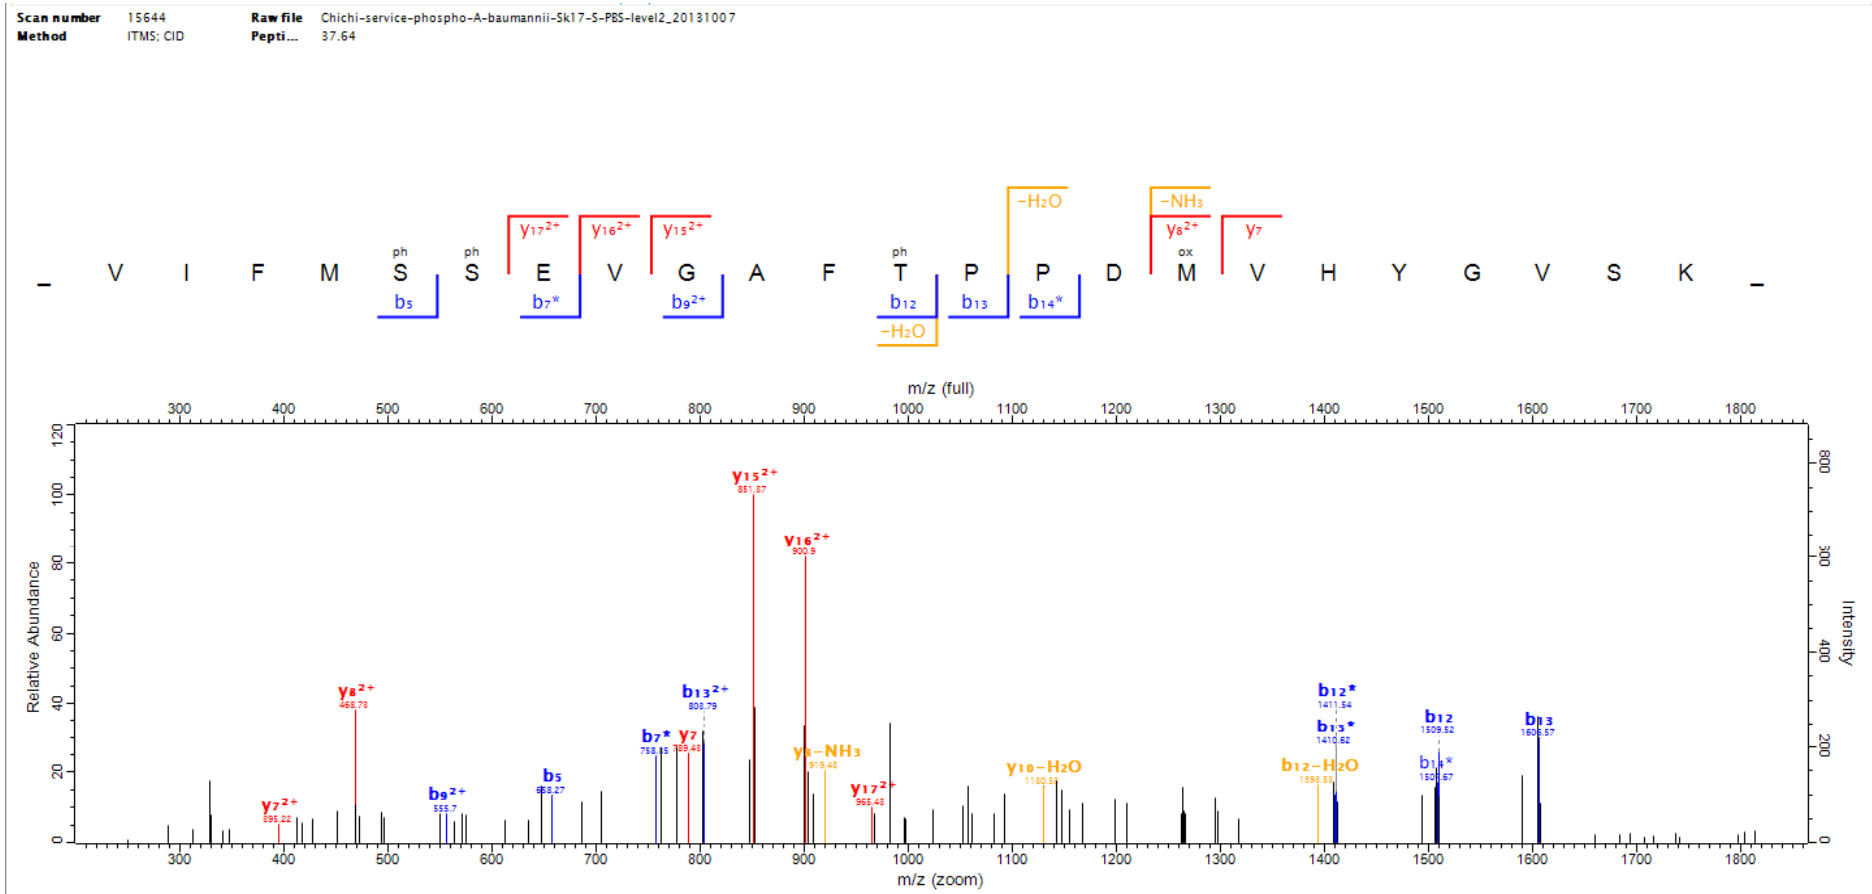

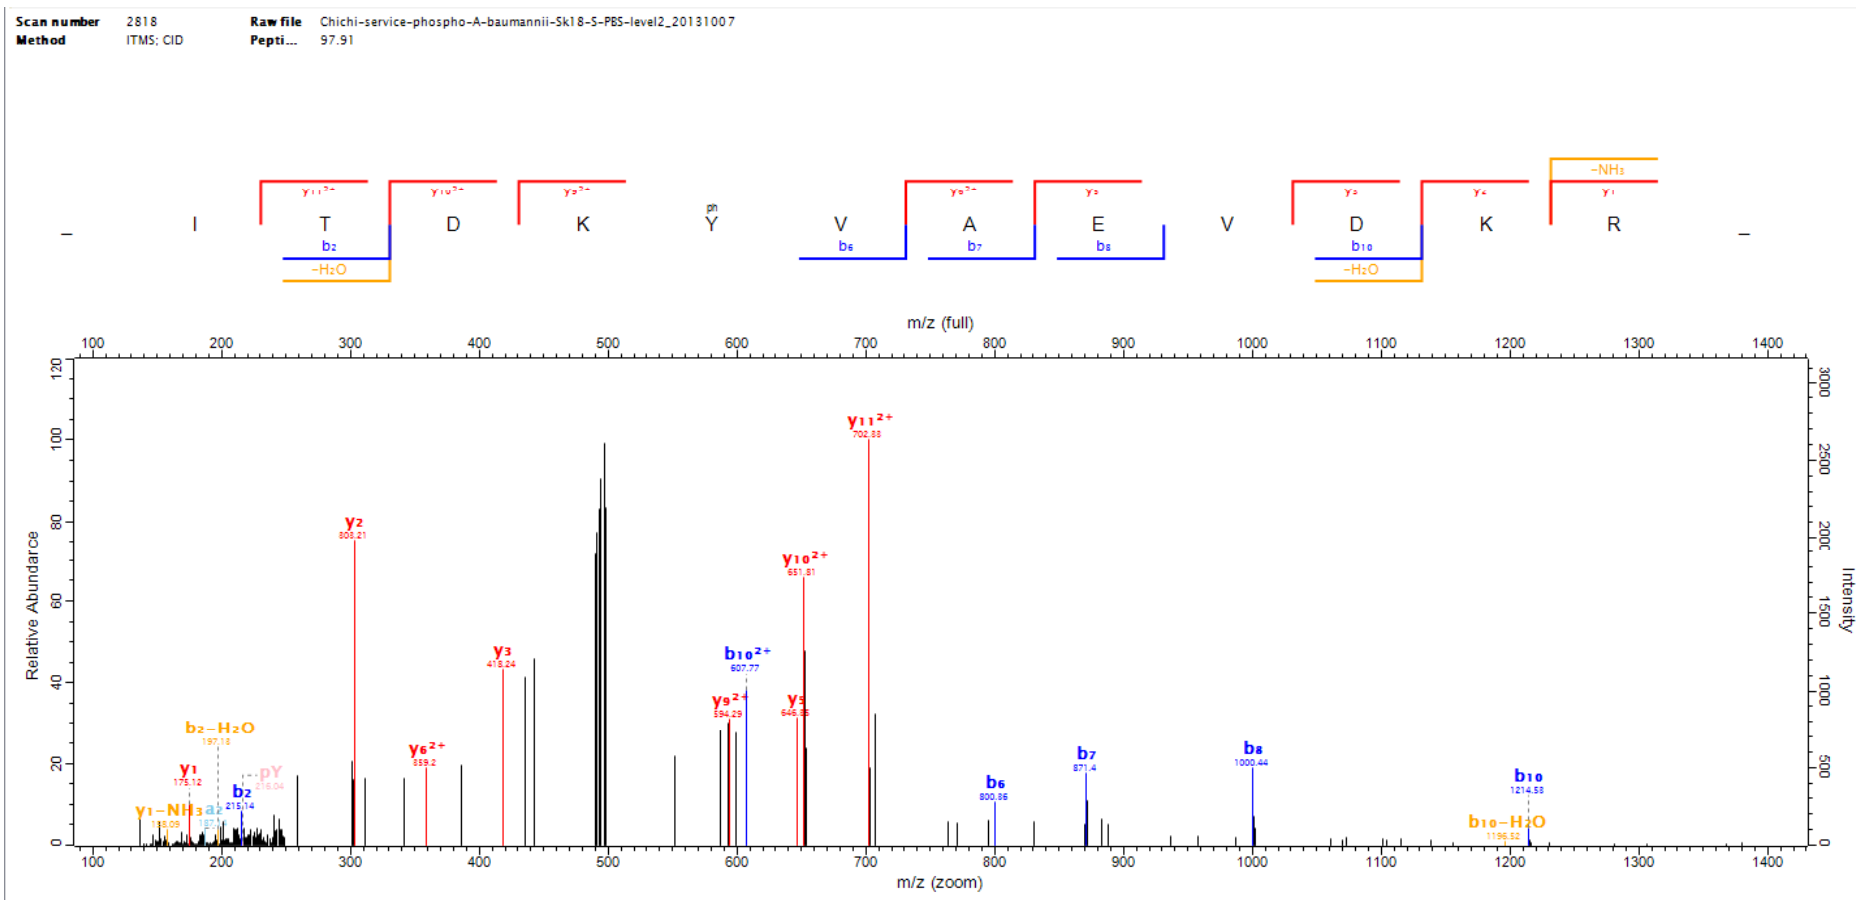

67-1

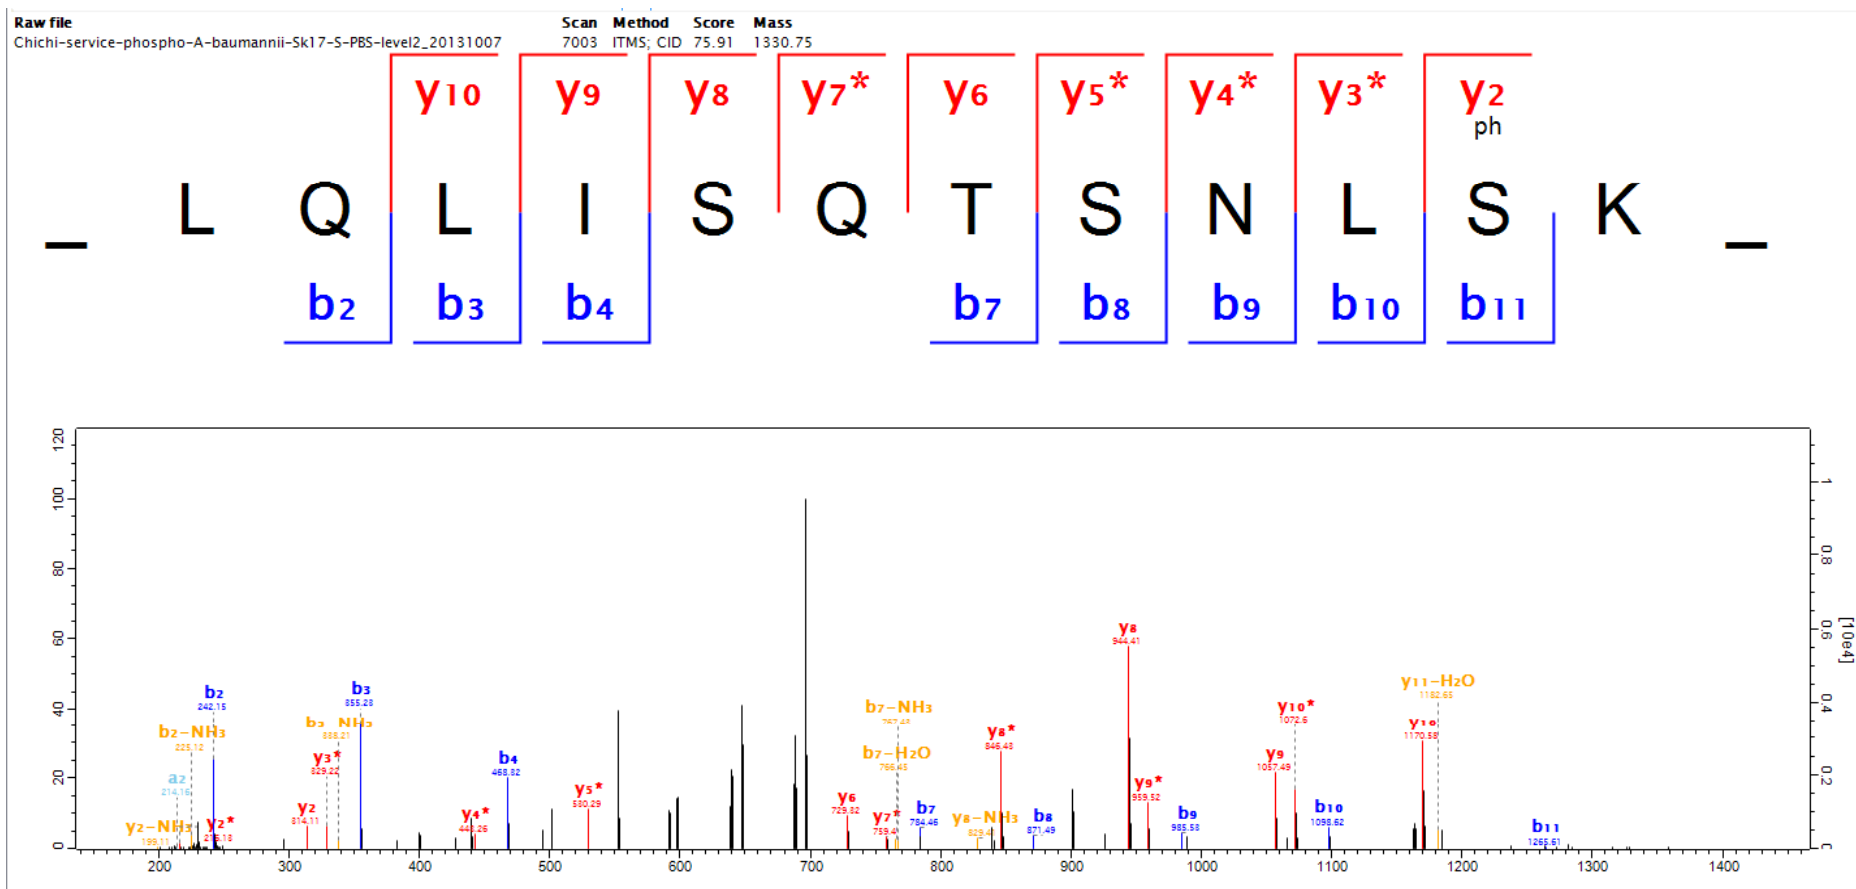



67-2

Scan number 7348 Raw file Chichi-service-phospho-A-baumannii-Sk17-5-PBS-level2\_20131007  
 Method ITMS: CID Pepti... 93.24

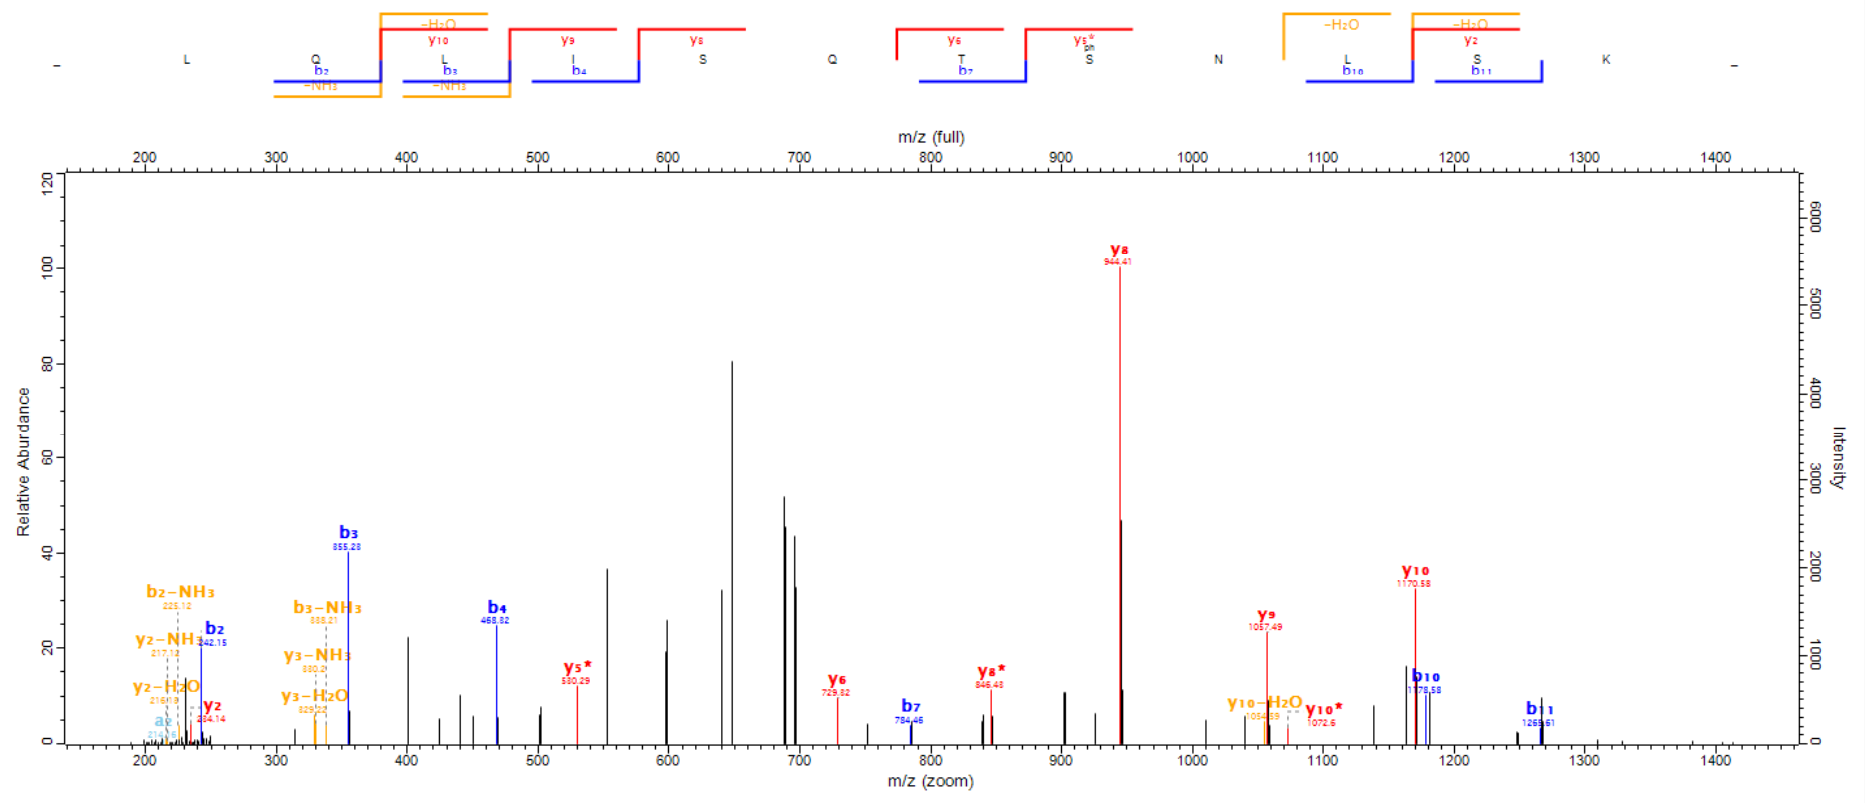

67-3

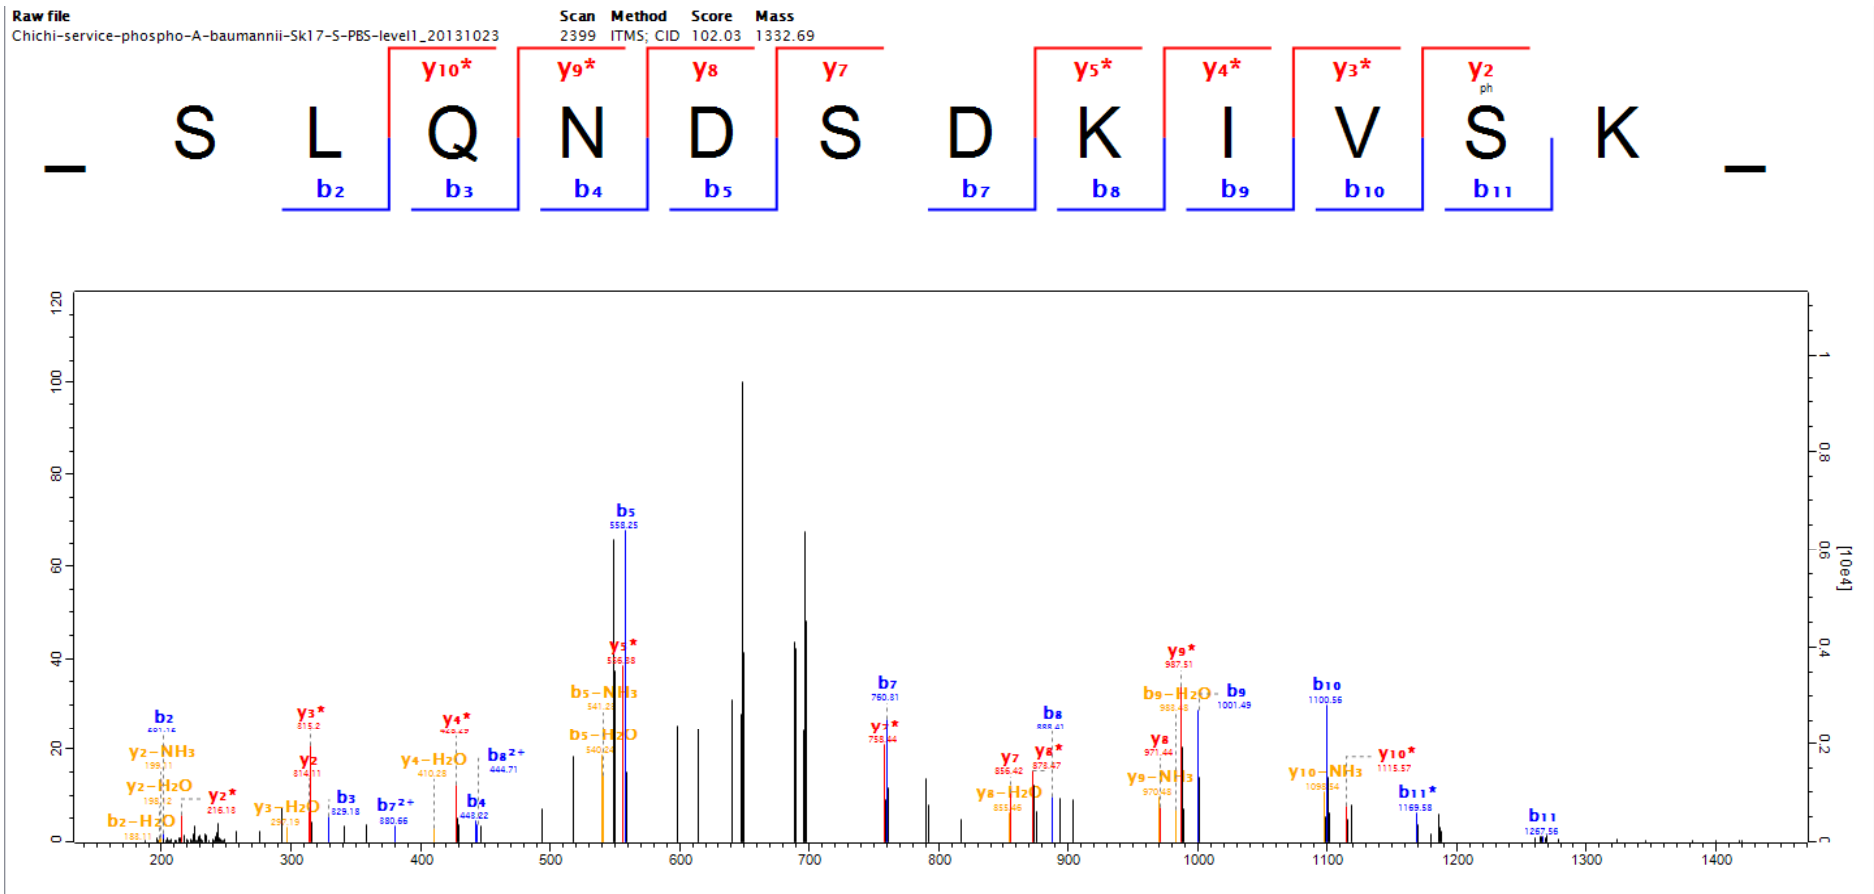

Scan number 16781 Raw file Chichi-service-phospho-A-baumannii-Sk18-5-PBS-level1\_20131023  
 Method ITMS; CID Pepti... 59.73

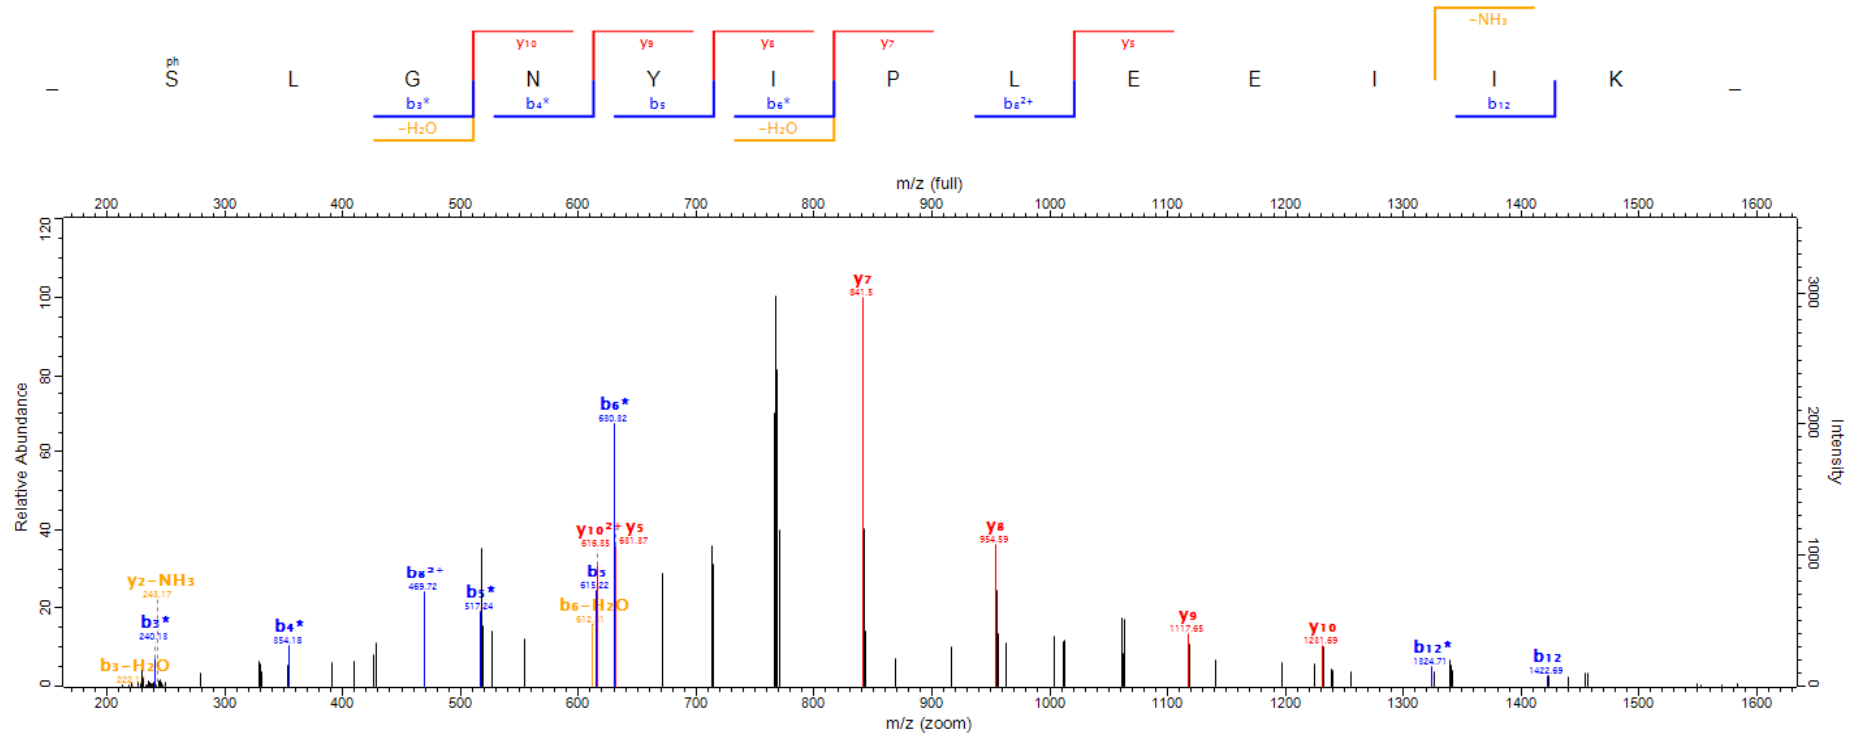

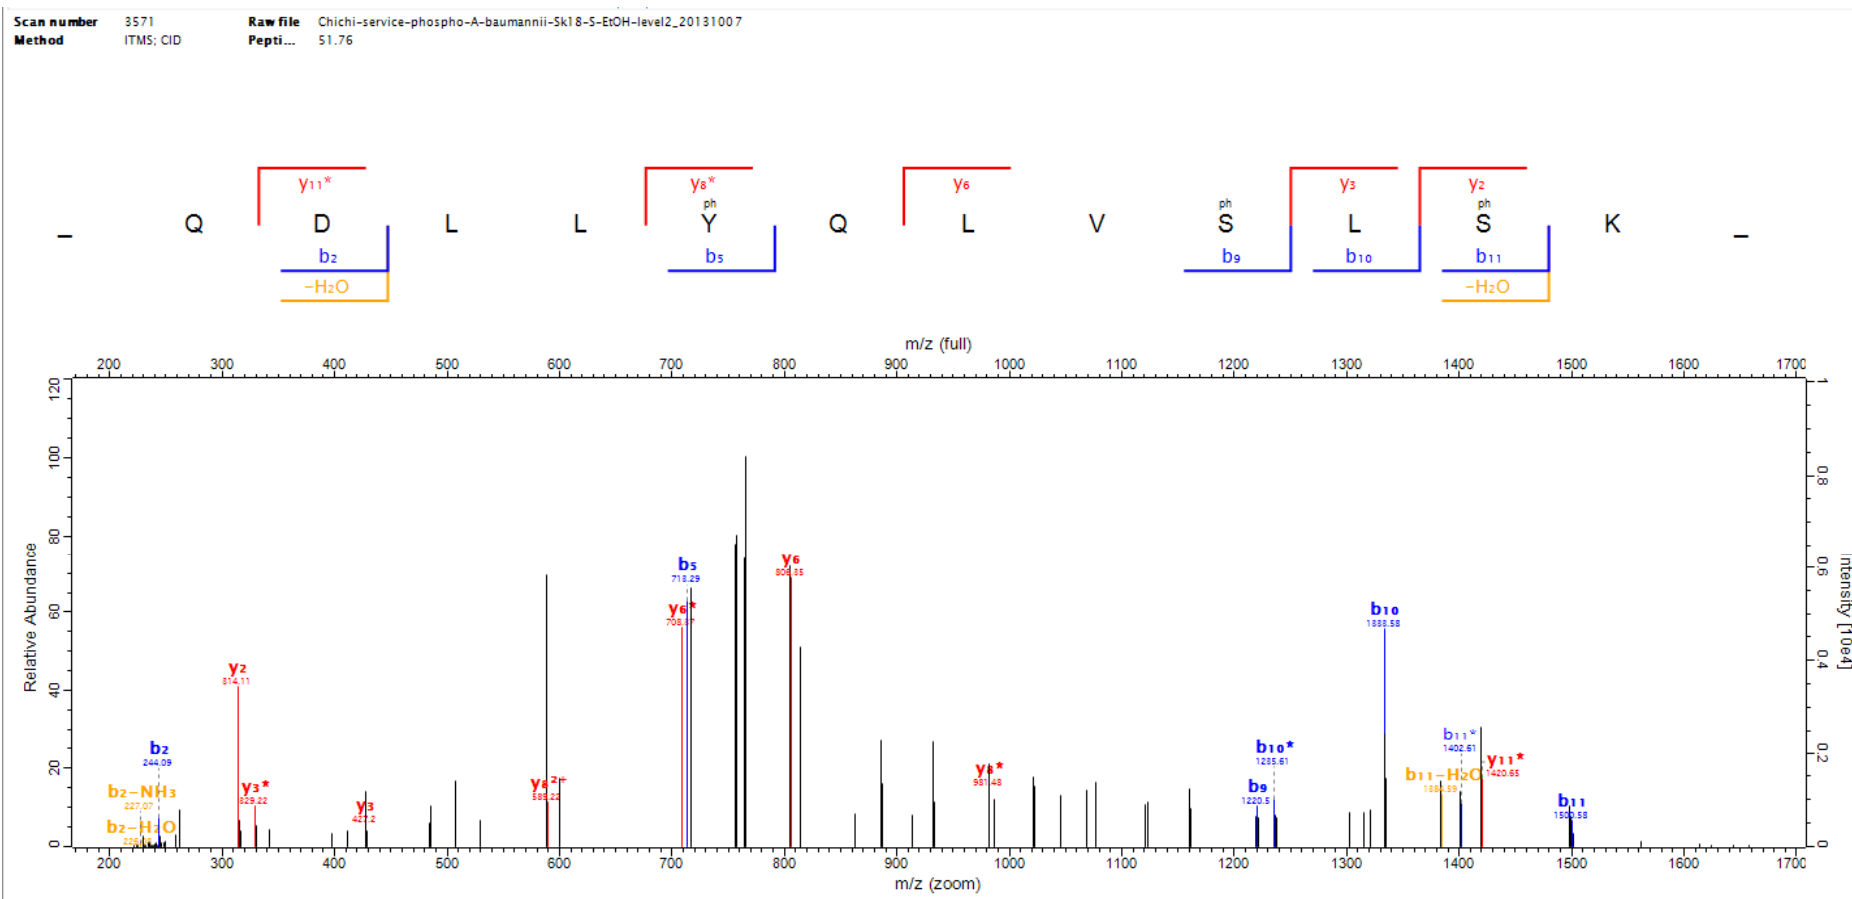

Scan number 1147 Raw file Chichi-service-phospho-A-baumannii-Sk18-S-PBS-level2\_20131007  
 Method ITMS: CID Pepti... 40.14

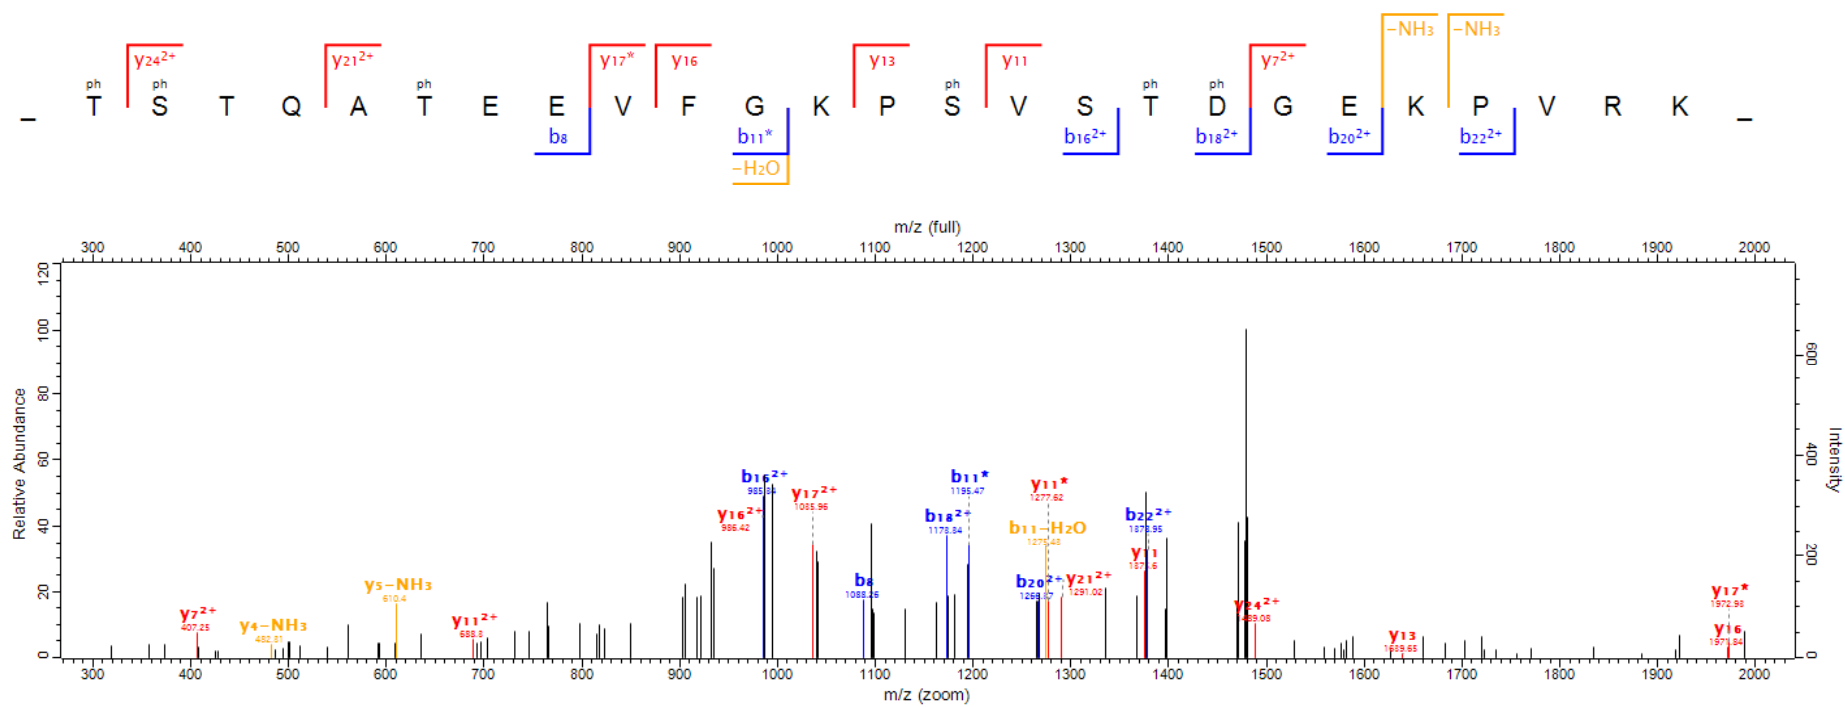

Scan number 3010 Raw file Chichi-service-phospho-A-baumannii-Sk18-5-PBS-level2\_20131007  
 Method ITMS; CID Pepti... 62.2

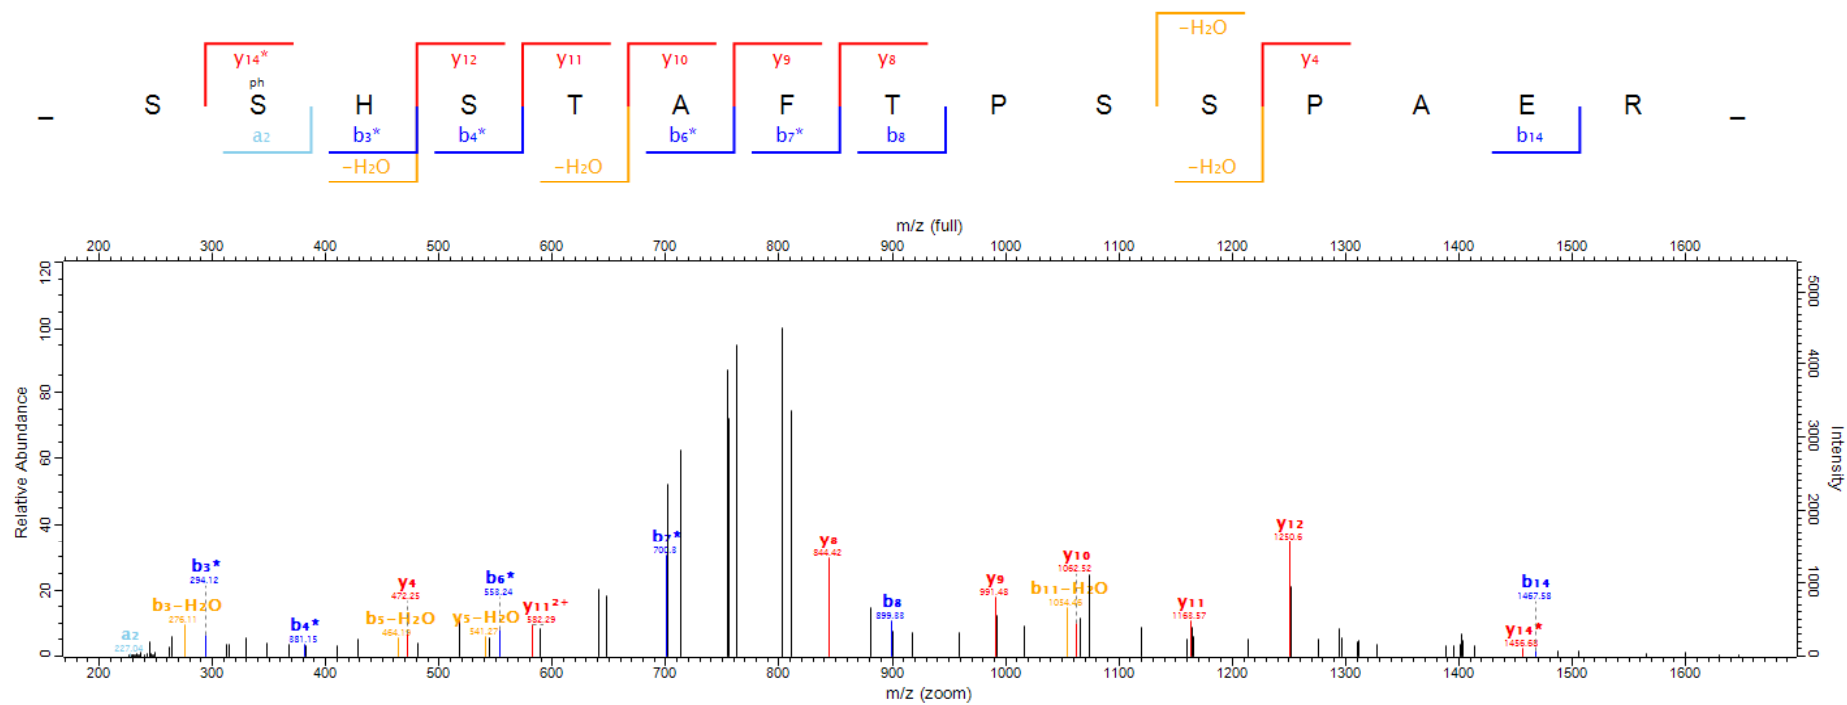

Scan number 5033 Raw file Chichi-service-phospho-A-baumannii-Sk17-5-PBS-level2\_20131007  
 Method ITMS: CID Pepti... 99.39

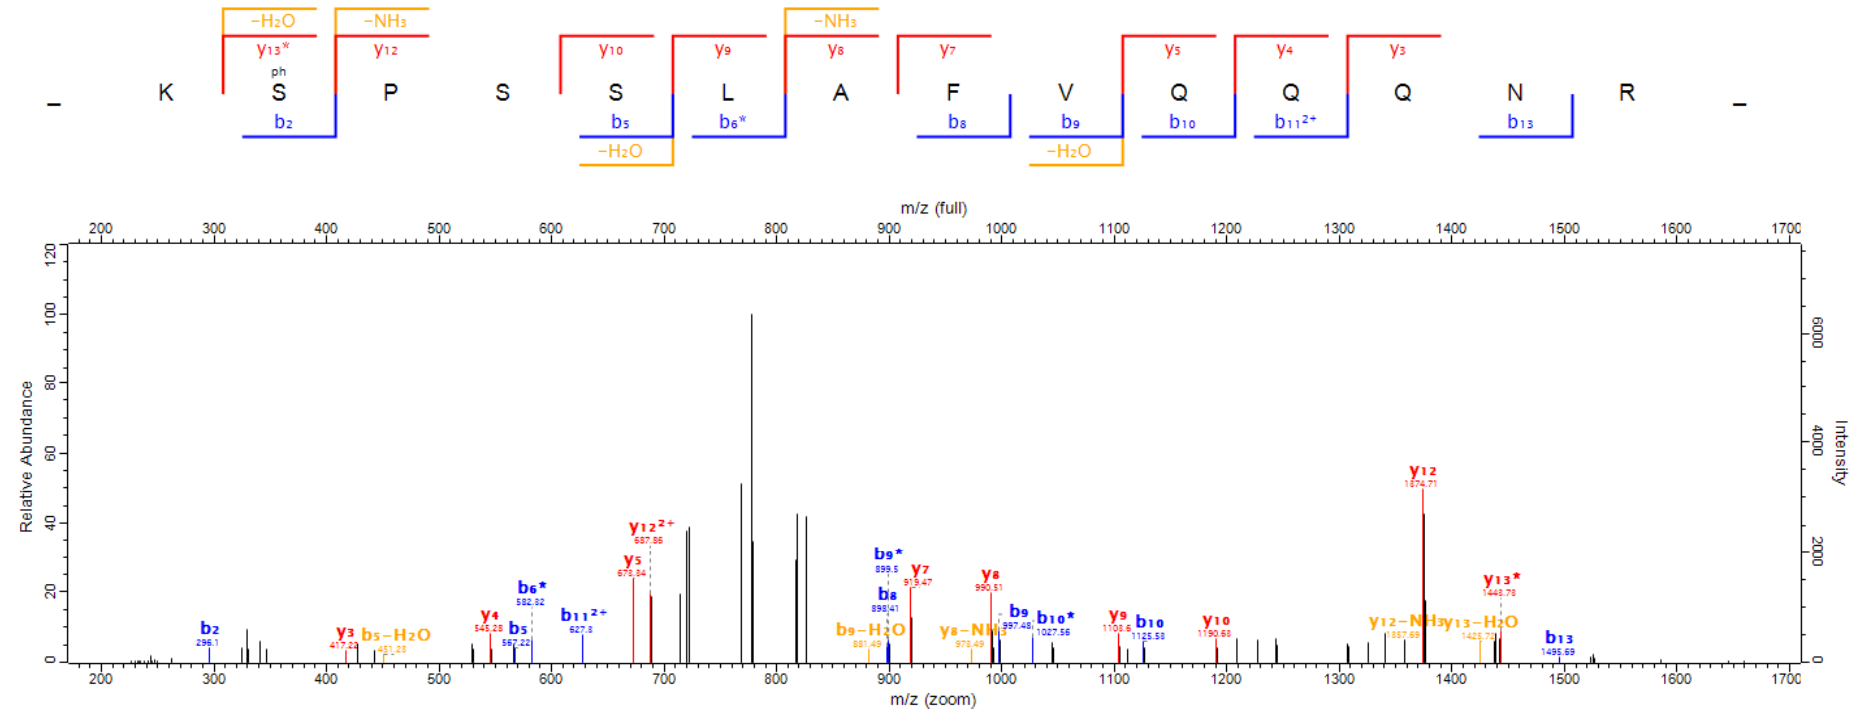

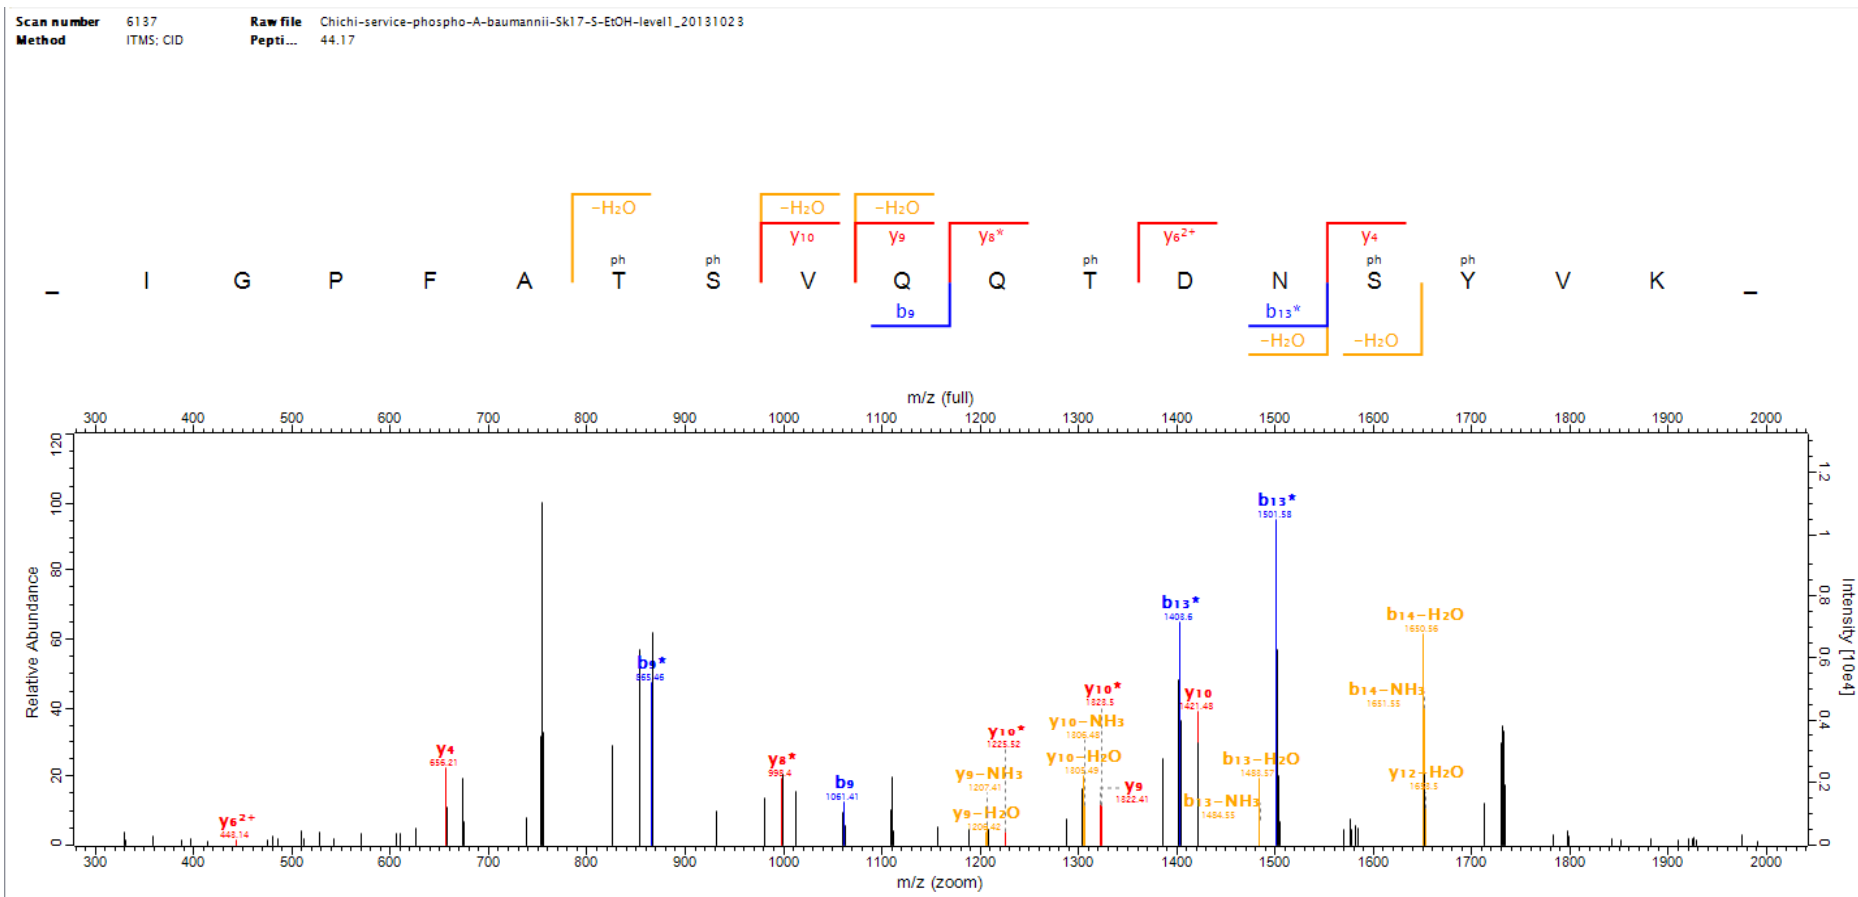



Scan number 8774 Raw file Chichi-service-phospho-A-baumannii-Sk17-S-PBS-level1\_20131023  
 Method ITMS; CID Pepti... 55.66

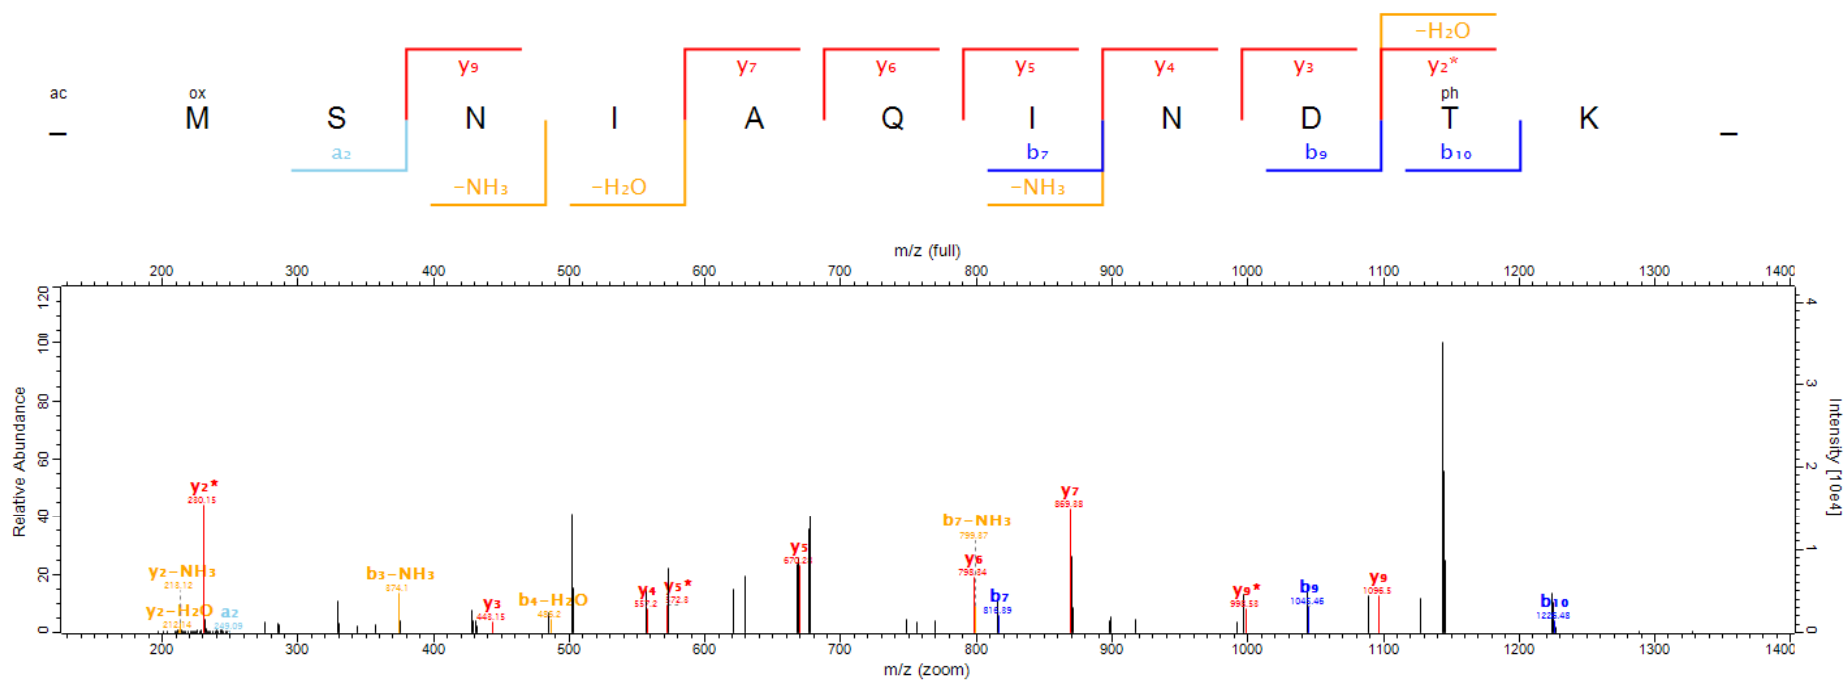

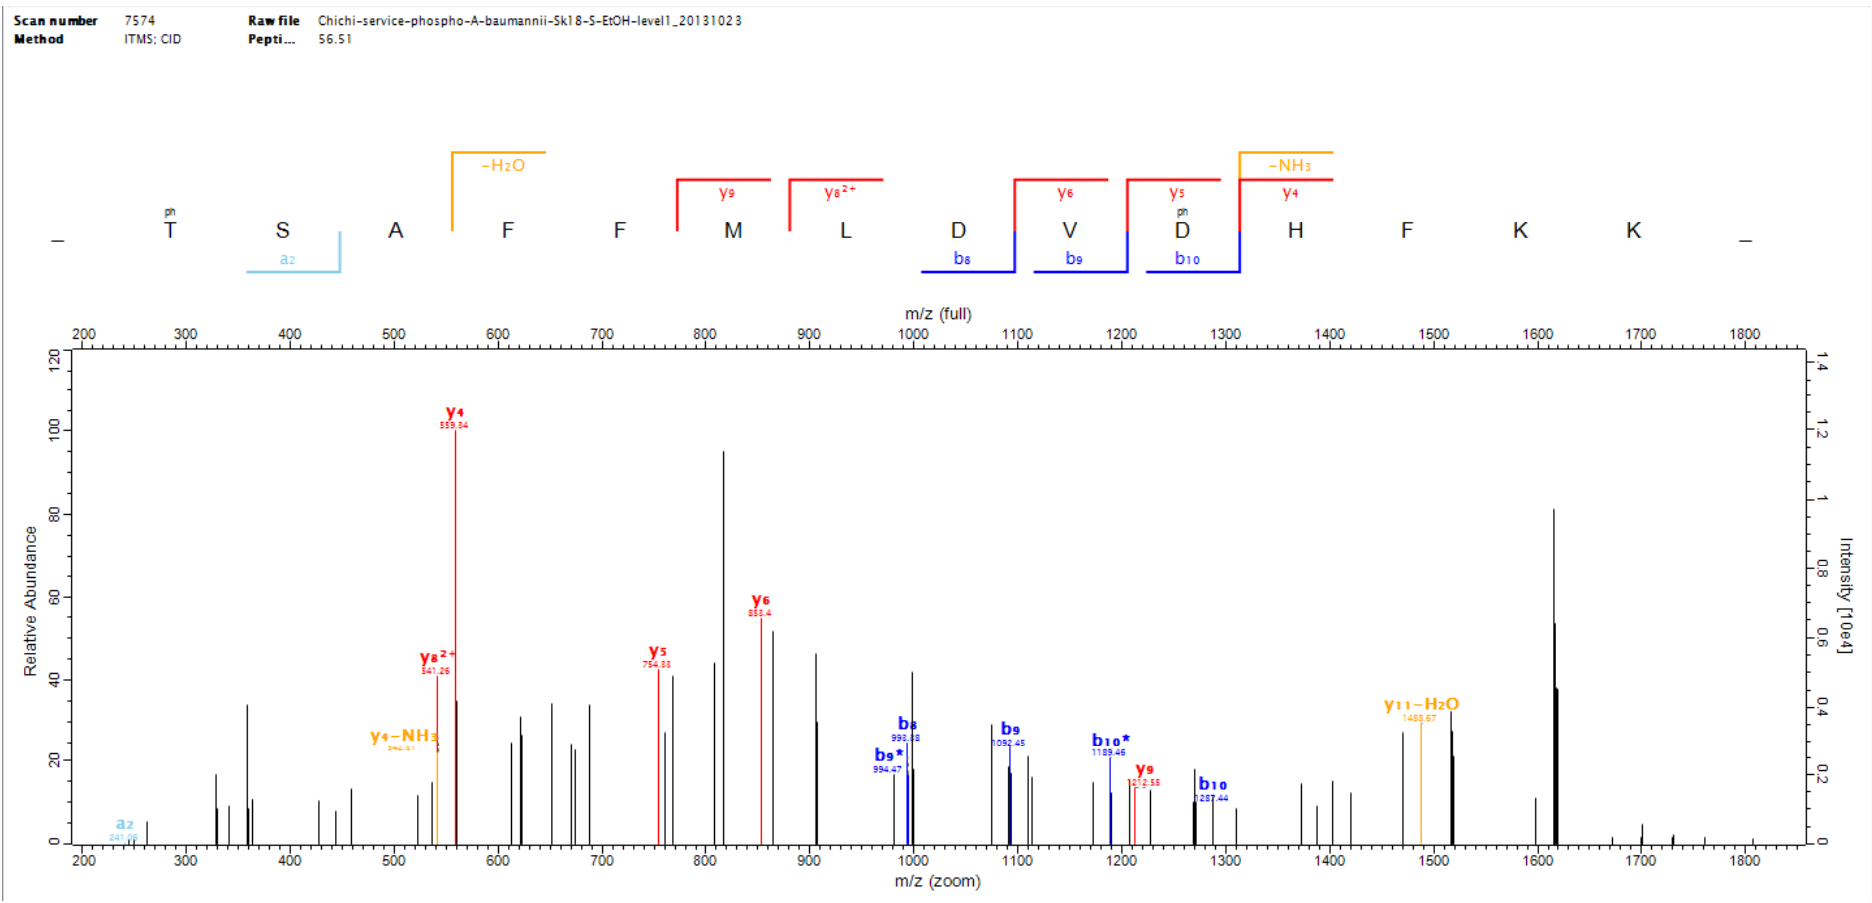

Scan number 8621 Raw file Chichi-service-phospho-A-baumannii-Sk18-S-PBS-level2\_20131007  
Method ITMS: CID Pepti... 60.31

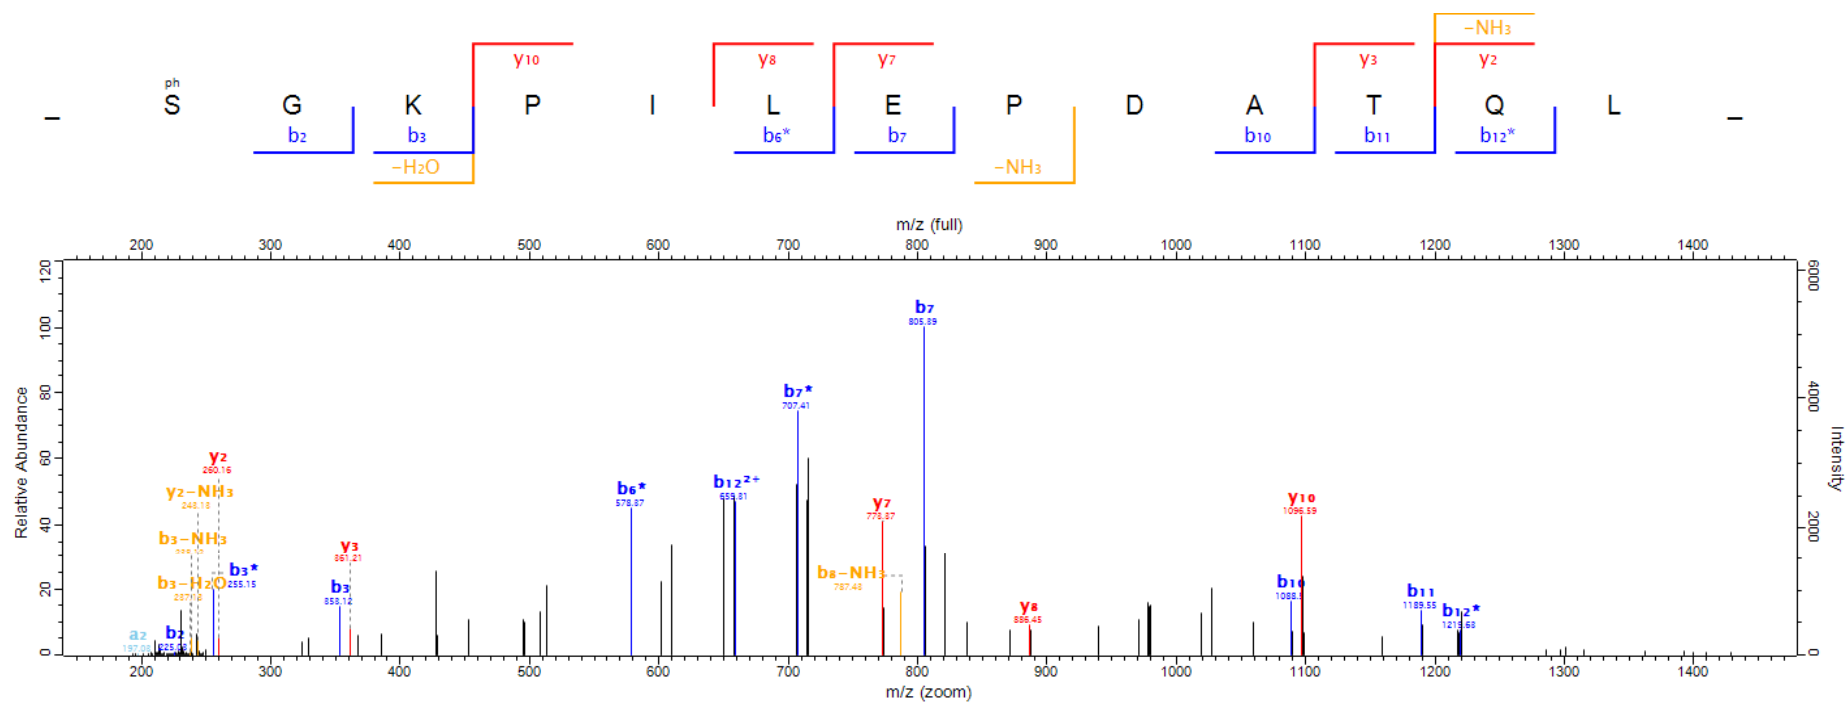

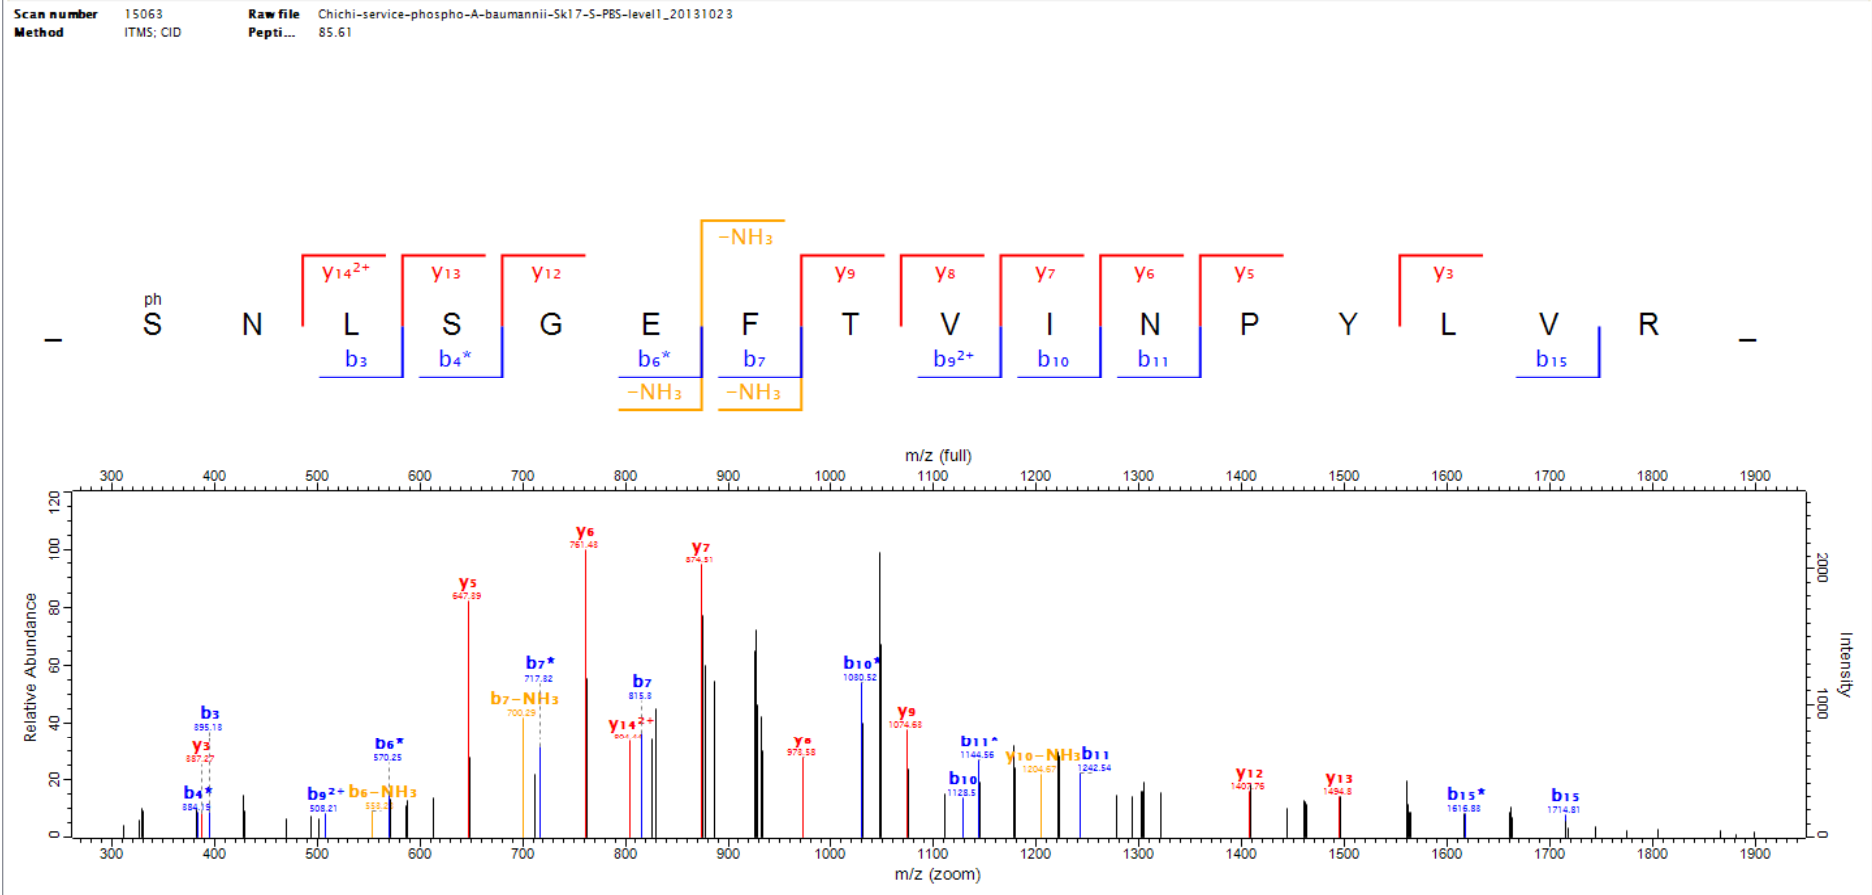

78-1

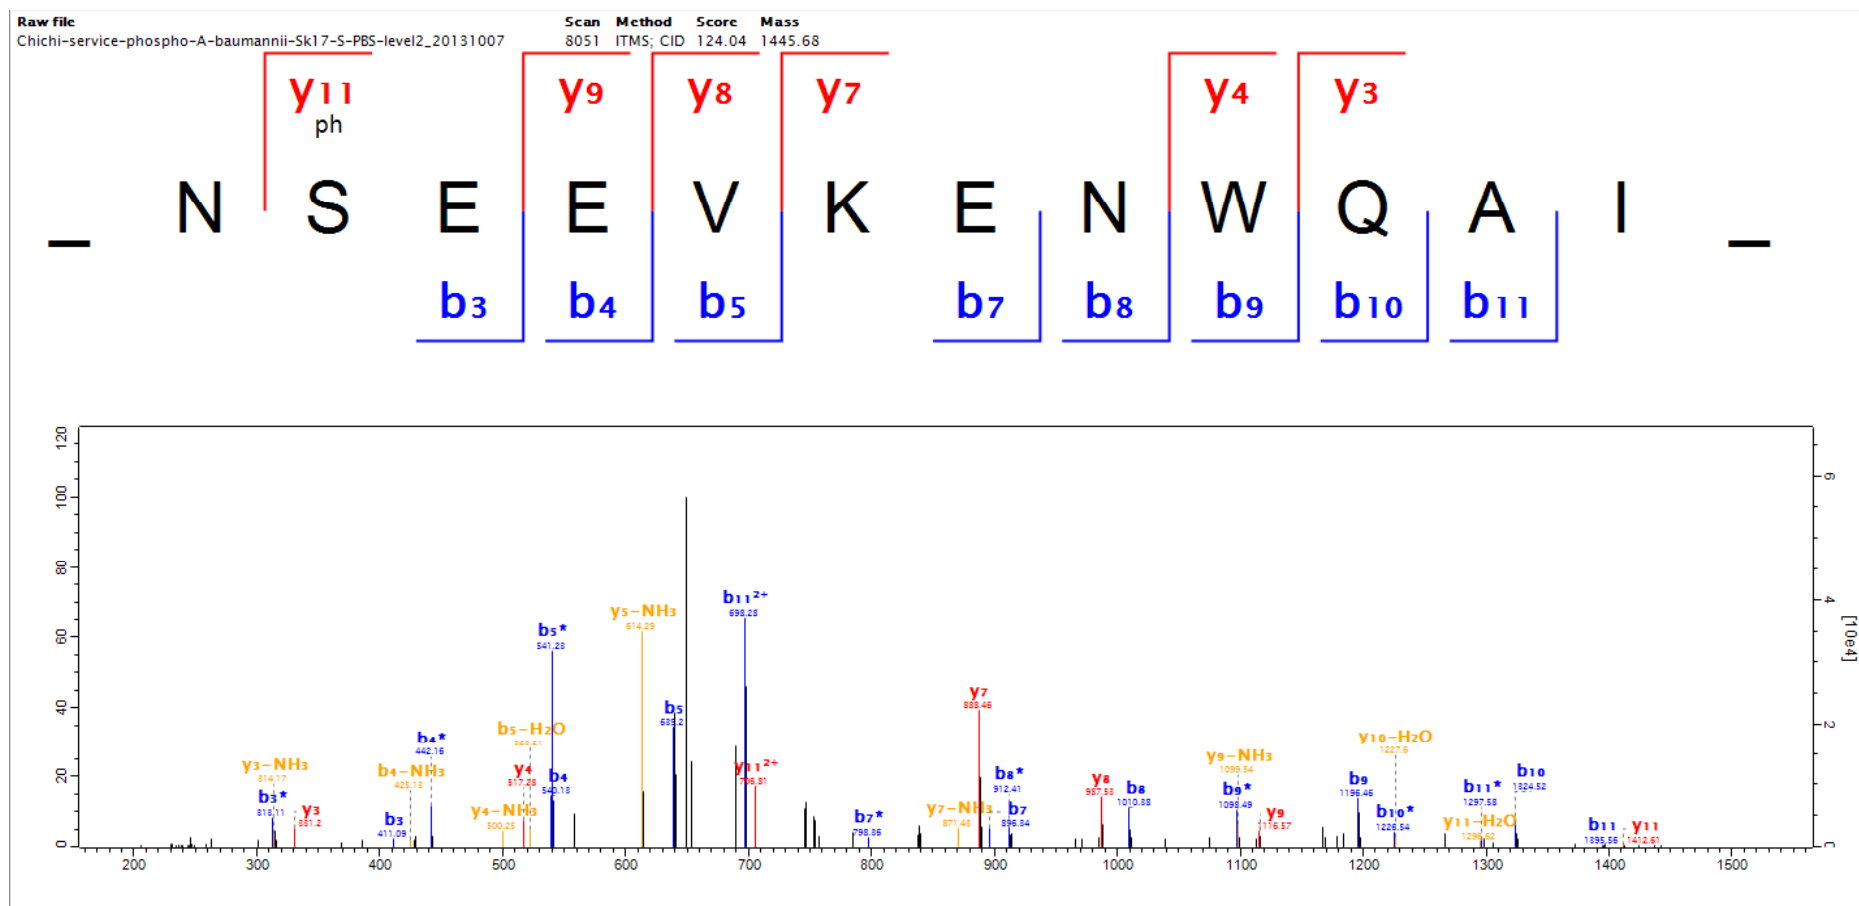

78-2

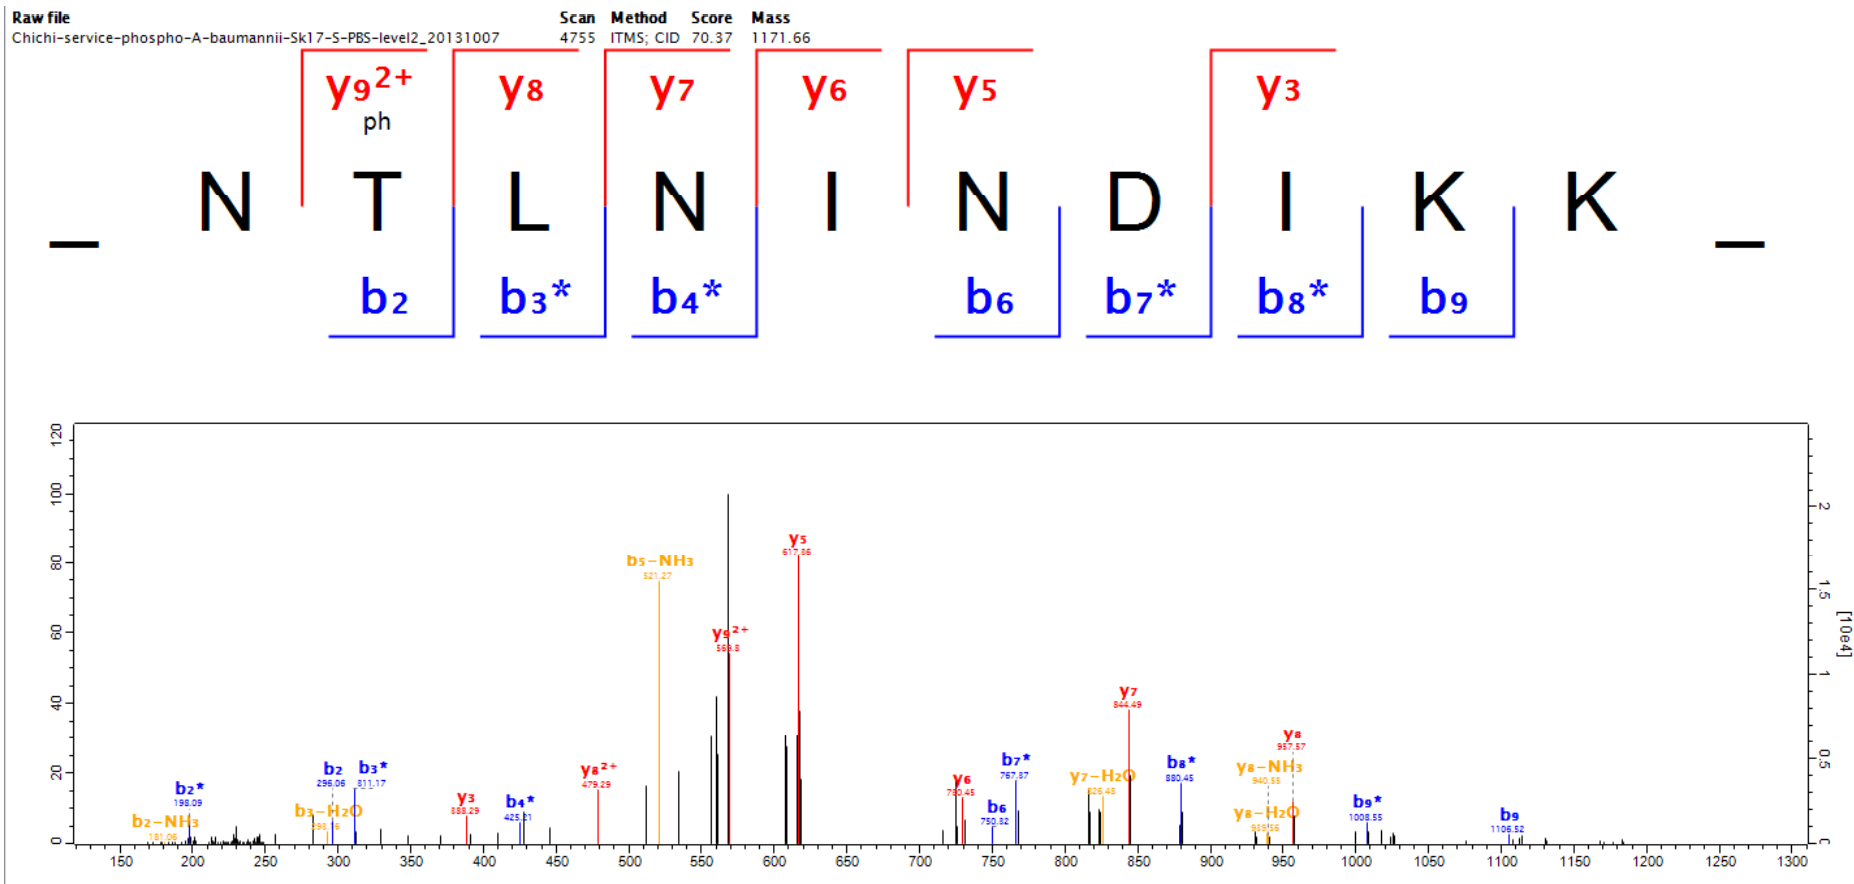

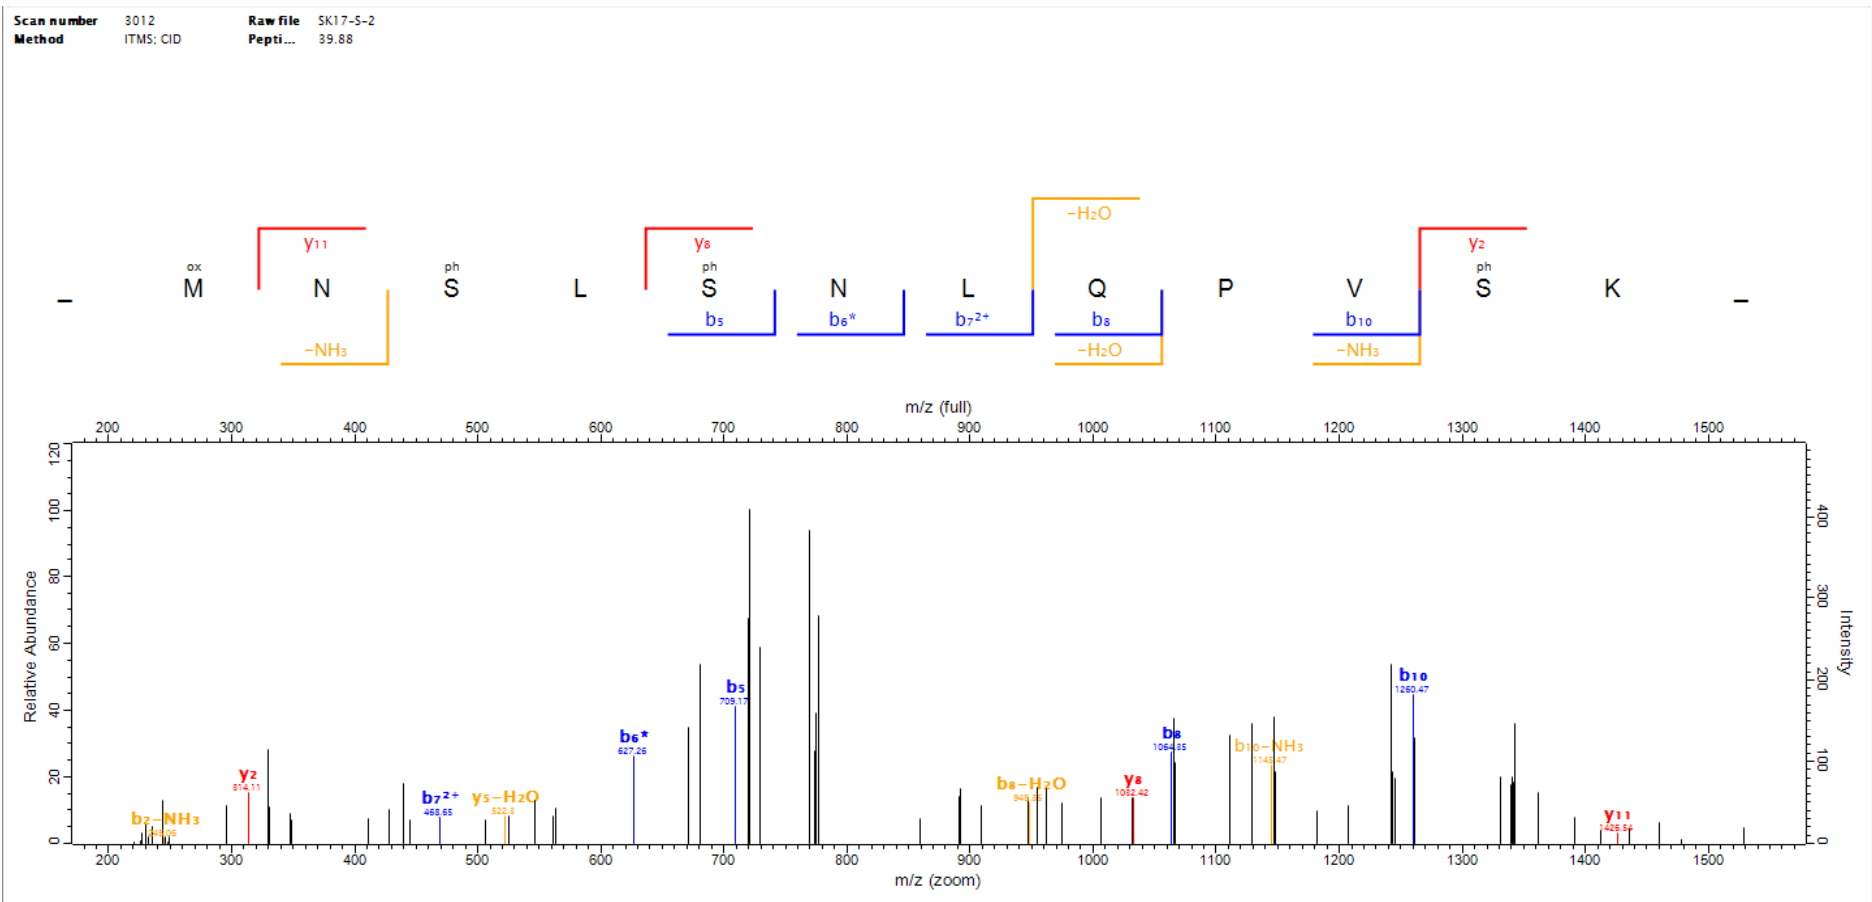

Scan number 5124 Raw file Chichi-service-phospho-A-baumannii-Sk17-5-EtOH-level2\_20131007  
Method ITMS; CID Pepti... 34.15

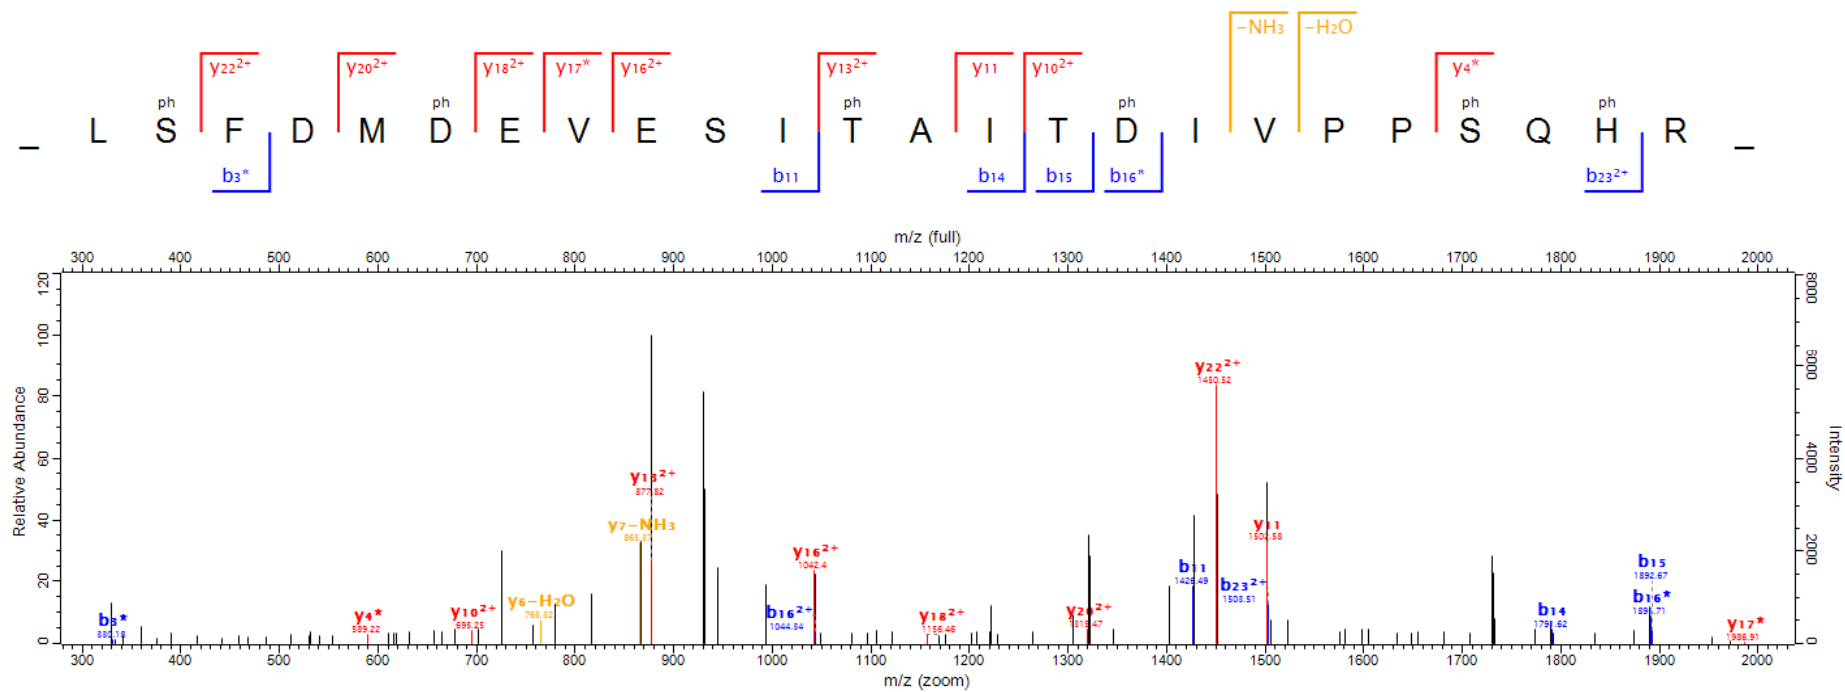



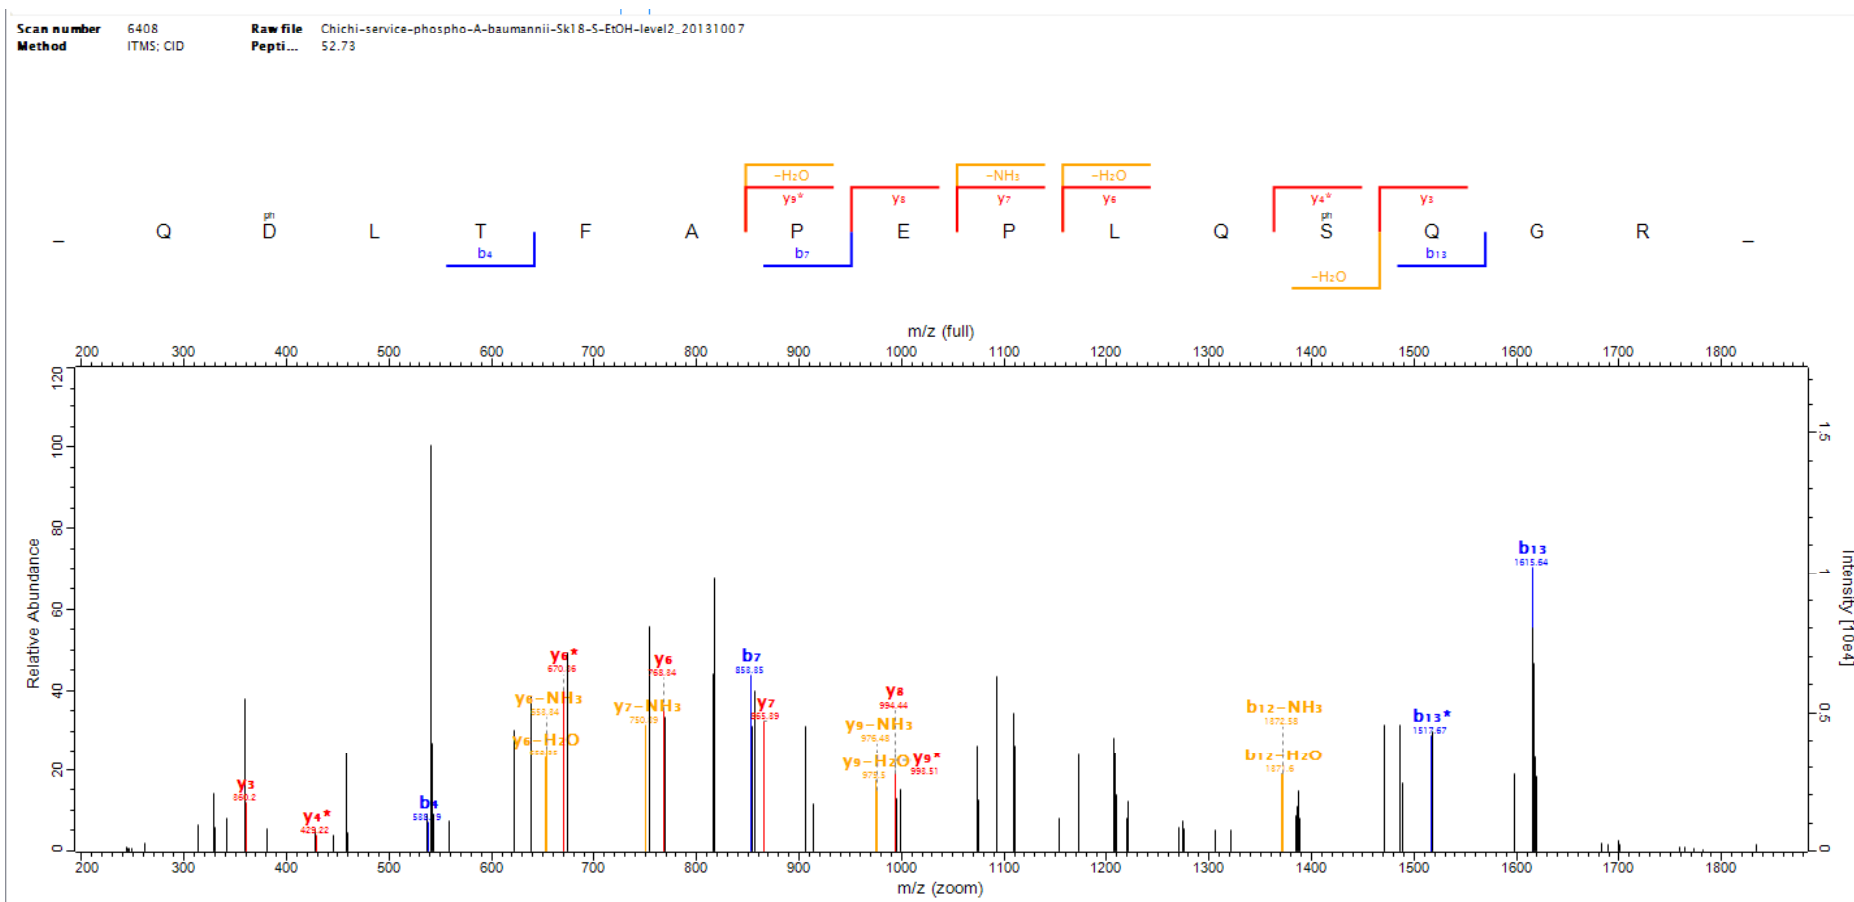

Scan number 3369 Raw file Chichi-service-phospho-A-baumannii-Sk17-5-EtOH-level1\_20131023  
 Method ITMS: CID Pepti... 108.45

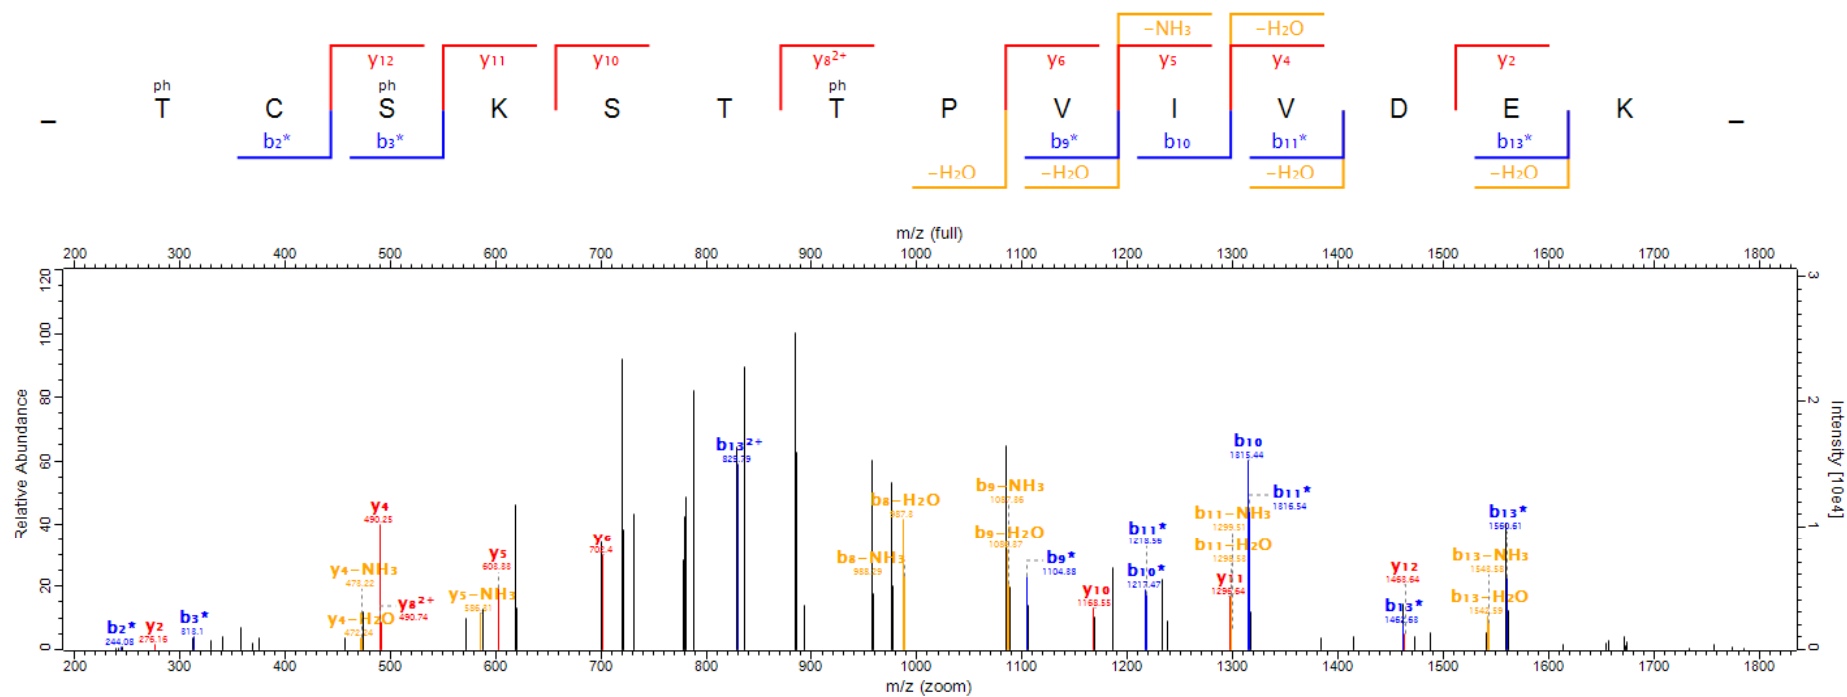

Scan number 6370 Raw file Chichi-service-phospho-A-baumannii-Sk17-S-EtOH-level2\_20131007  
 Method ITMS: CID Pepti... 67.66

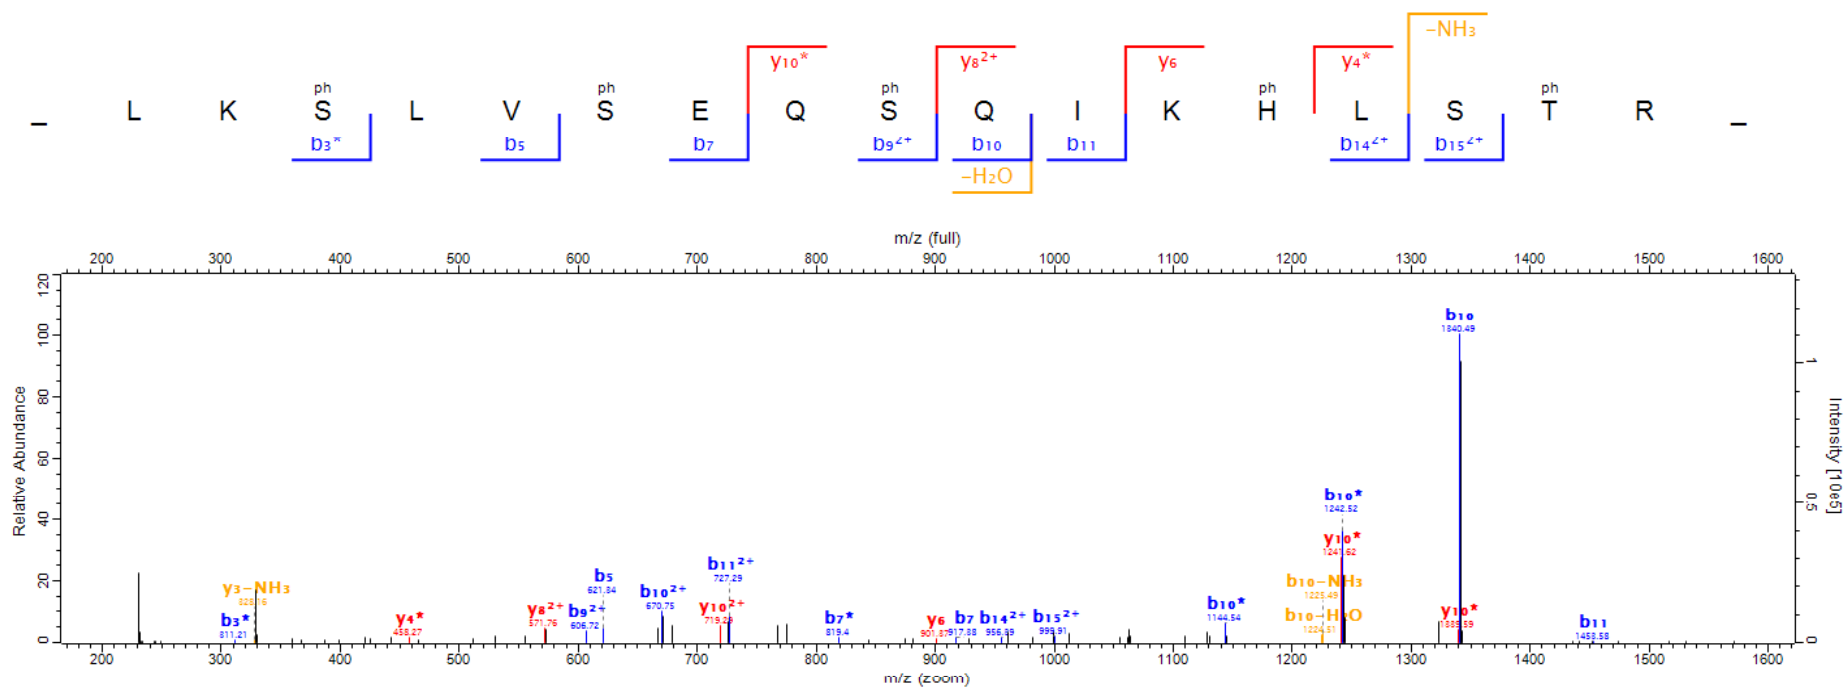

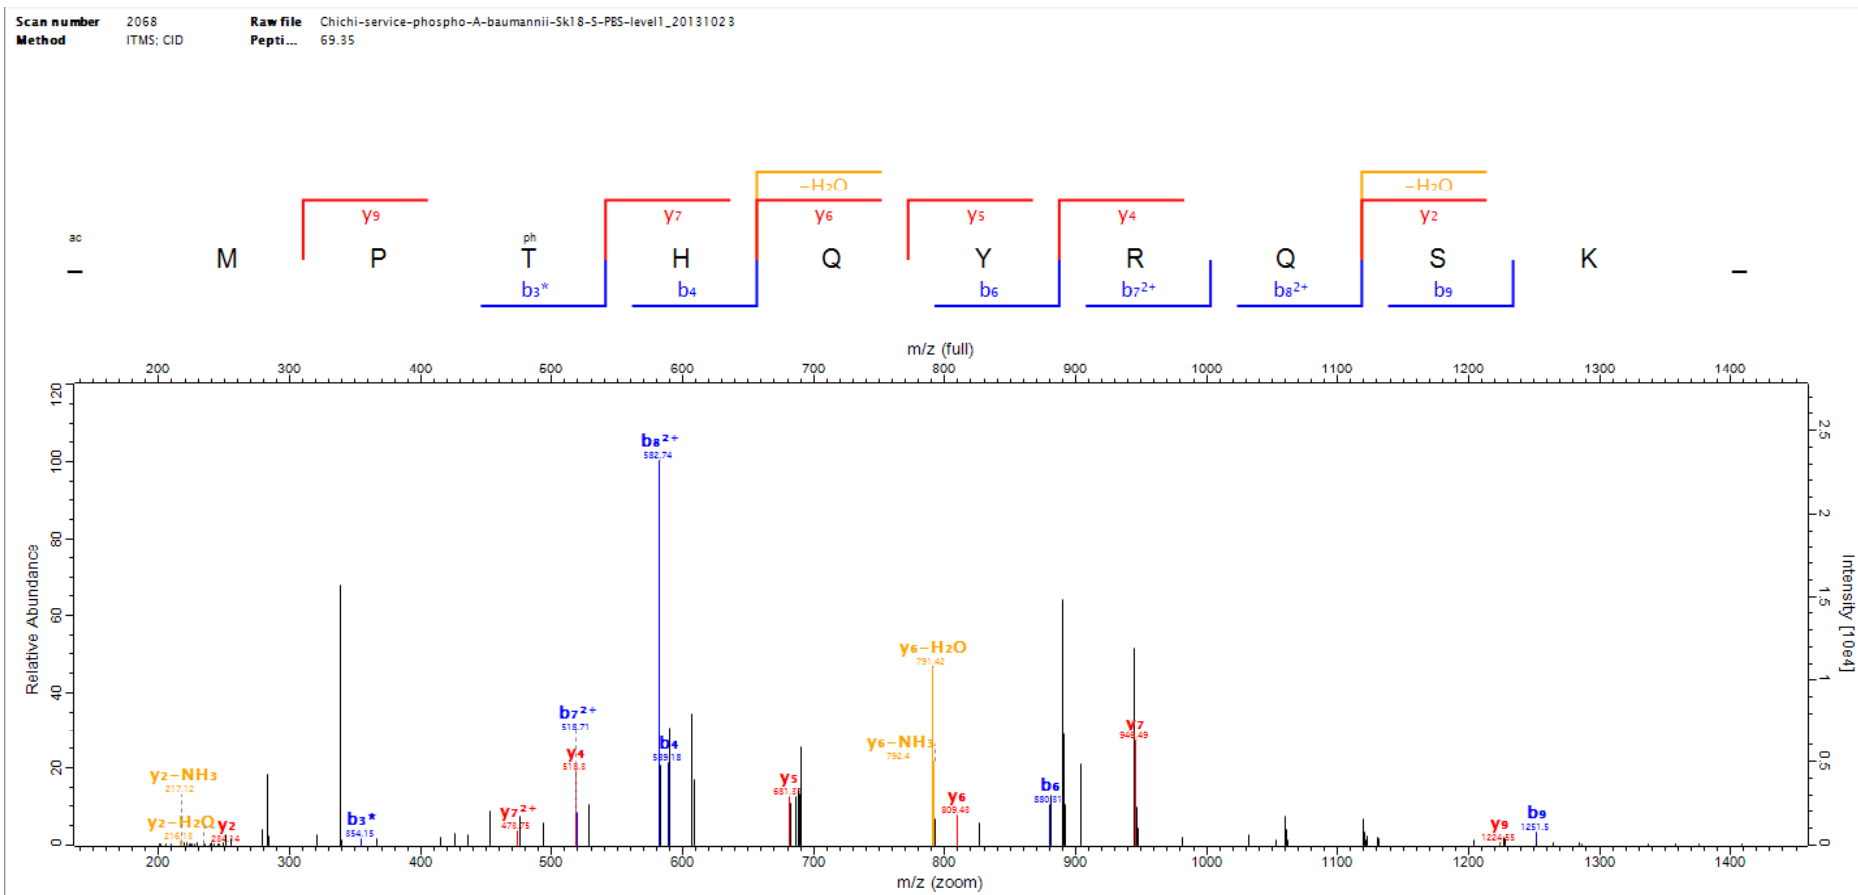

Raw file Scan Method Score Mass  
SK175-3 1944 ITMS; CID 64.22 1128.54

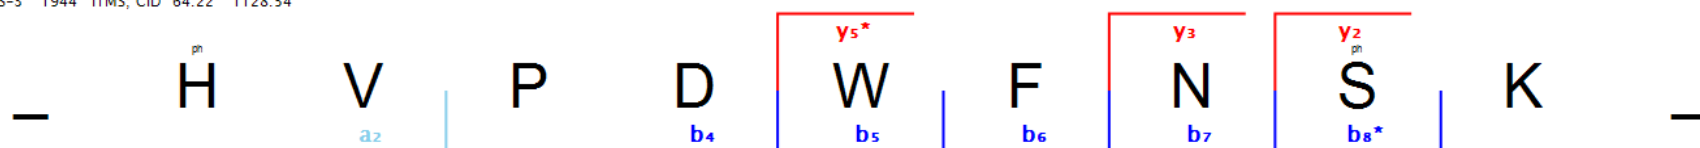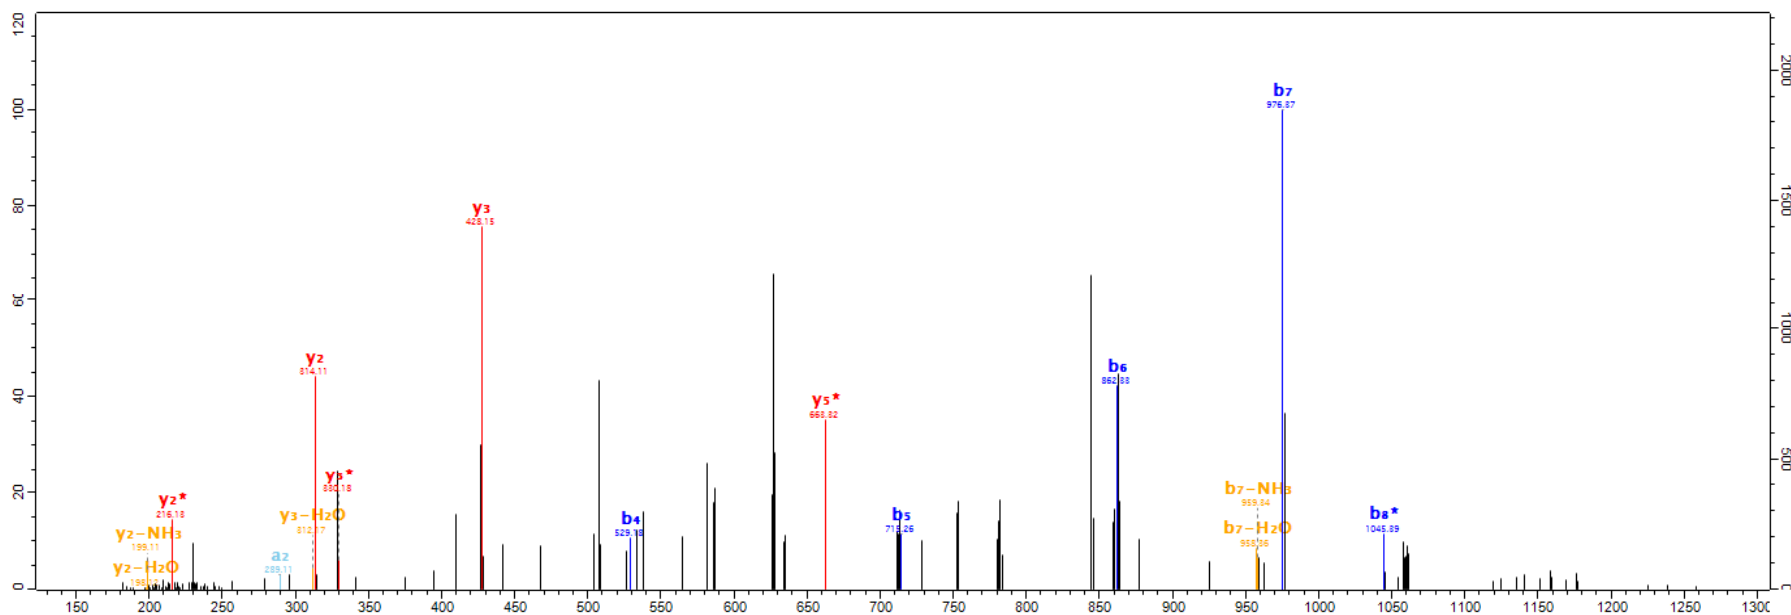

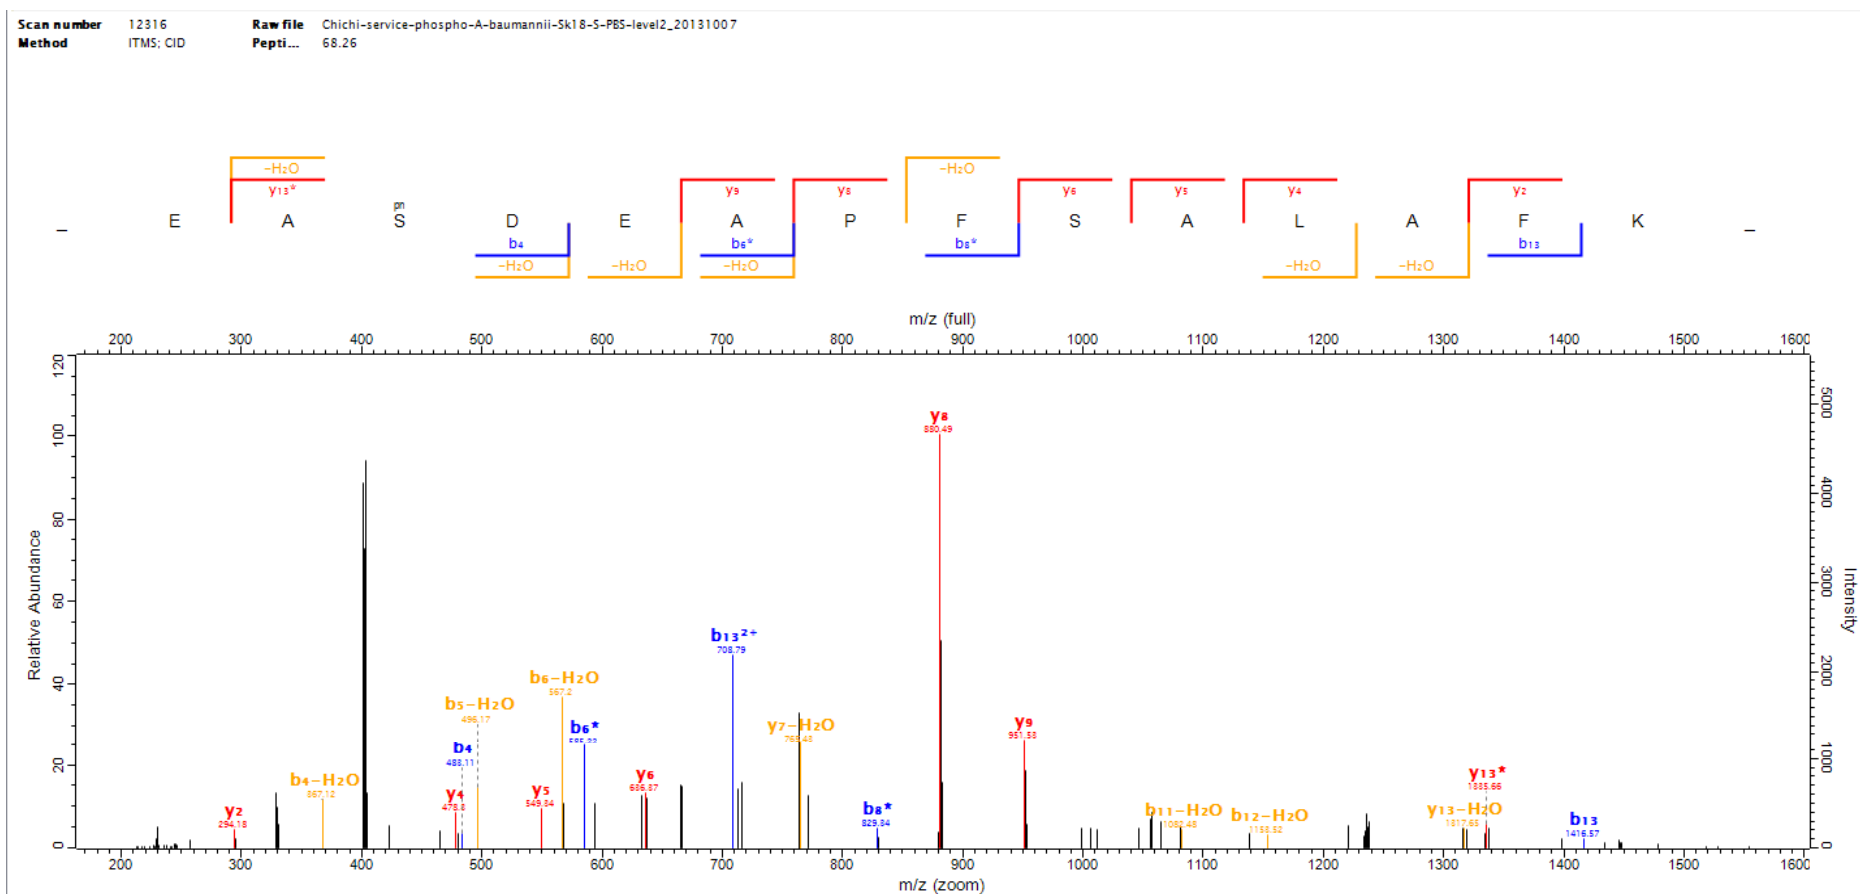

Scan number 10494 Raw file Chichi-service-phospho-A-baumannii-Sk17-5-EtOH-level1\_20131023  
 Method ITMS: CID Pepti... 42.64

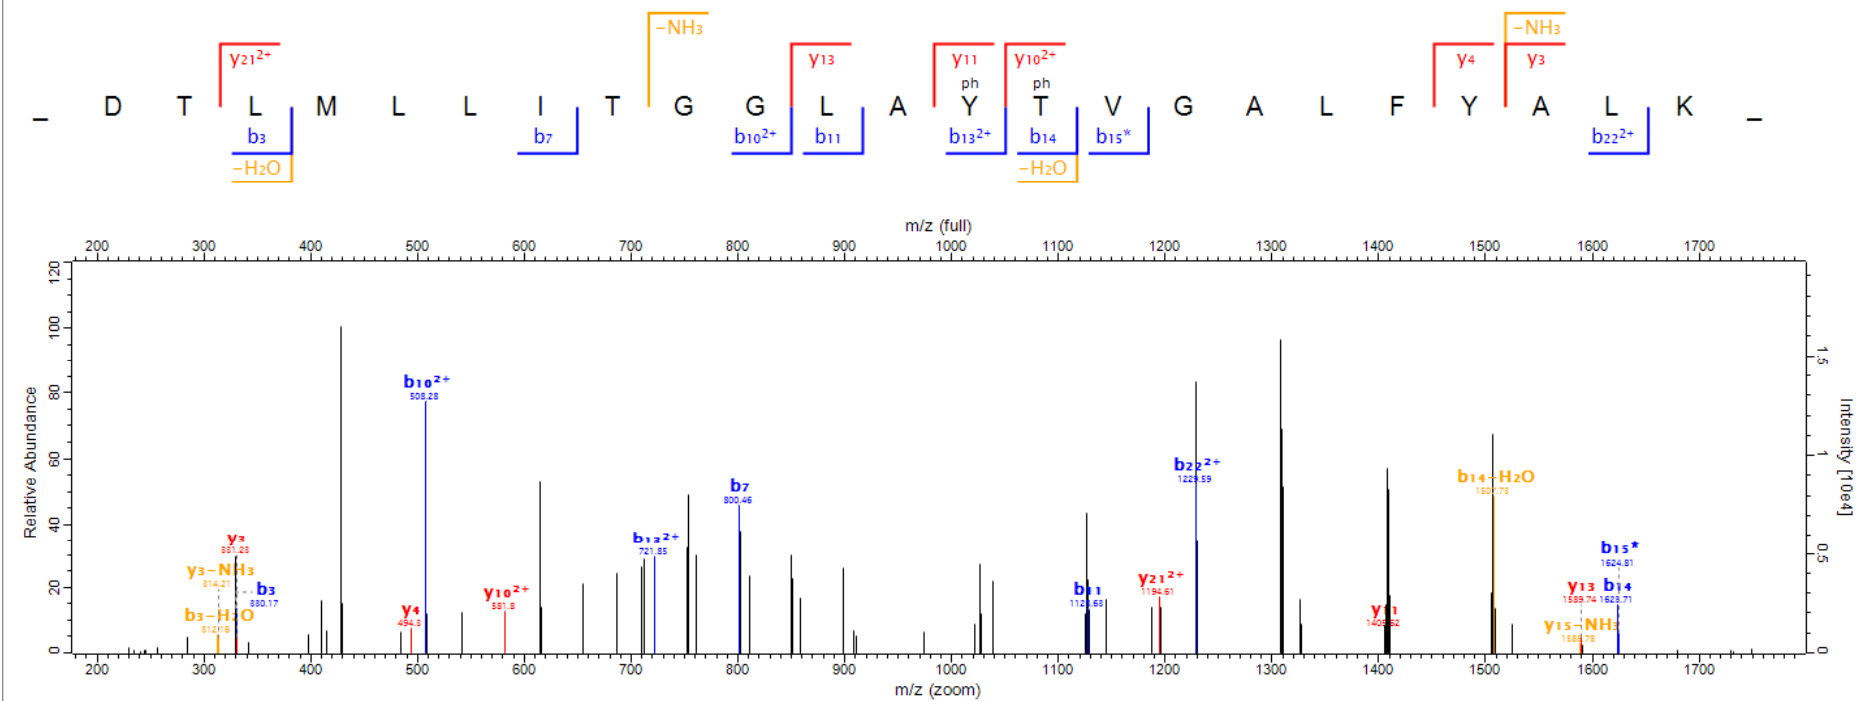

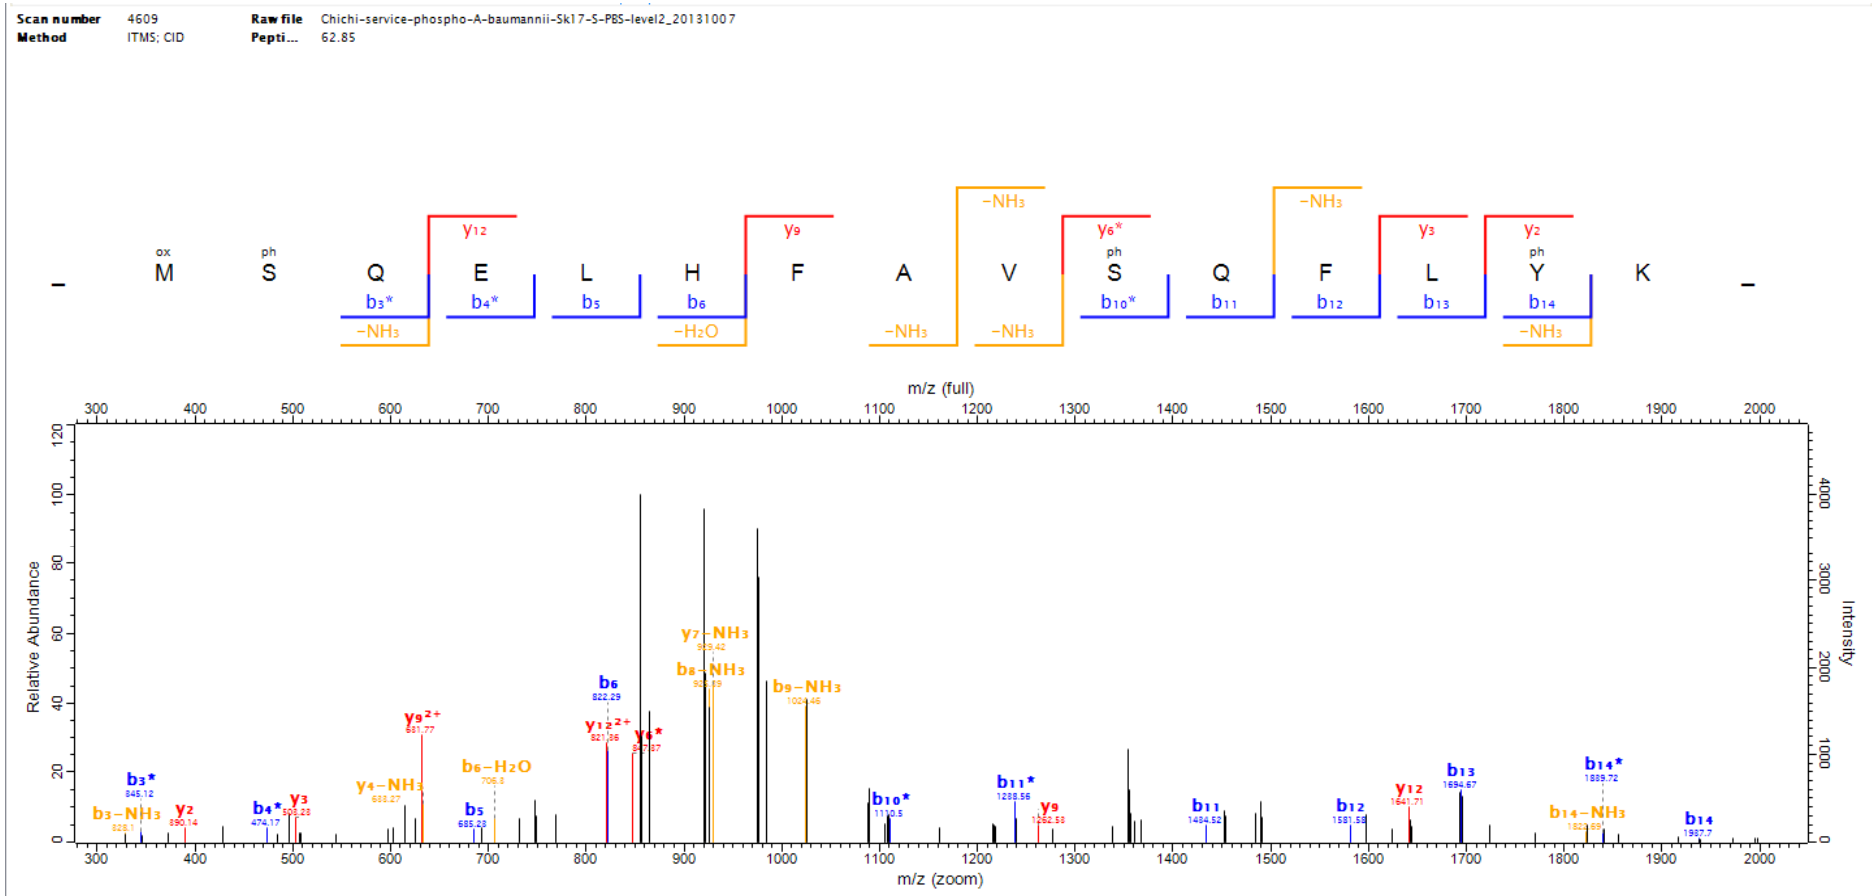



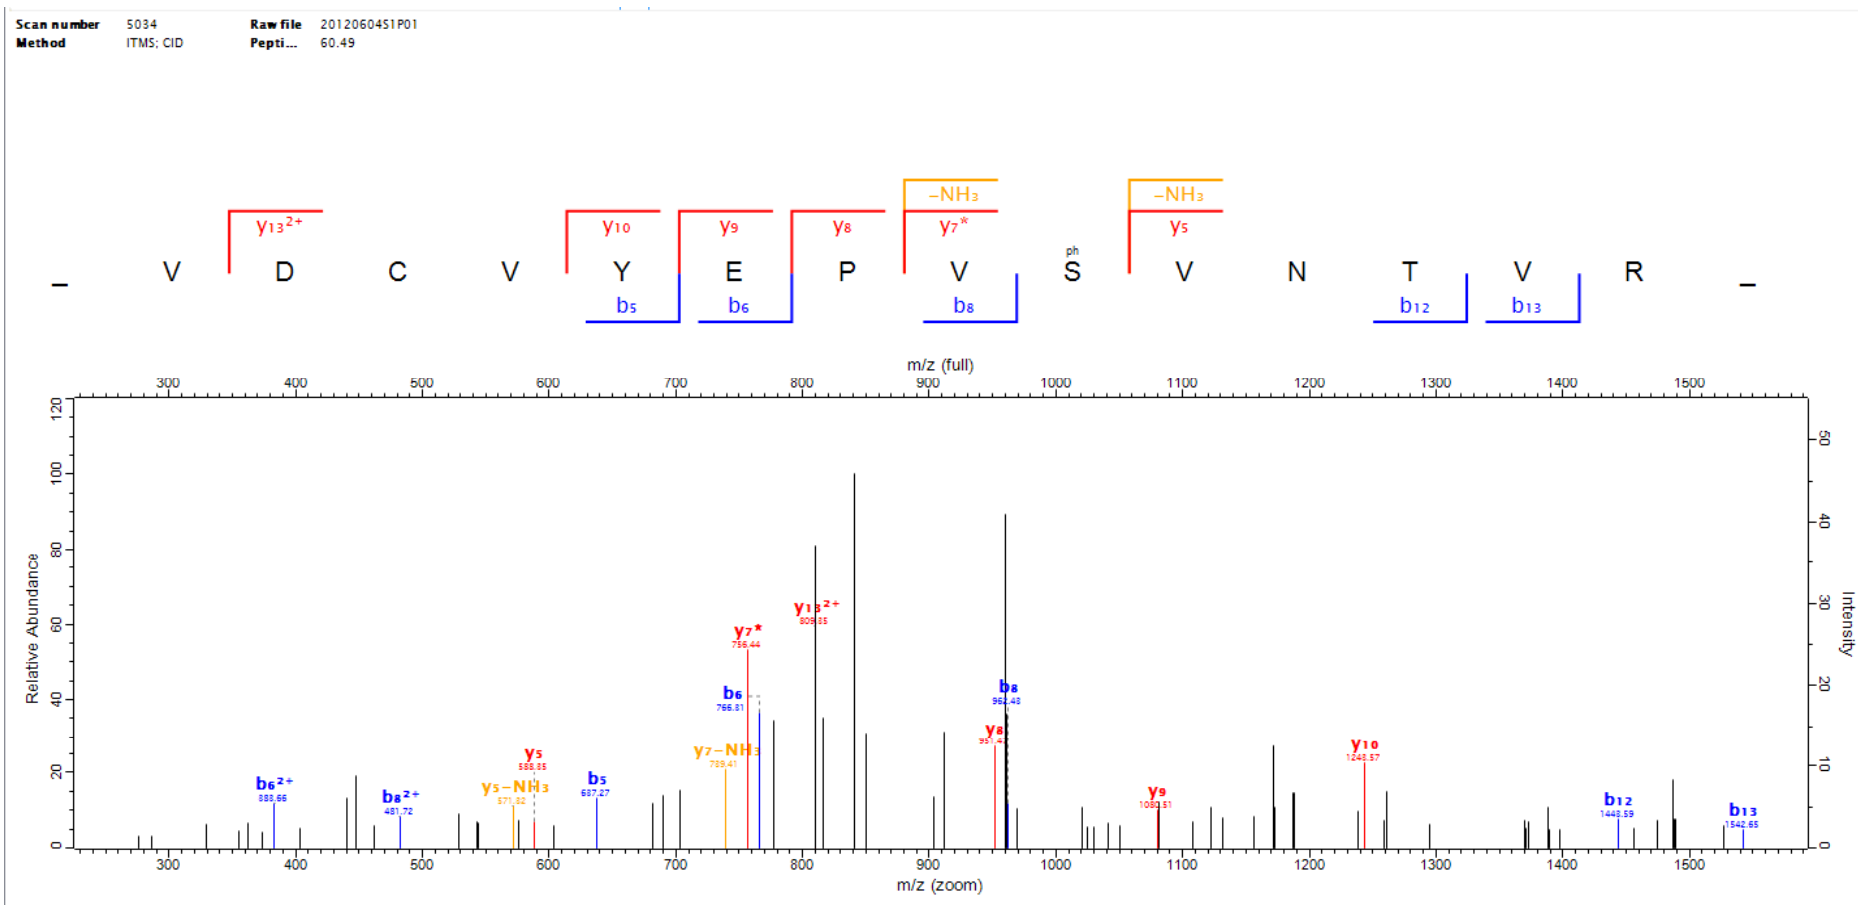

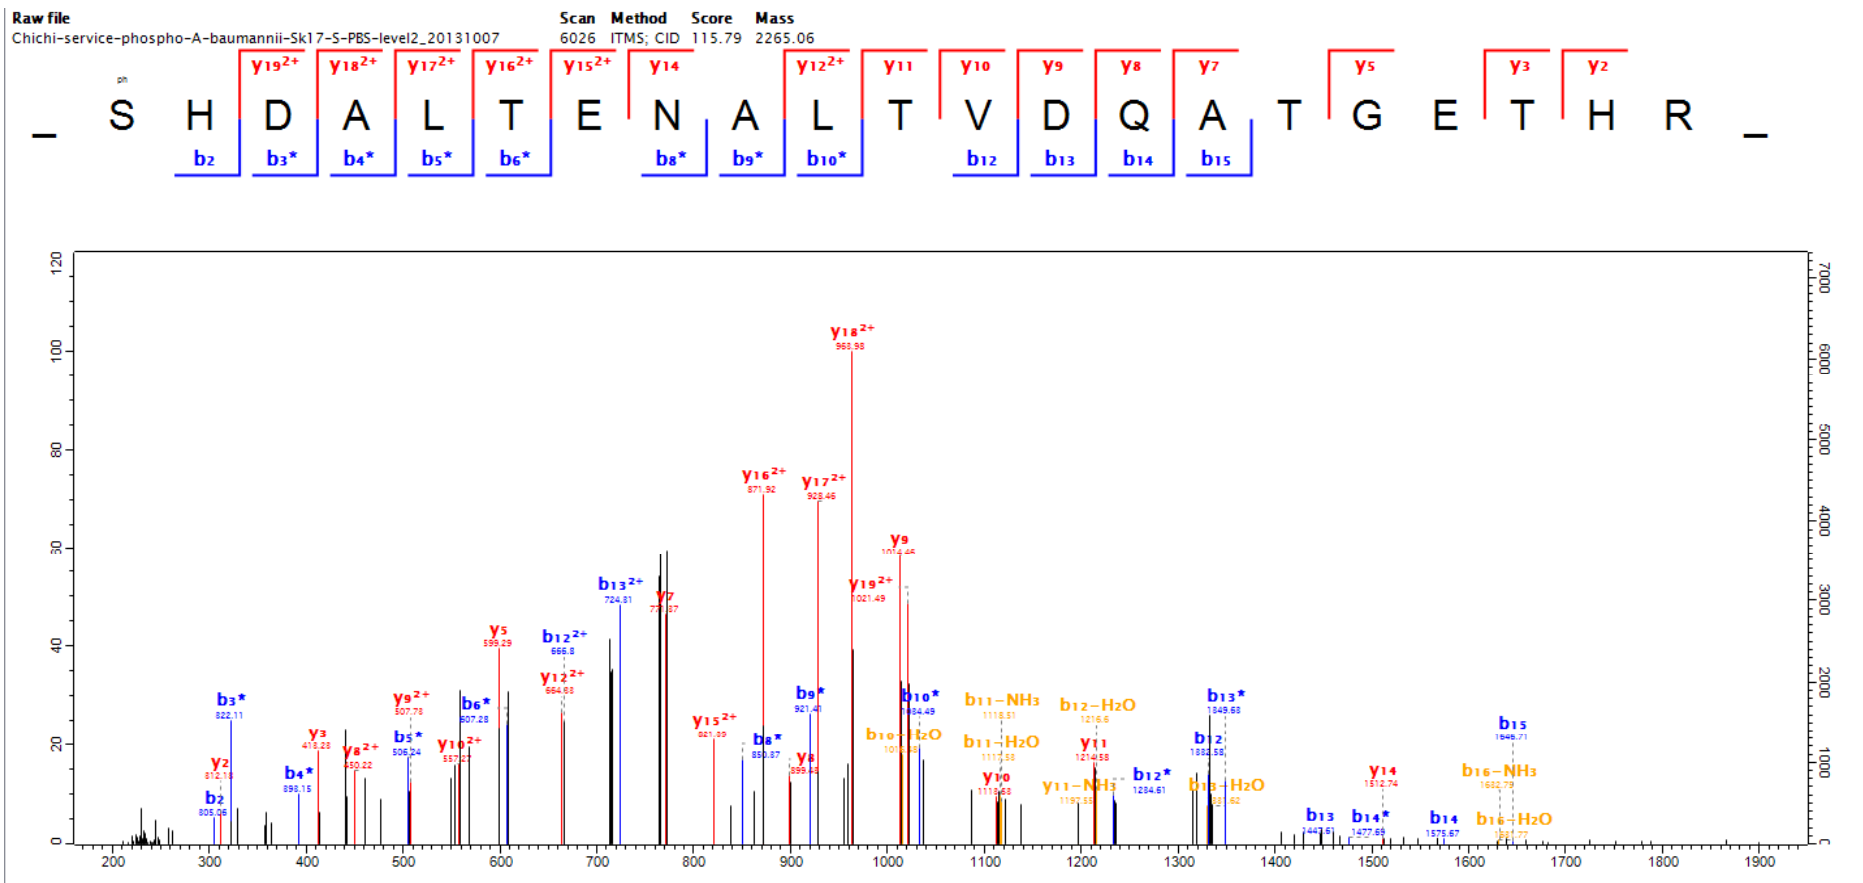

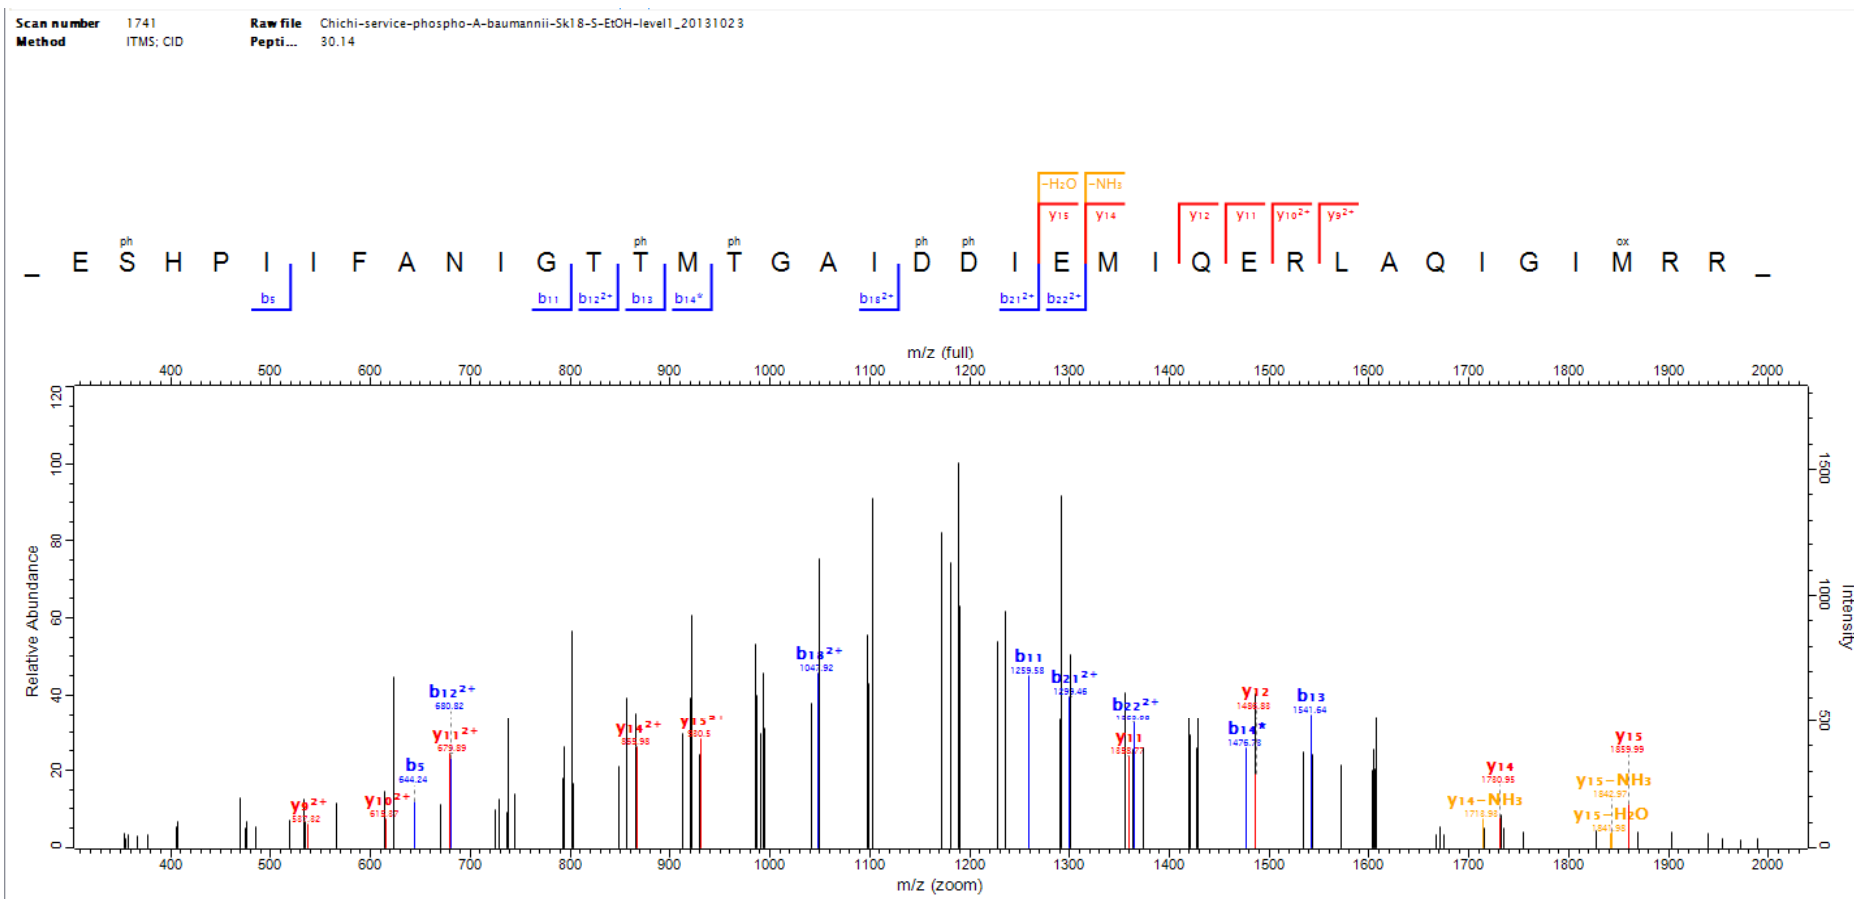

Scan number 6825 Raw file Chichi-service-phospho-A-baumannii-Sk17-5-EtOH-level2\_20131007  
 Method ITMS; CID Pepti... 65.95

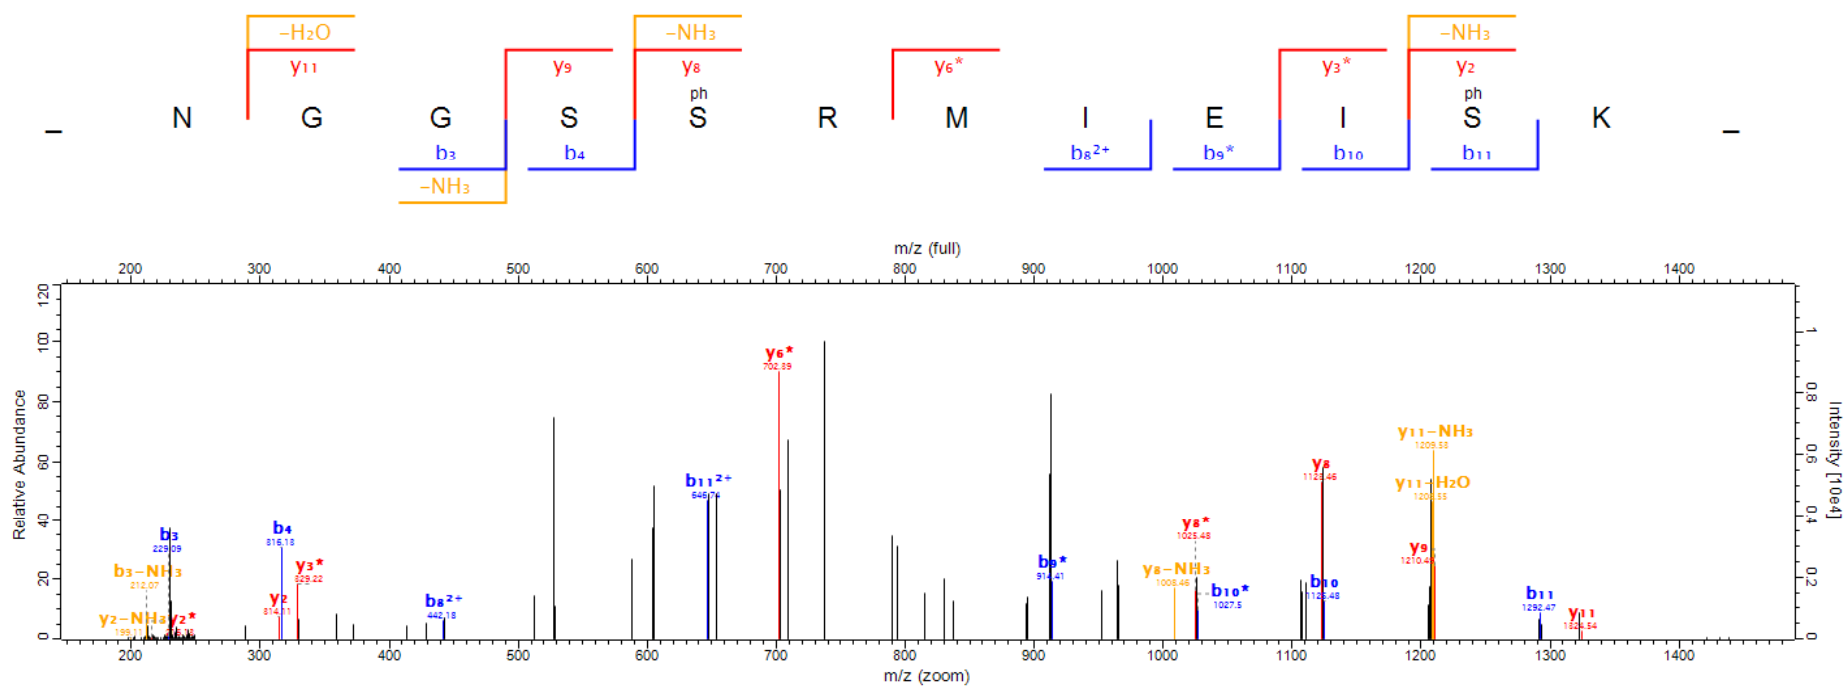

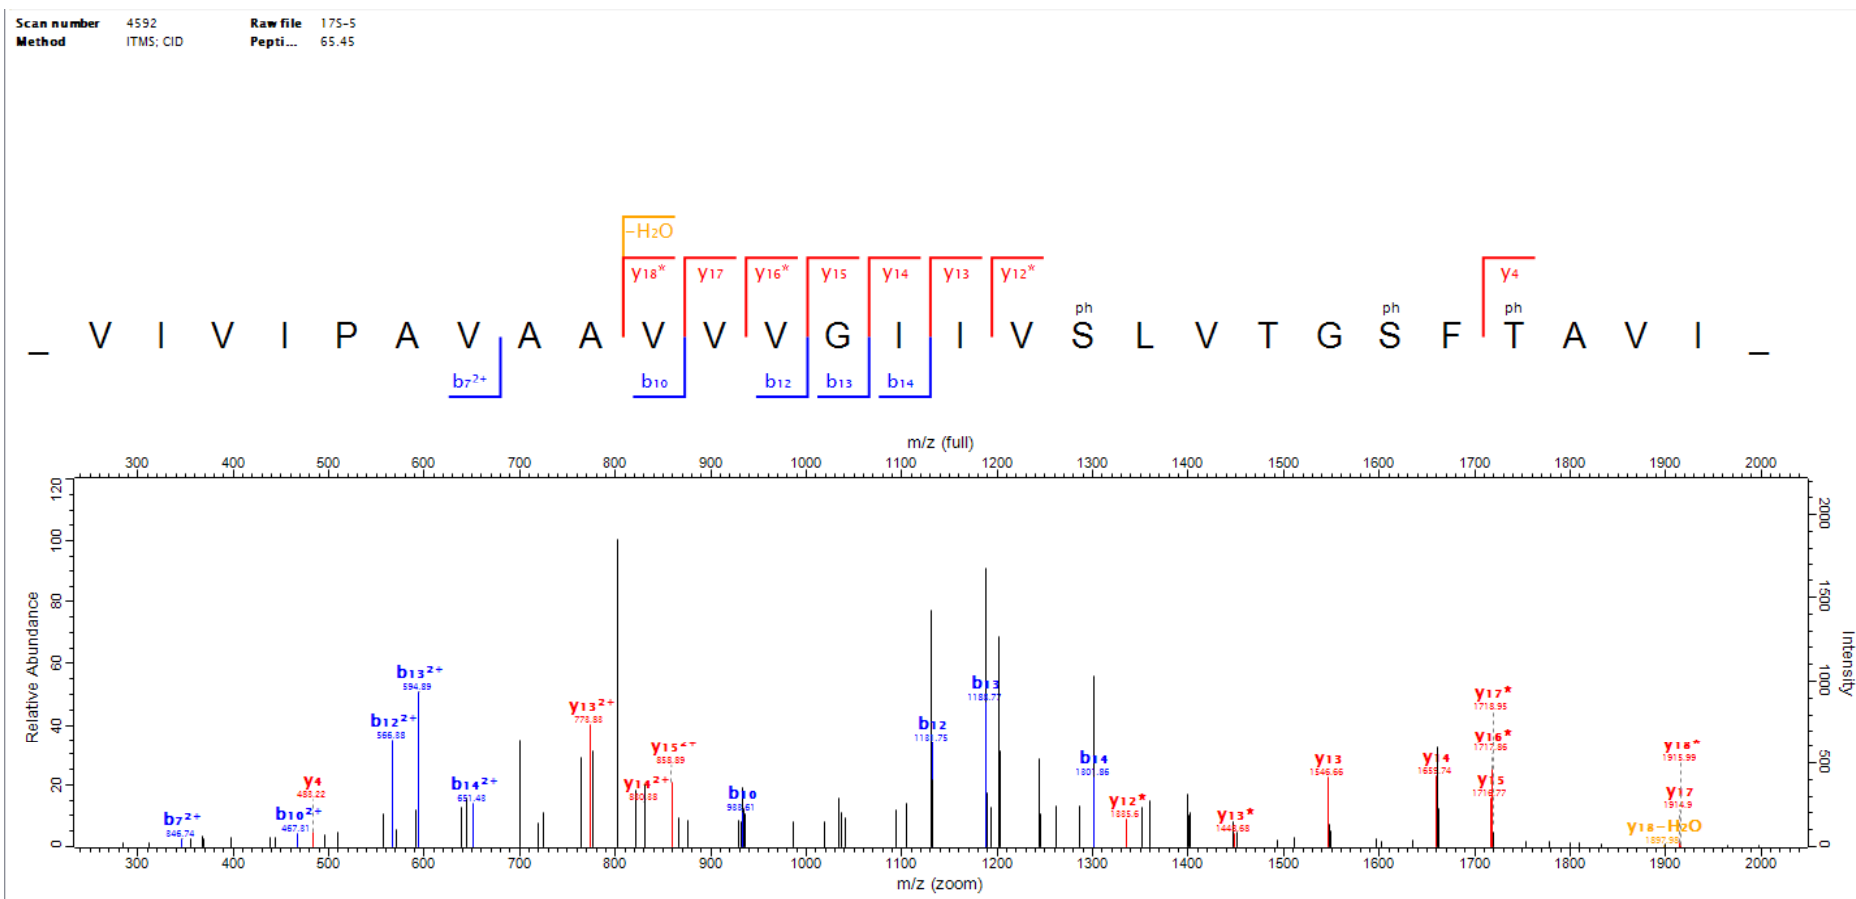

Scan number 3324 Raw file Chichi-service-phospho-A-baumannii-Sk18-5-PBS-level2\_20131007  
 Method ITMS: CID Pepti... 36.29

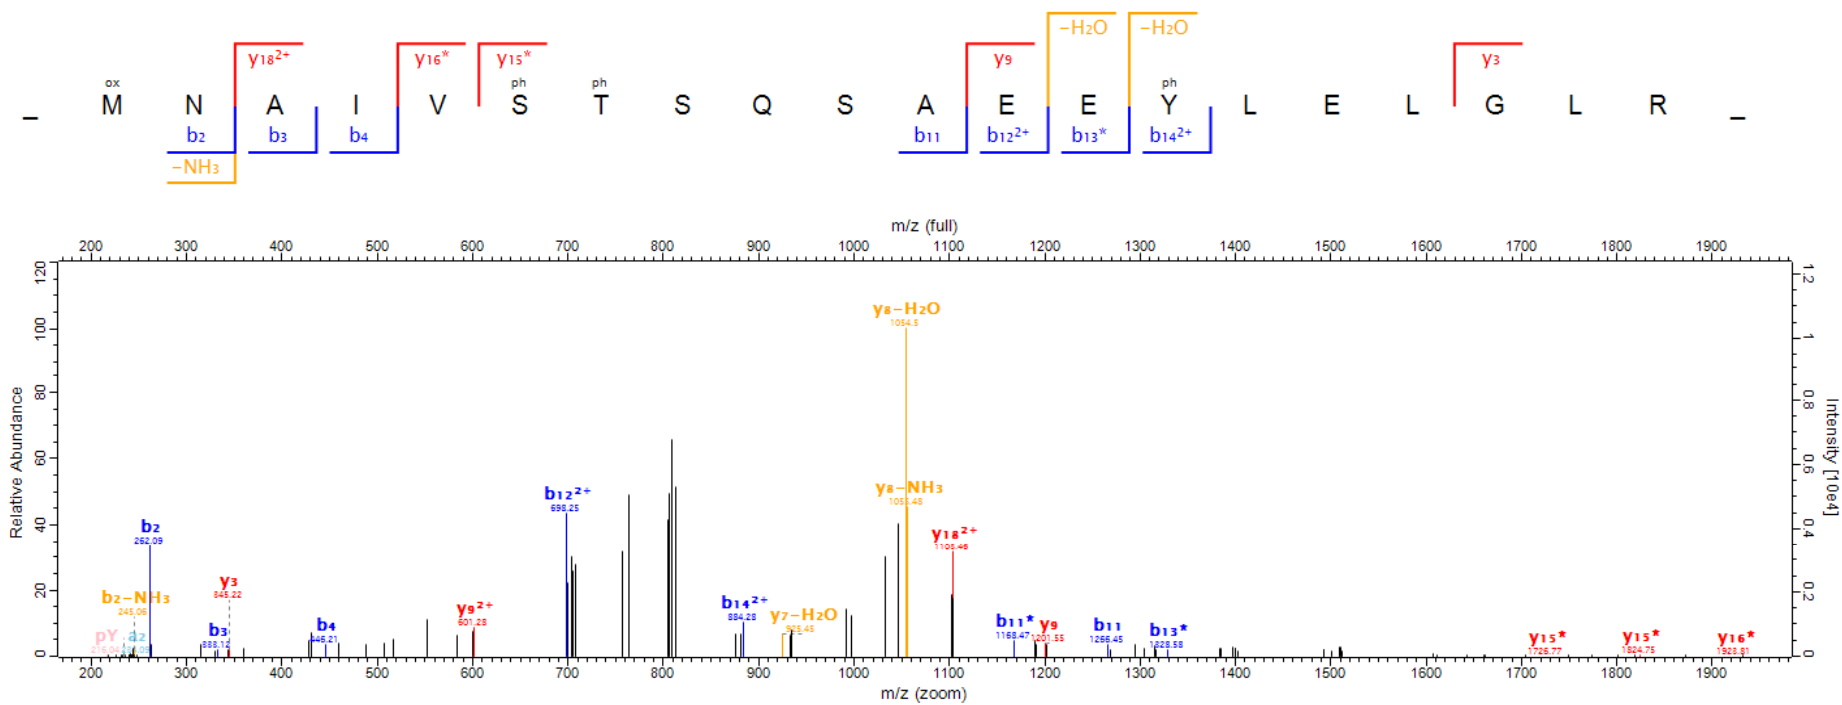

Scan number 13003 Raw file Chichi-service-phospho-A-baumannii-Sk17-S-EtOH-level1\_20131023  
 Method ITMS: CID Pepti... 39.98

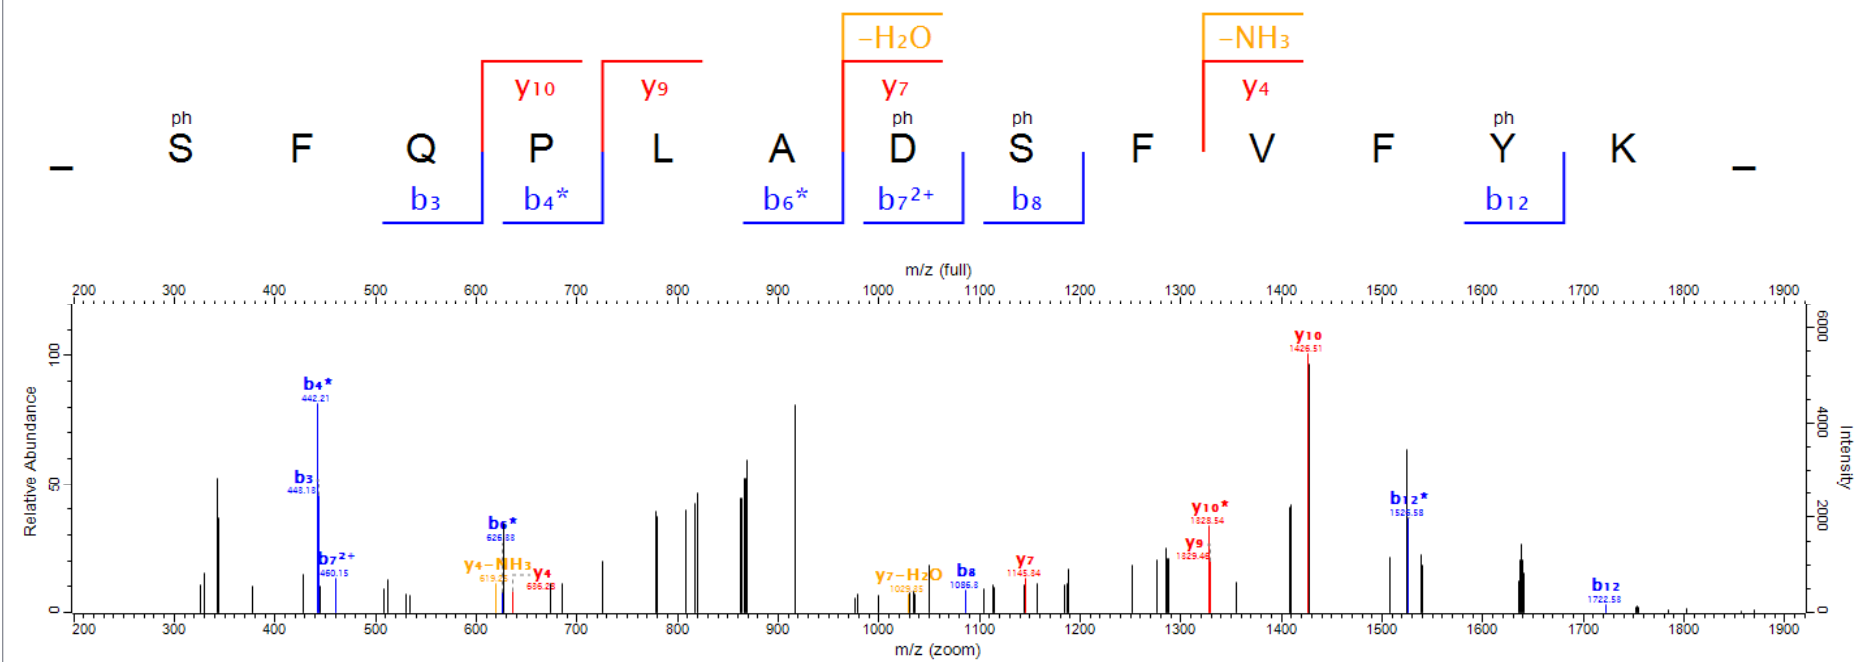

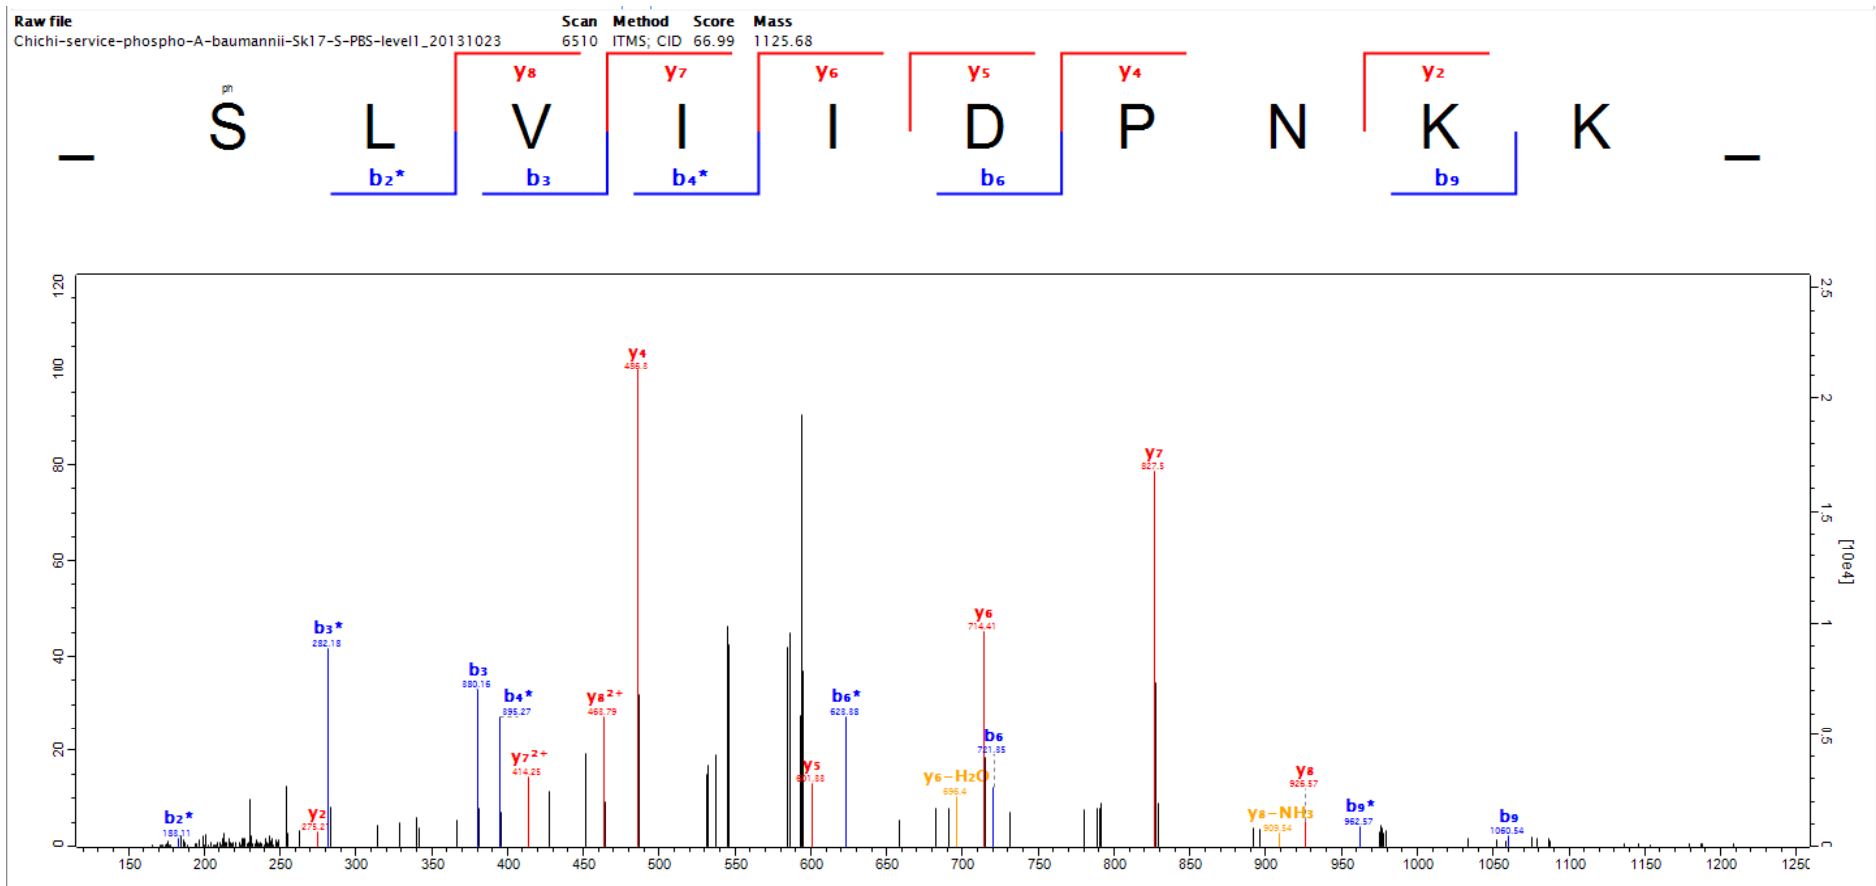



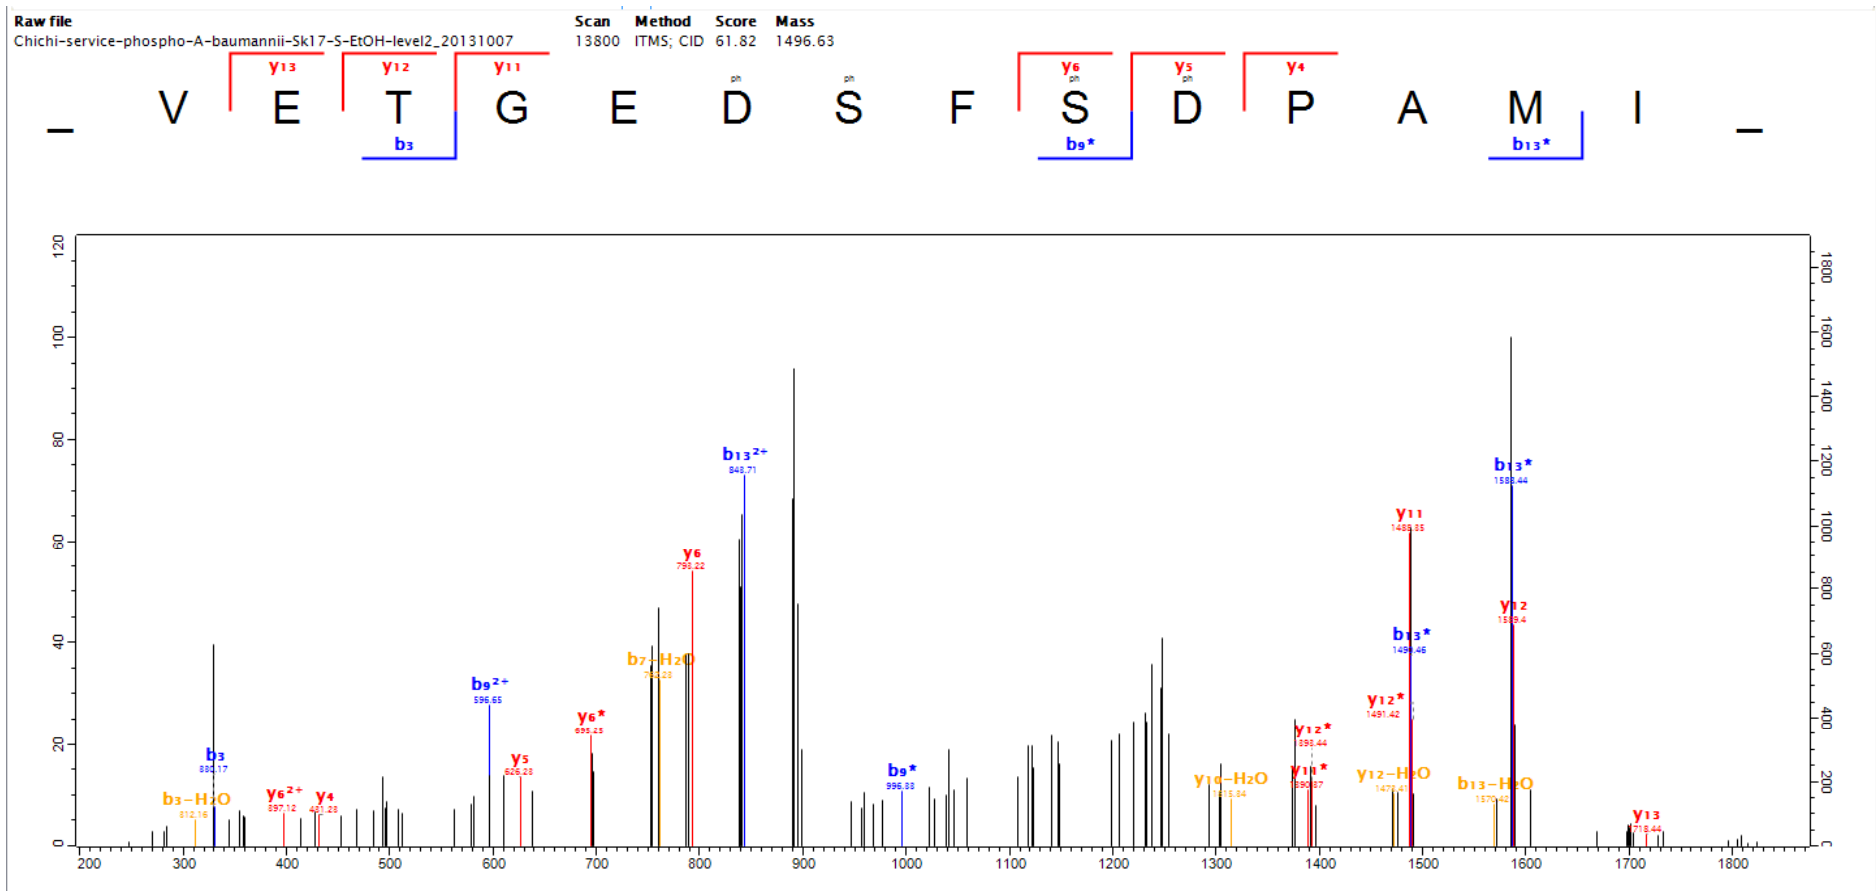

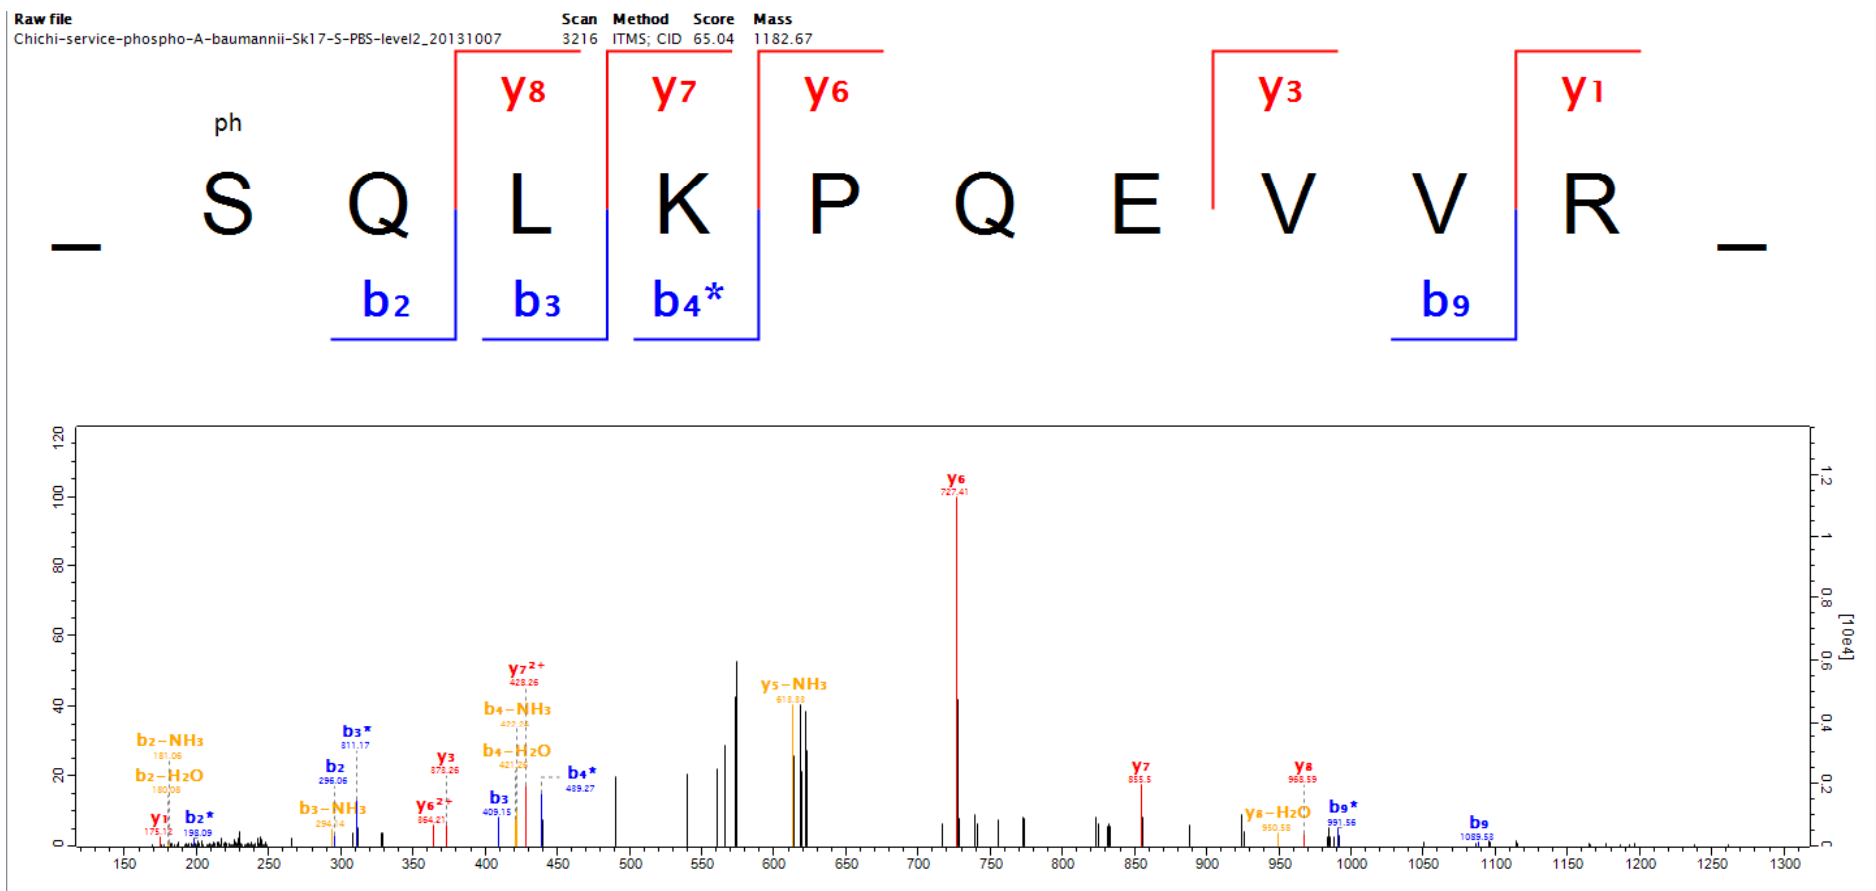

Scan number 6544 Raw file Chichi-service-phospho-A-baumannii-Sk18-5-PBS-level1\_20131023  
 Method ITMS: CID Peptide 45.62

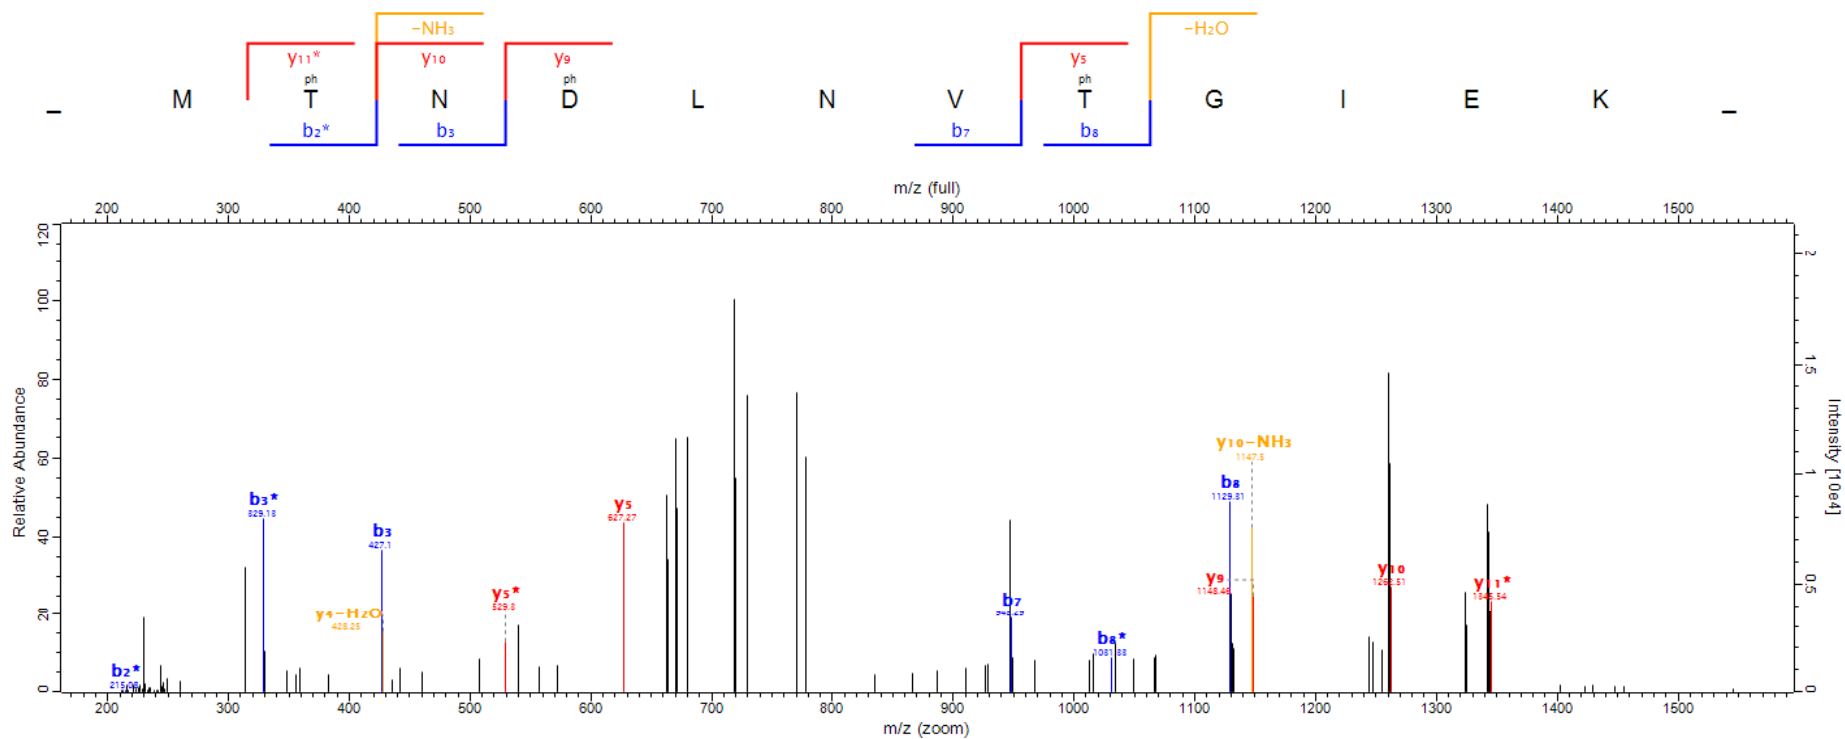

100-1

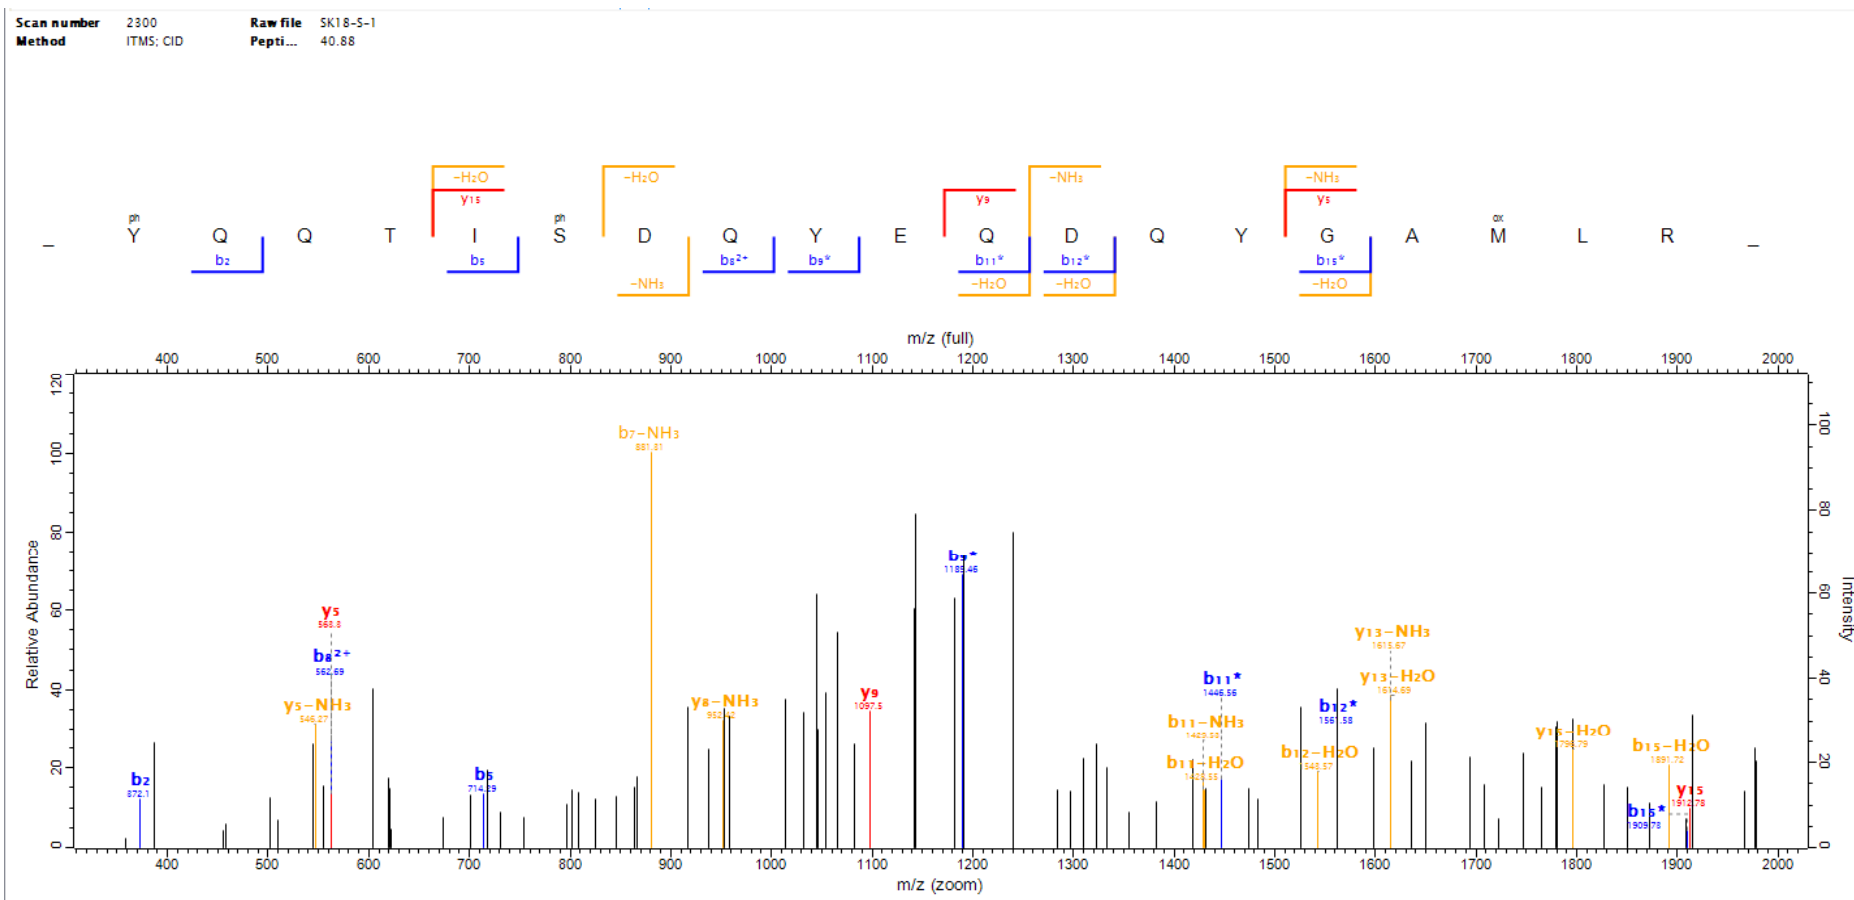

100-2

Scan number 9933 Raw file Chichi-service-phospho-A-baumannii-Sk17-5-EtOH-level1\_20131023  
Method ITMS: CID Pepti... 46.54

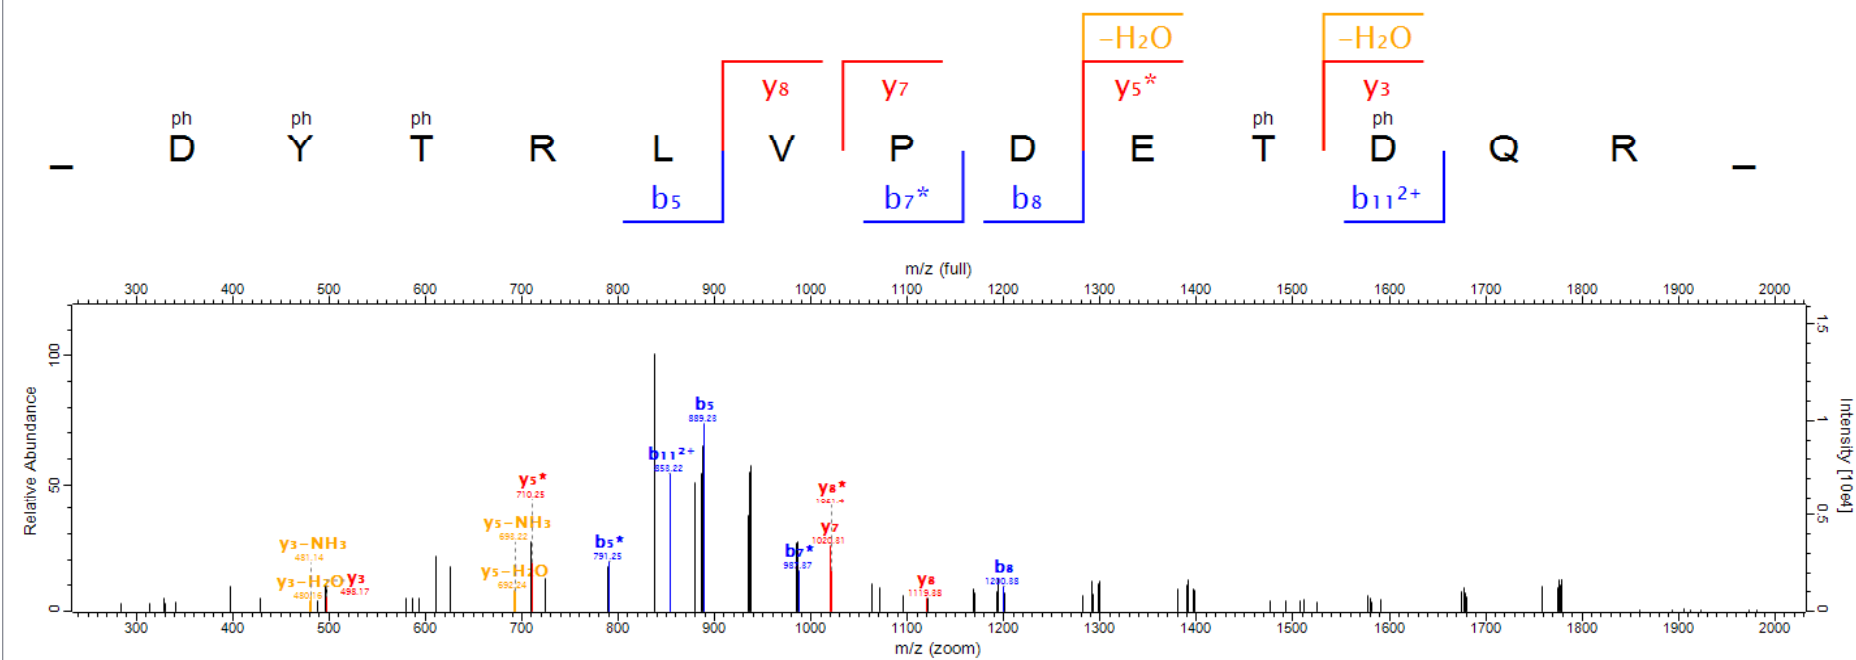

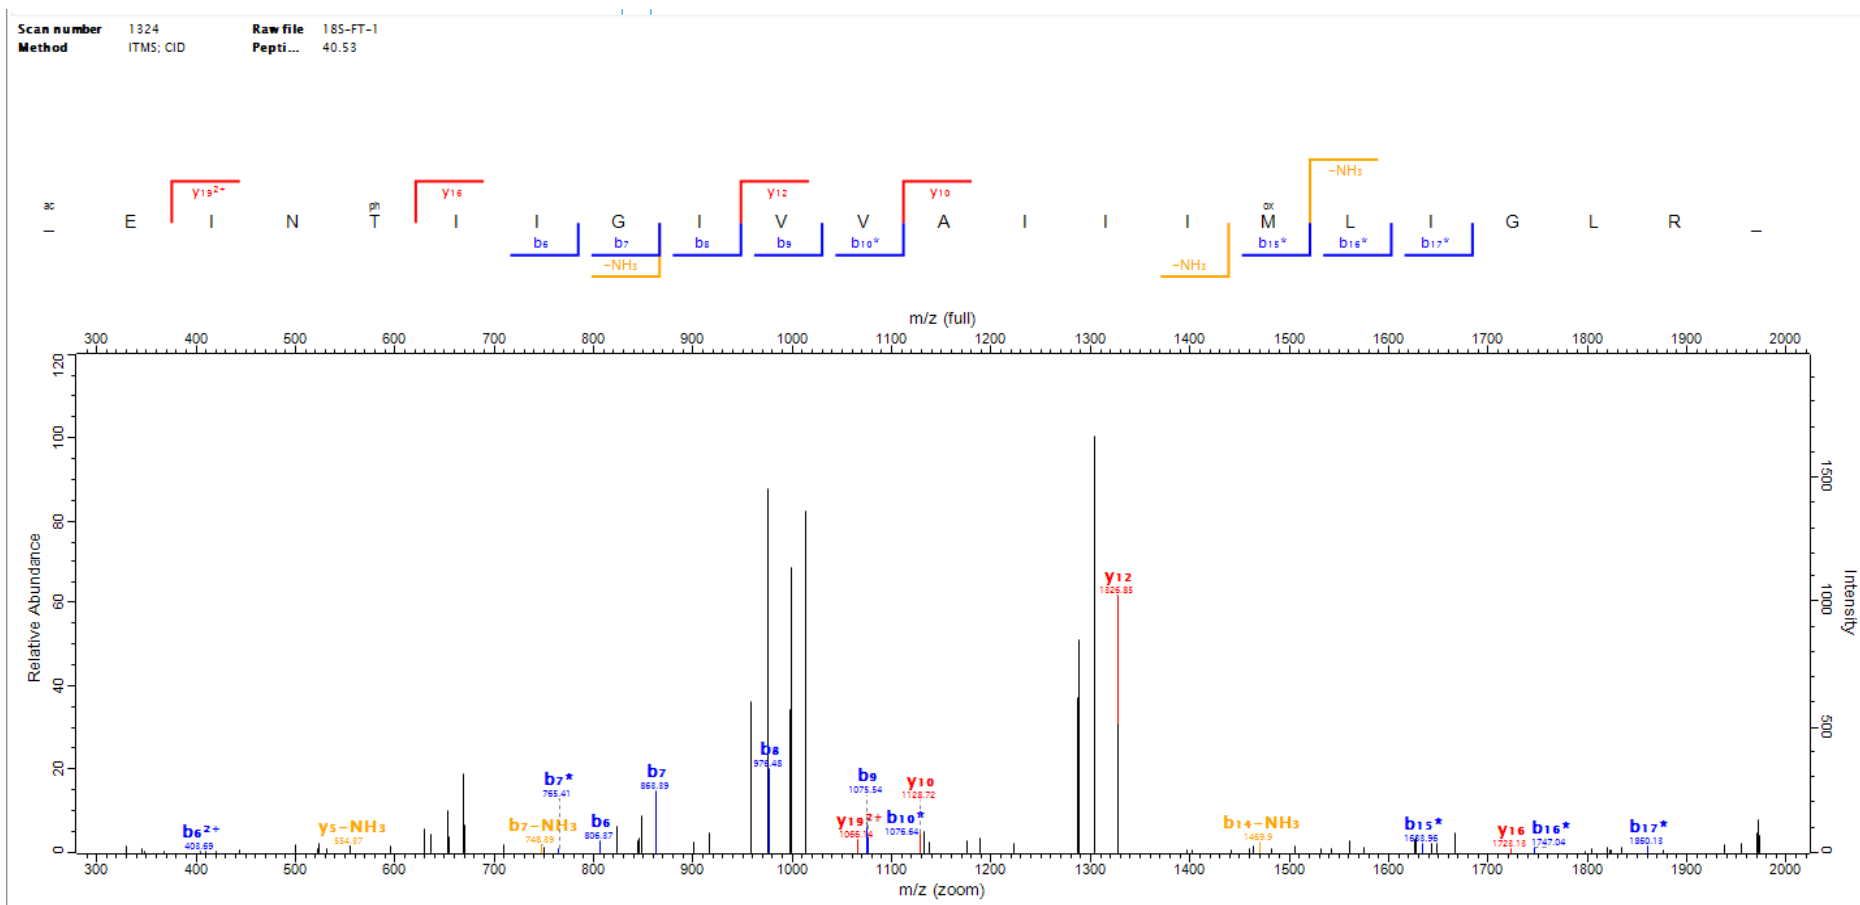

102-1

Raw file Scan Method Score Mass  
20120521S302 3821 ITMS; CID 17.69 1437.67

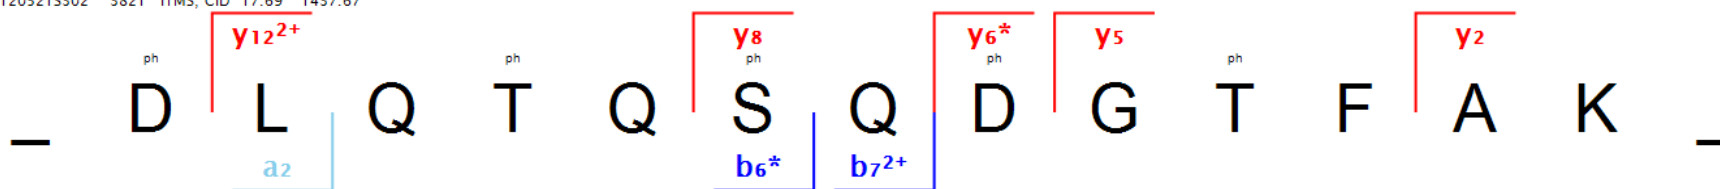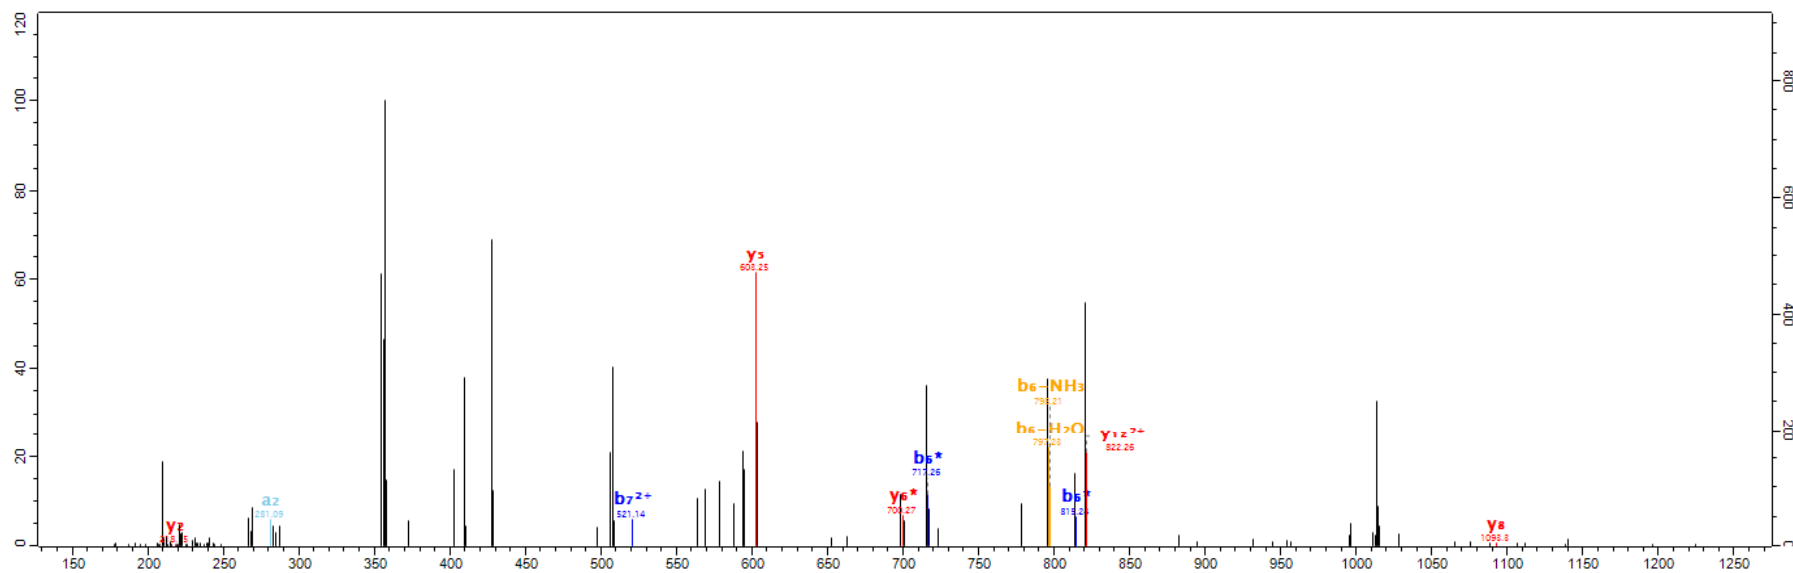

102-2

Scan number 3712 Raw file Chichi-service-phospho-A-baumannii-Sk17-5-PBS-level2\_20131007  
 Method ITMS; CID Pepti... 110.33

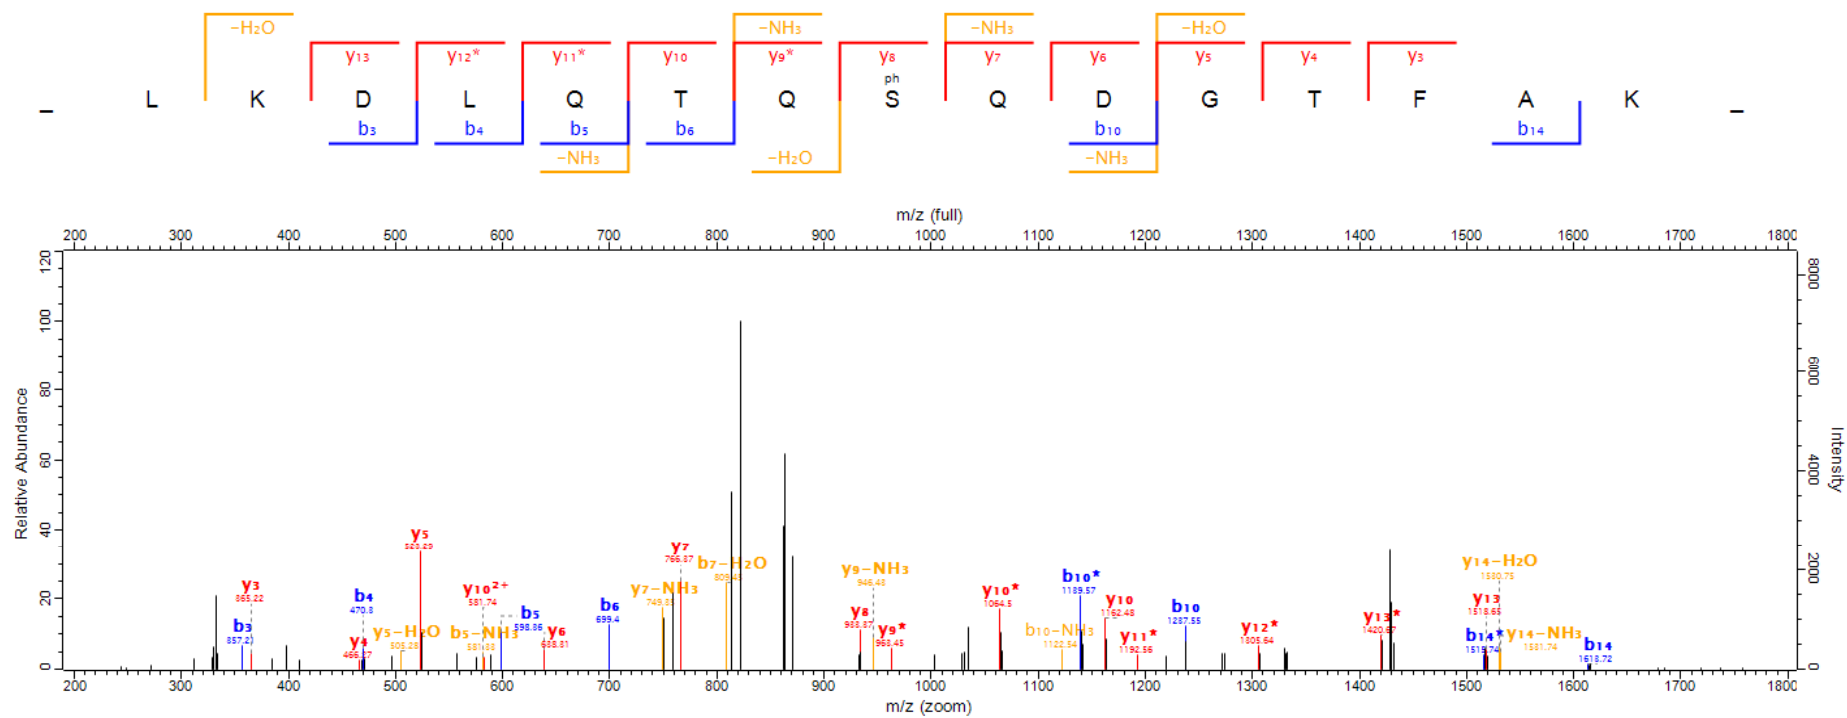



102-3

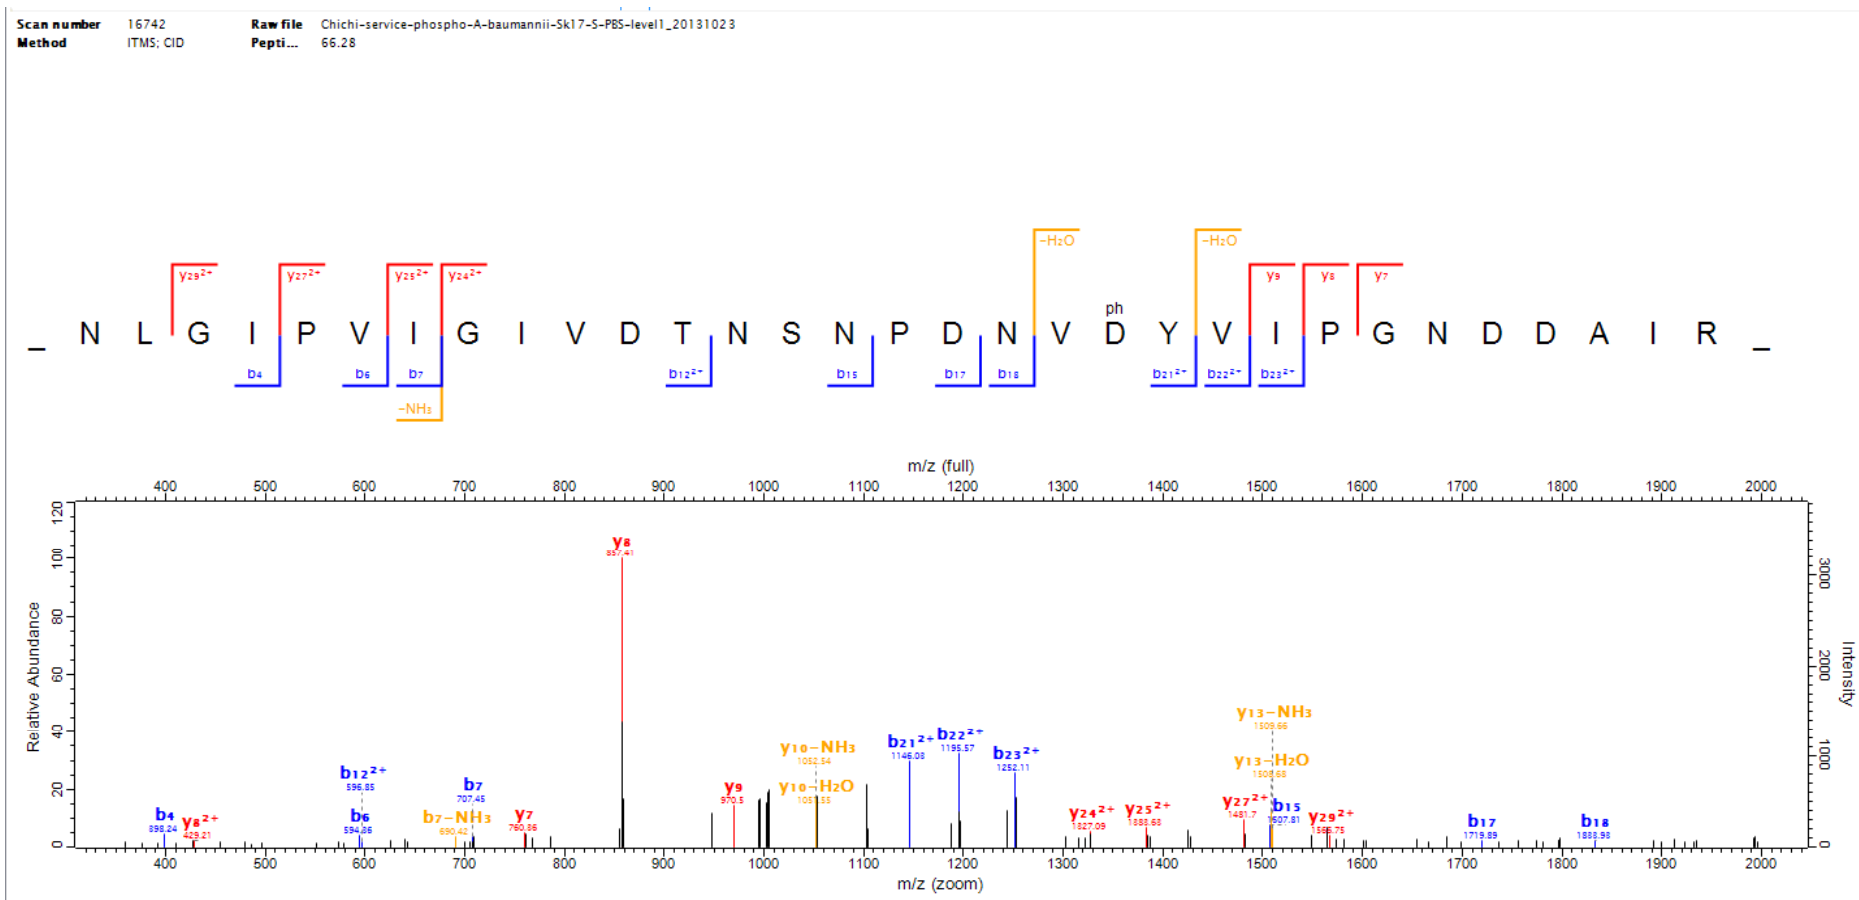

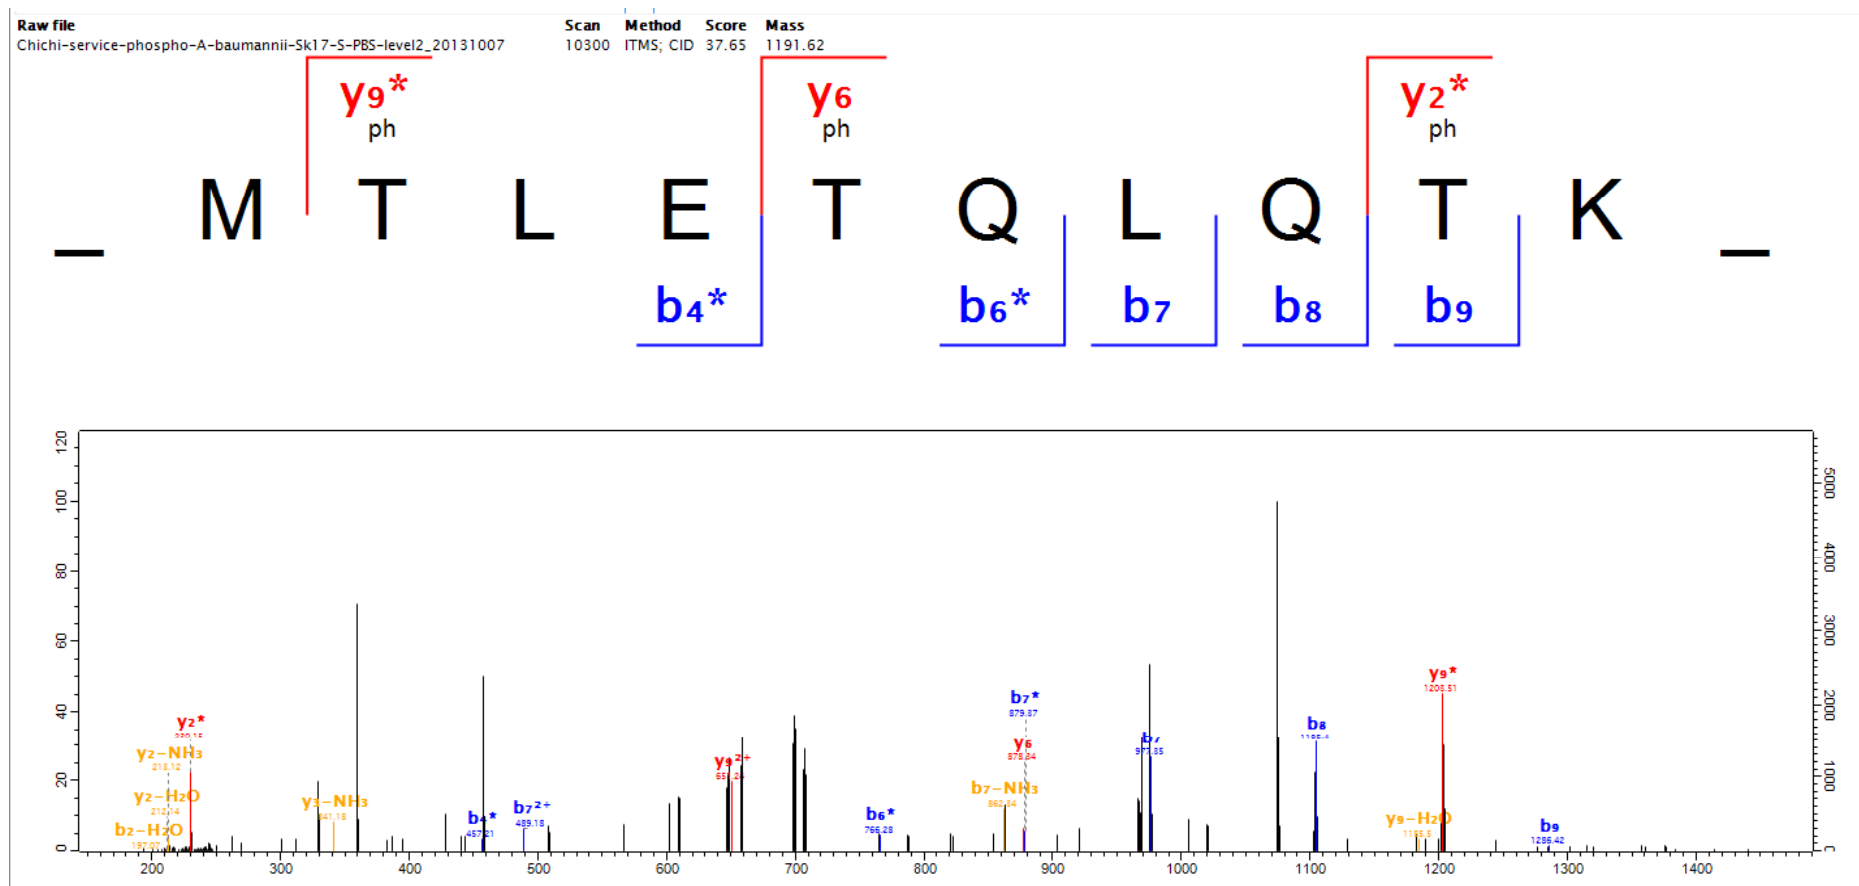

Scan number 4565 Raw file Chichi-service-phospho-A-baumannii-Sk17-S-EtOH-level2\_20131007  
 Method ITMS: CID Pepti... 79.01

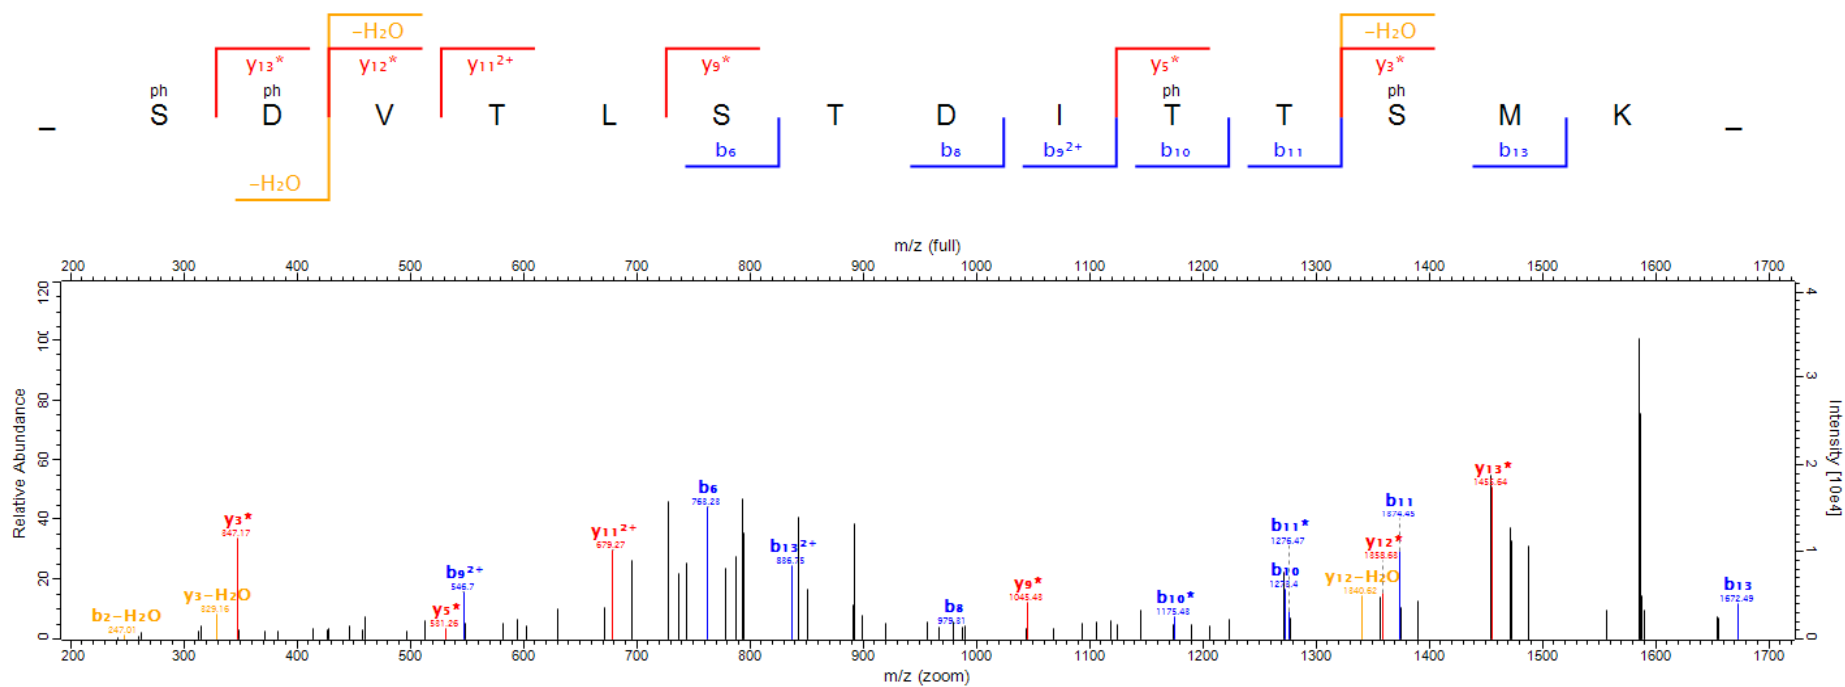

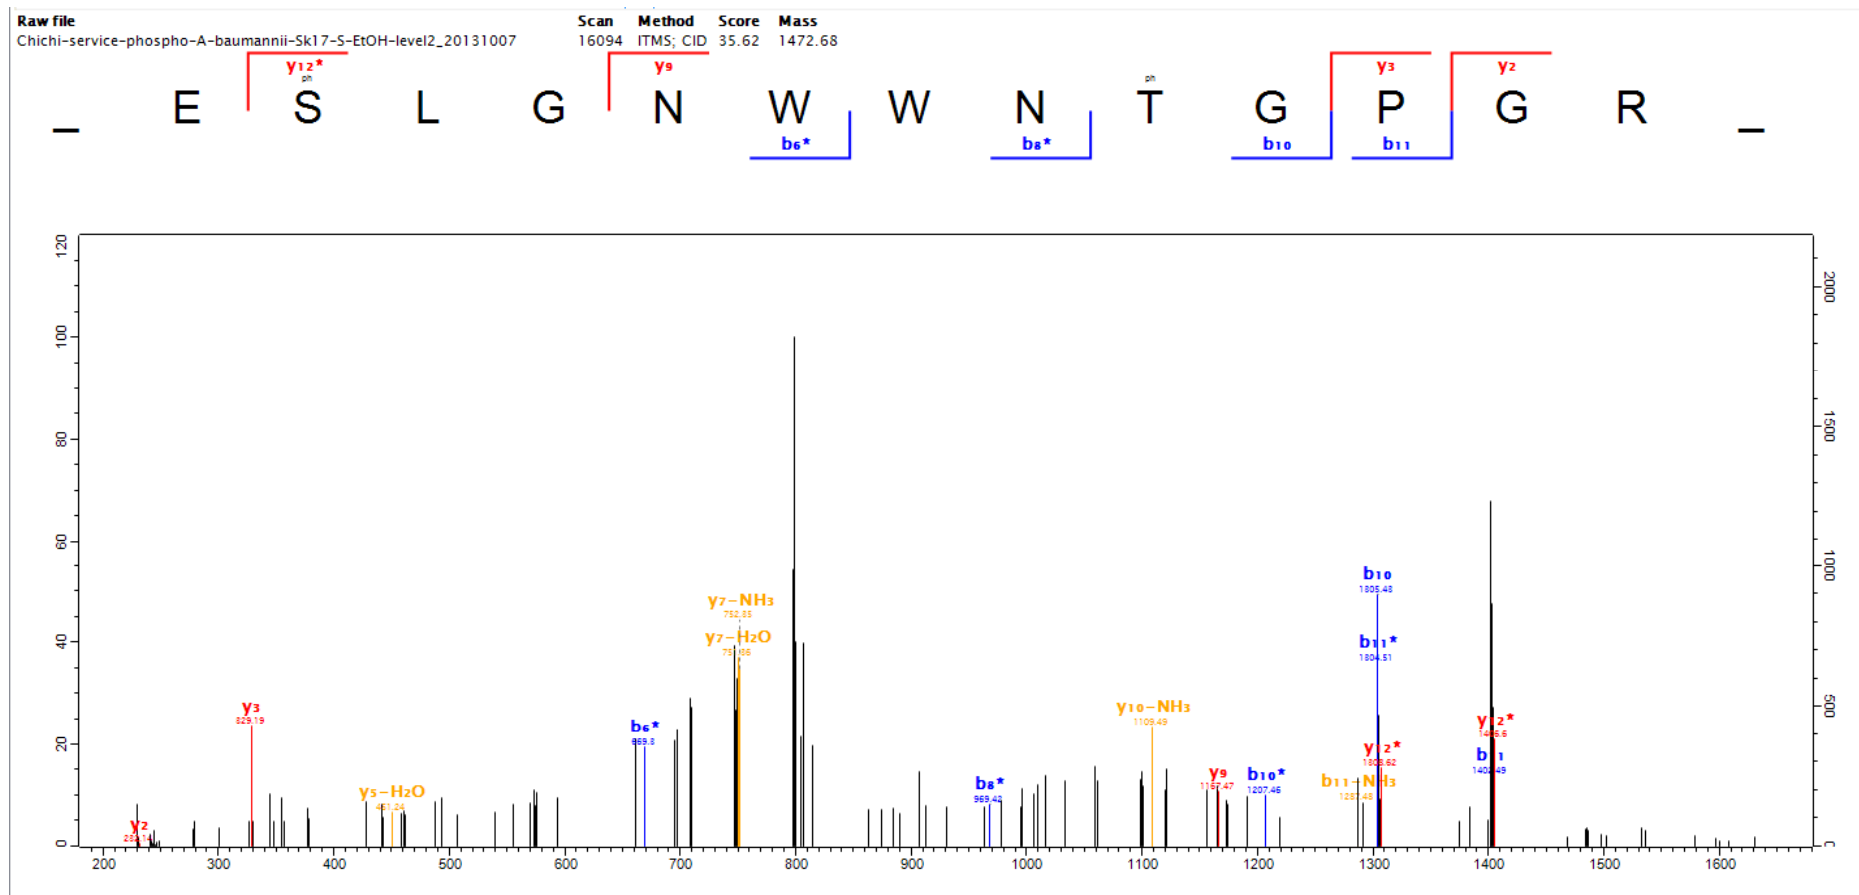

106-1

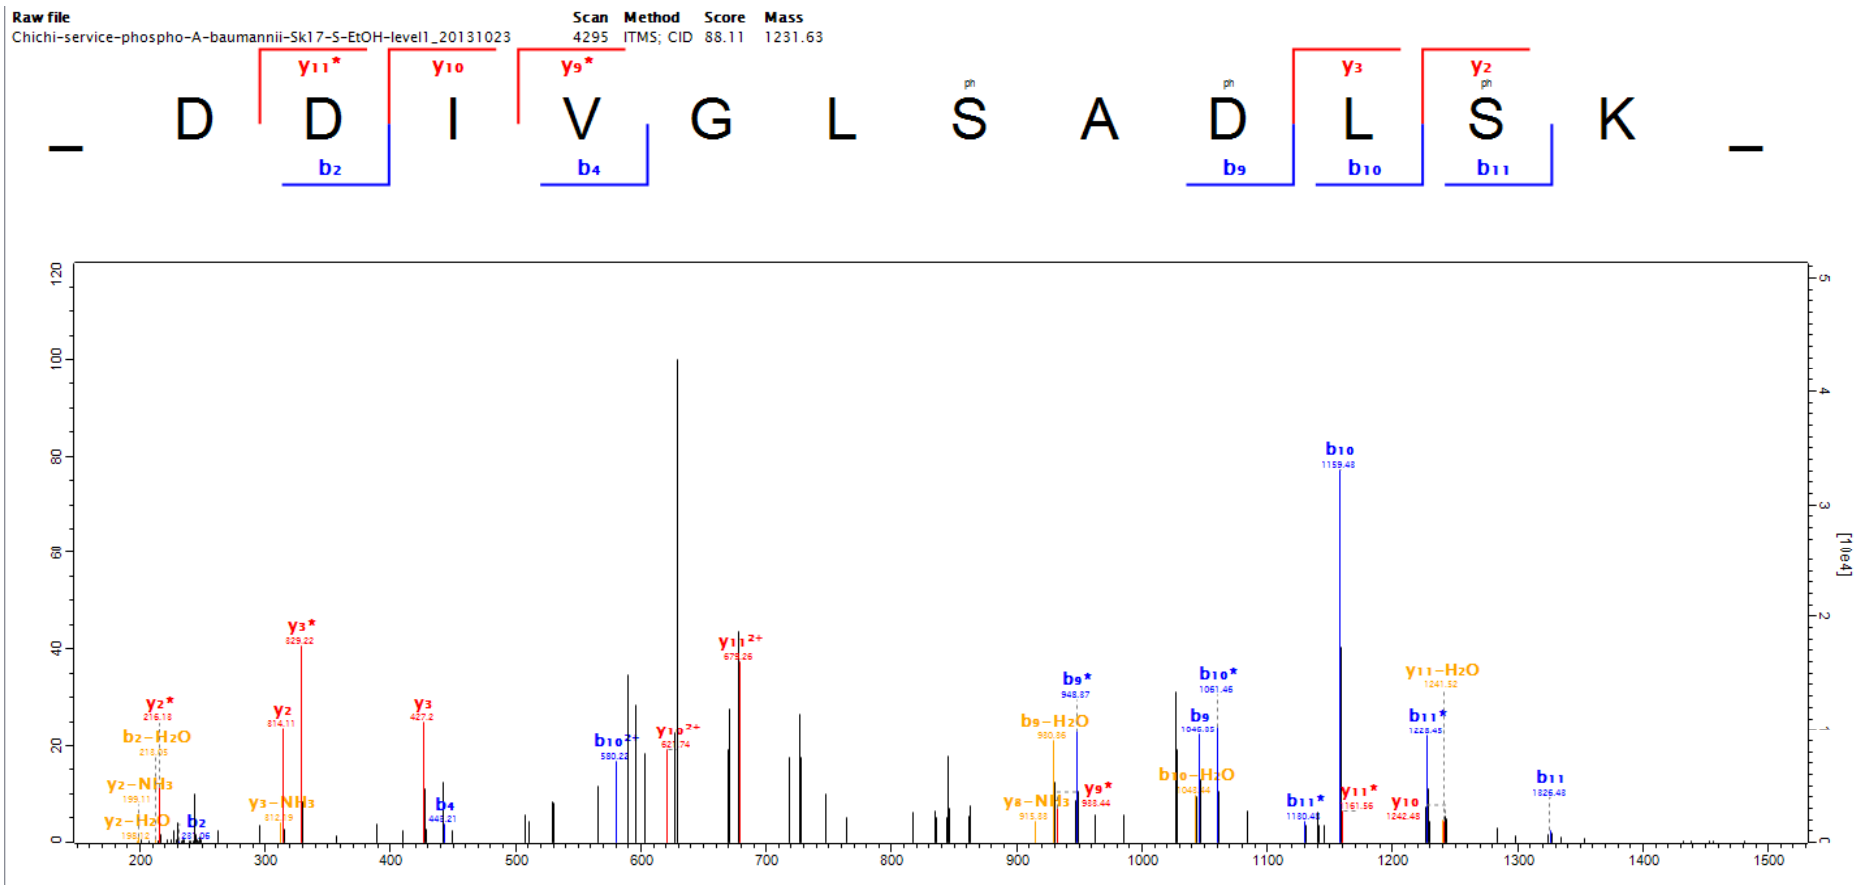

106-2

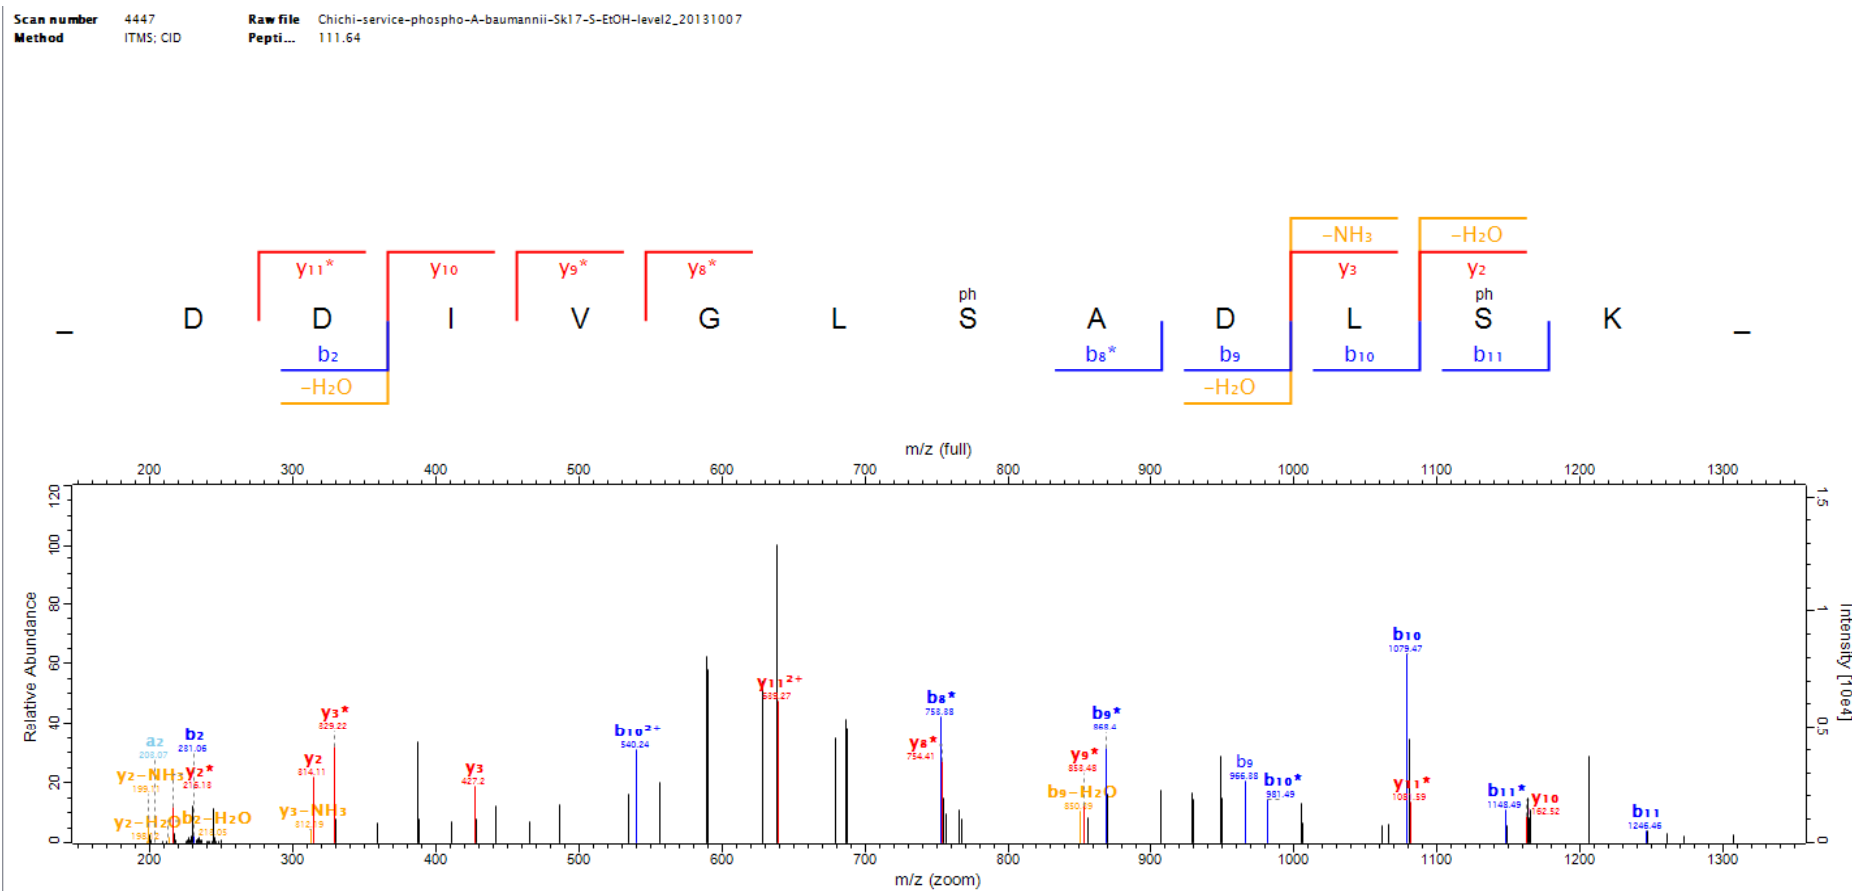

107-1

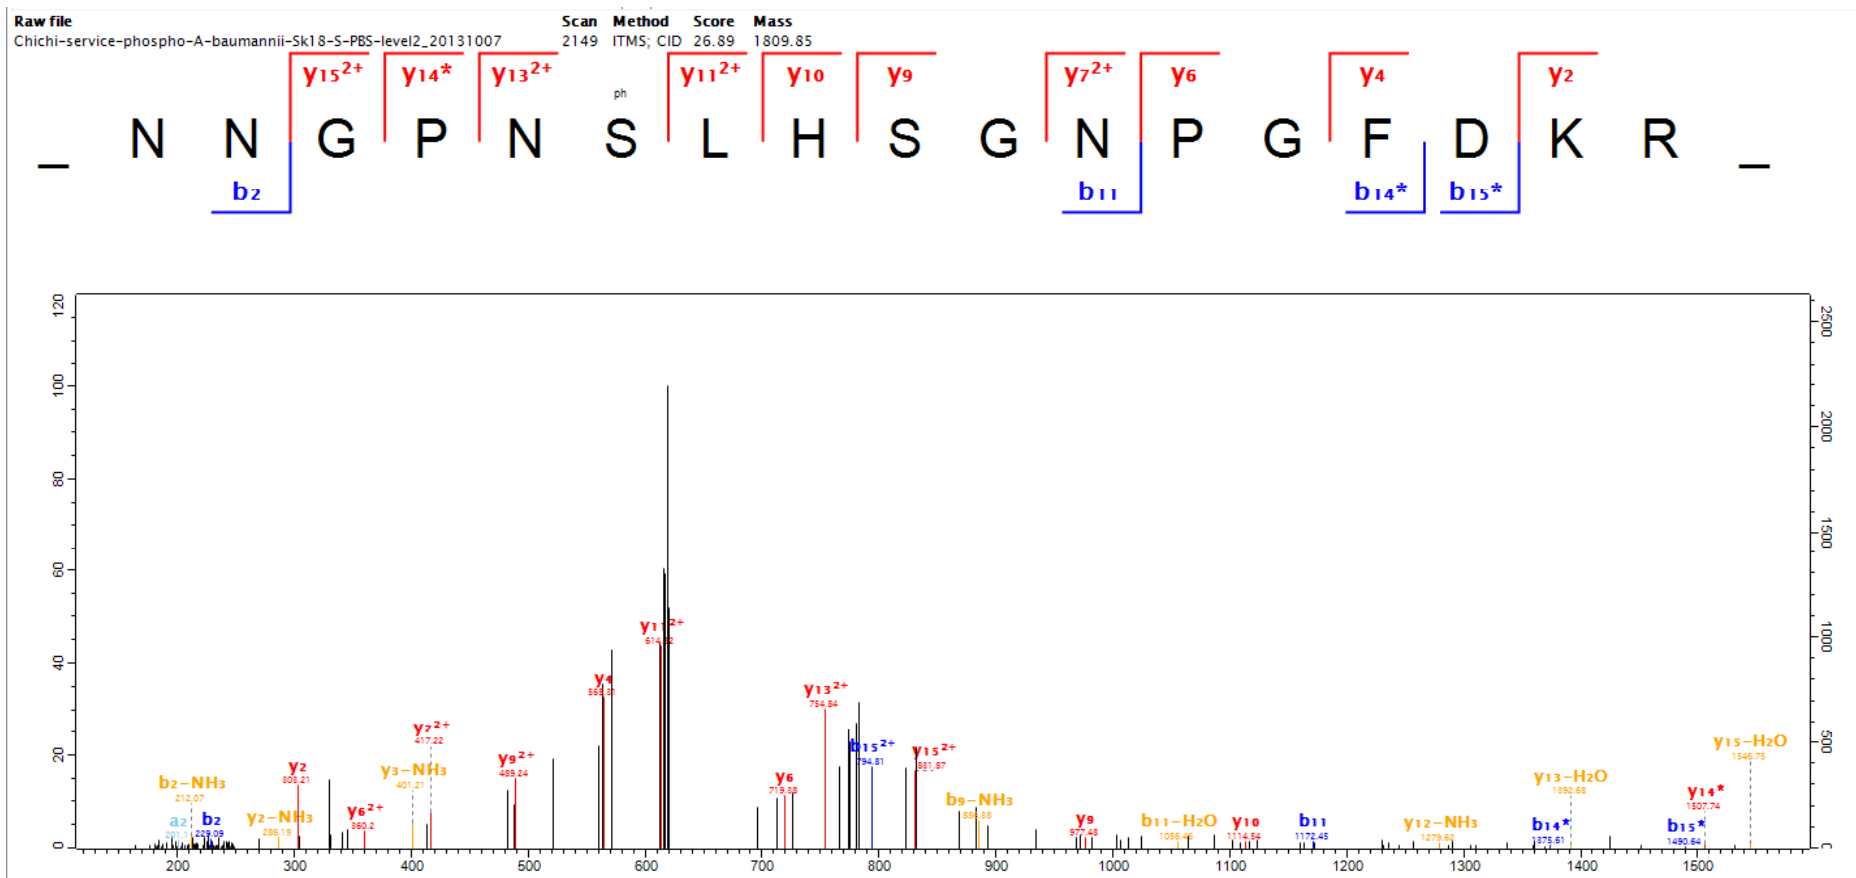

107-2

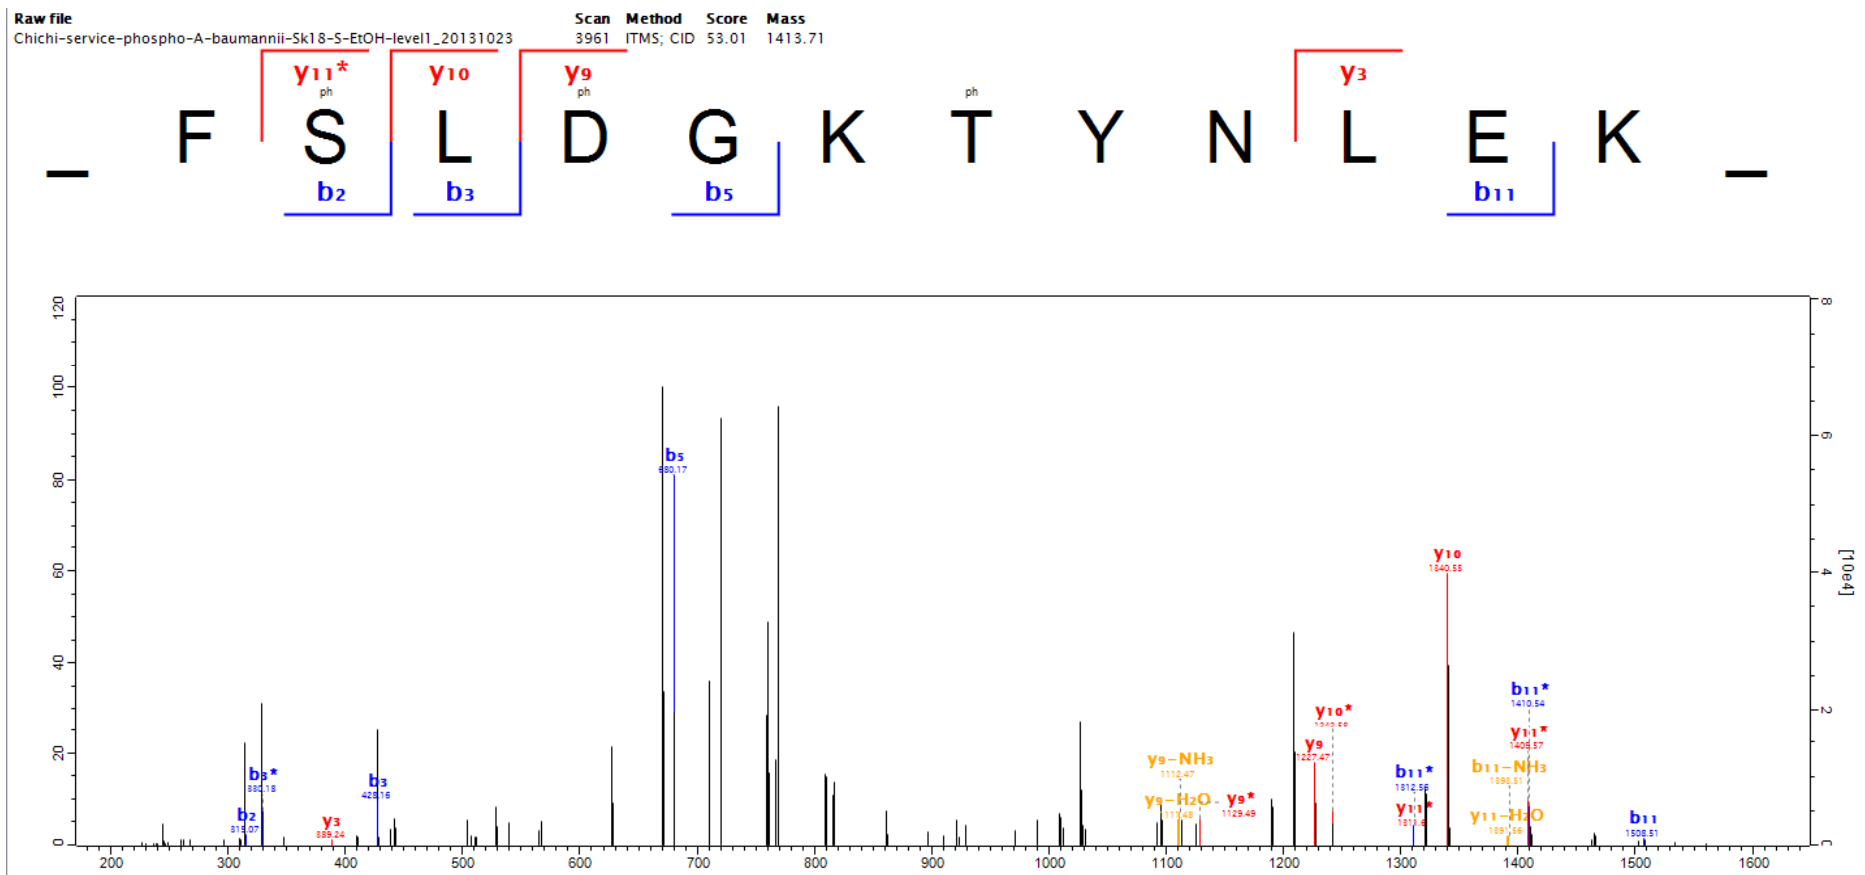



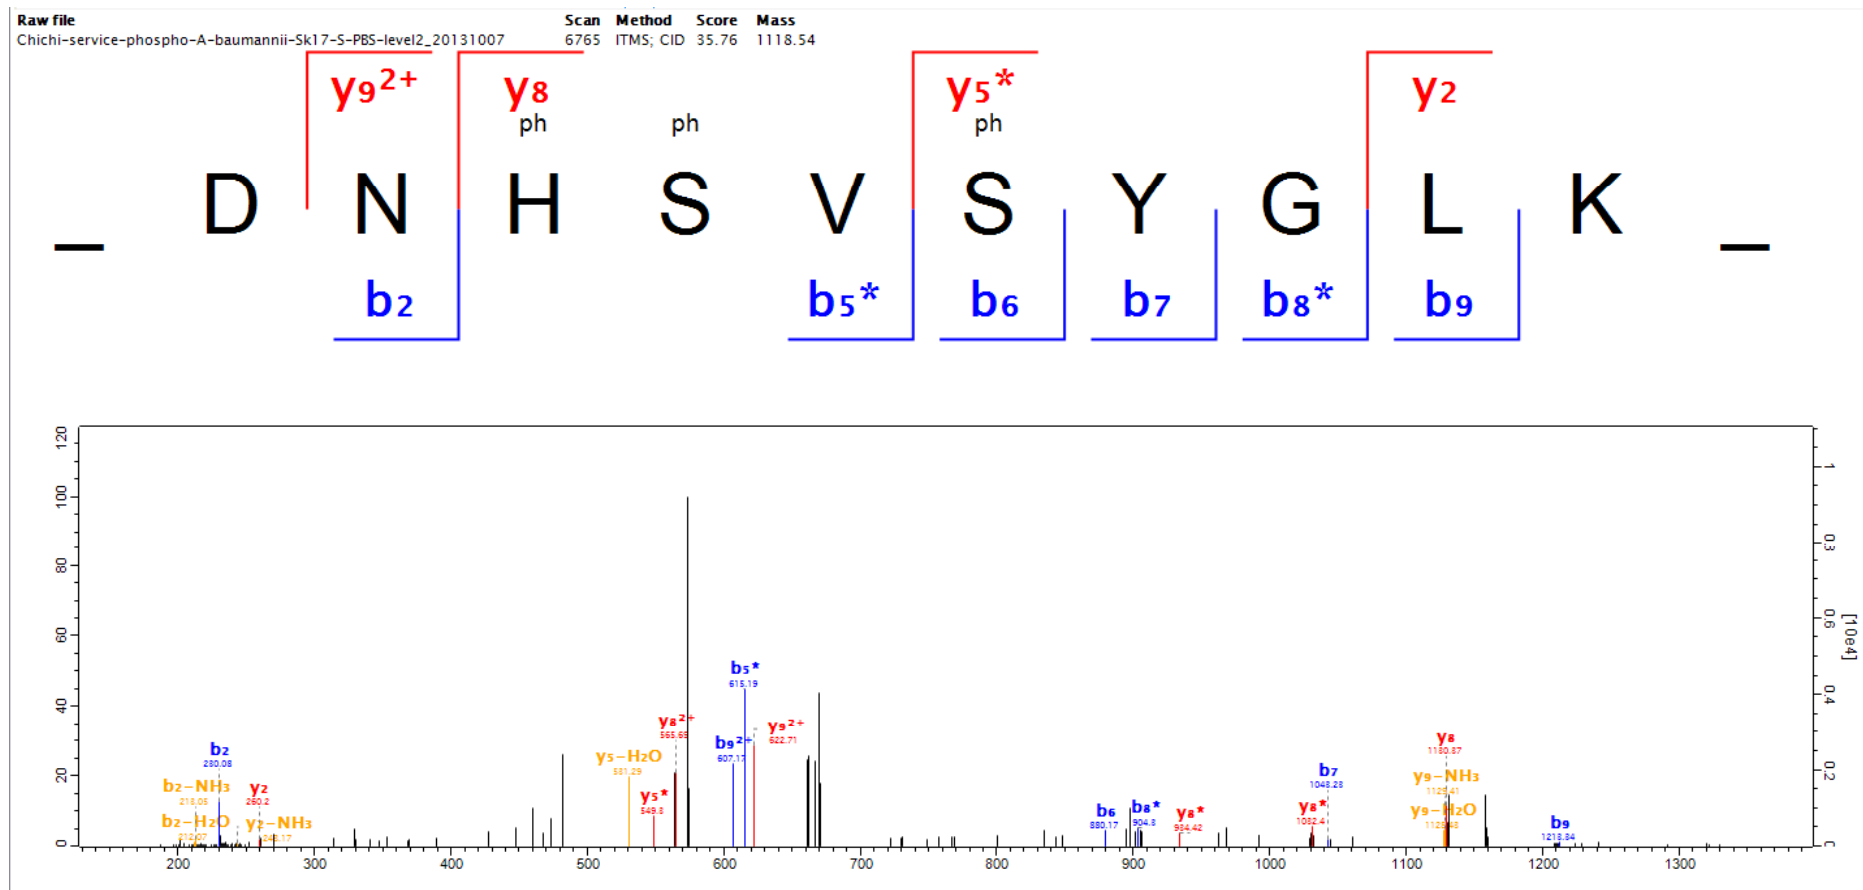

109-1

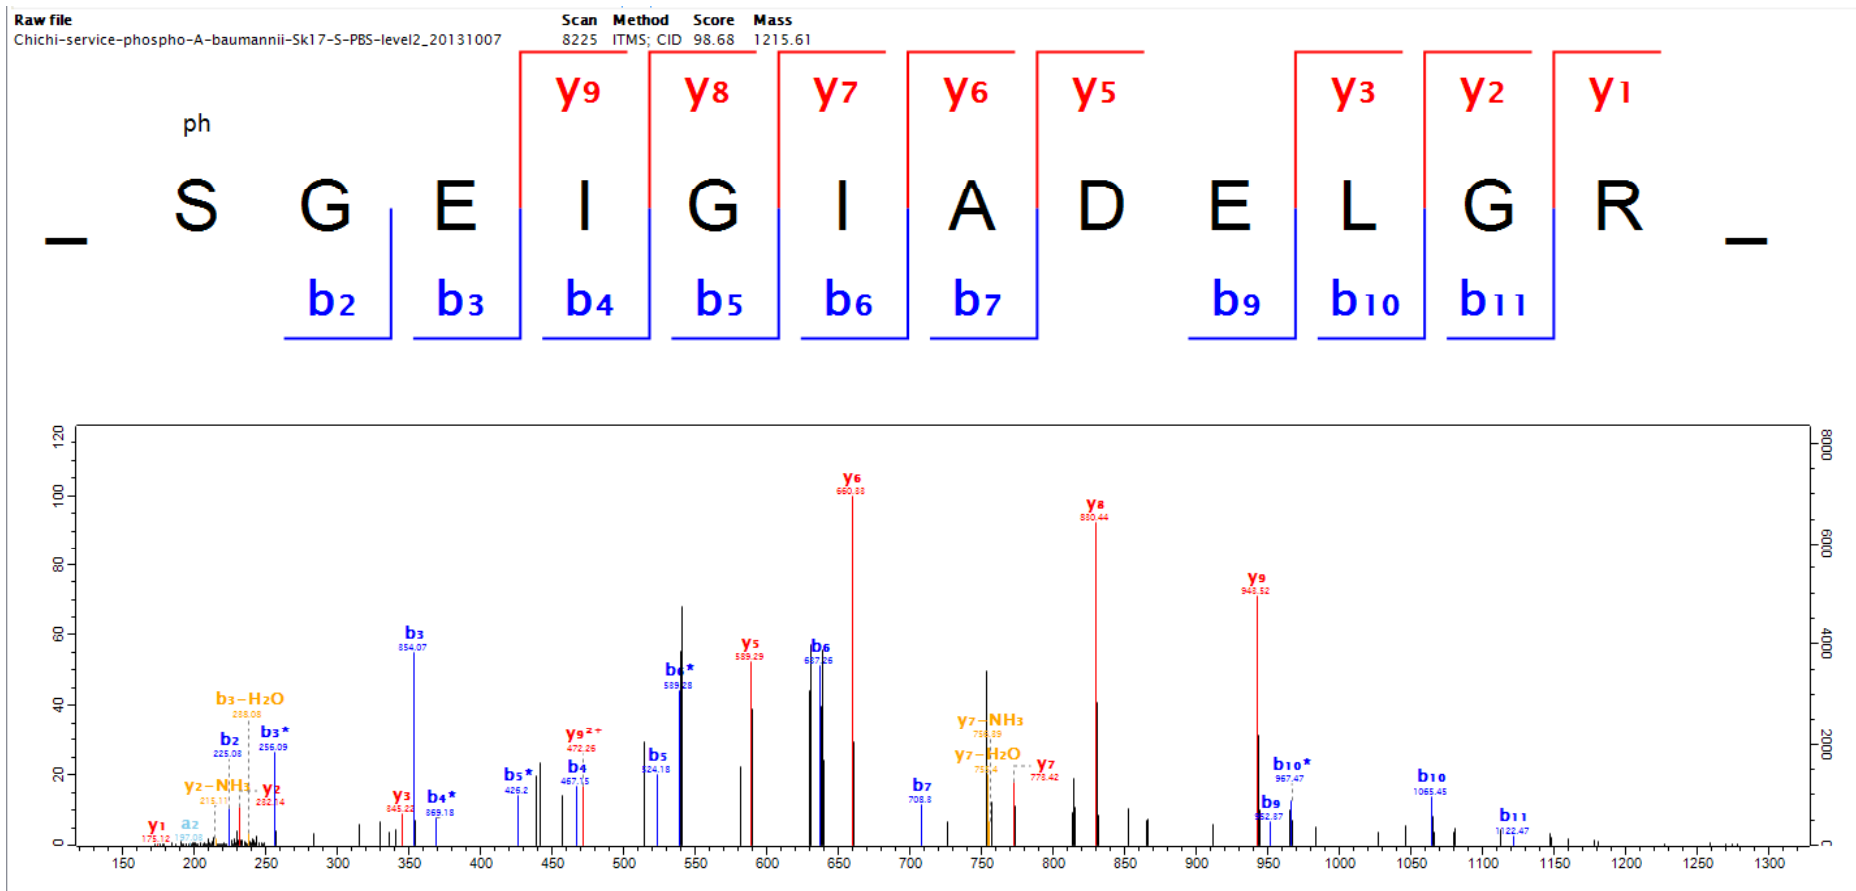

109-2

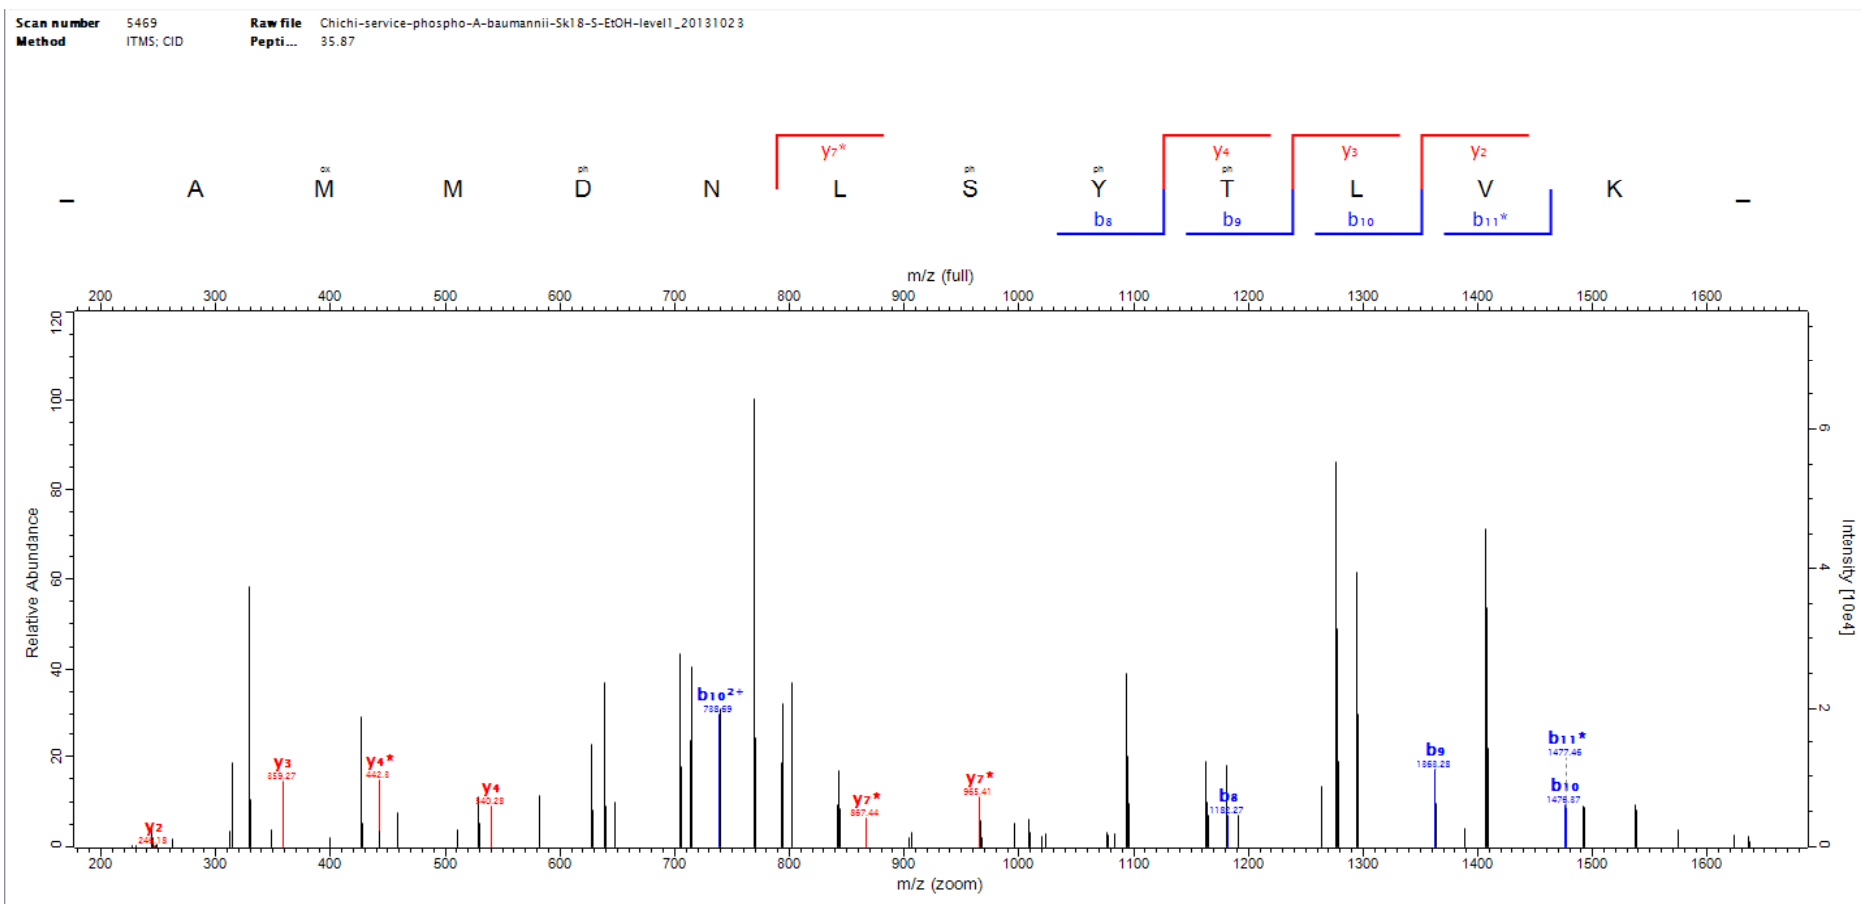

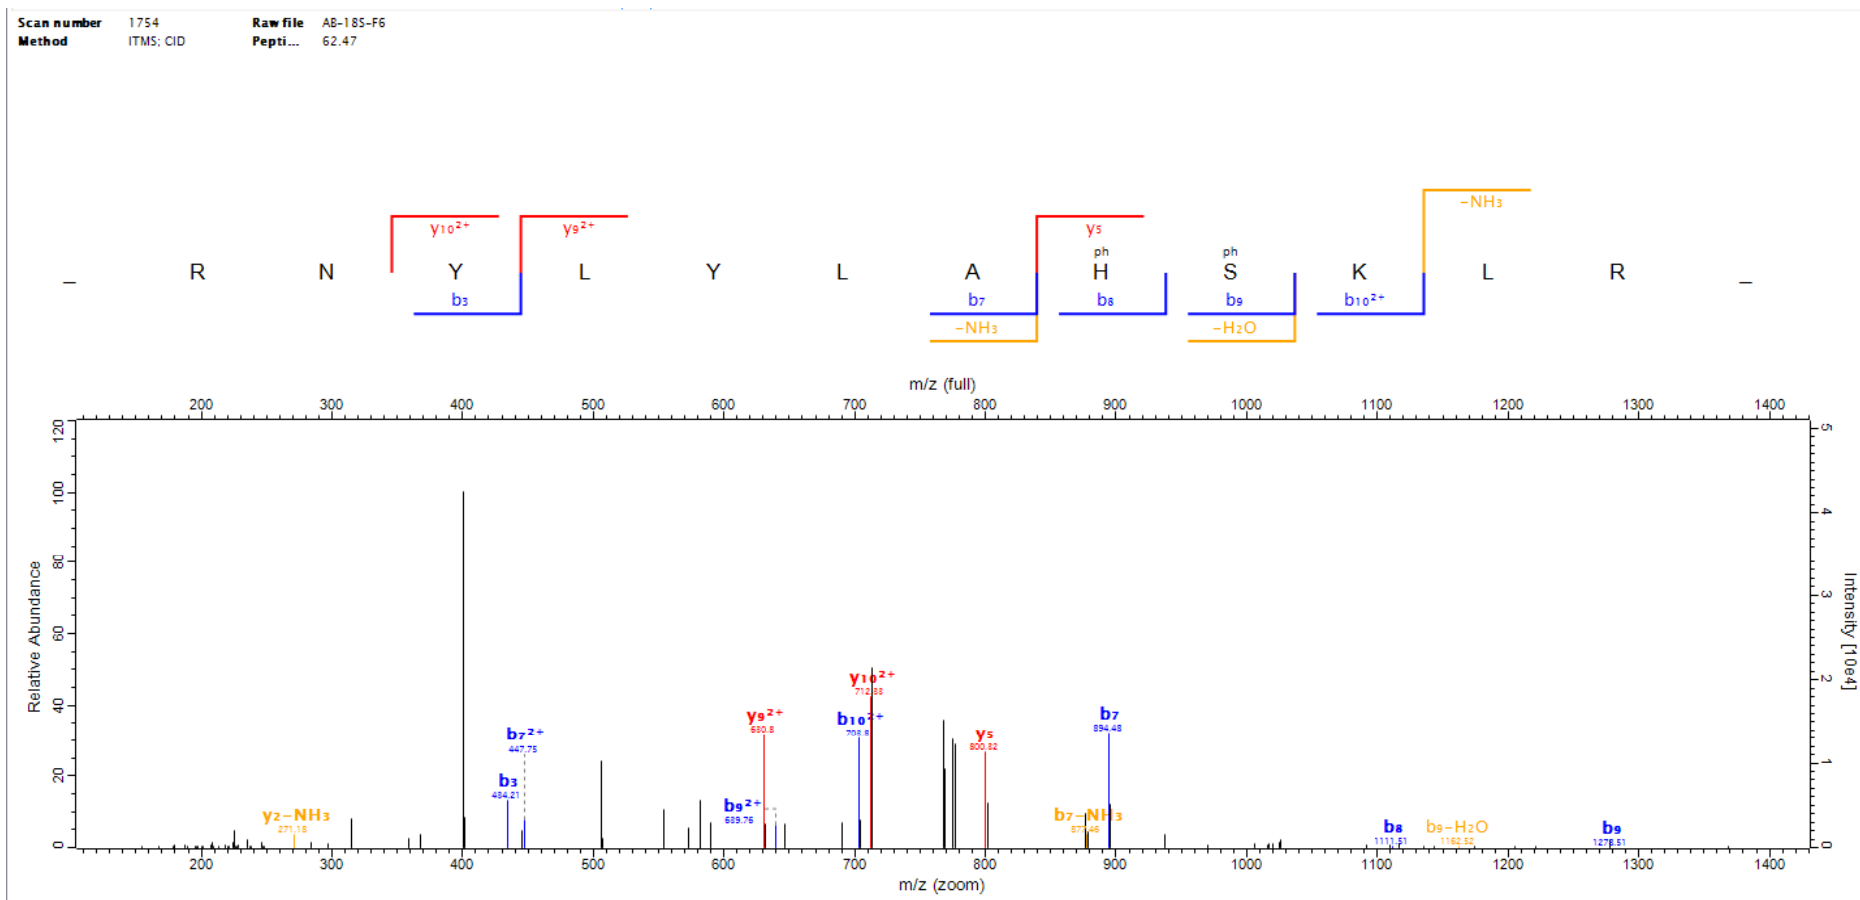

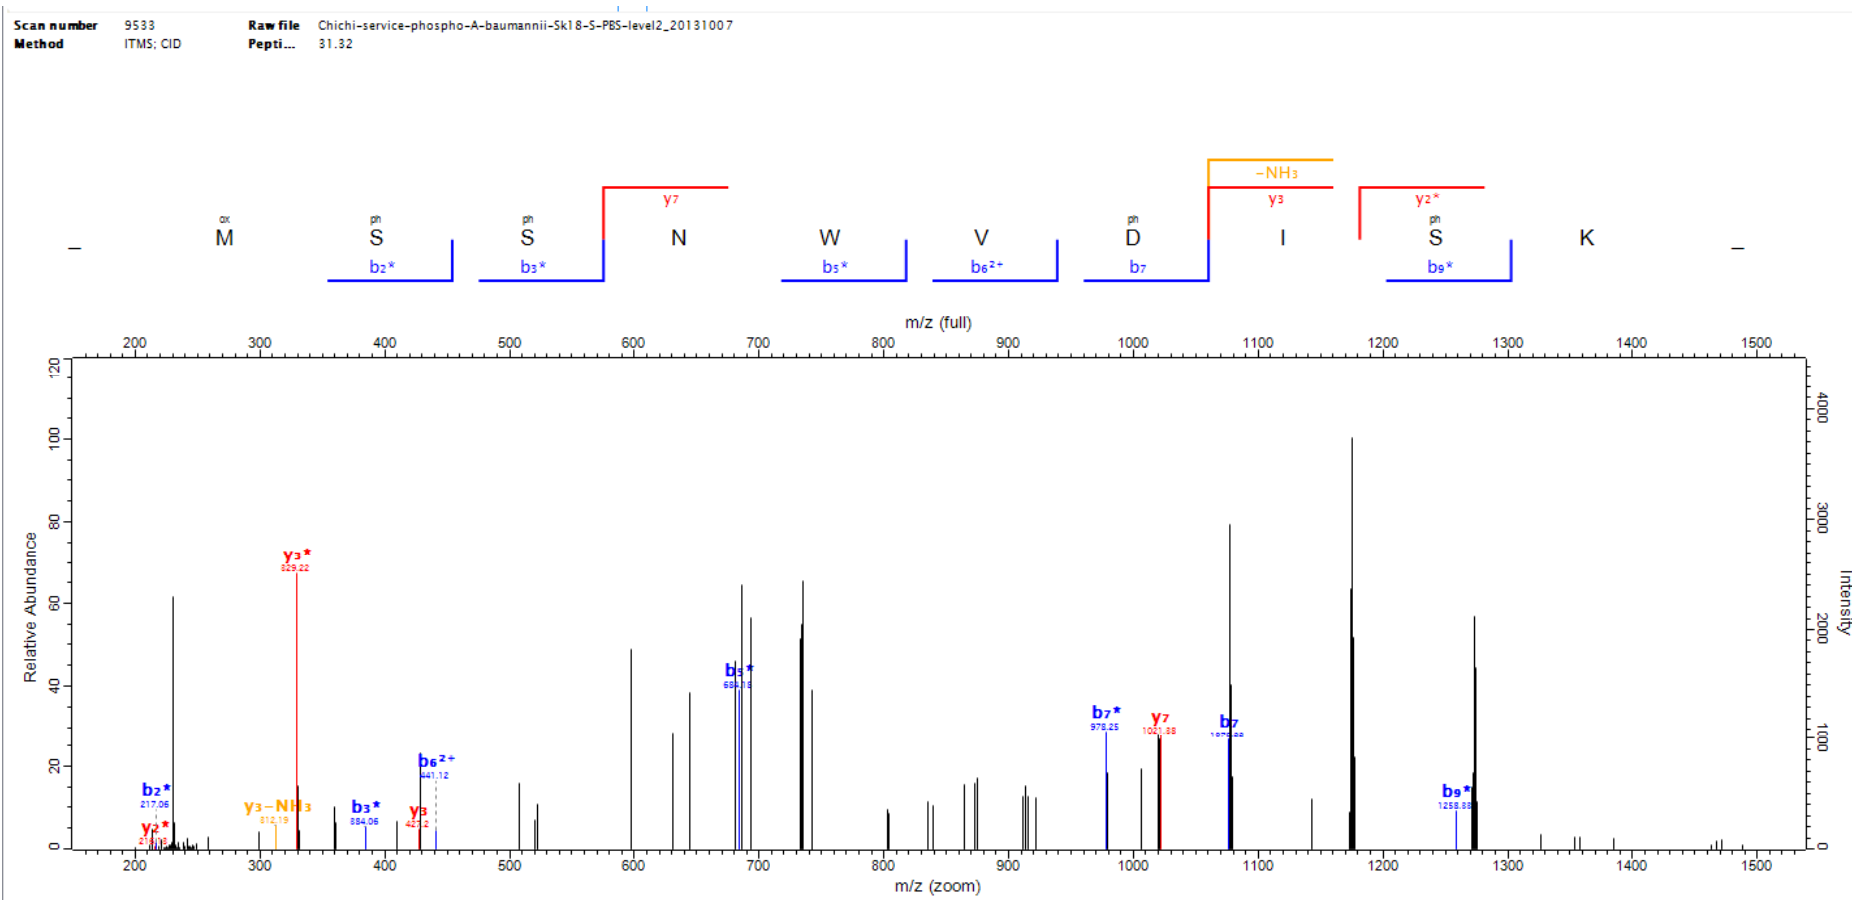

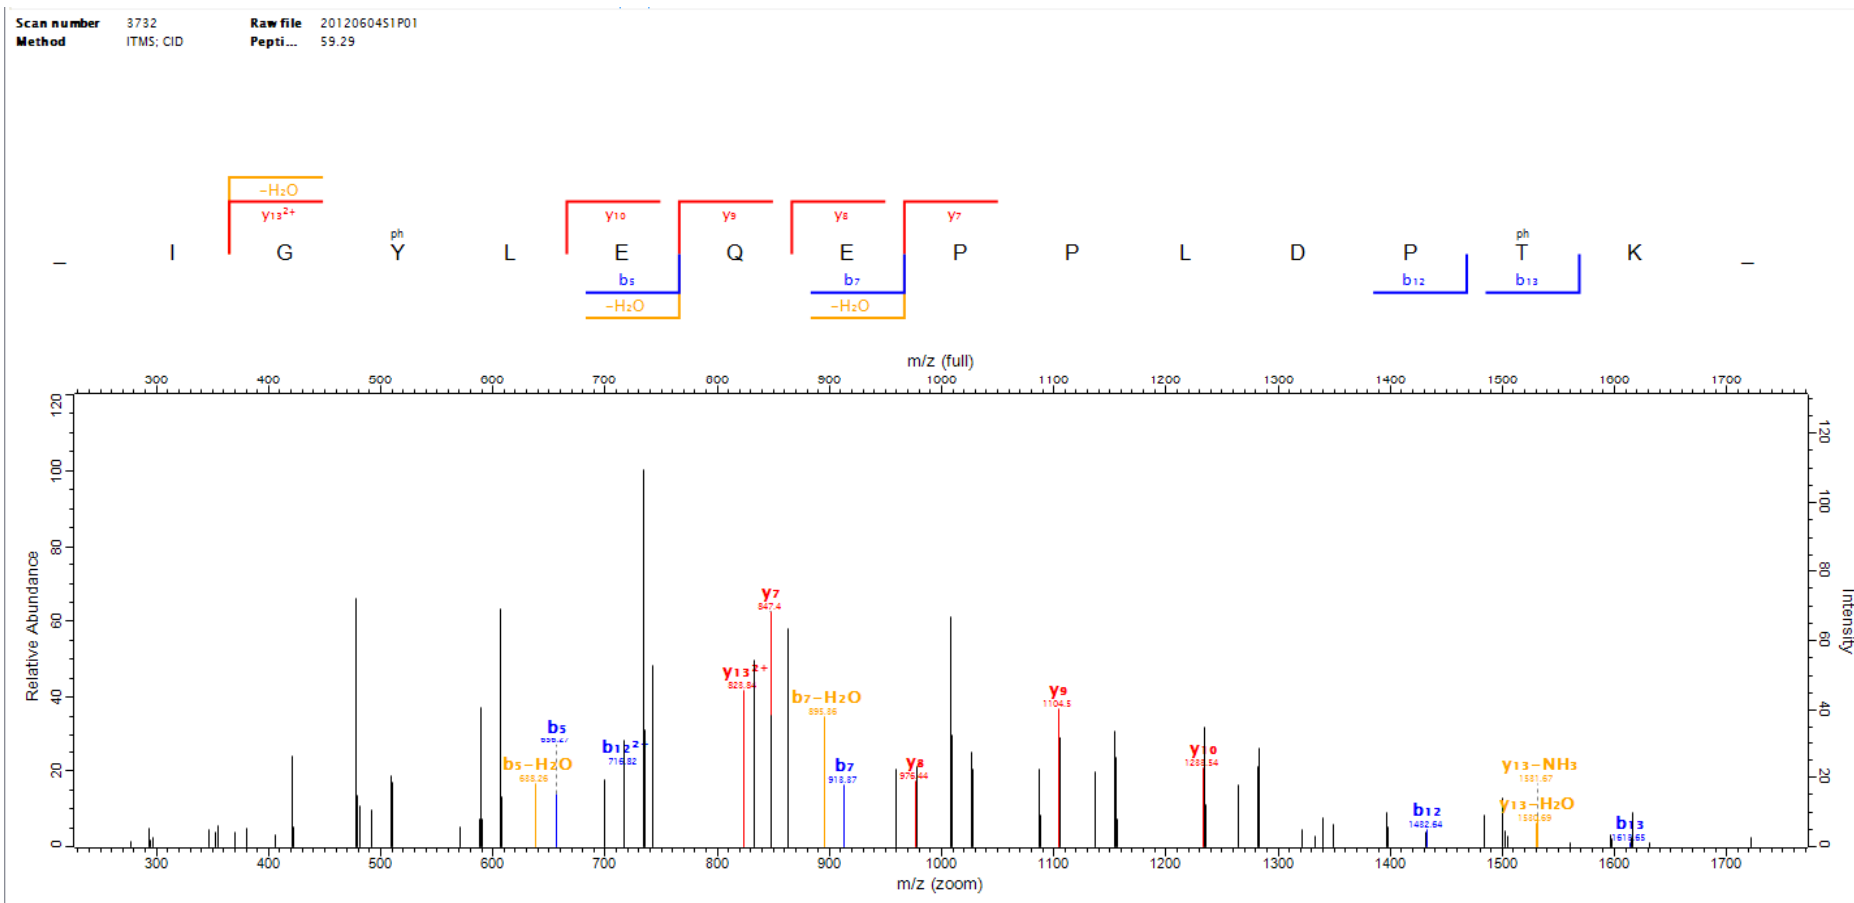

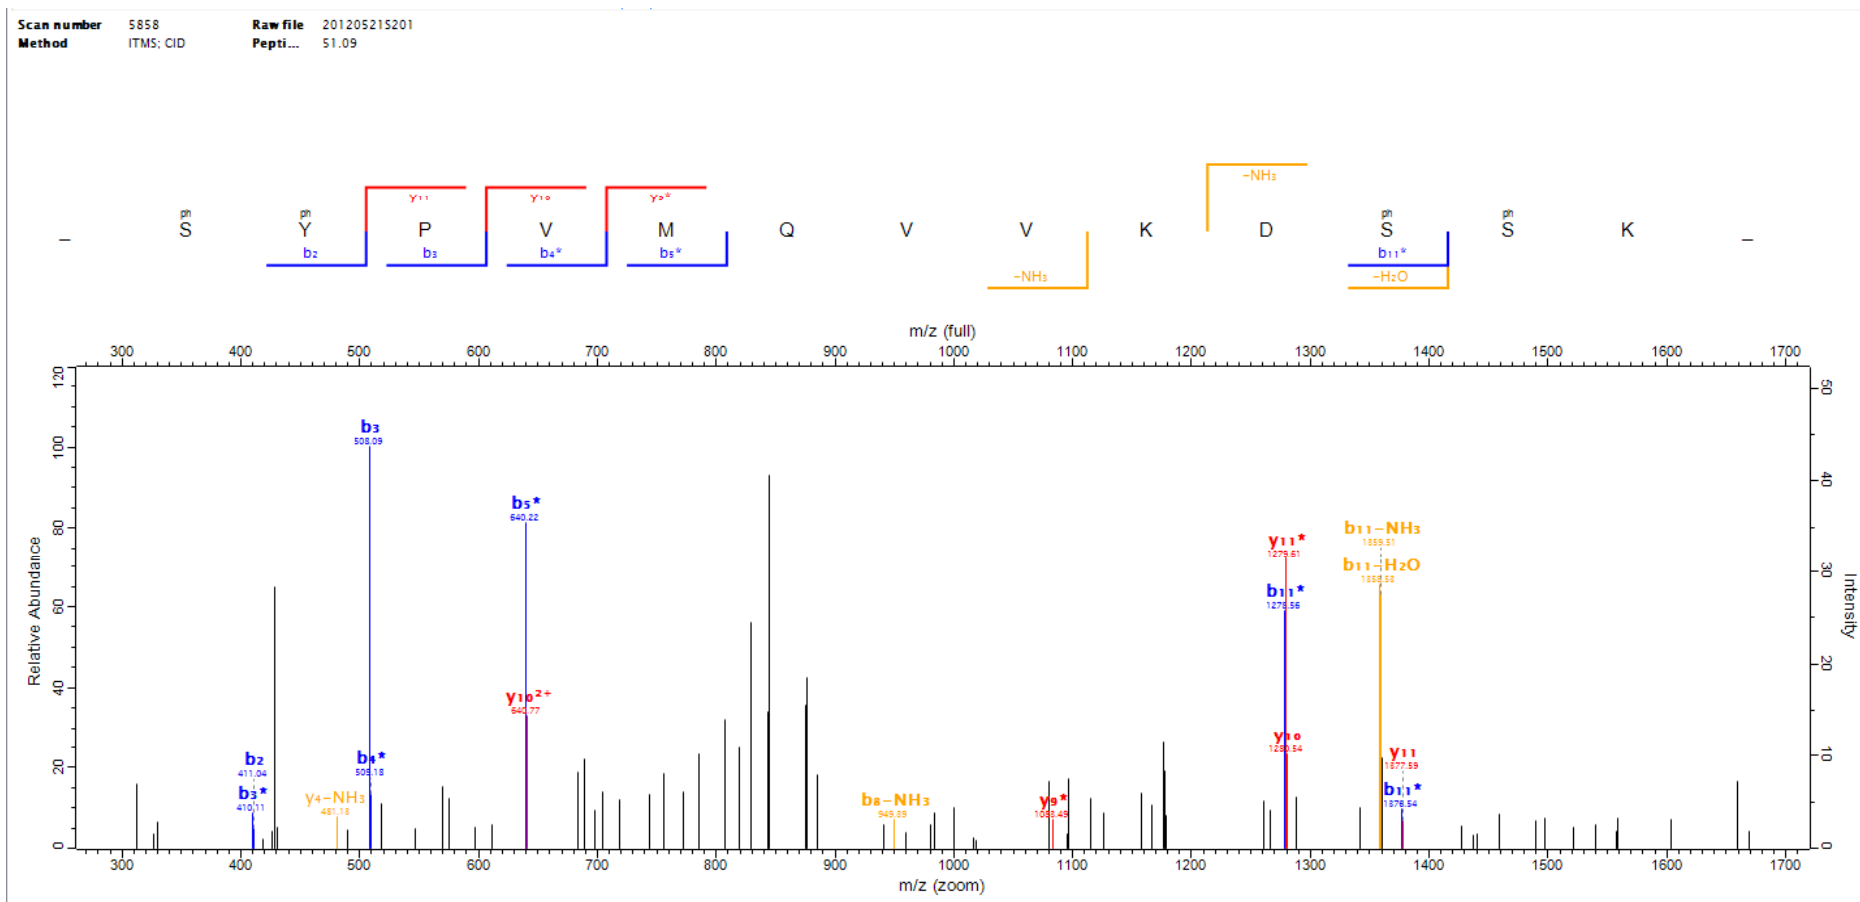

114-1

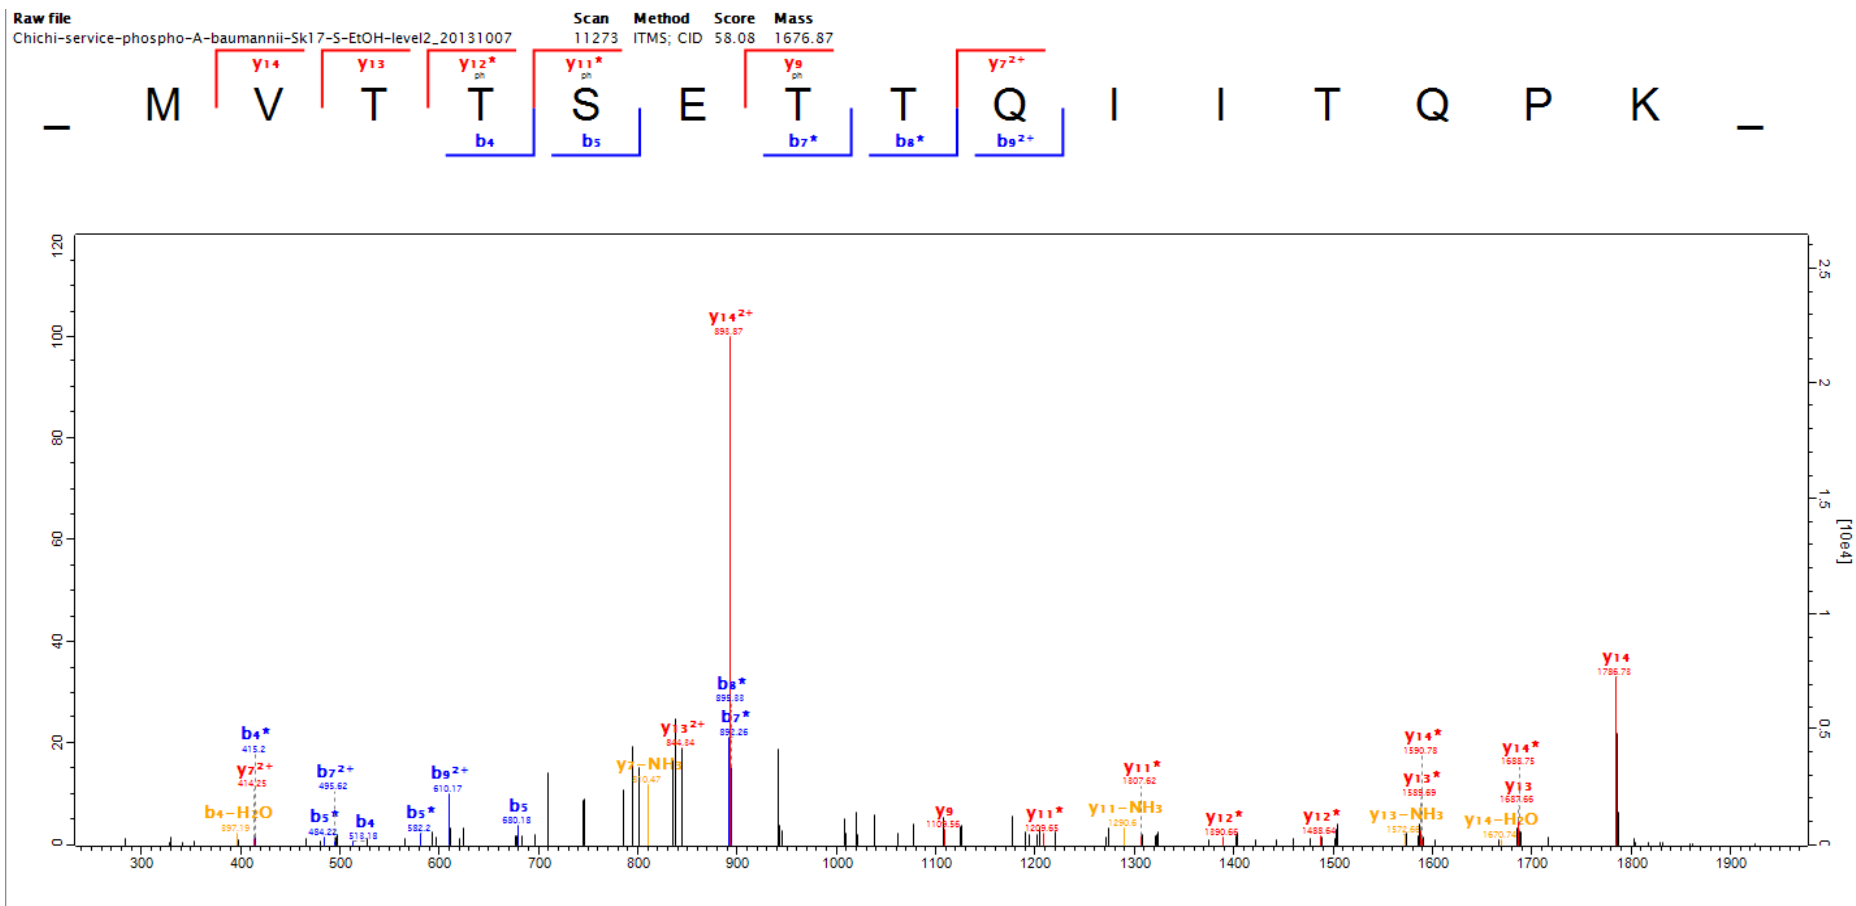



114-2

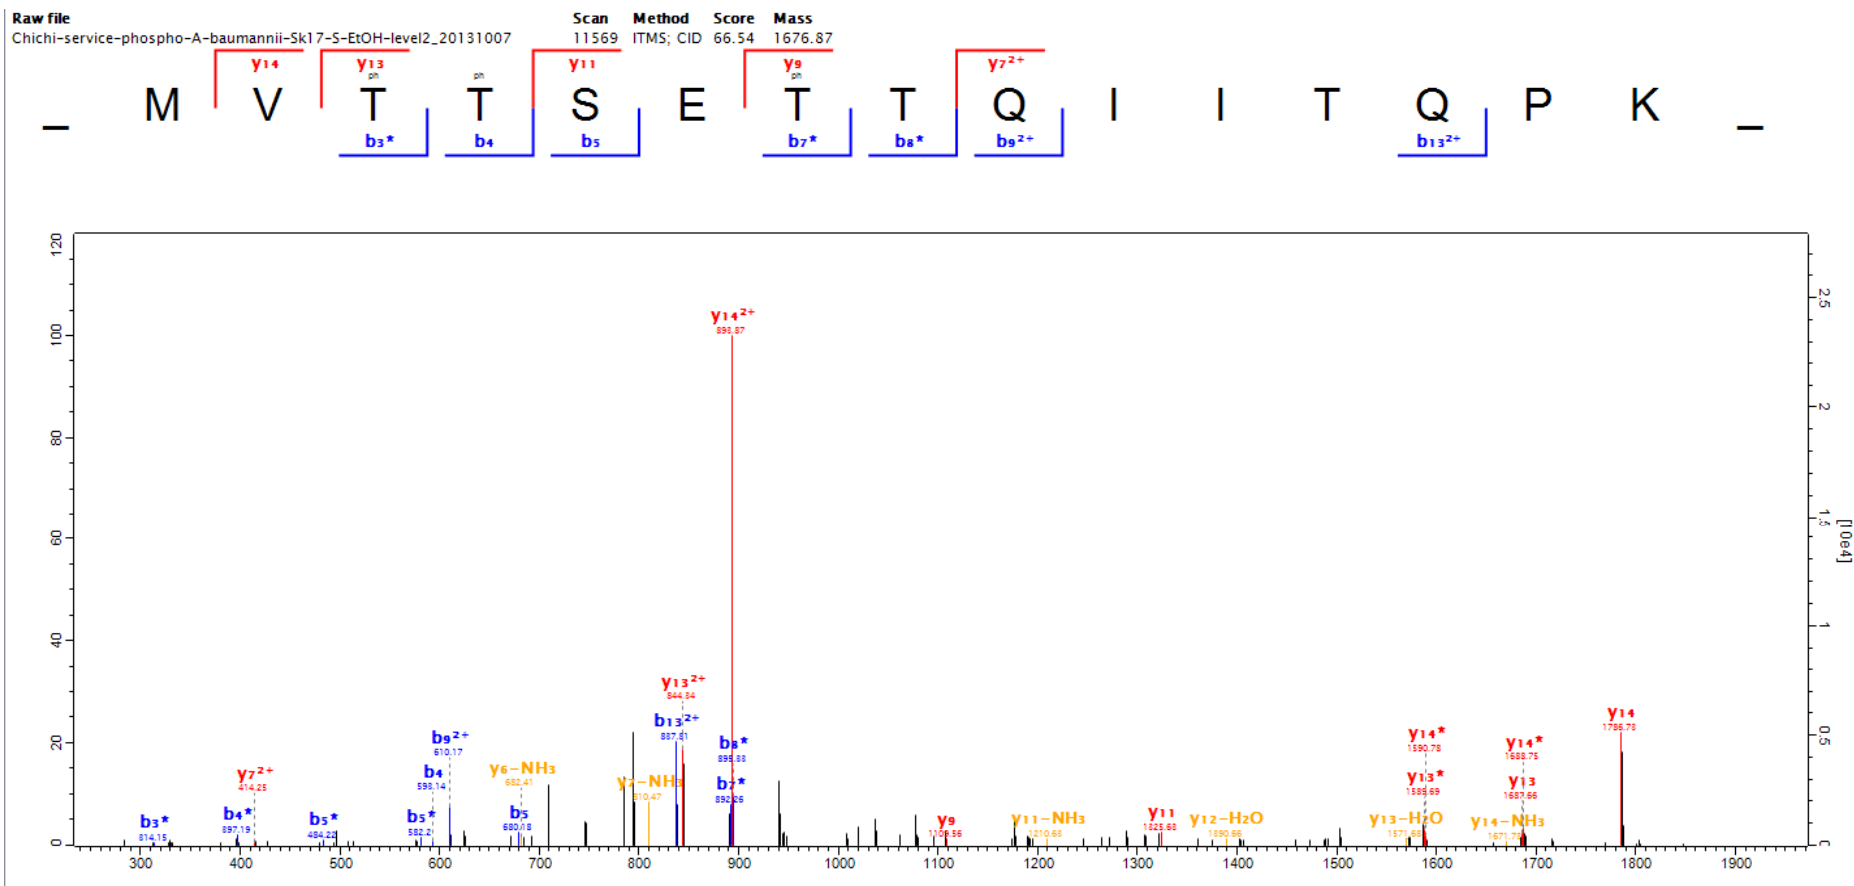

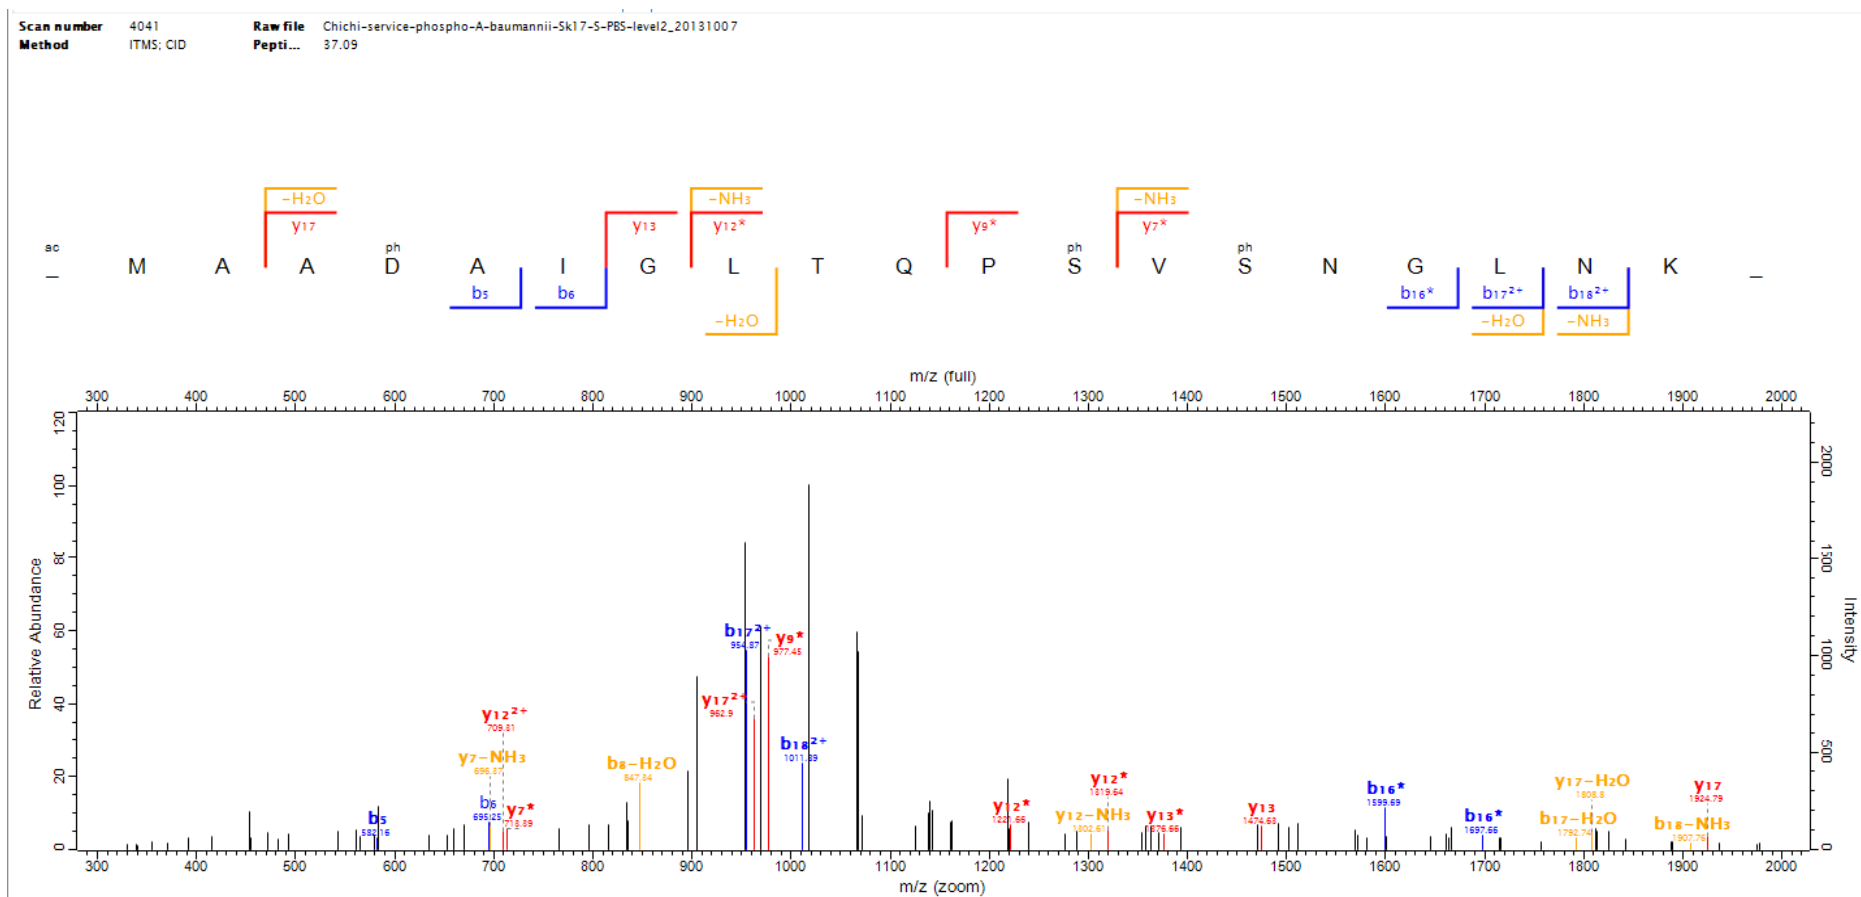

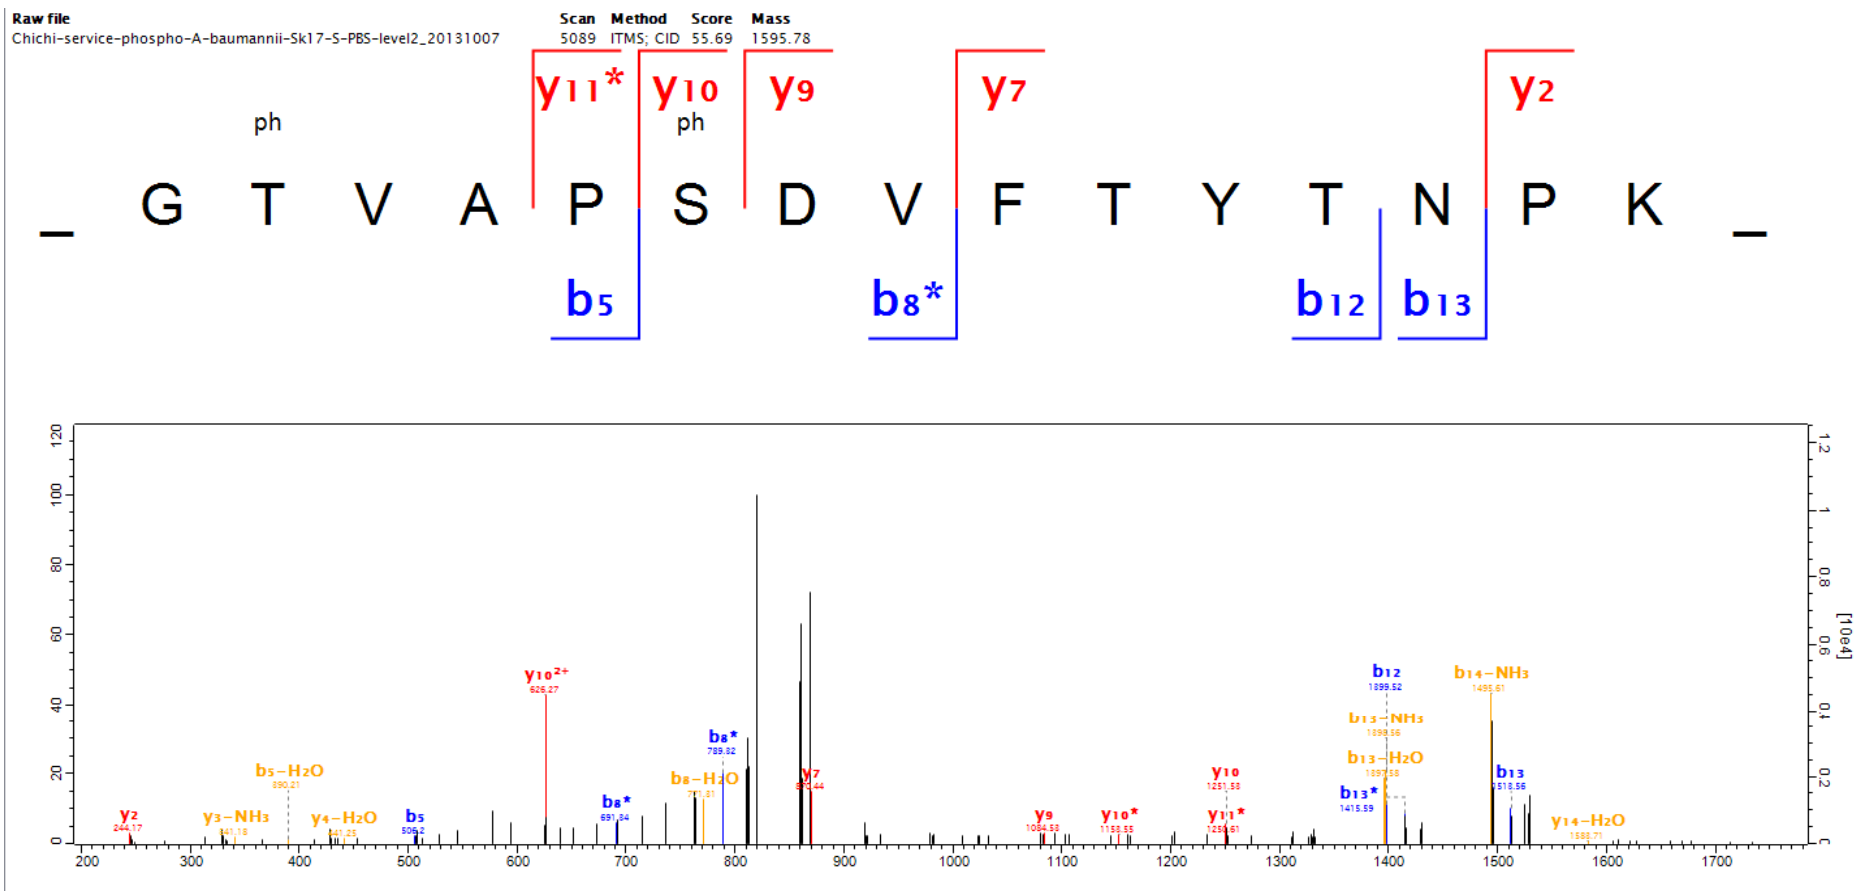

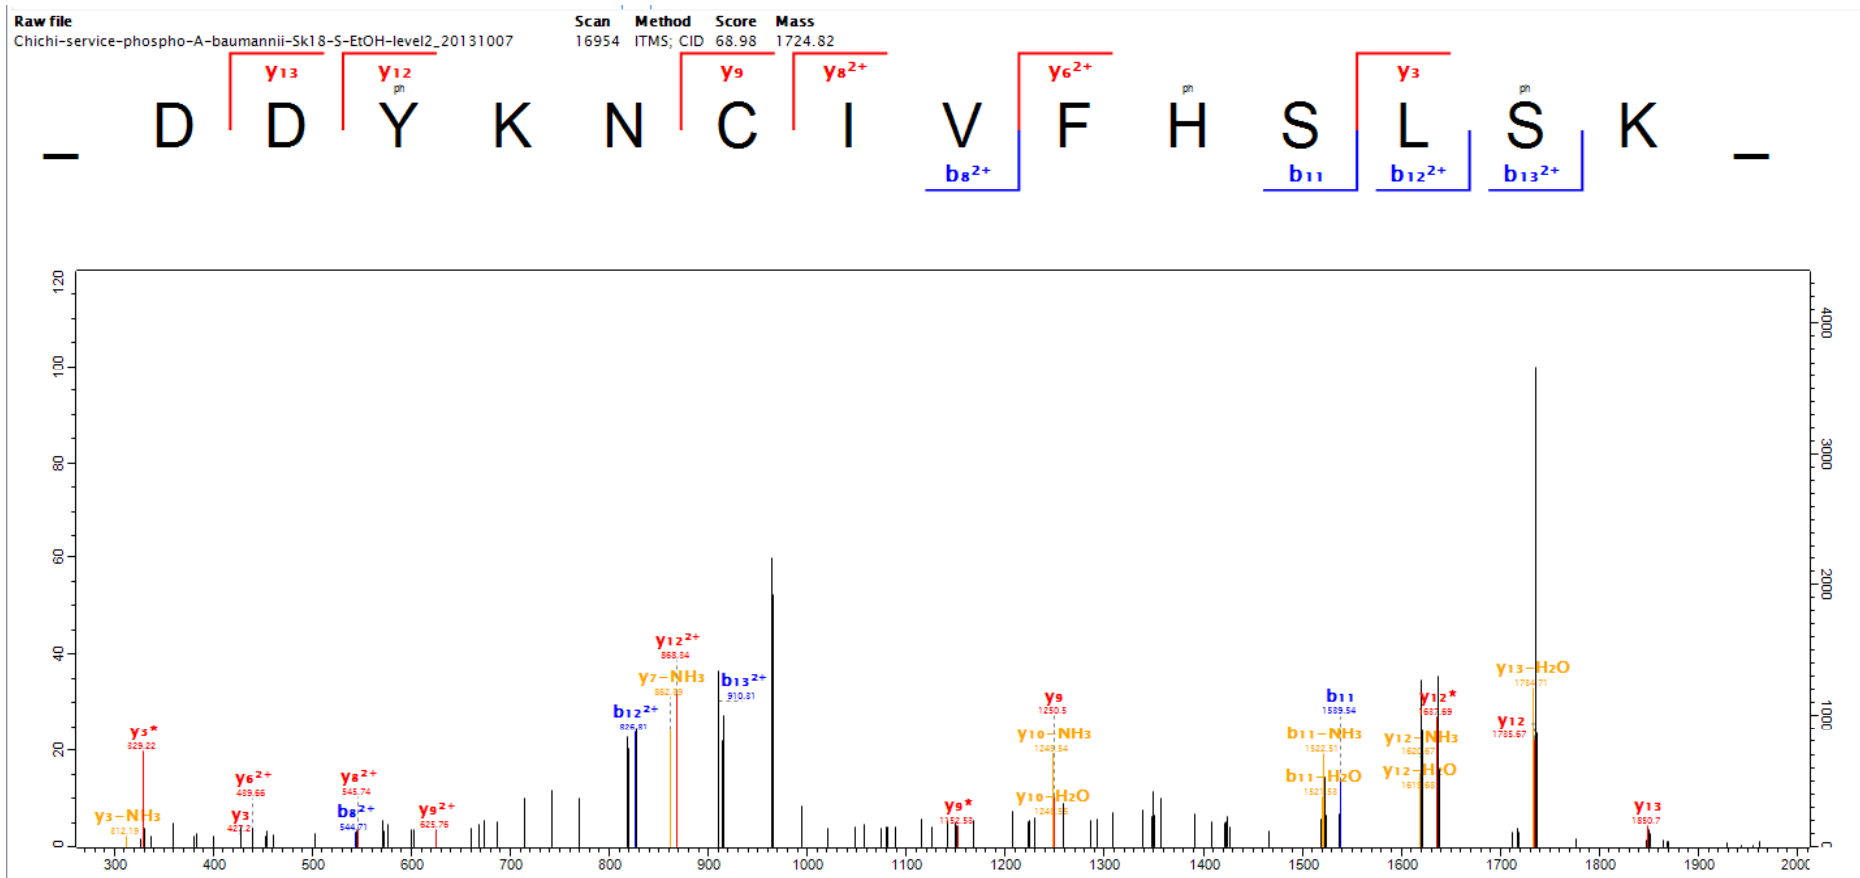

Scan number 10443 Raw file Chichi-service-phospho-A-baumannii-Sk17-S-EtOH-level2\_20131007  
Method ITMS: CID Peptide 47.6

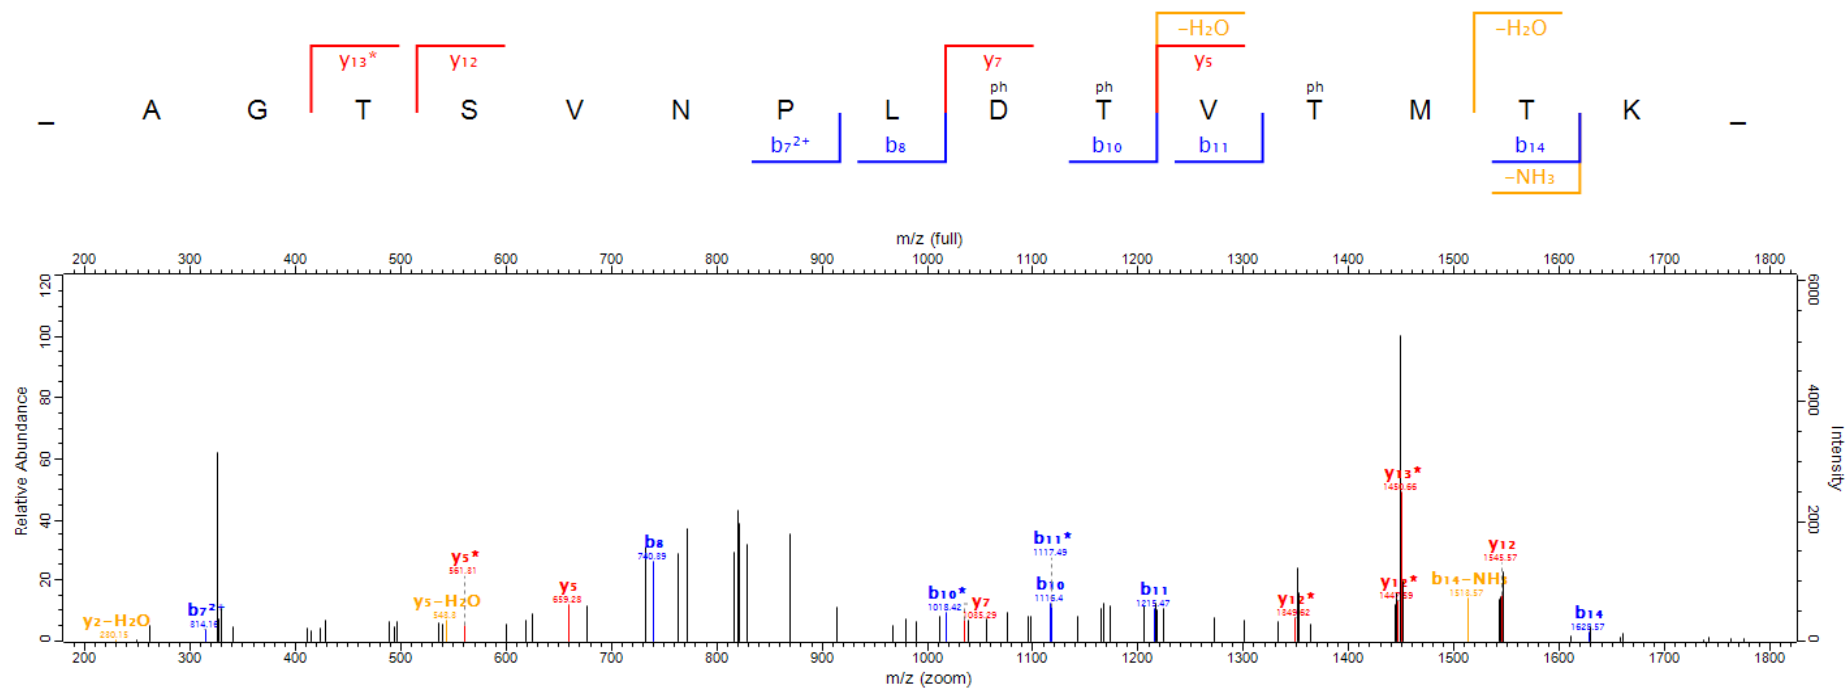

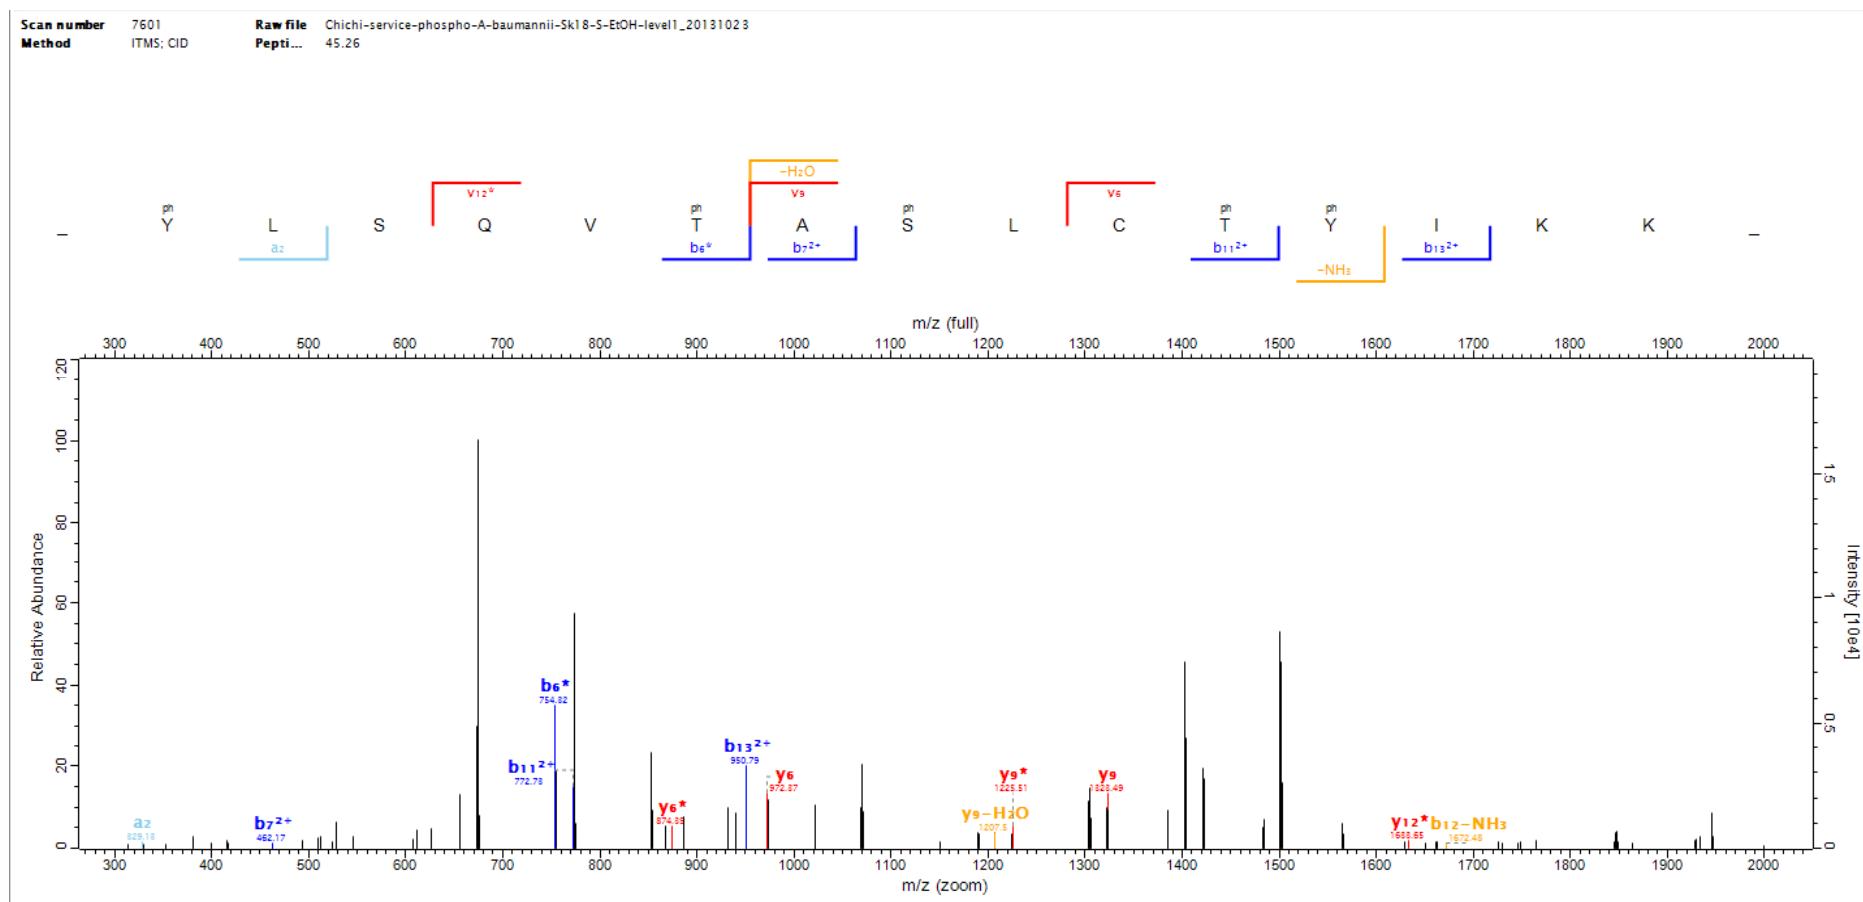

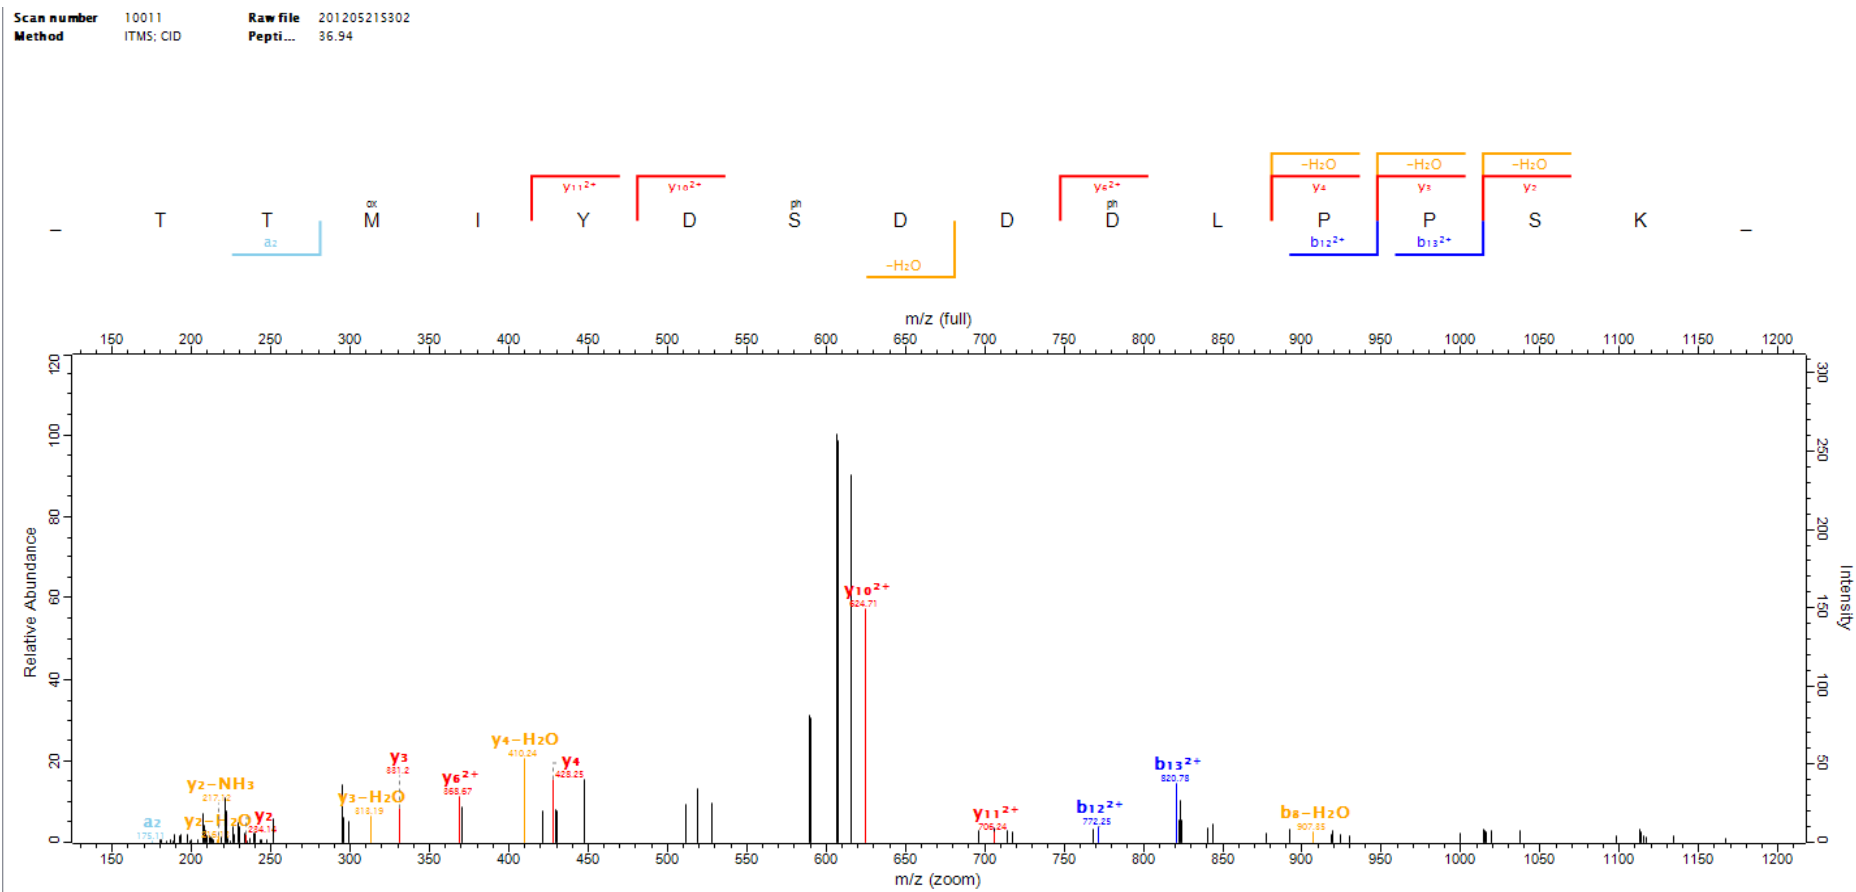

121-1

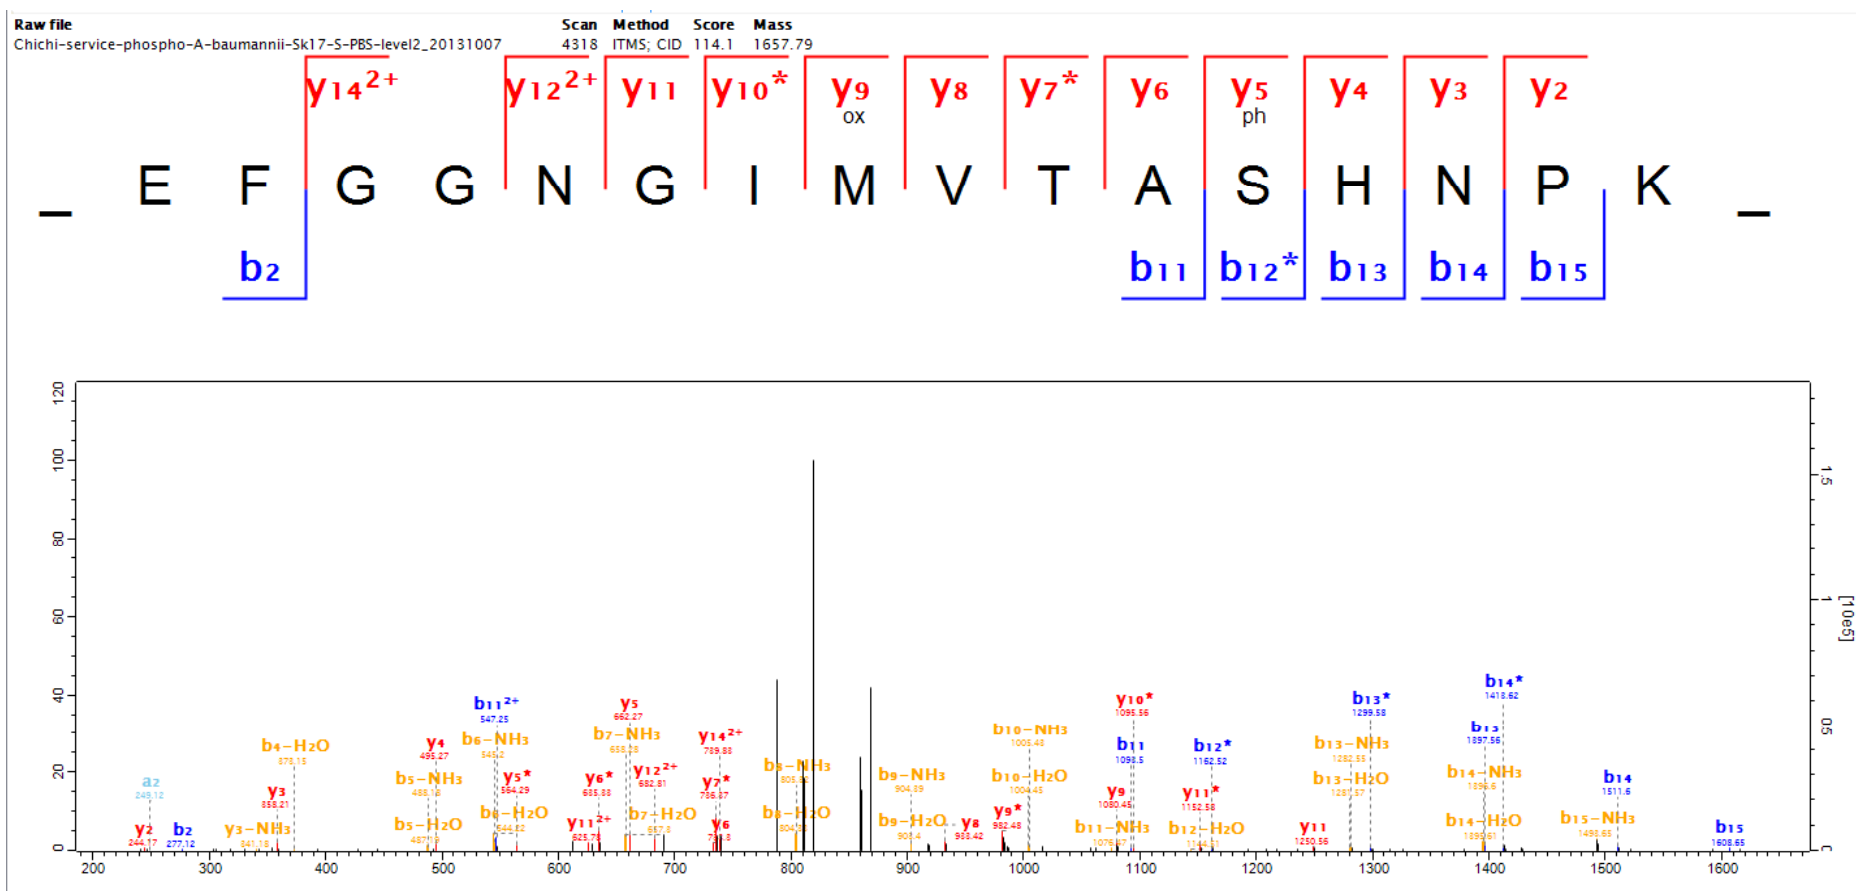



121-2

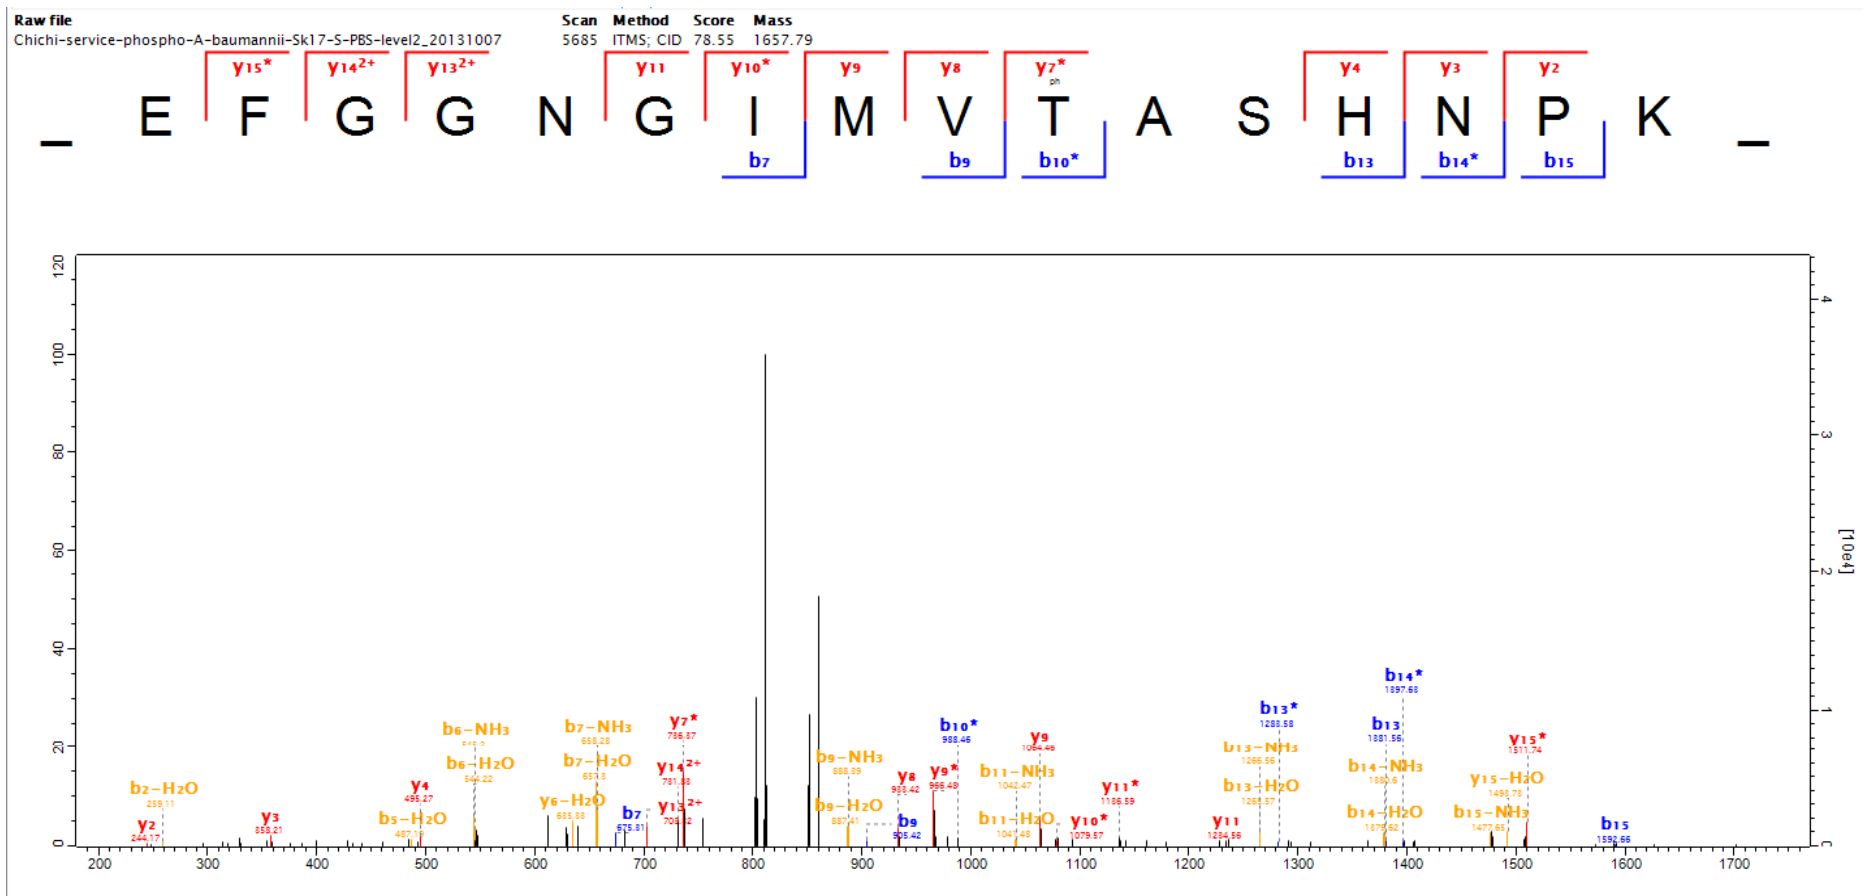

Scan number 14446 Raw file Chichi-service-phospho-A-baumannii-Sk17-S-EtOH-level1\_20131023  
 Method ITMS: CID Pepti... 74.51

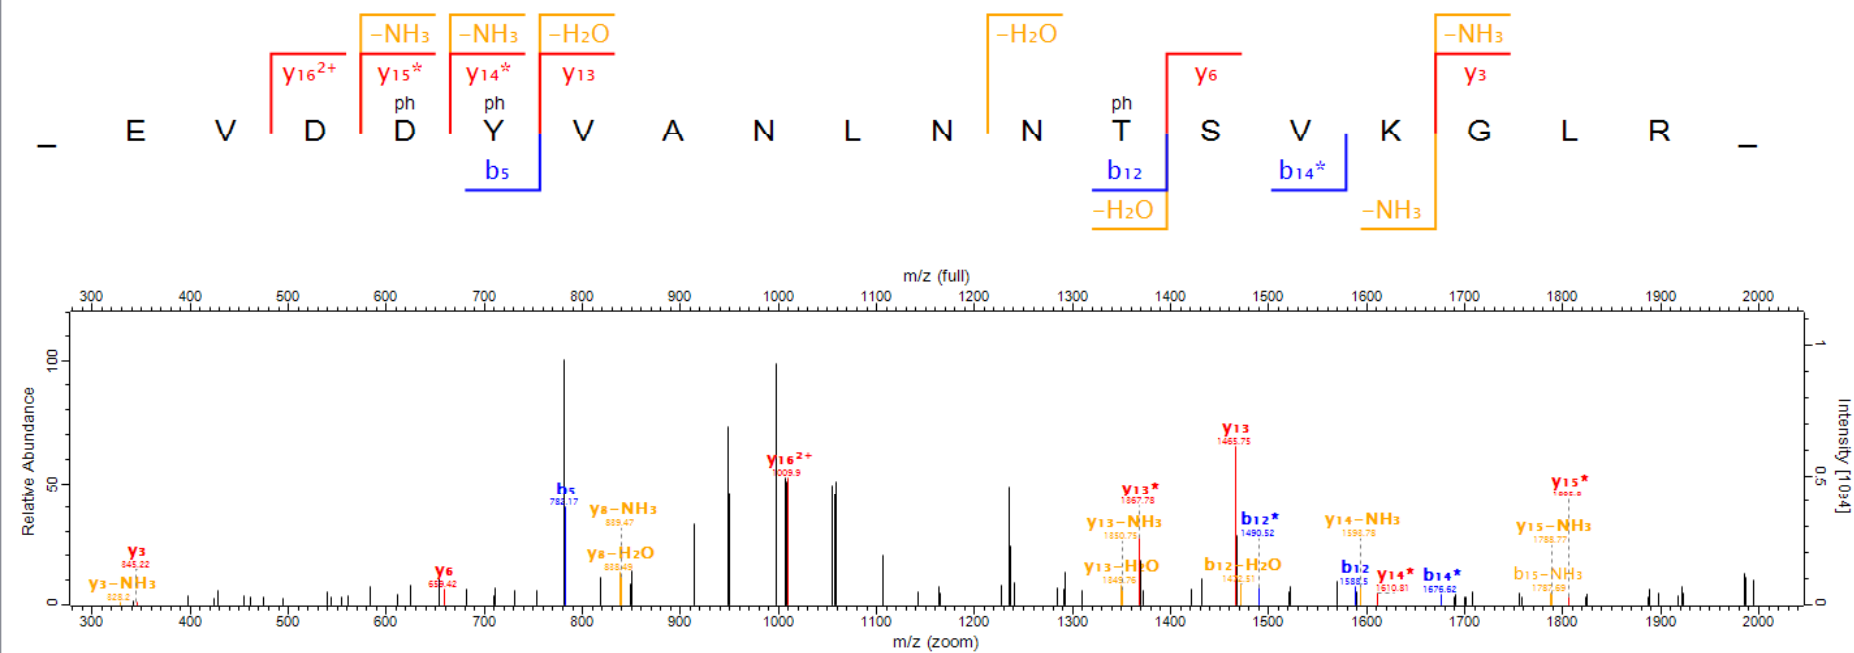

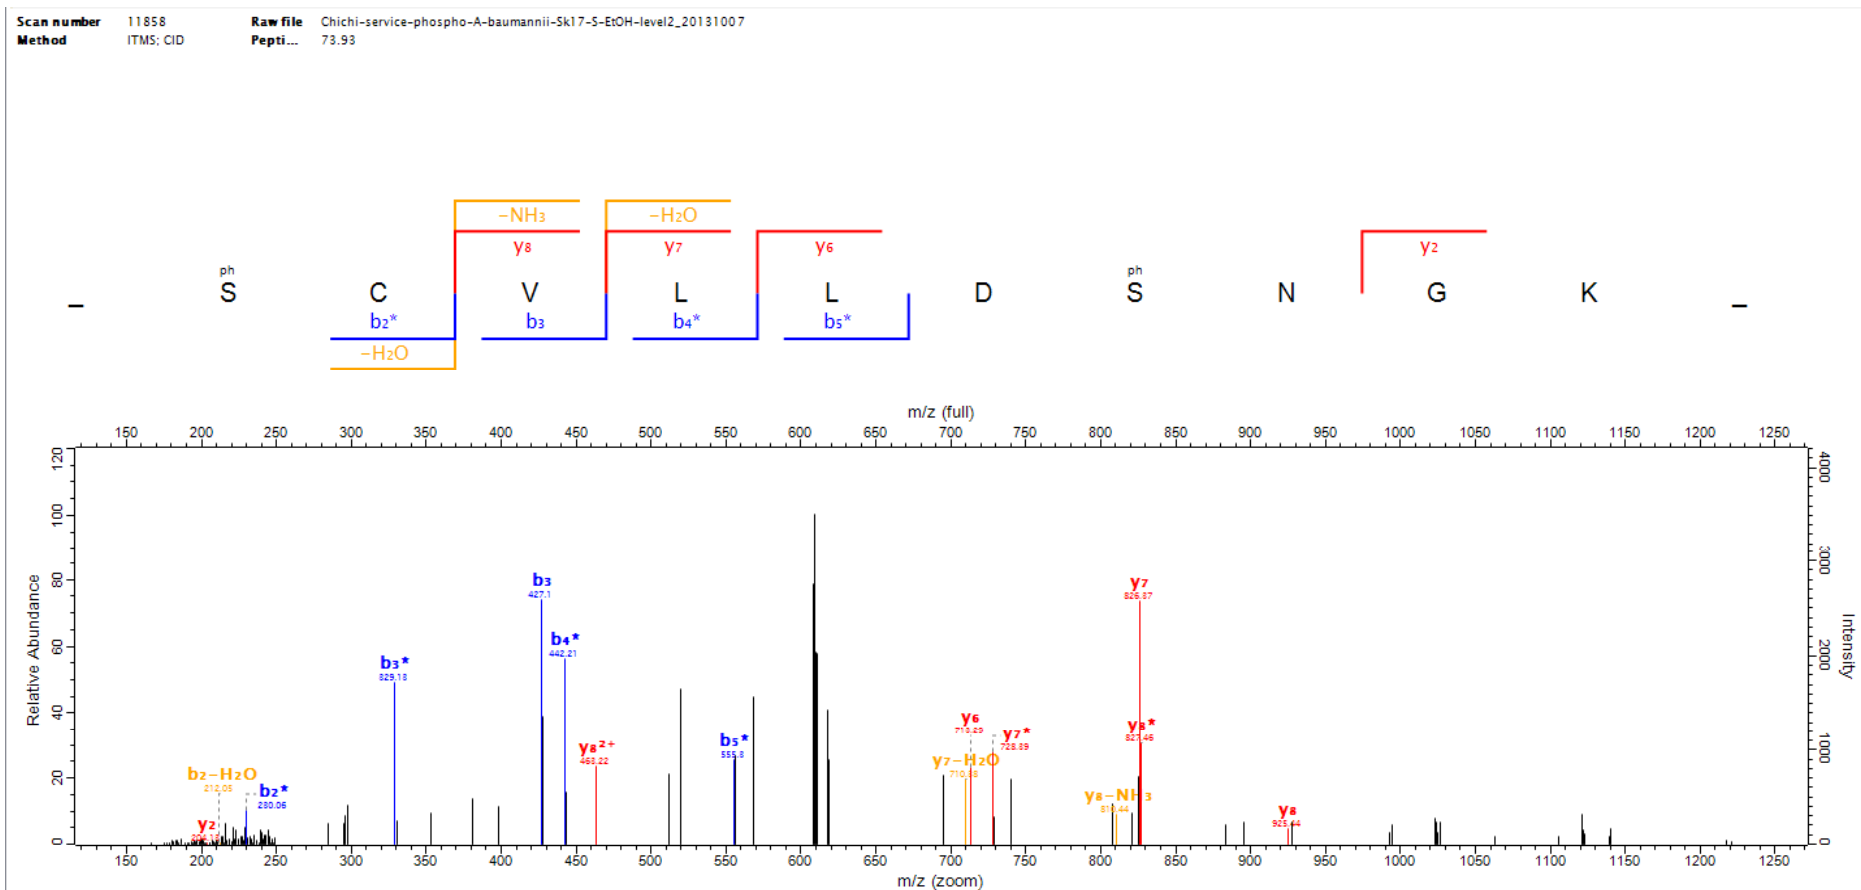

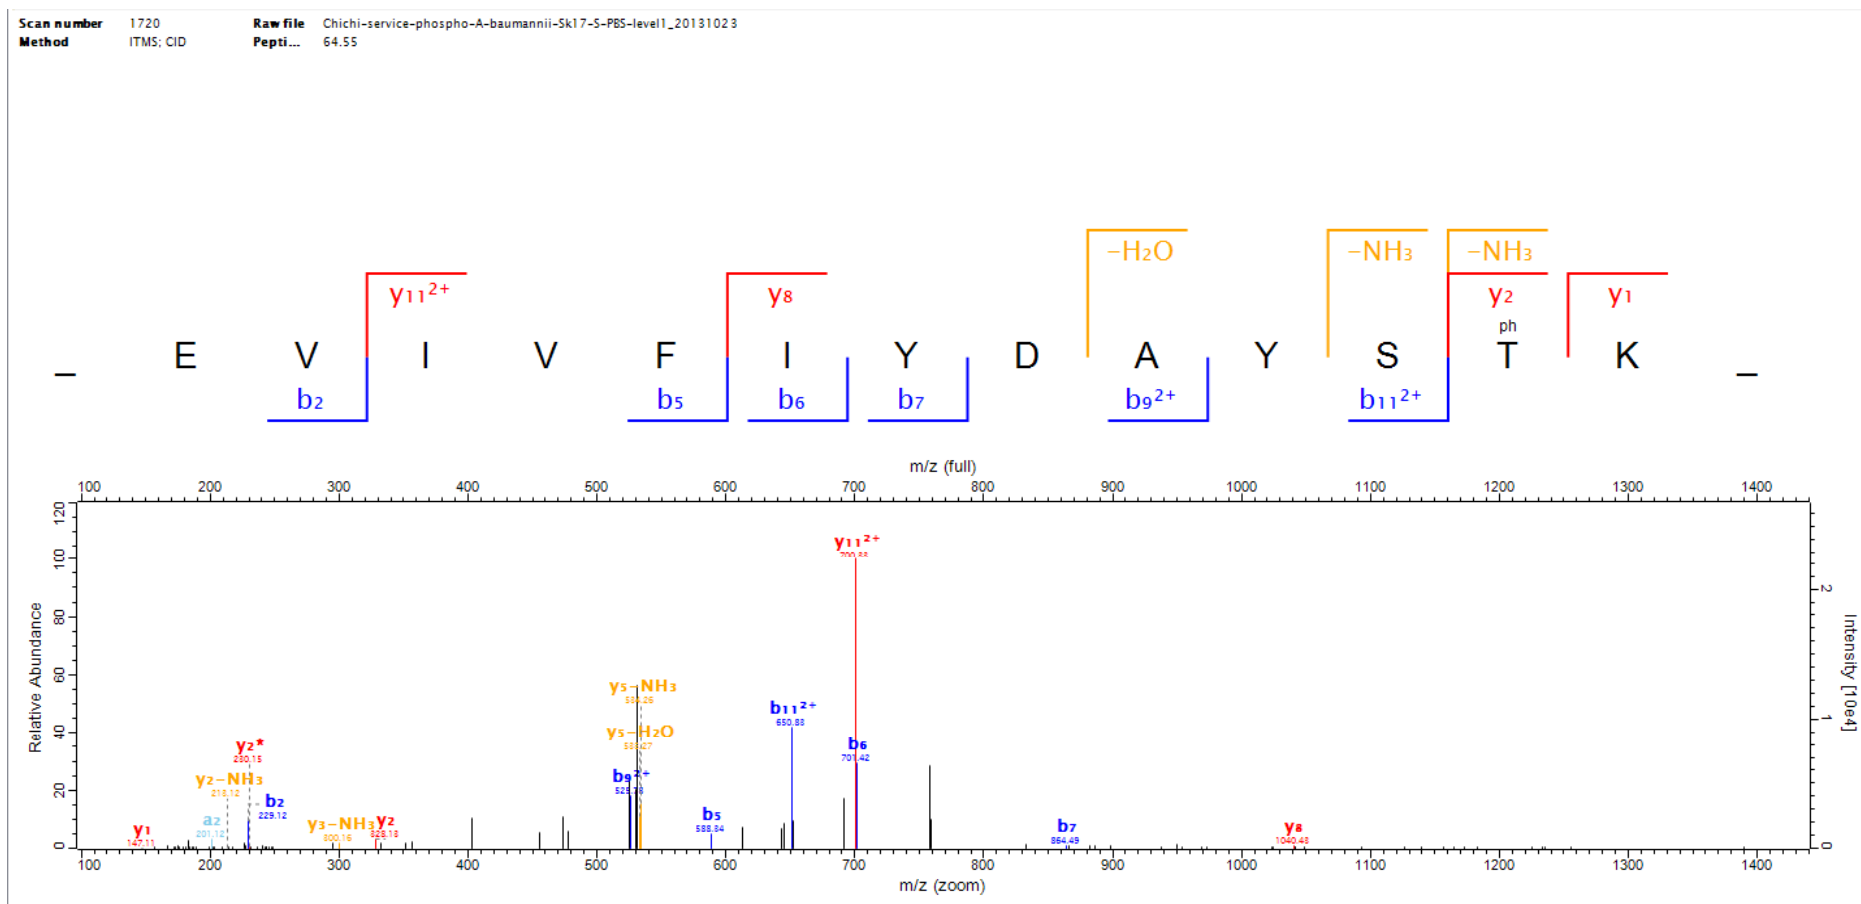



Scan number 1737 Raw file Chichi-service-phospho-A-baumannii-Sk17-5-EtOH-level2\_20131007  
 Method ITMS; CID Pepti... 33.55

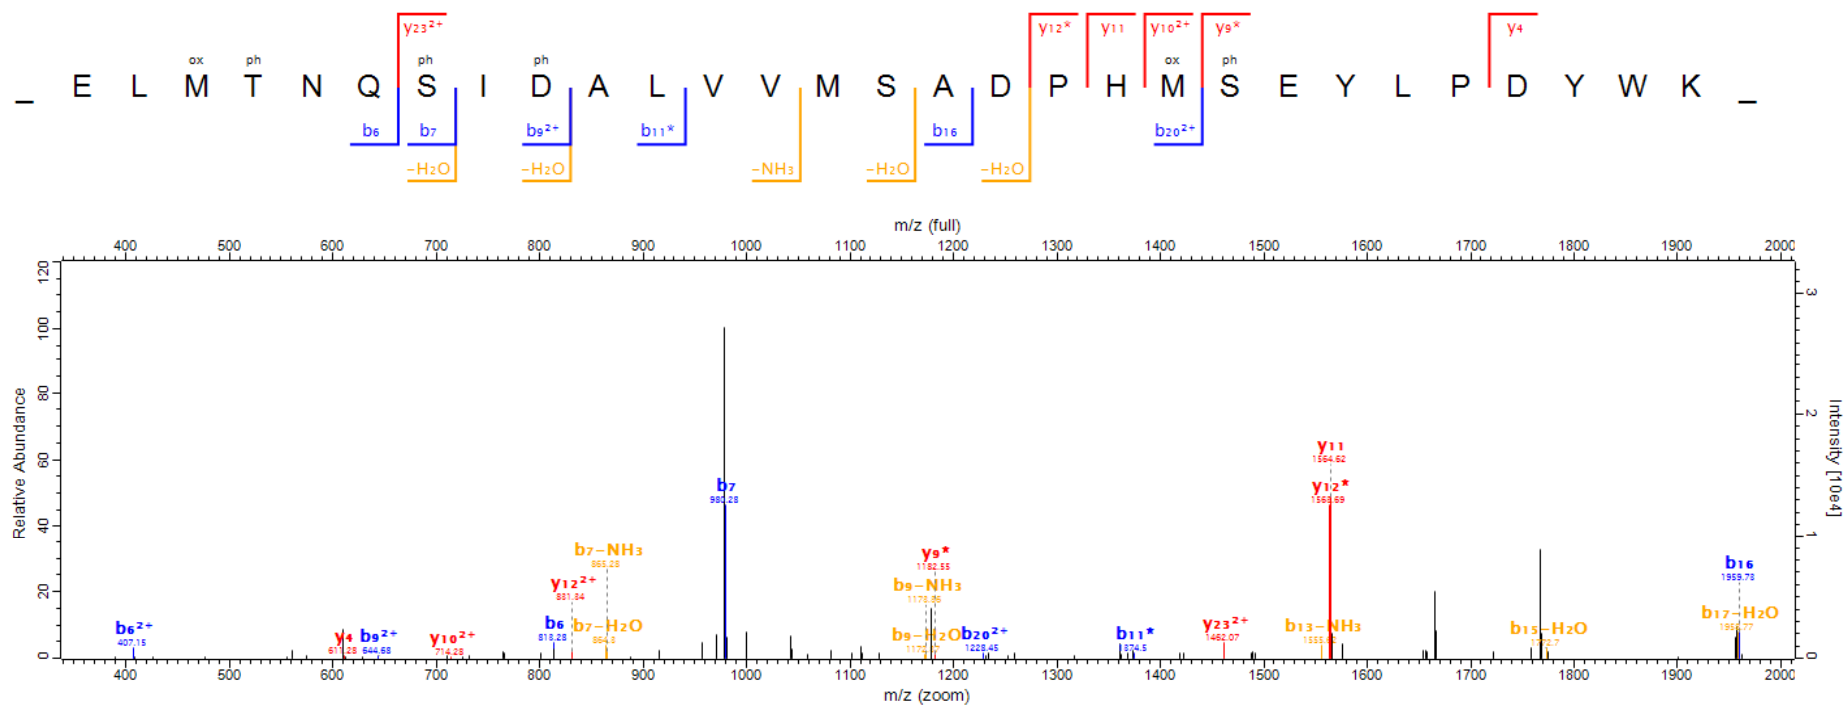

Scan number 6530 Raw file Chichi-service-phospho-A-baumannii-Sk17-5-EtOH-level1\_20131023  
 Method ITMS; CID Pepti... 46.25

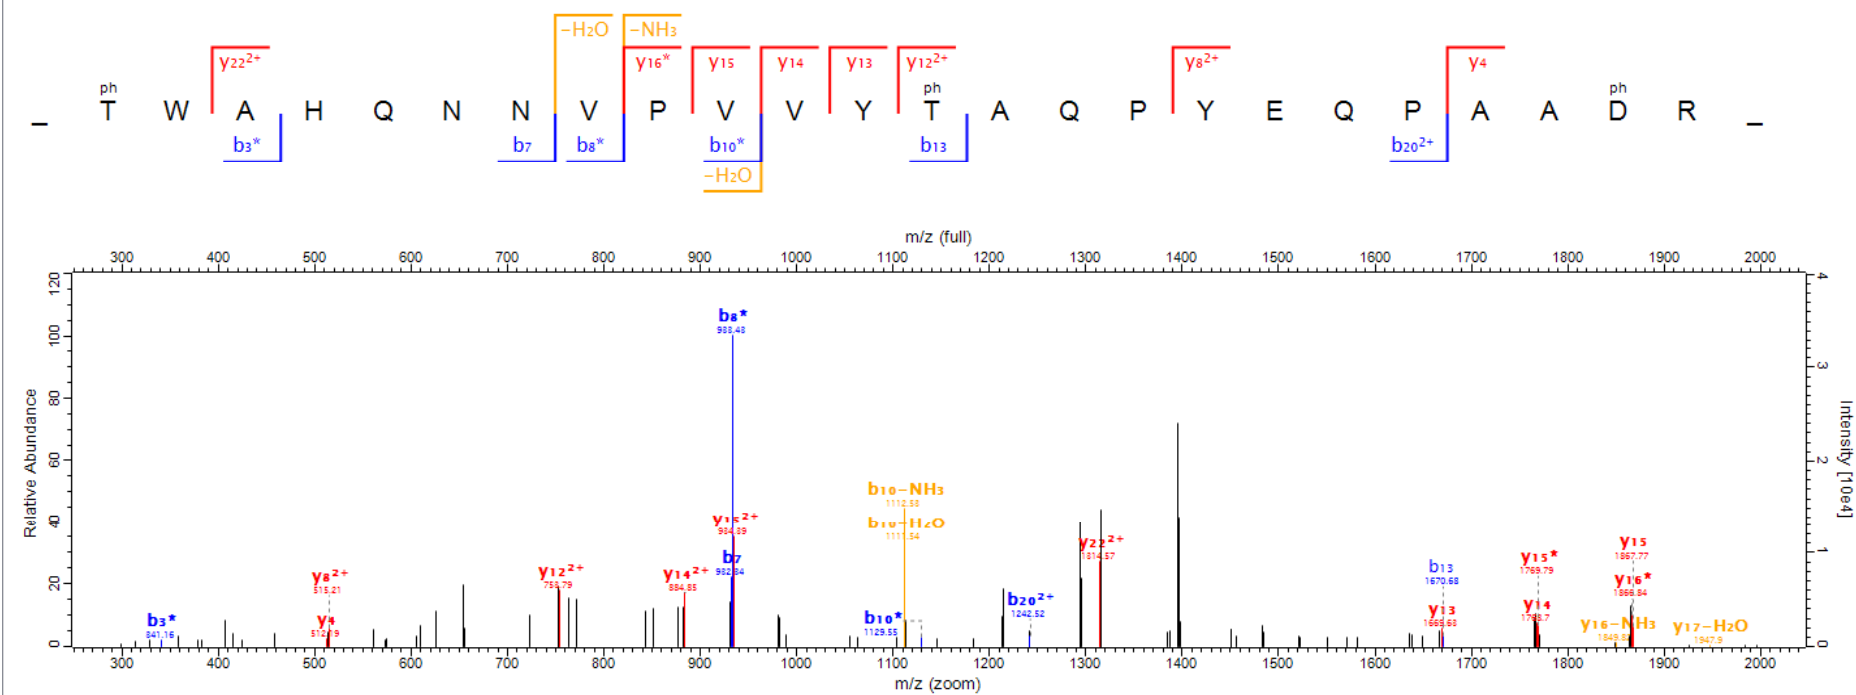

Scan number 5614 Raw file Chichi-service-phospho-A-baumannii-Sk18-S-EtOH-level1\_20131023  
 Method ITMS; CID Pepti... 80.75

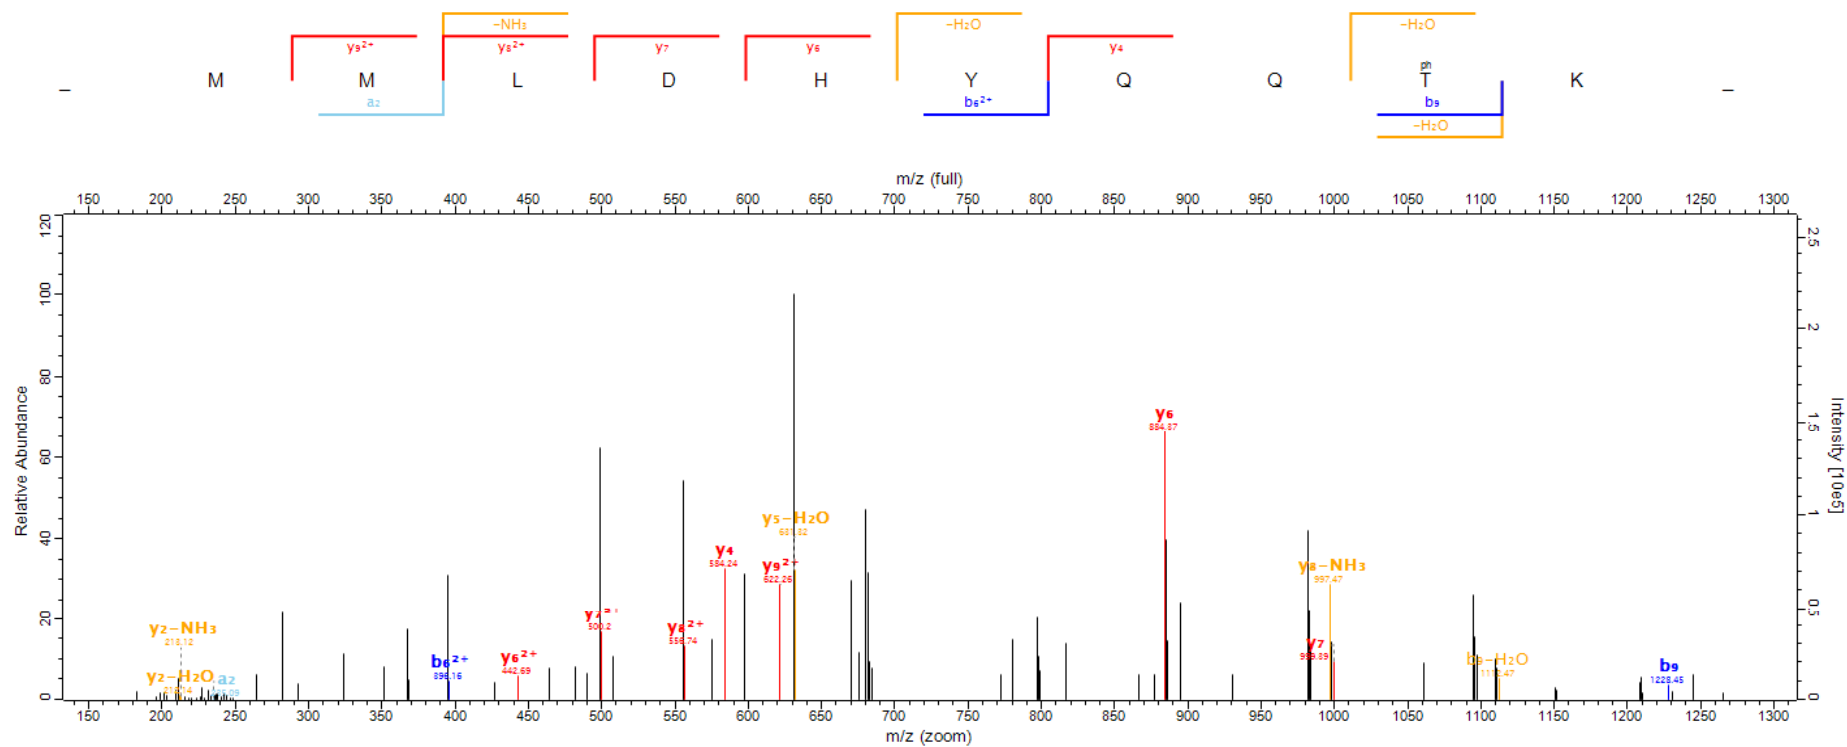



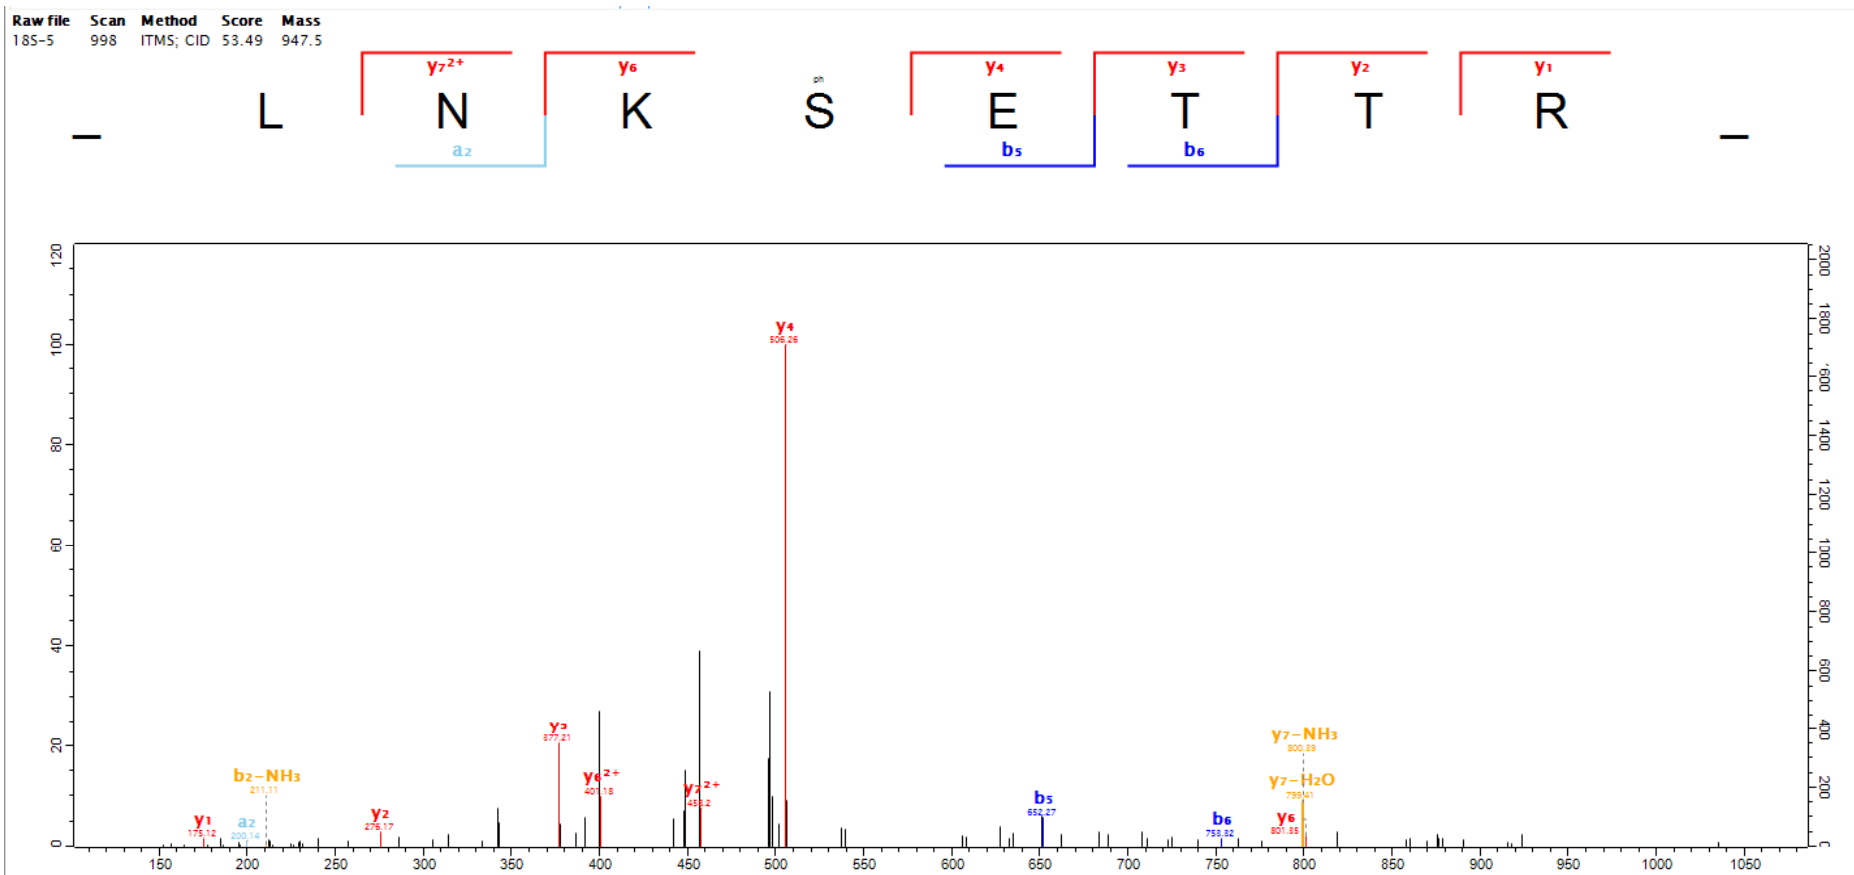

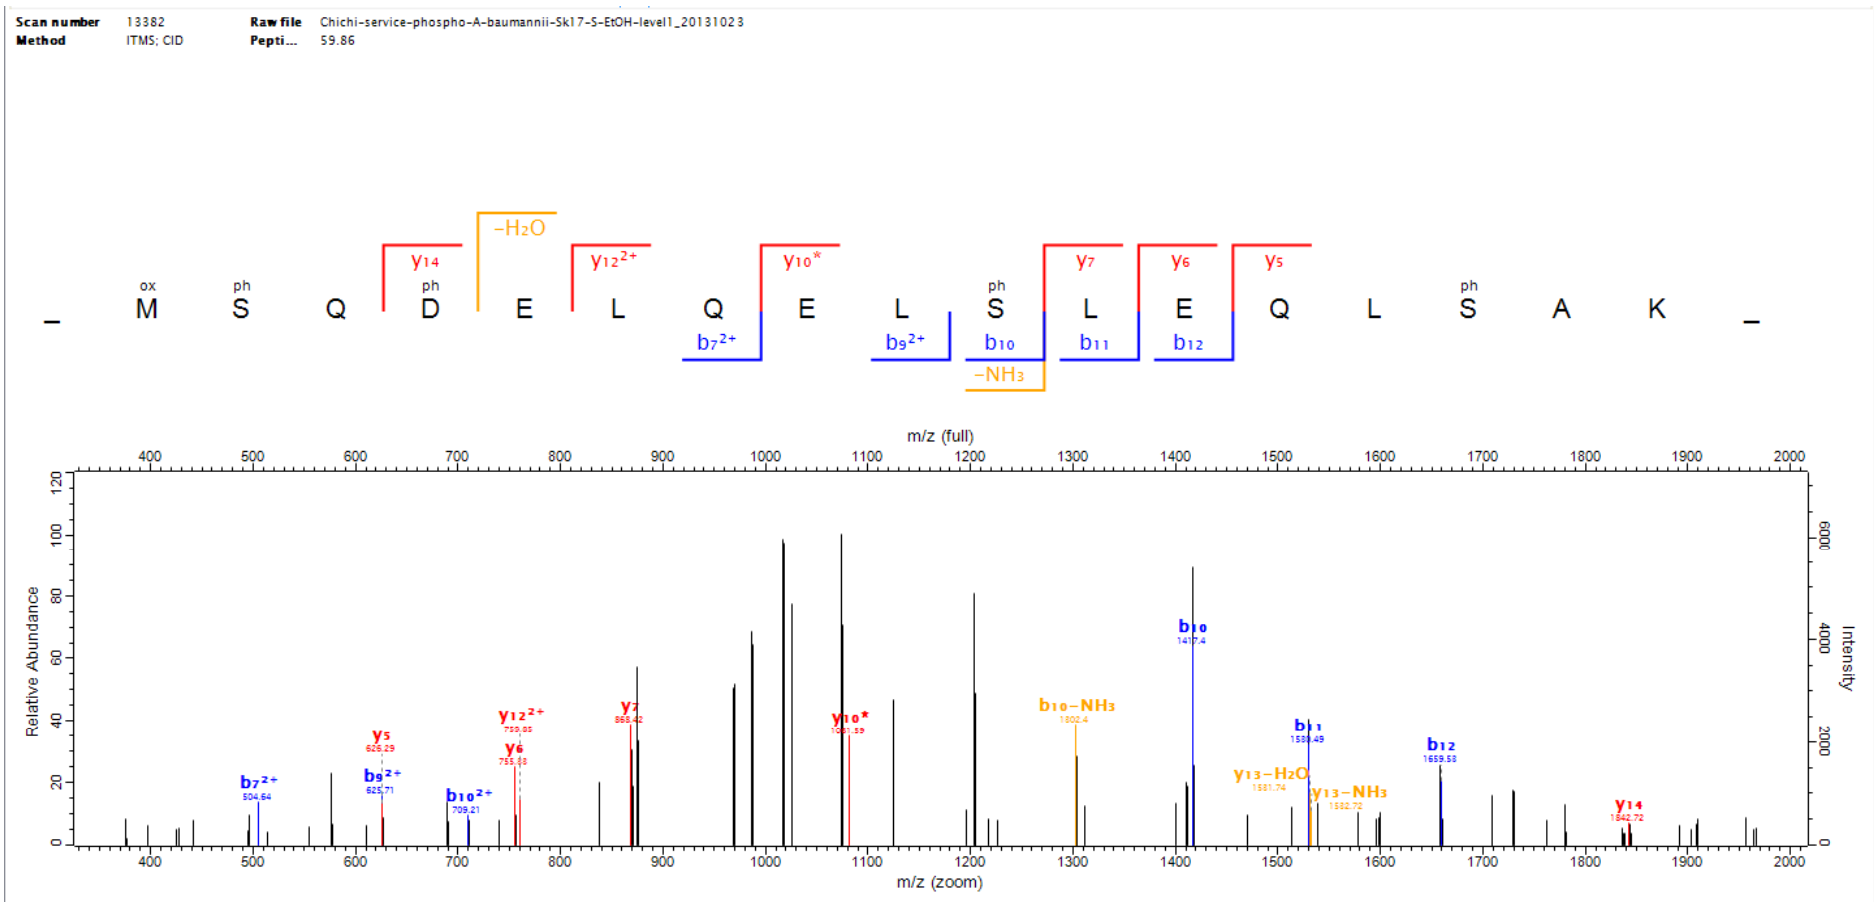

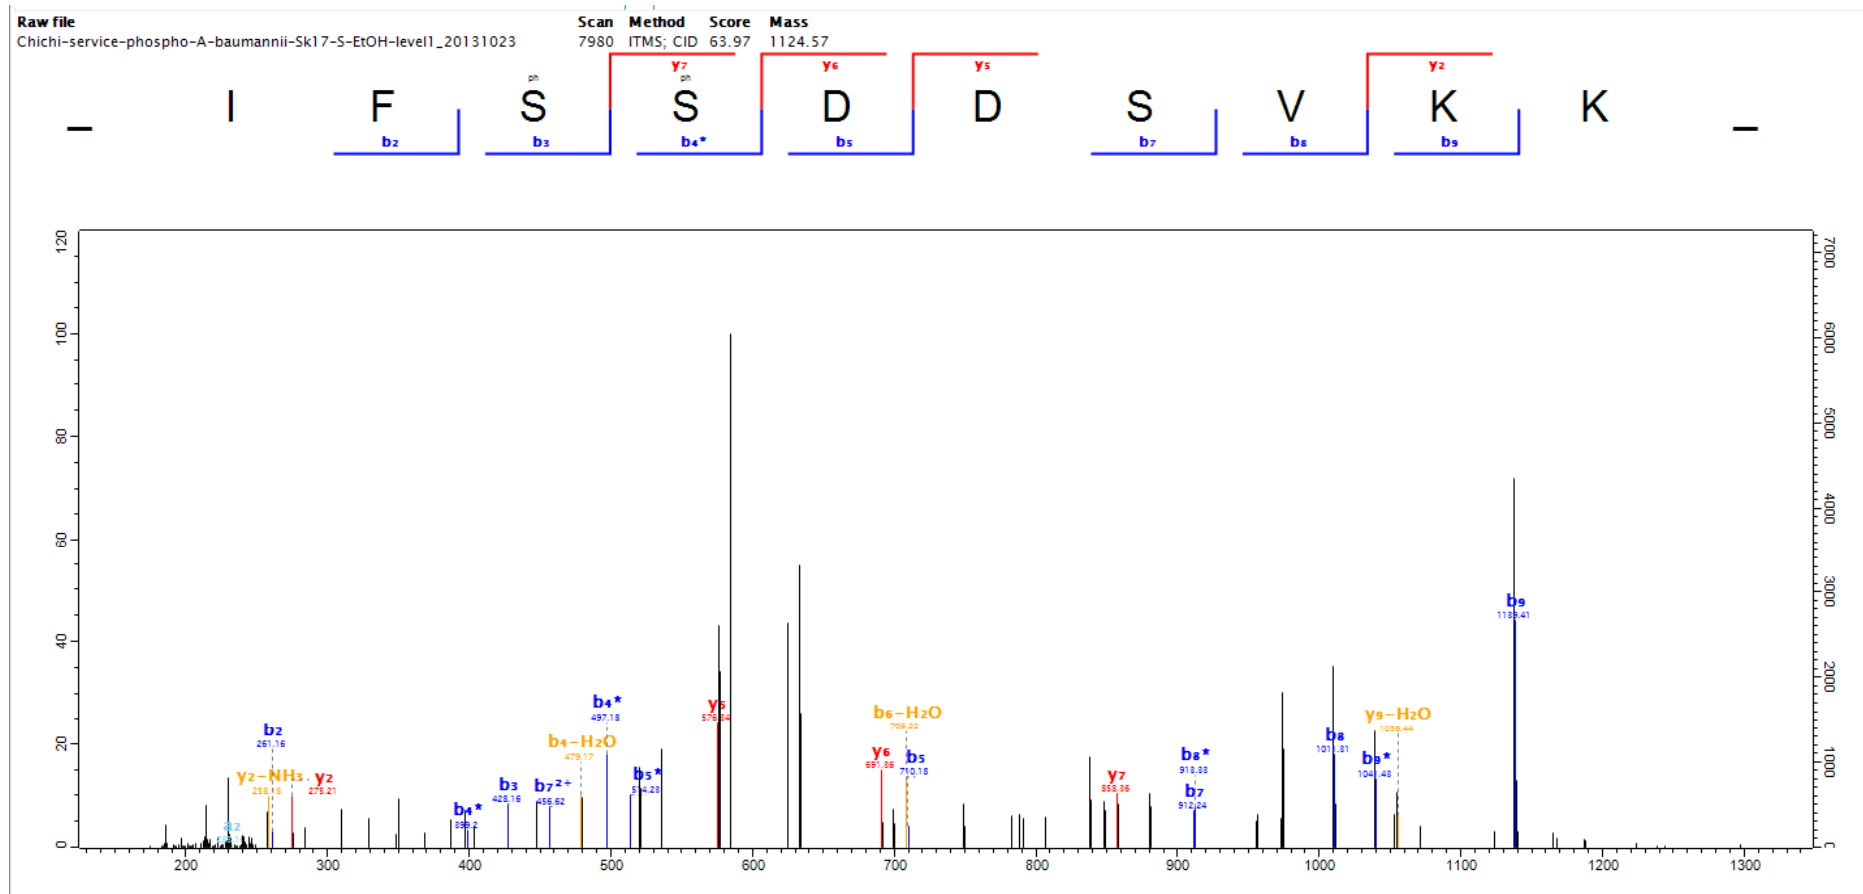

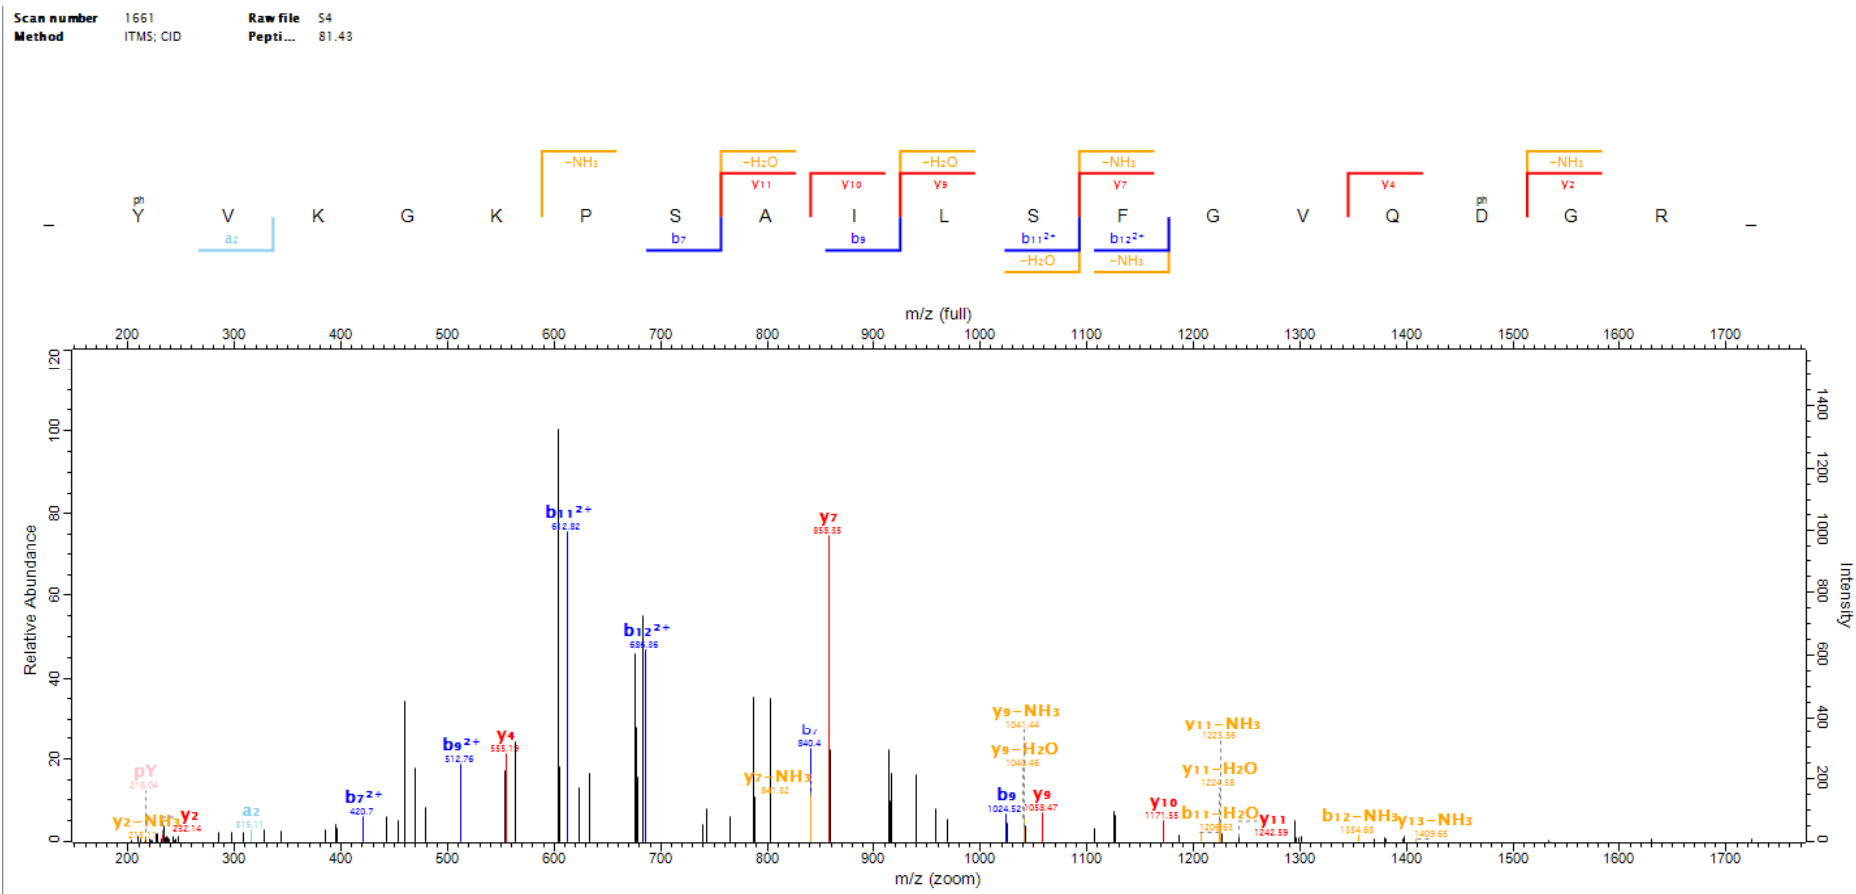

133

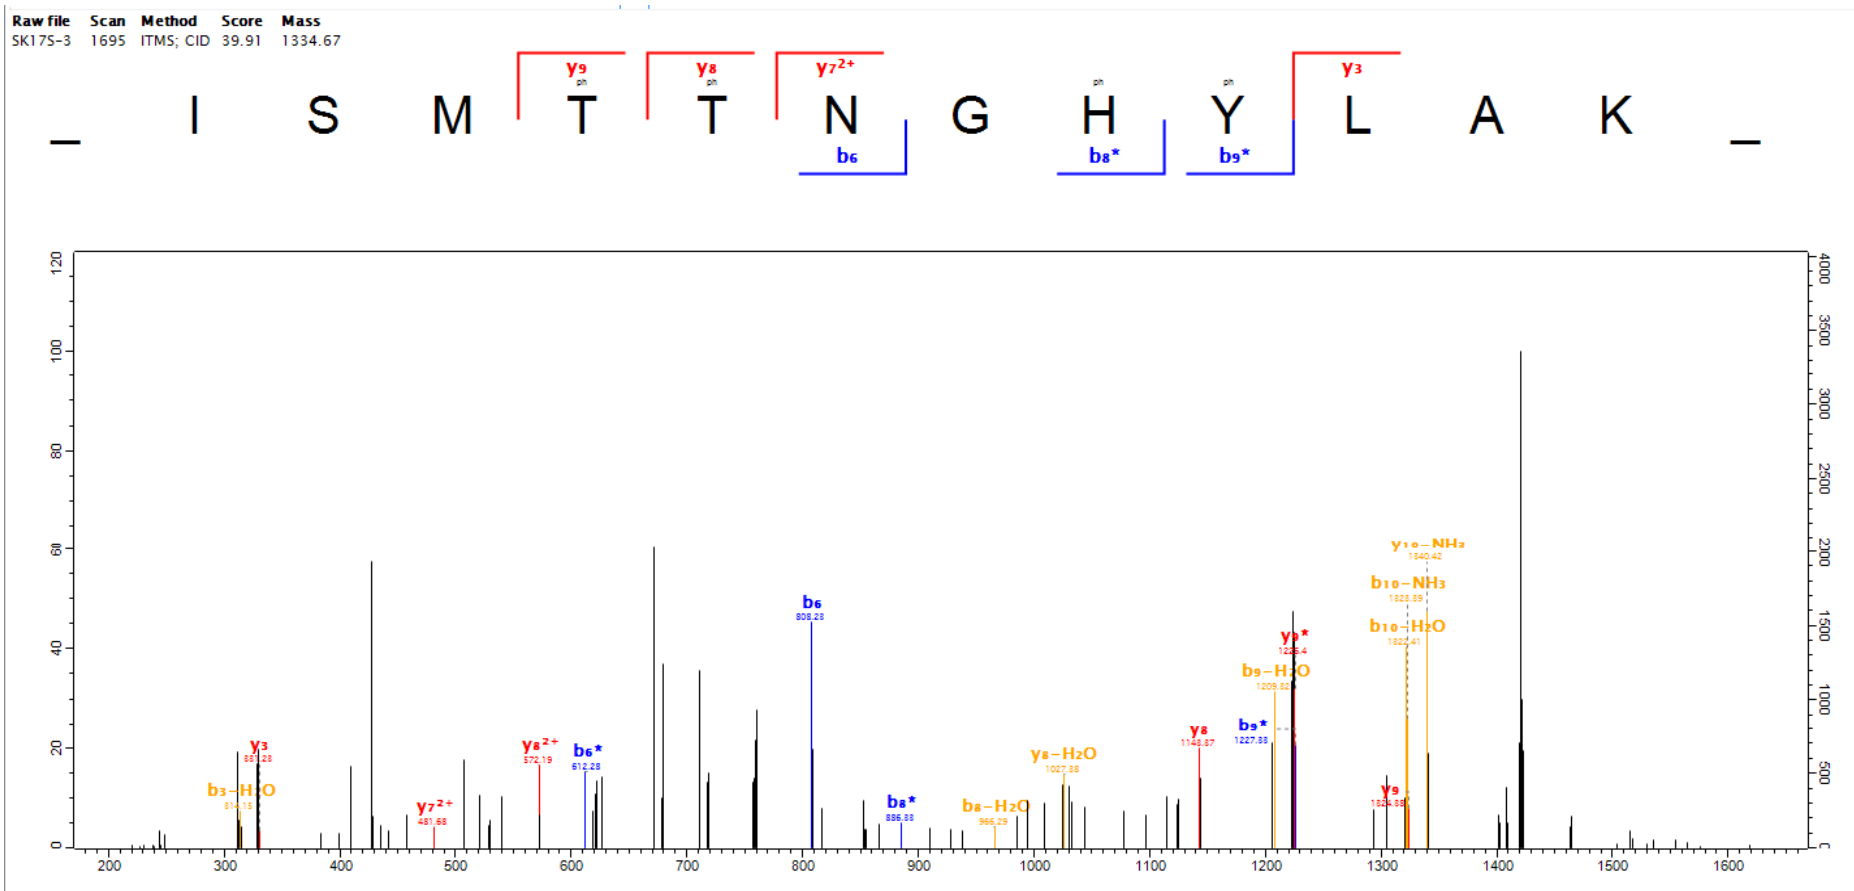

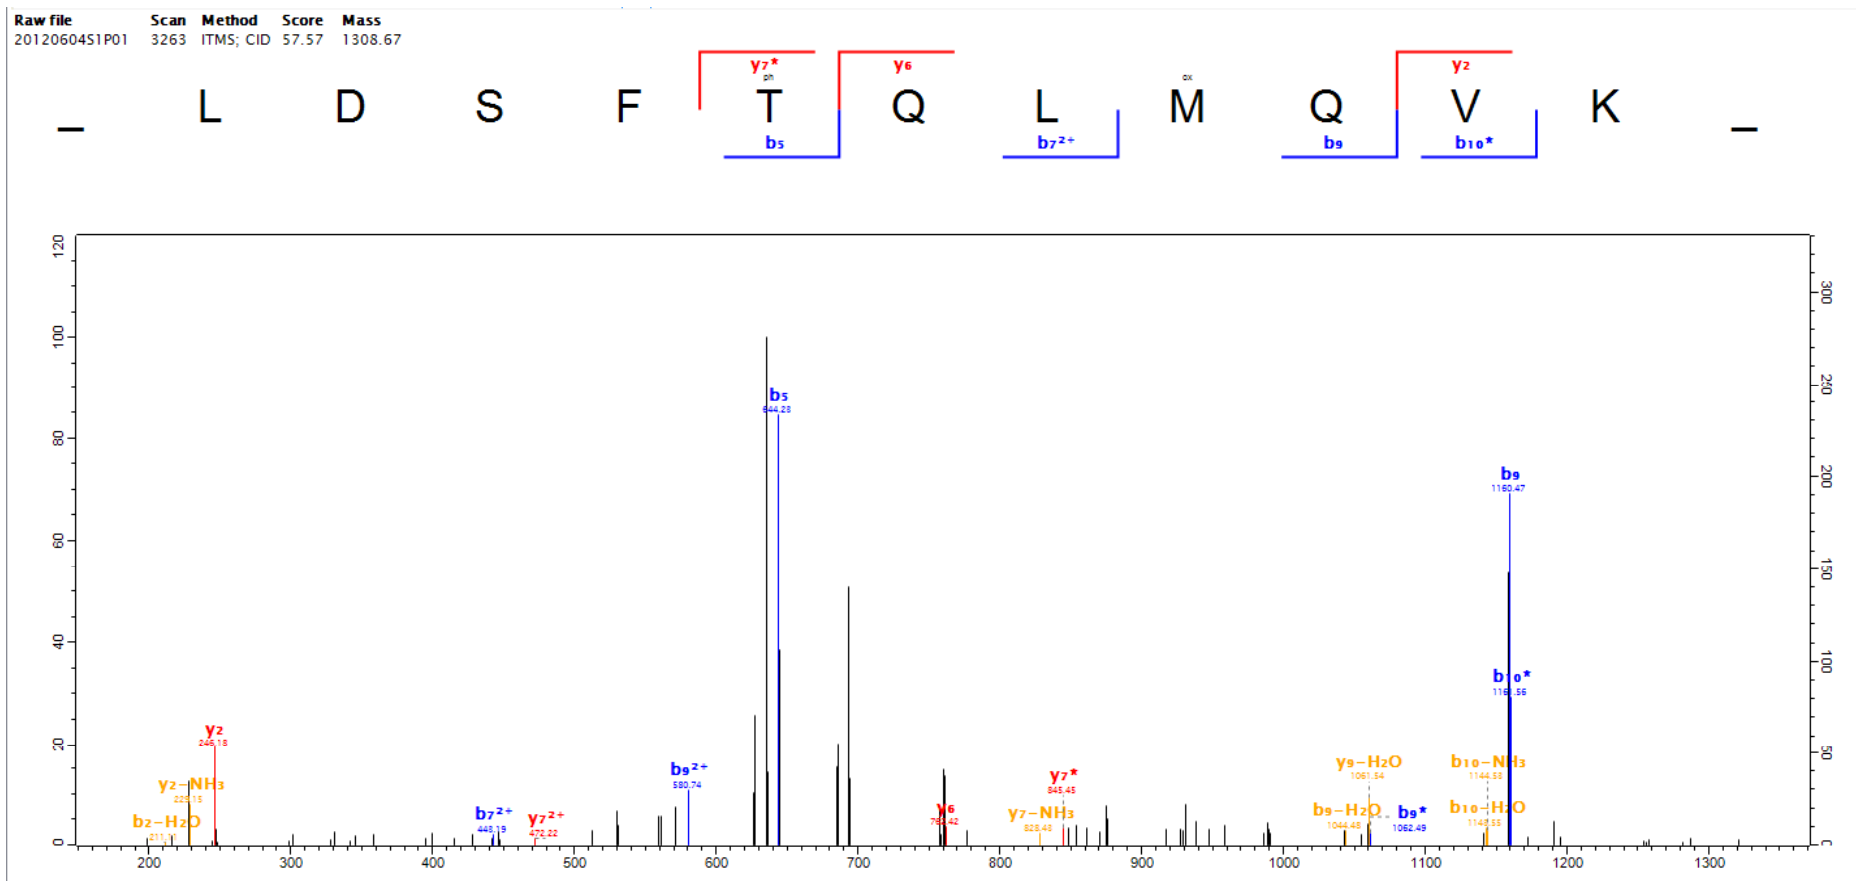

135-1

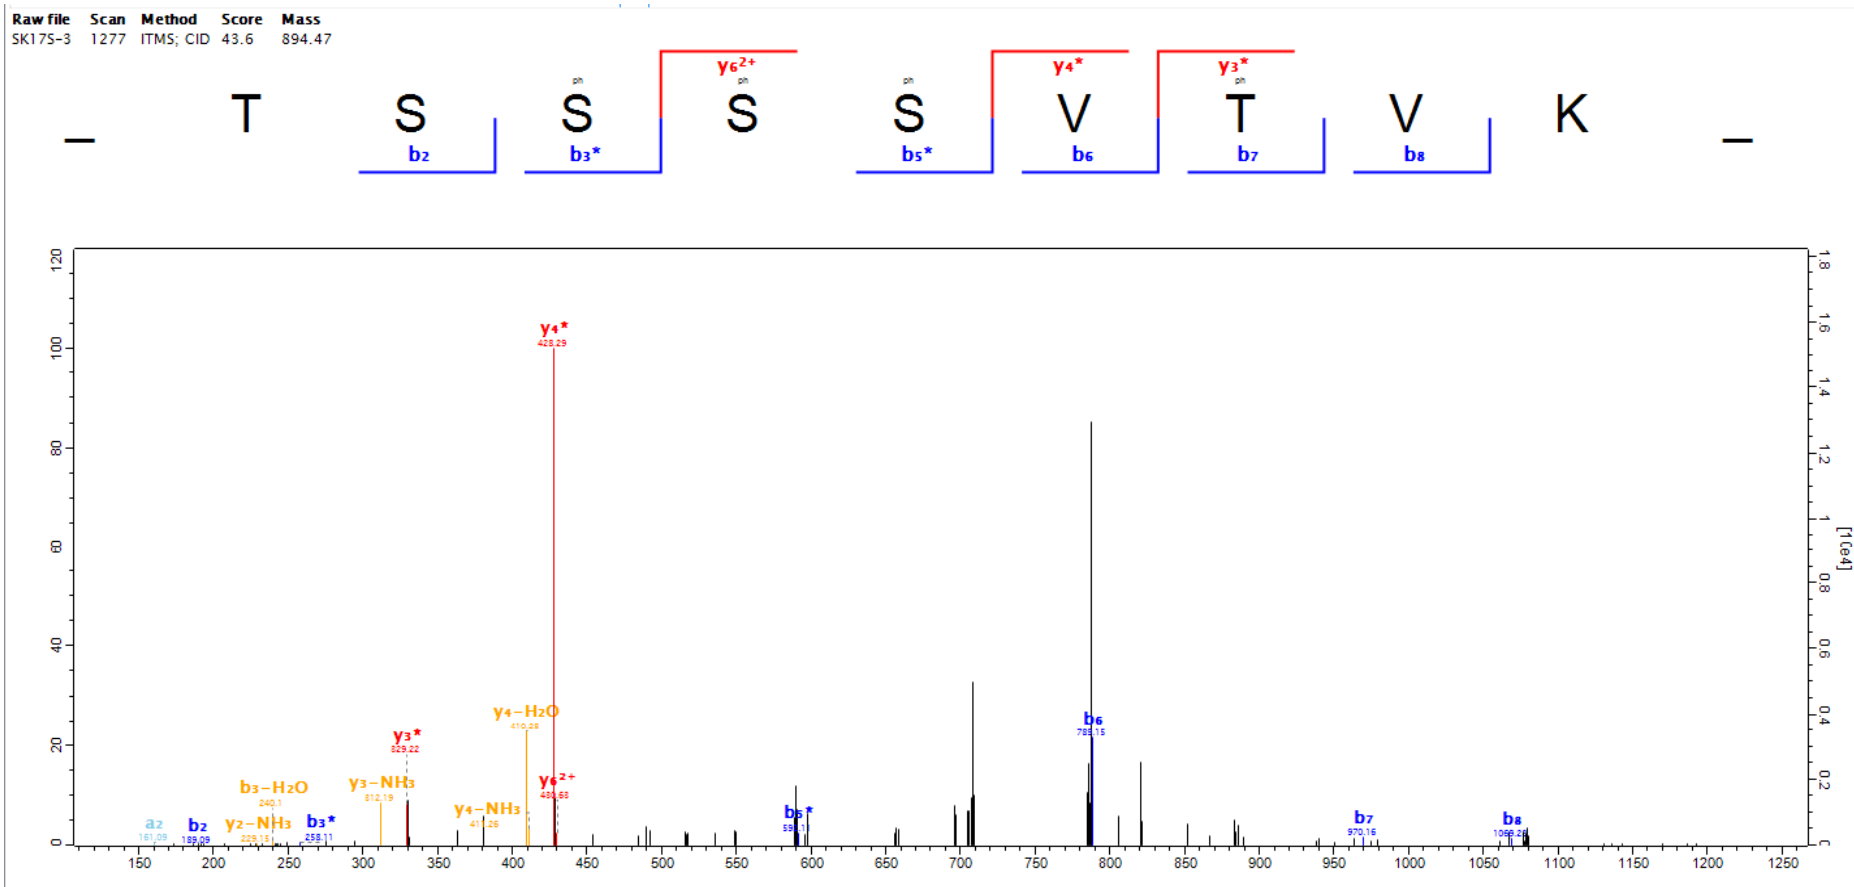

135-2

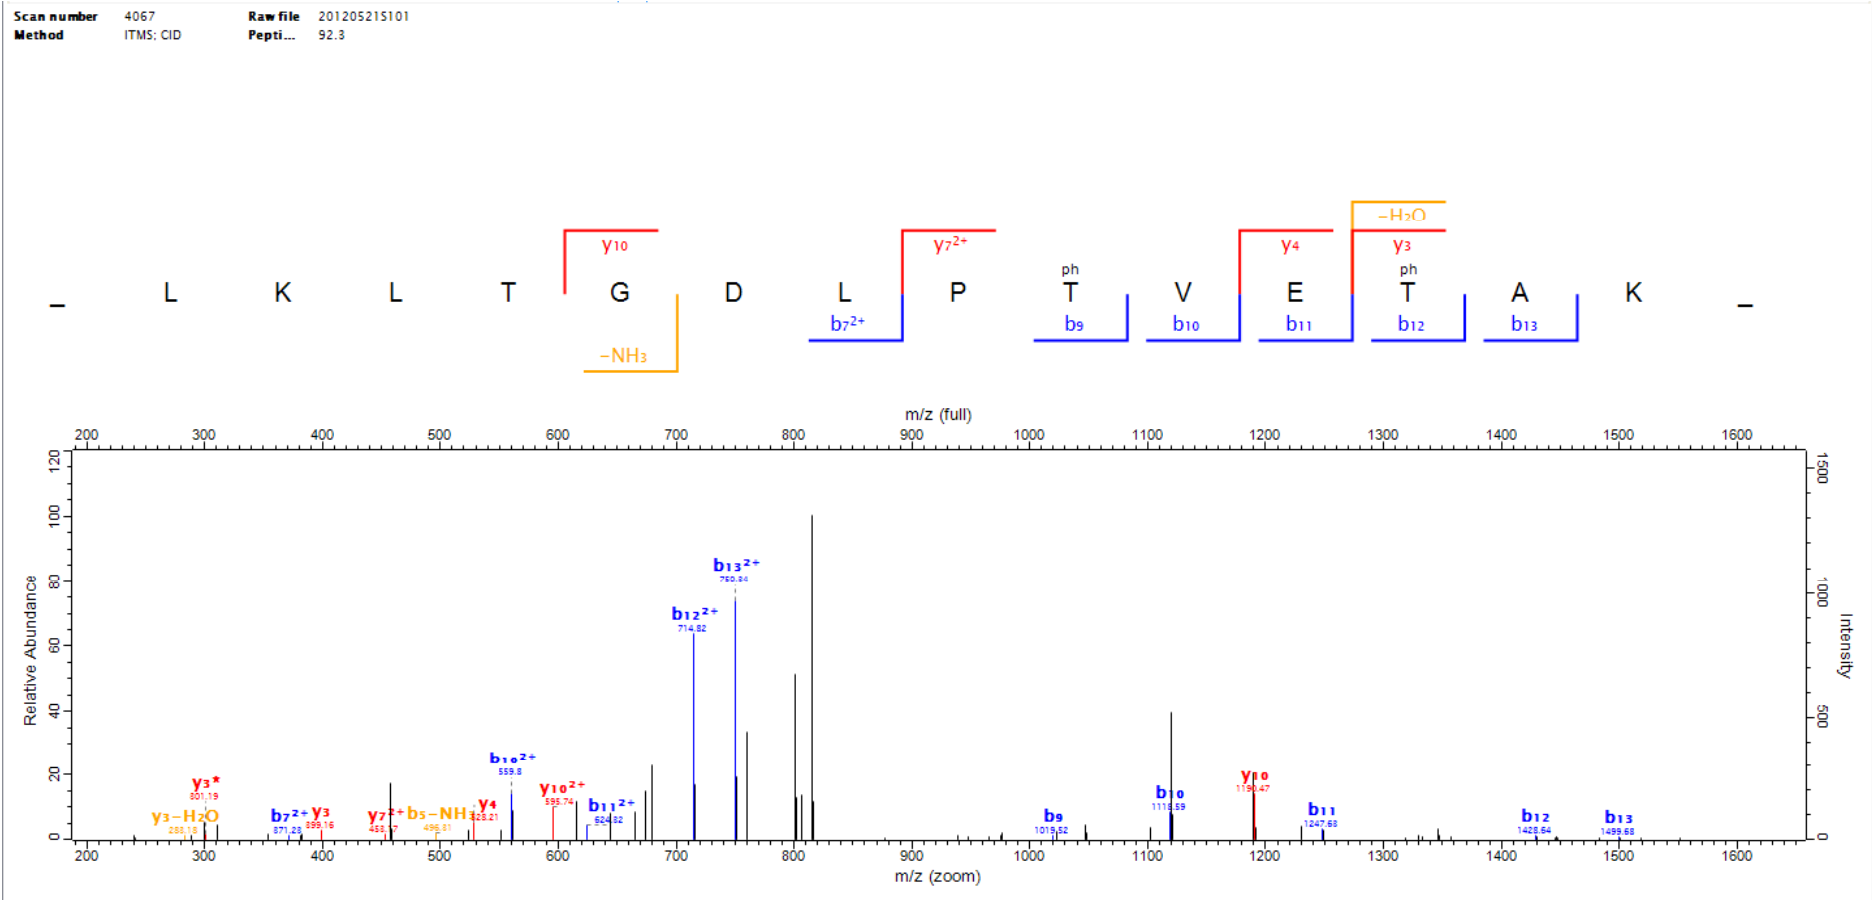



136-1

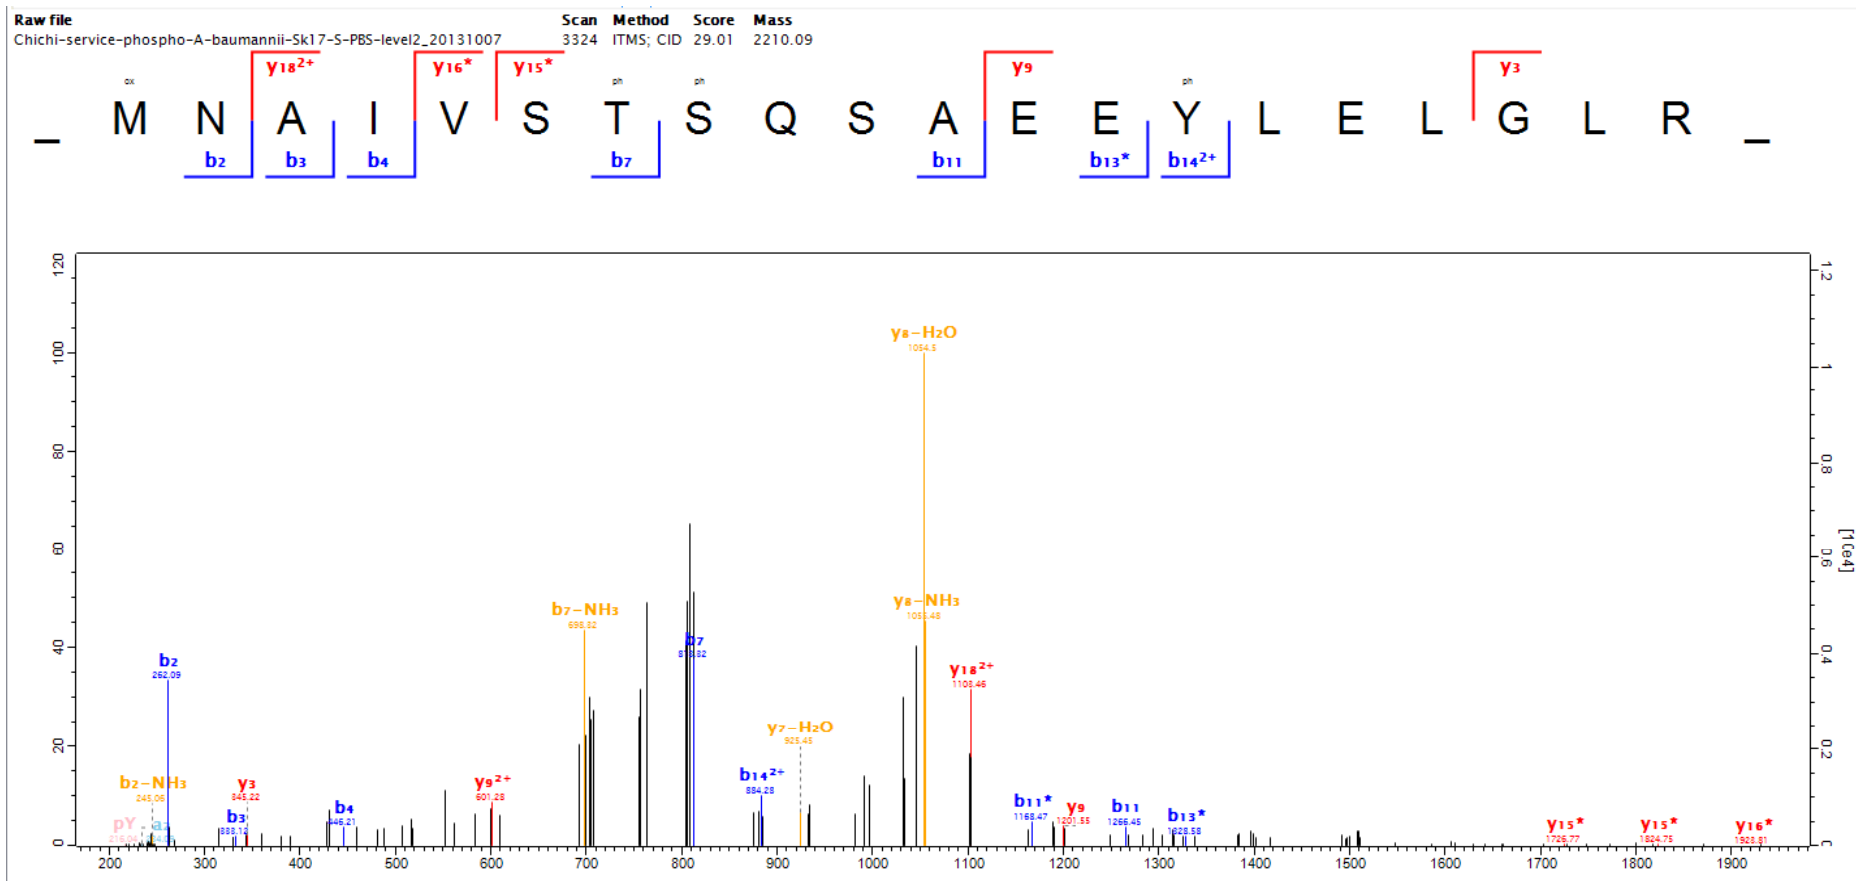

136-2

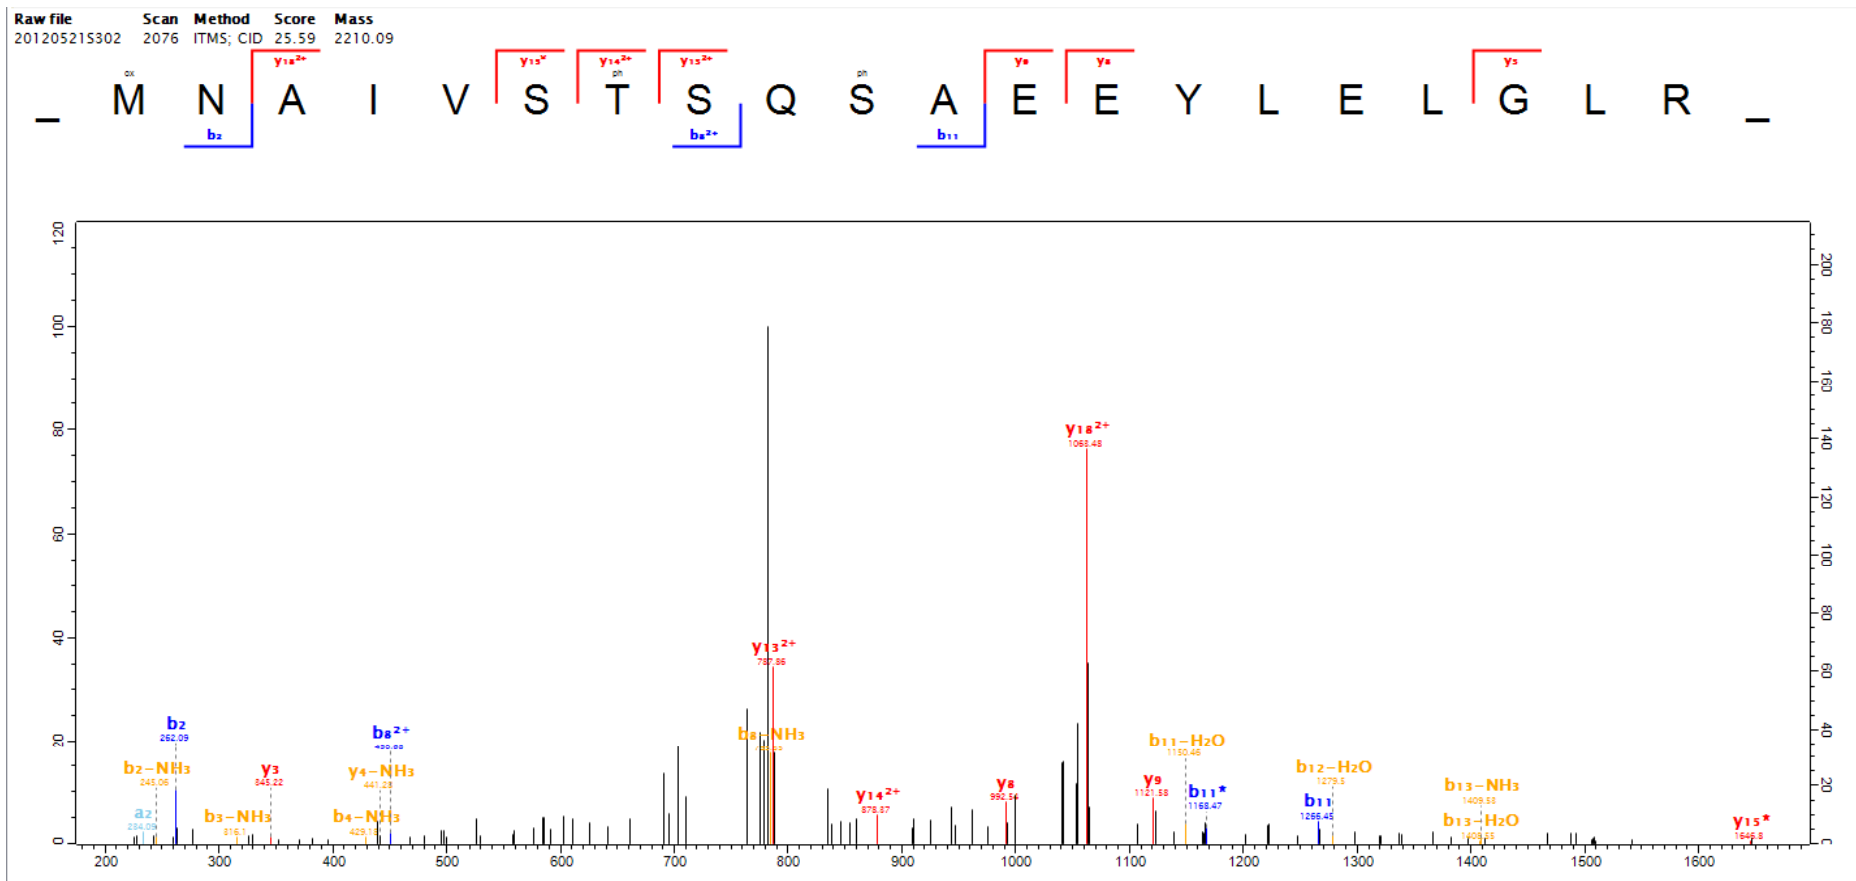

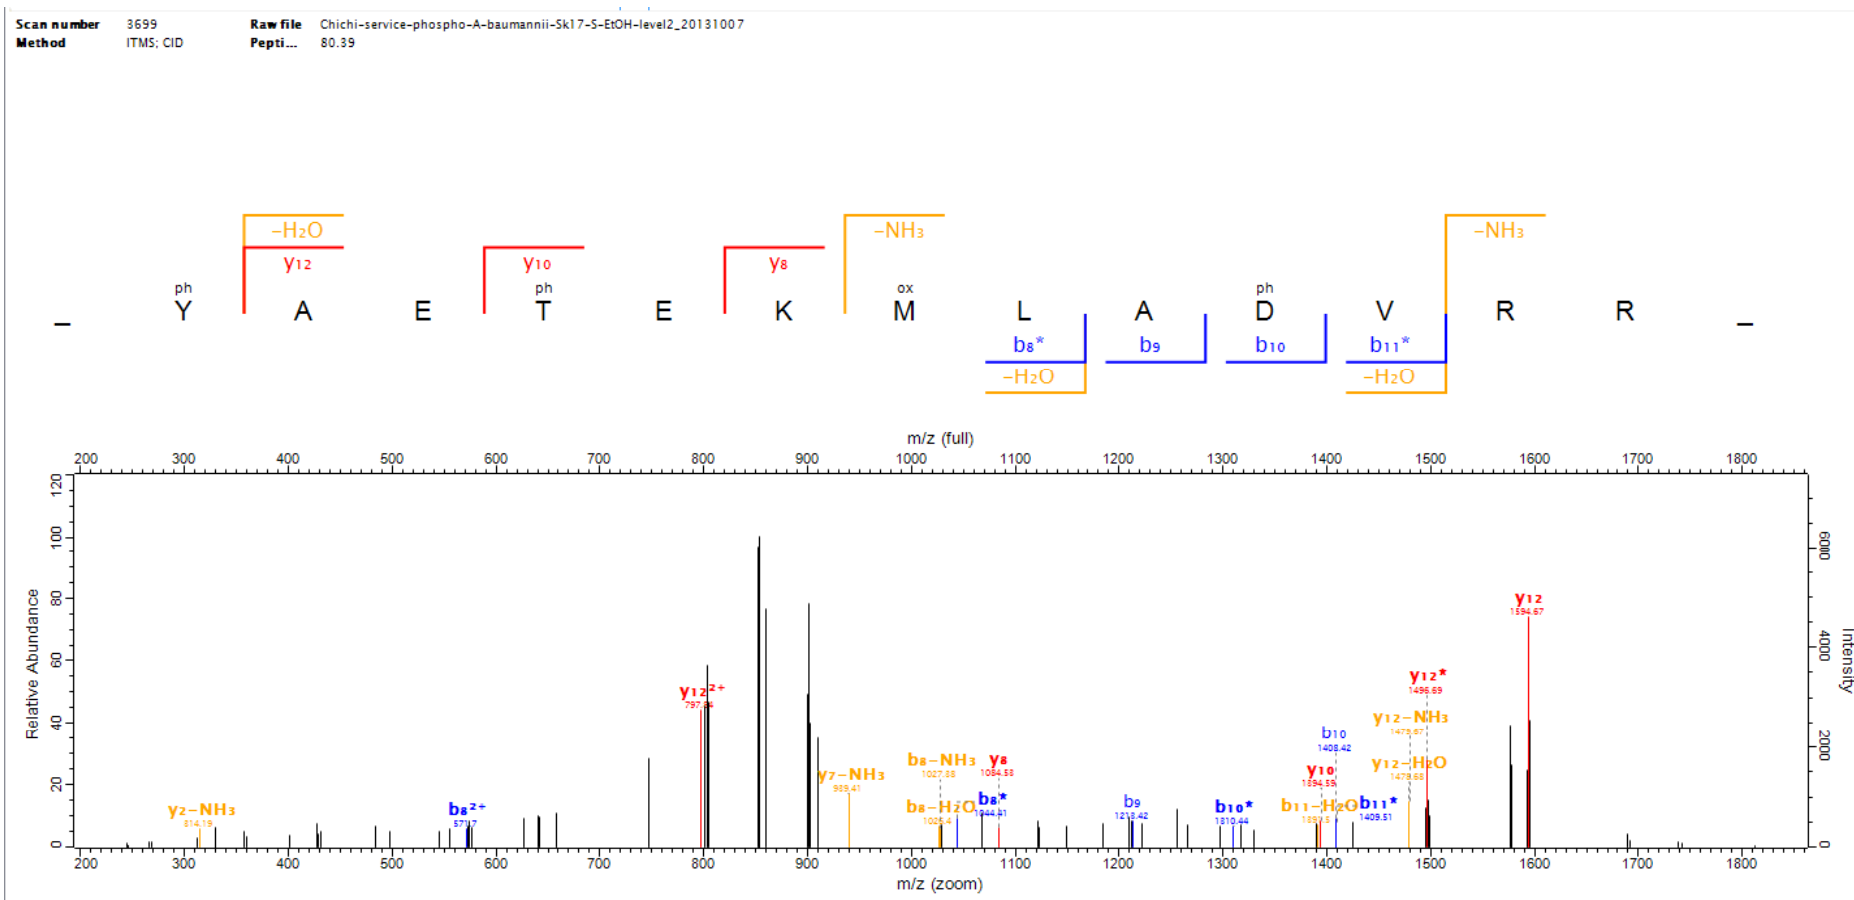

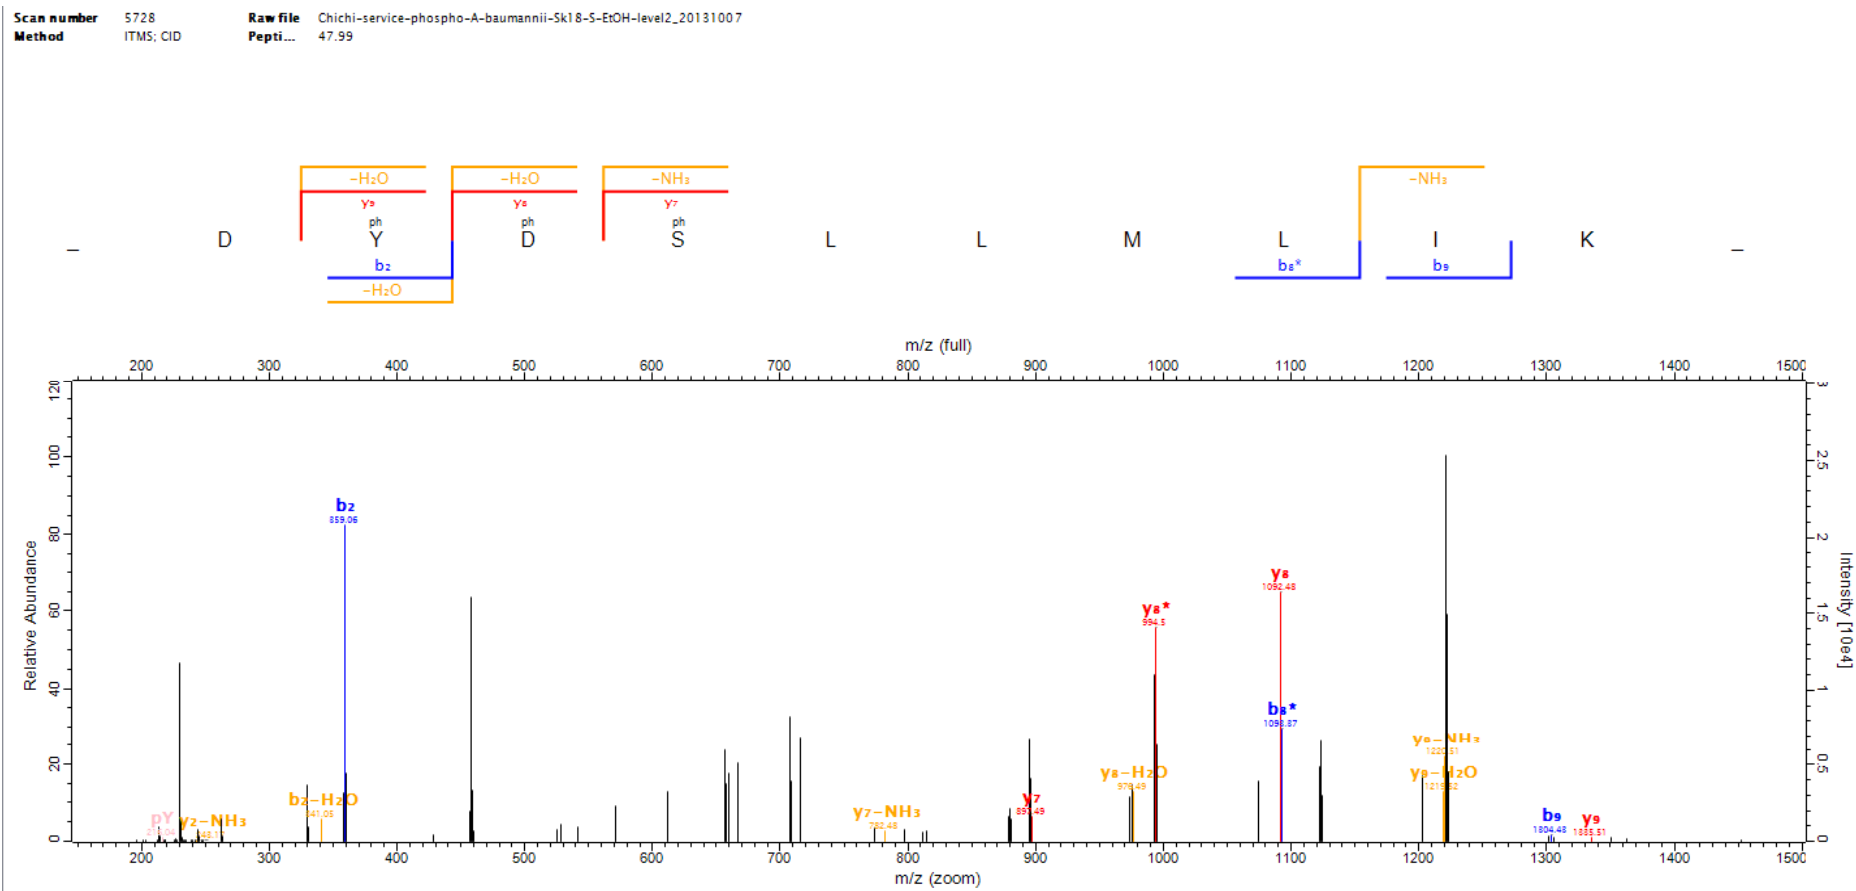

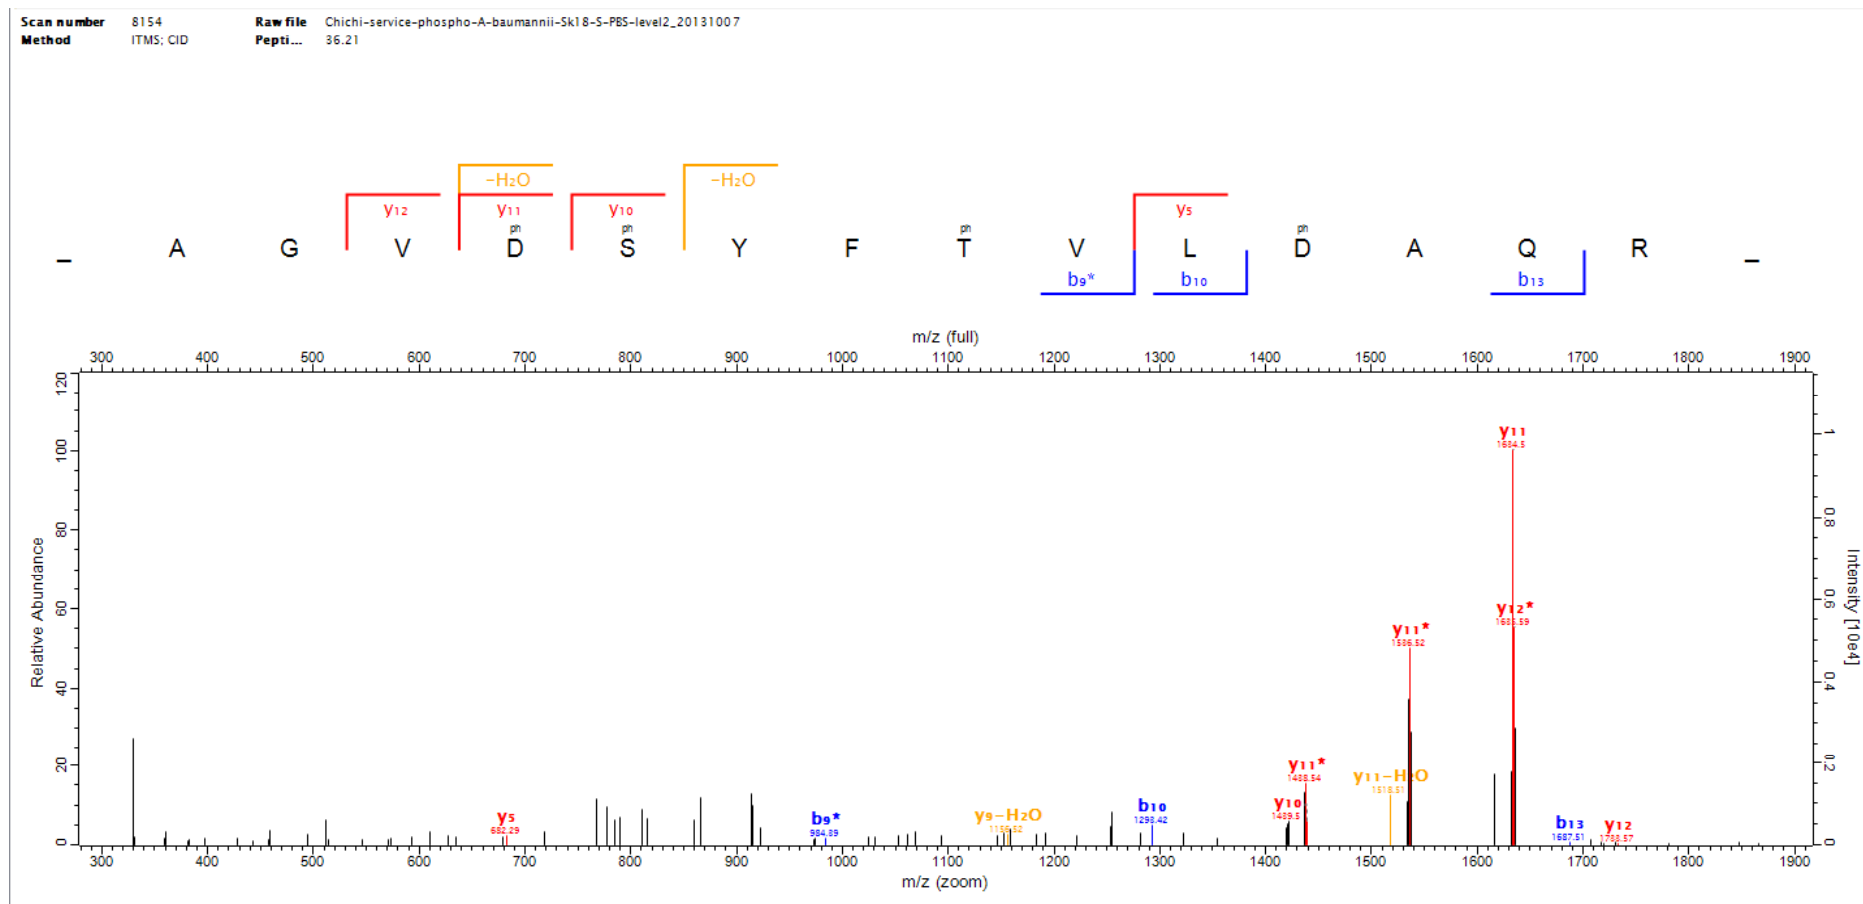

140

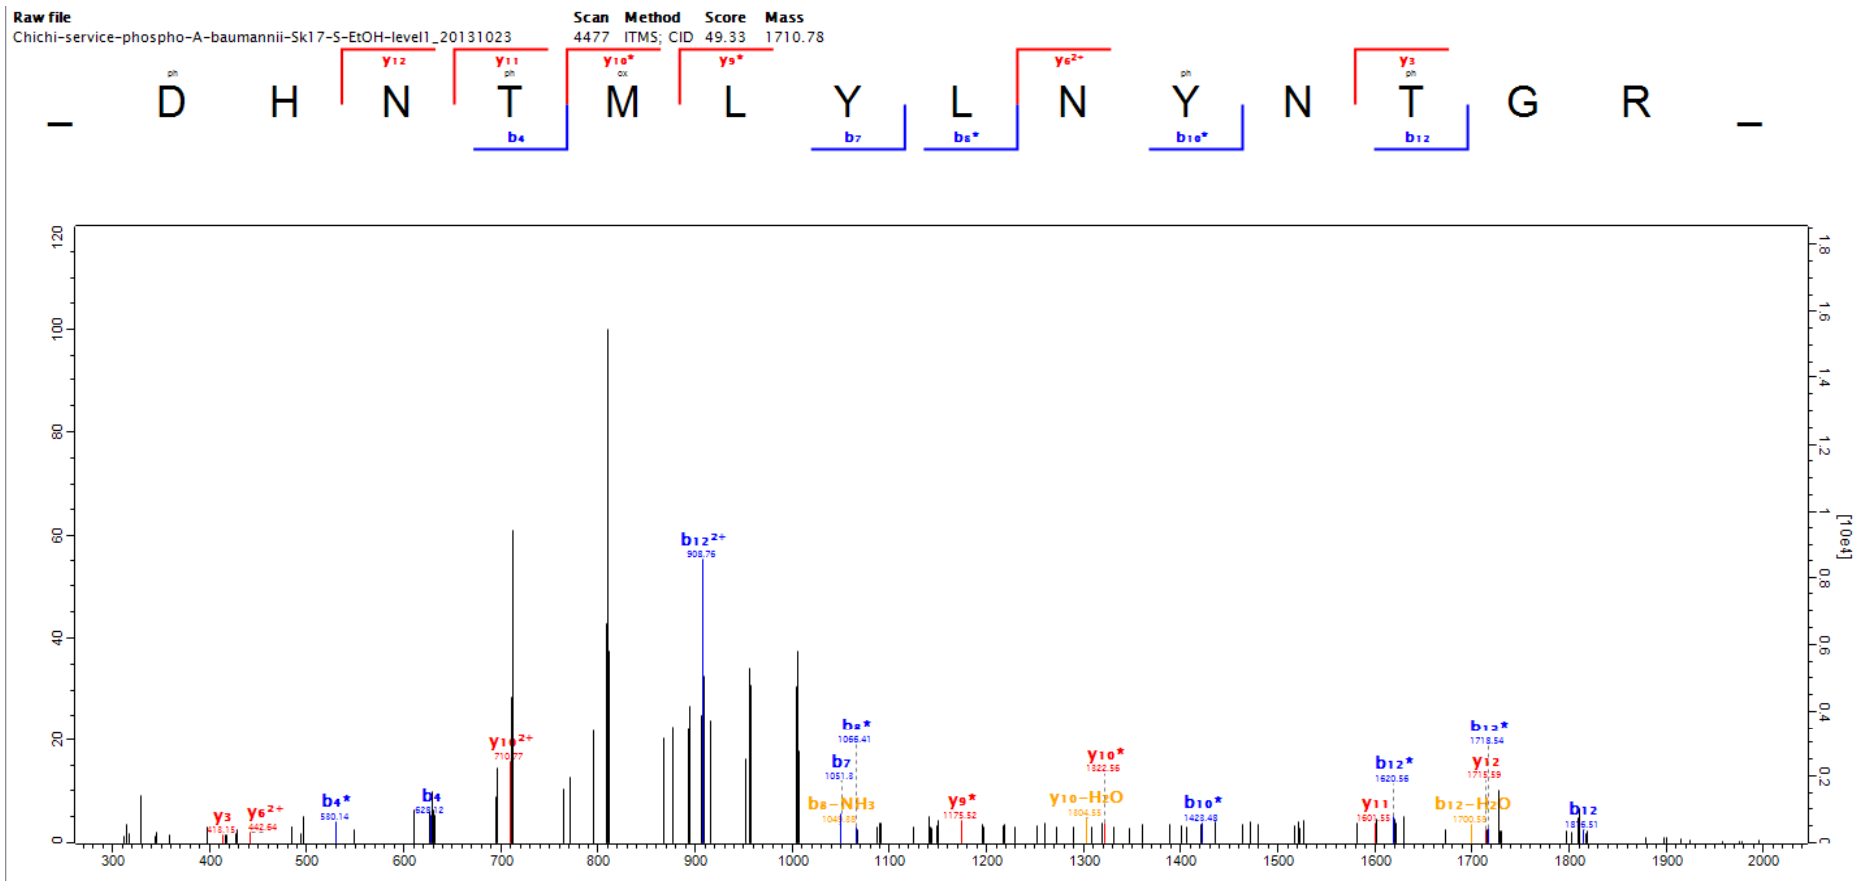

141

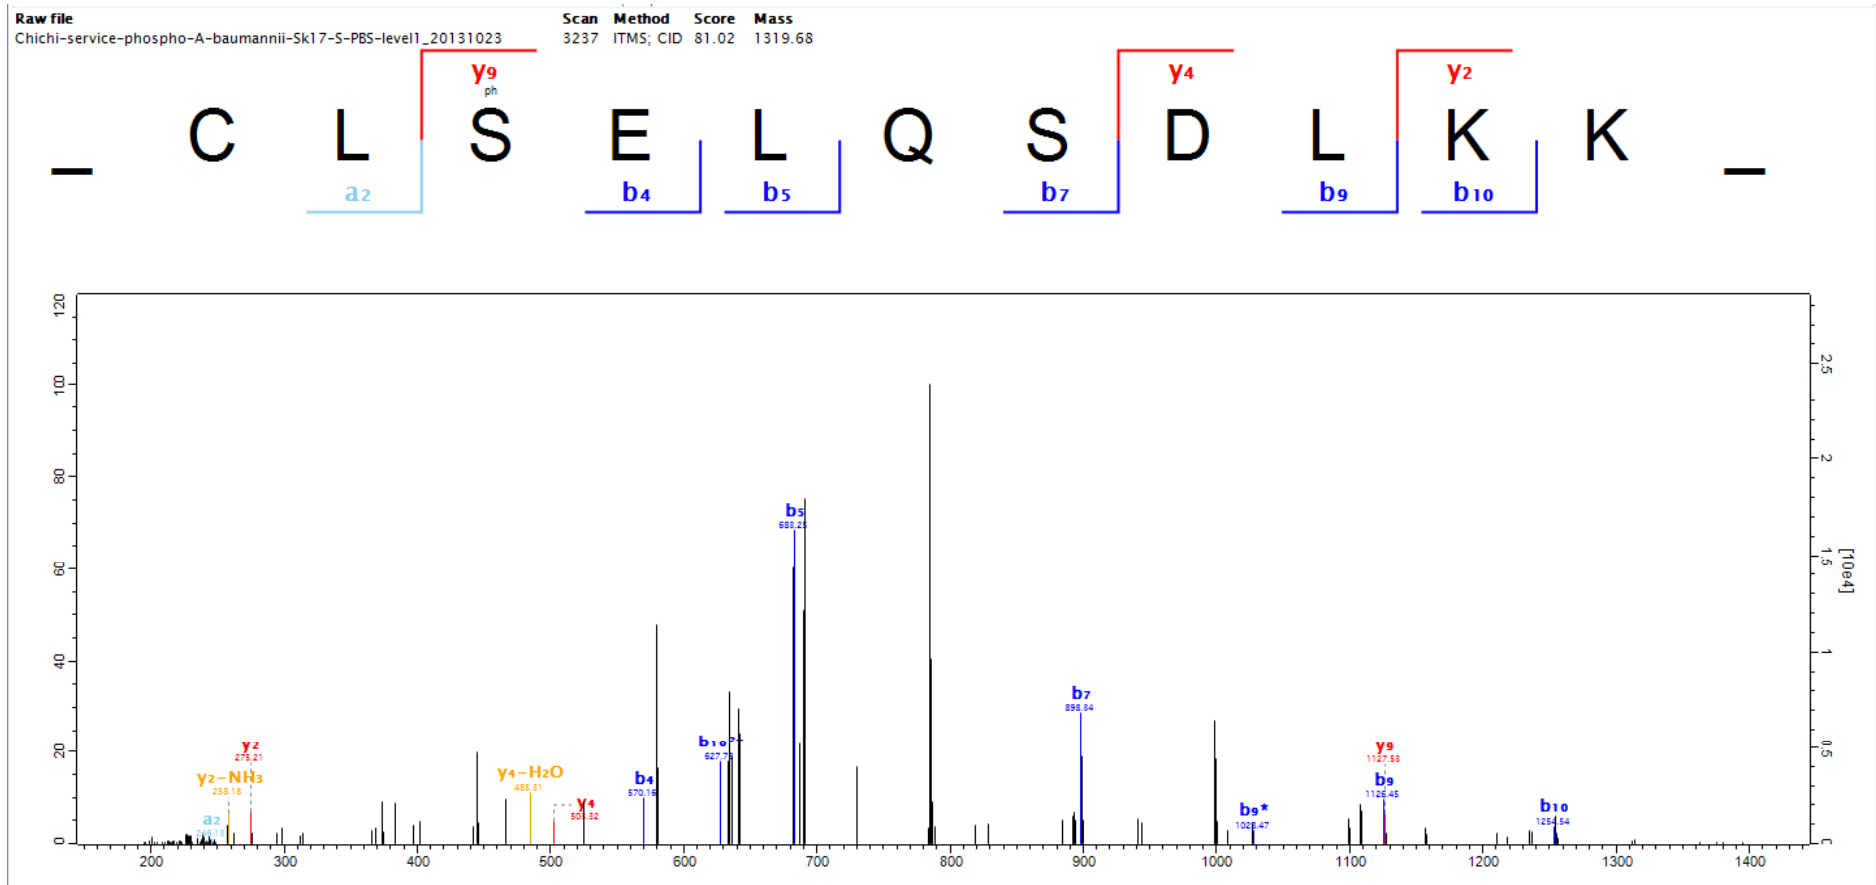

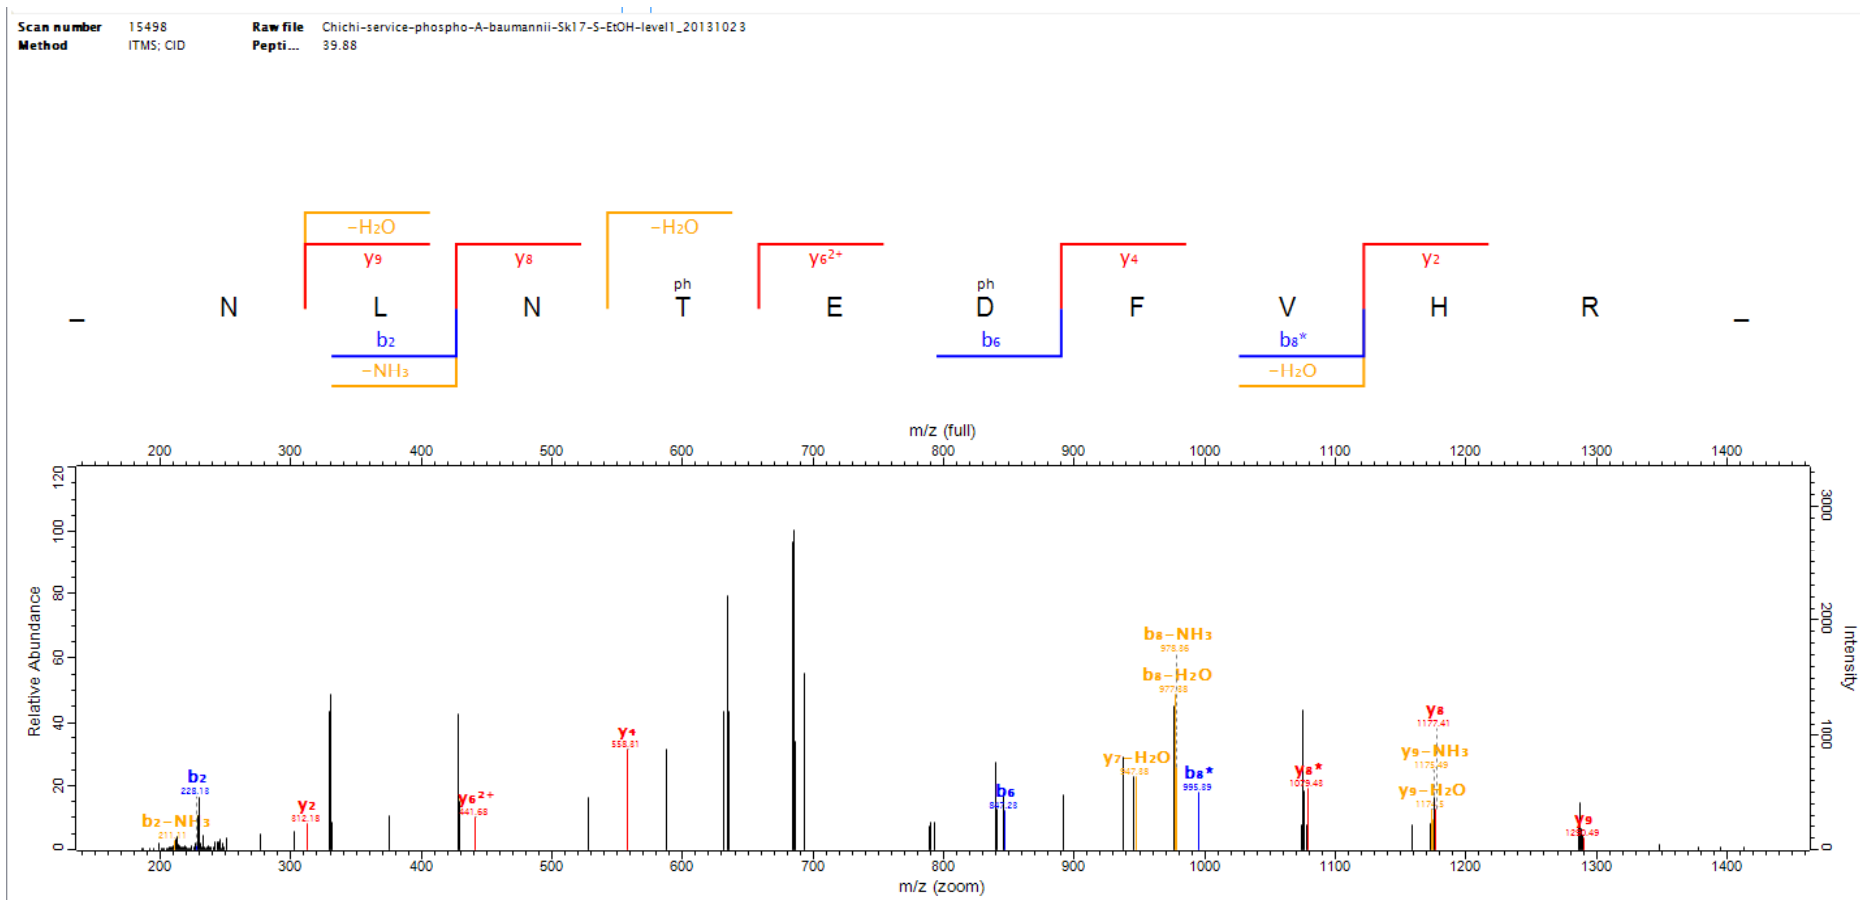



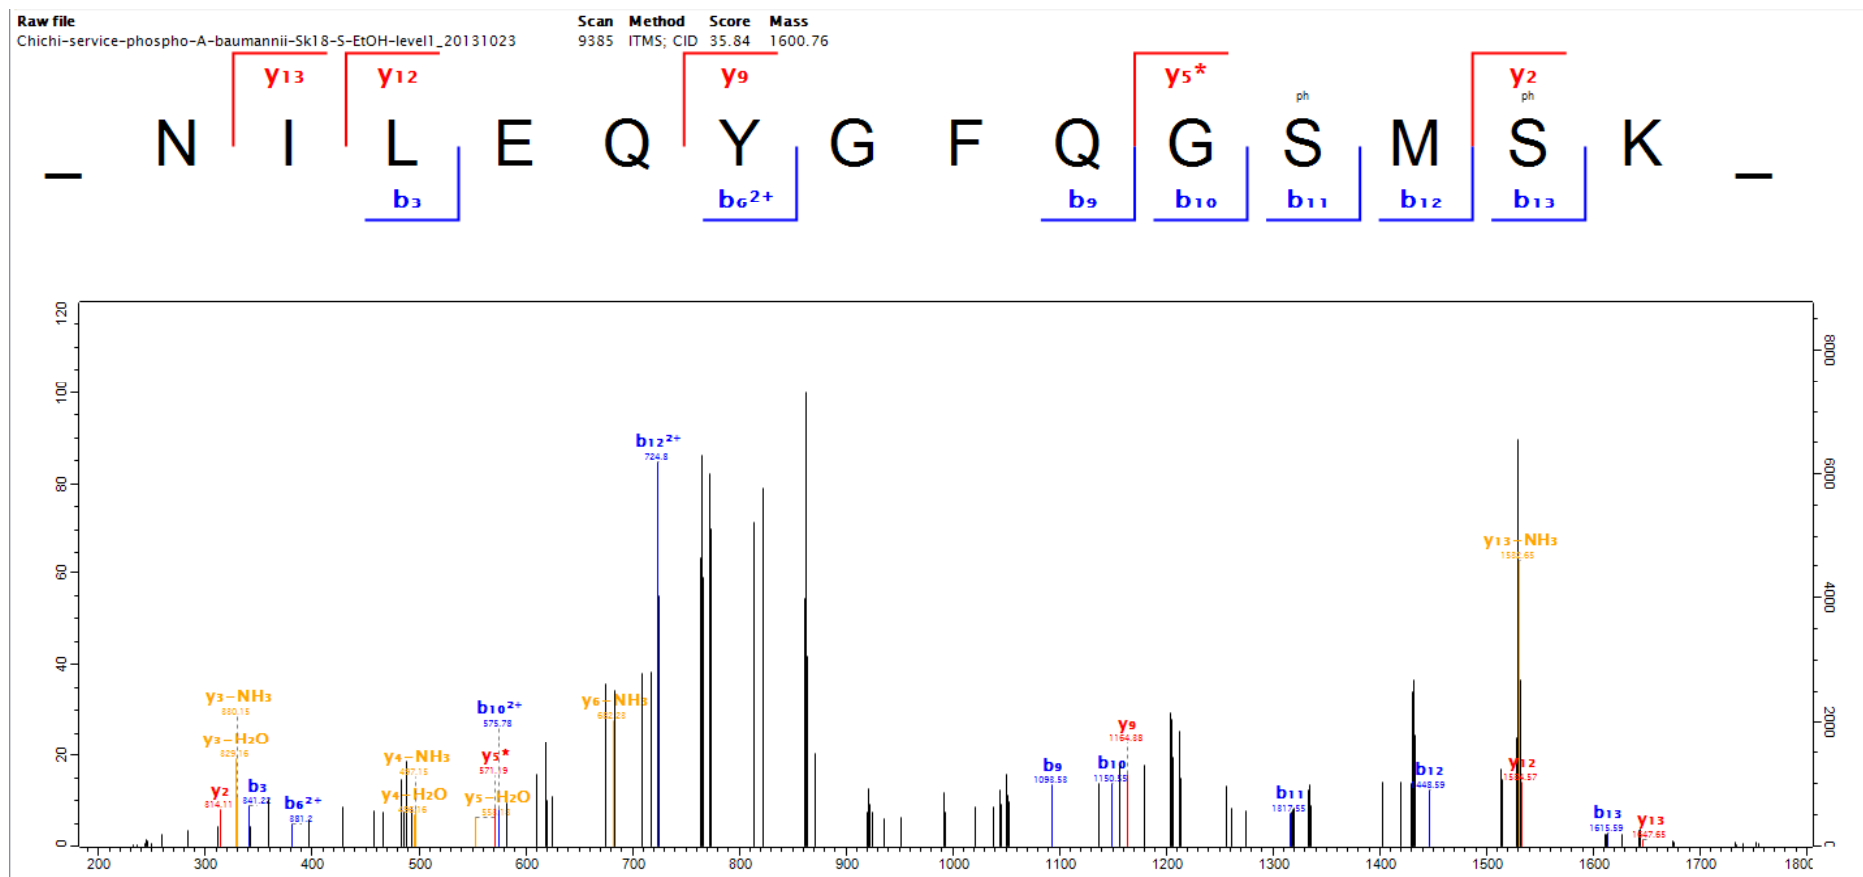

144-1

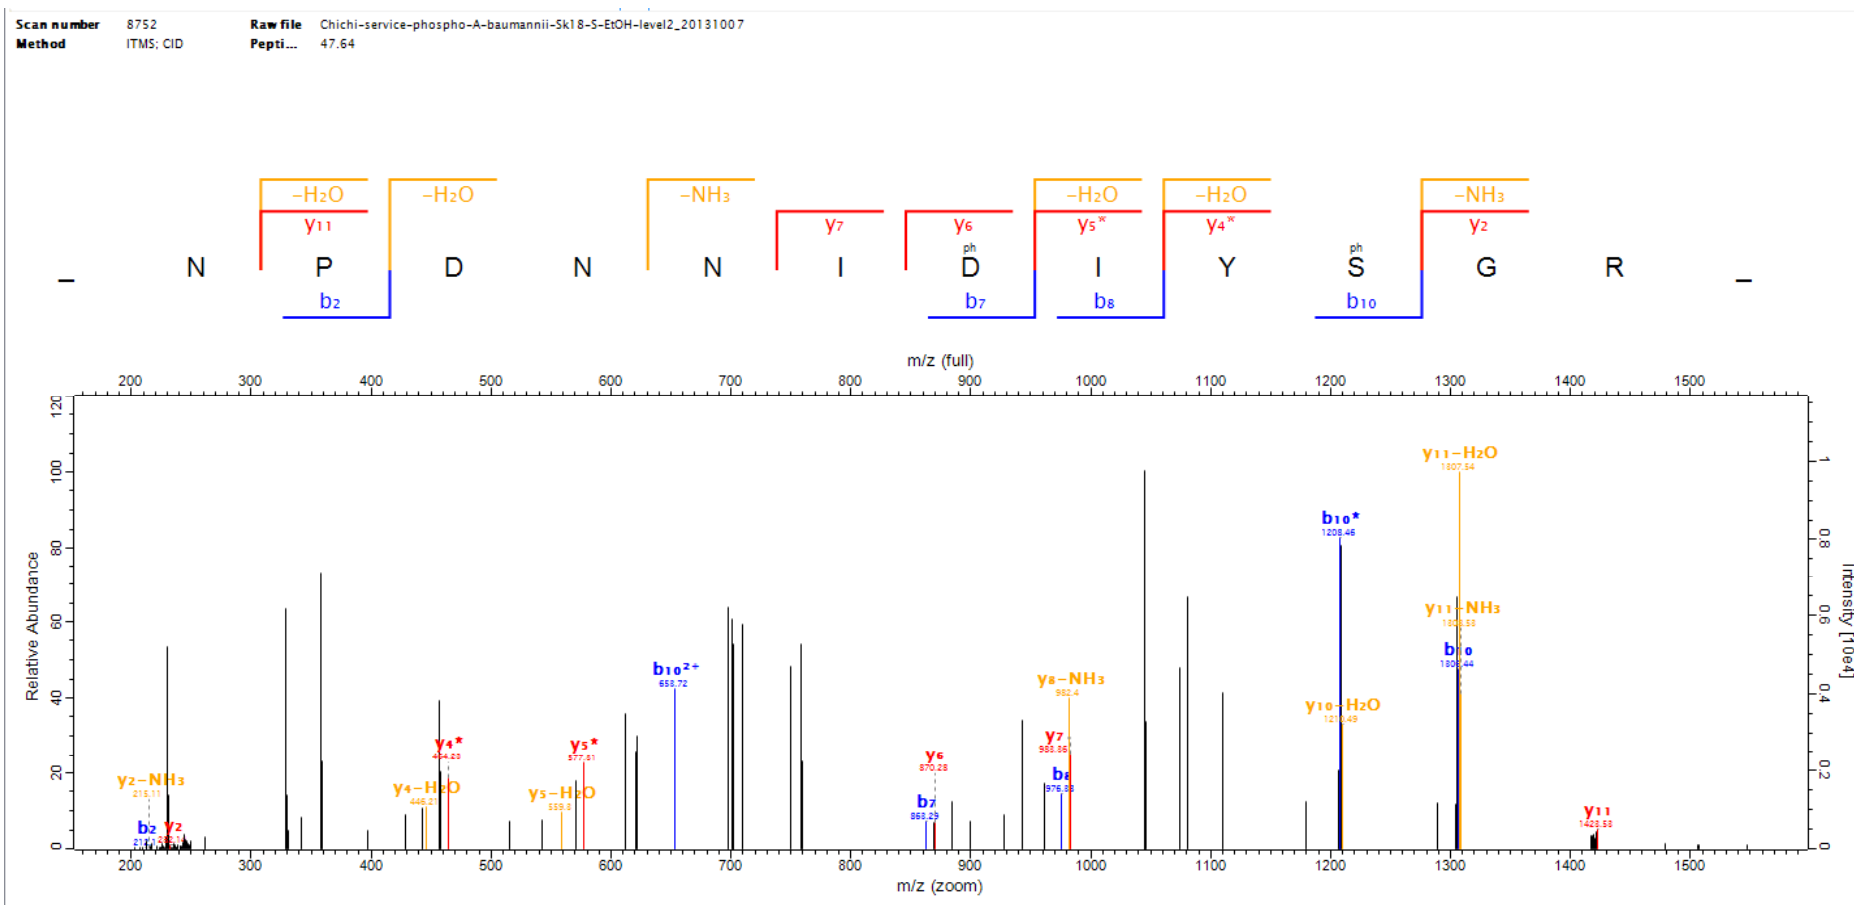

144-2

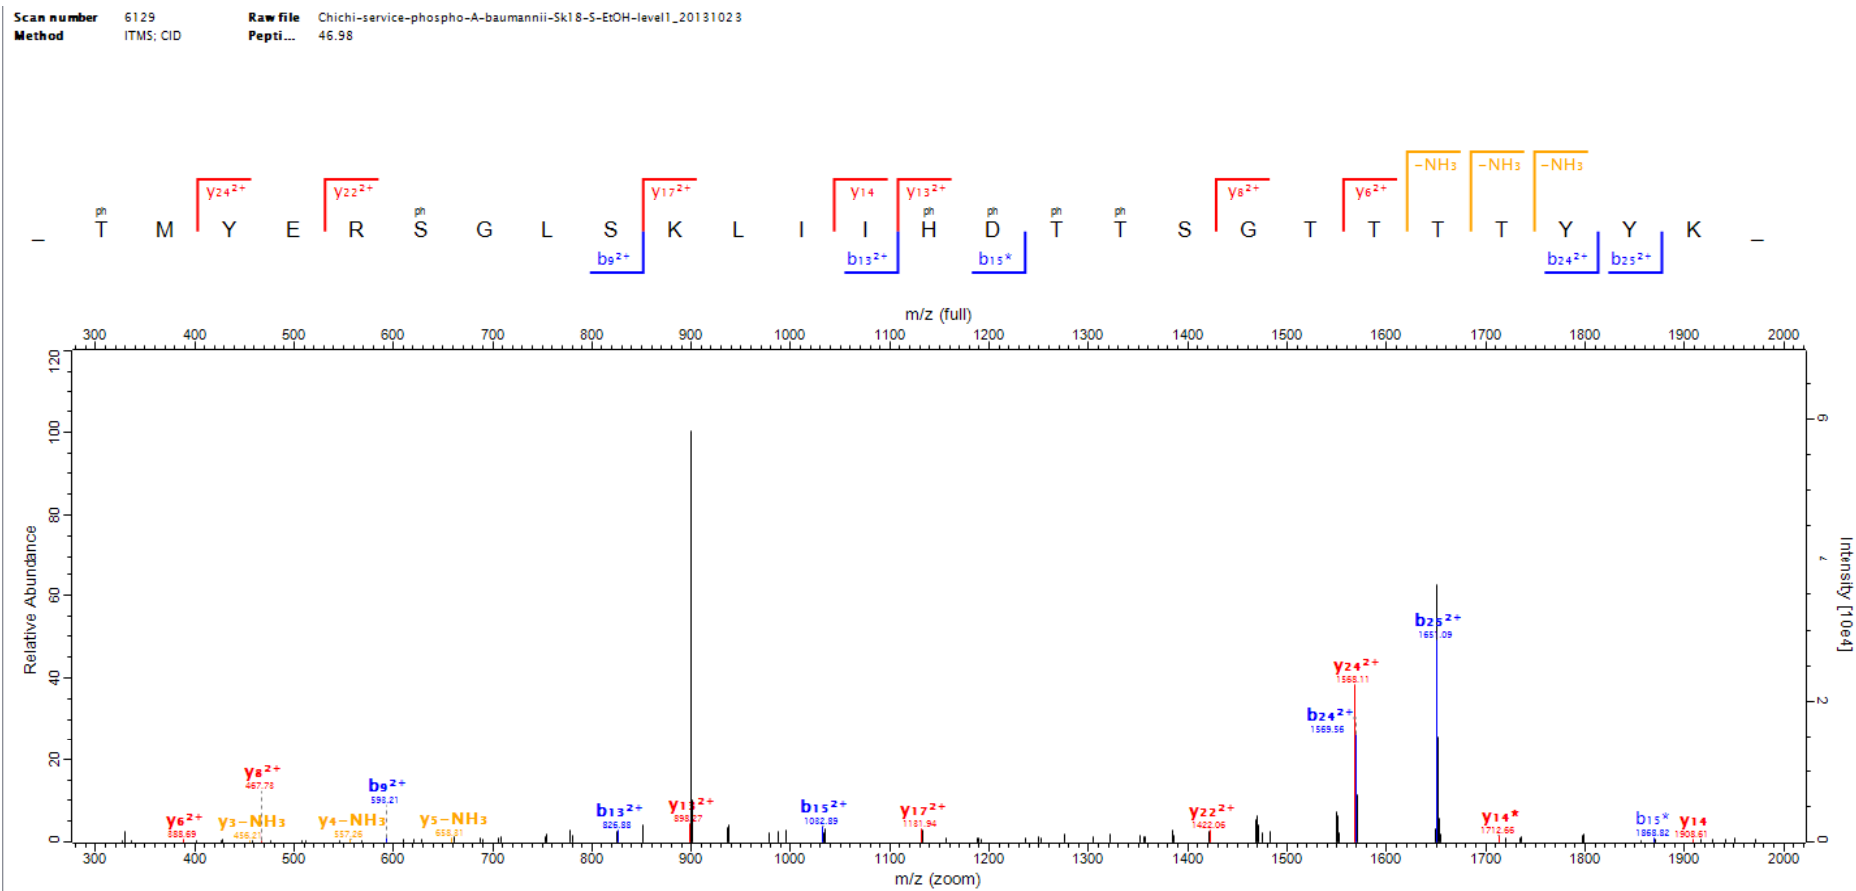

144-3

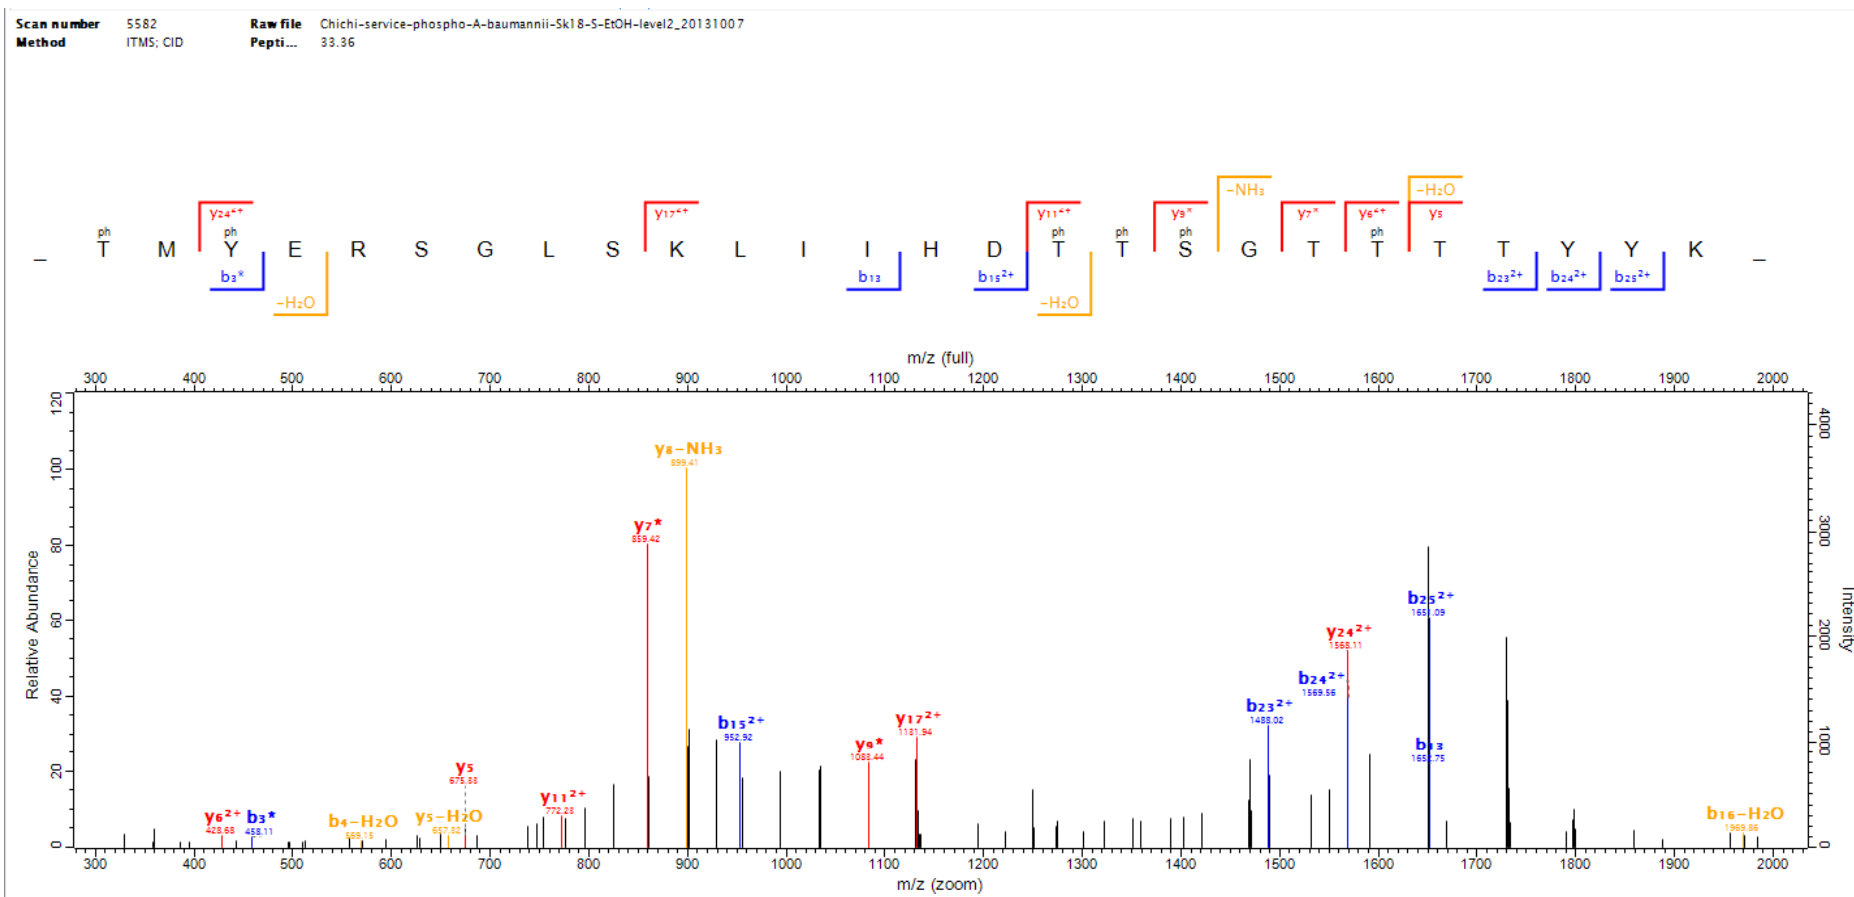

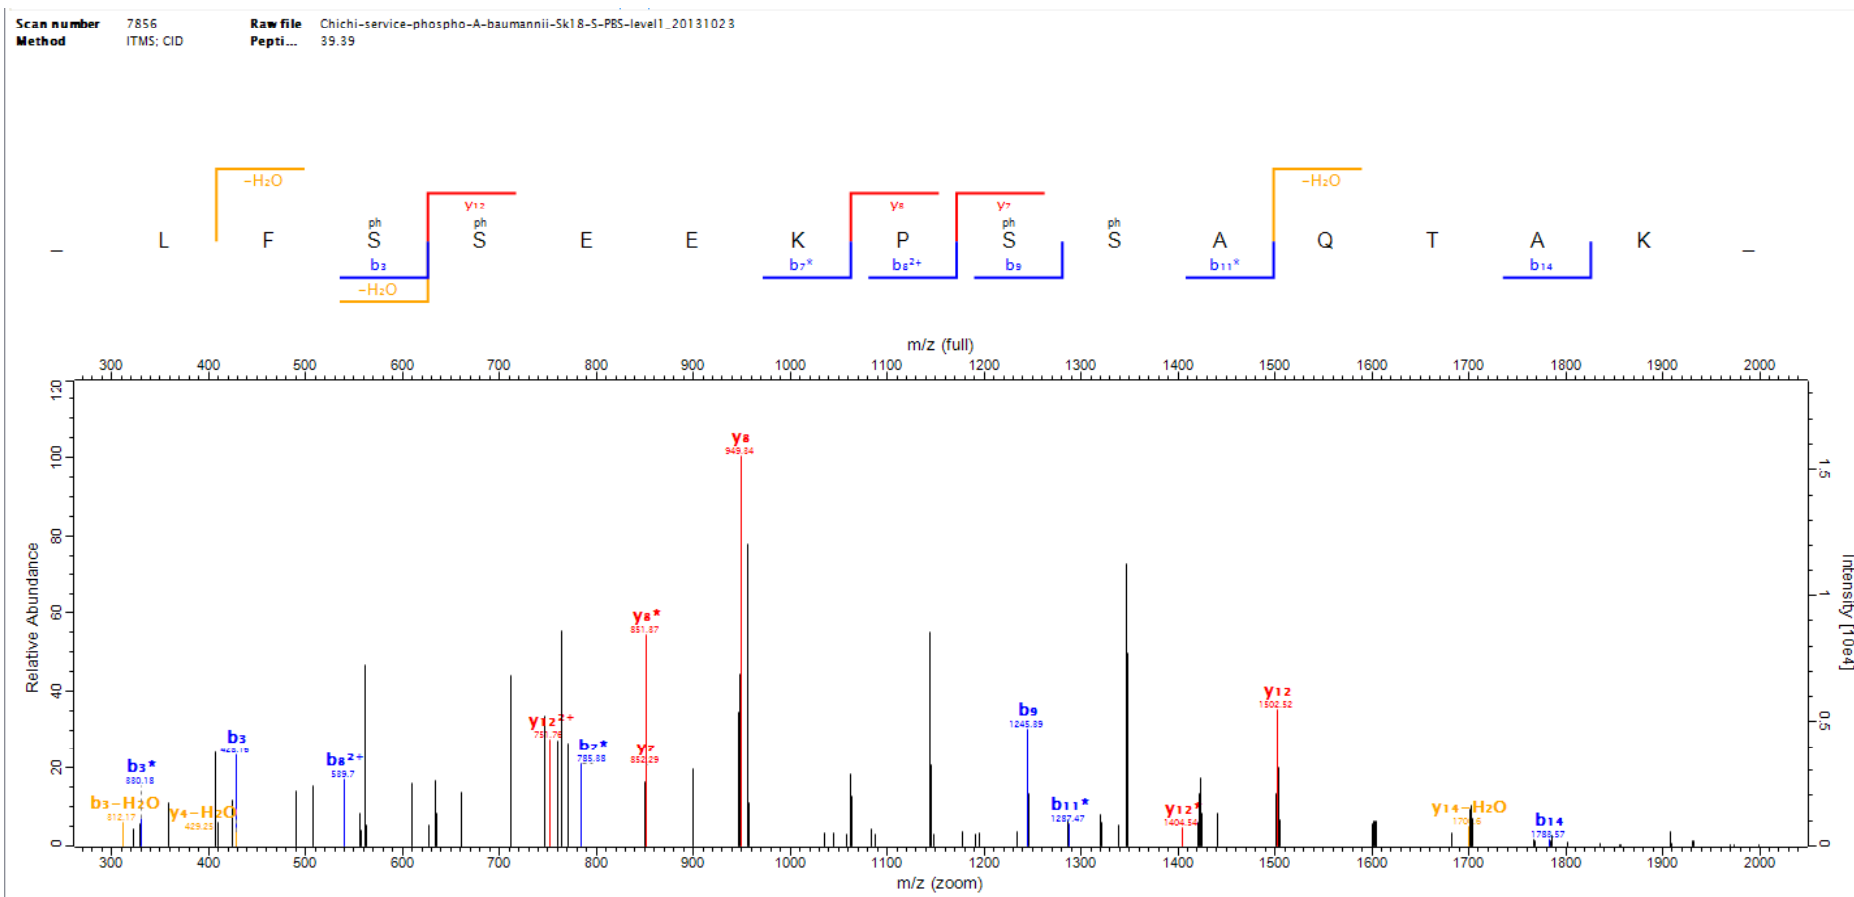

146

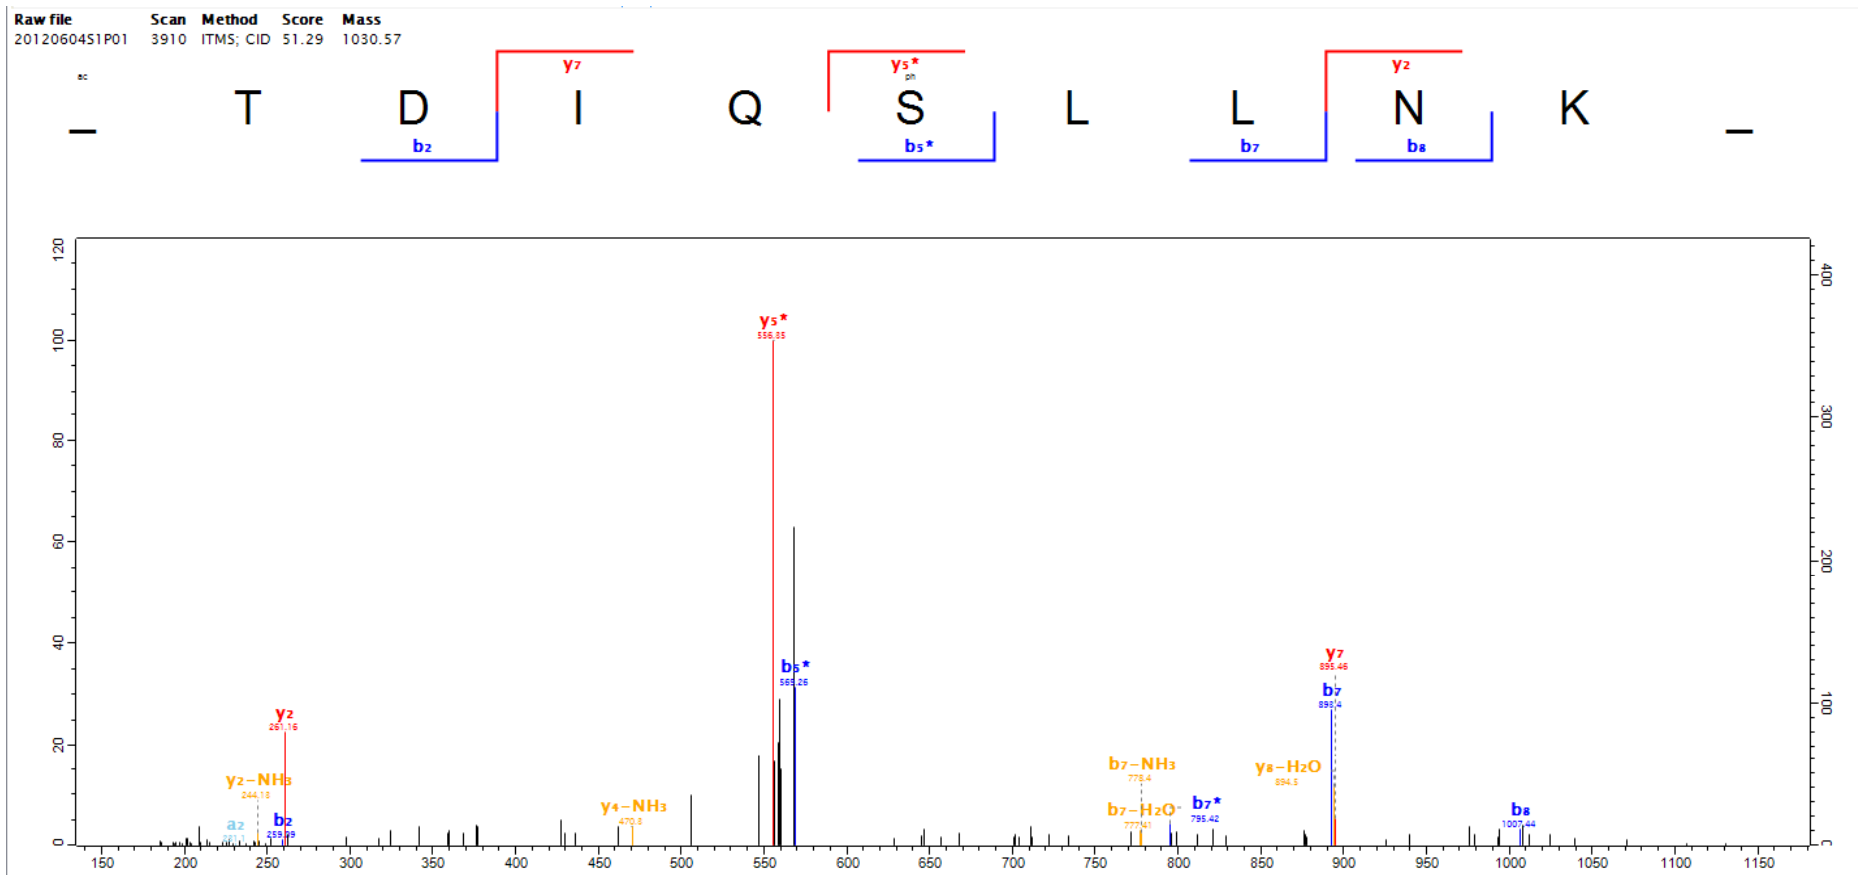

147-1

Raw file  
Chichi-service-phospho-A-baumannii-Sk17-S-PBS-level1\_20131023

| Scan | Method    | Score | Mass    |
|------|-----------|-------|---------|
| 6196 | ITMS; CID | 39.75 | 1463.72 |

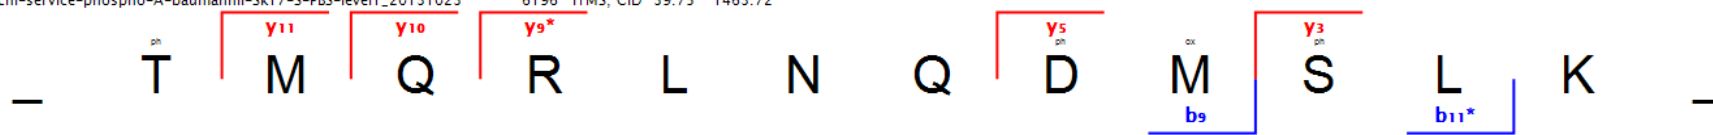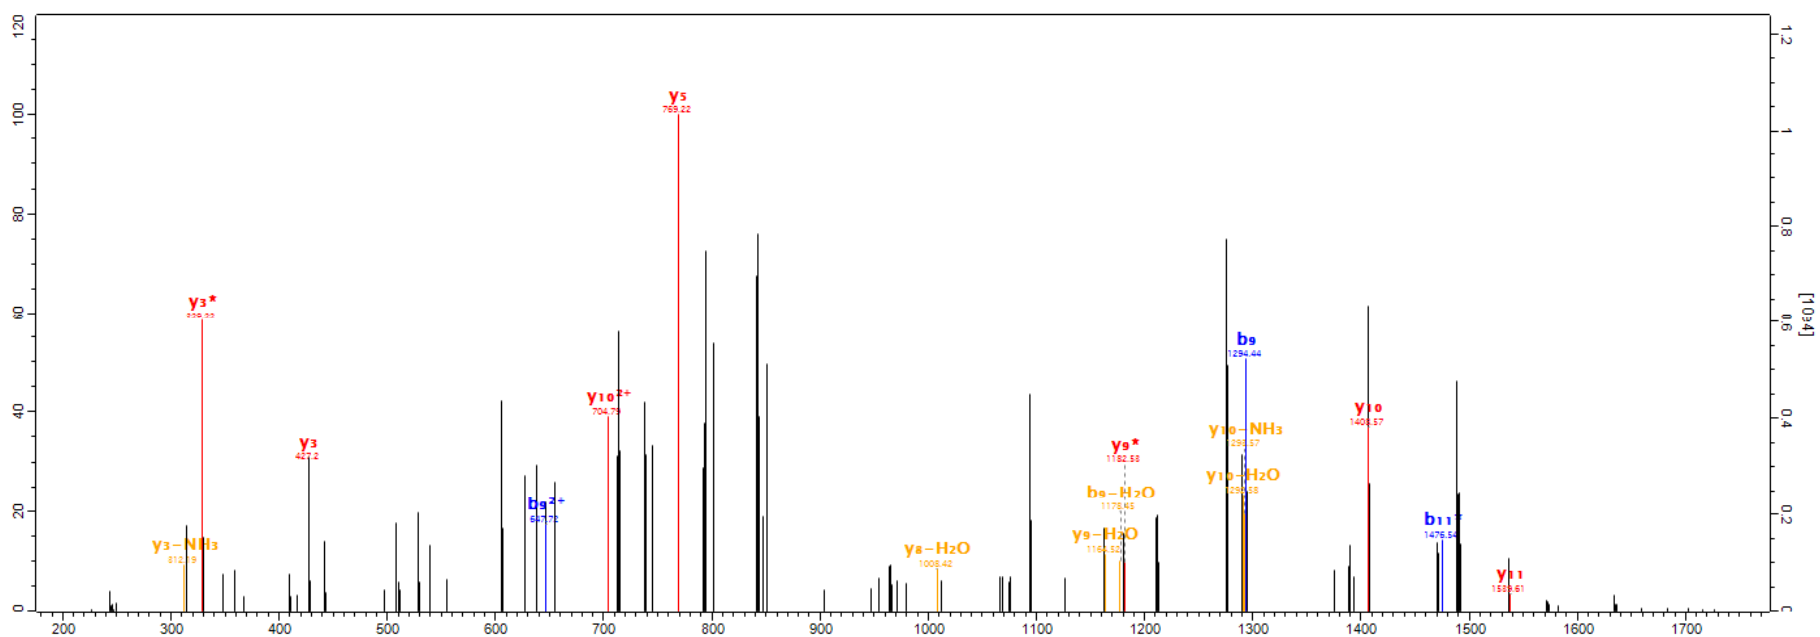

147-2

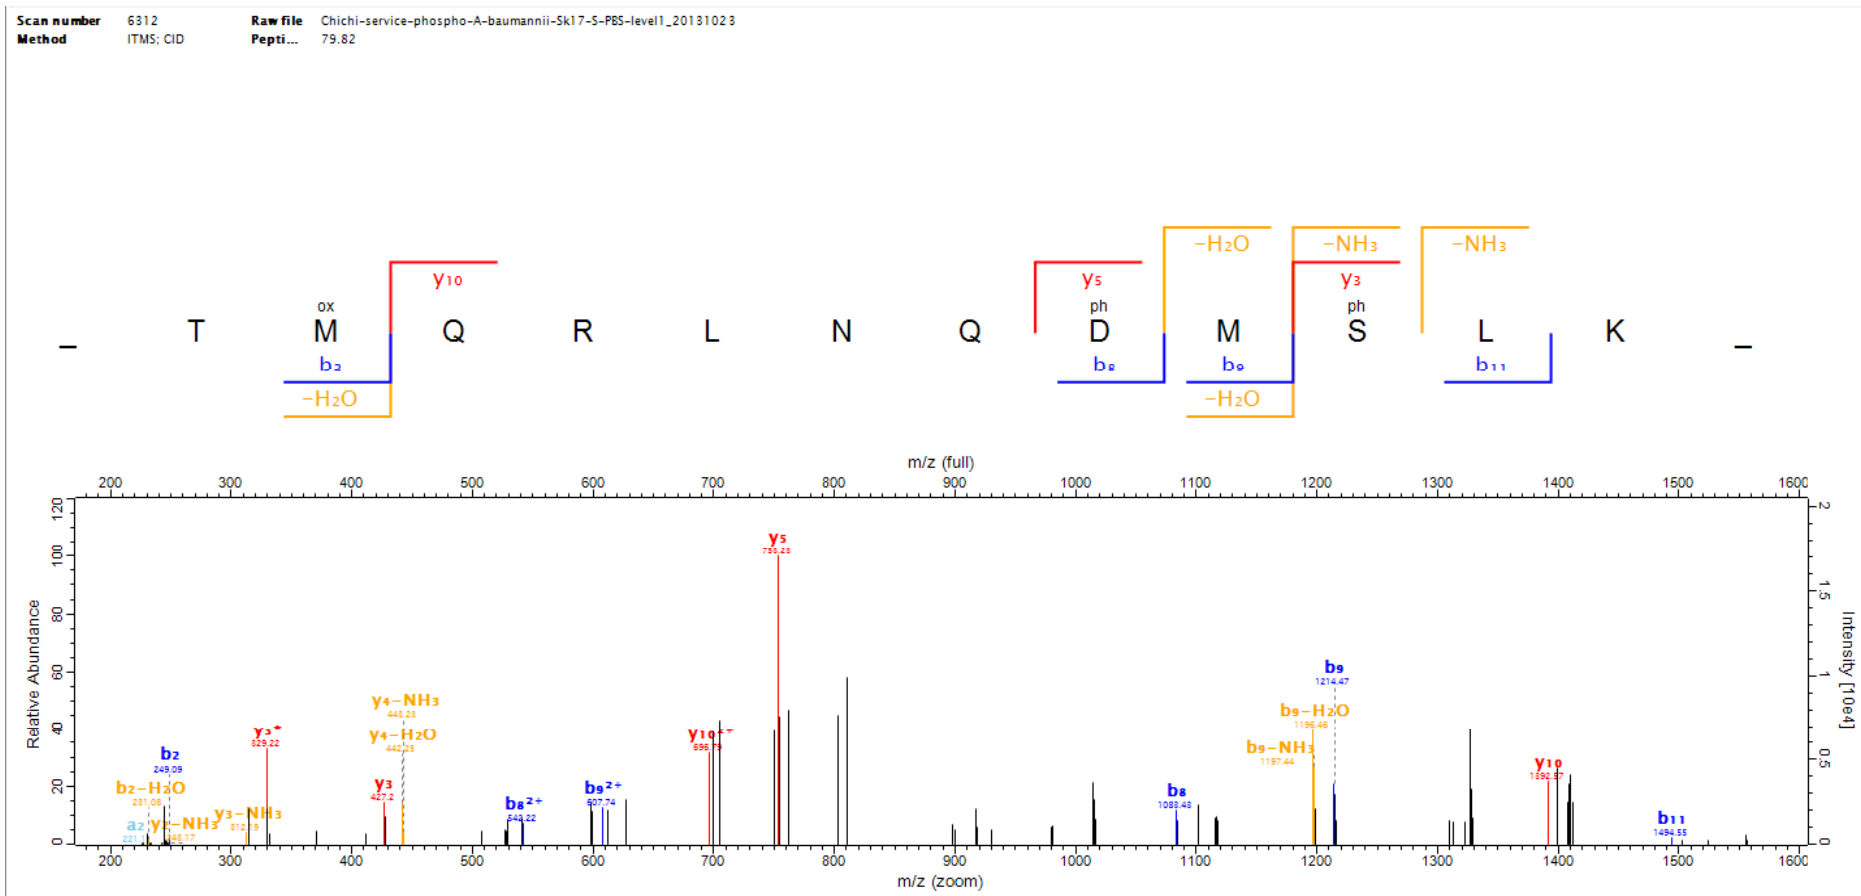



148

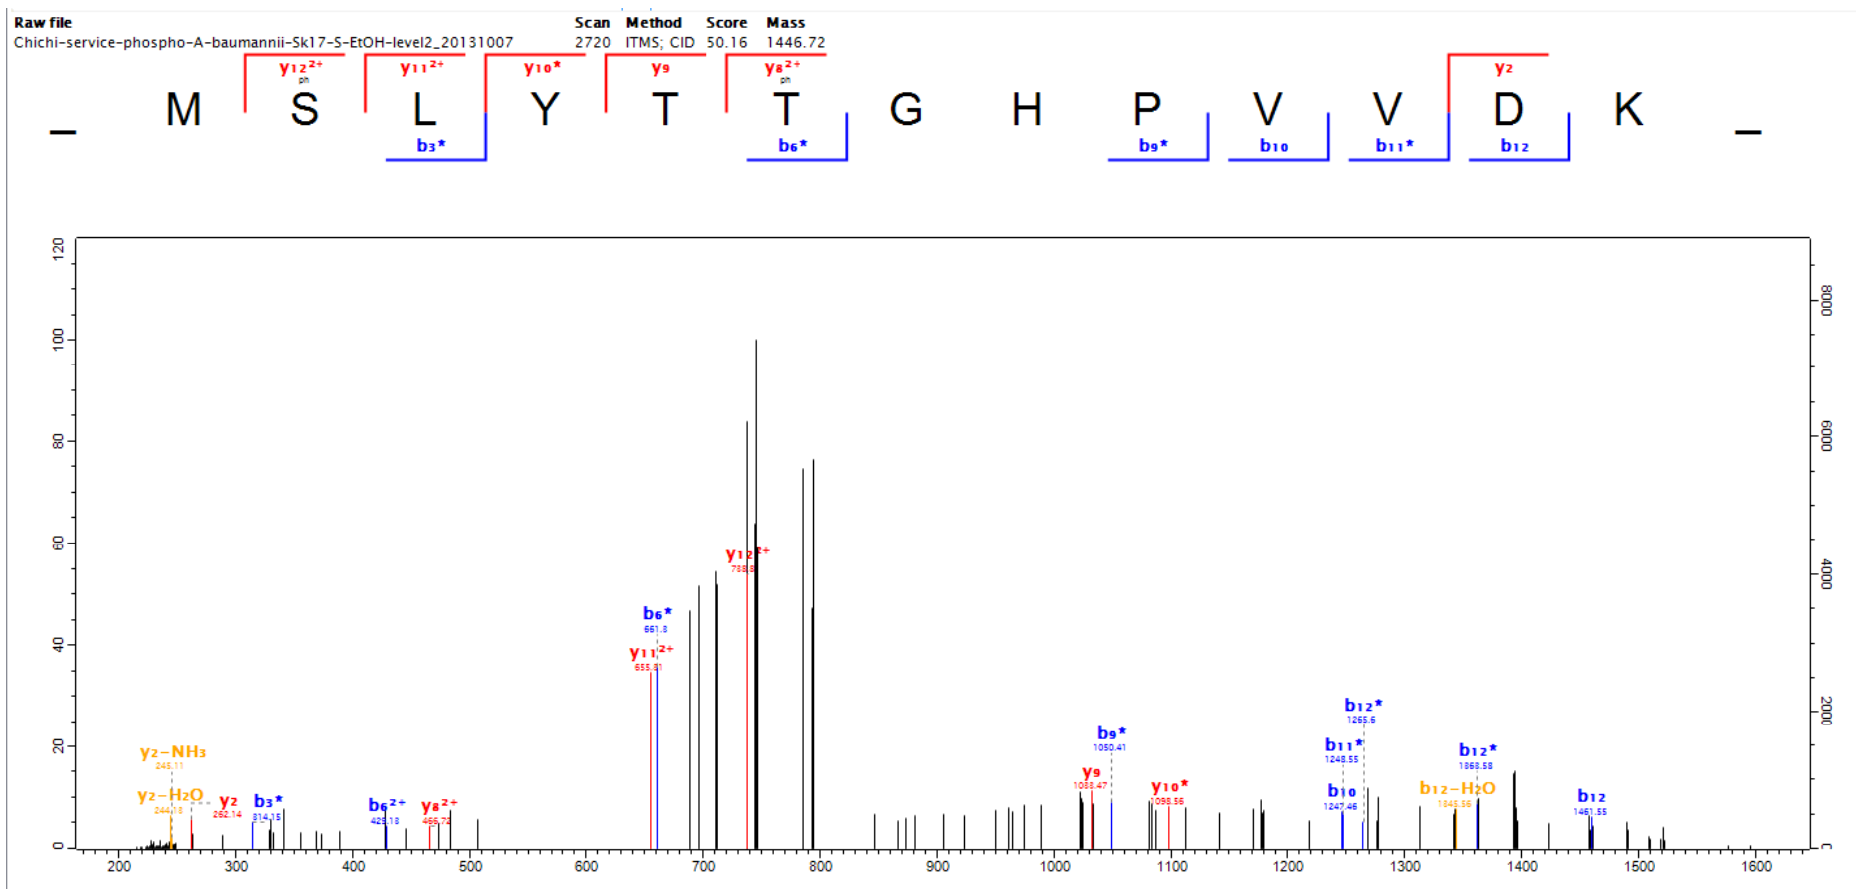

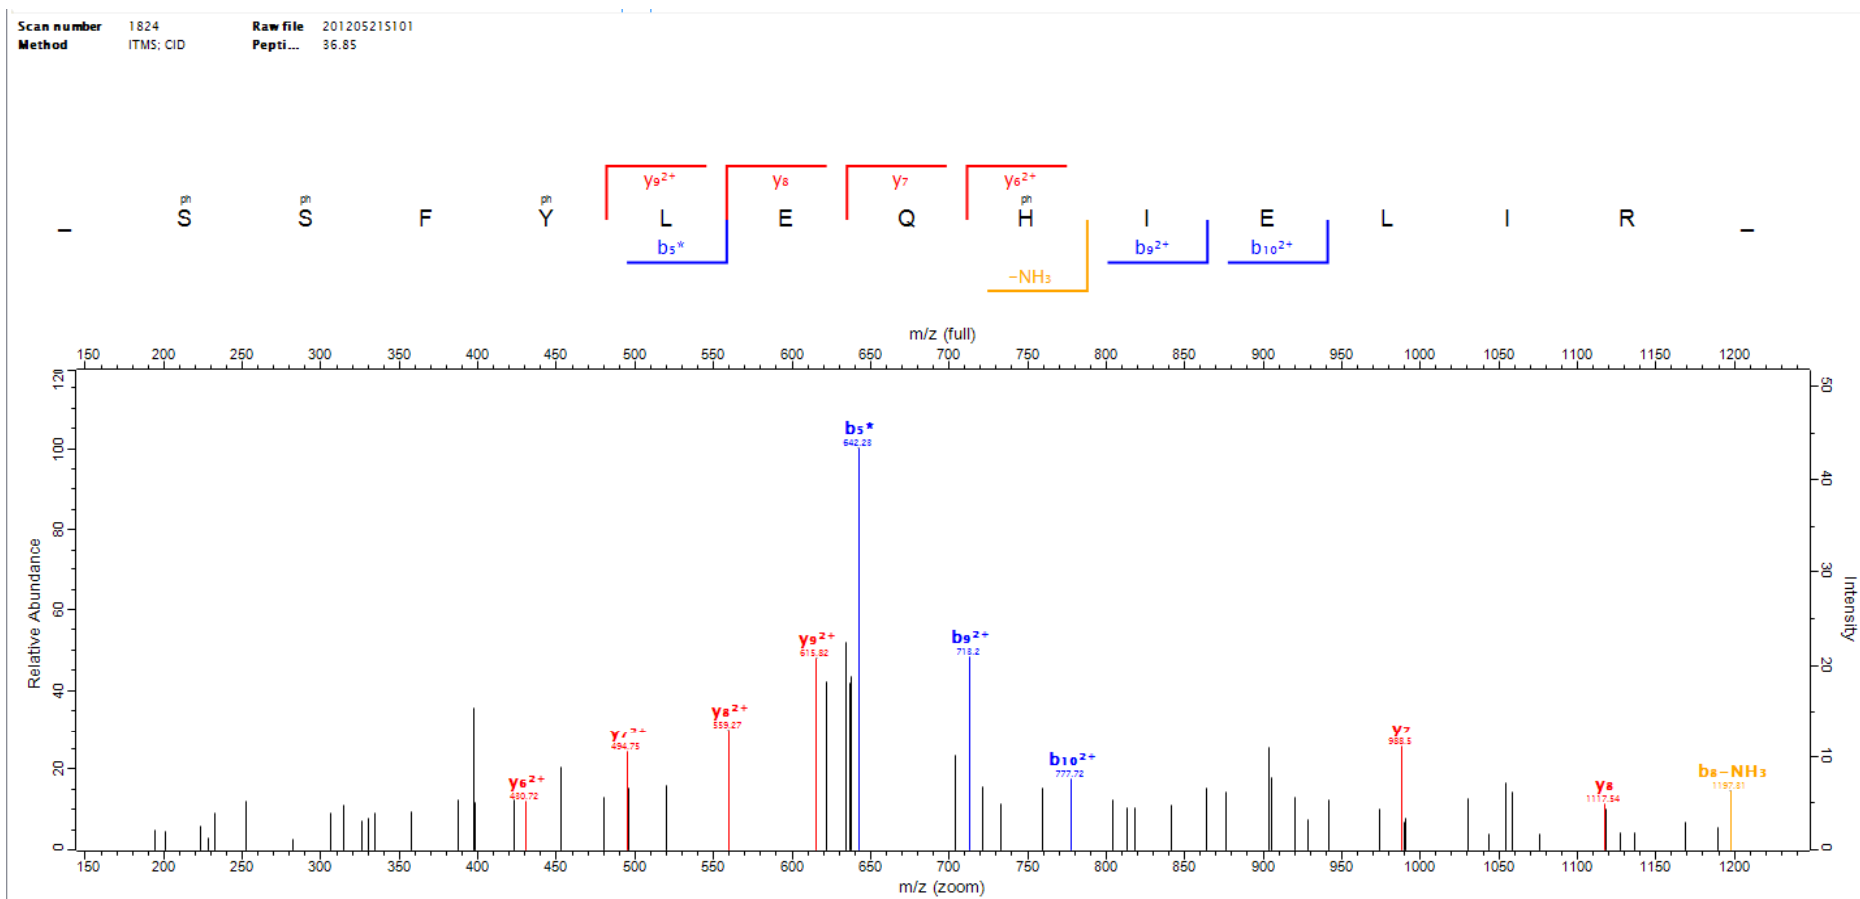

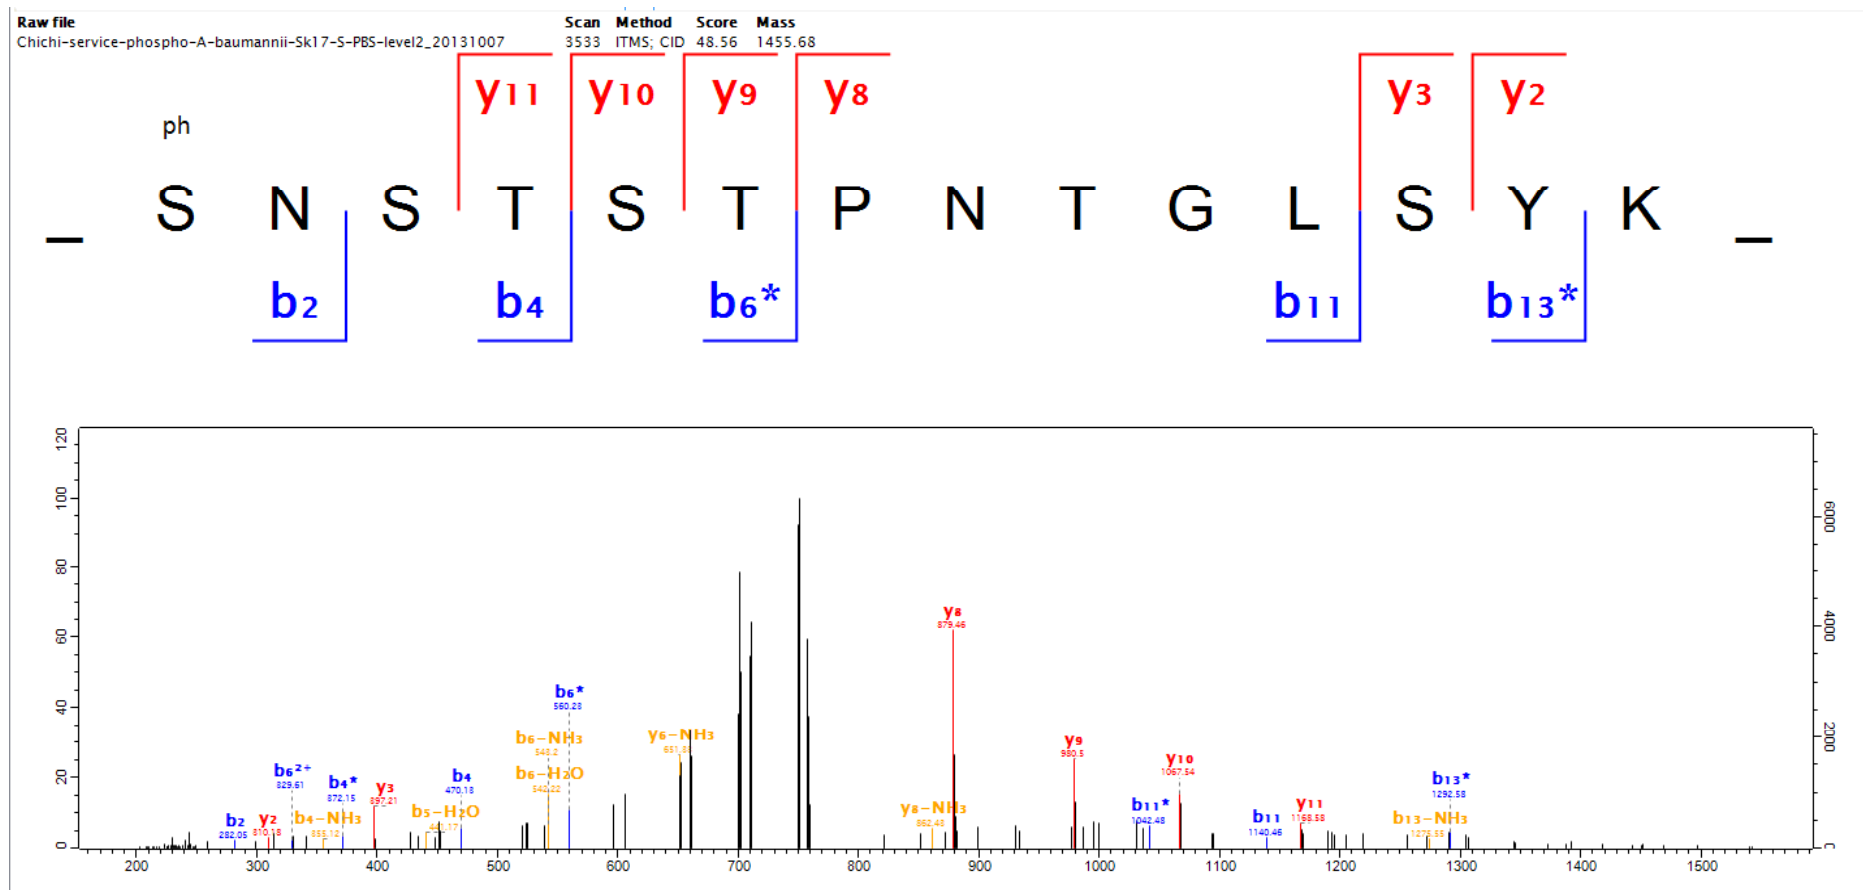

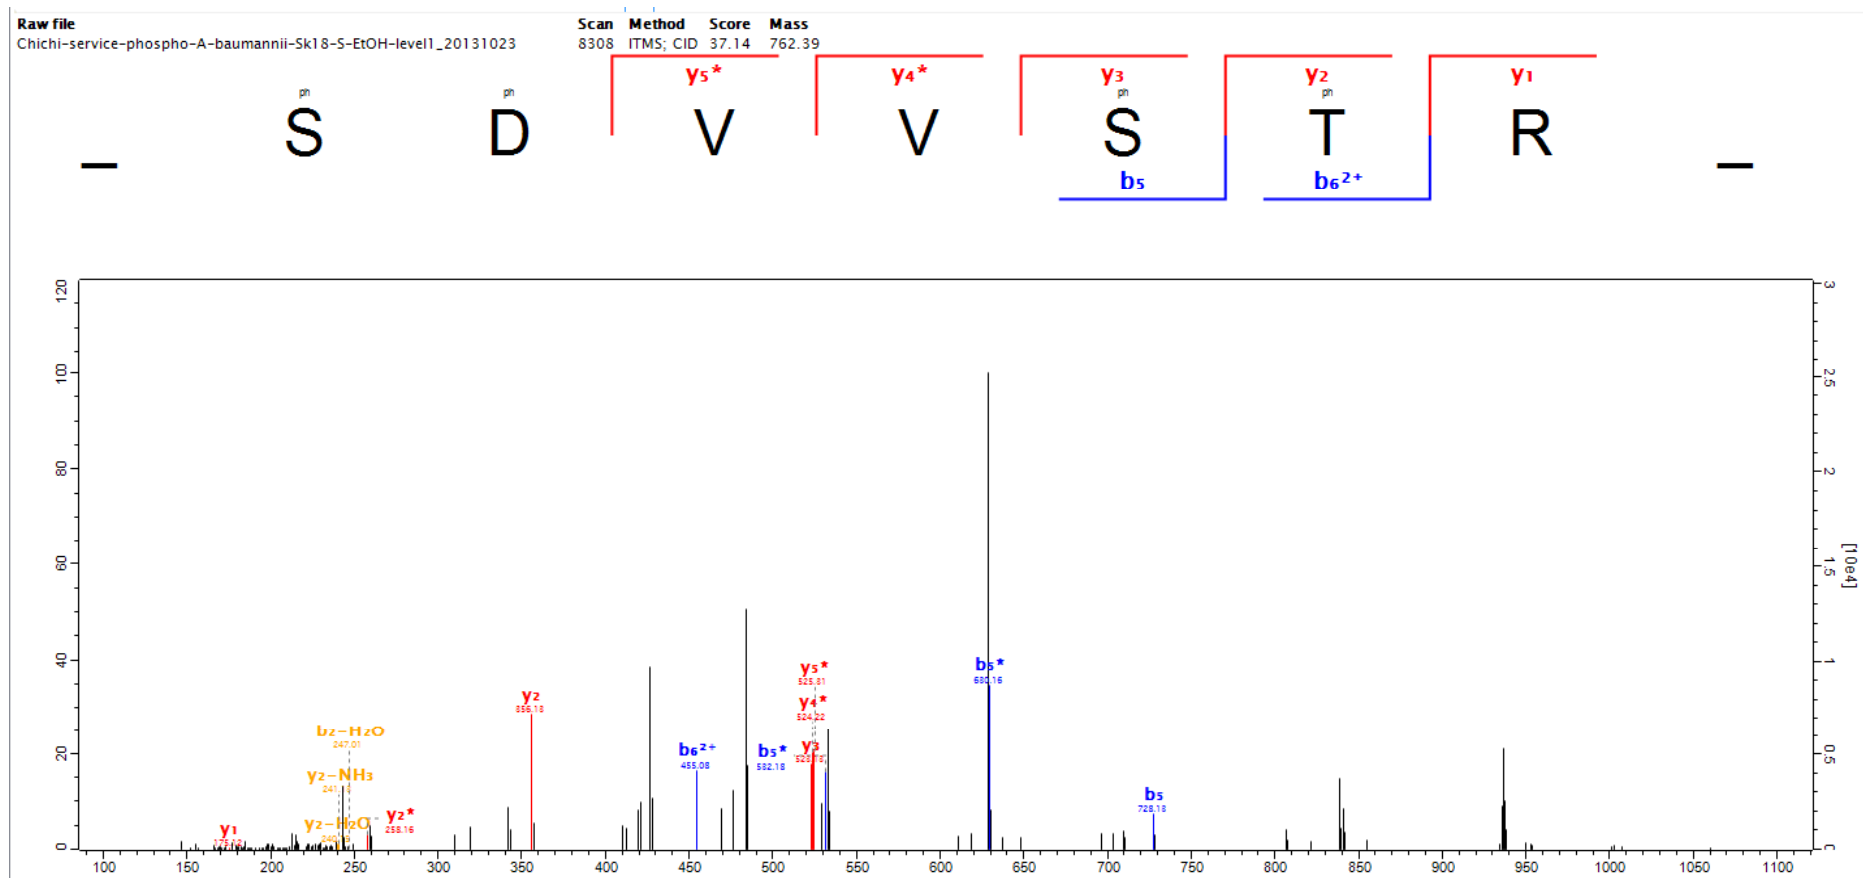

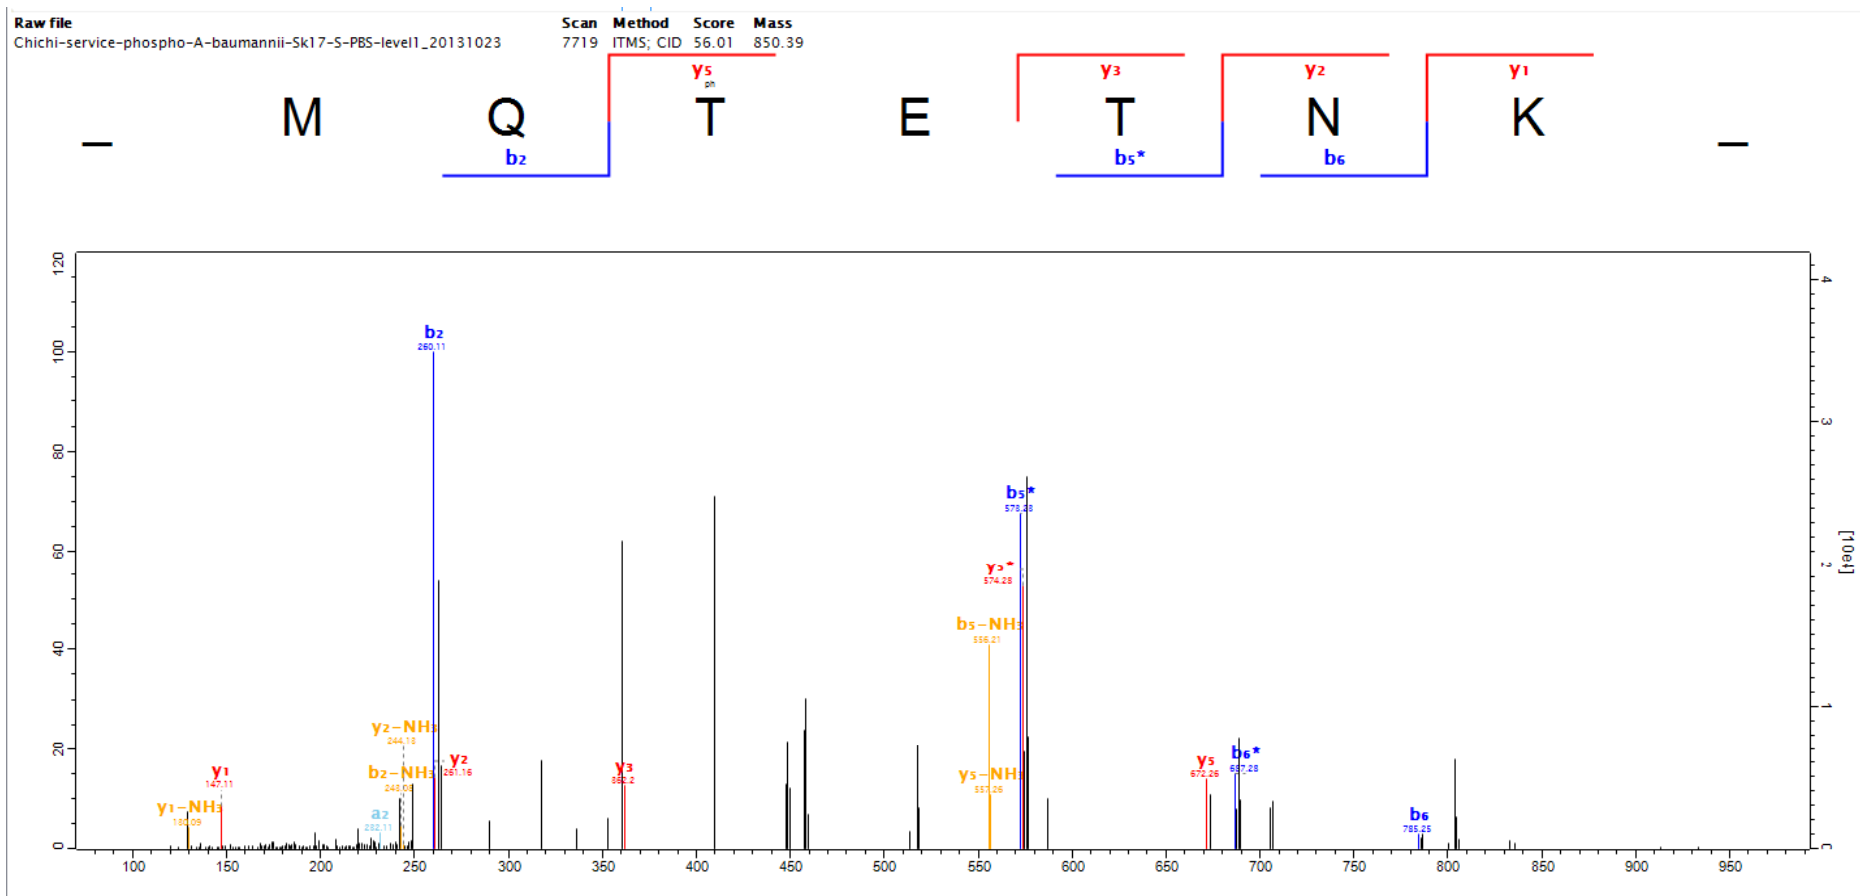

153

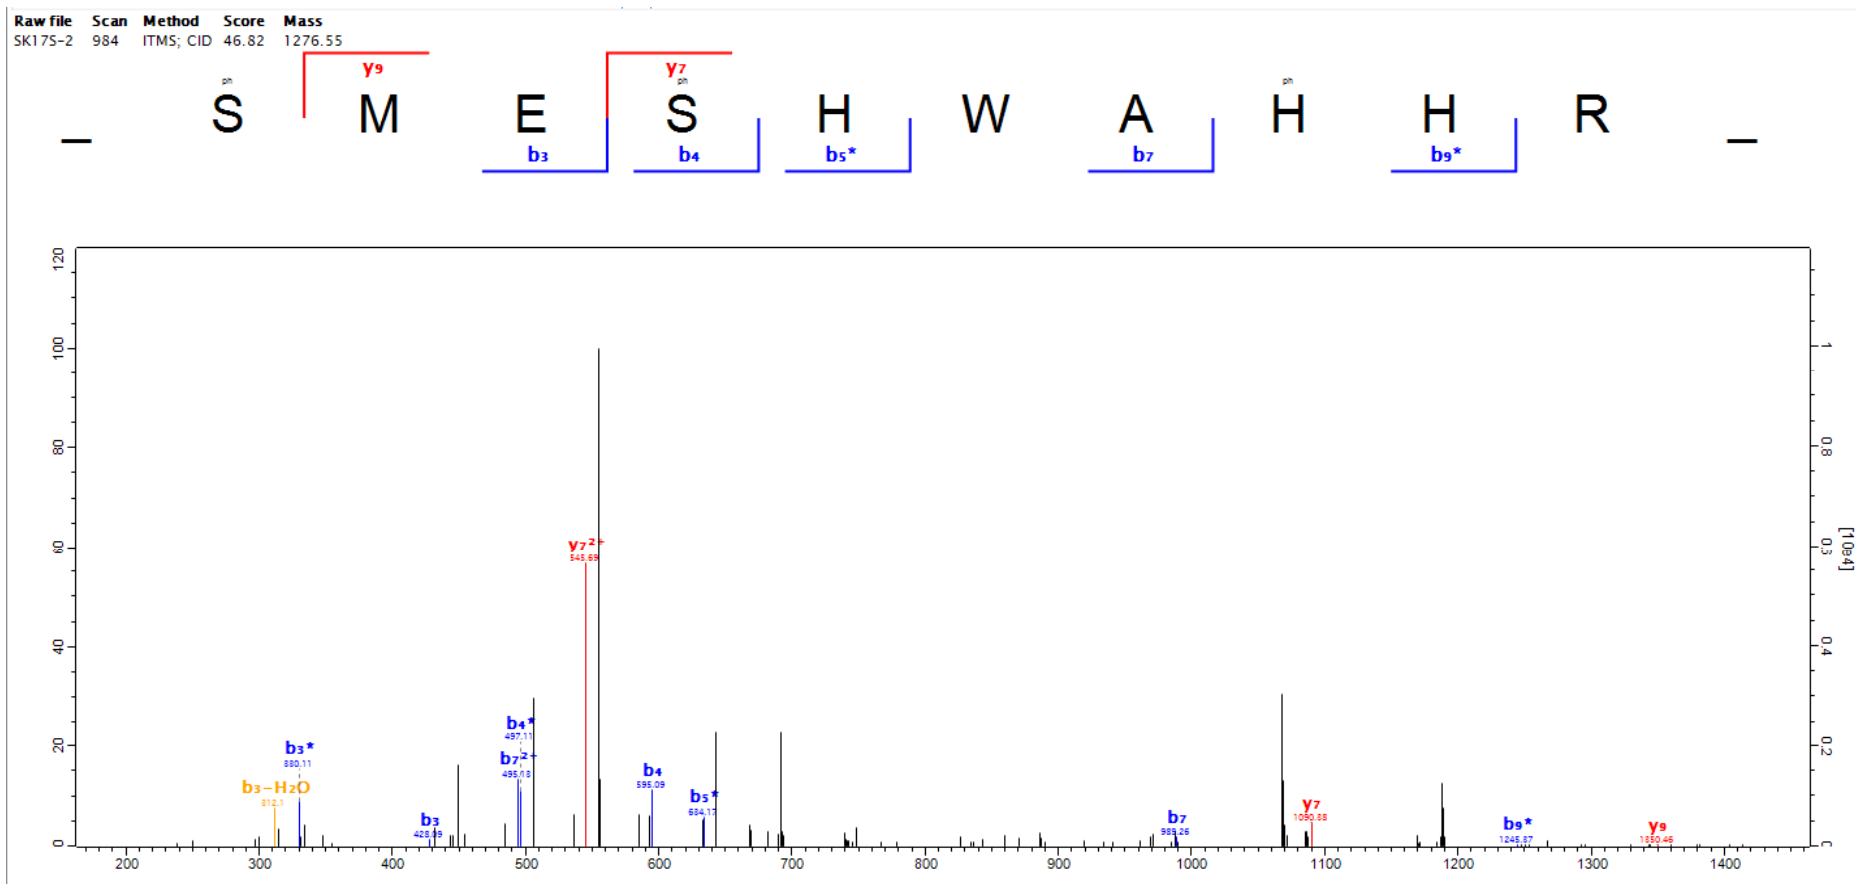

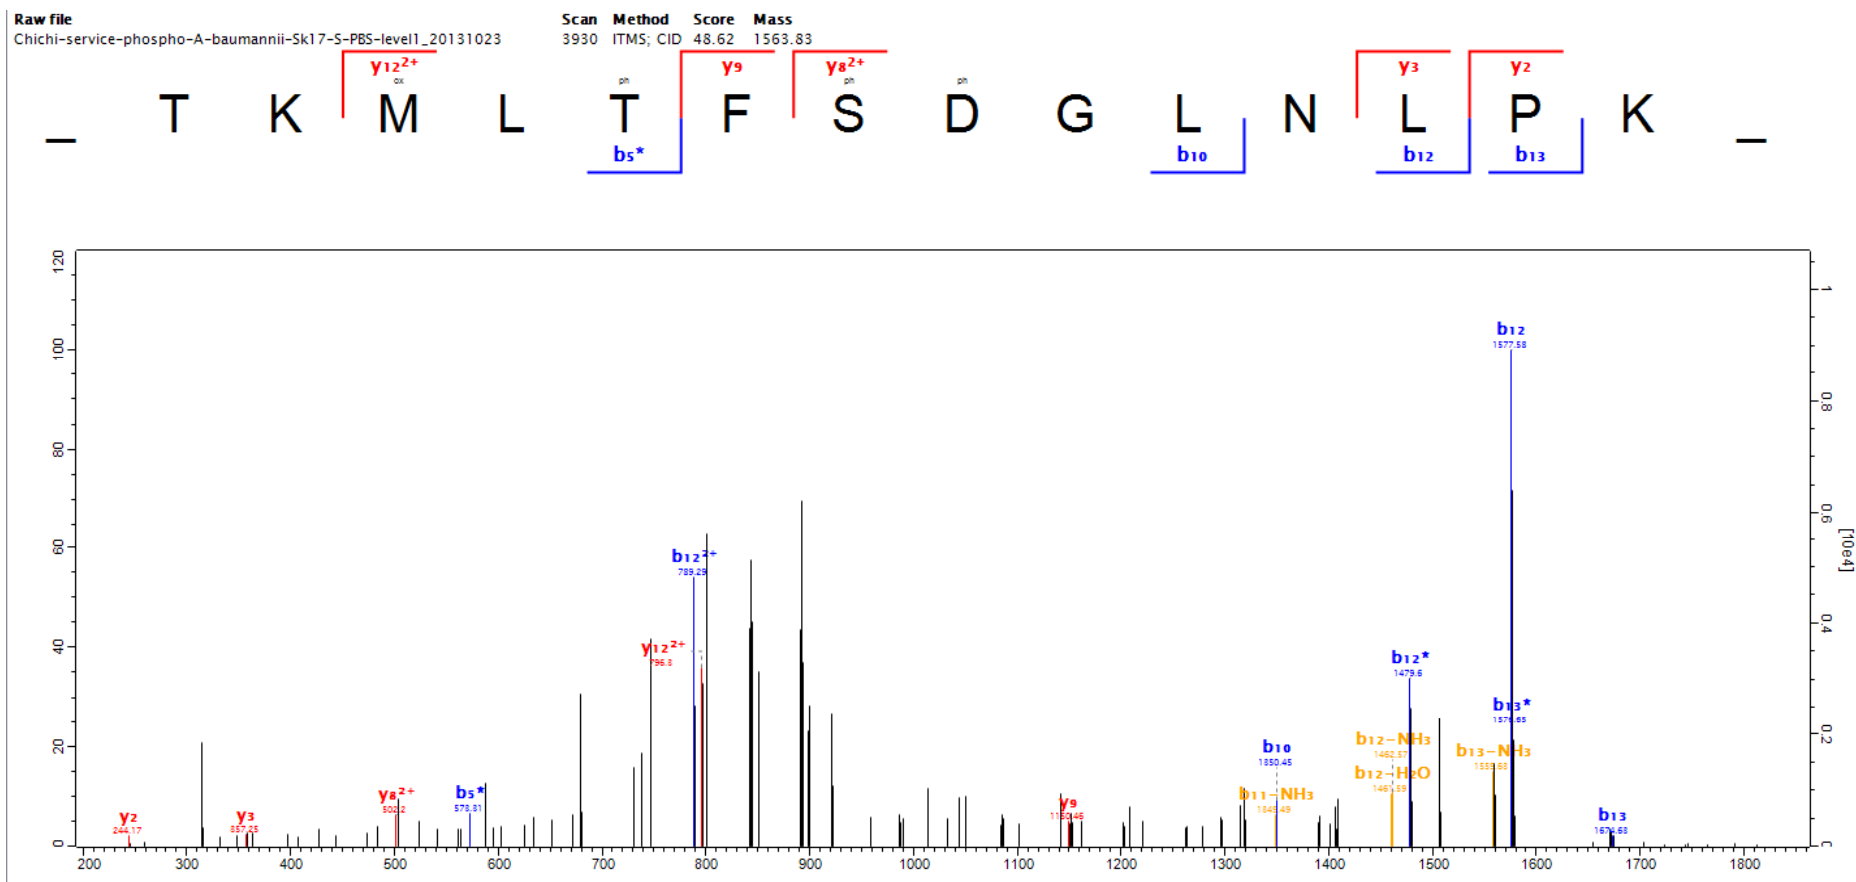

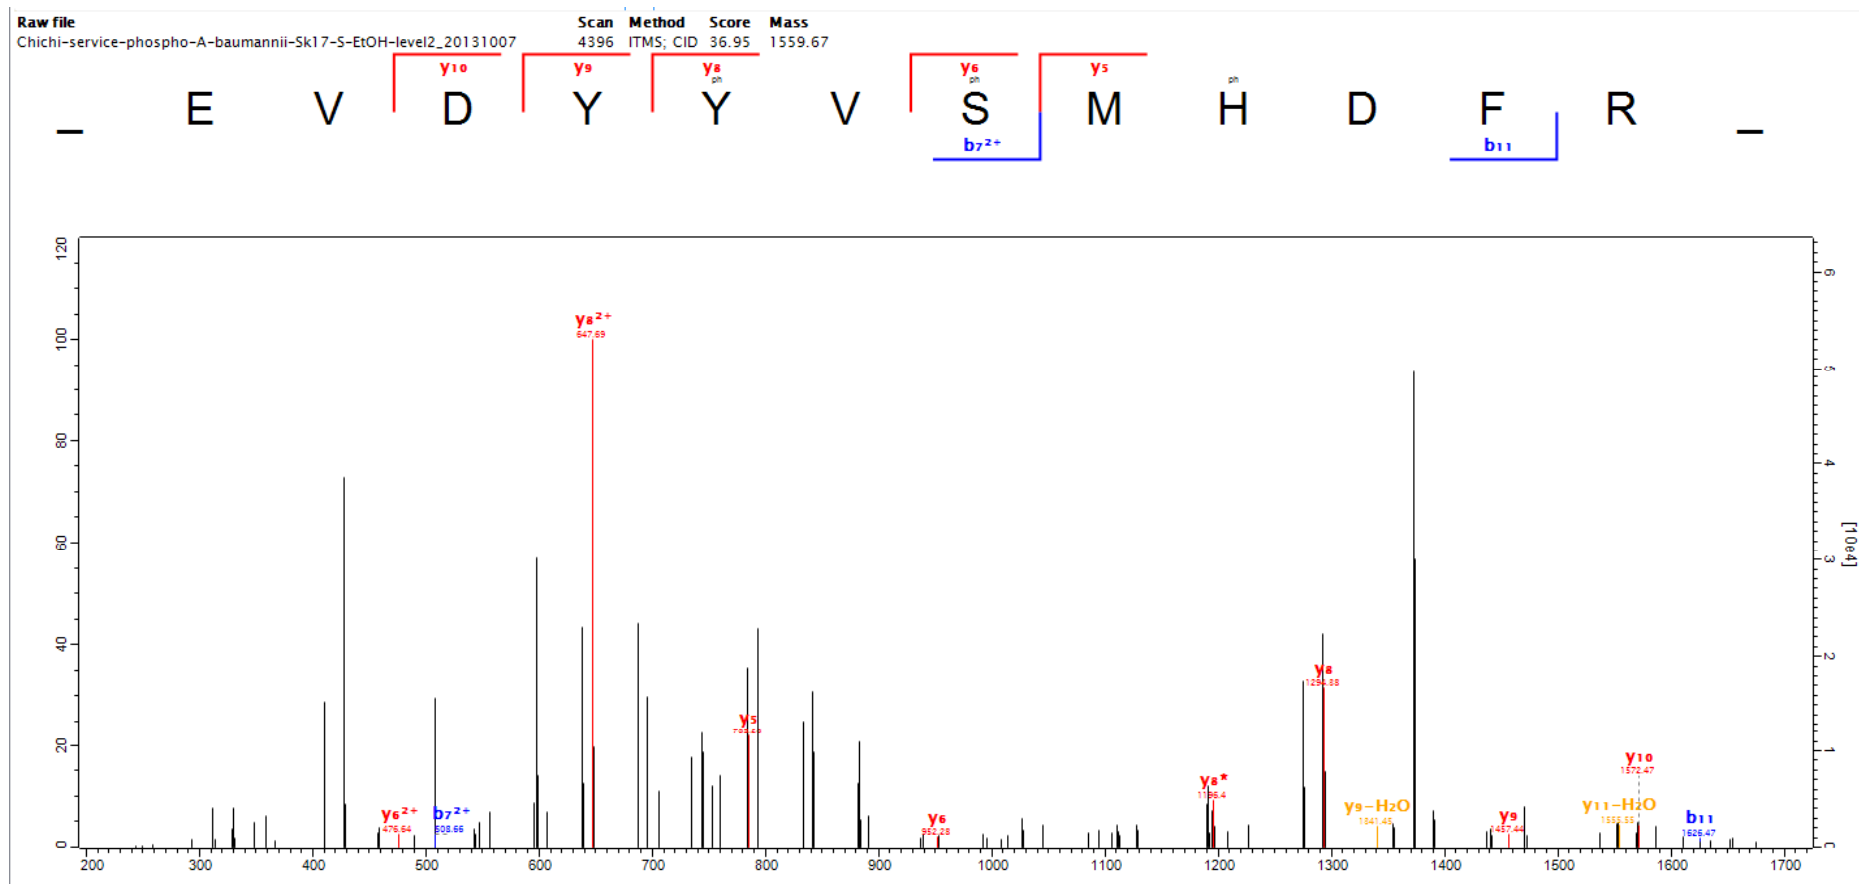



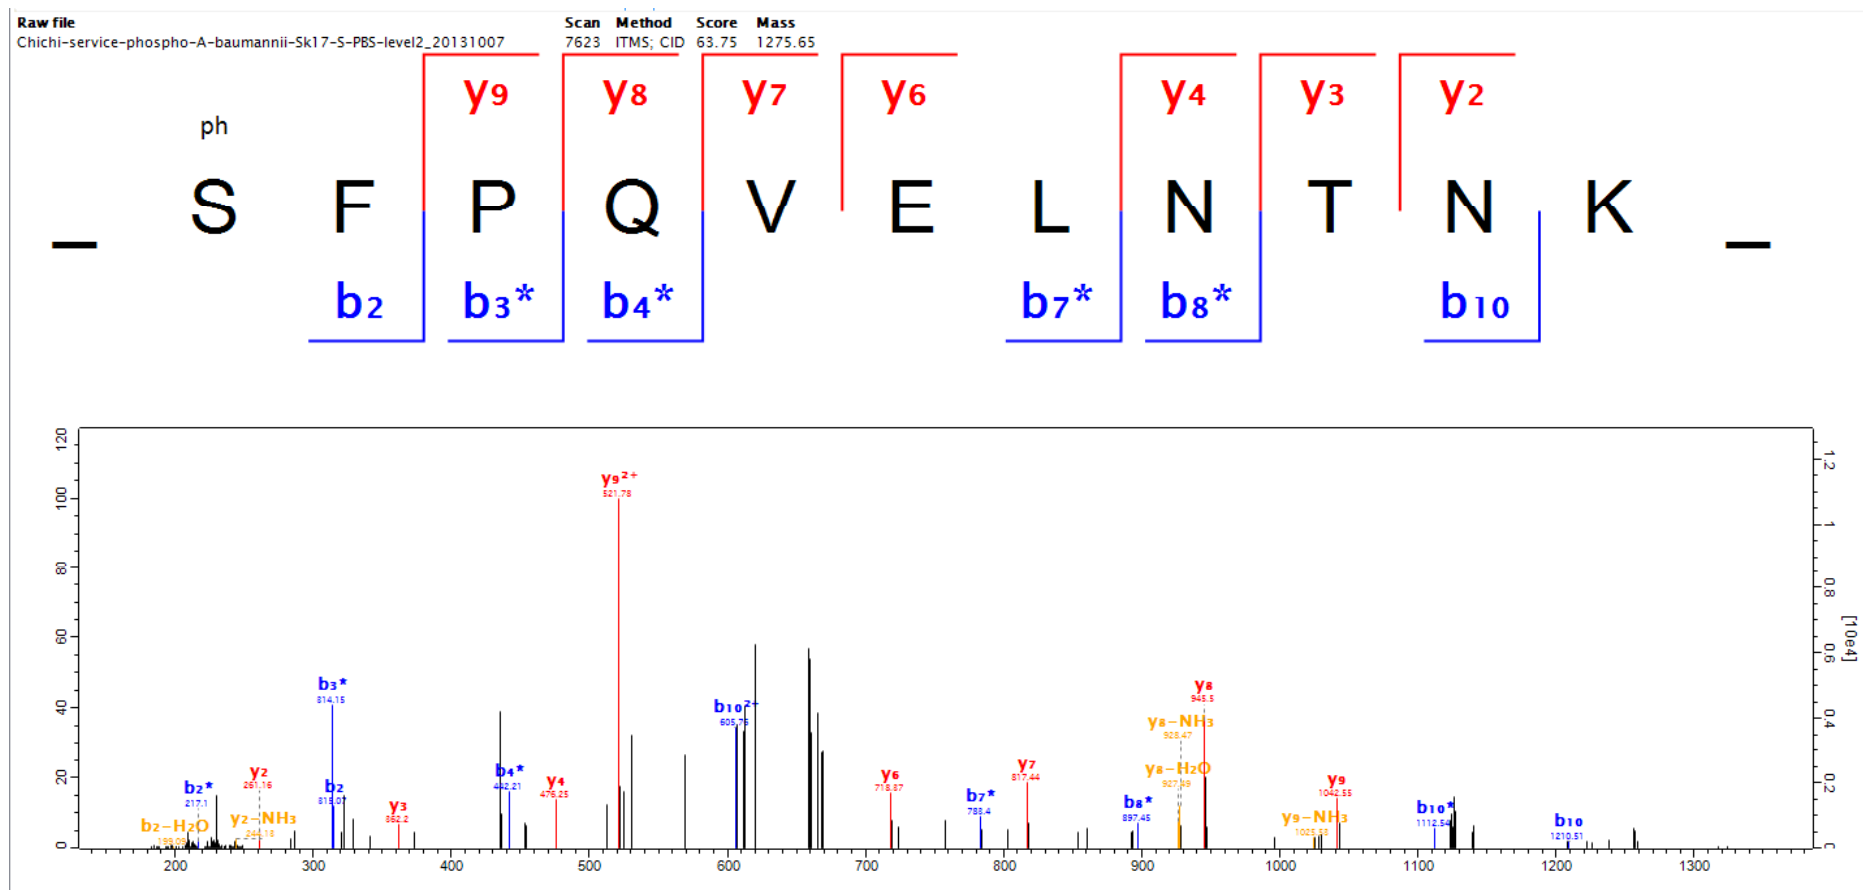

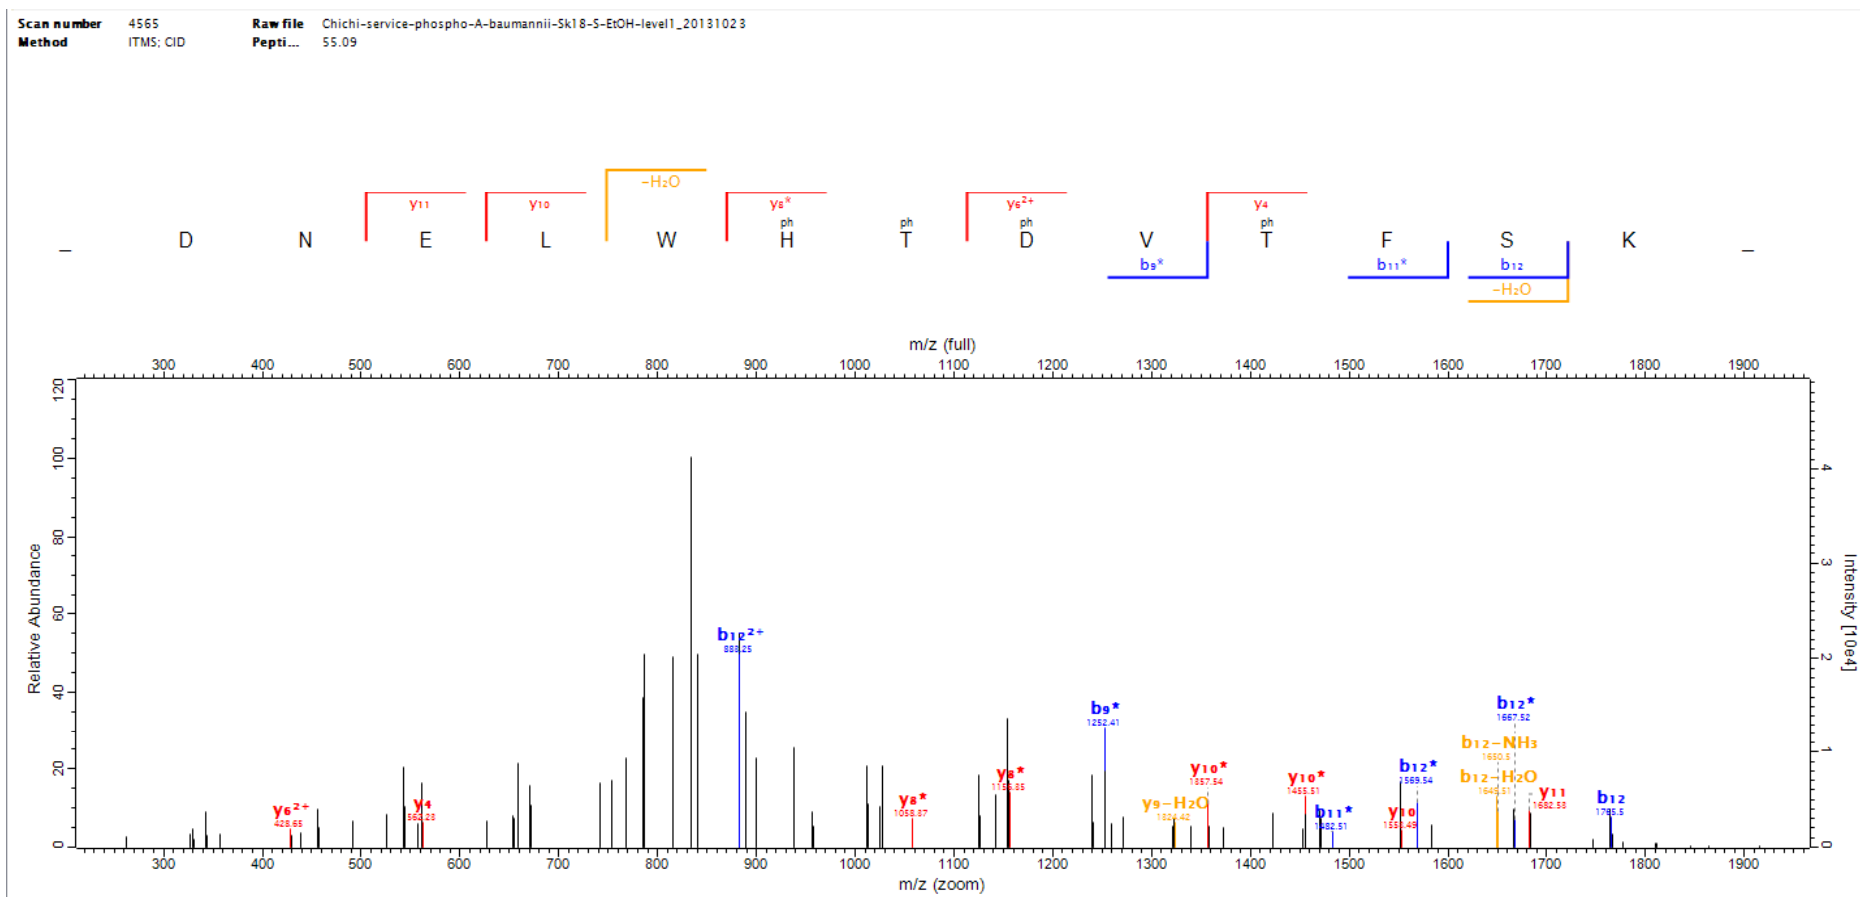

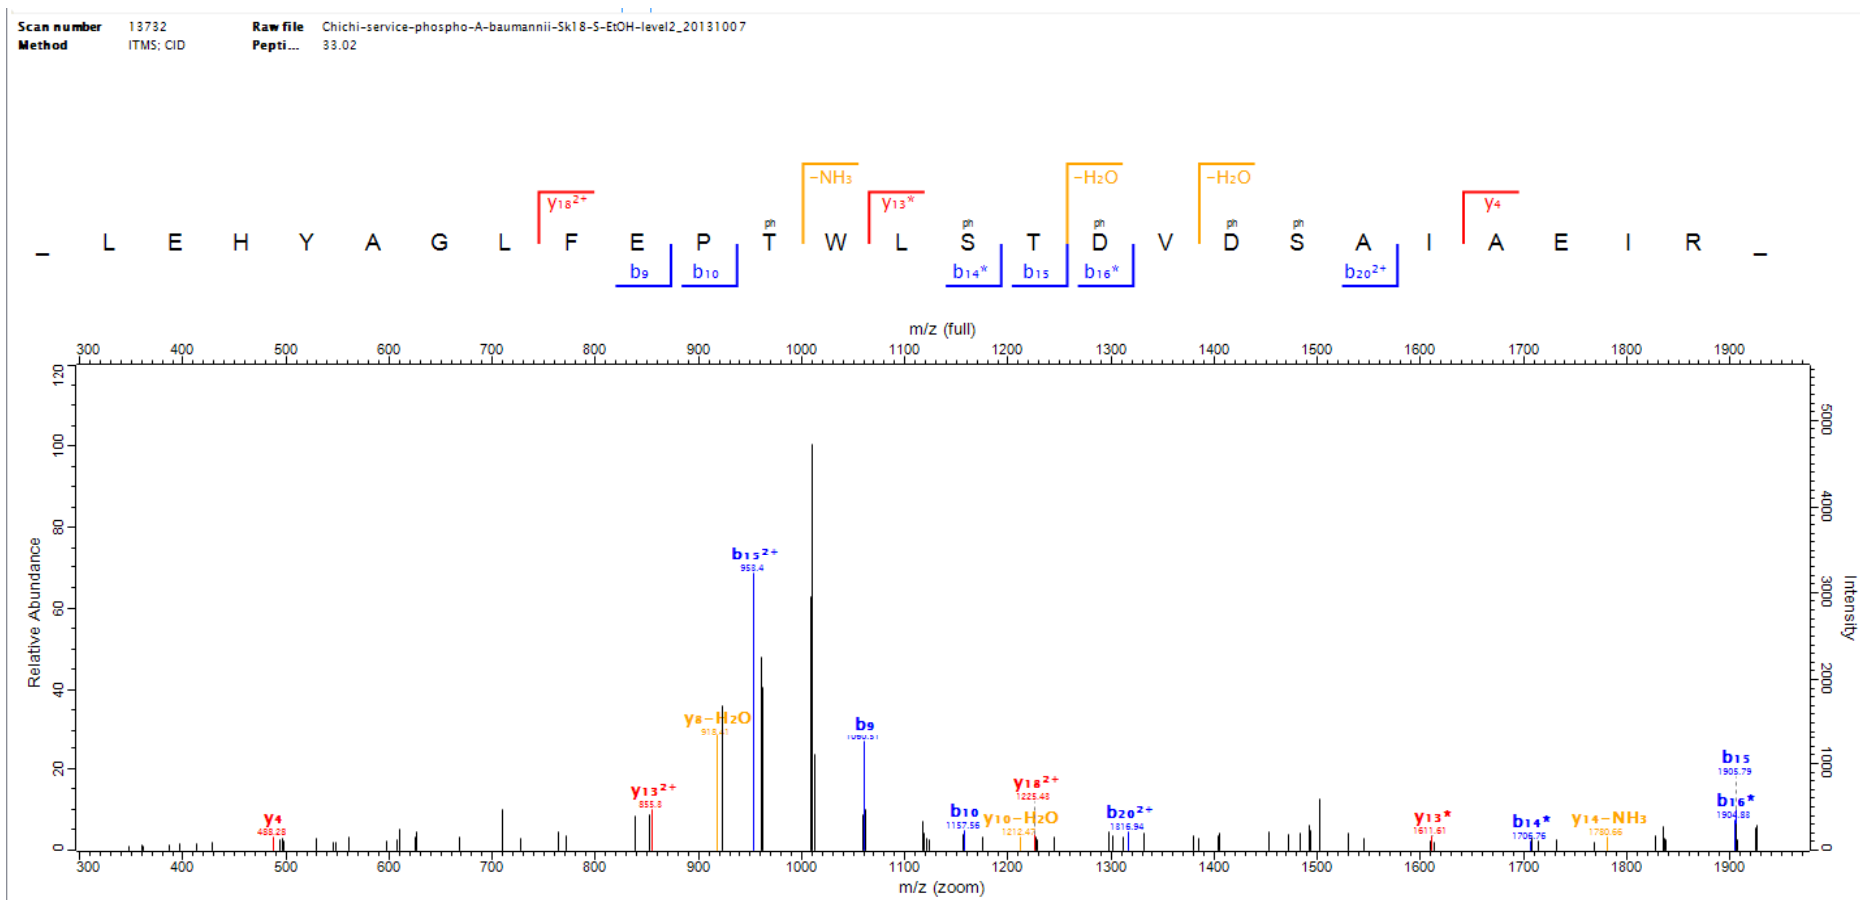

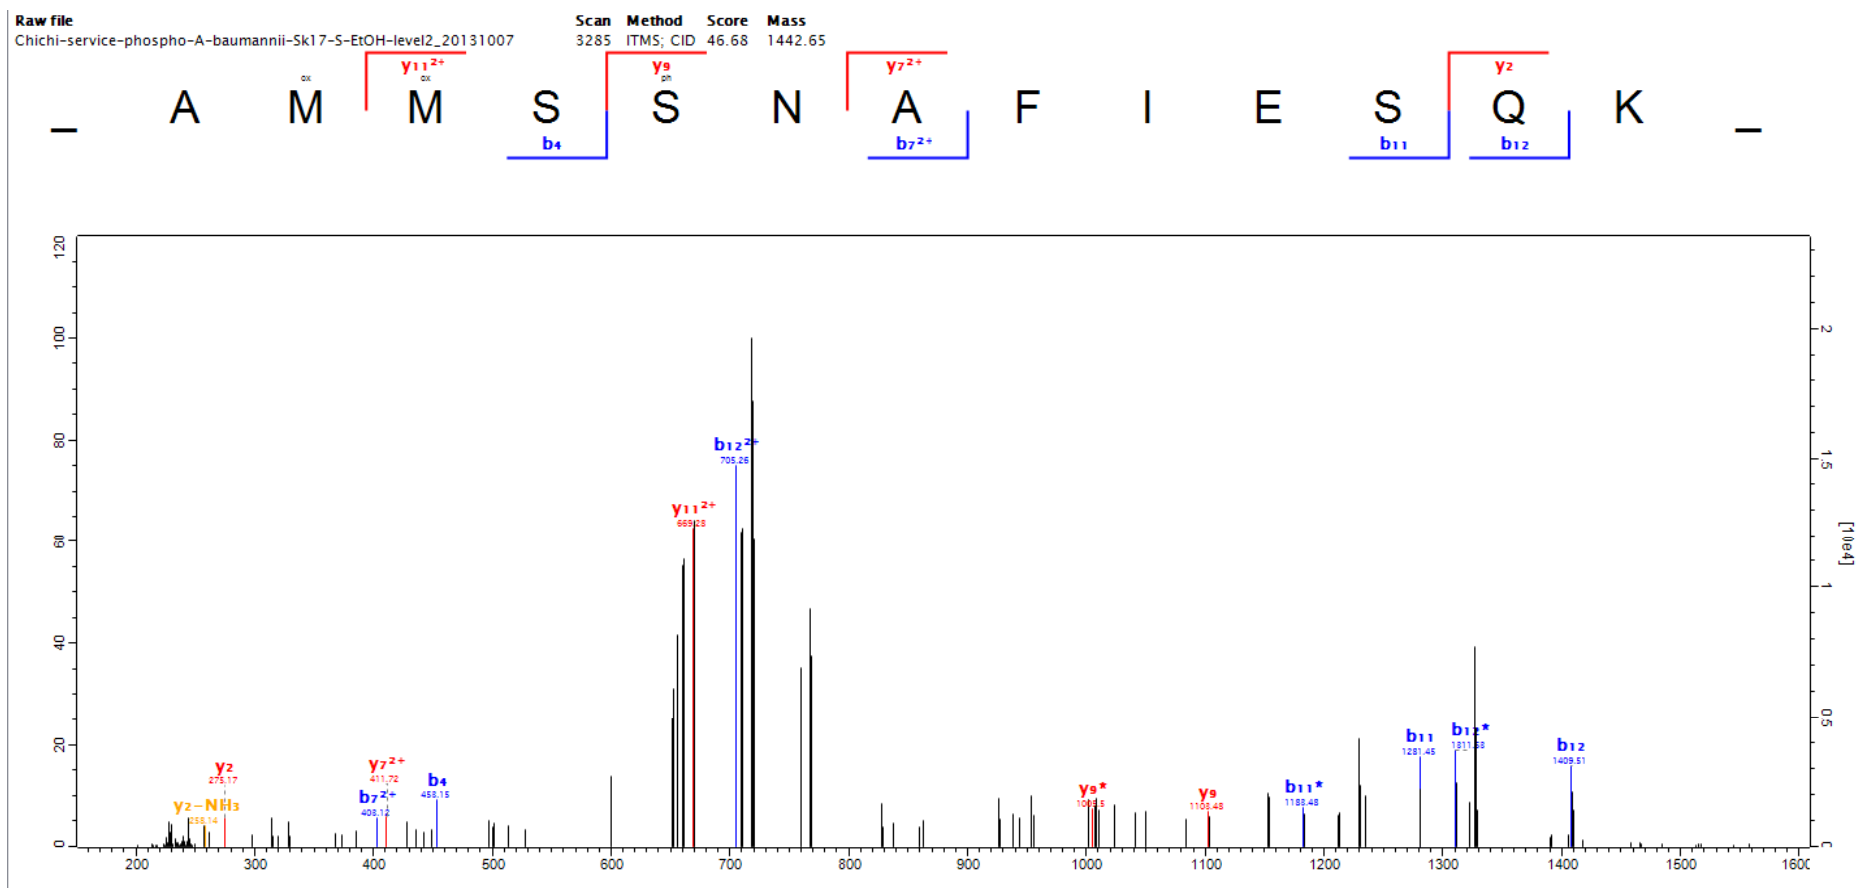

160-1

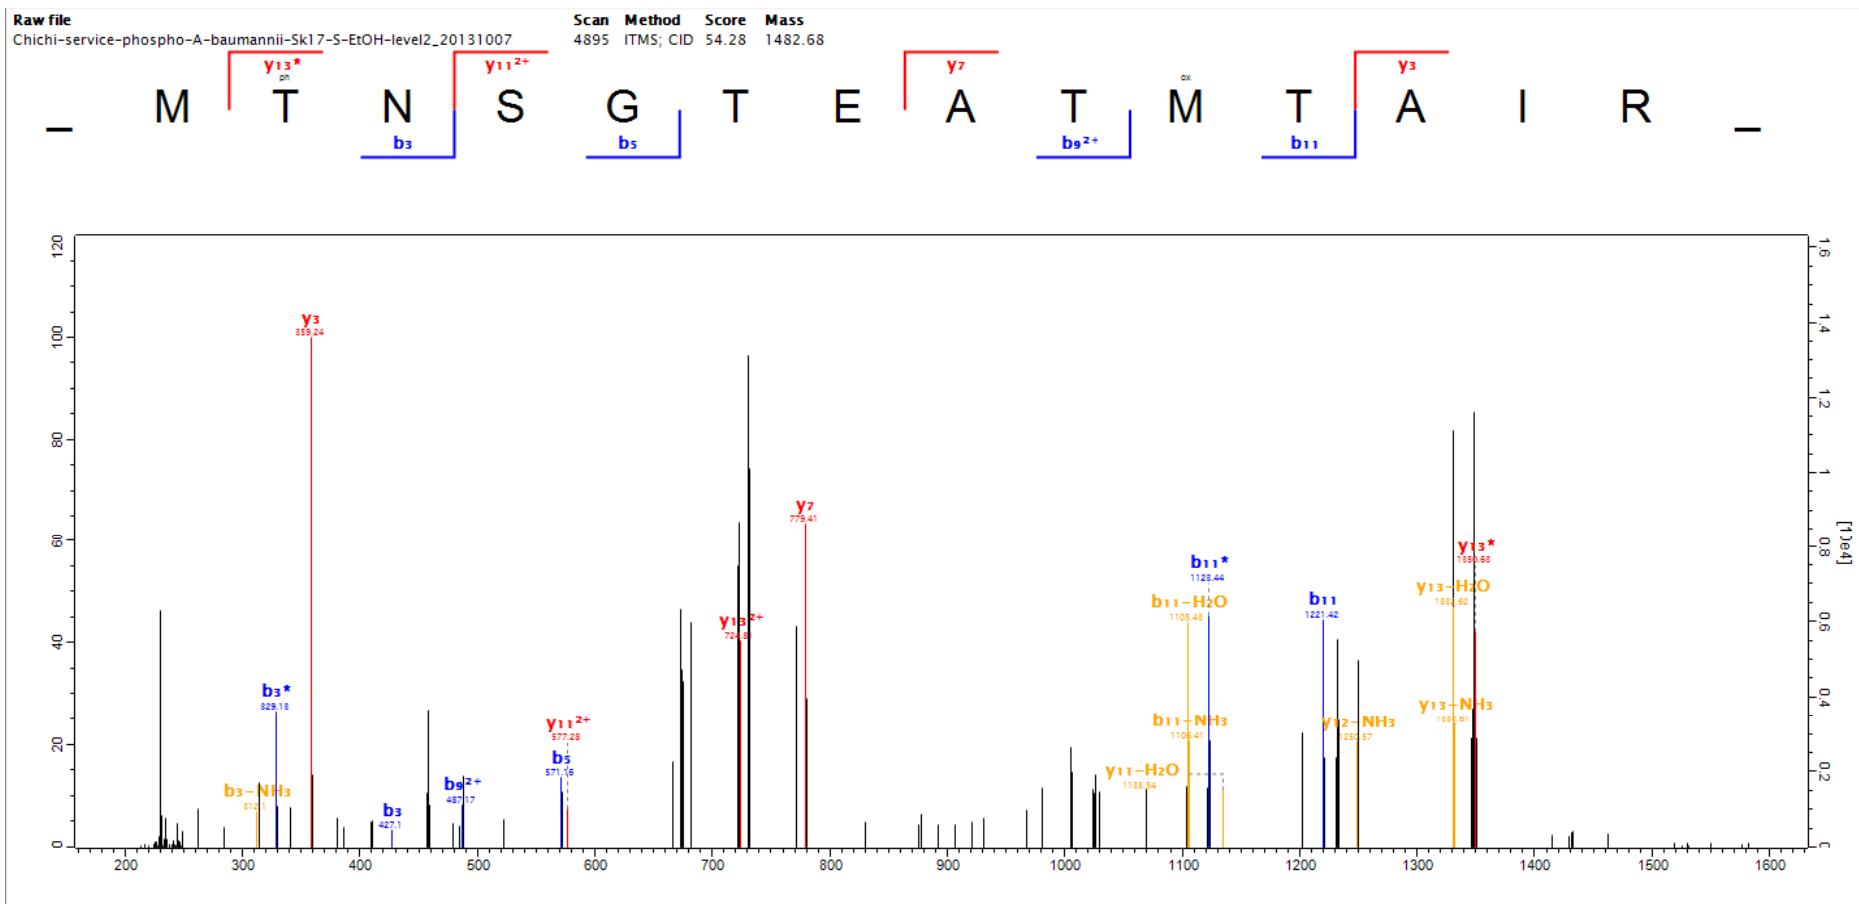

# 160-2

Scan number 3216 Raw file Chichi-service-phospho-A-baumannii-Sk17-5-EtOH-level2\_20131007  
 Method ITMS: CID Pepti... 58.48

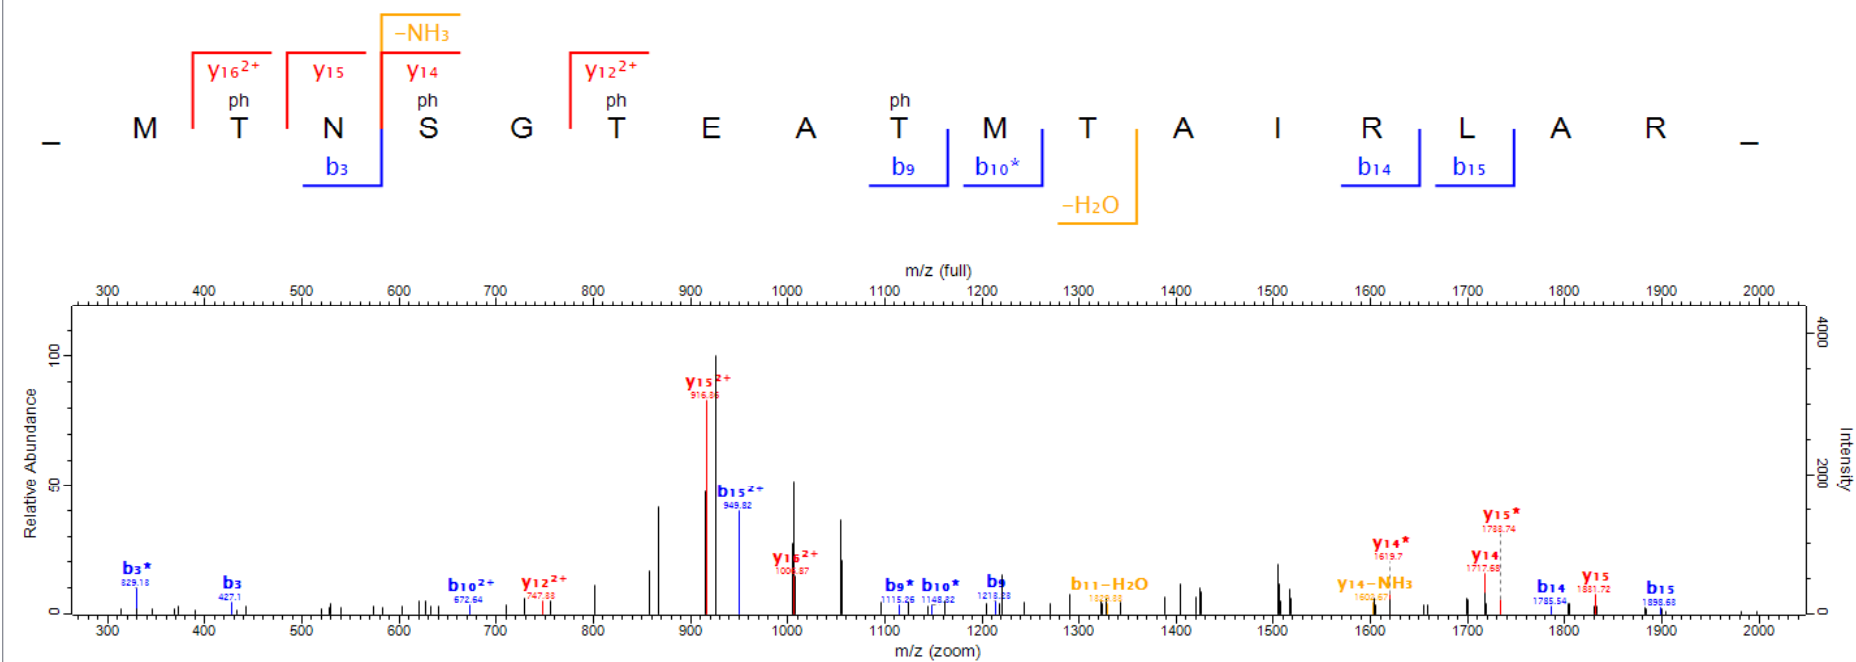

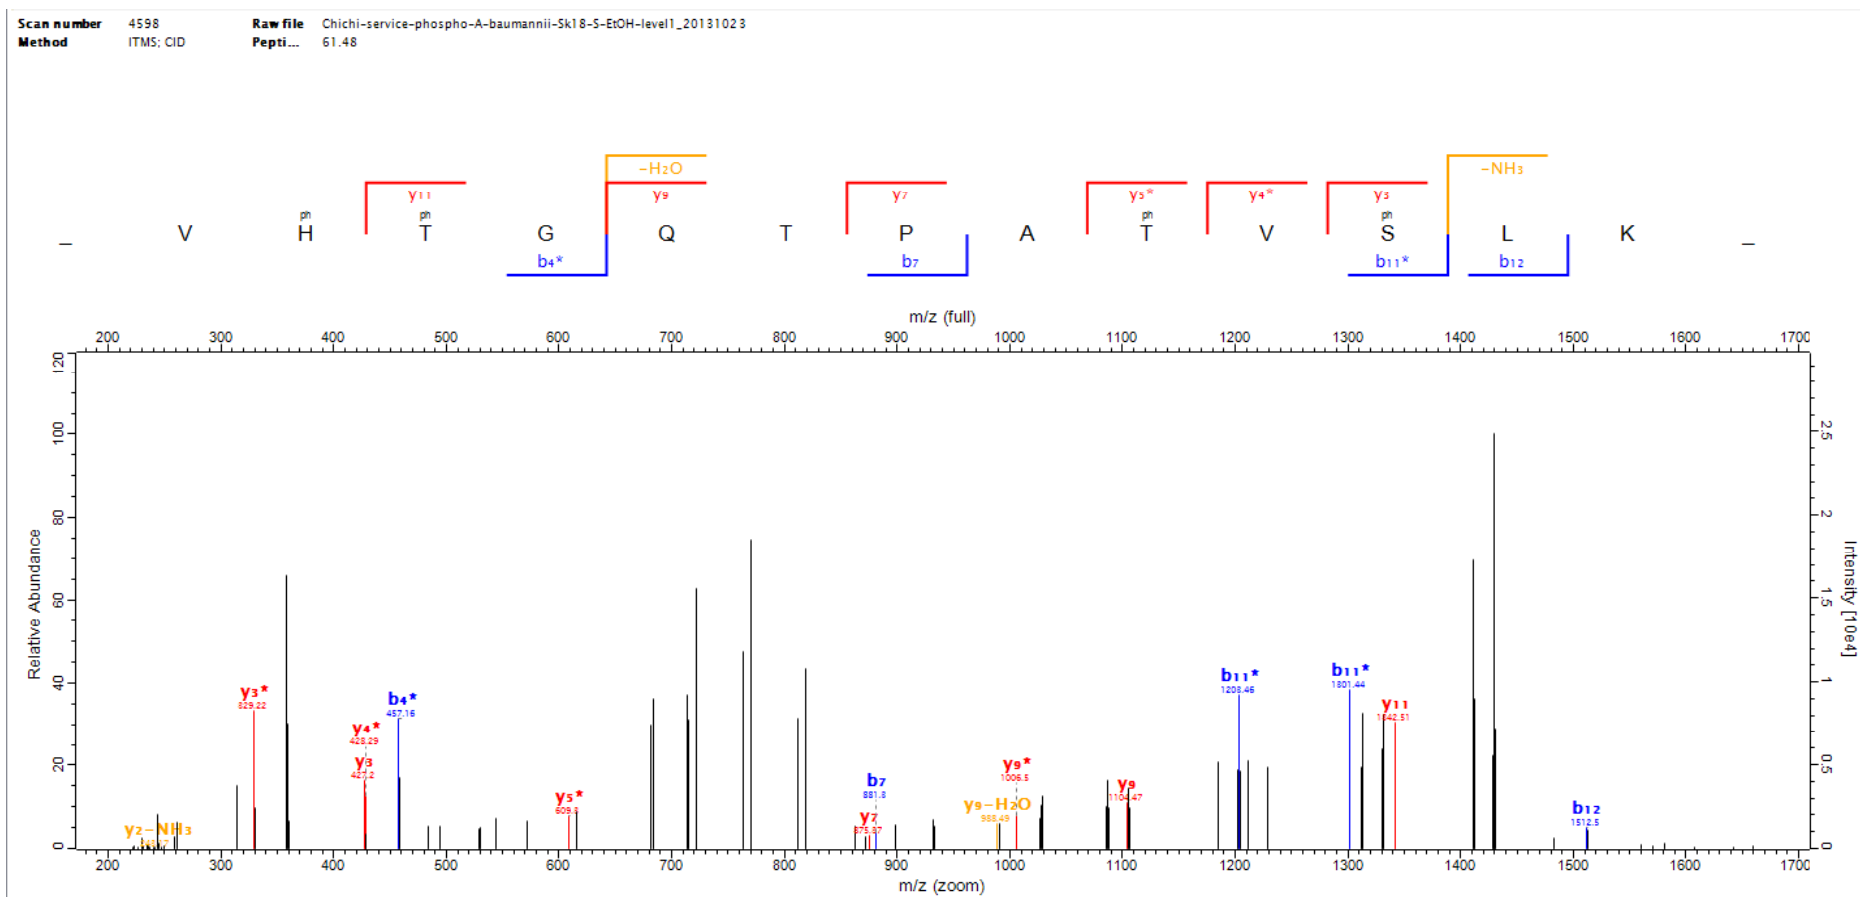

162-1

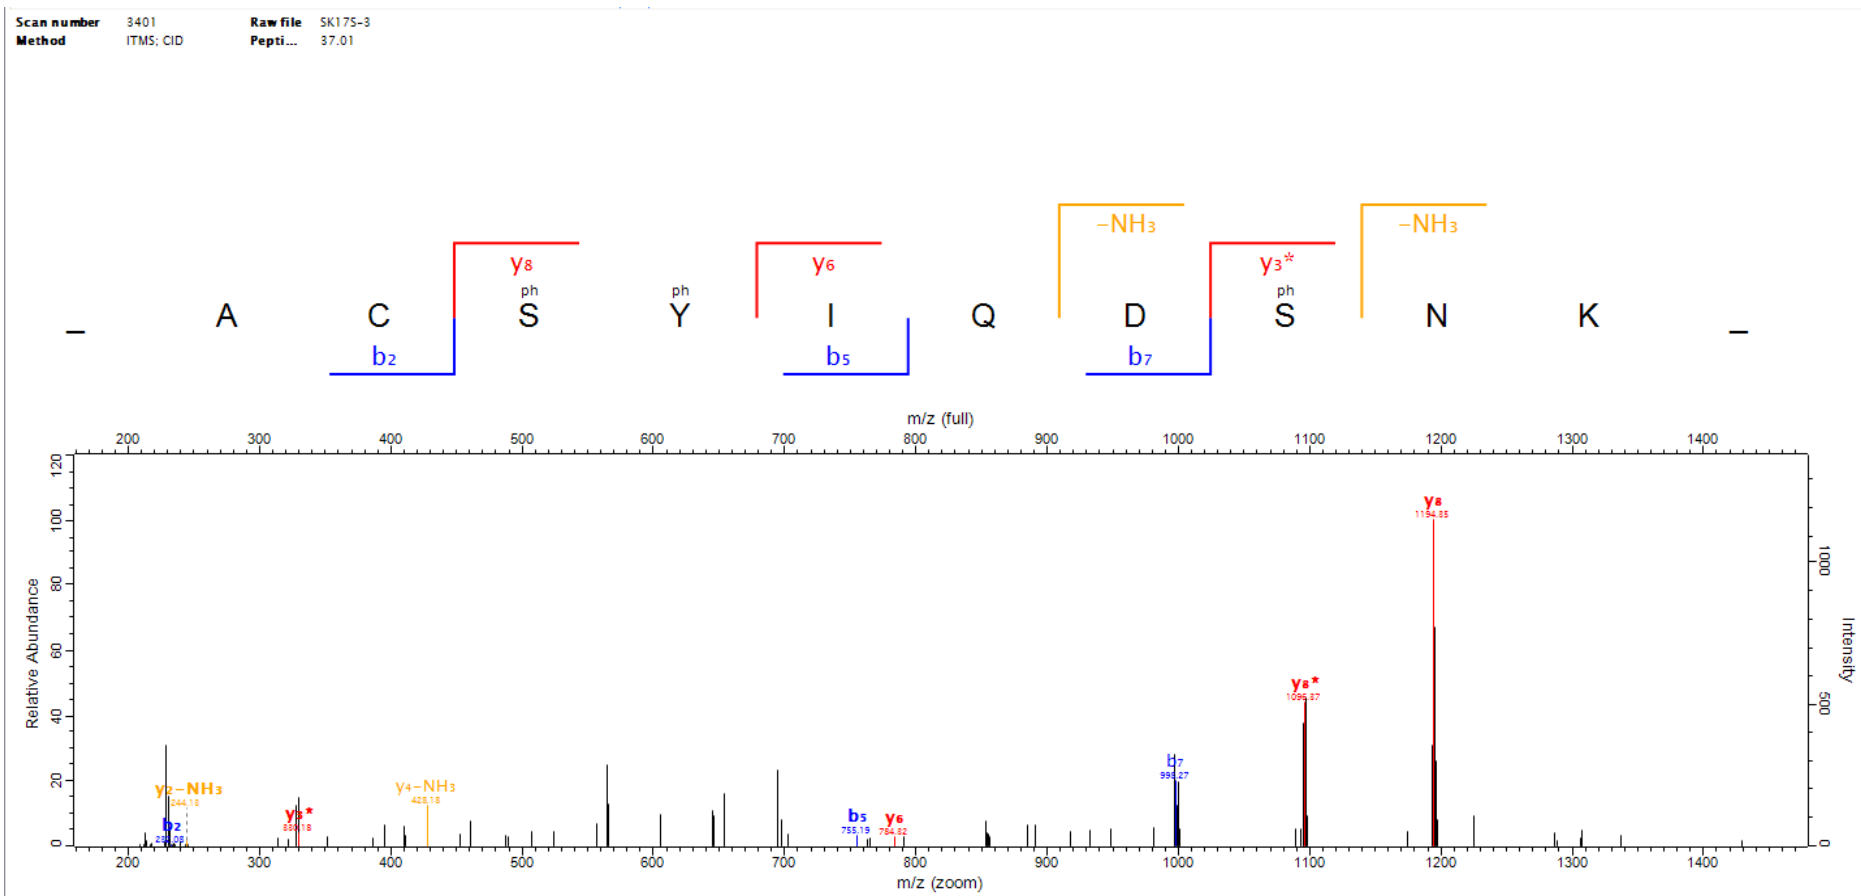



162-2

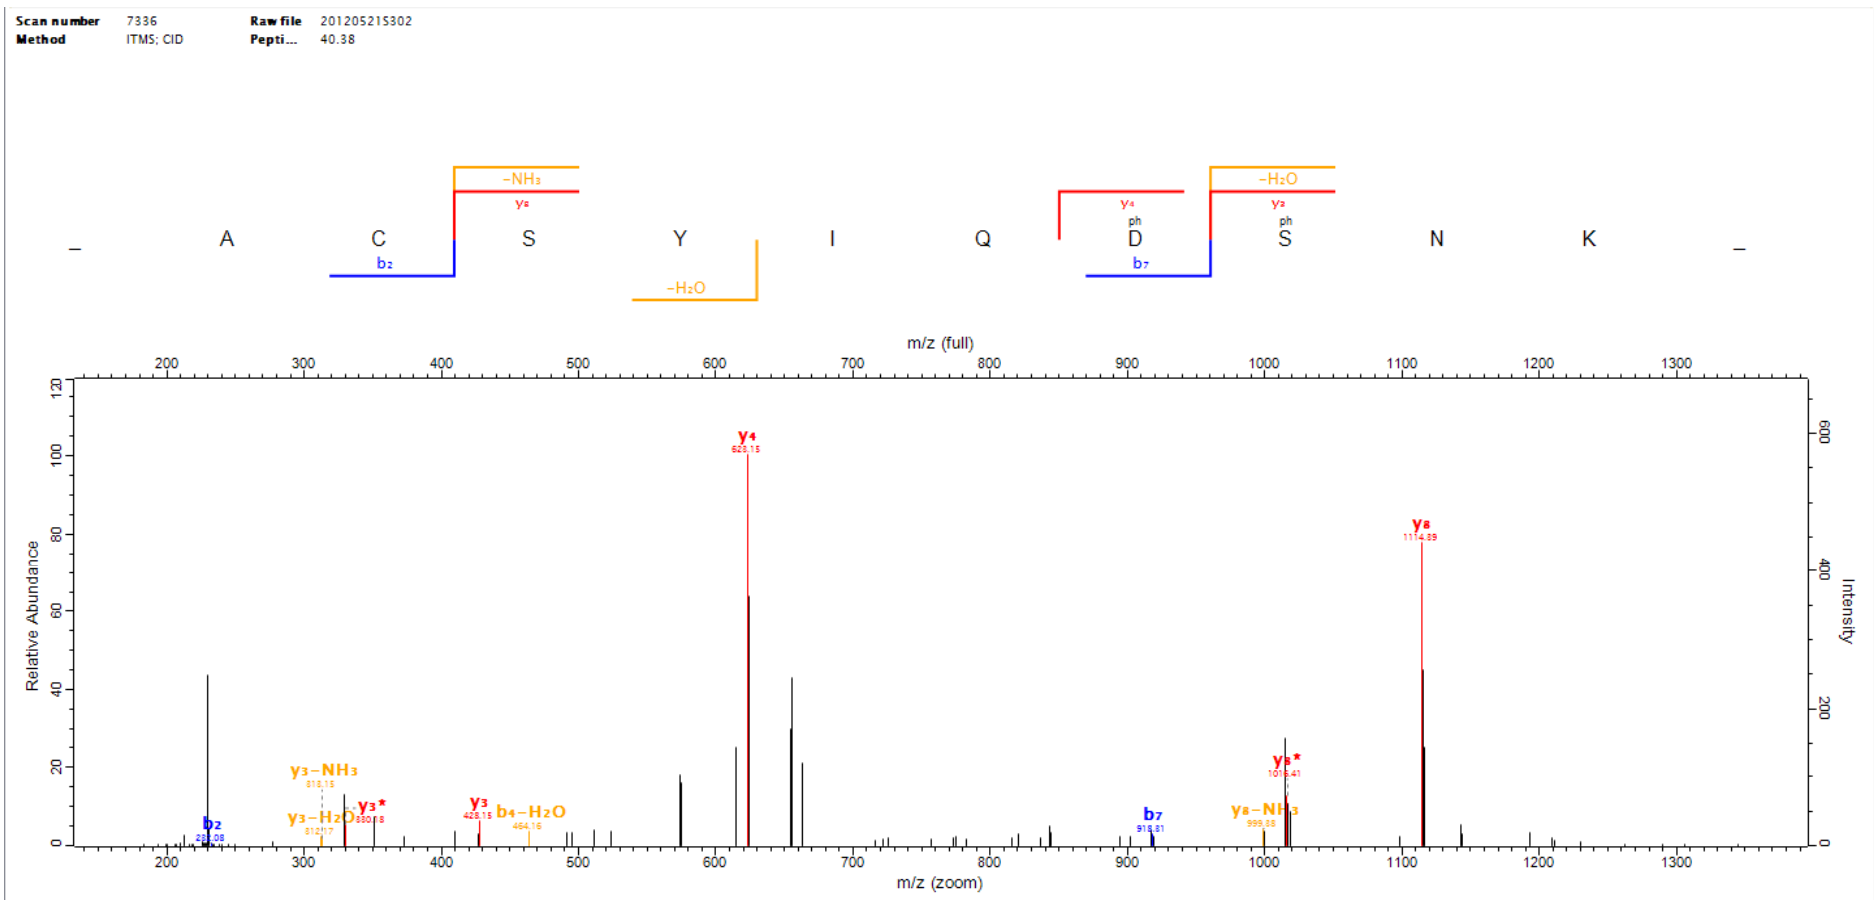

162-3

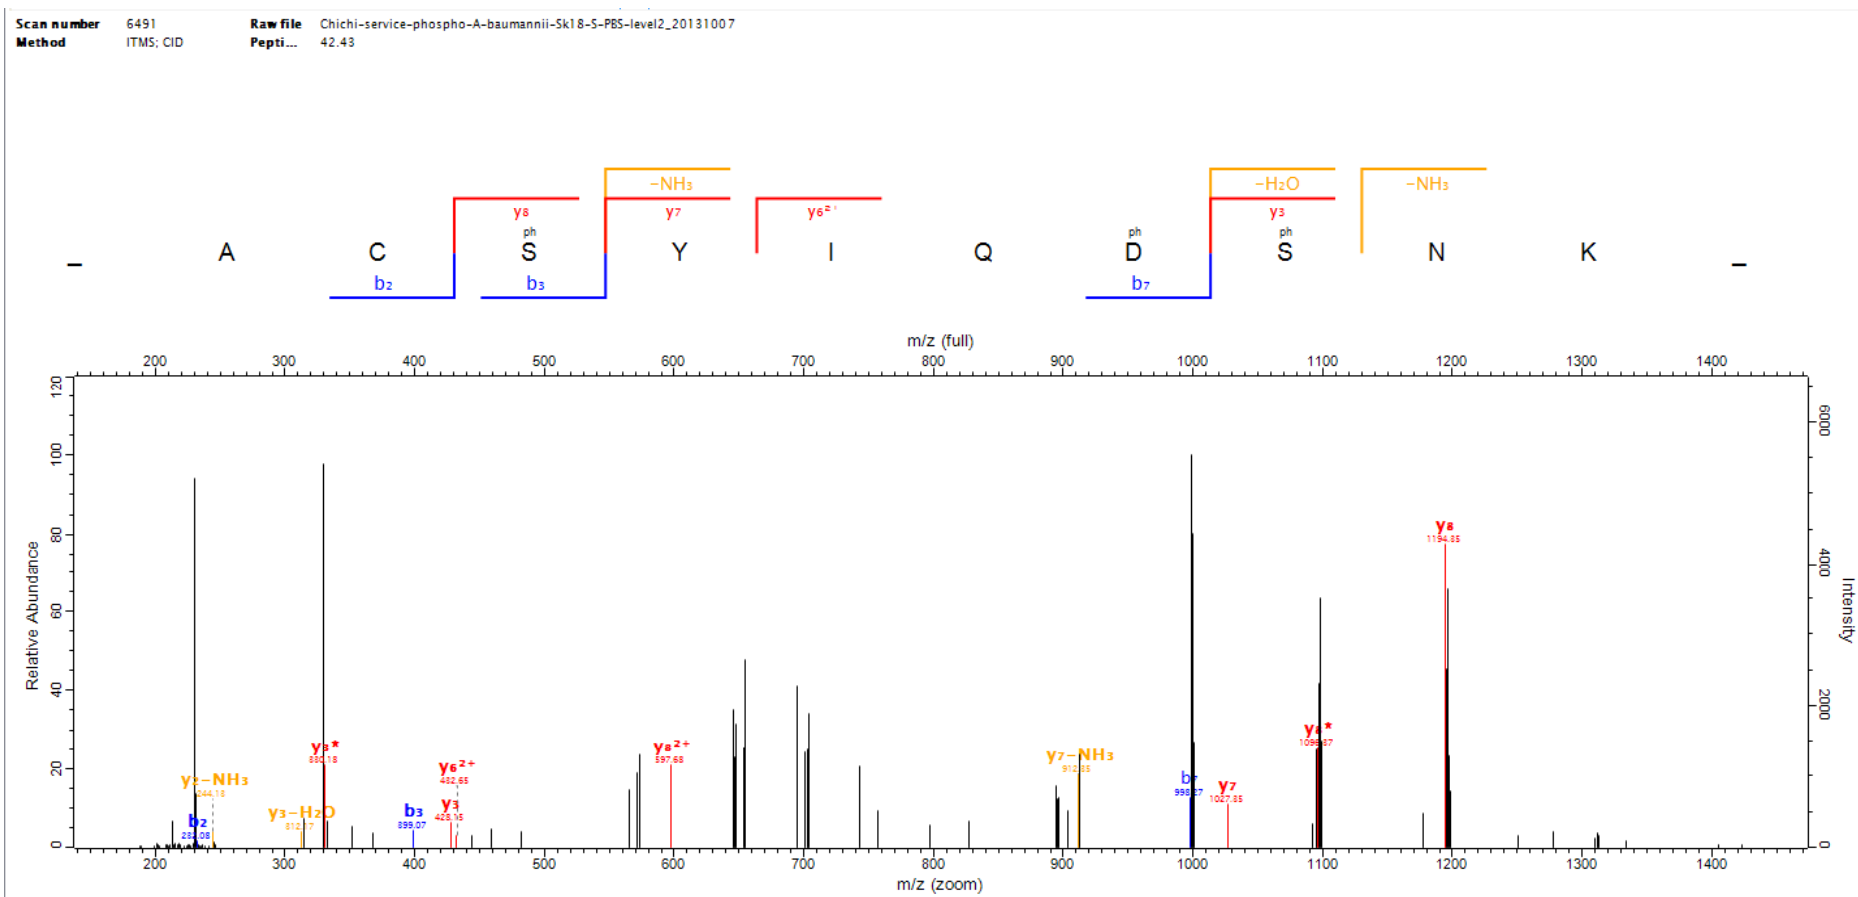

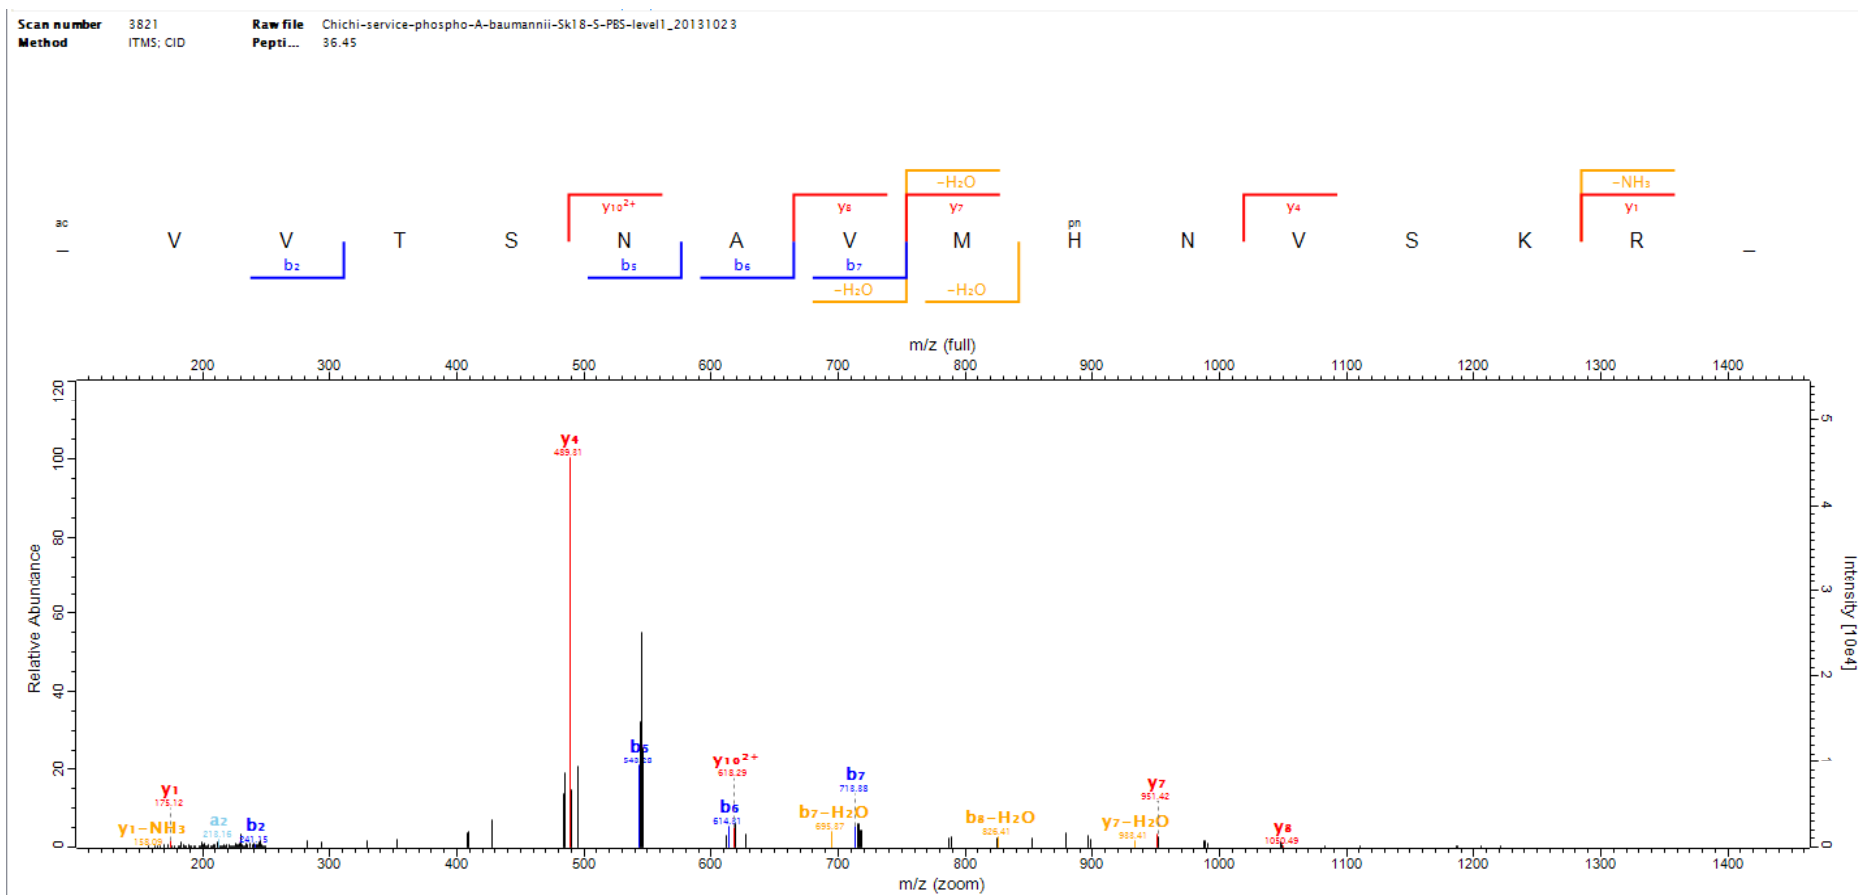

Scan number 5516 Raw file Chichi-service-phospho-A-baumannii-Sk17-5-PBS-level1\_20131023  
 Method ITMS: CID Peptide 47.75

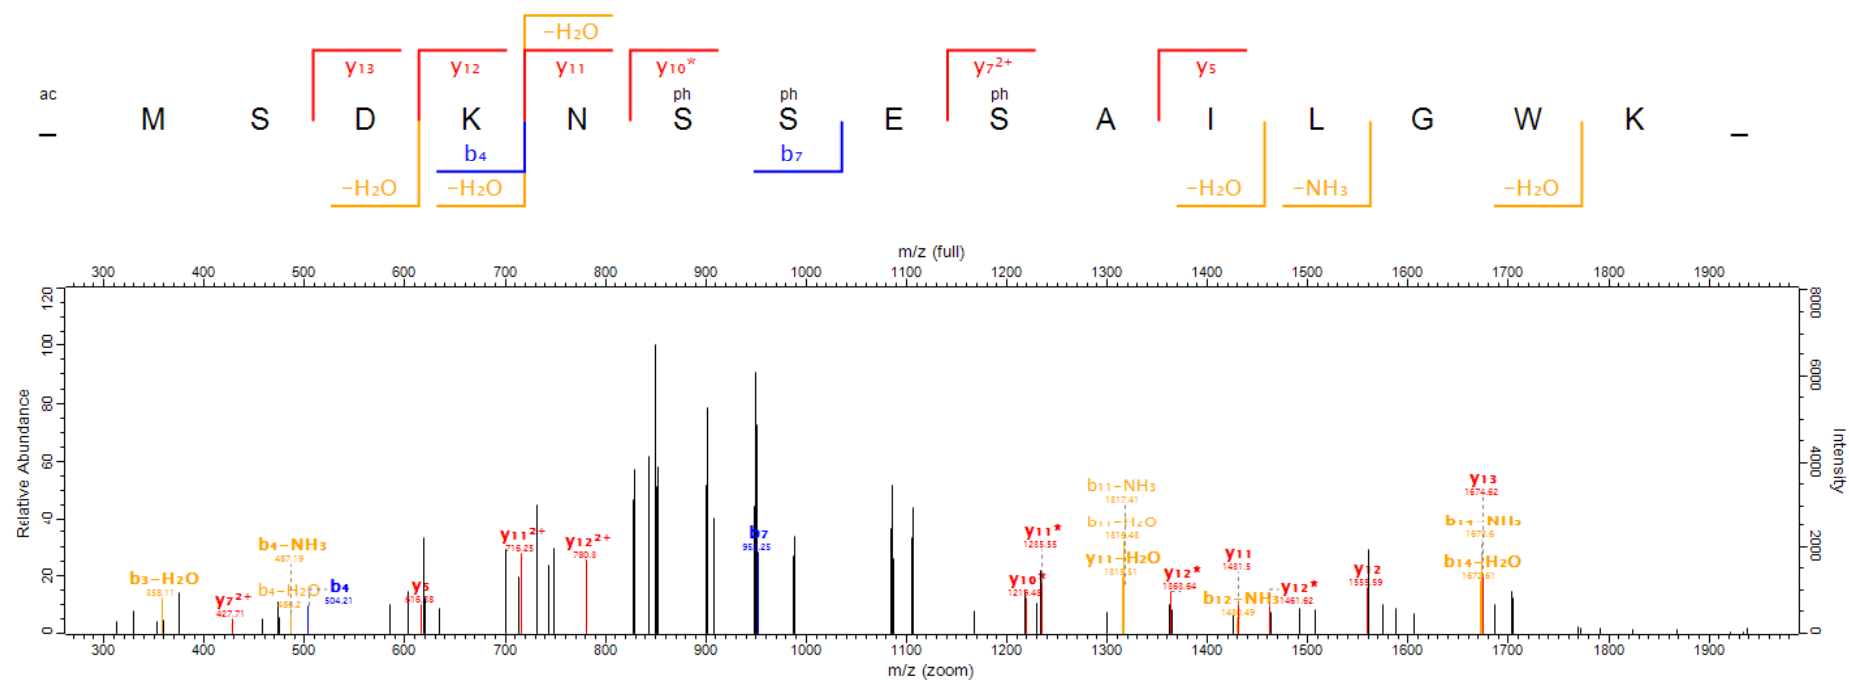

165-1

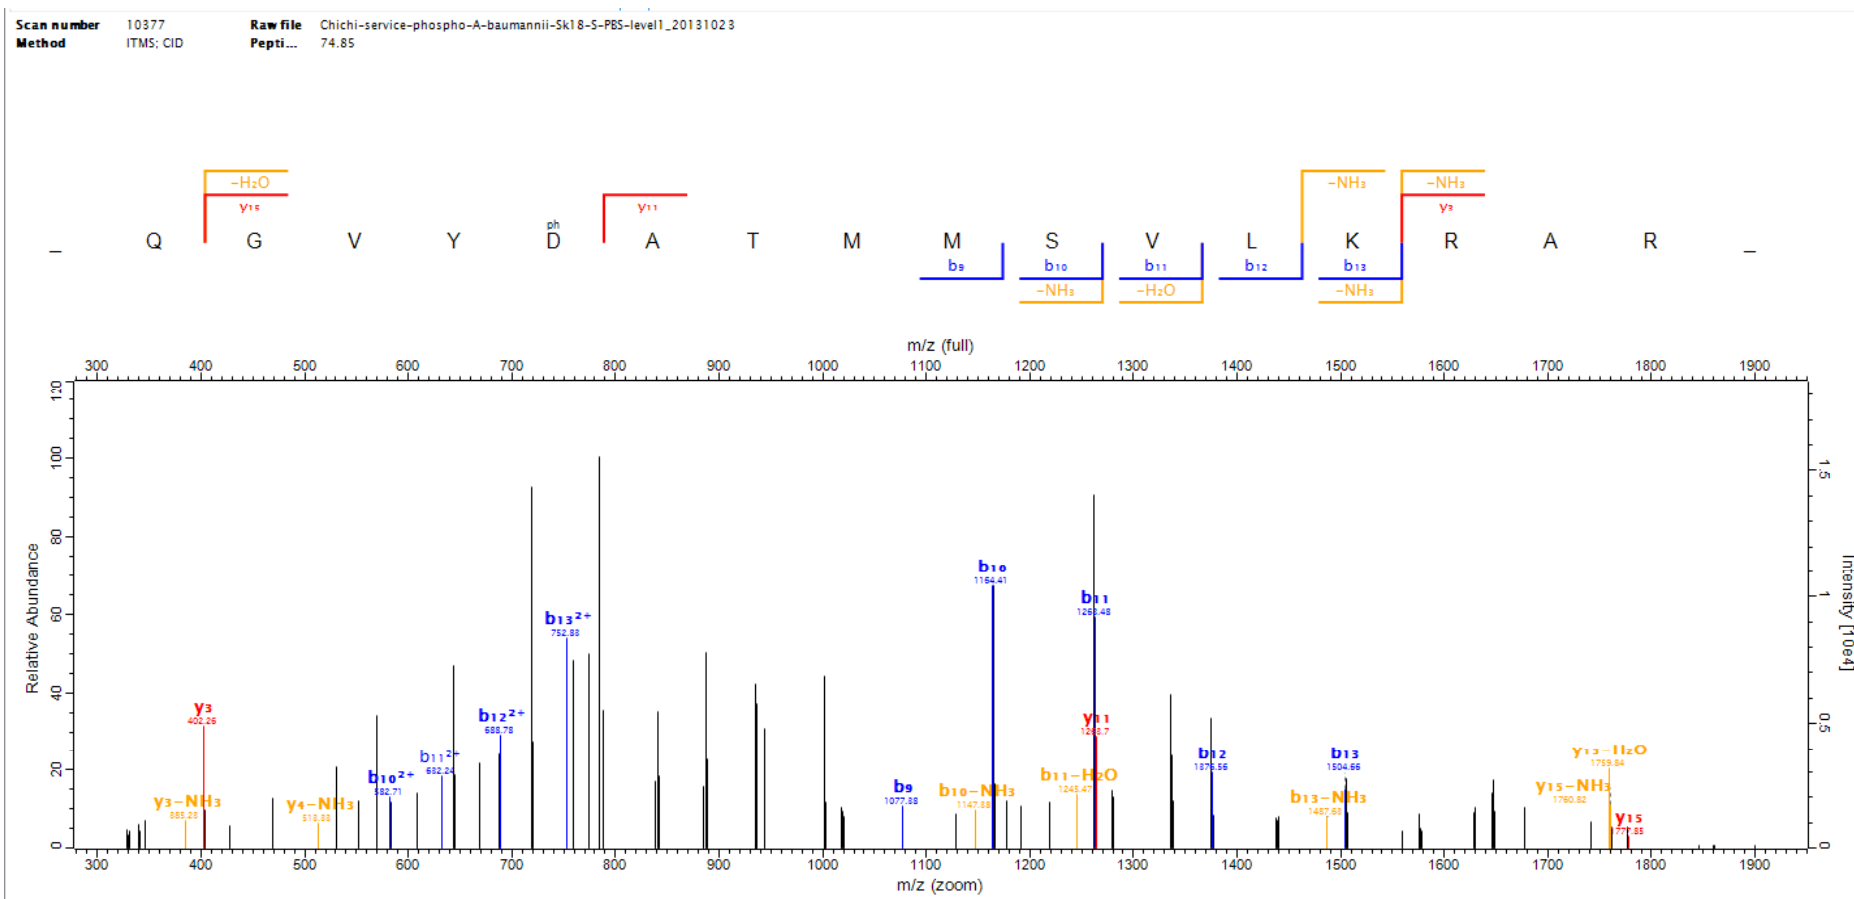

# 165-2

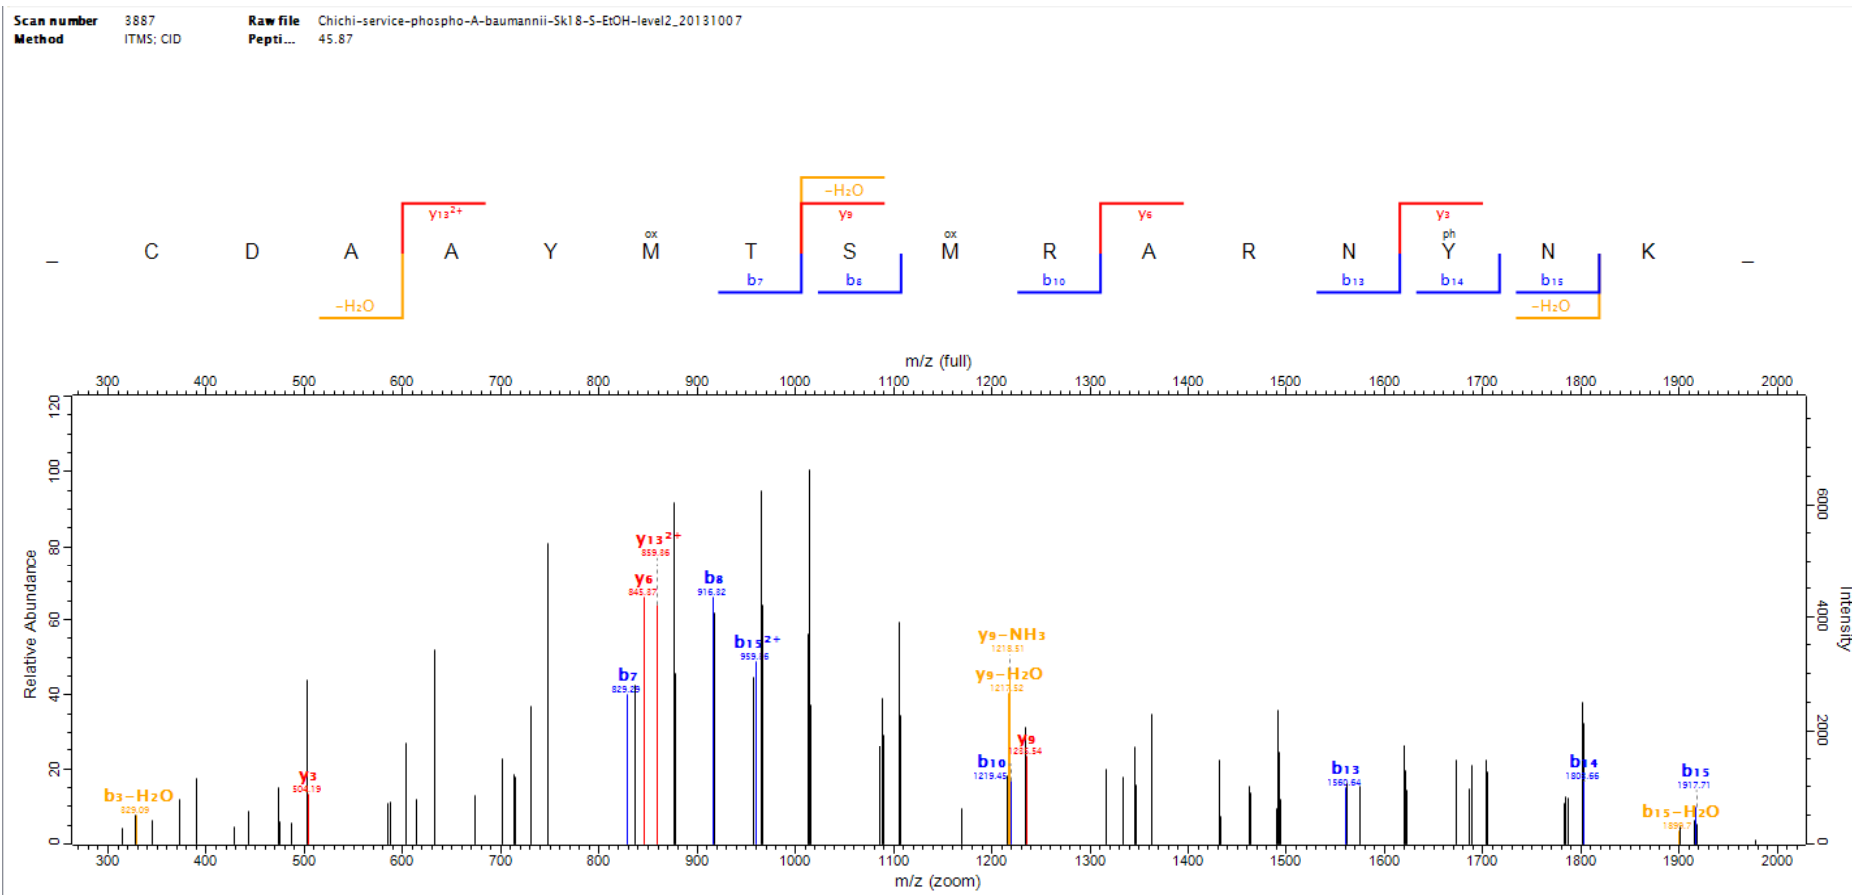

166-1

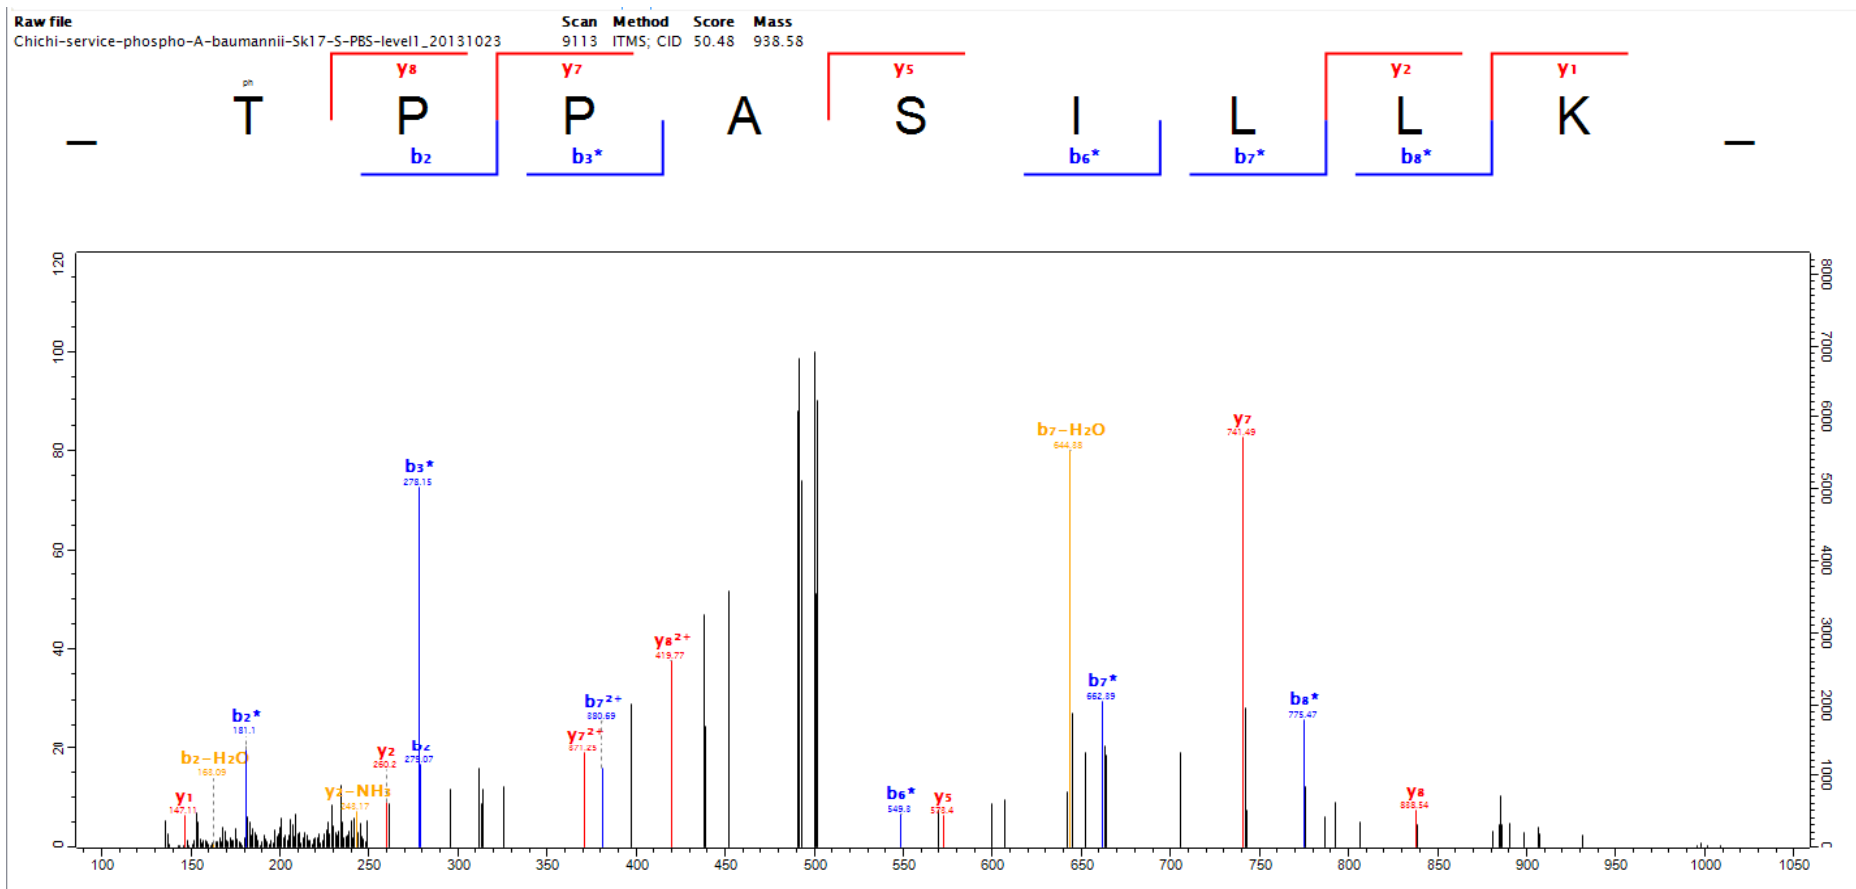

166-2

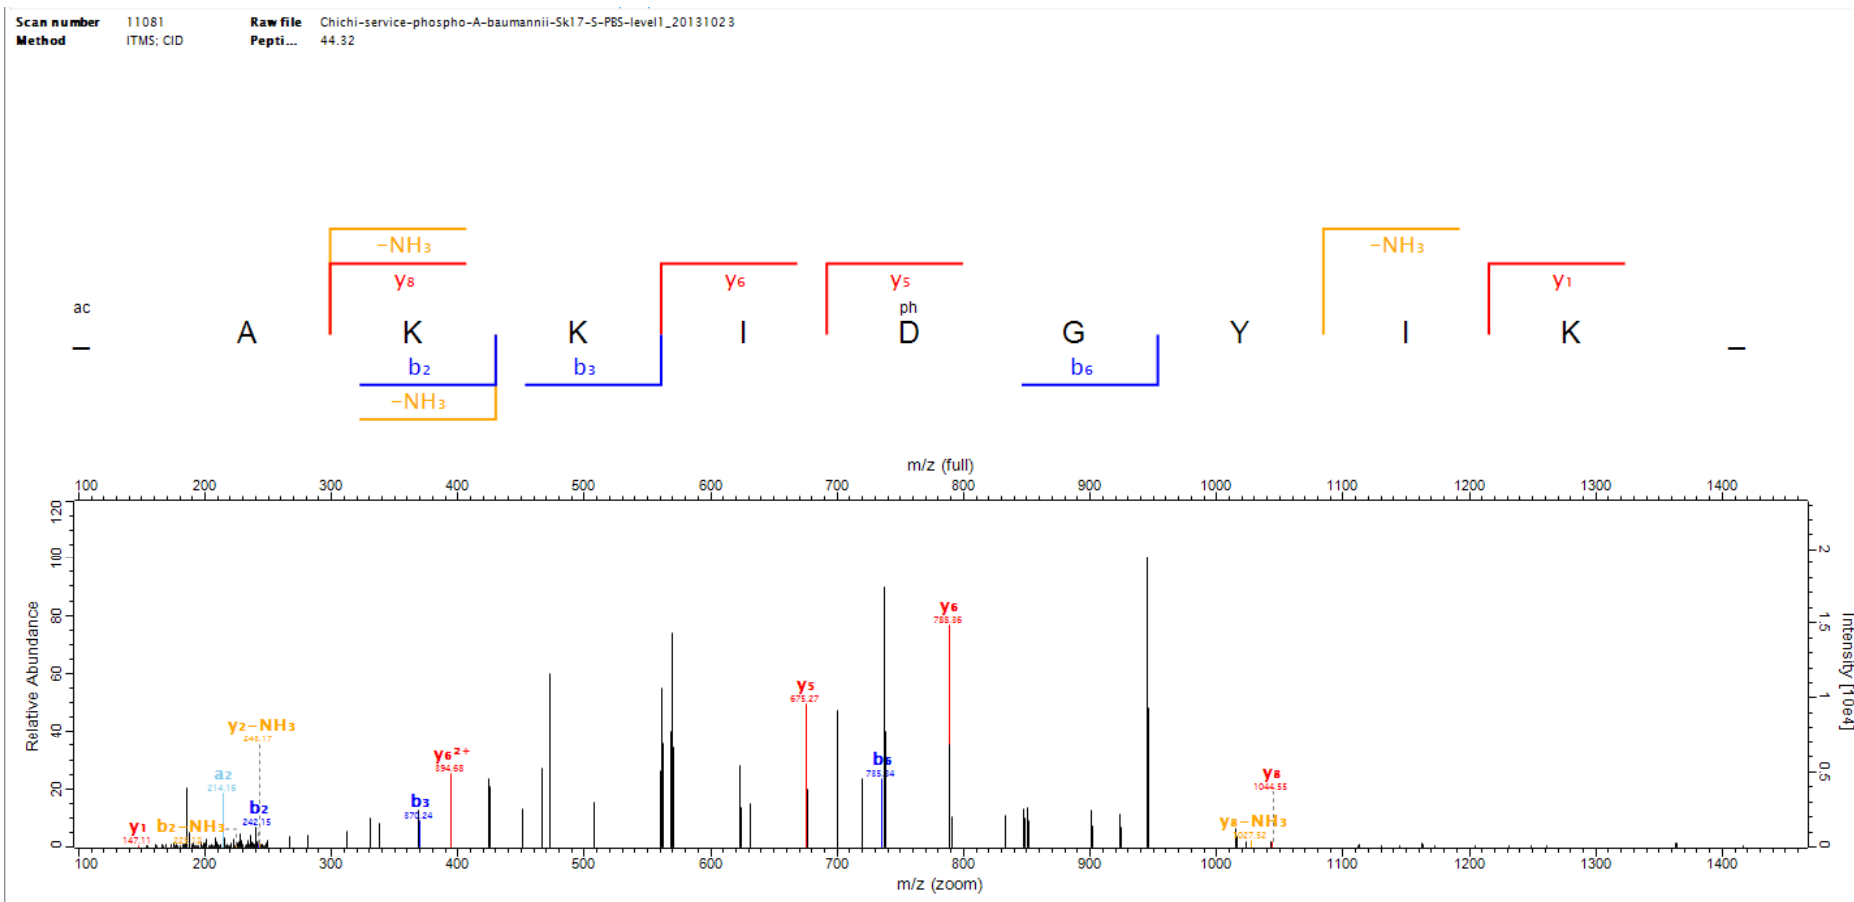



Scan number 5218 Raw file Chichi-service-phospho-A-baumanni-Skl7-5-PBS-level2\_20131007  
Method ITMS: CID Pepti... 51.64

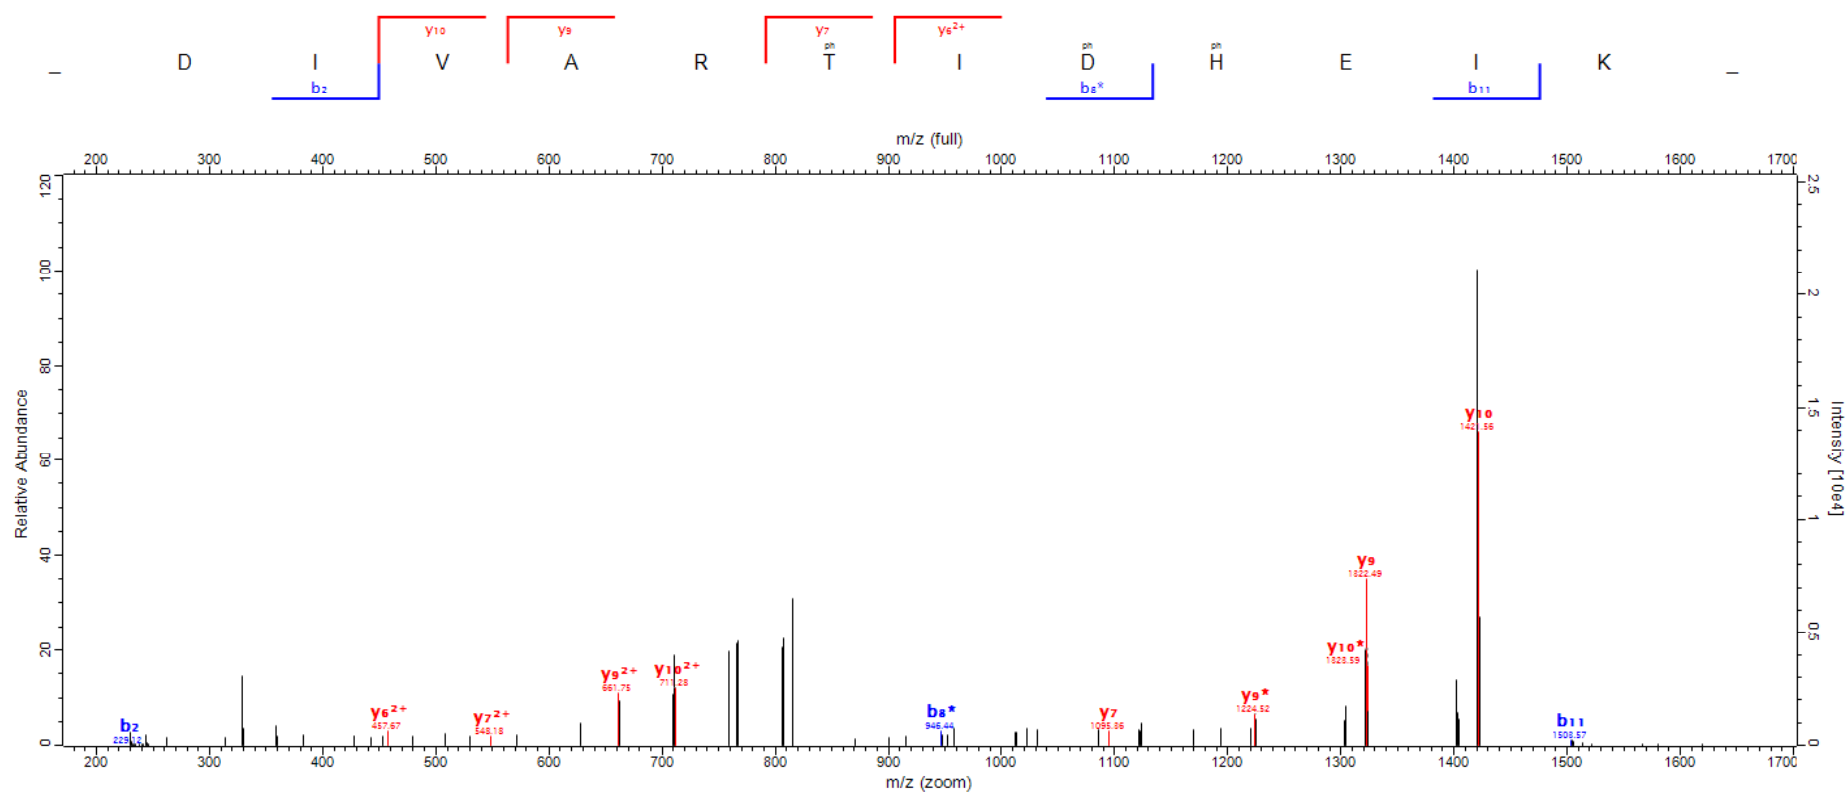

168-1

Raw file

Chichi-service-phospho-A-baumannii-Sk17-S-EtOH-level1\_20131023

| Scan | Method    | Score | Mass    |
|------|-----------|-------|---------|
| 8589 | ITMS; CID | 33.84 | 1366.64 |

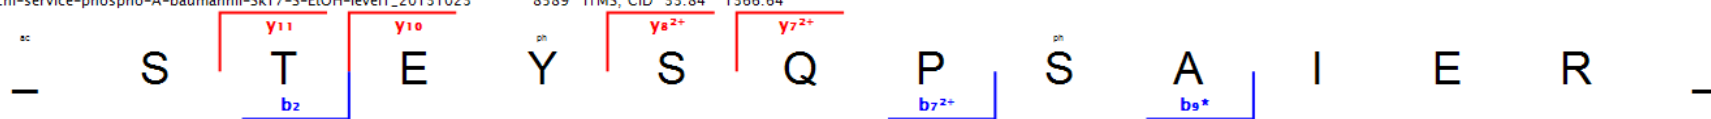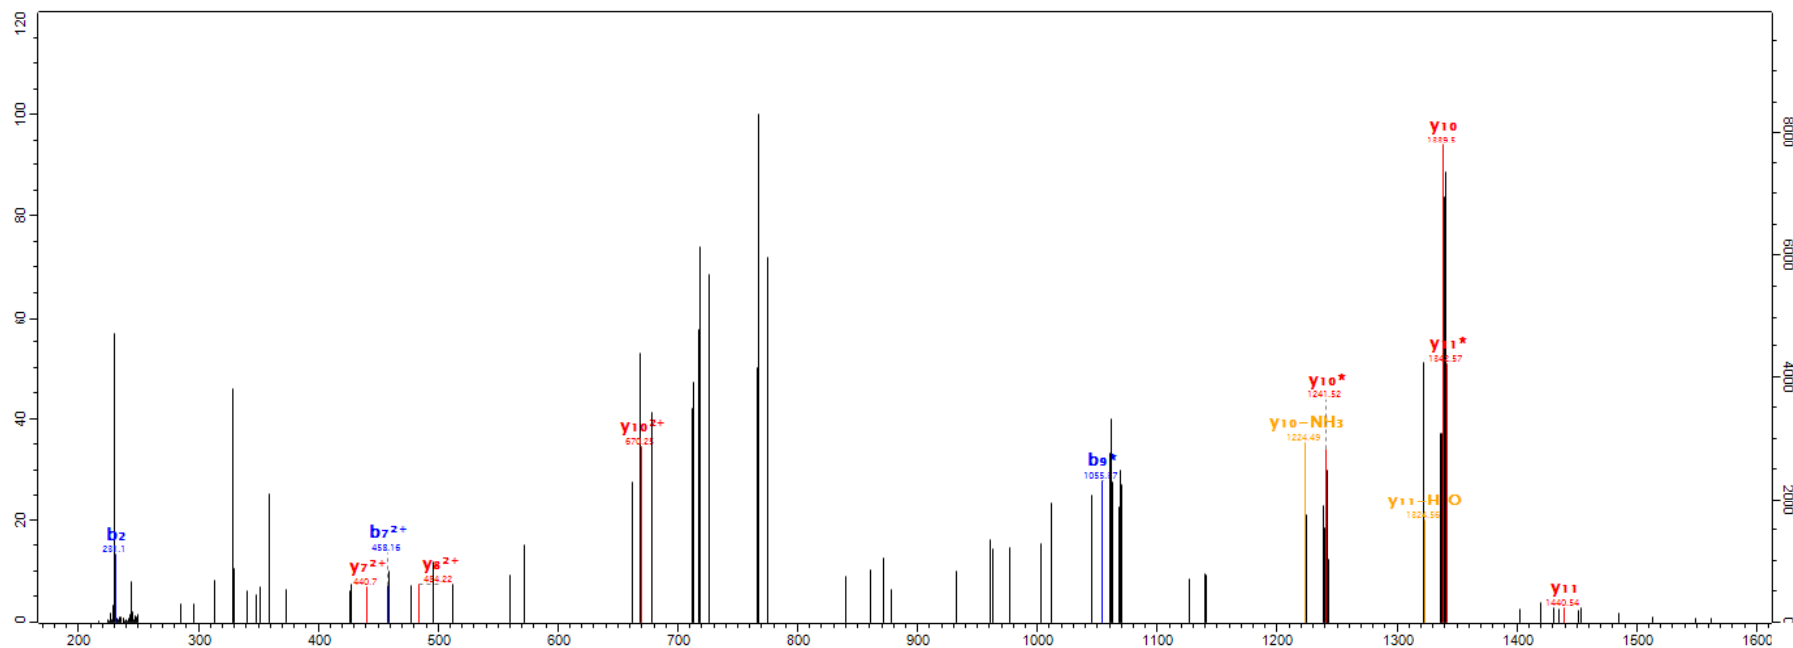

168-2

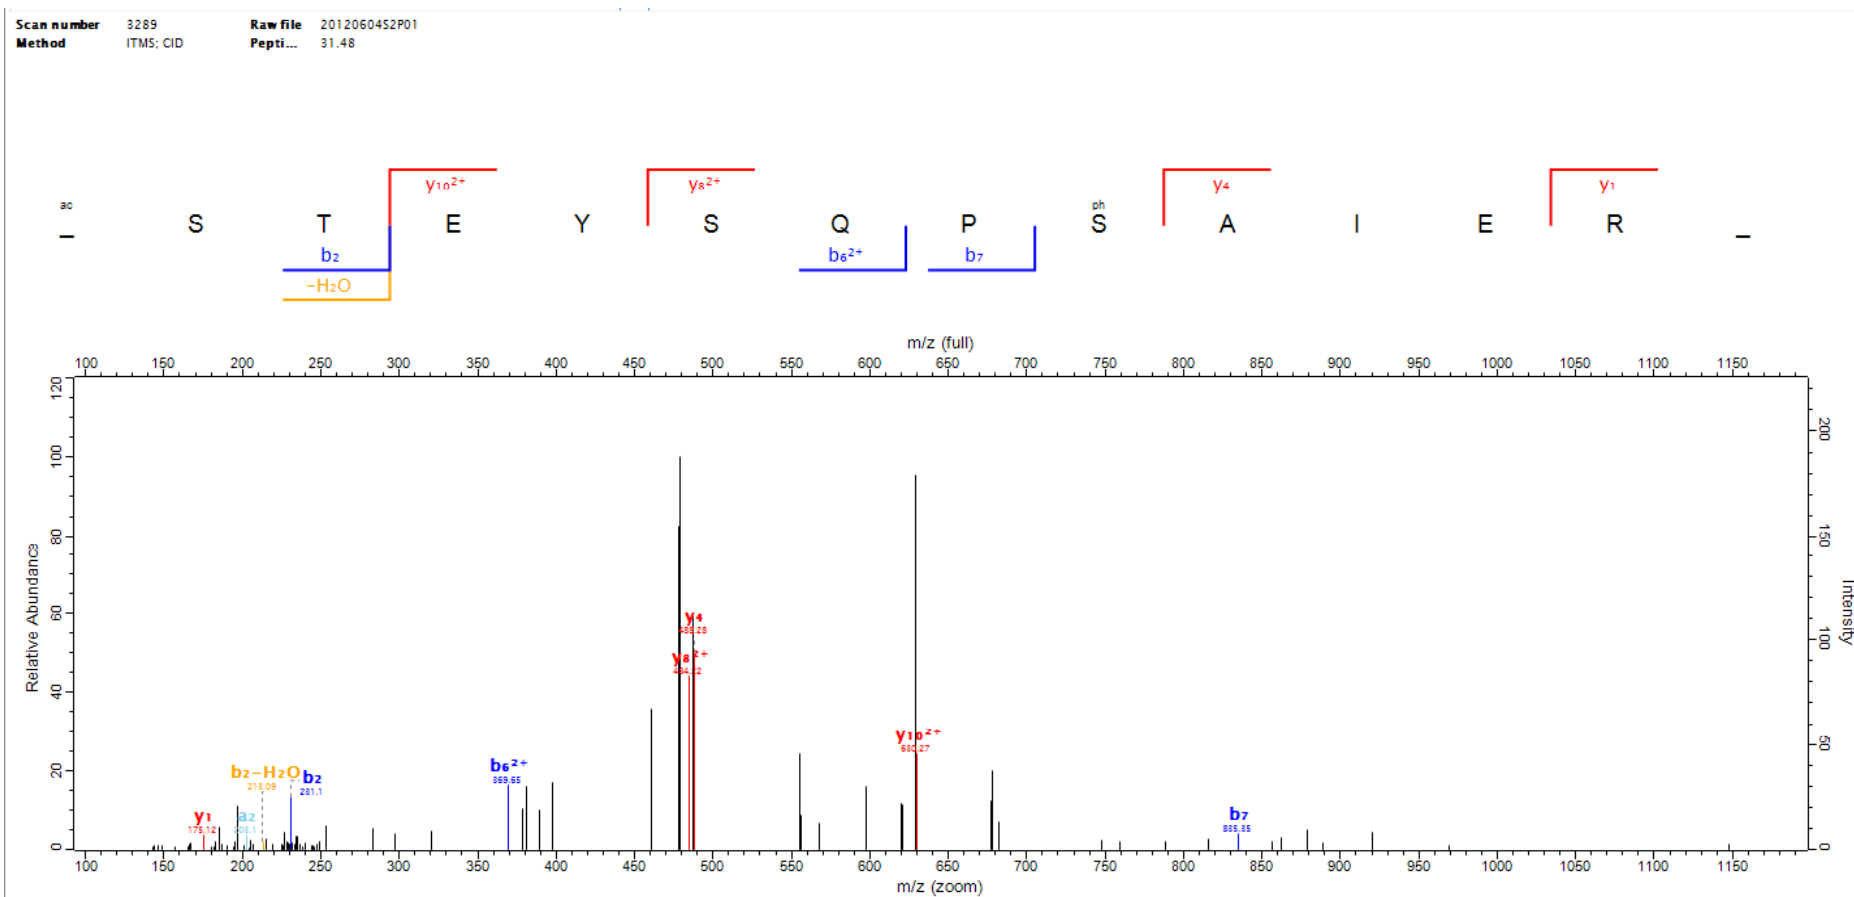

169-1

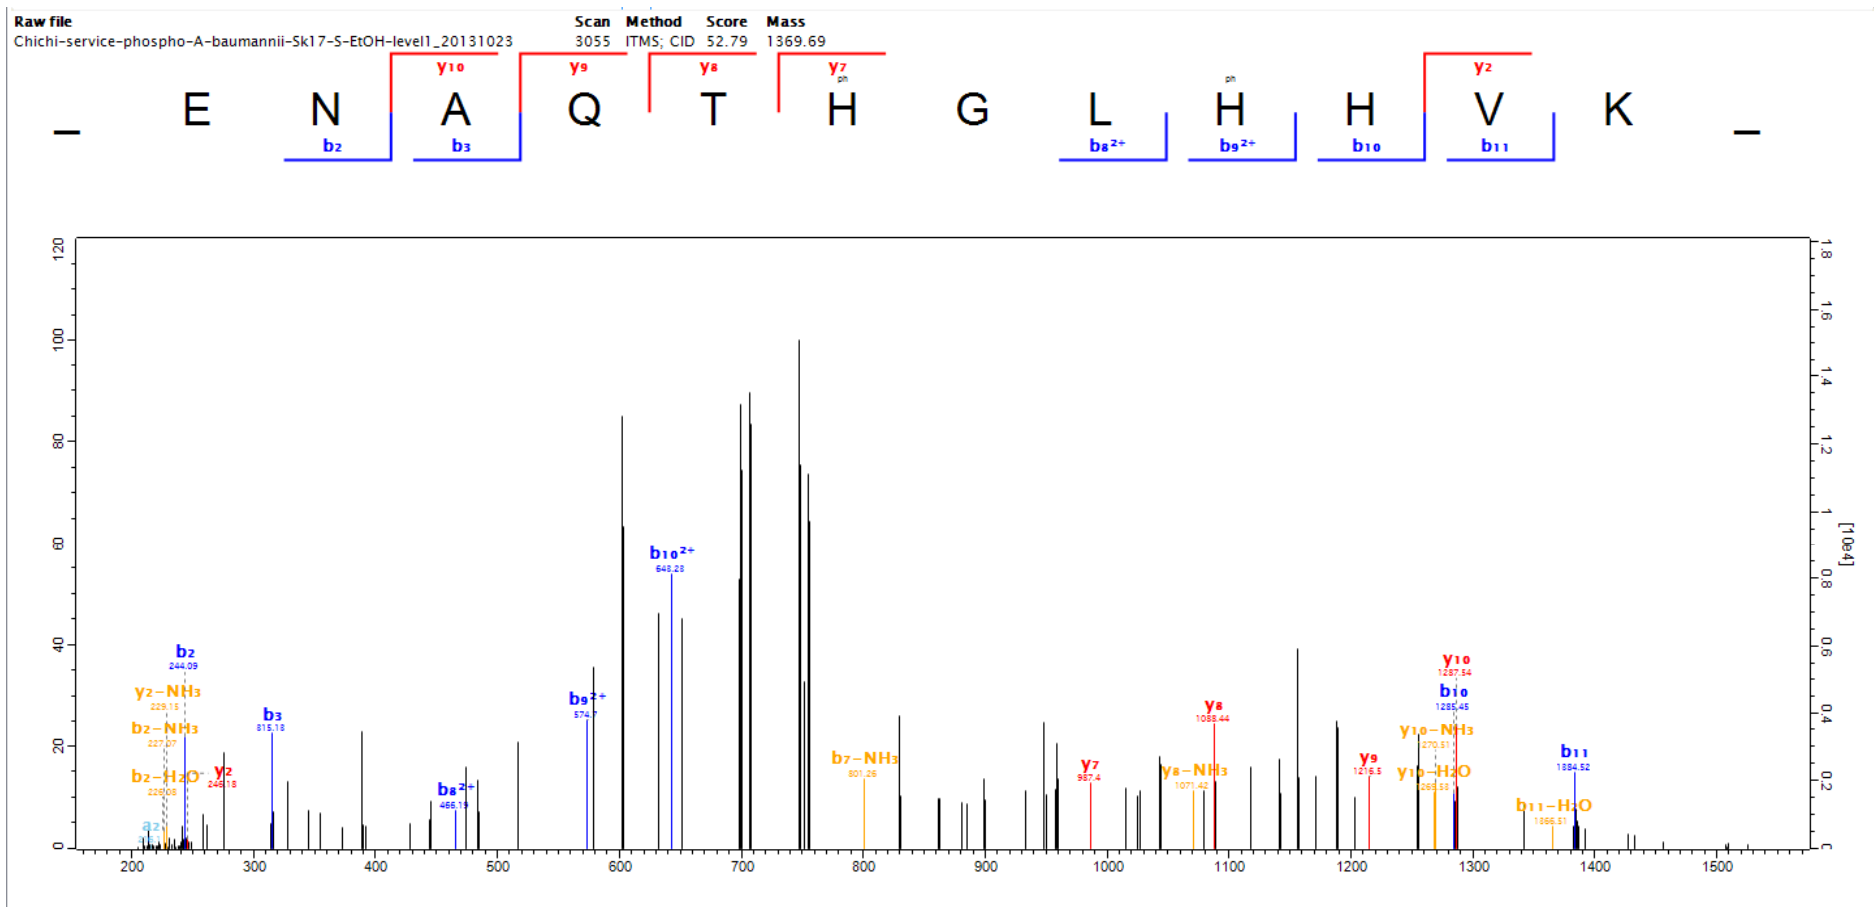

169-2

Scan number 3043 Raw file Chichi-service-phospho-A-baumannii-Sk17-S-EtOH-level1\_20131023  
 Method ITMS: CID Pepti... 53.49

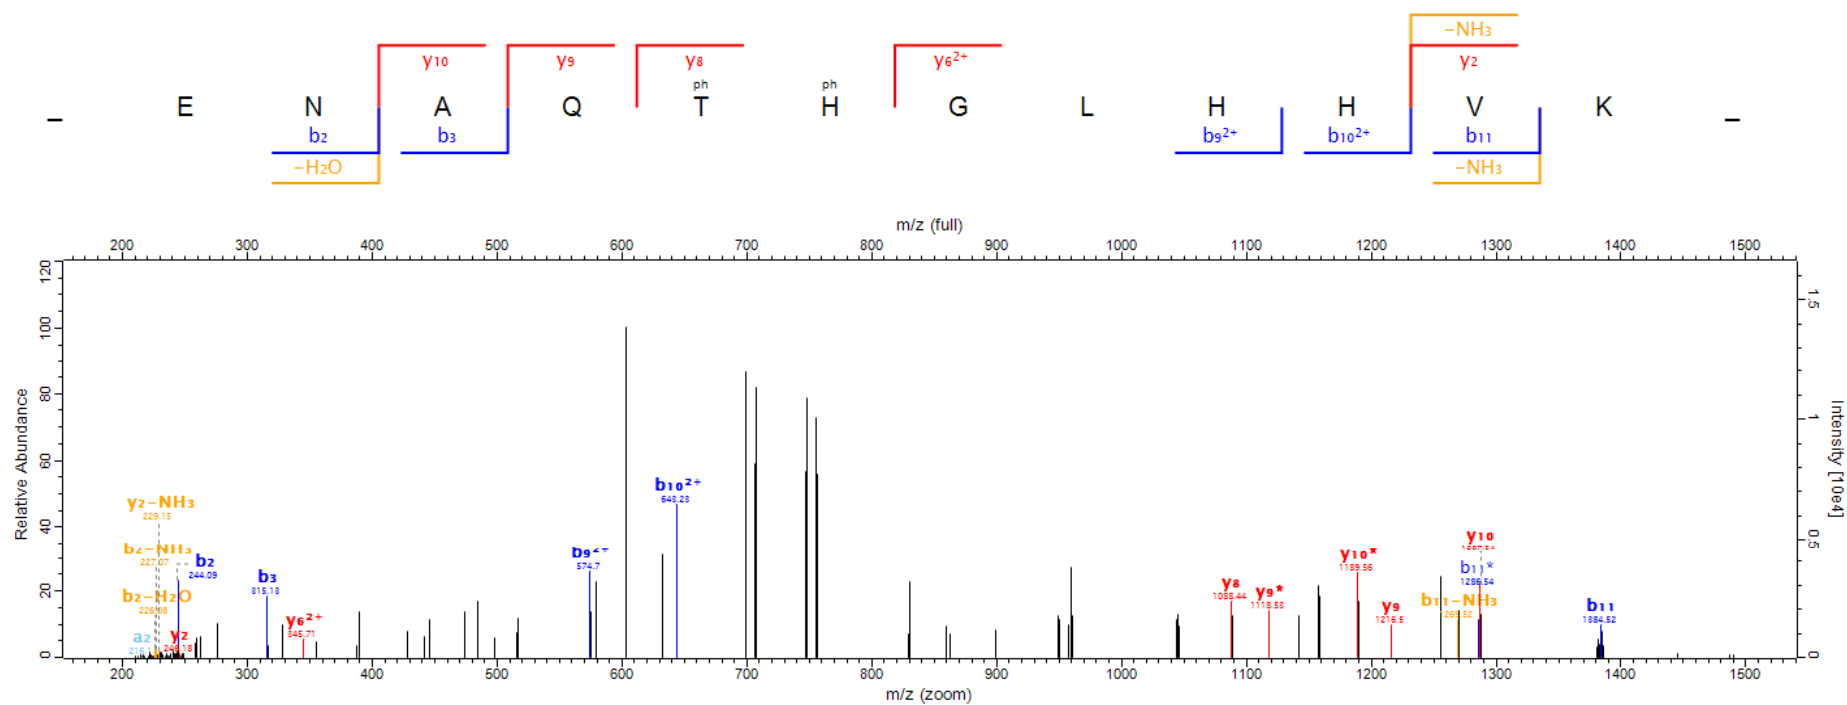

170-1

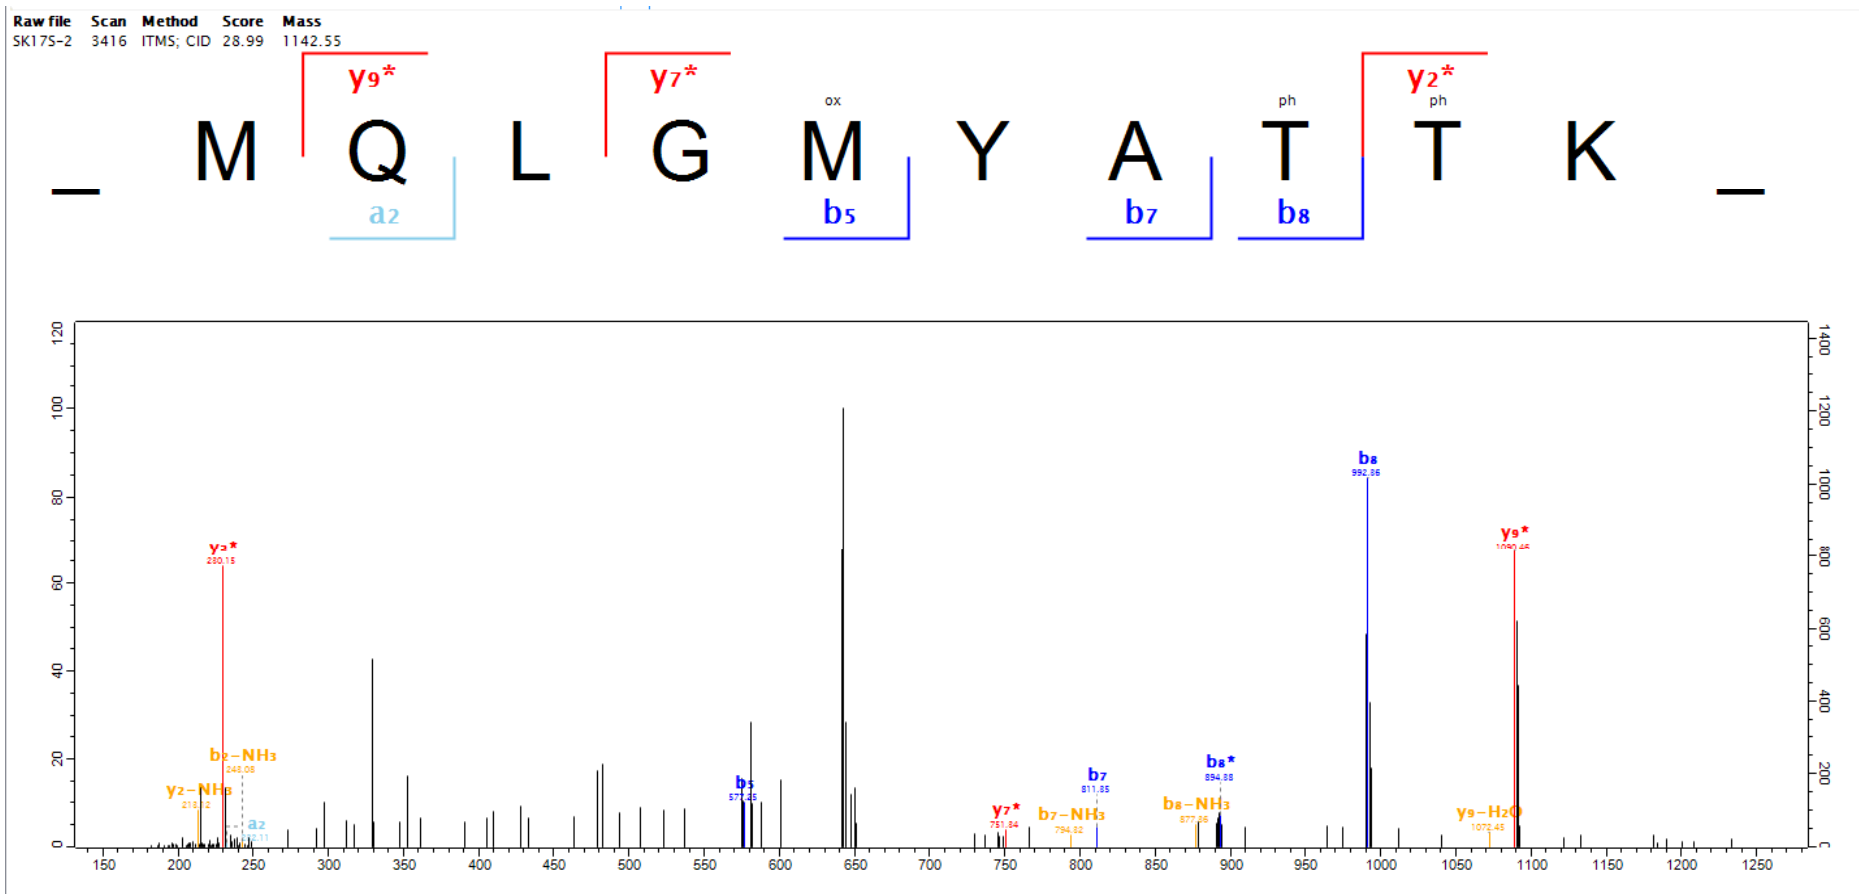

170-2

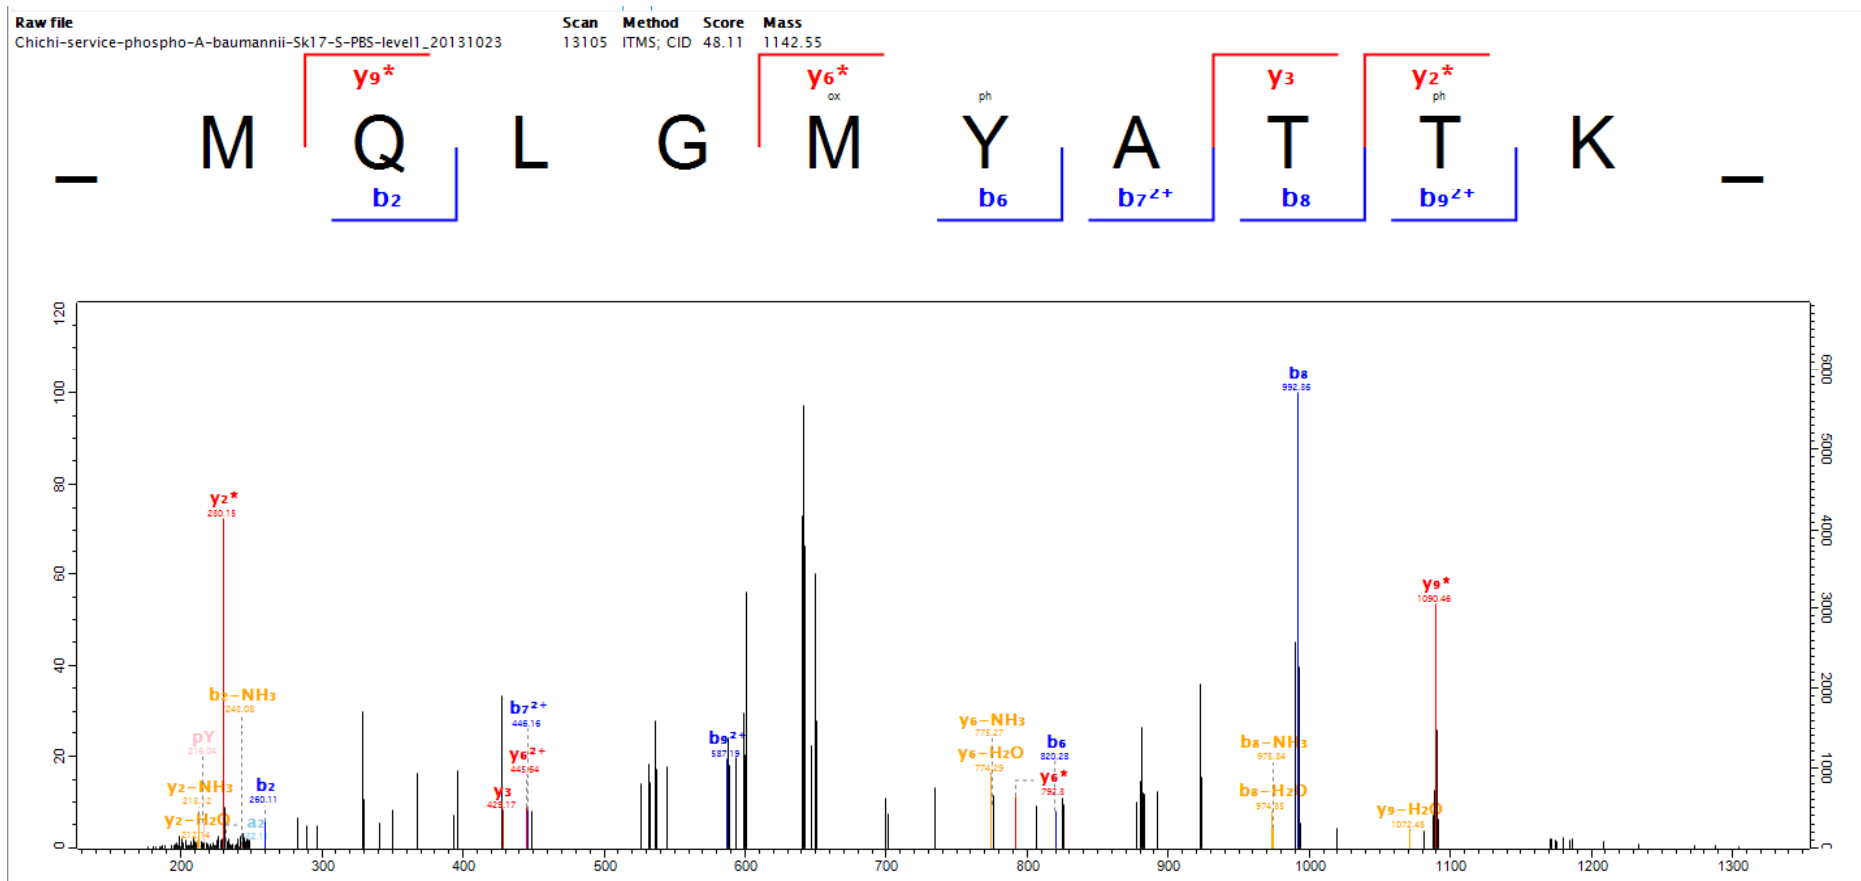

Raw file  
Chichi-service-phospho-A-baumannii-Sk17-S-PBS-level2\_20131007

| Scan | Method    | Score | Mass   |
|------|-----------|-------|--------|
| 5855 | ITMS; CID | 45.36 | 1626.7 |

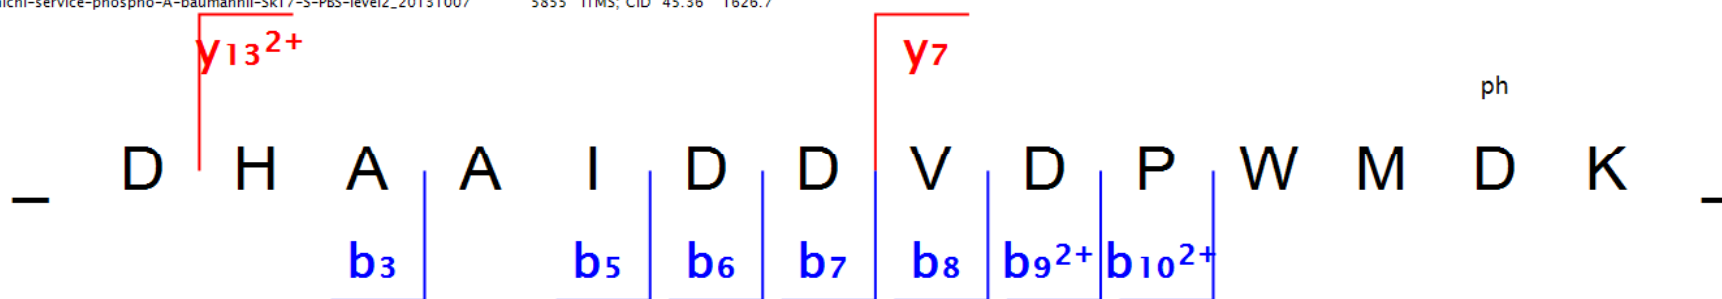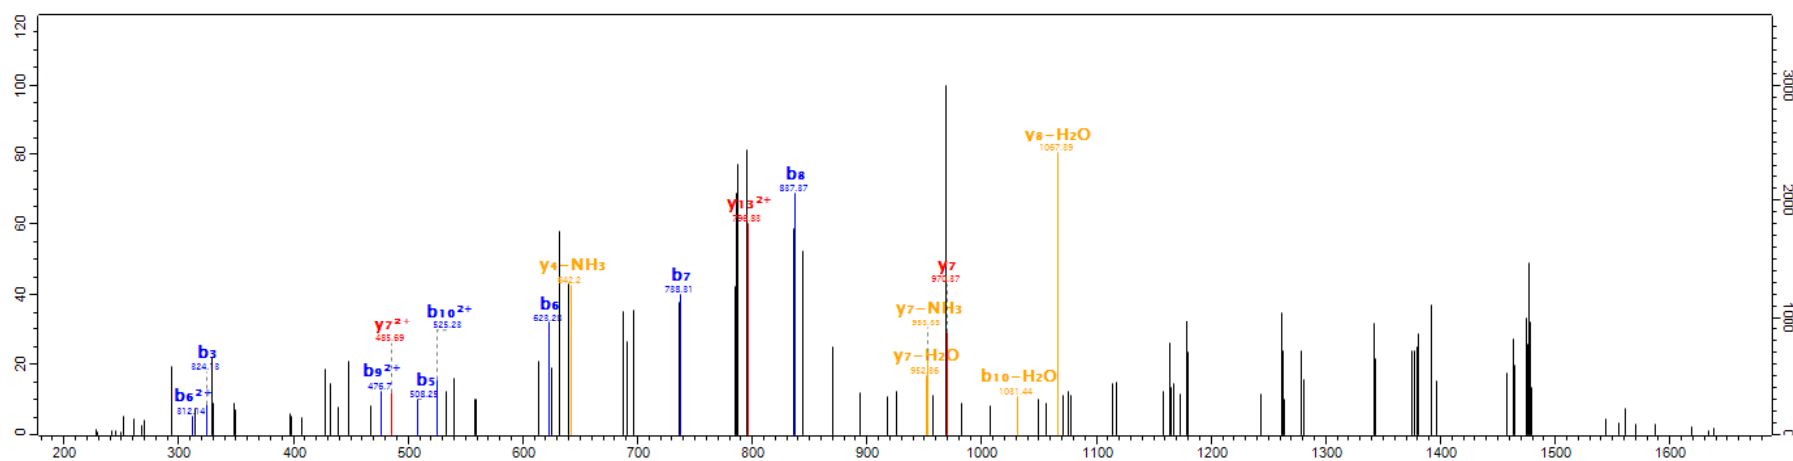



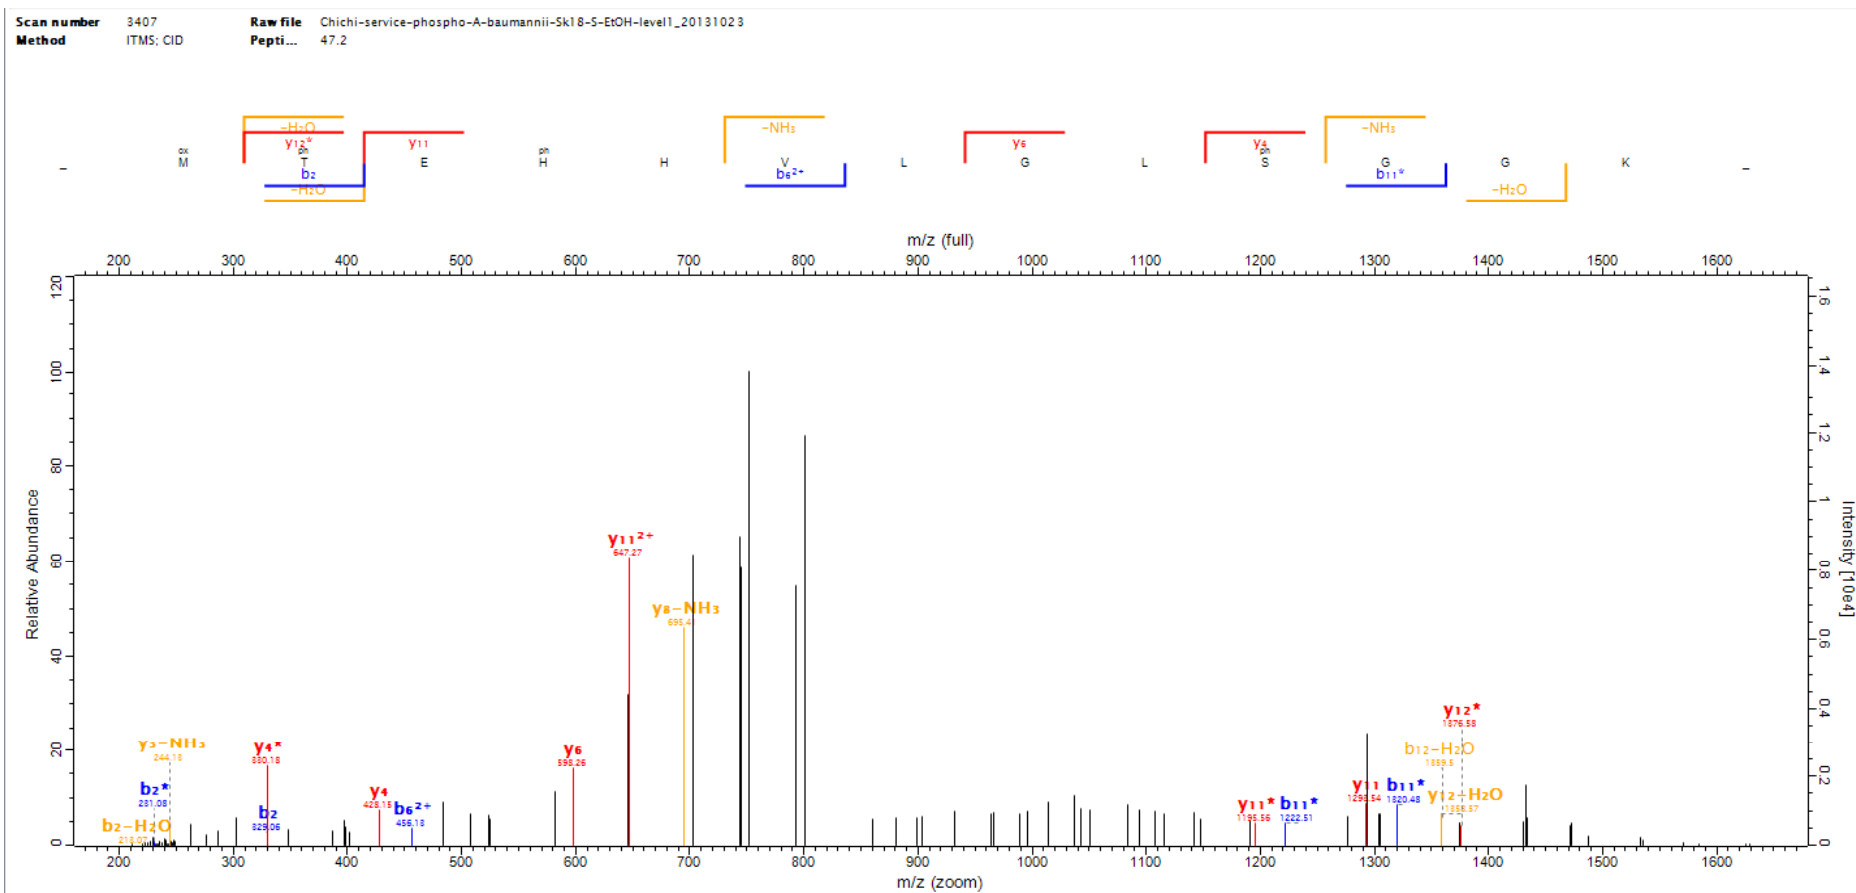

Scan number 14825 Raw file Chichi-service-phospho-A-baumannii-Sk17-5-EtOH-level1\_20131023  
 Method ITMS; CID Pepti... 71.43

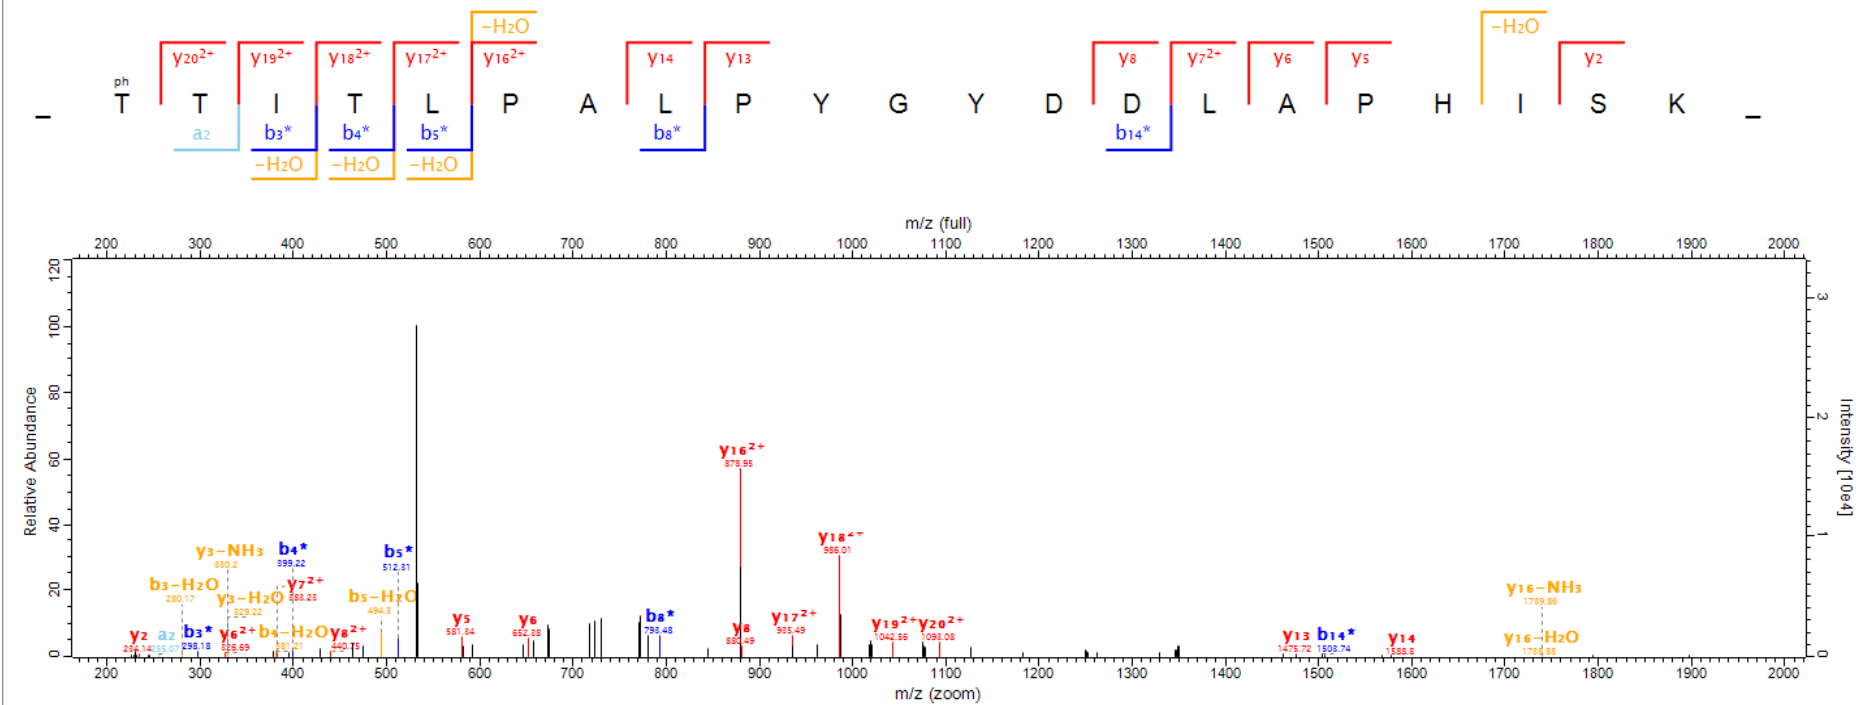

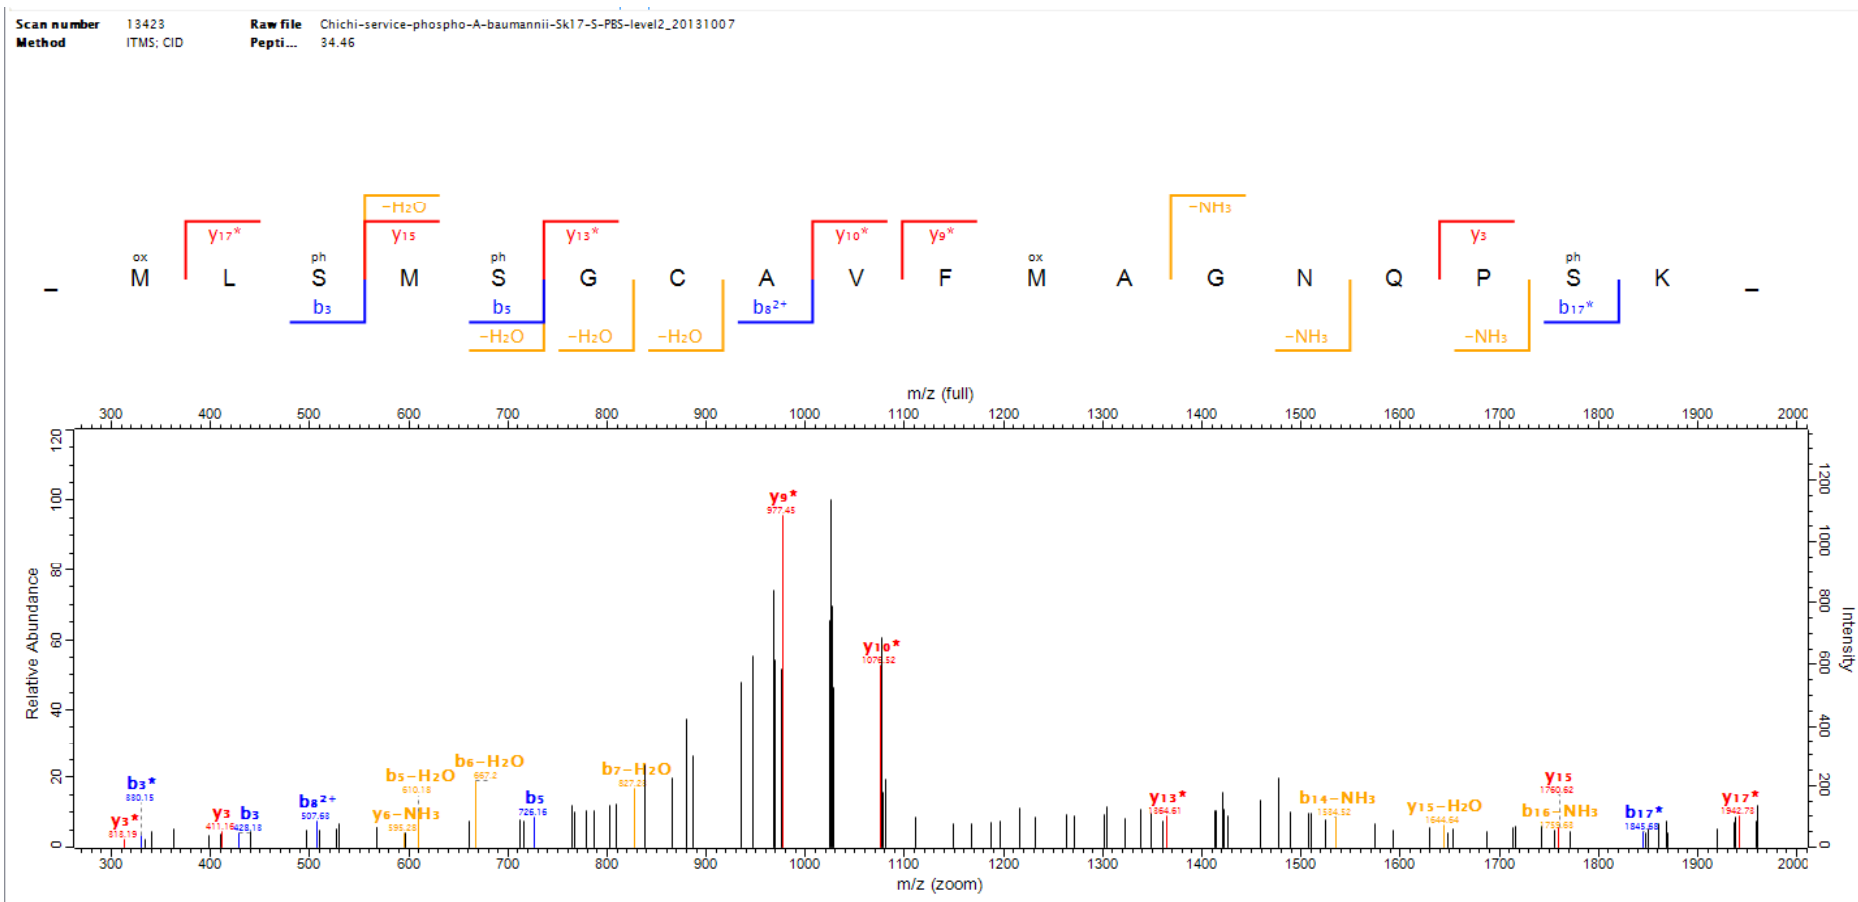

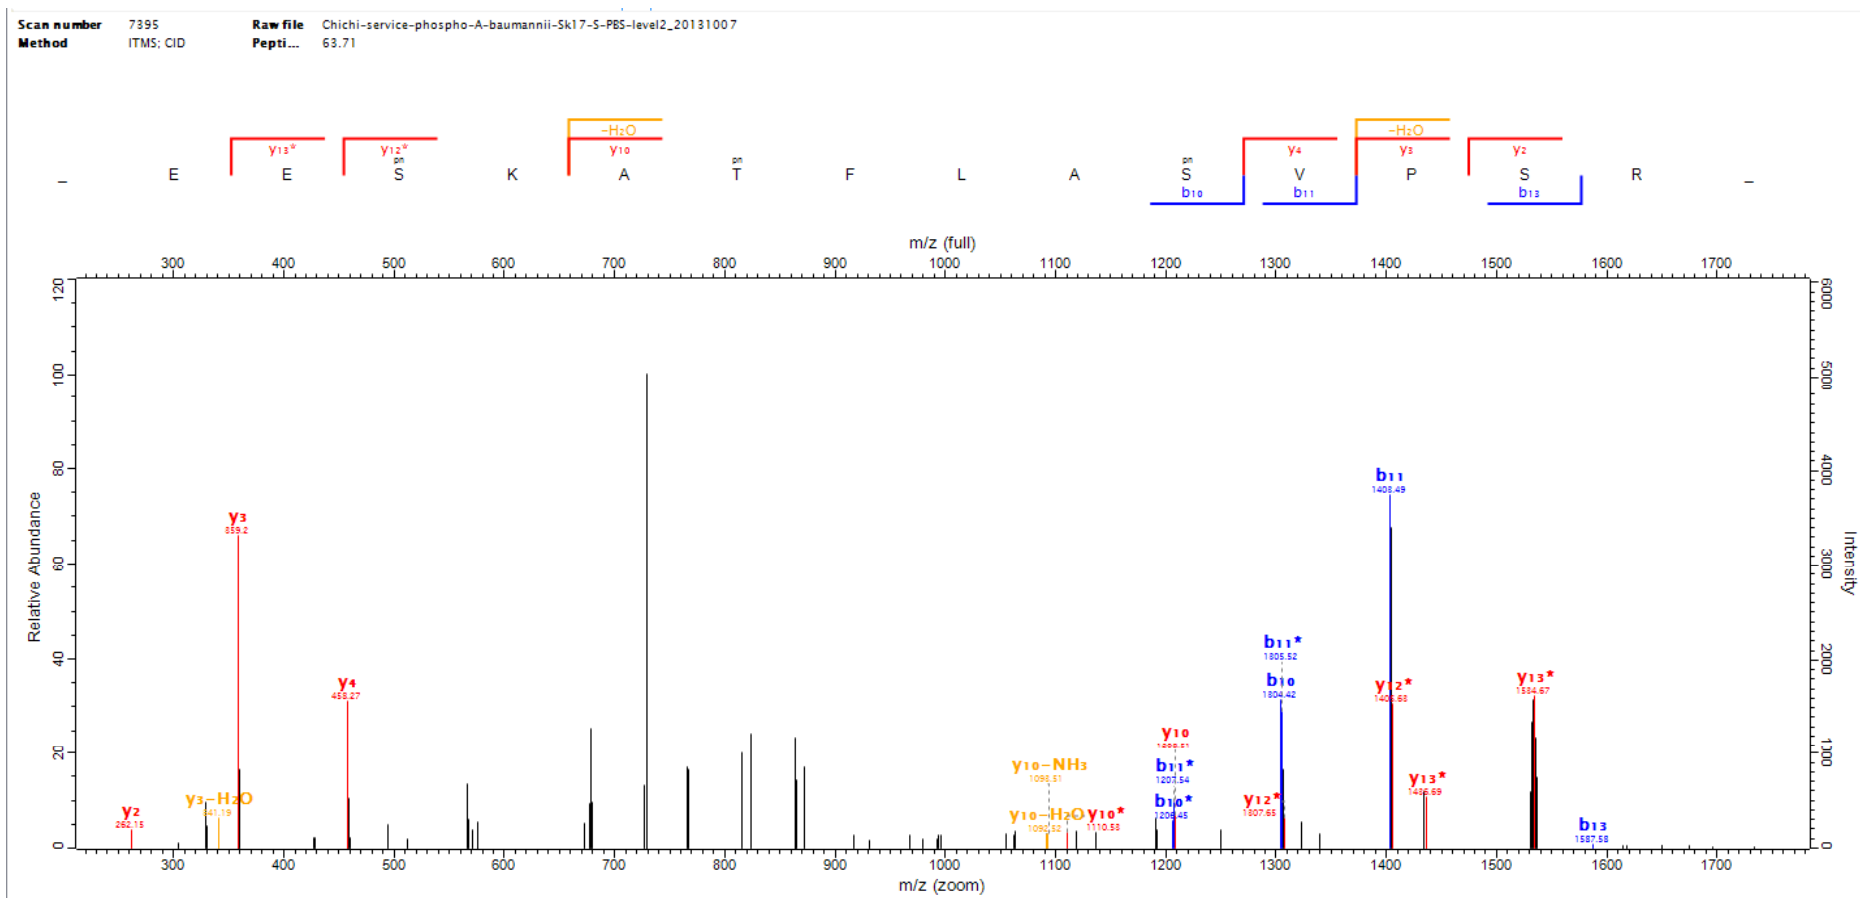

Scan number 9571 Raw file Chichi-service-phospho-A-baumannii-Sk17-S-EtOH-level1\_20131023  
 Method ITMS; CID Pepti... 45.61

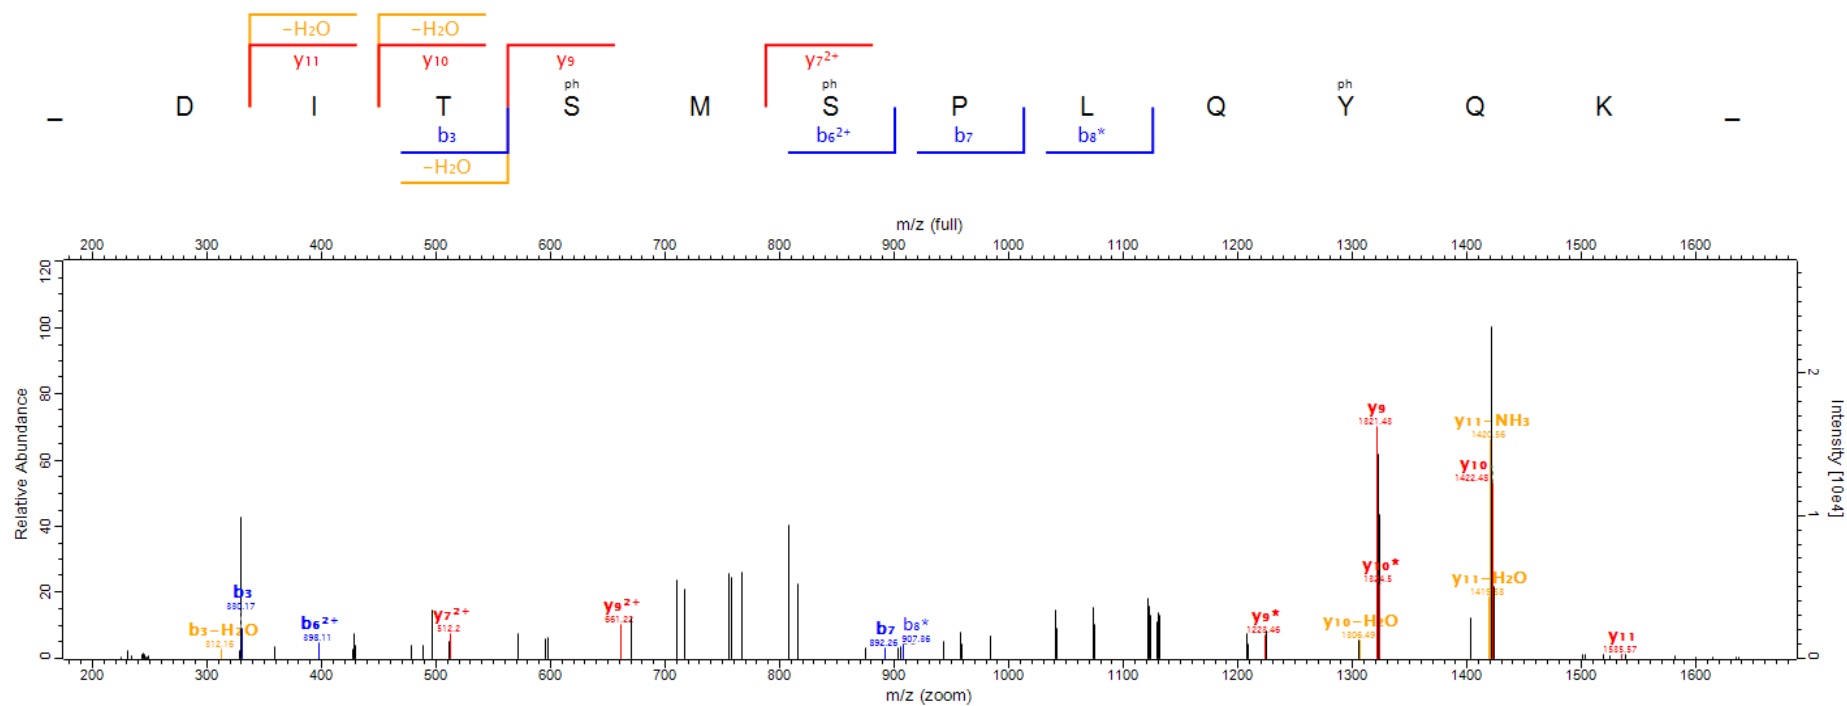

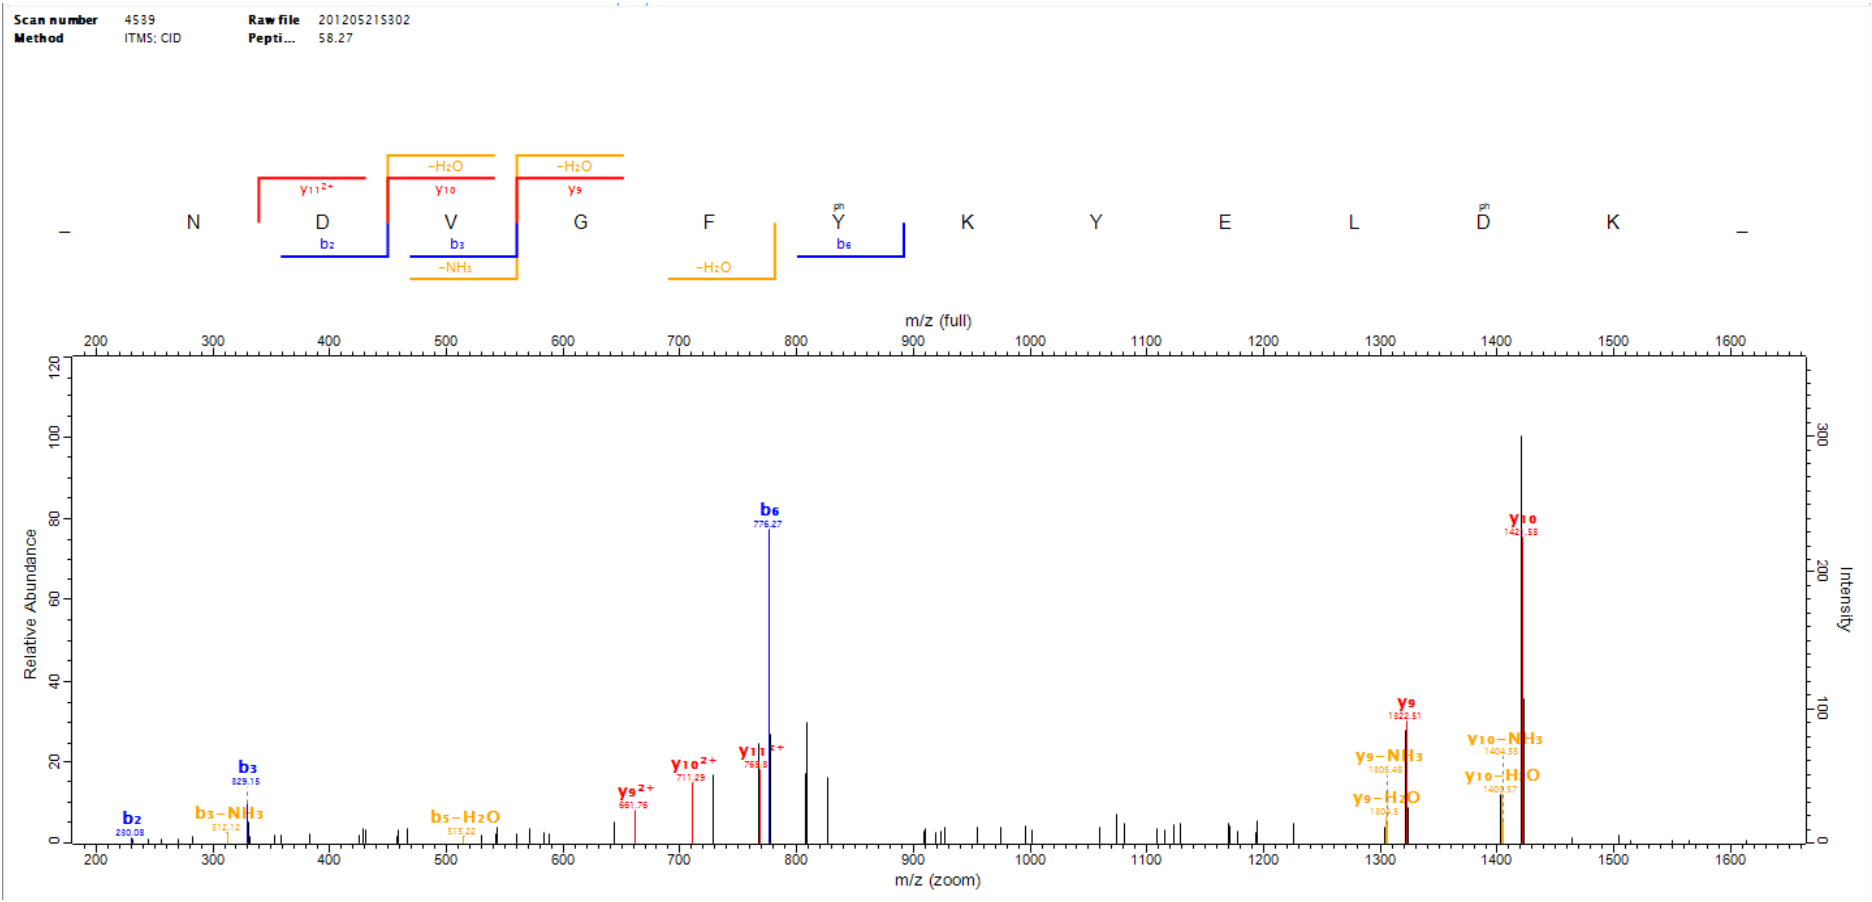

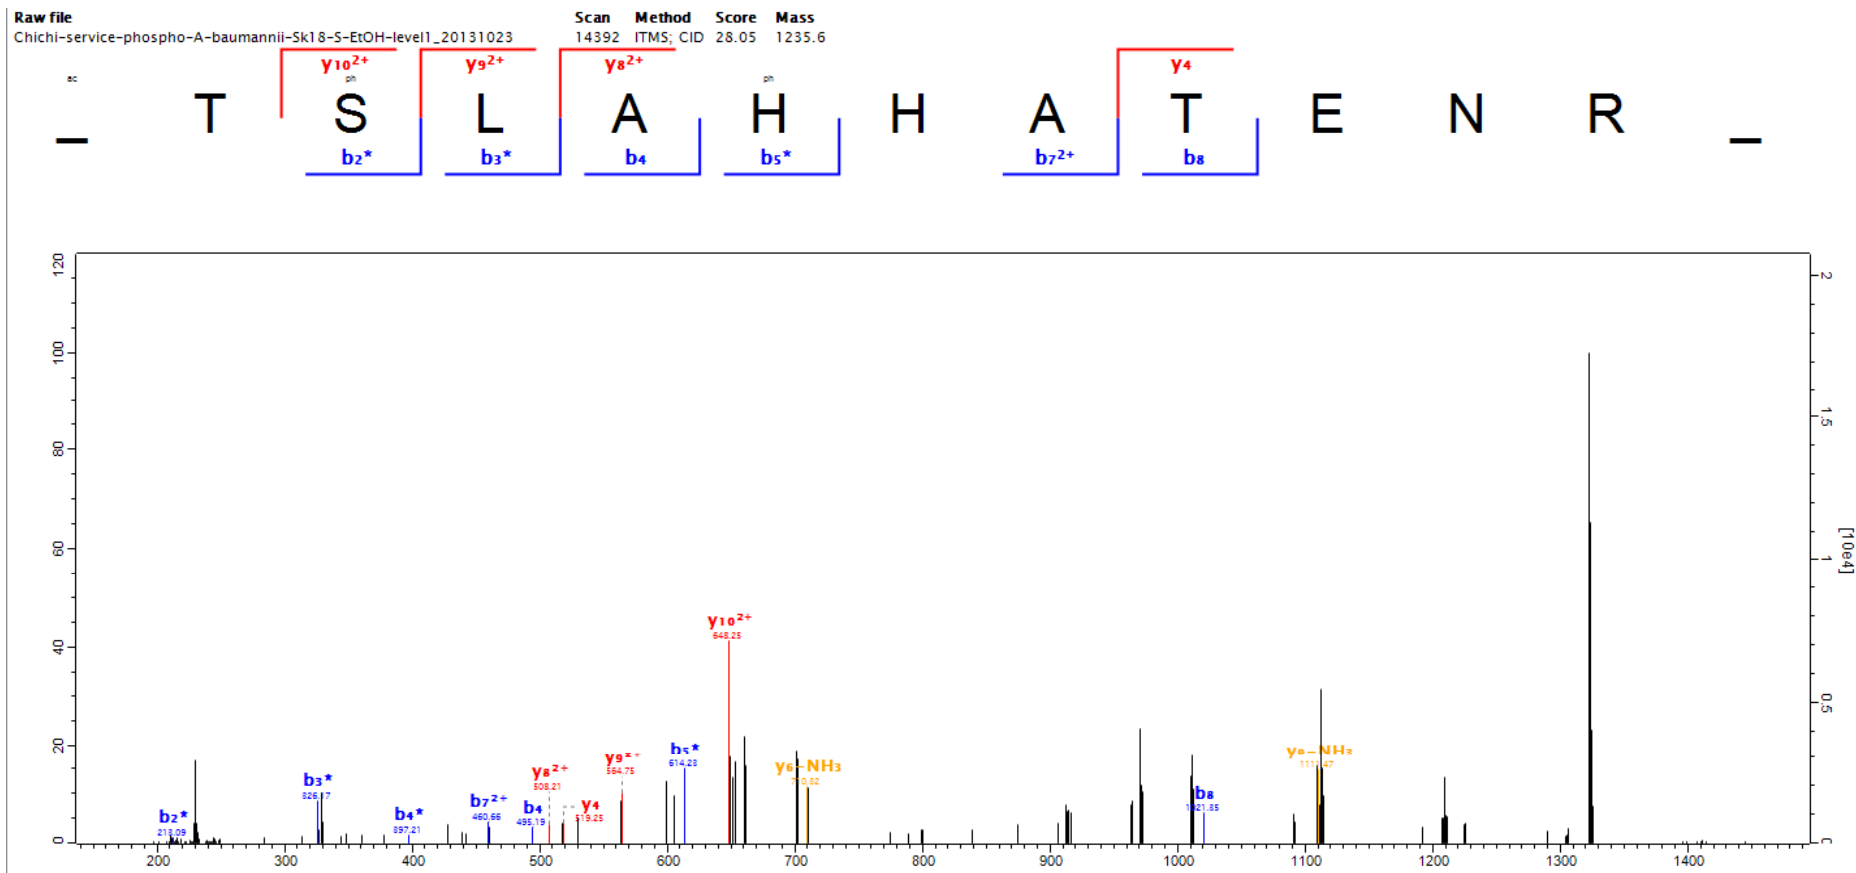

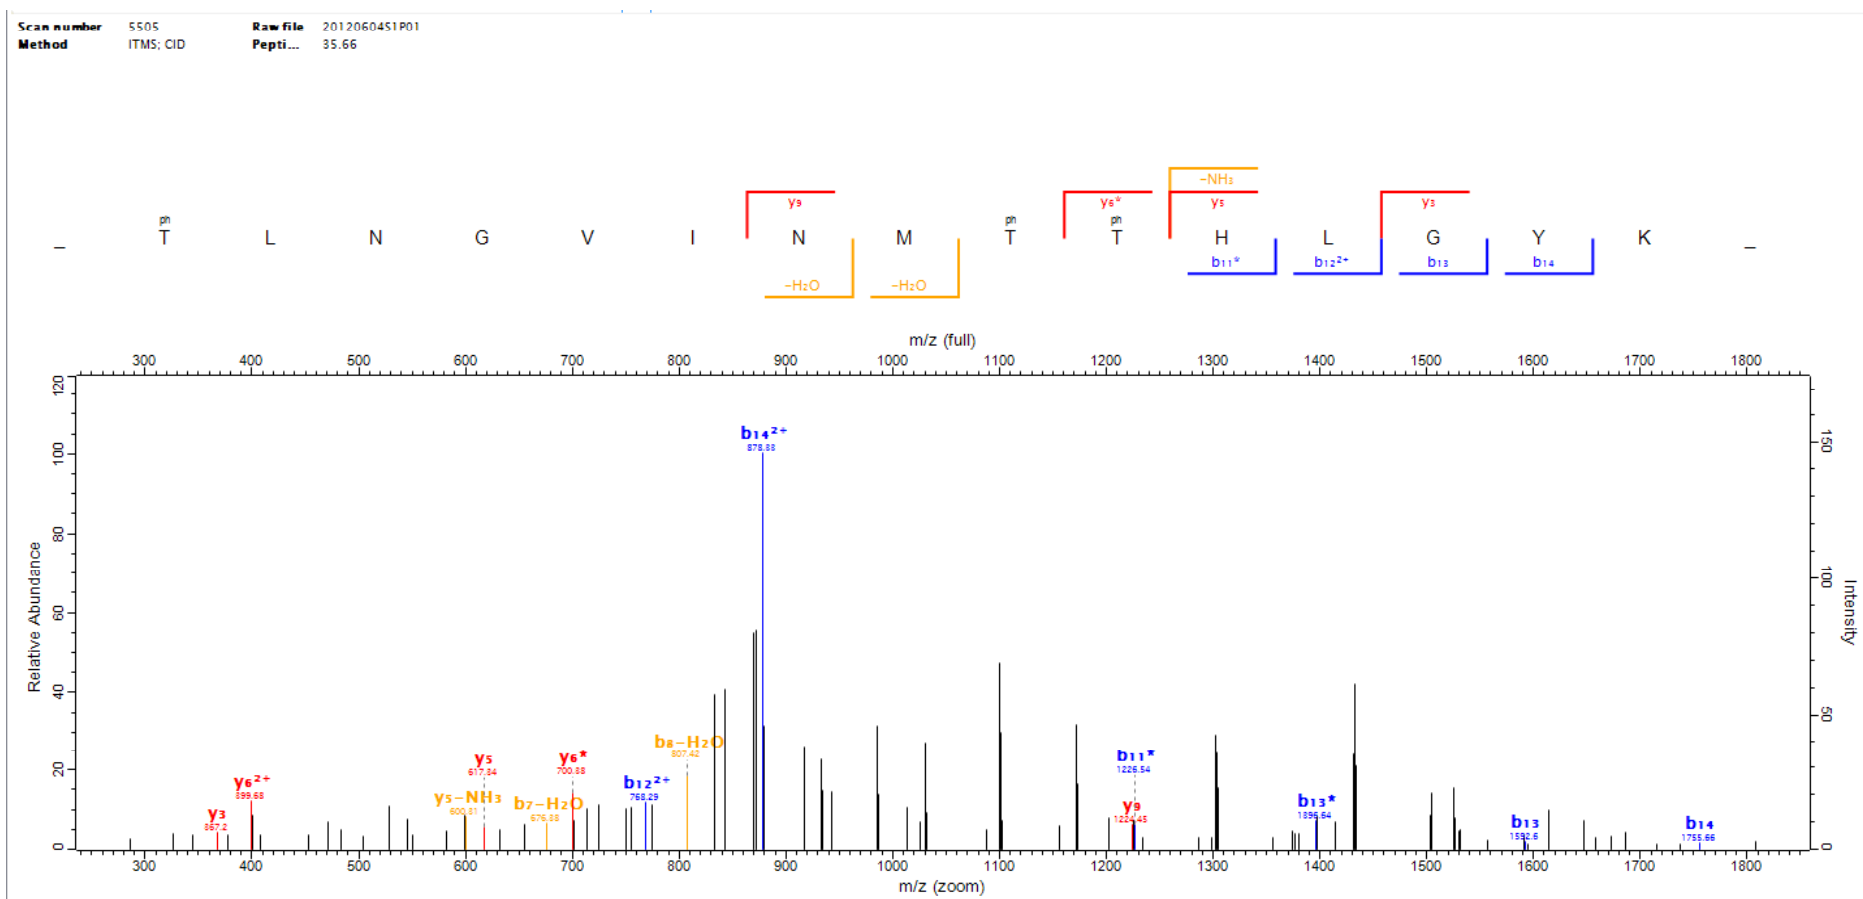



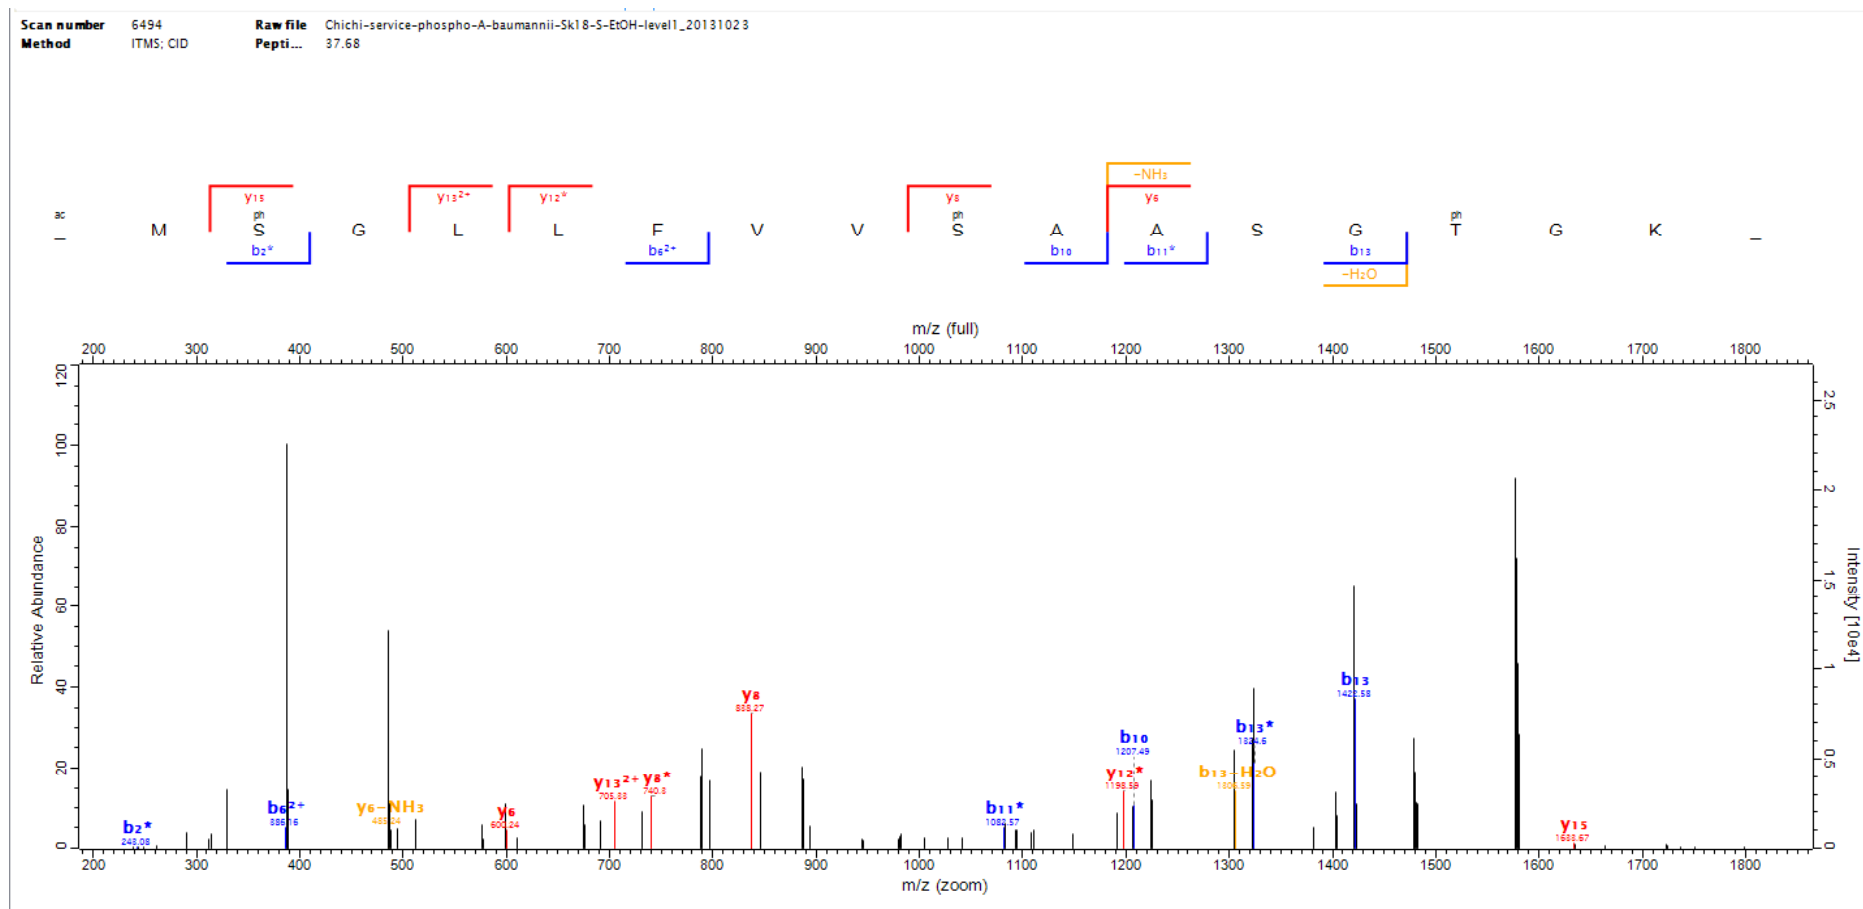

Scan number 3386 Raw file Chichi-service-phospho-A-baumannii-Sk18-5-EtOH-level1\_20131023  
 Method ITMS; CID Pepti... 61.66

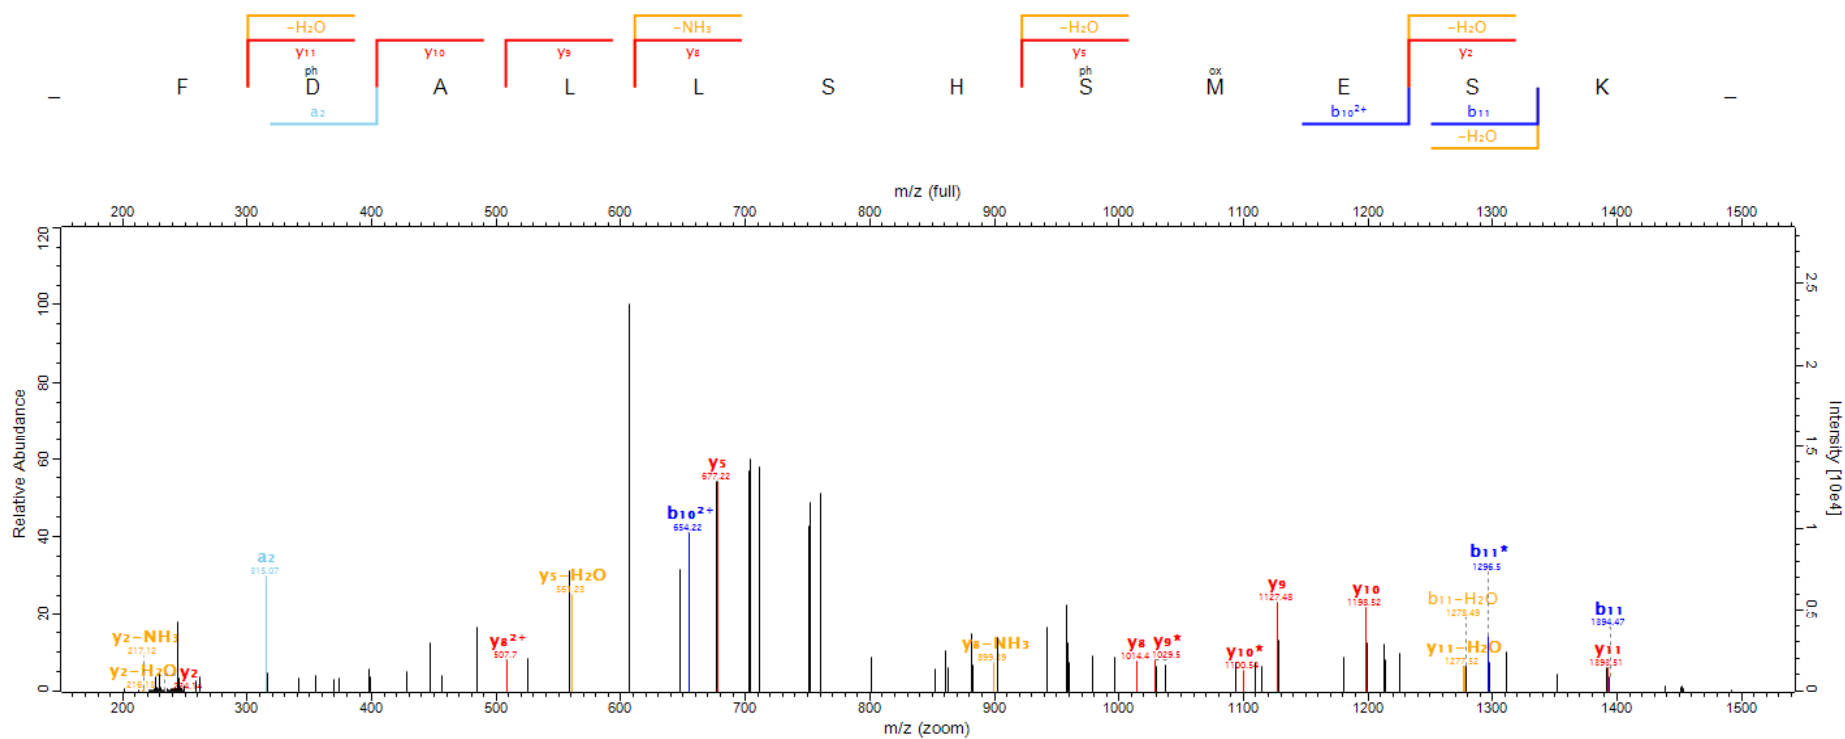

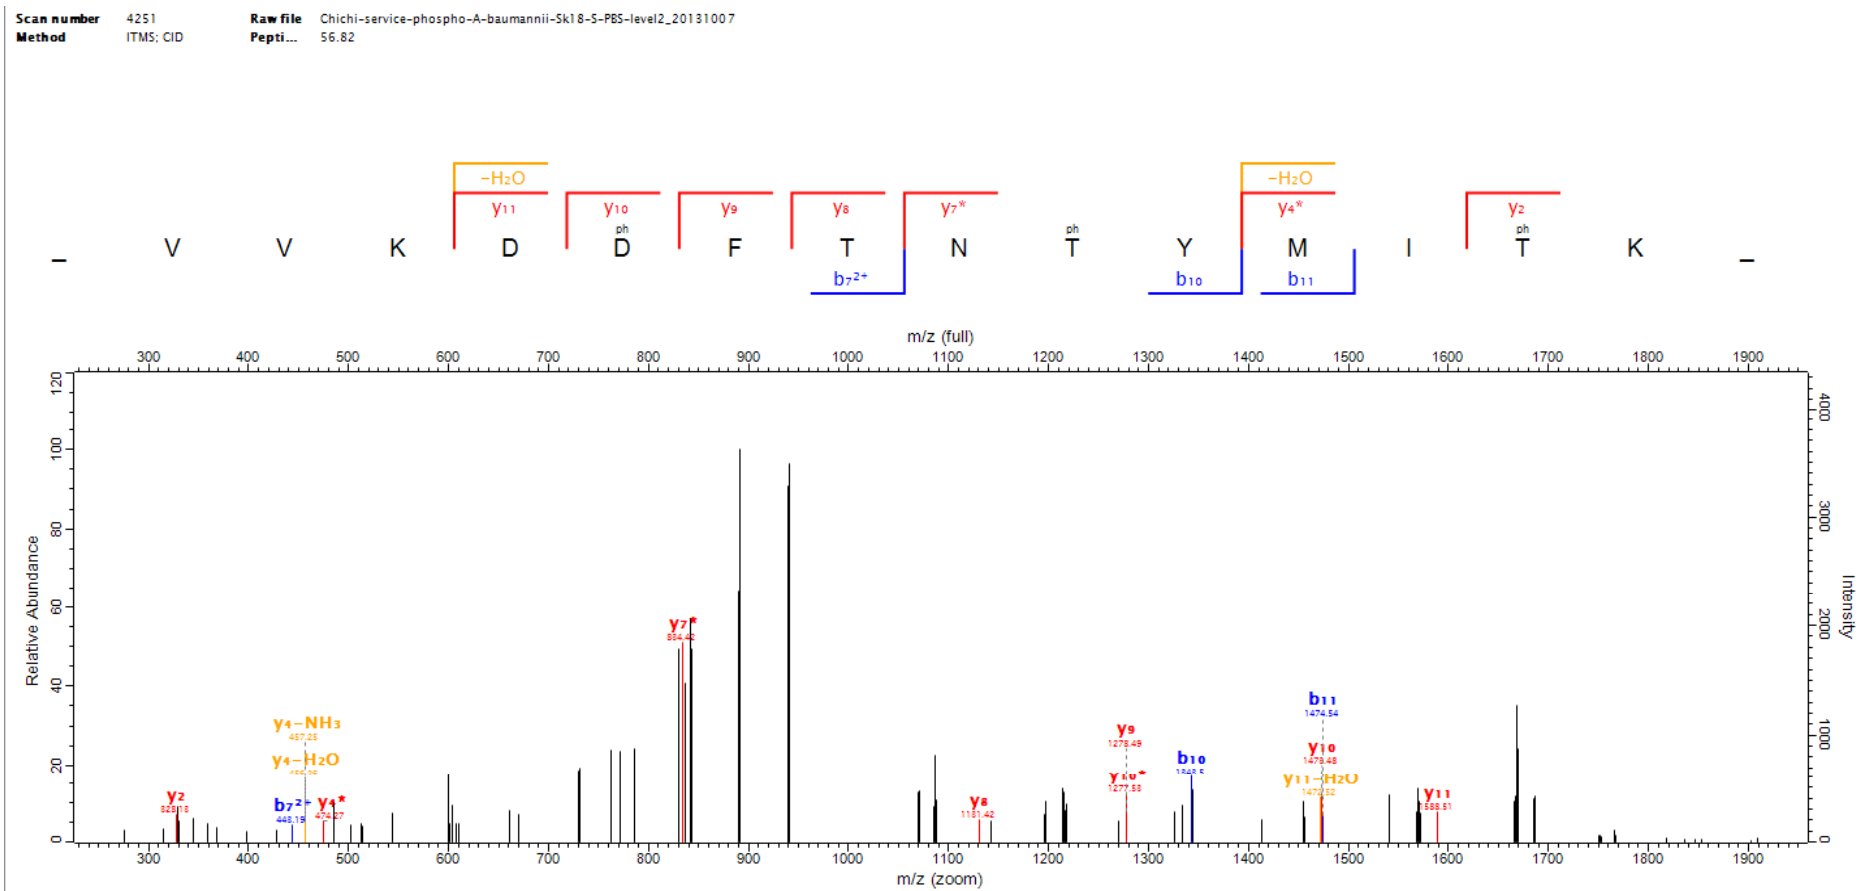

Scan number 9439 Raw file Chichi-service-phospho-A-baumannii-Sk18-S-EtOH-level2\_20131007  
Method ITMS; CID Pepti... 51.44

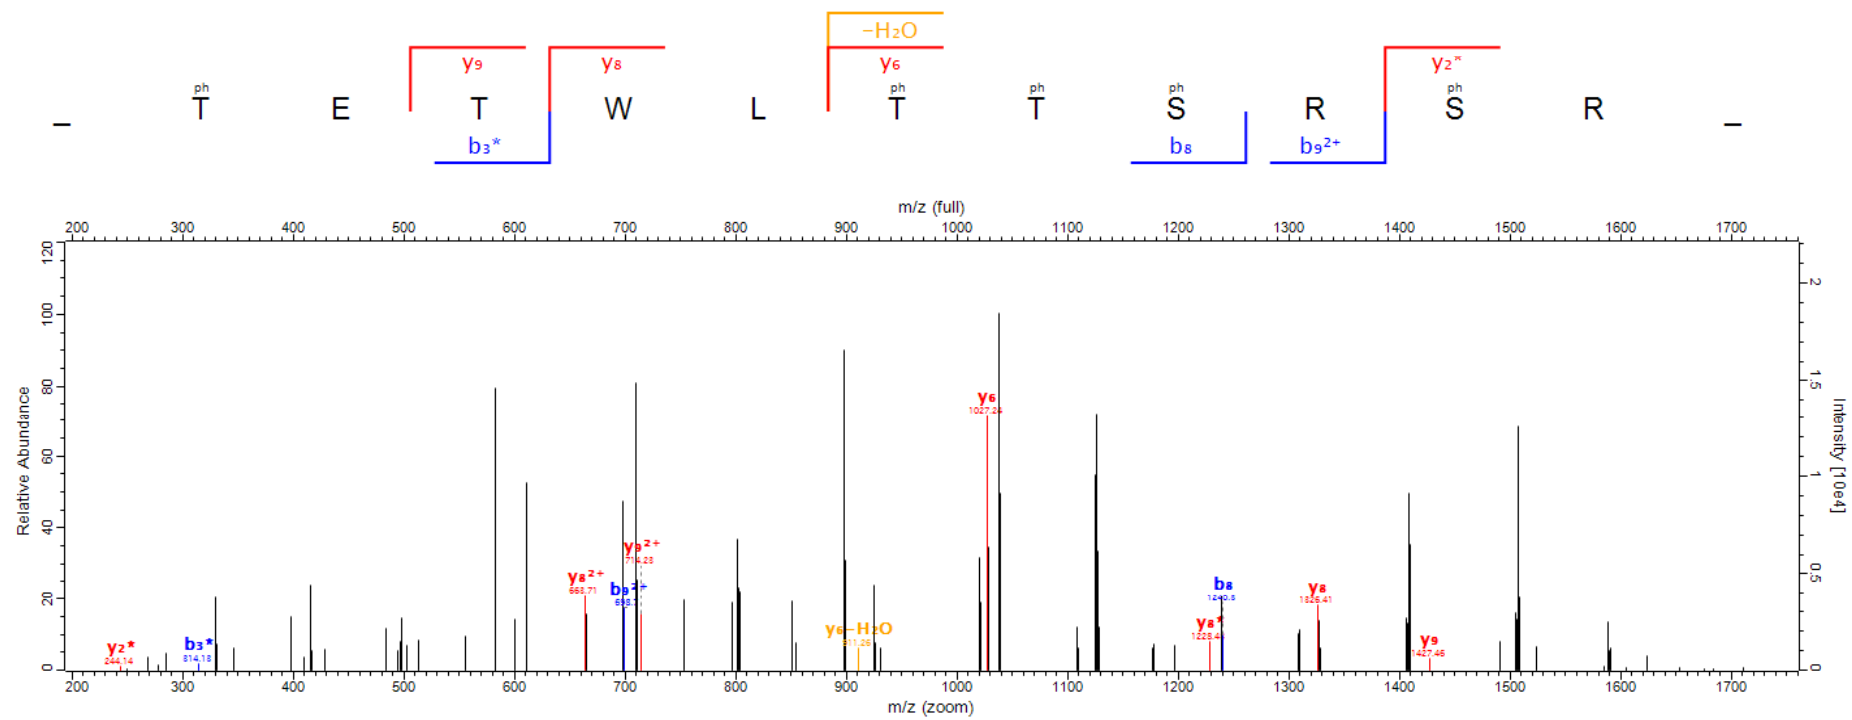

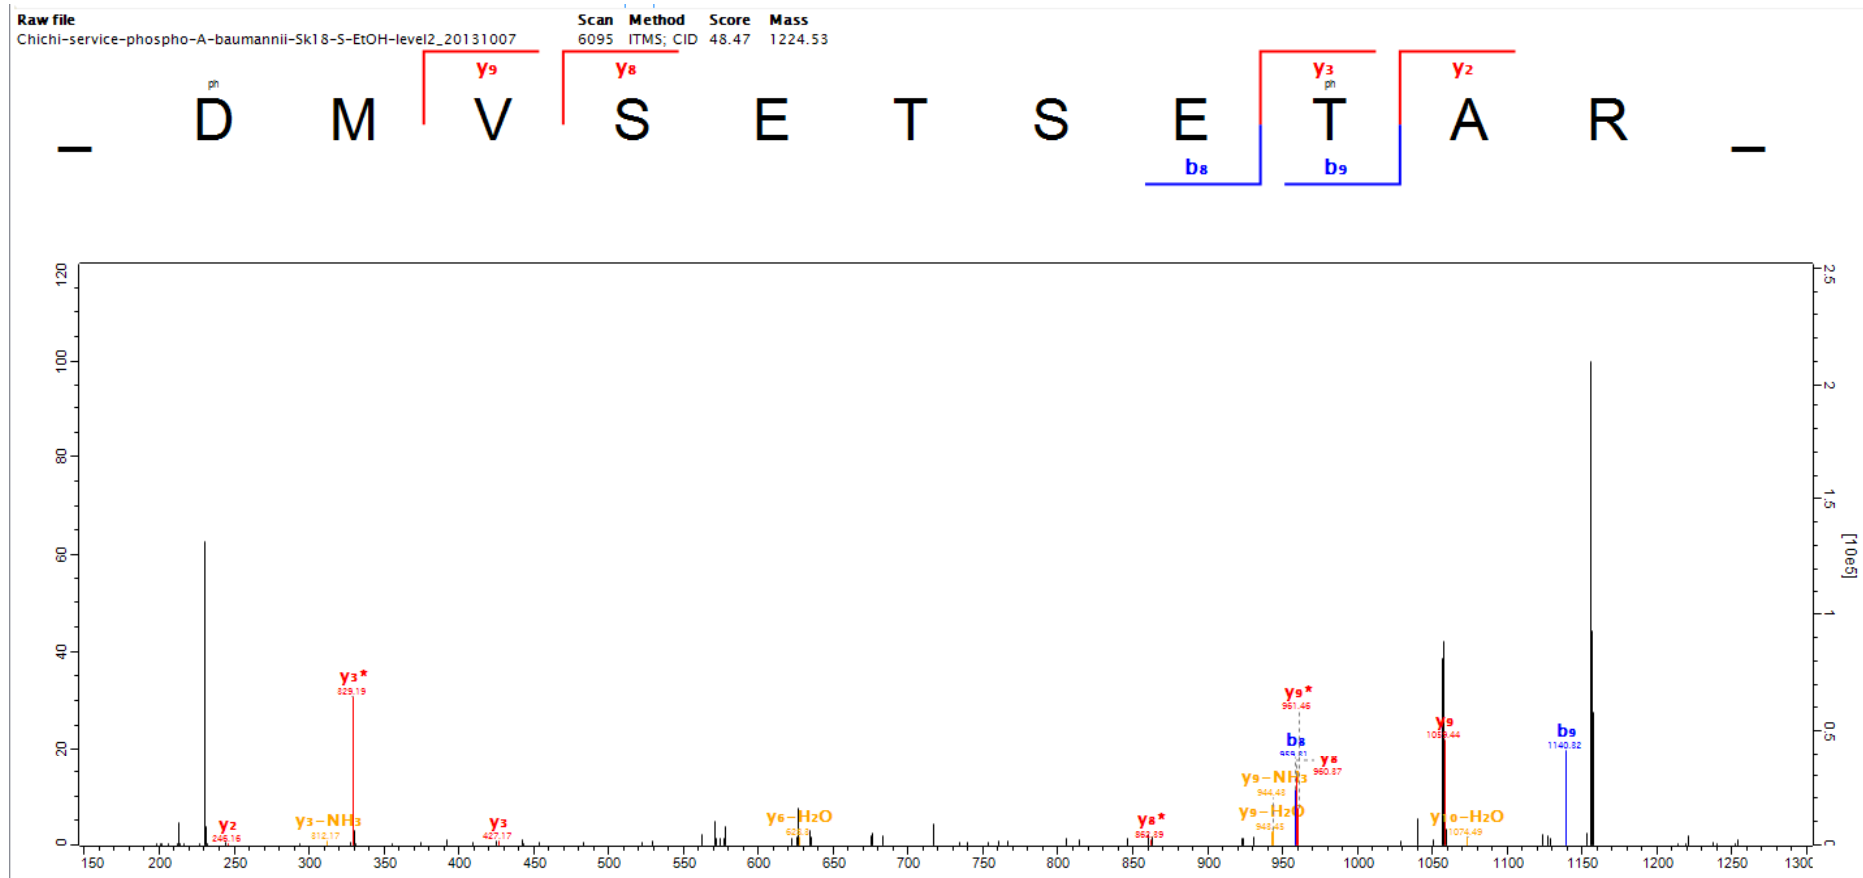

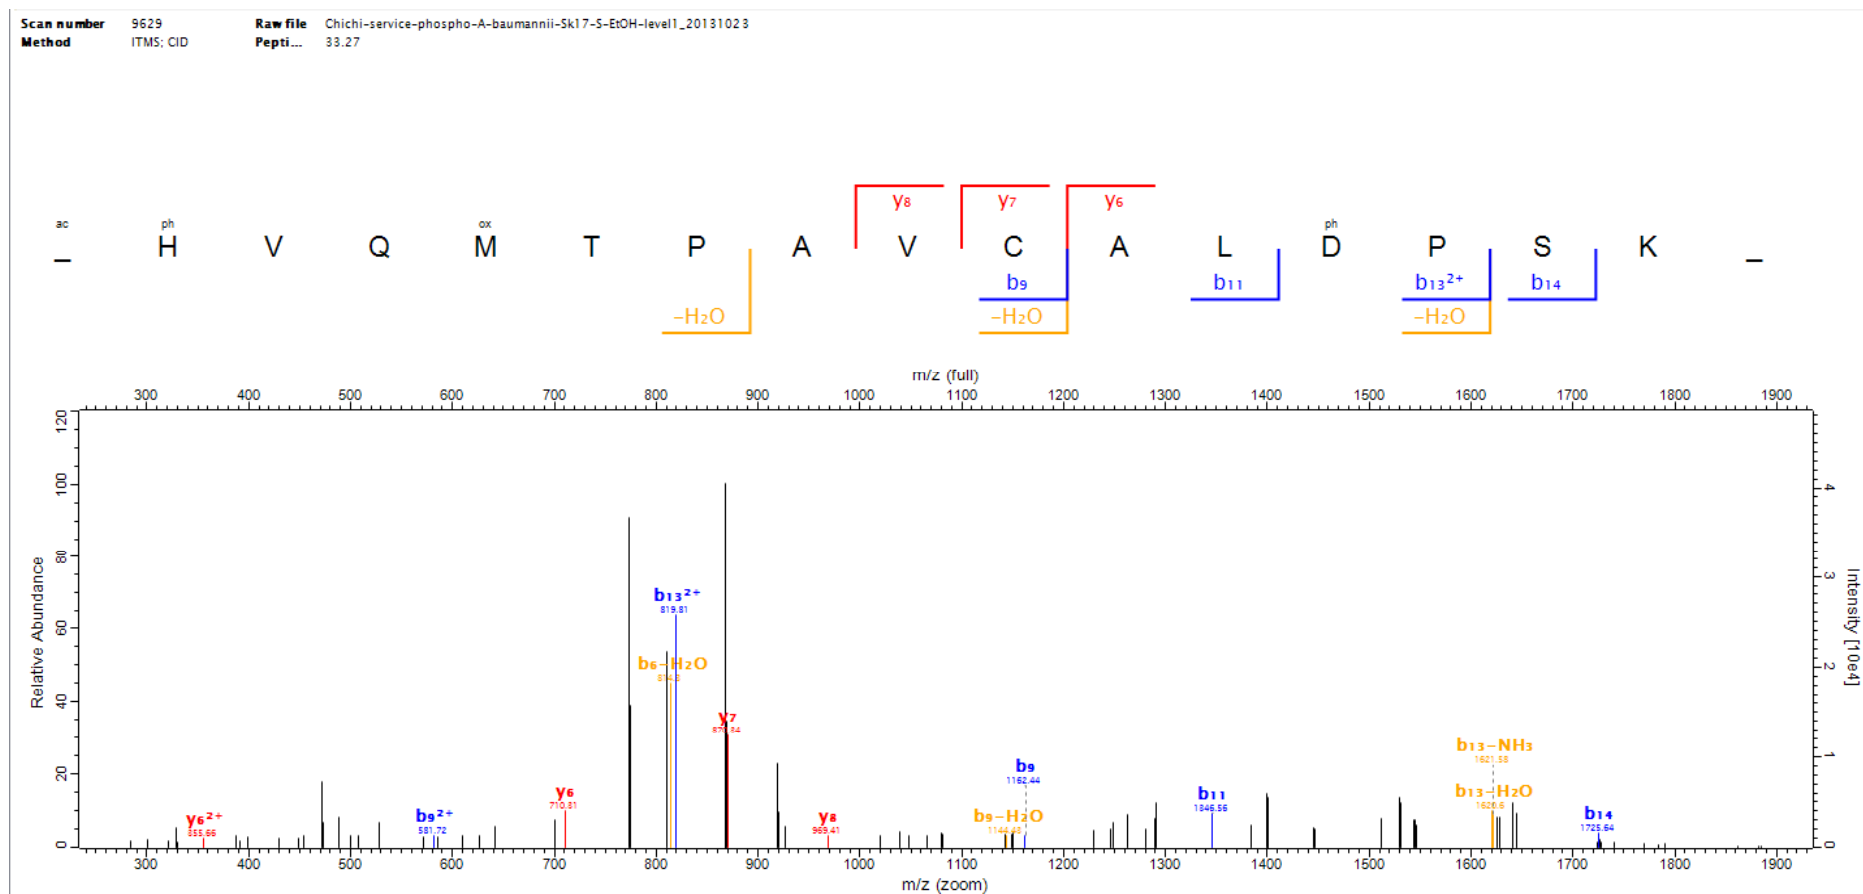

Scan number 5933 Raw file Chichi-service-phospho-A-baumannii-Sk18-5-PBS-level2\_20131007  
 Method ITMS: CID Pepti... 60.3

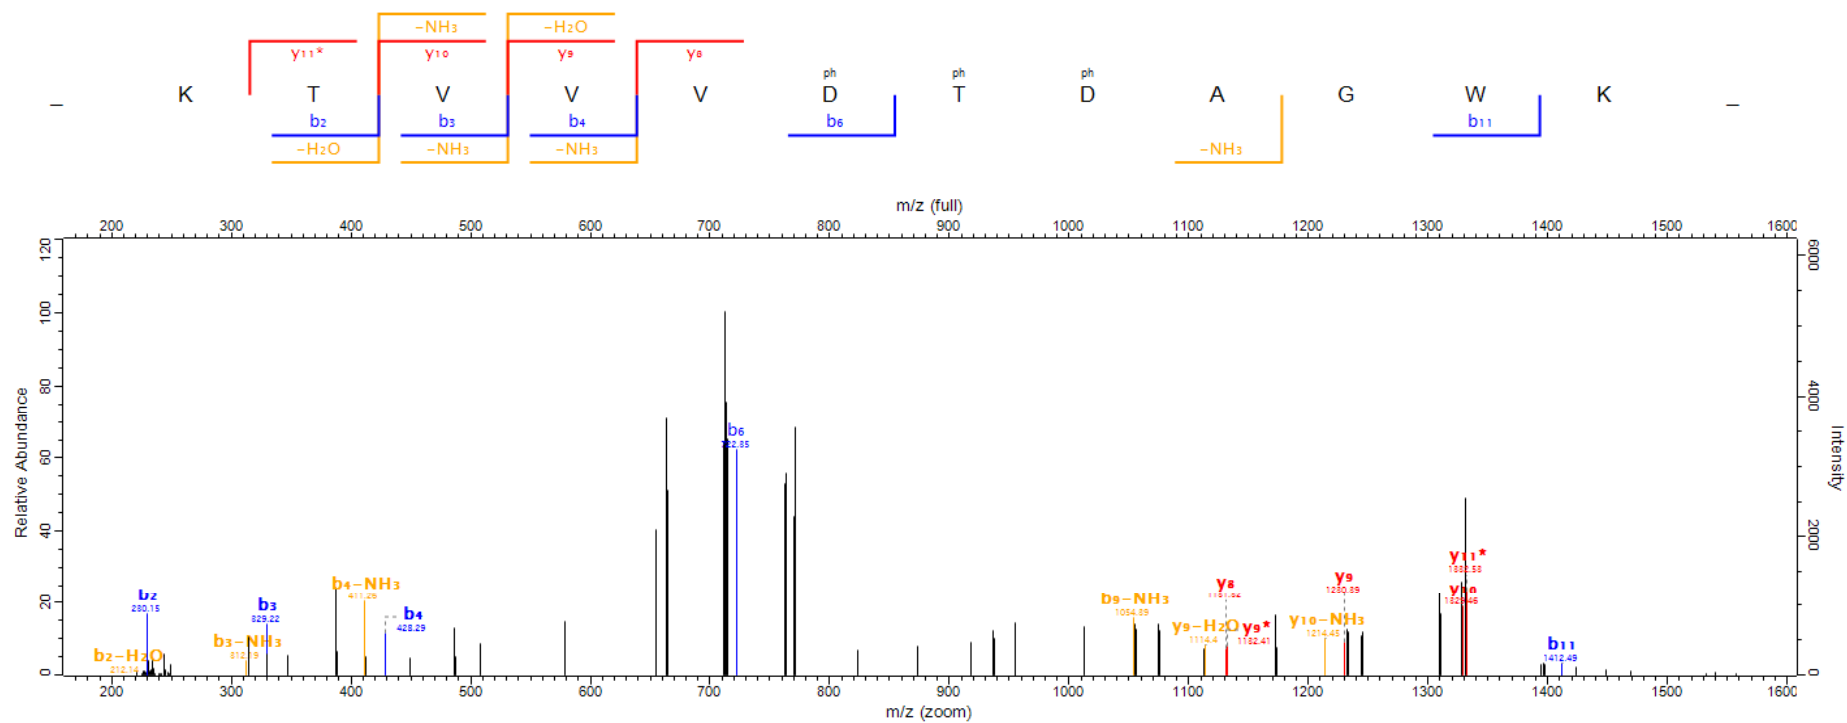

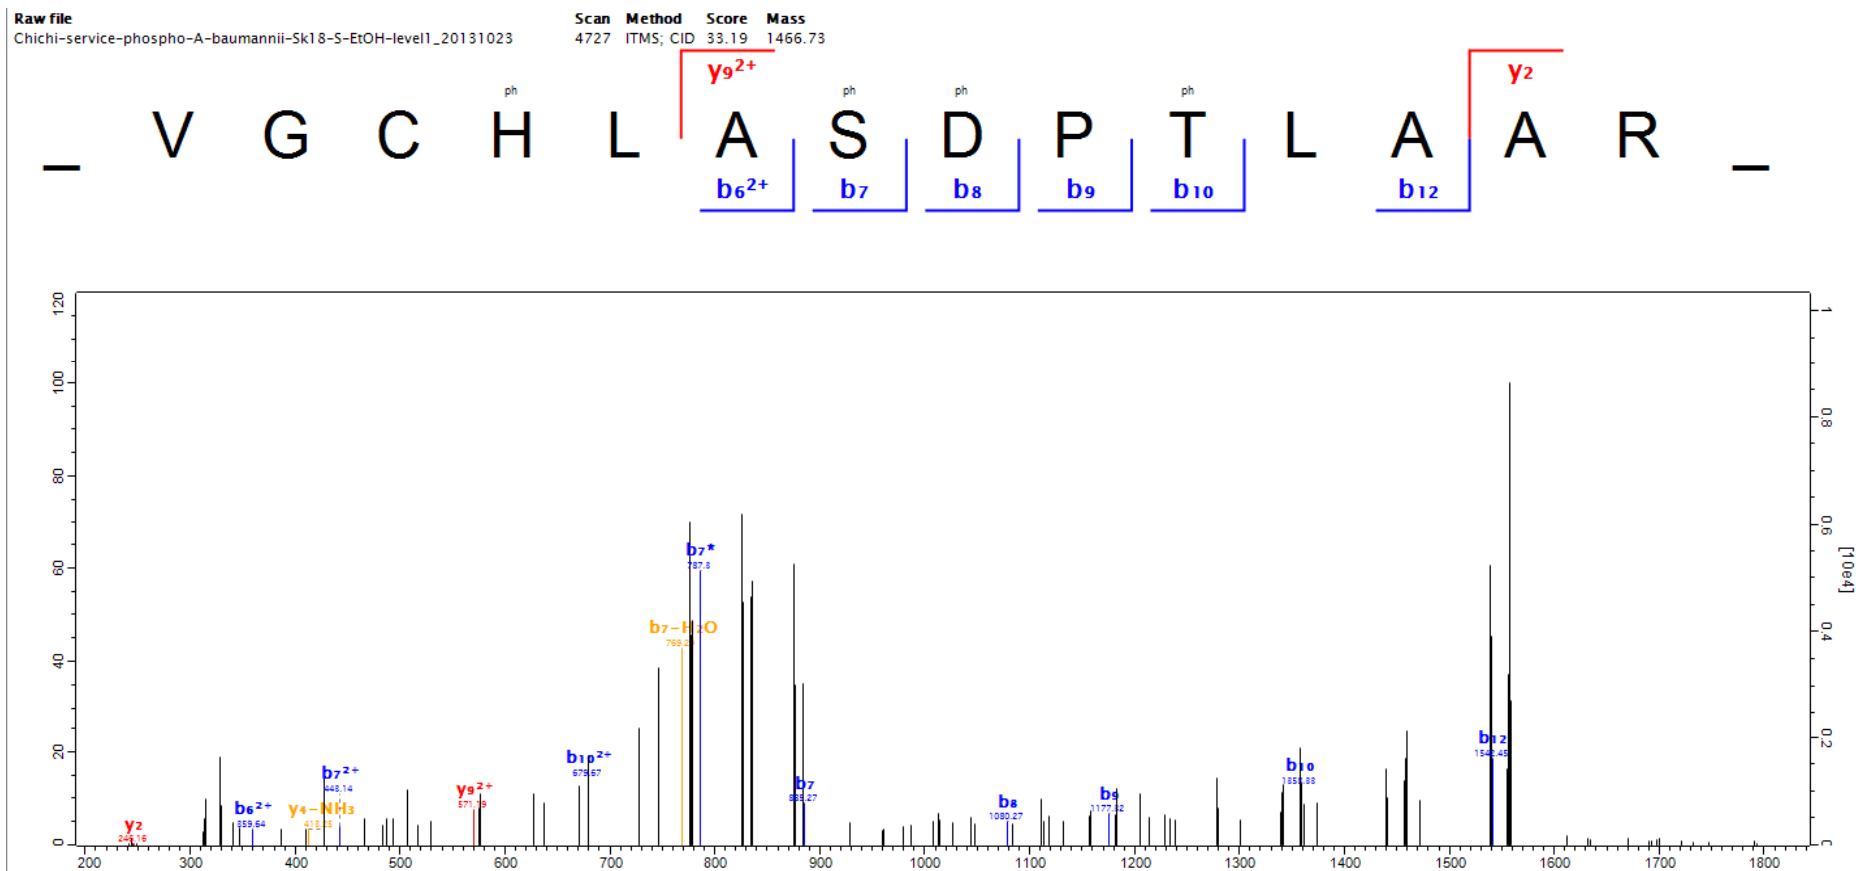



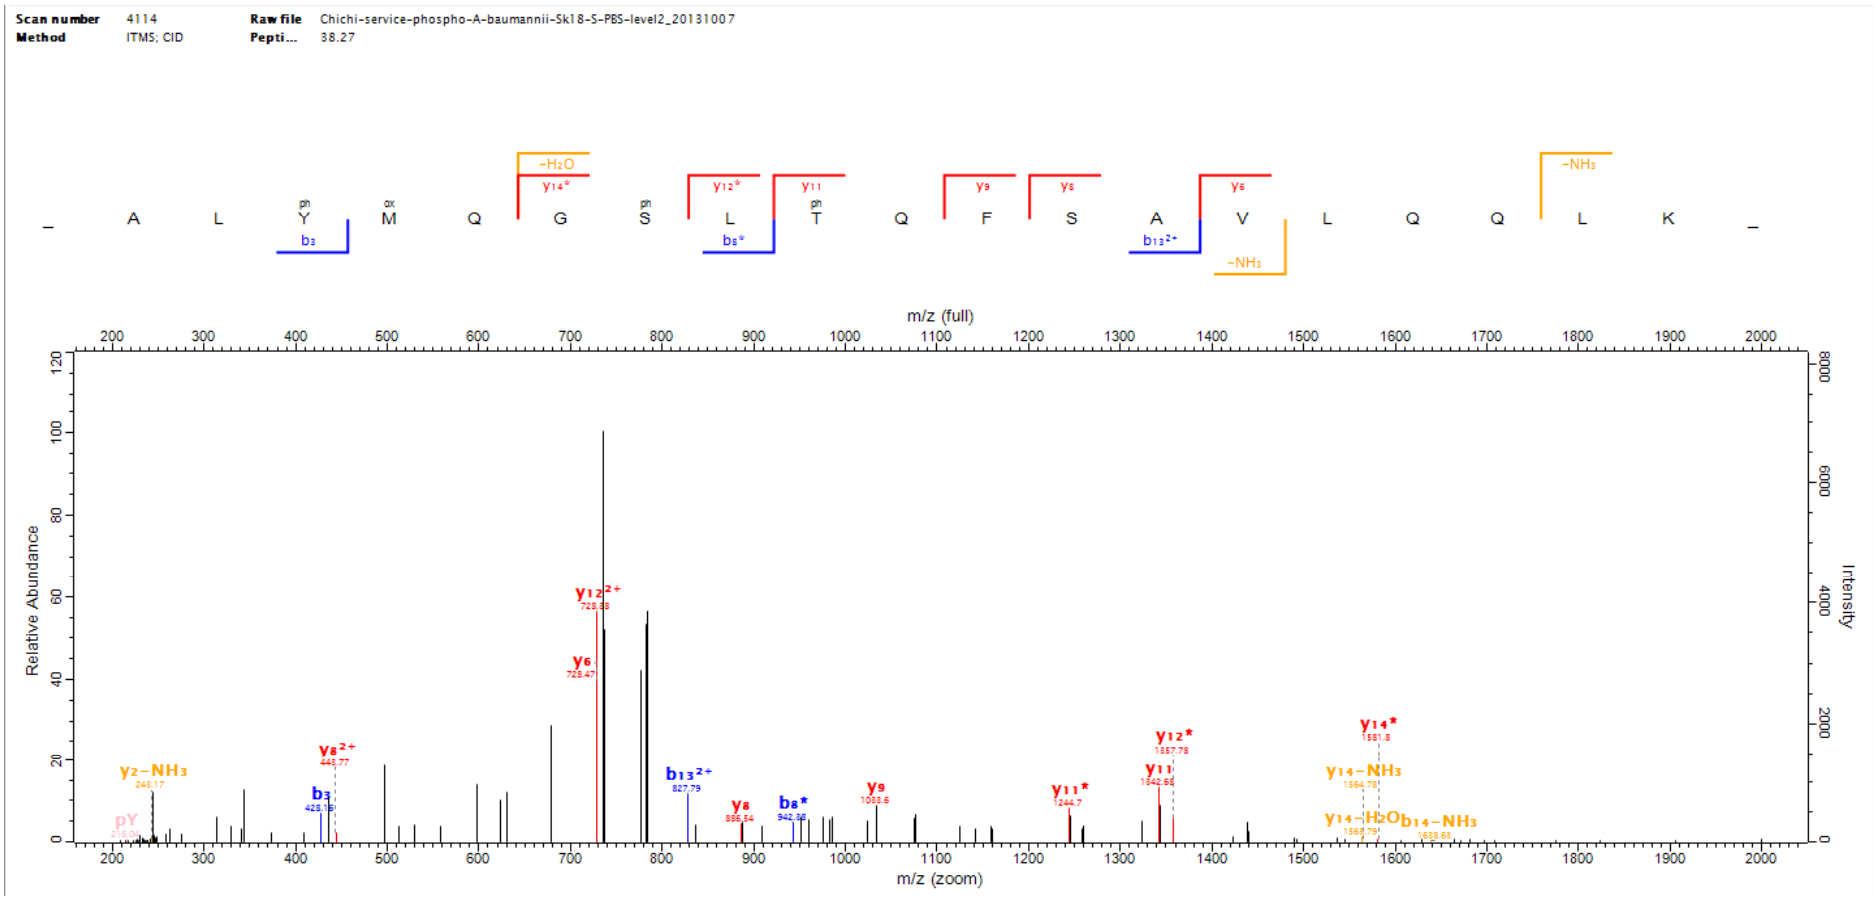

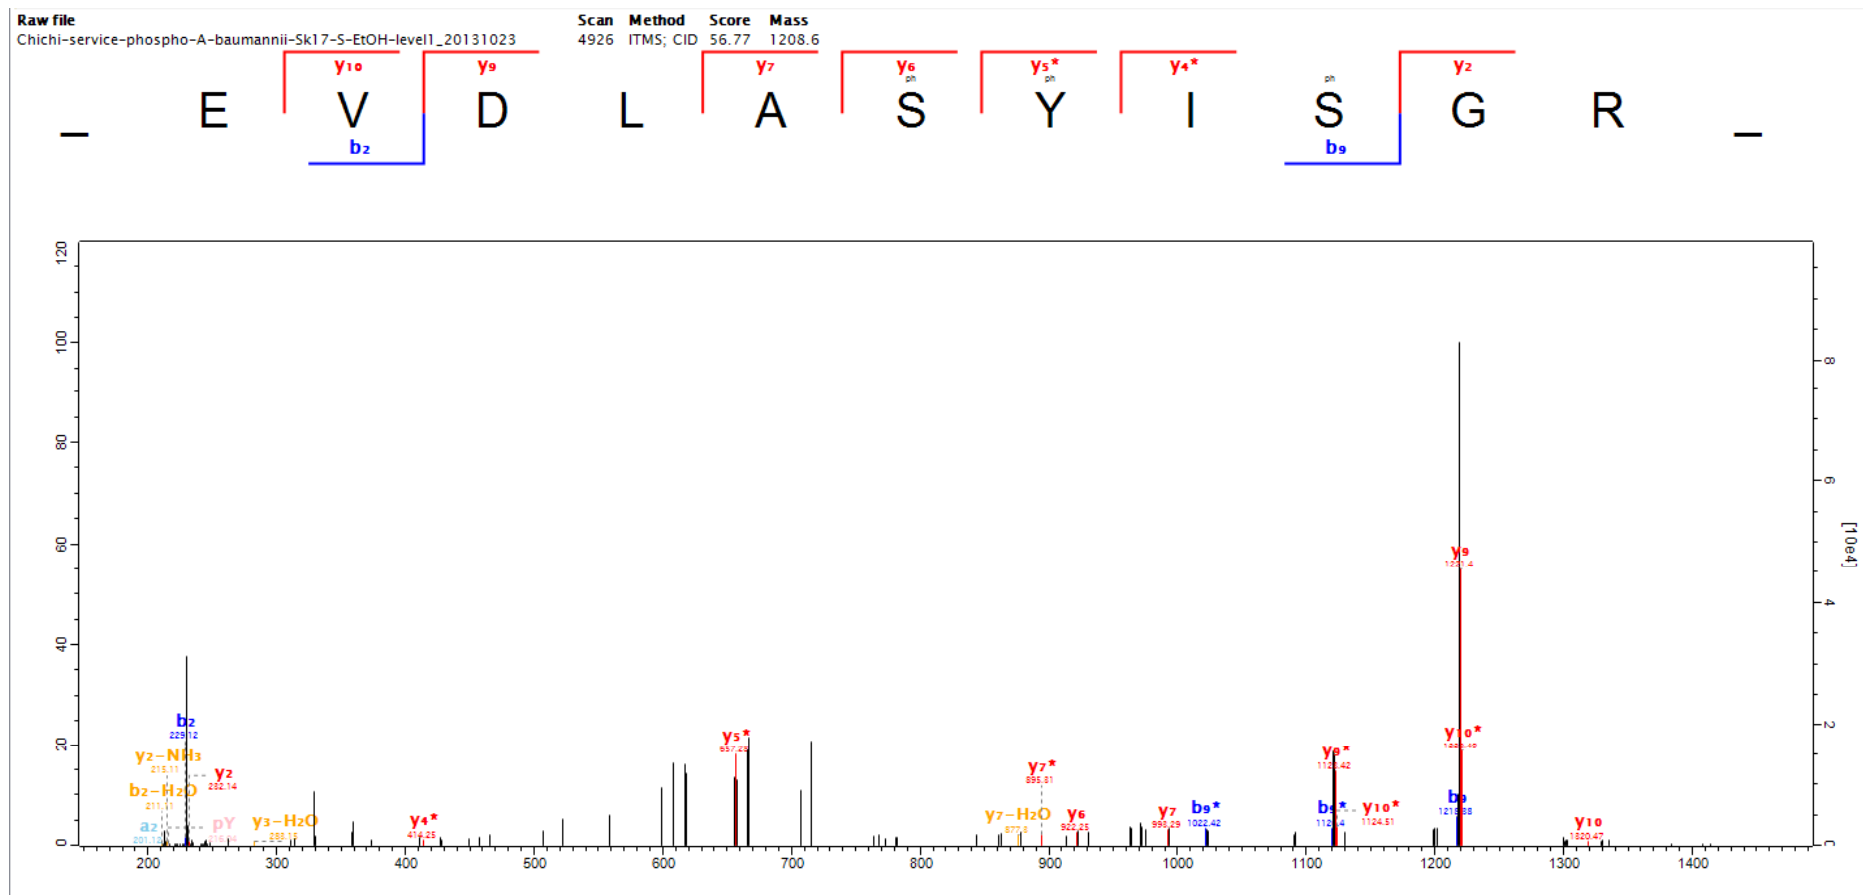

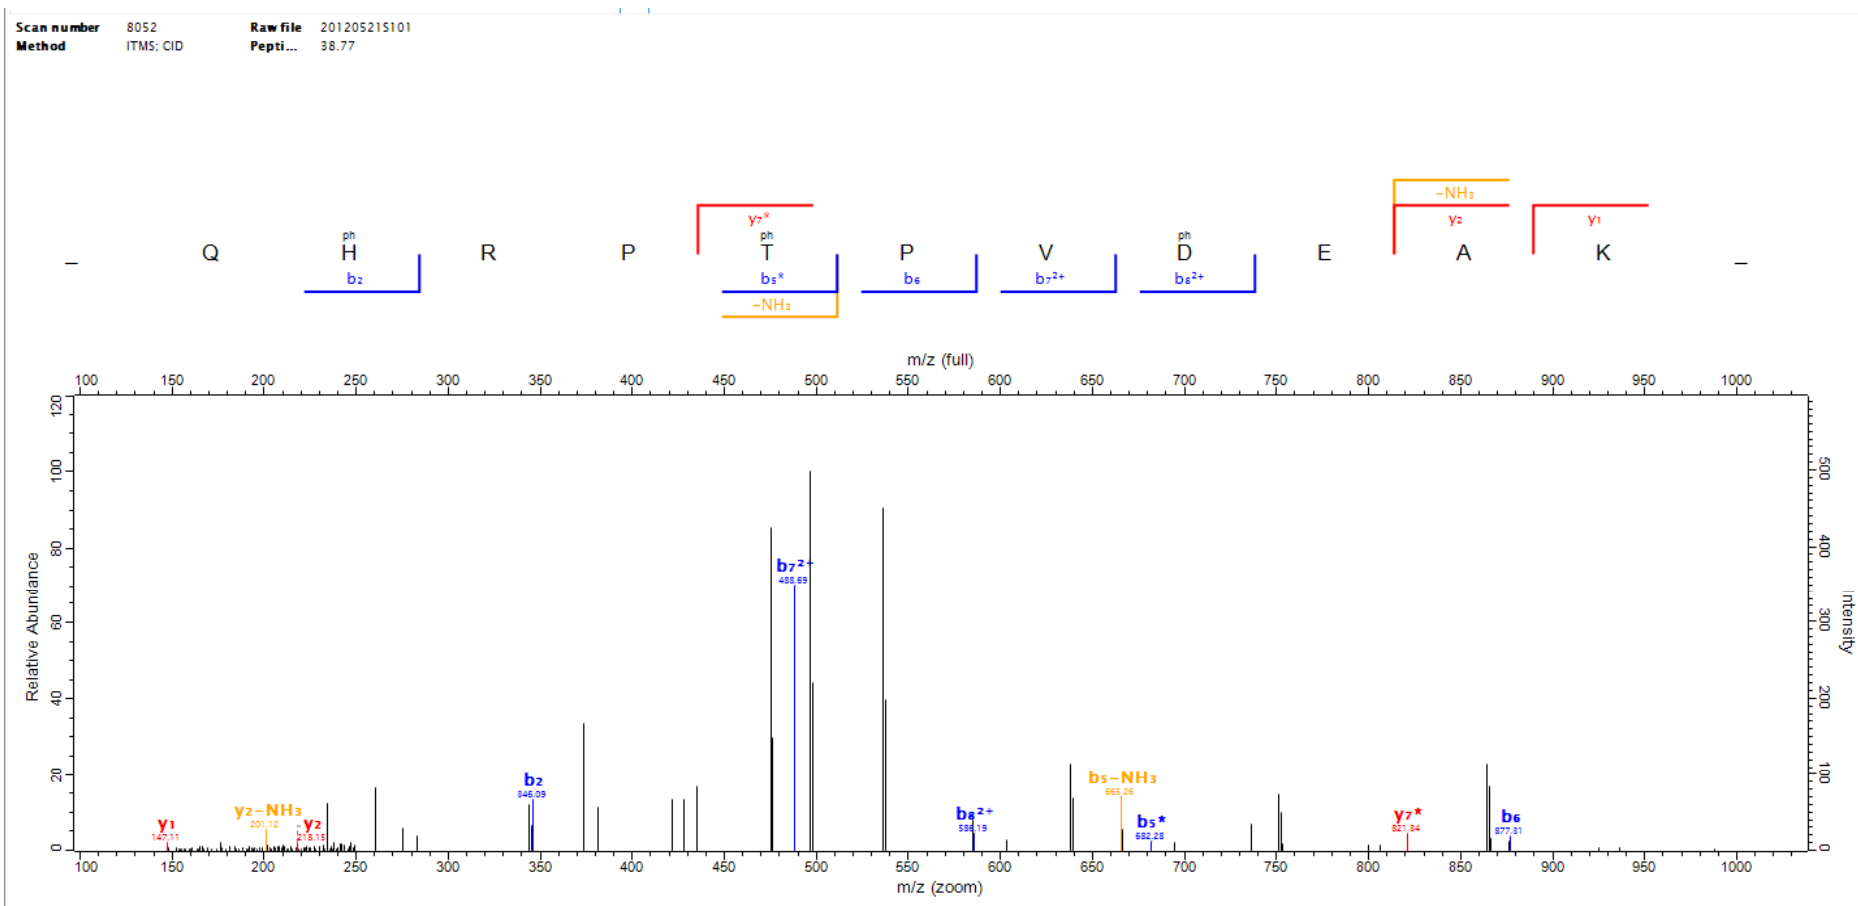

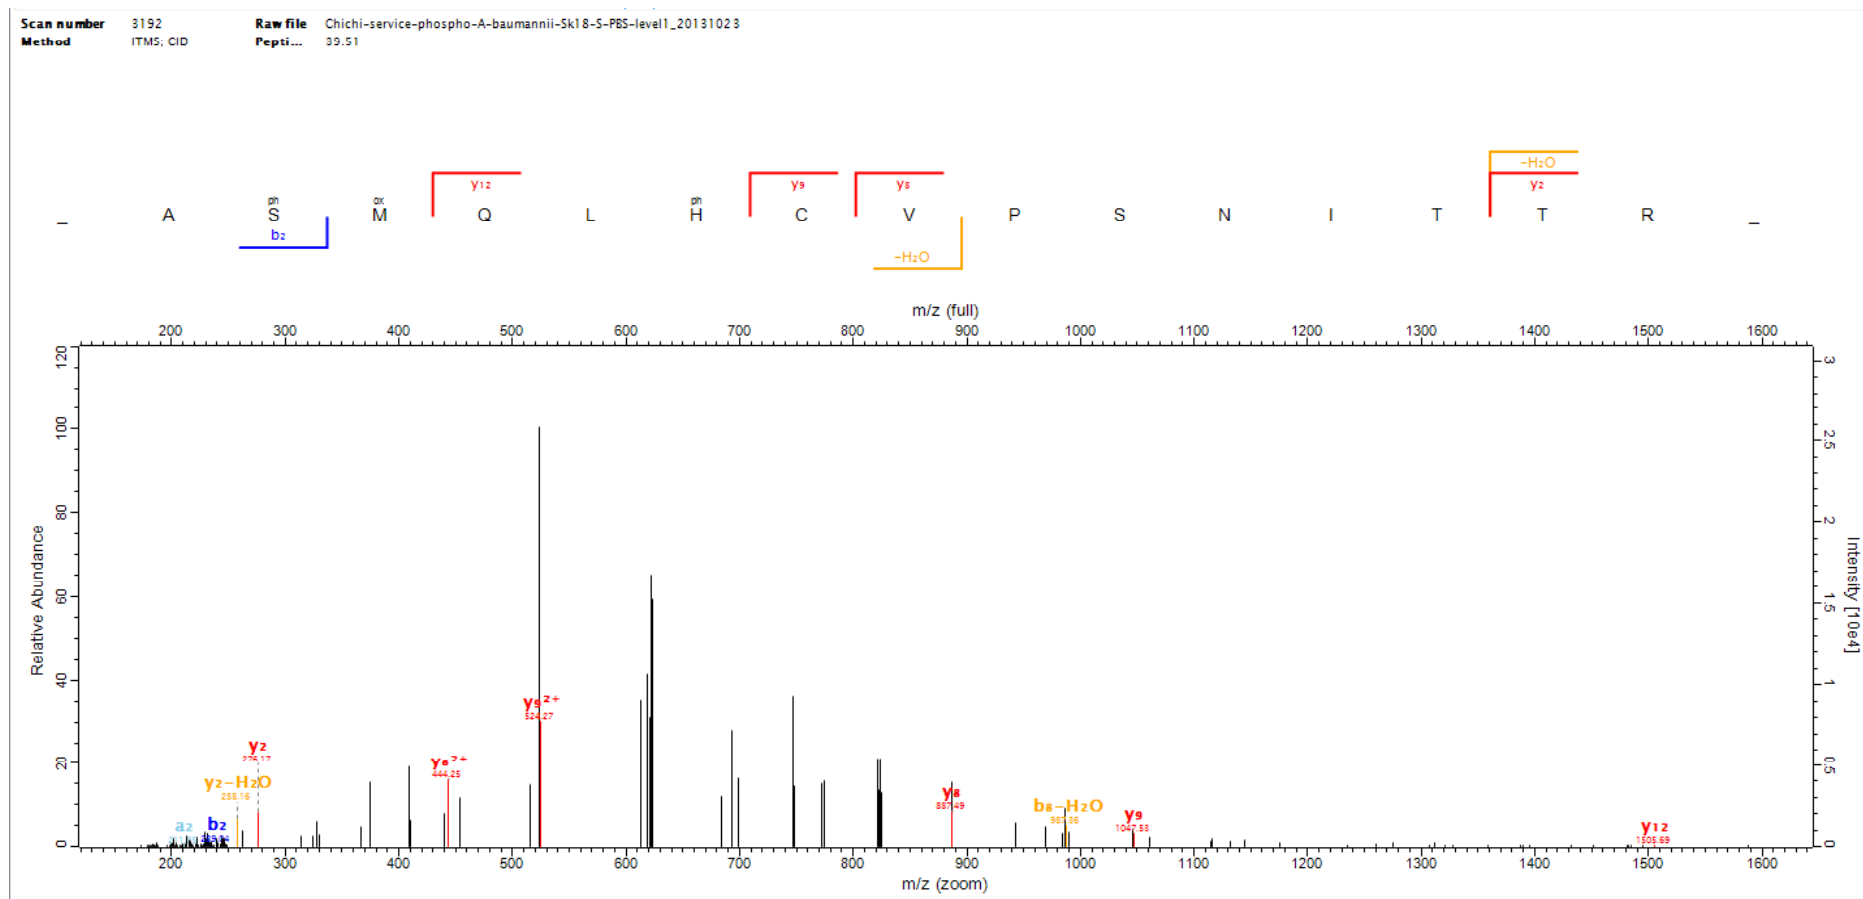

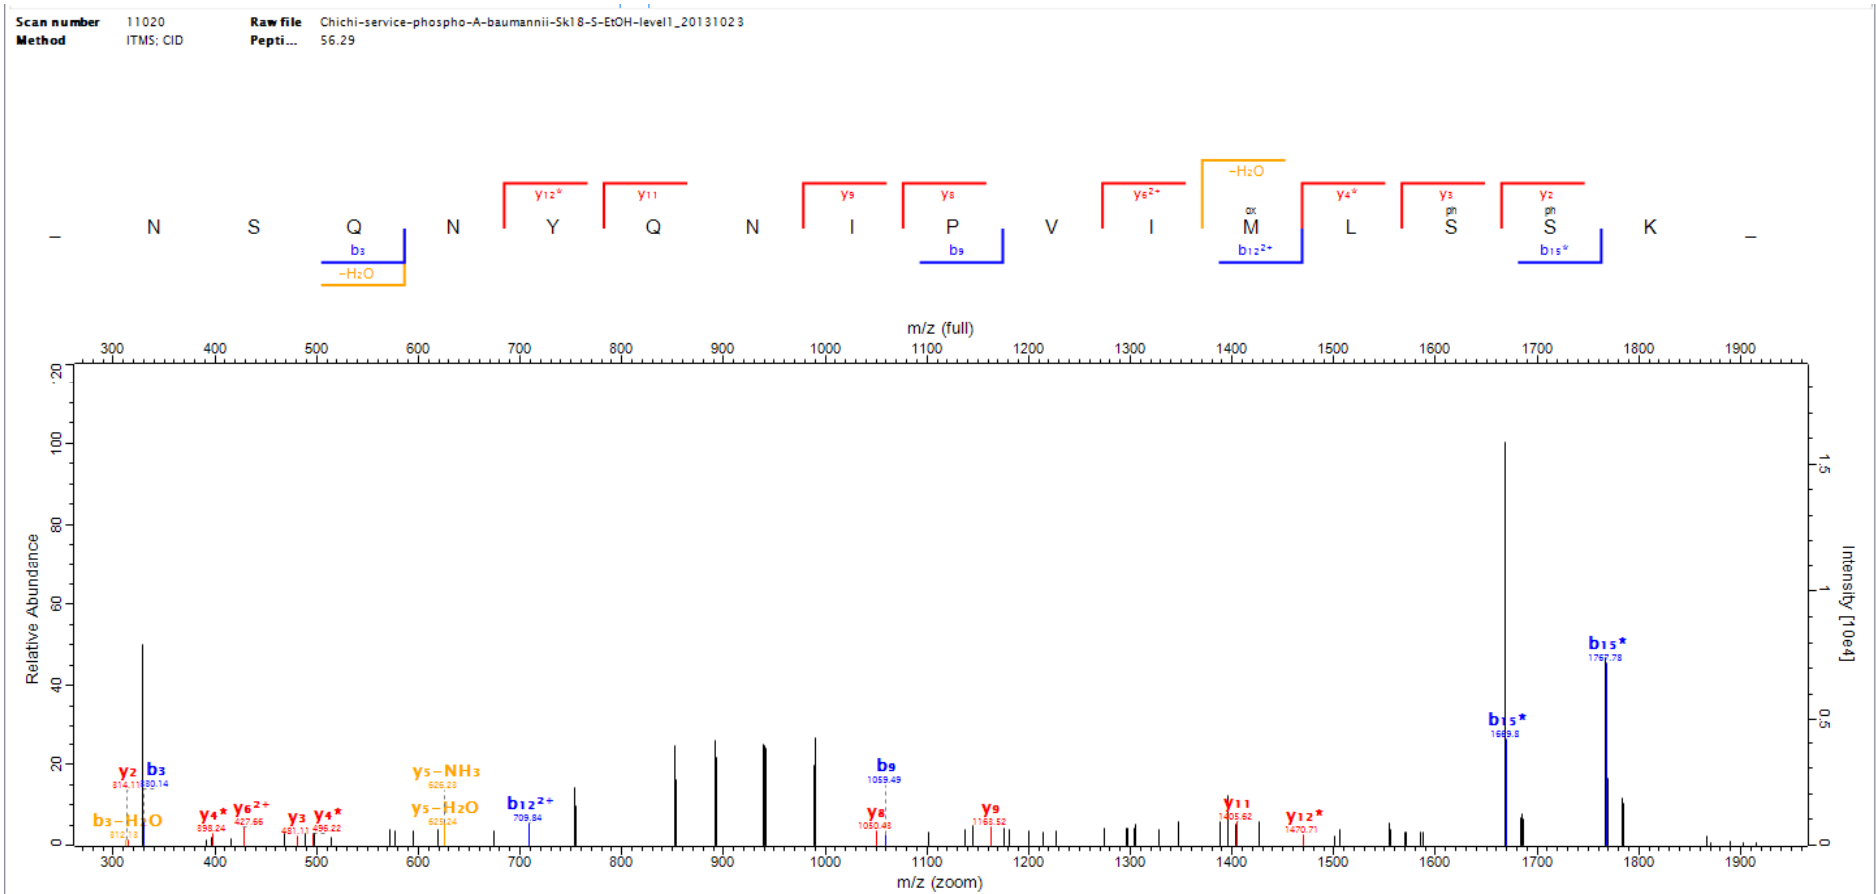

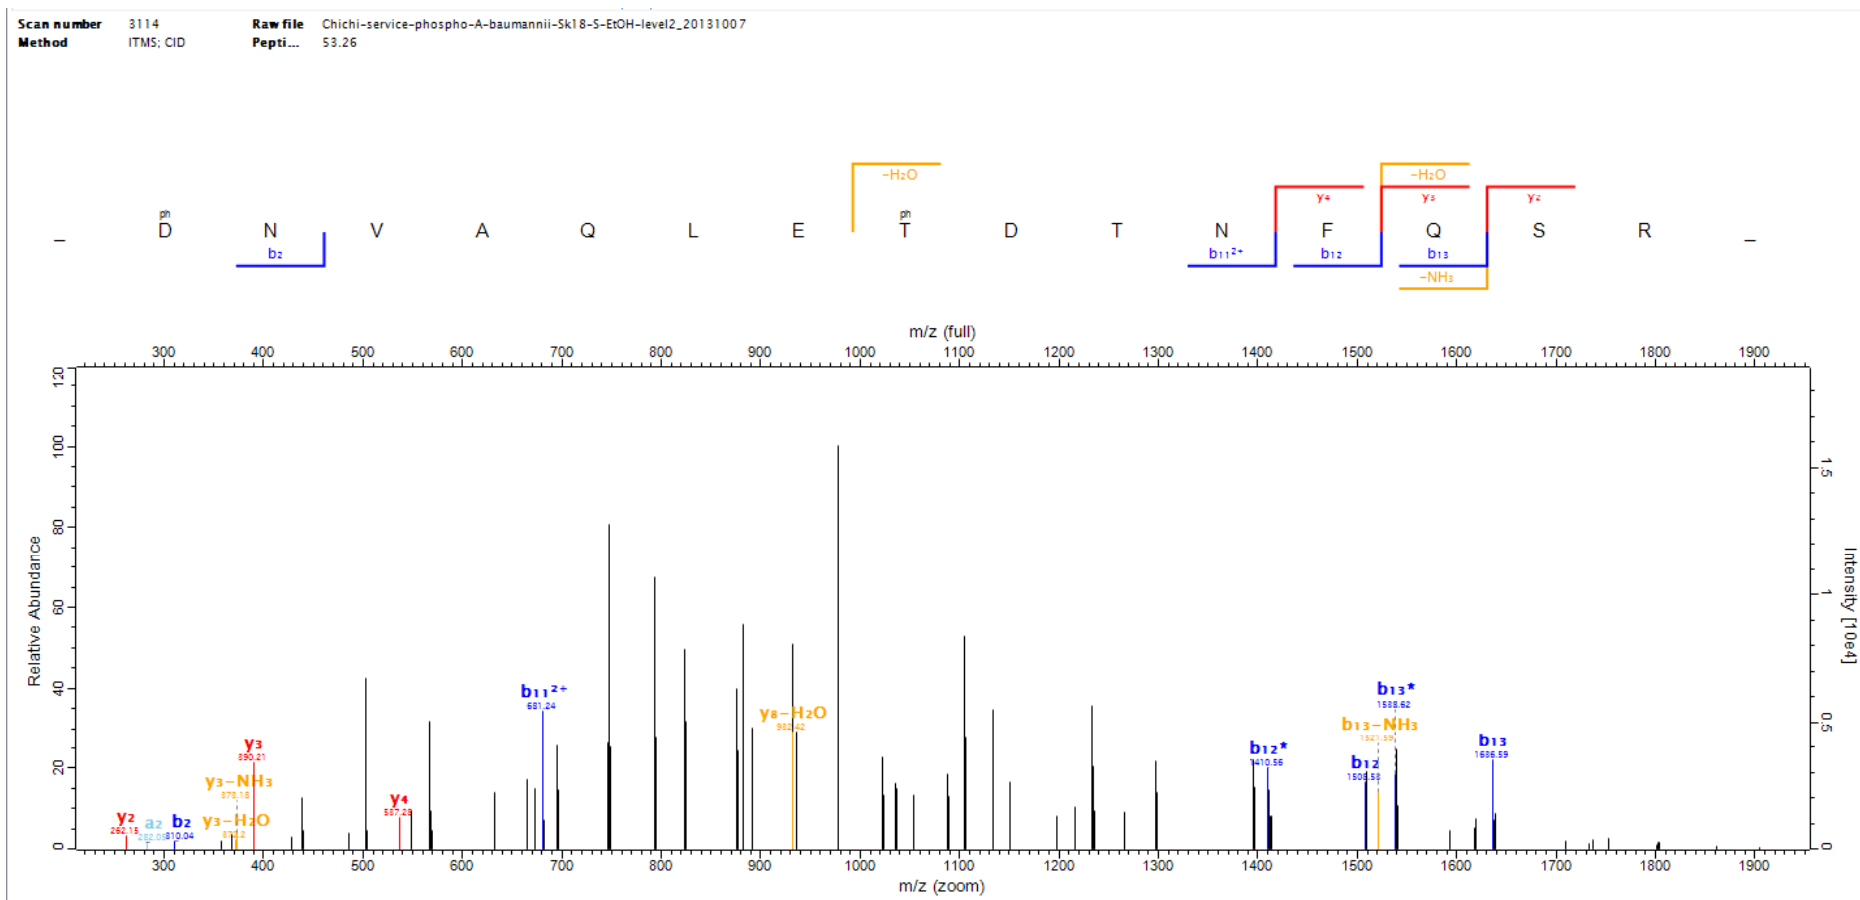

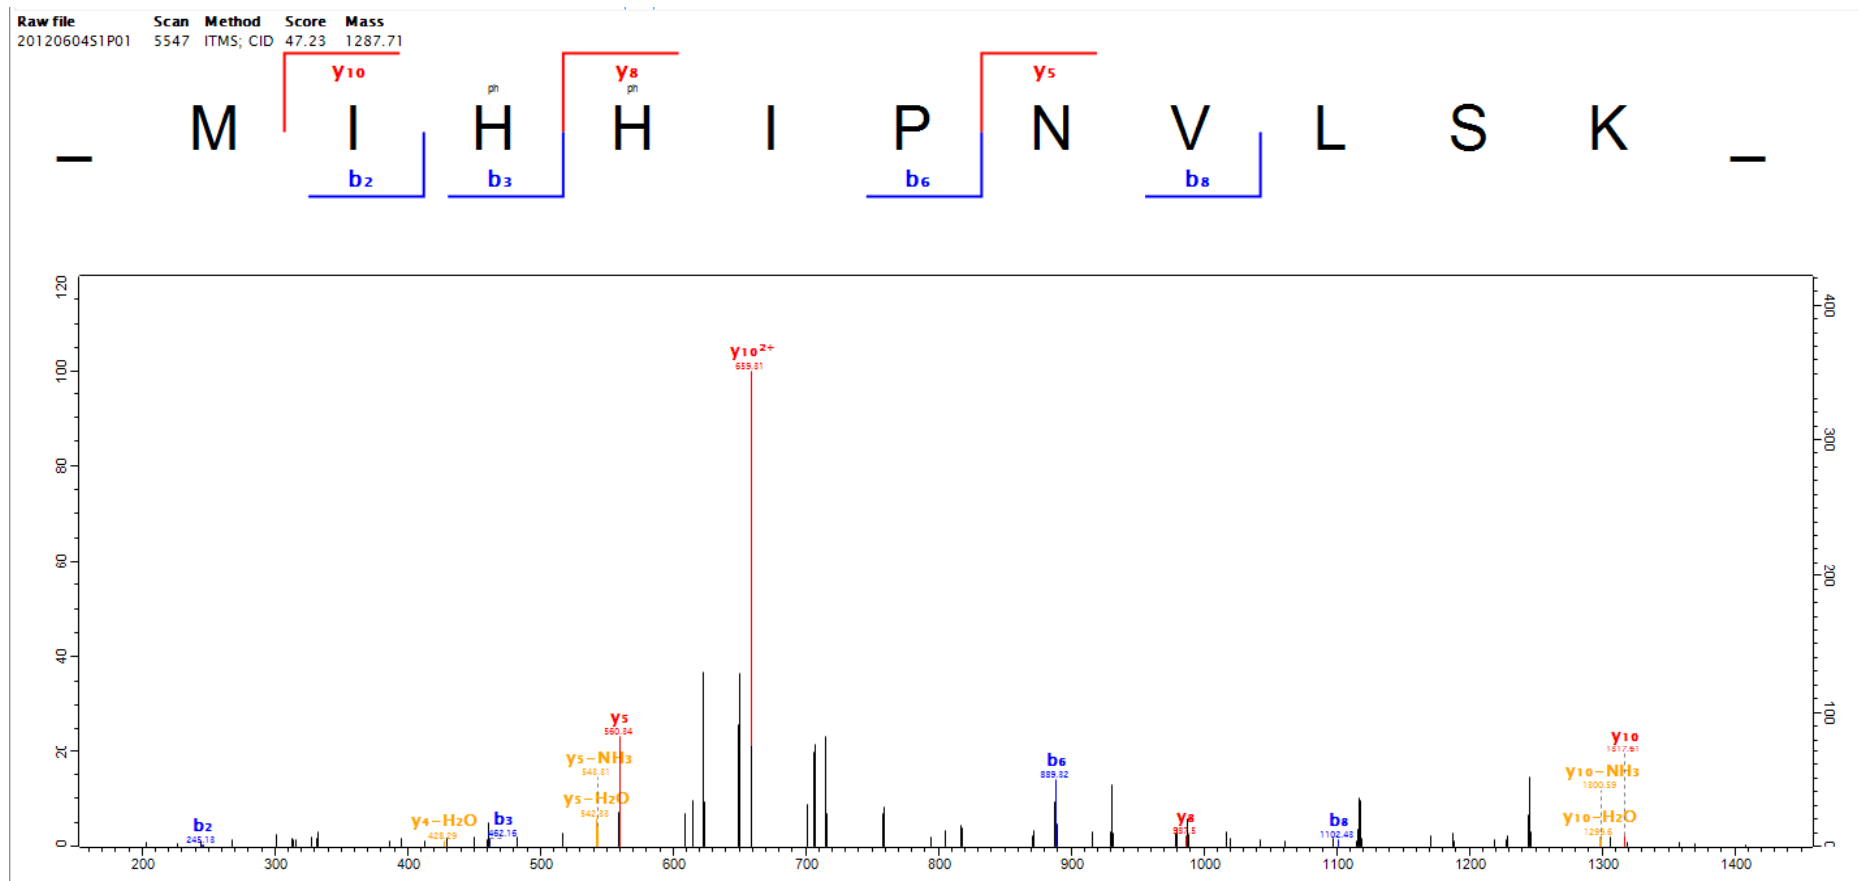

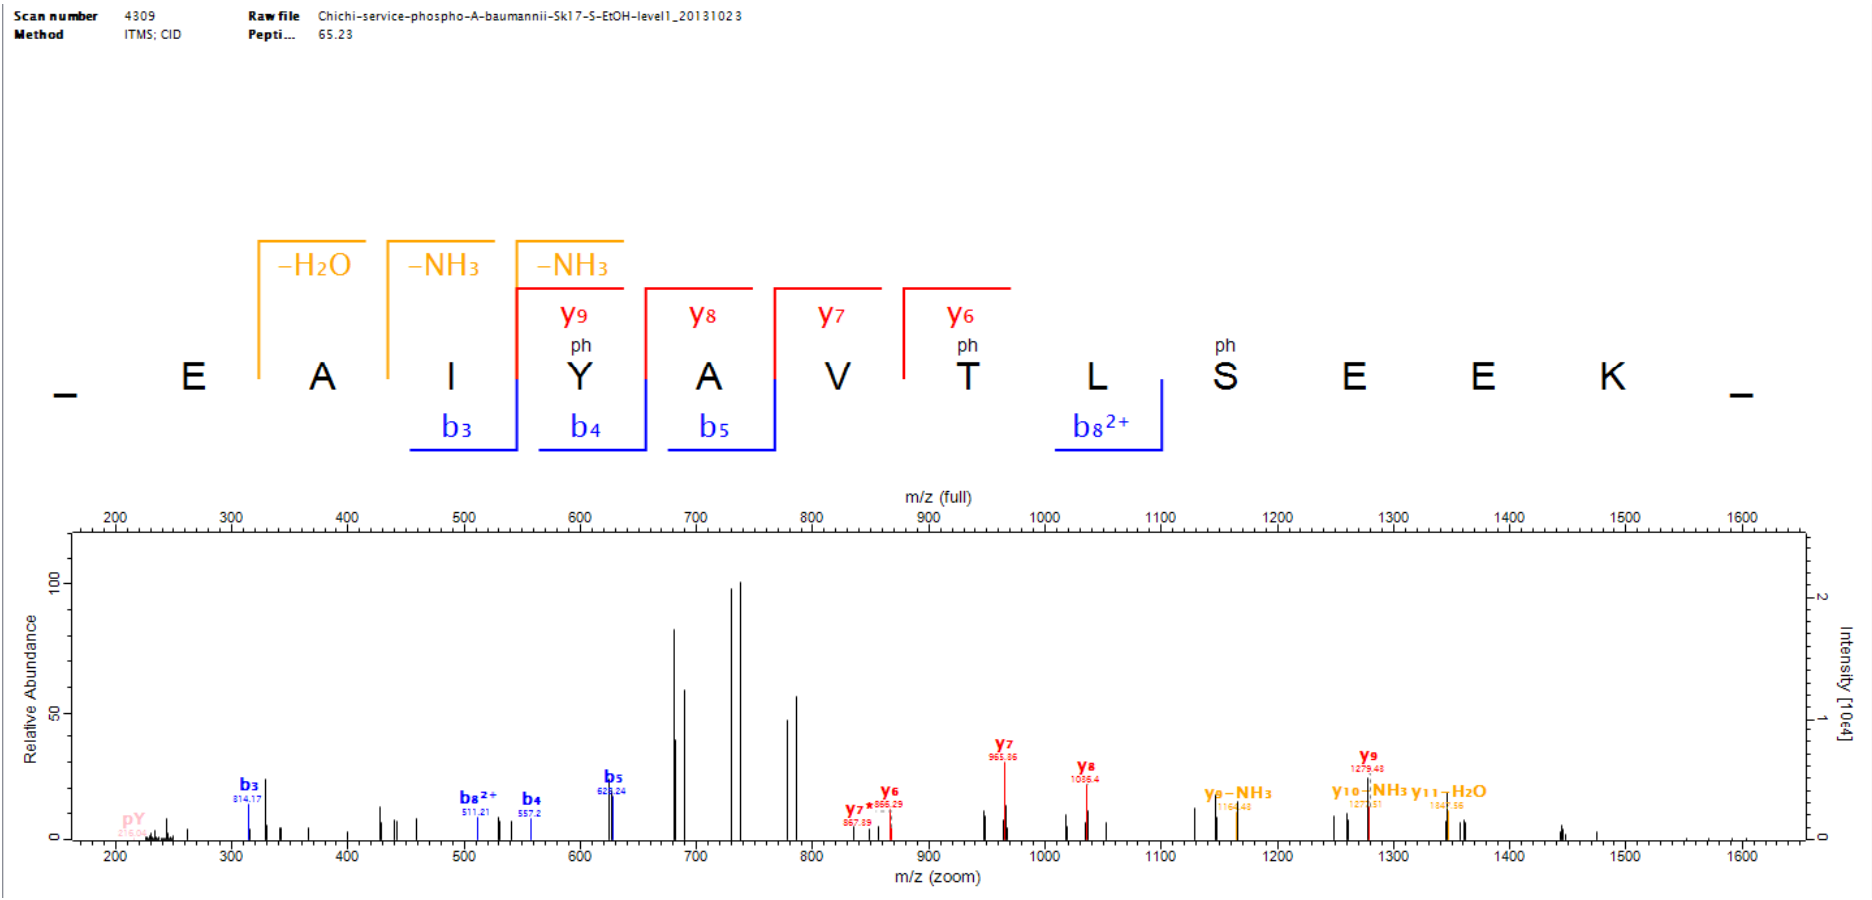



Raw file Scan Method Score Mass  
 AB-175-F5 6451 ITMS; CID 31.35 1303.59

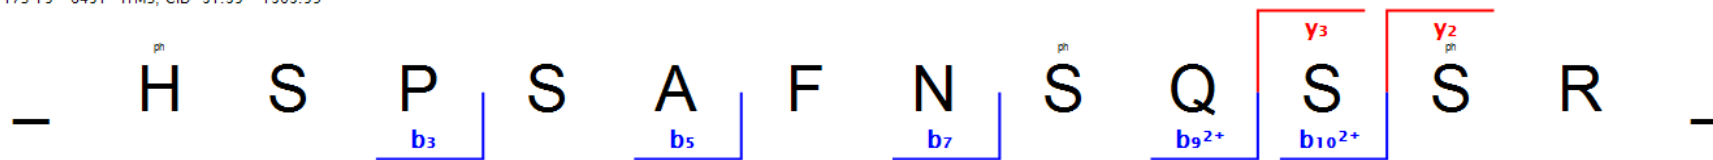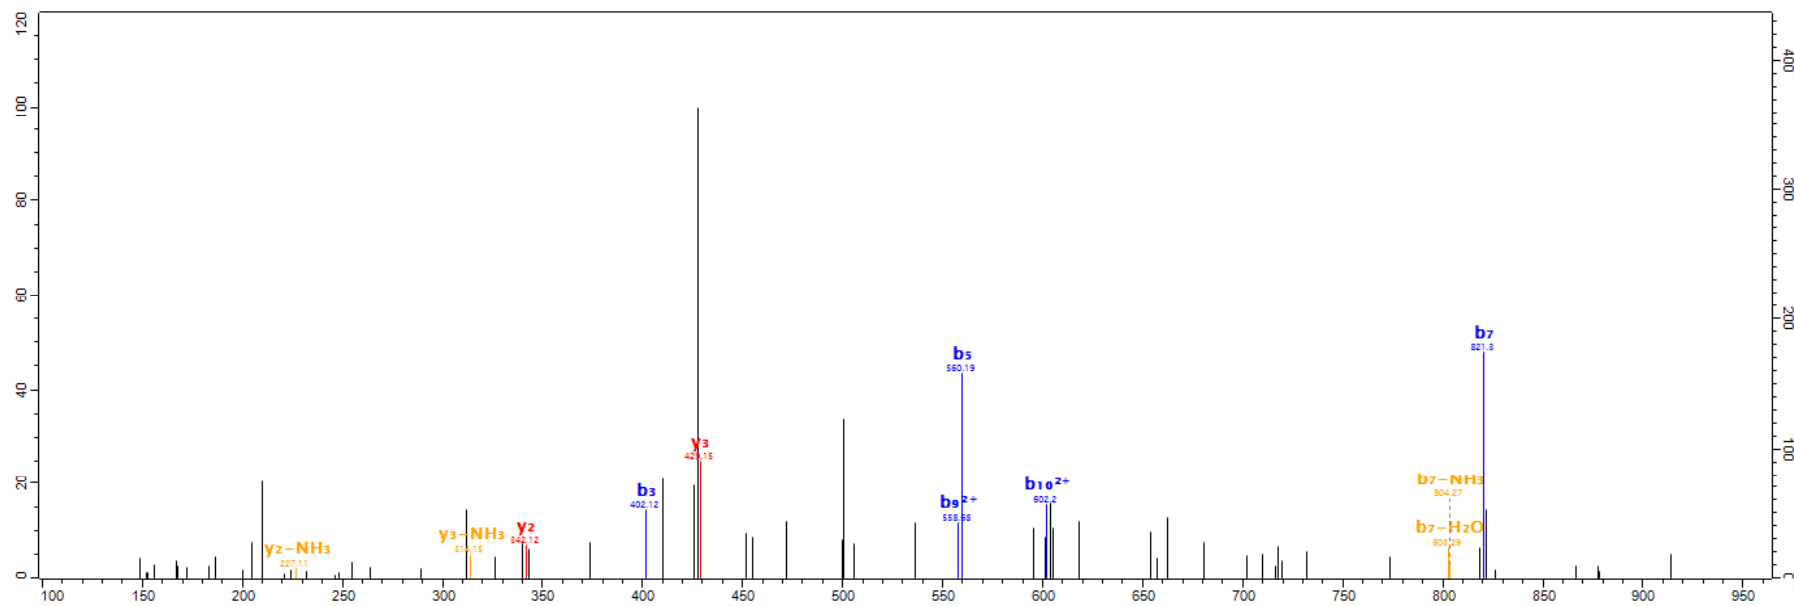

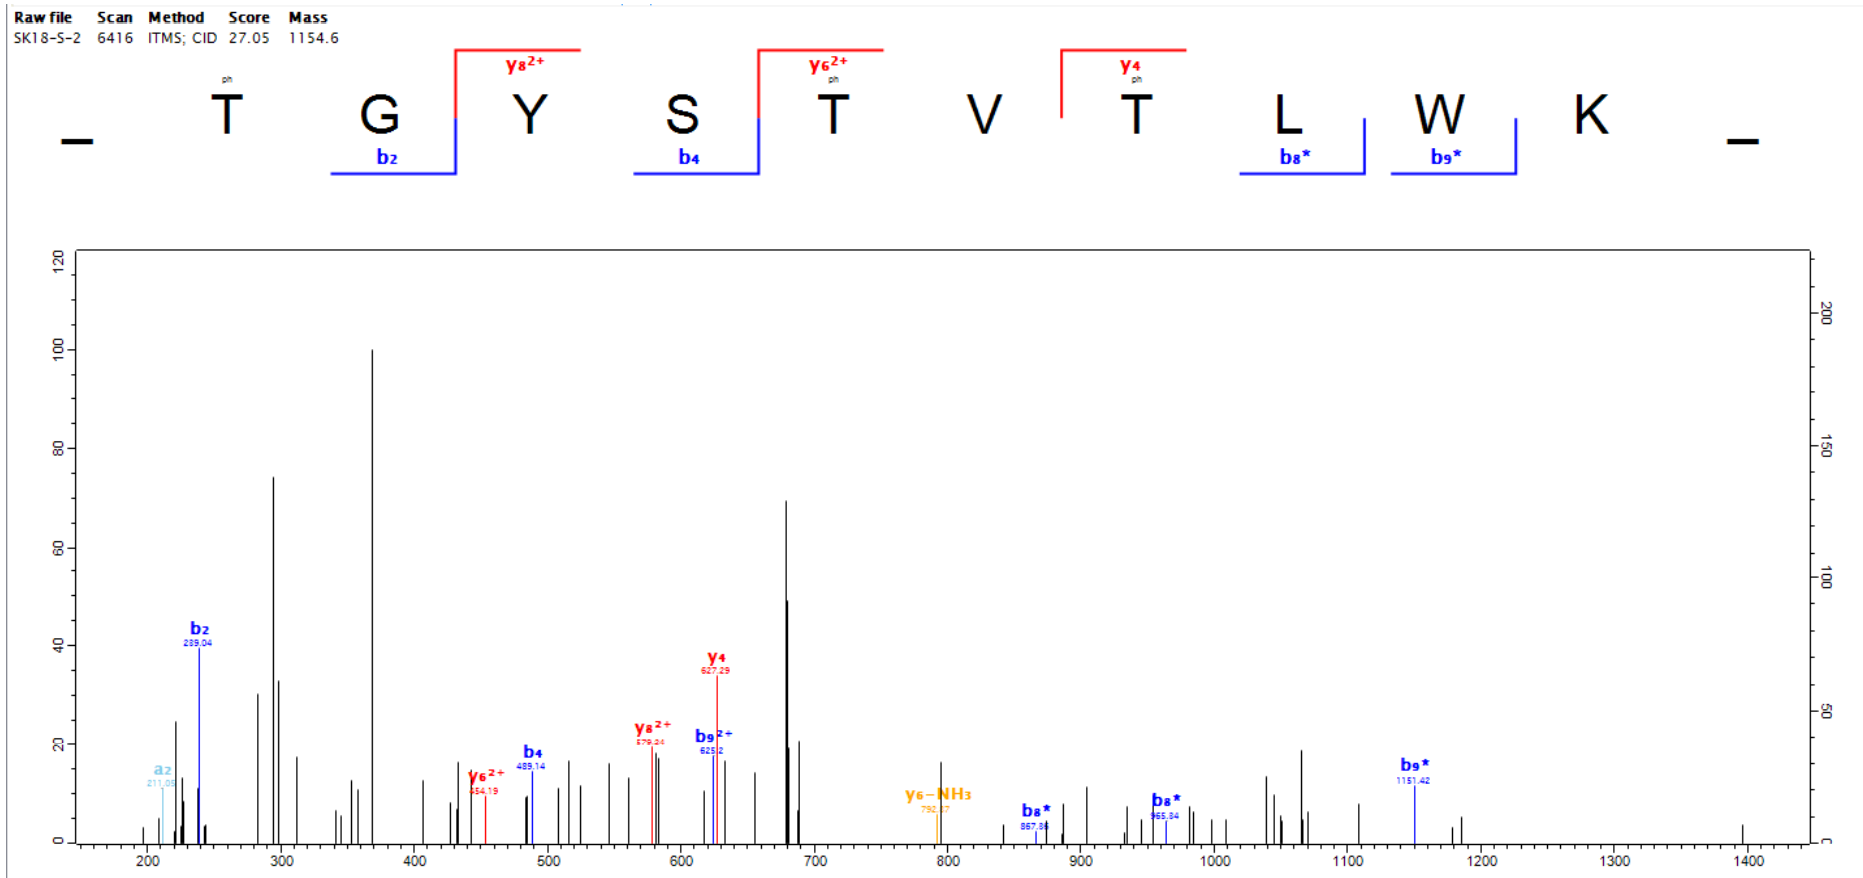

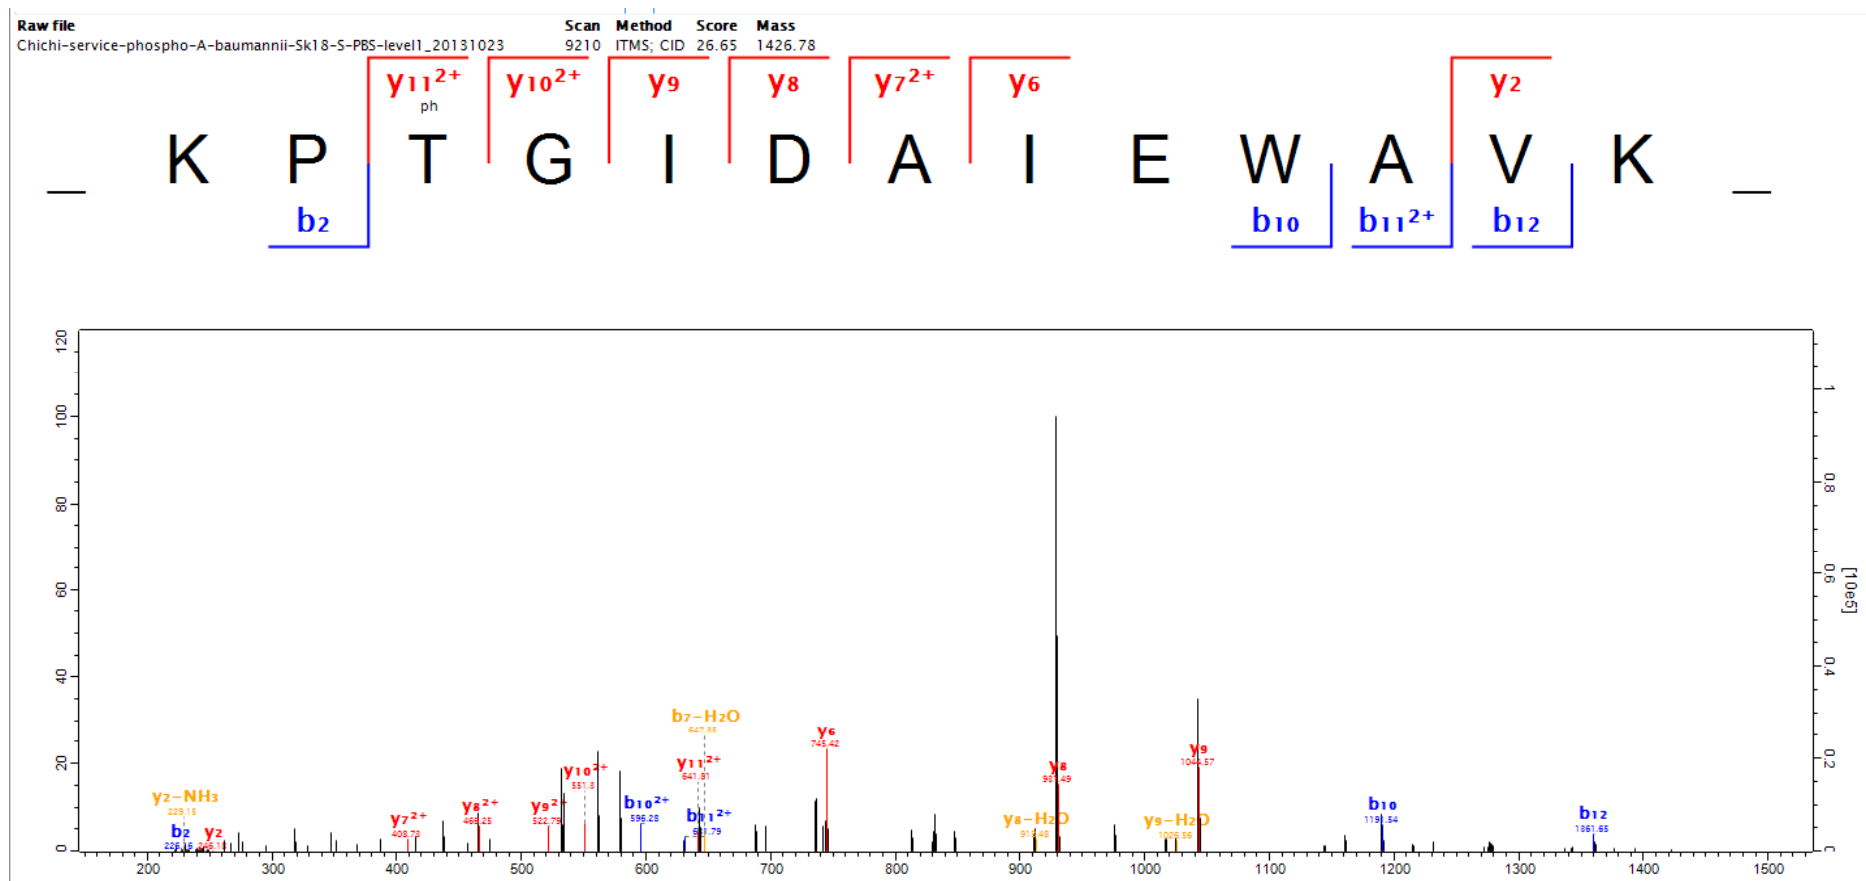

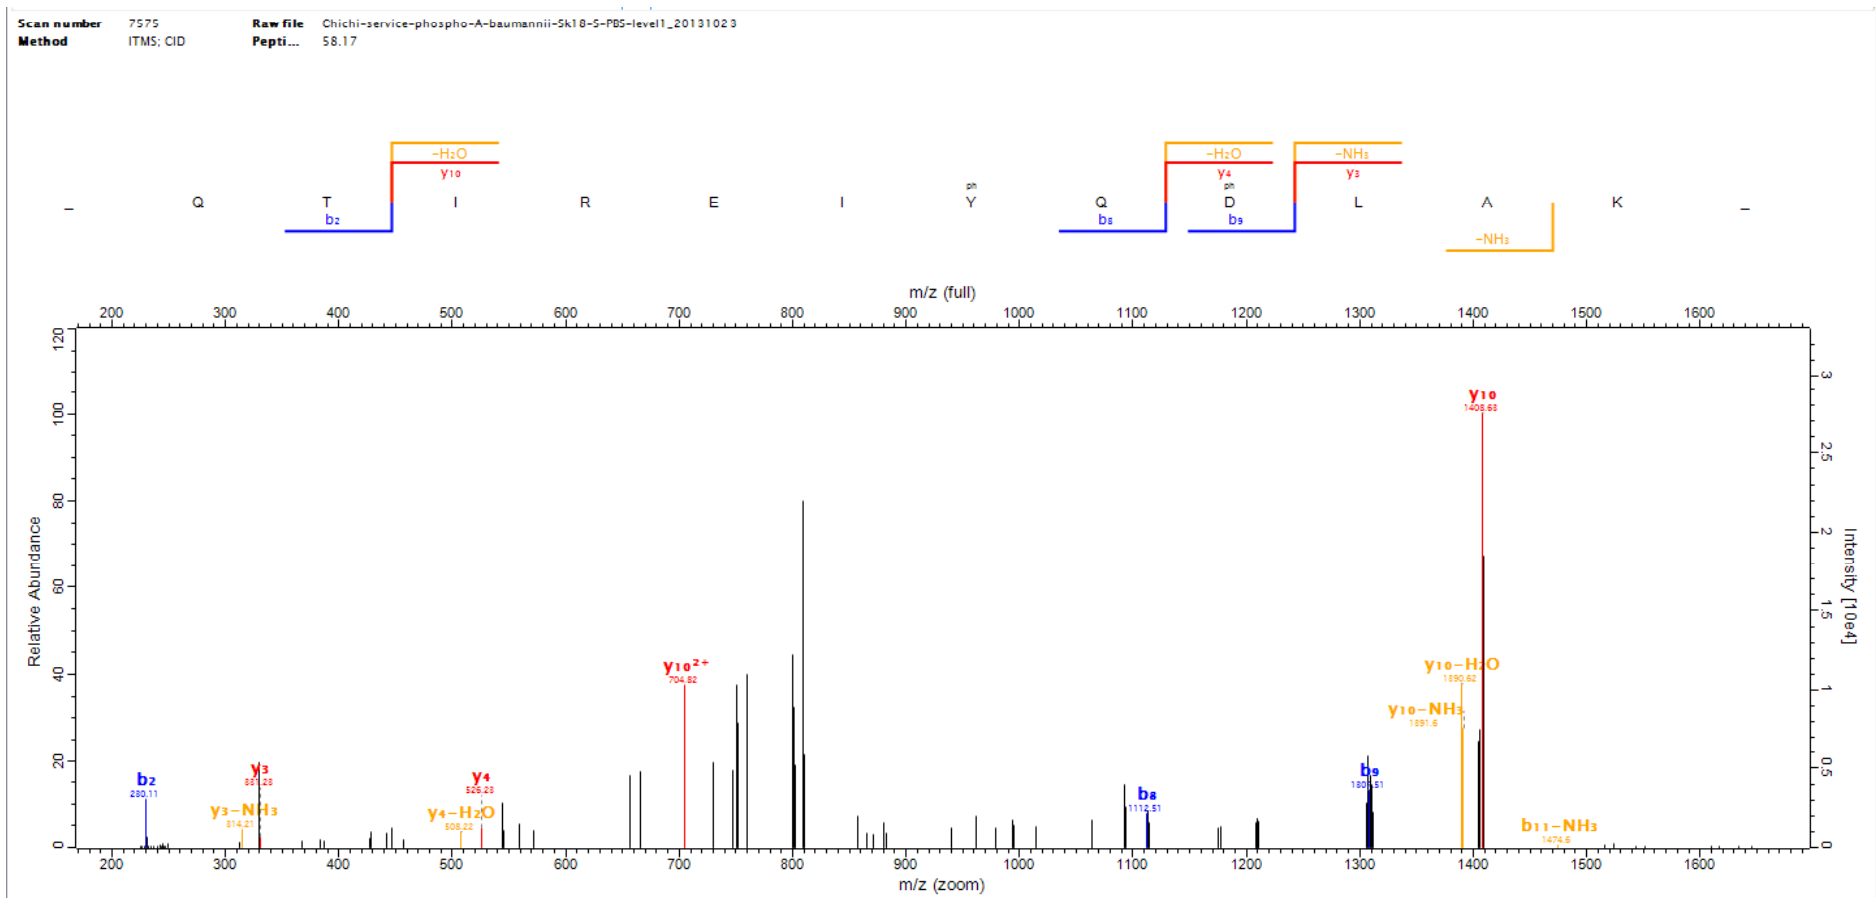

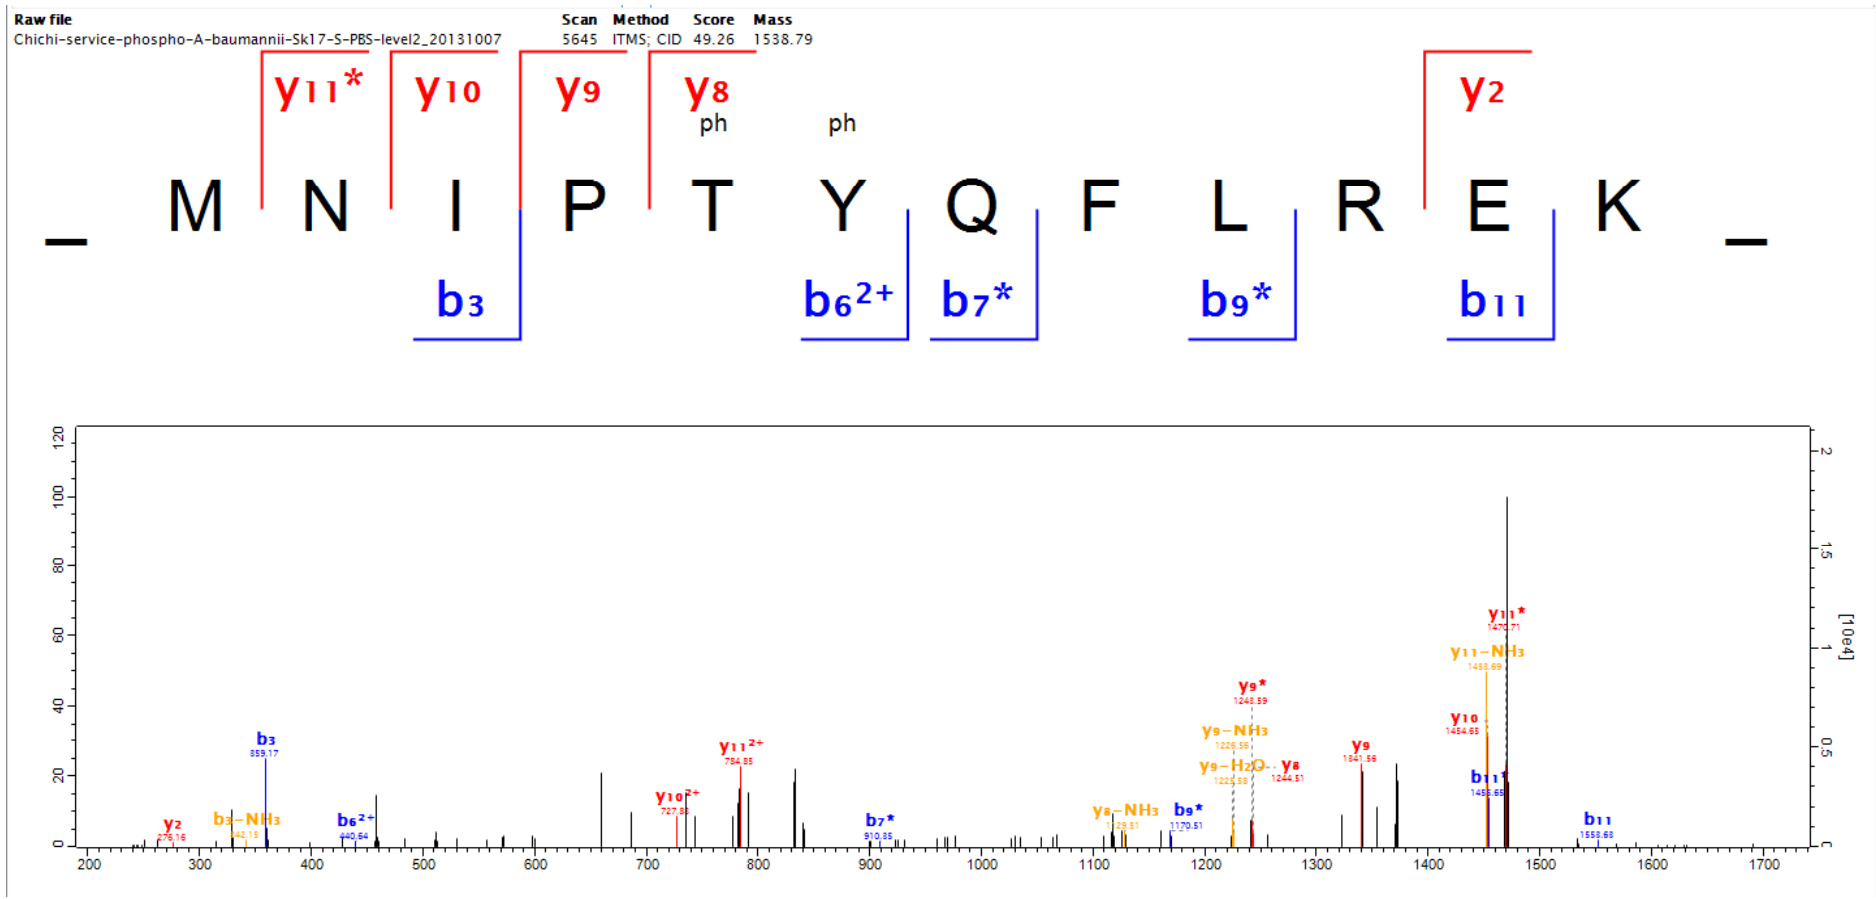

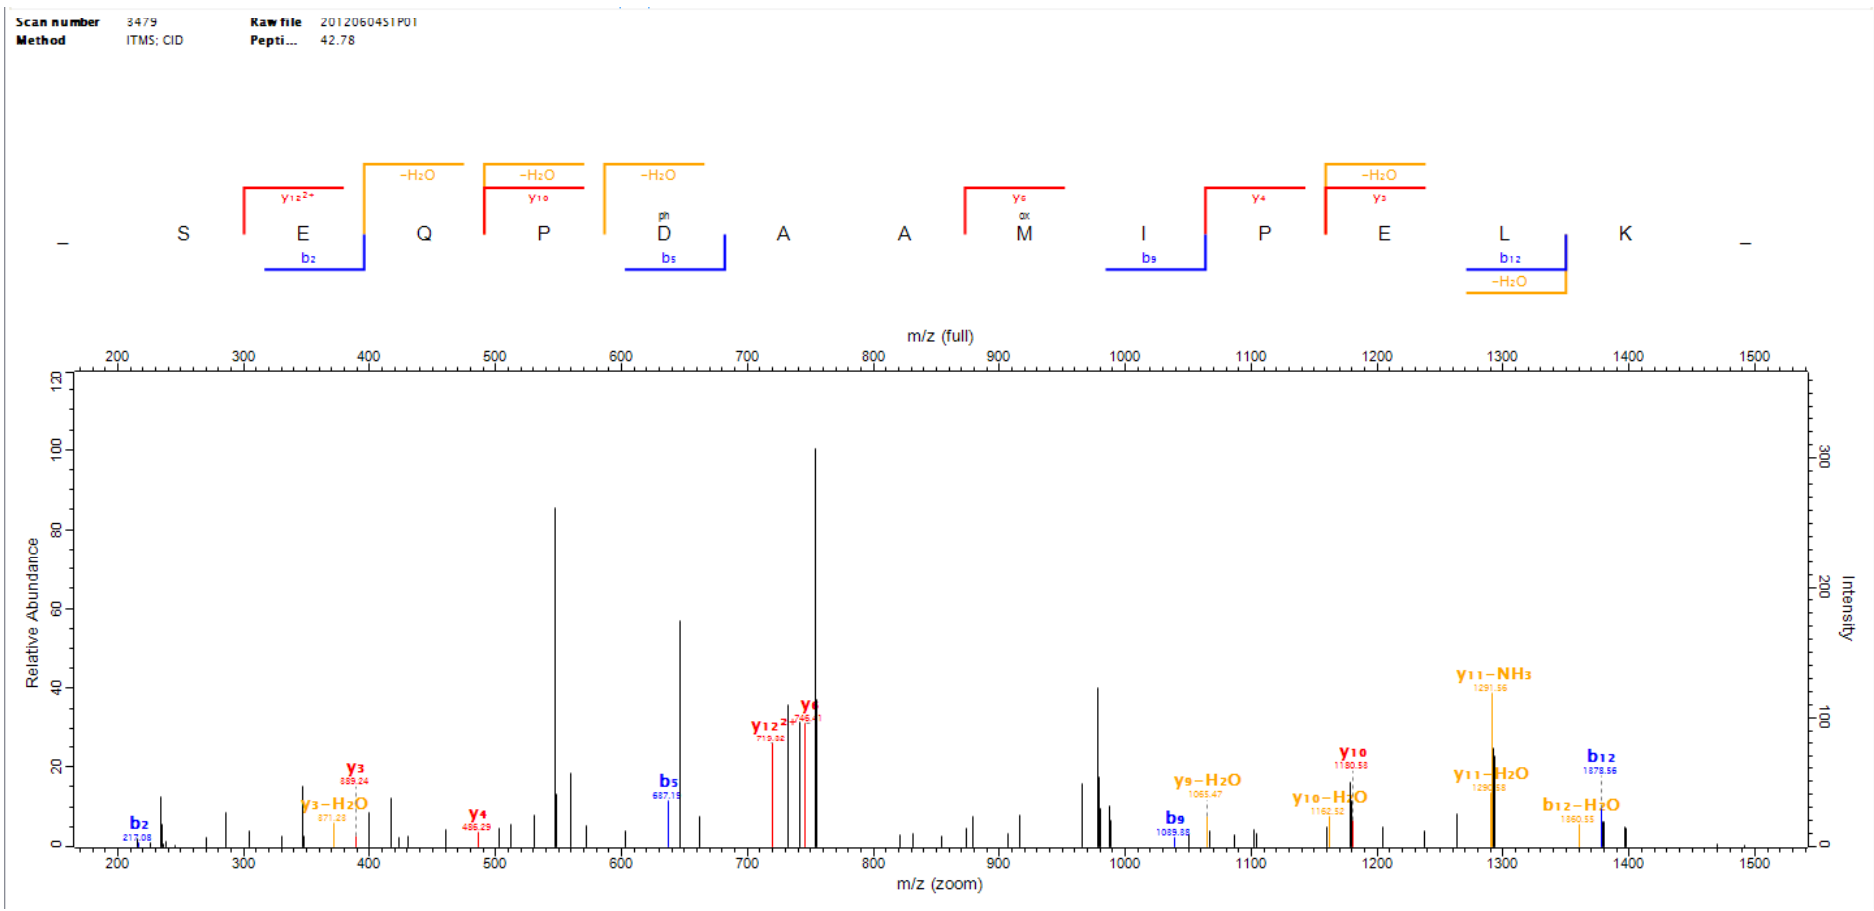

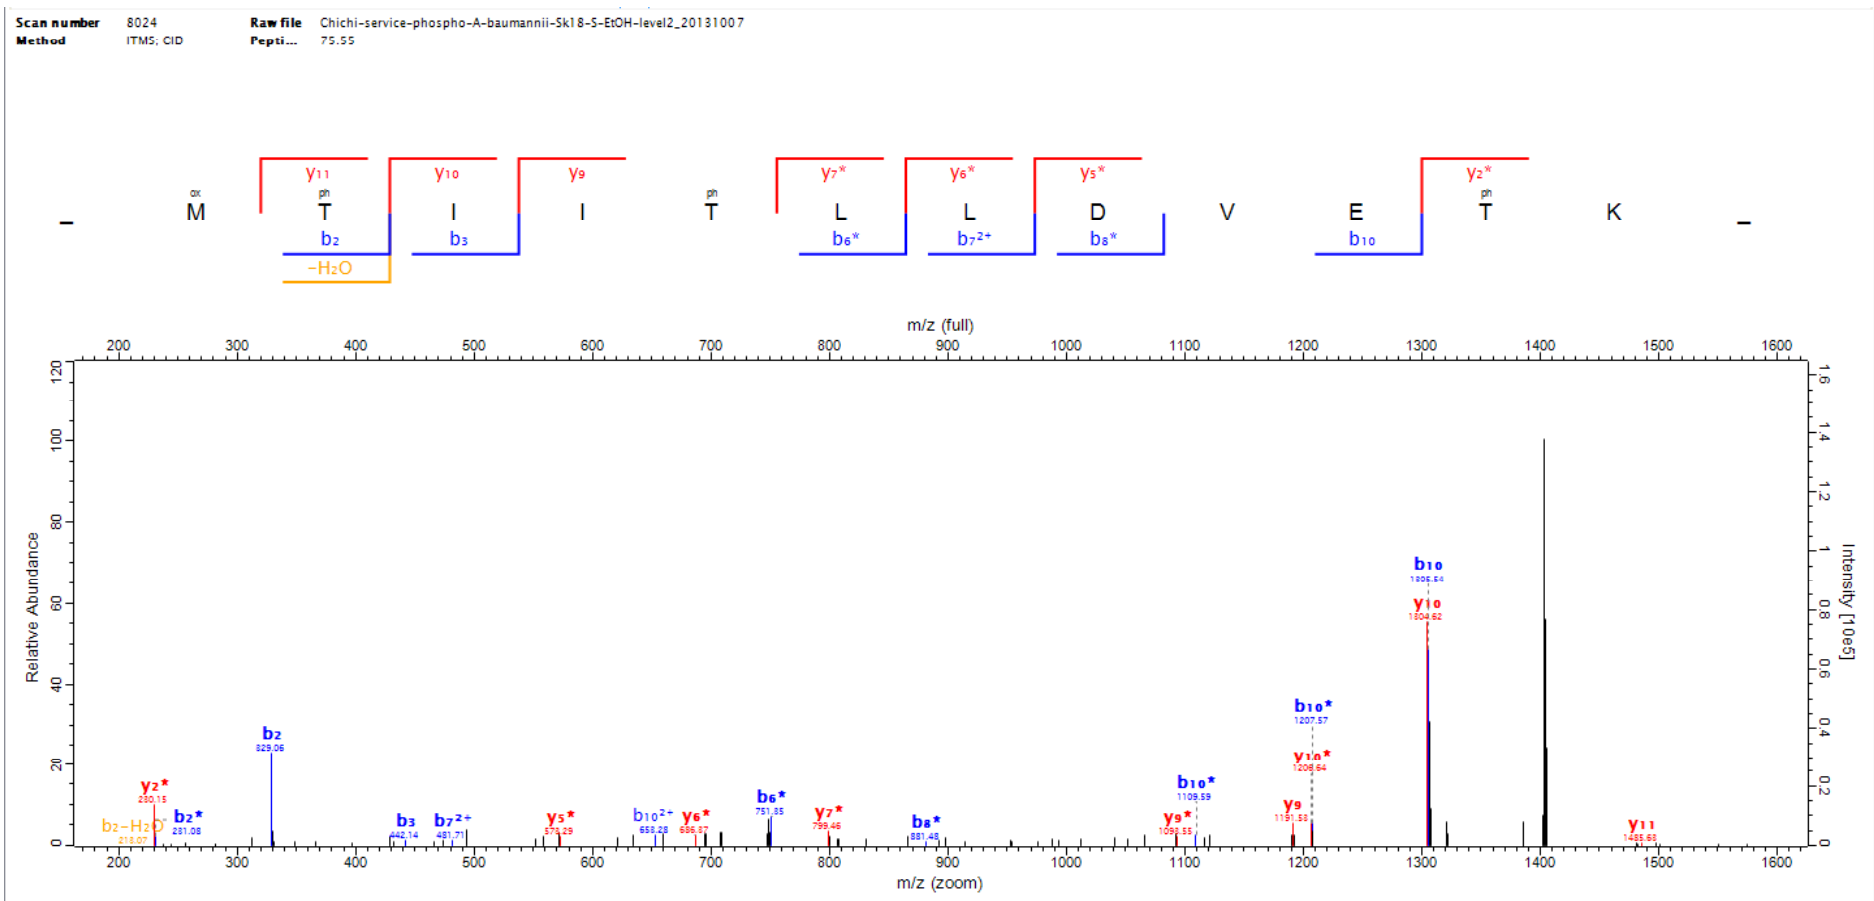

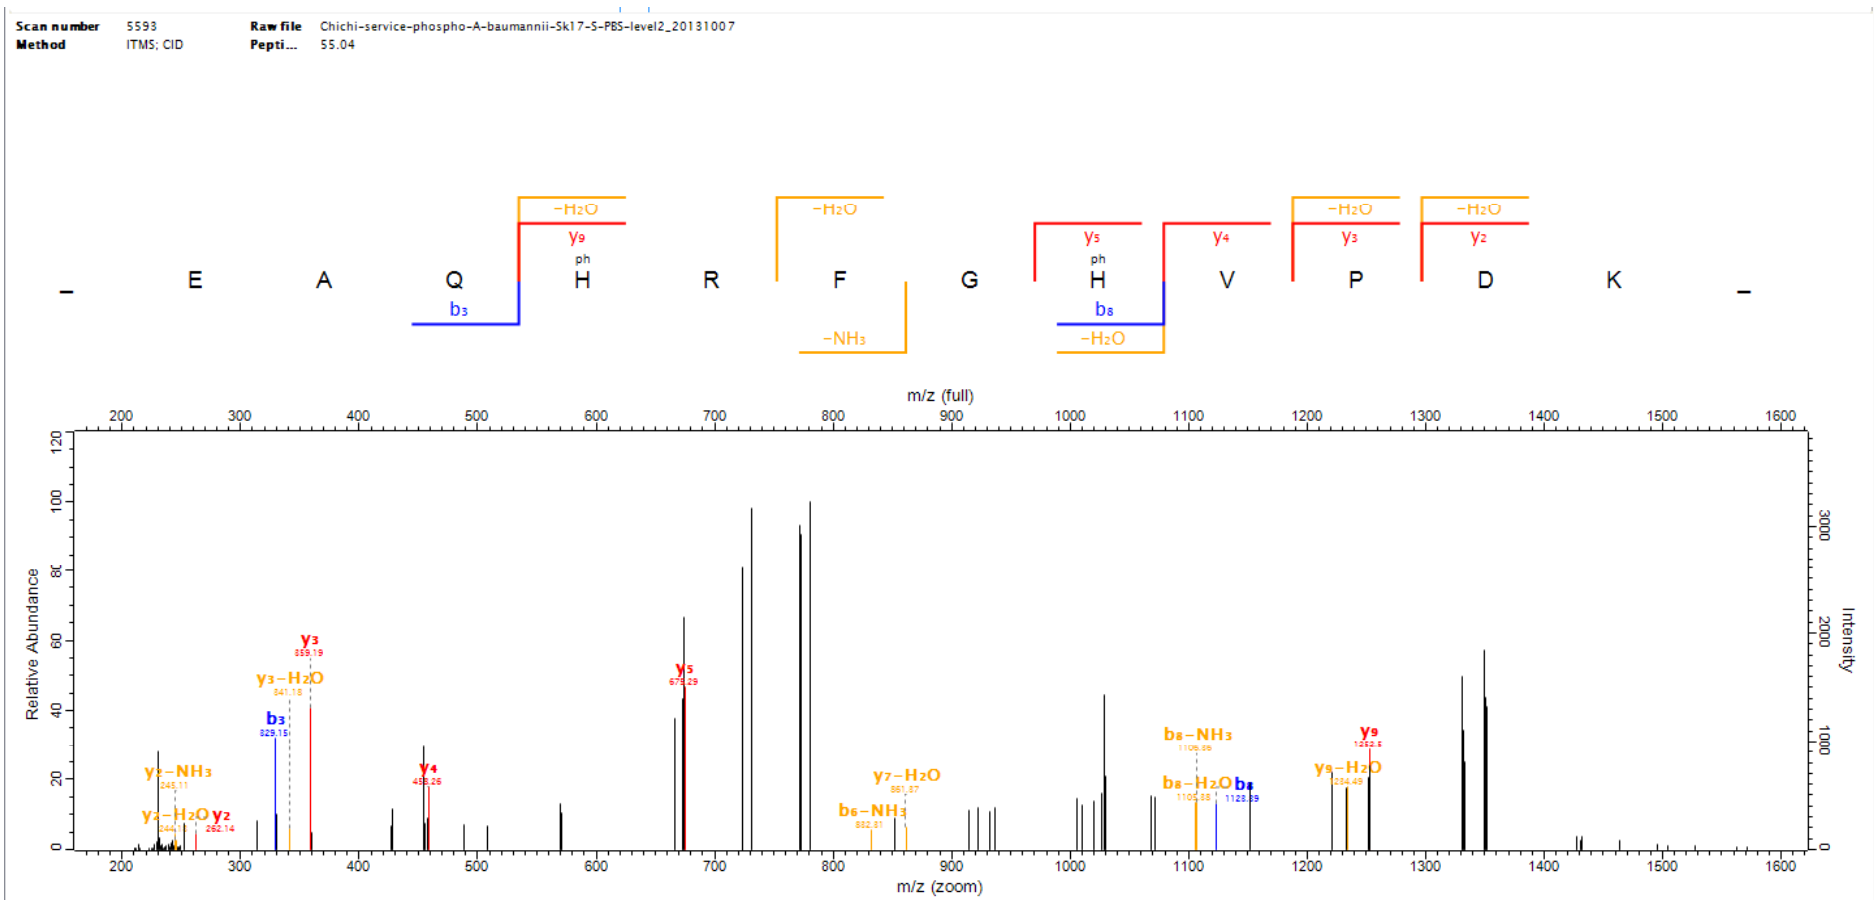



204

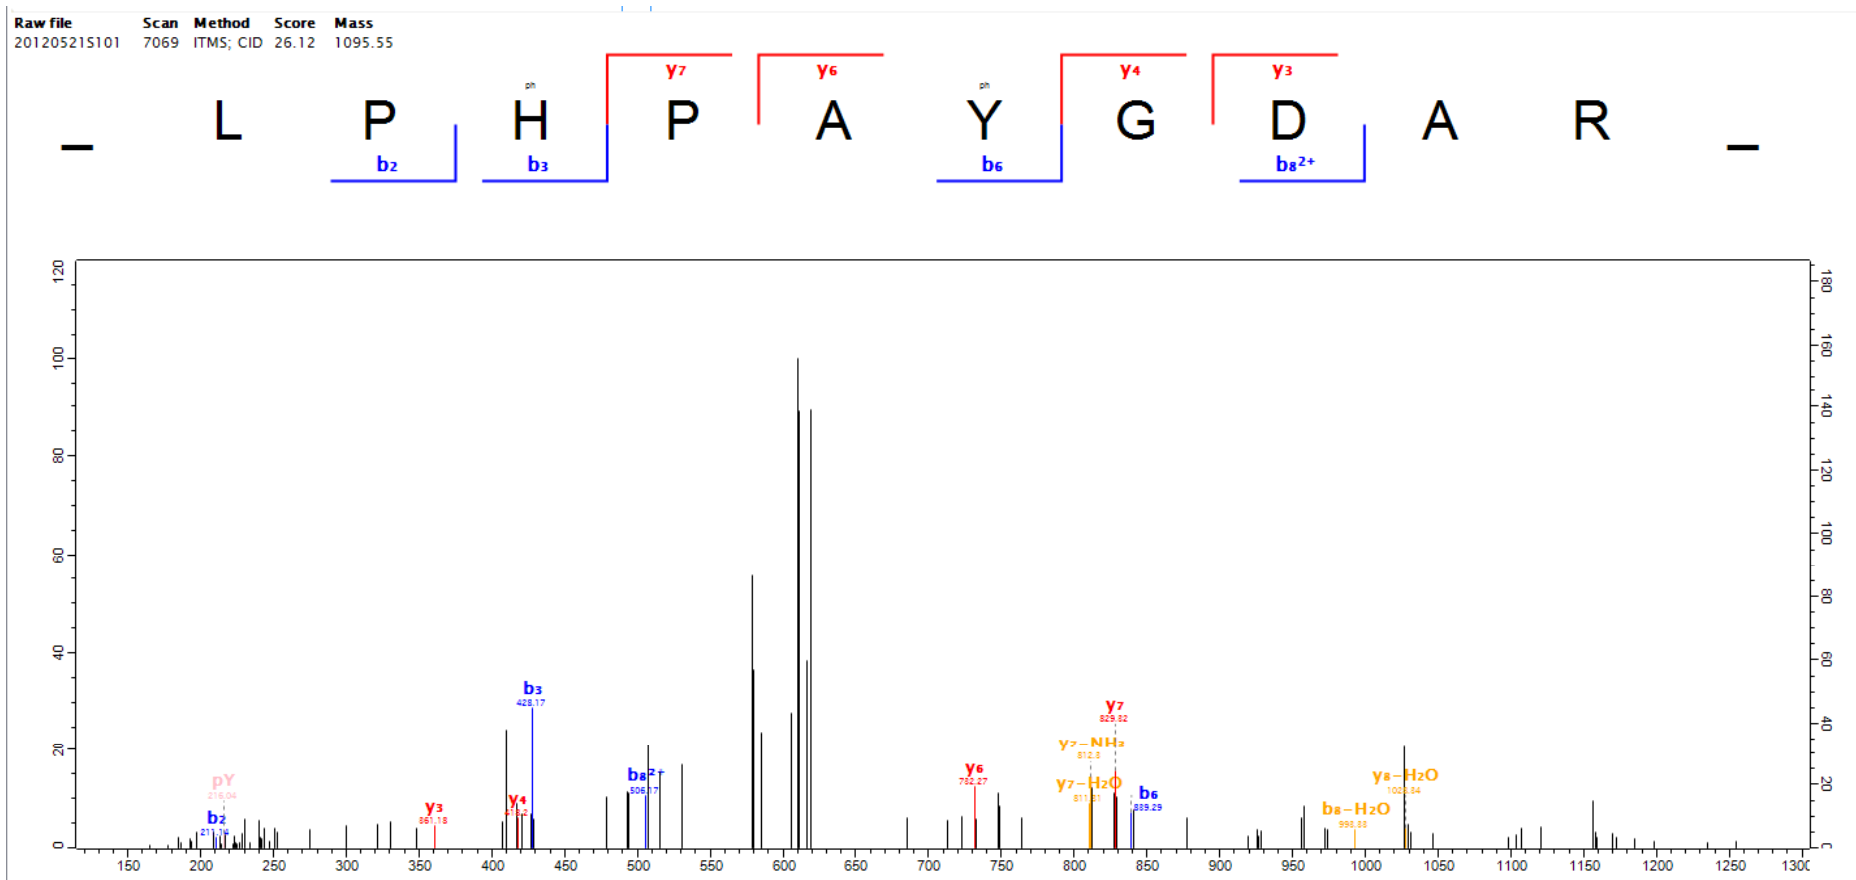

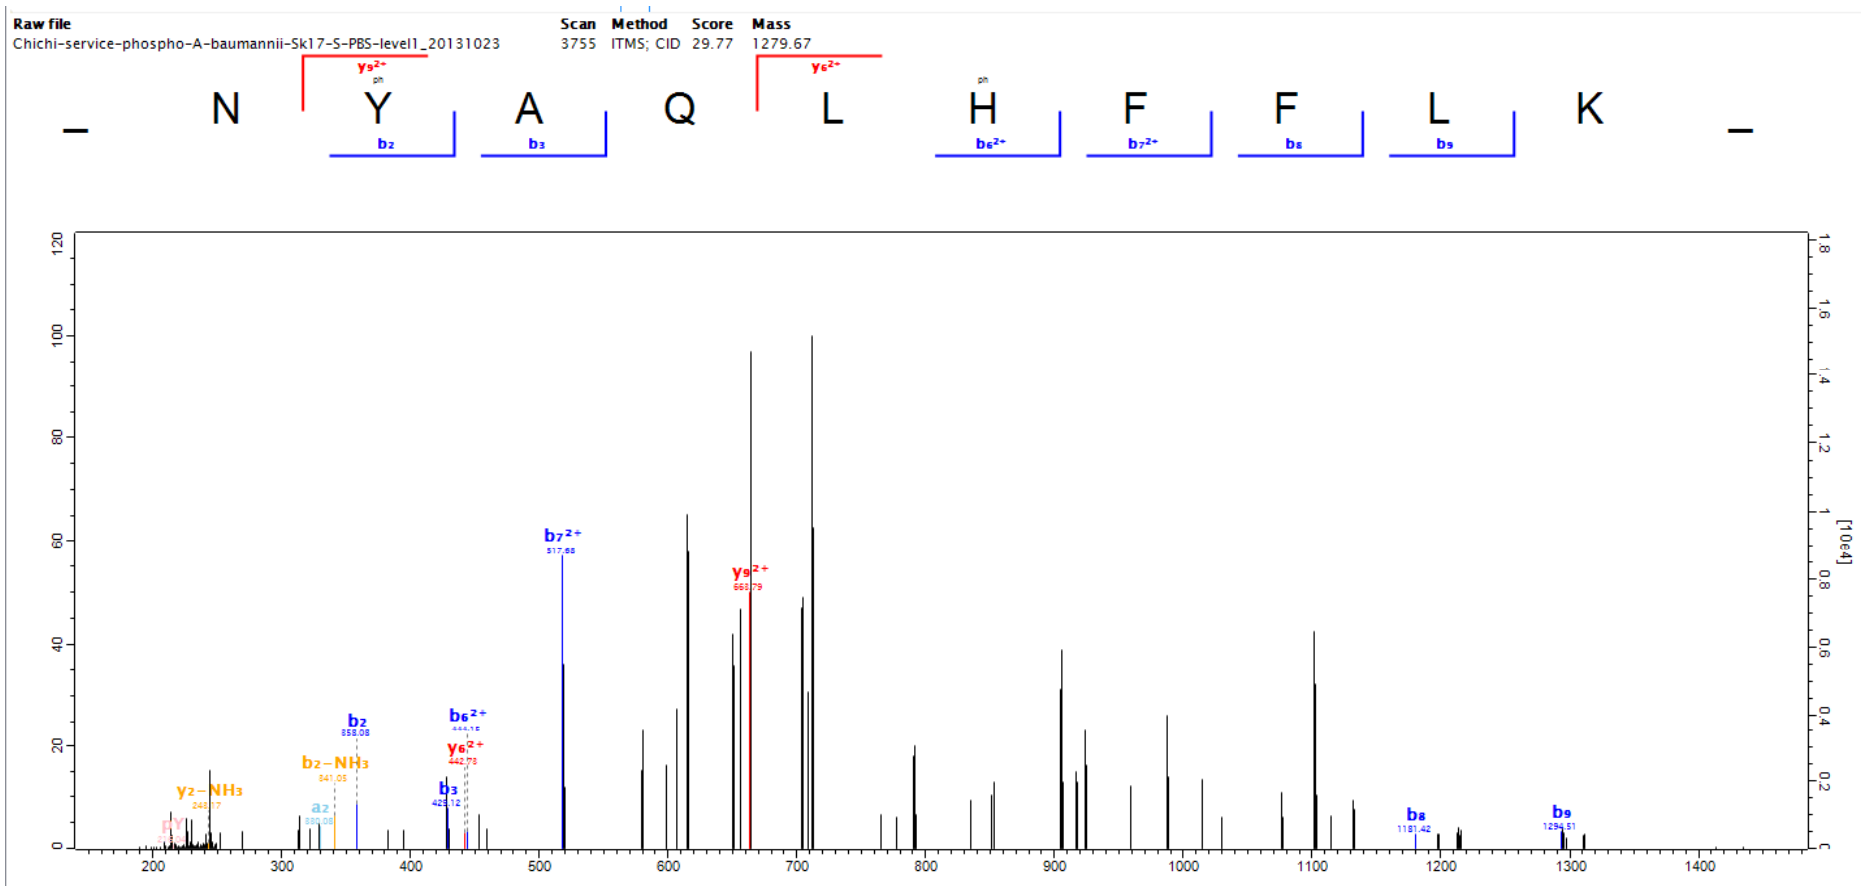

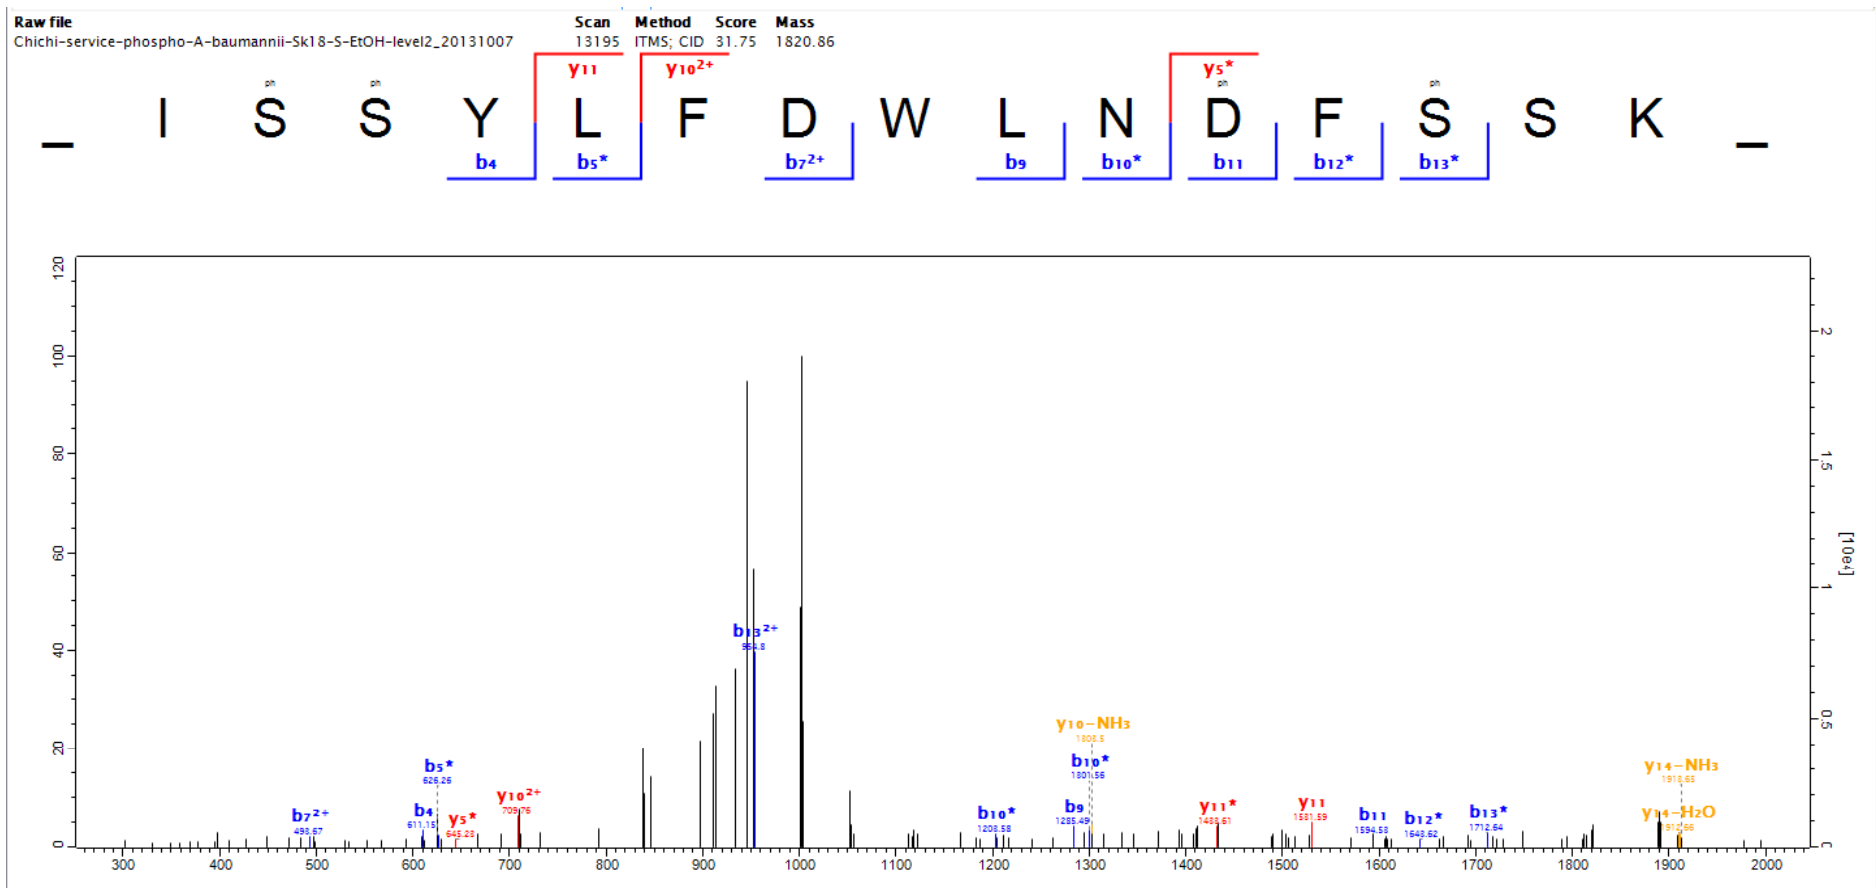

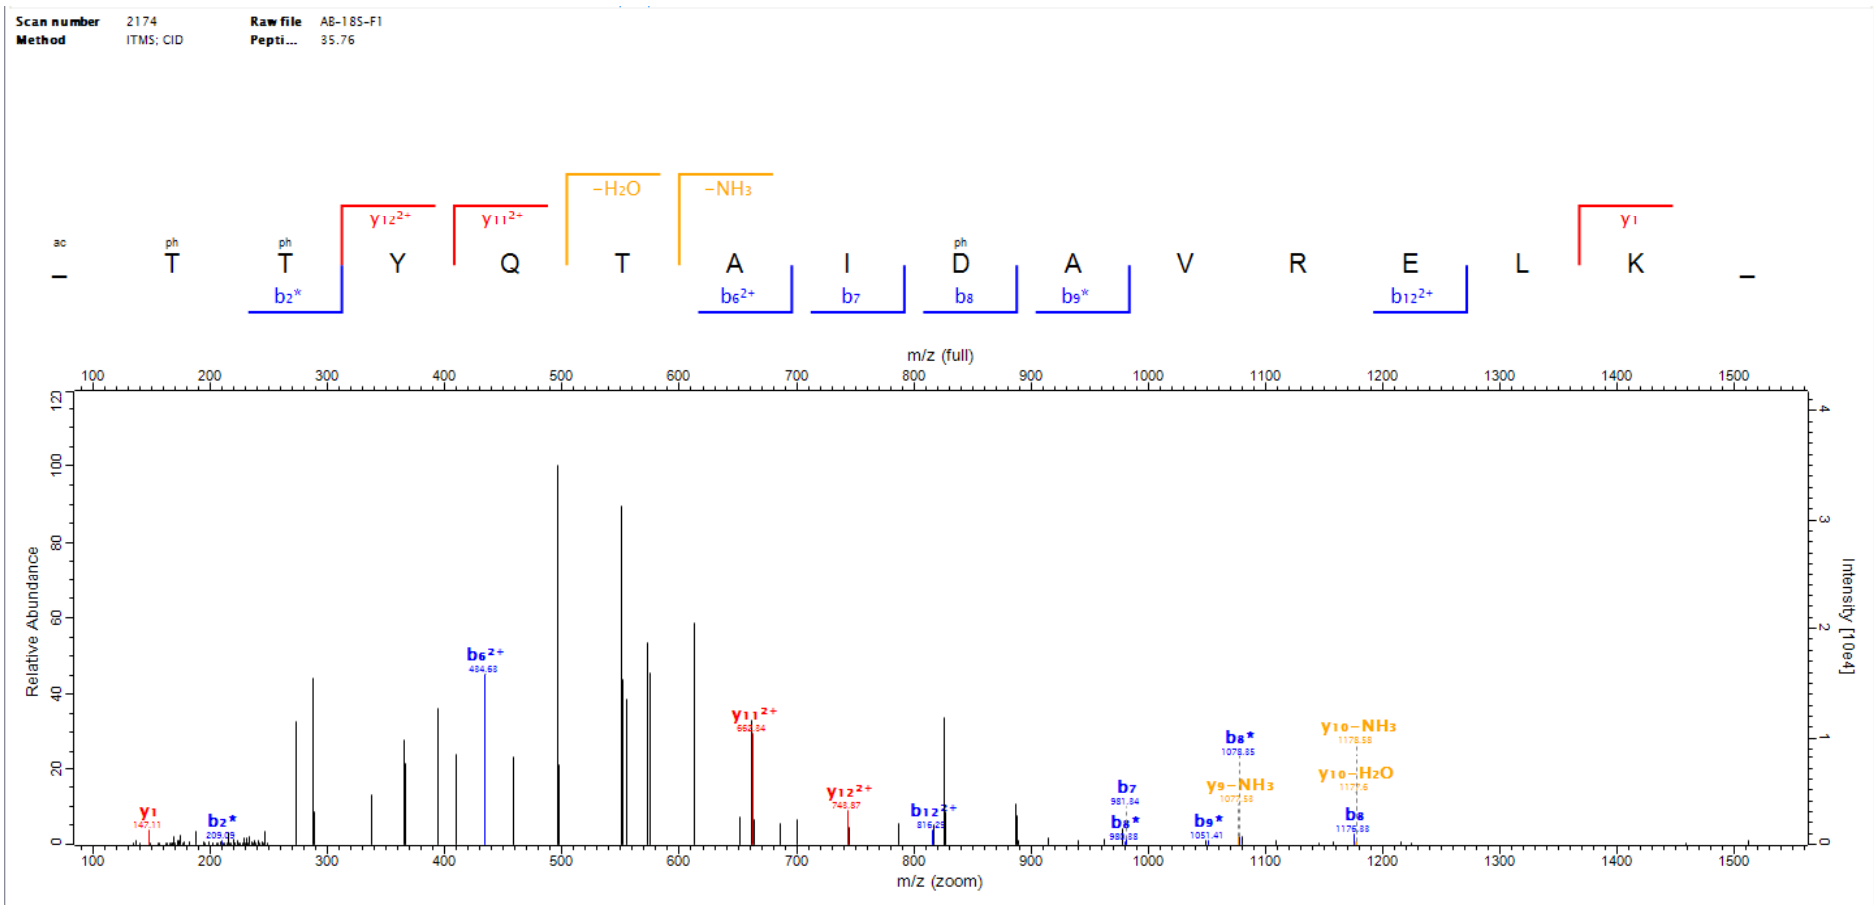

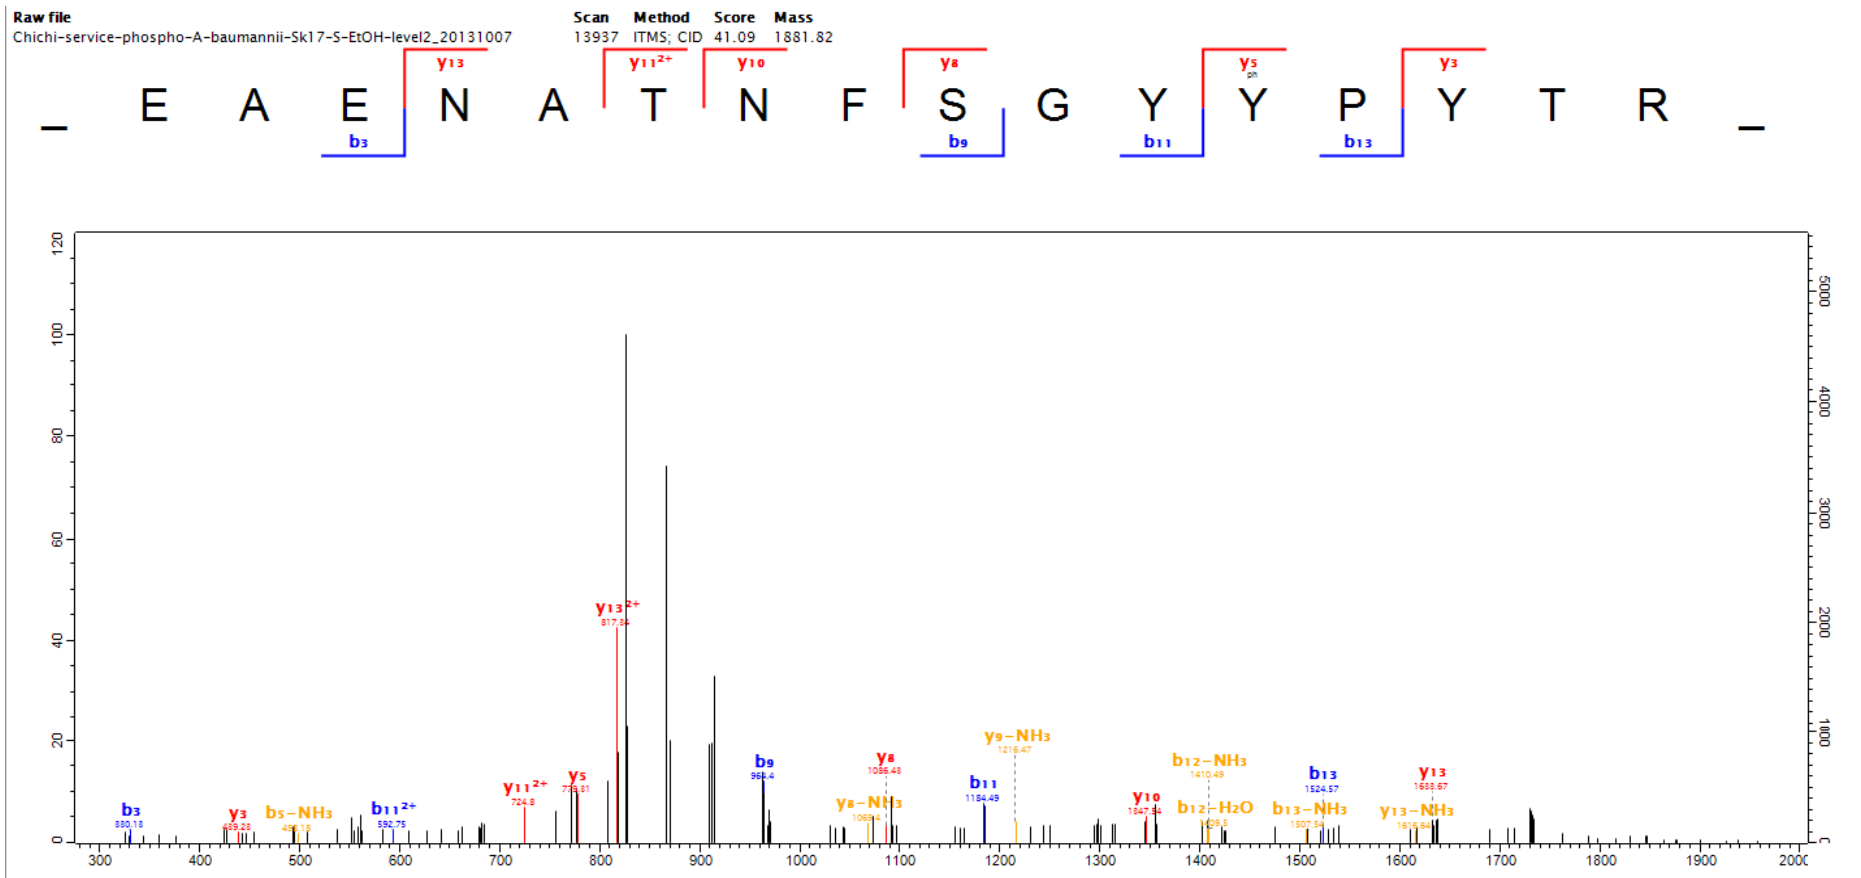

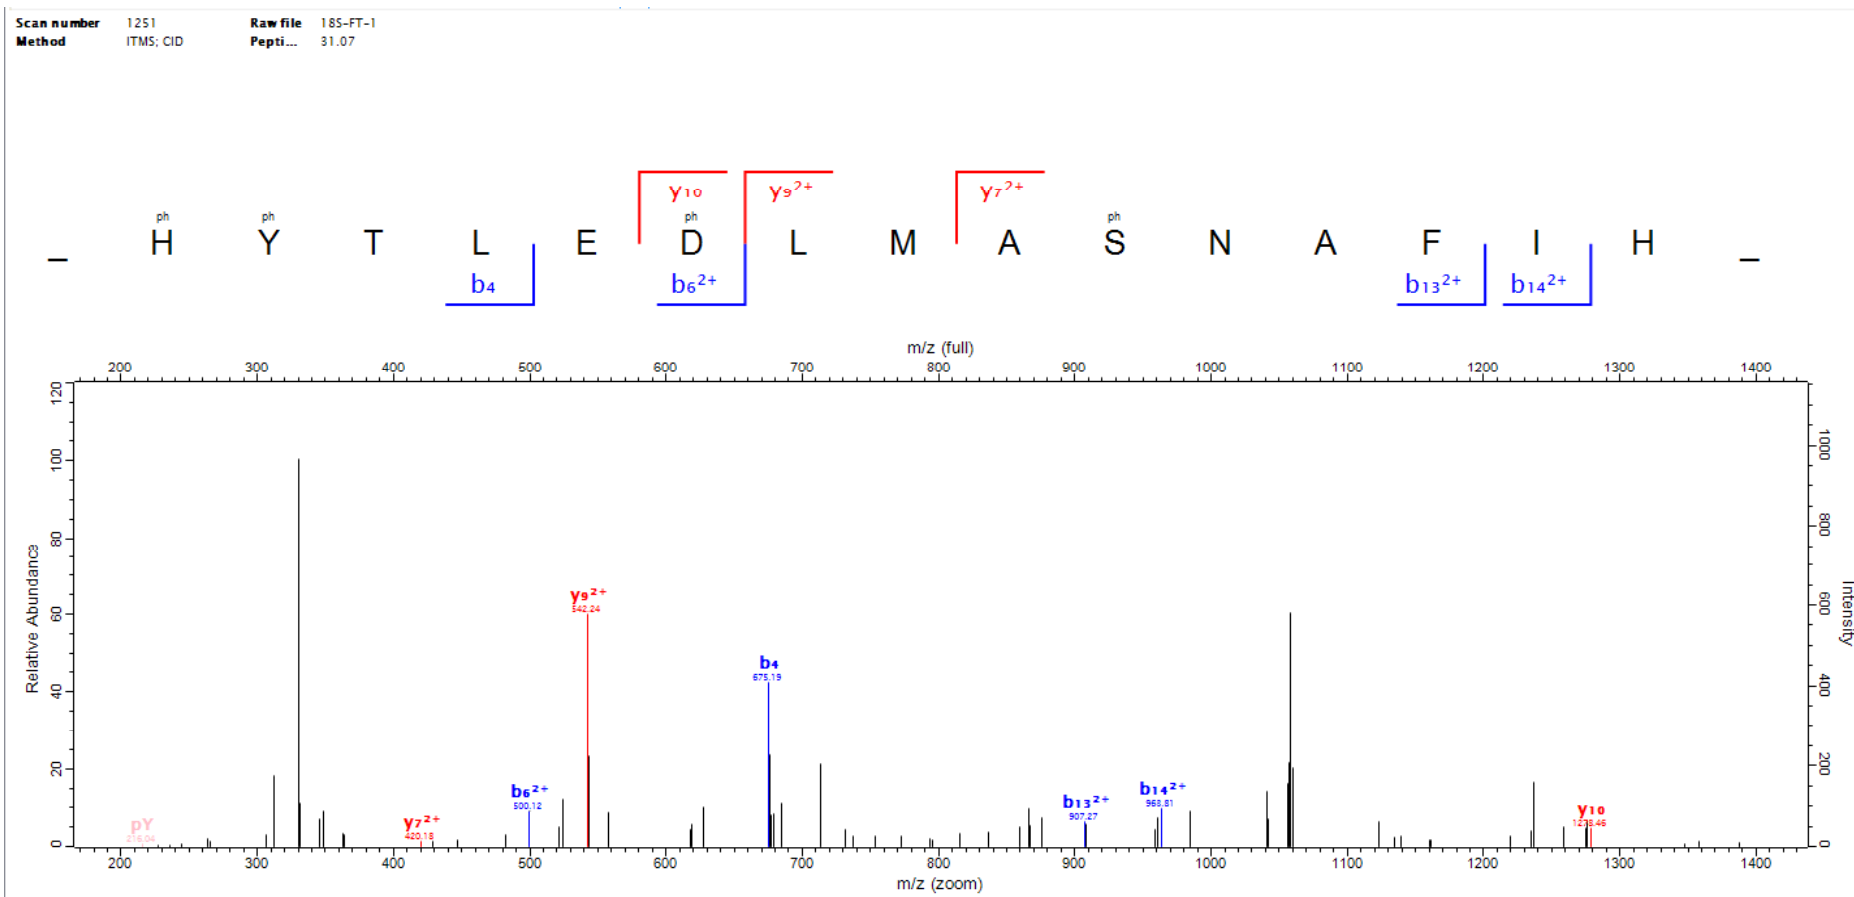

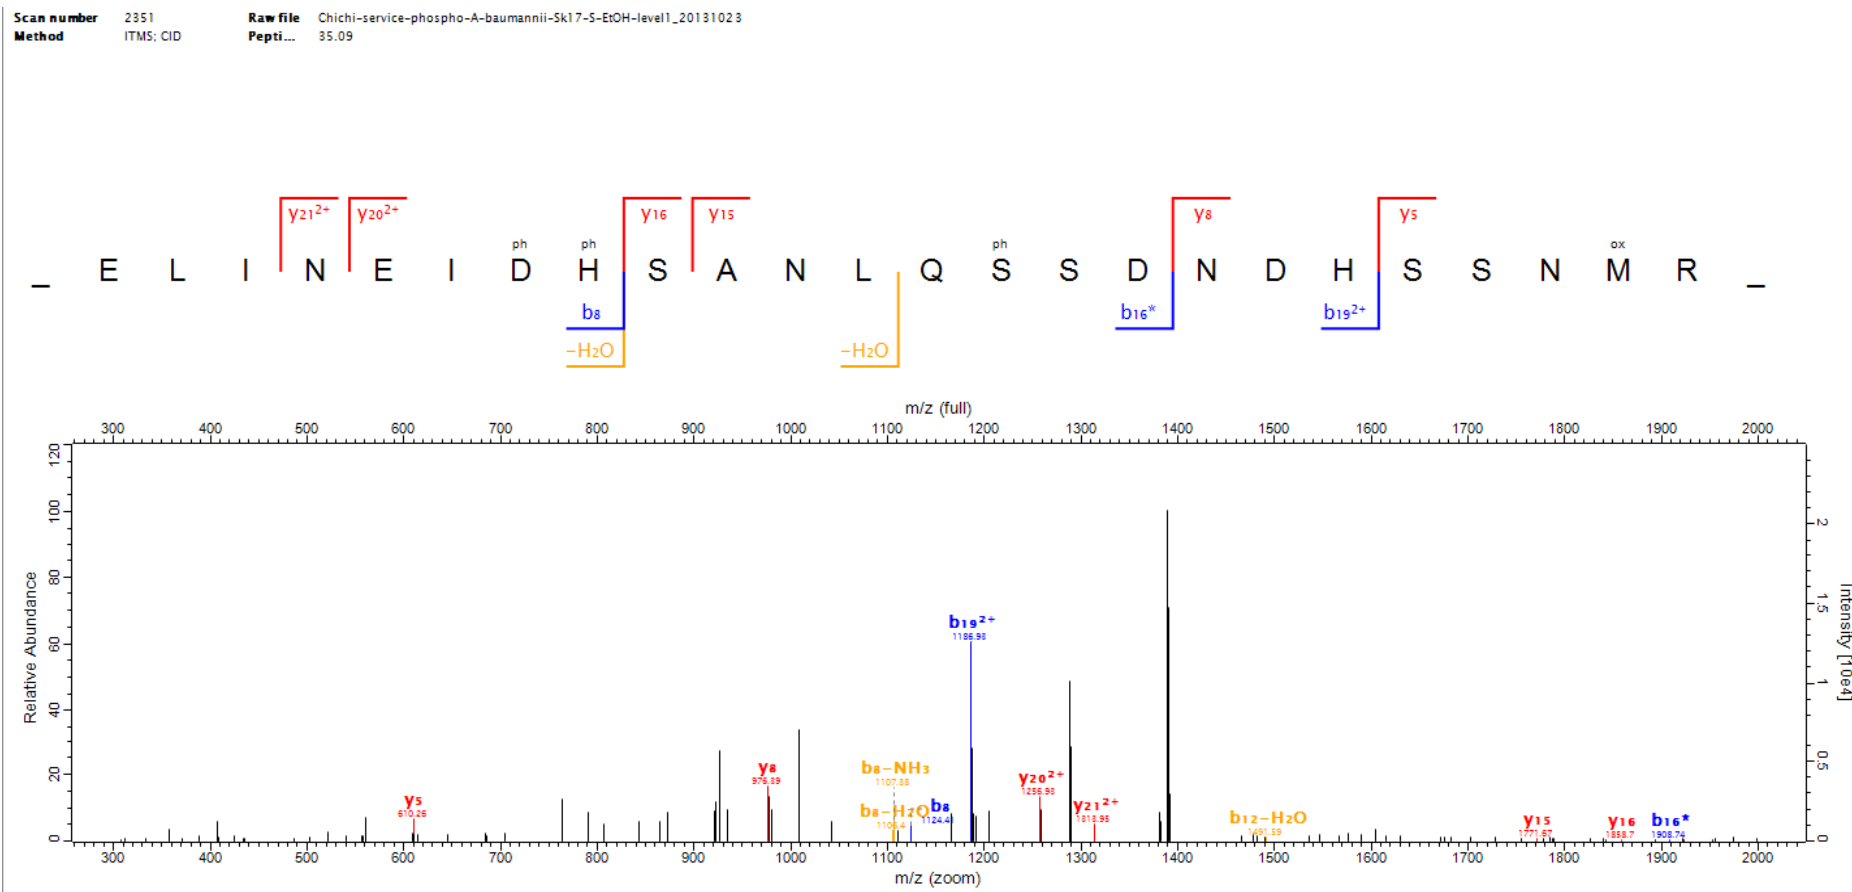

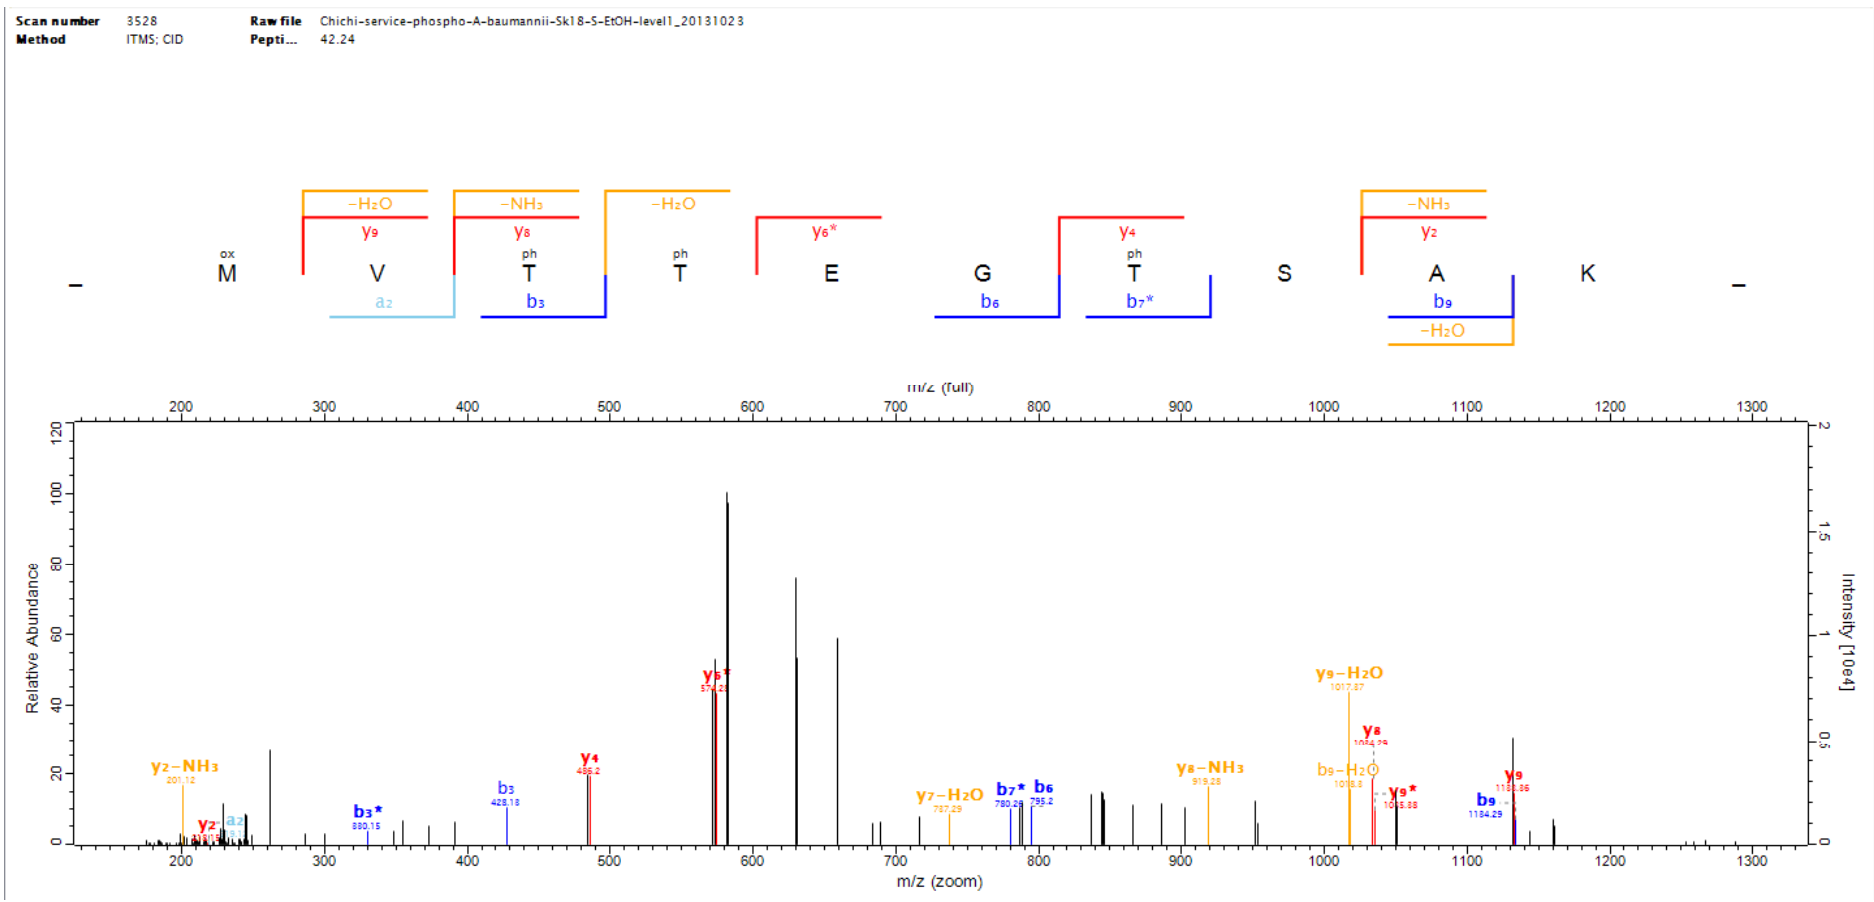



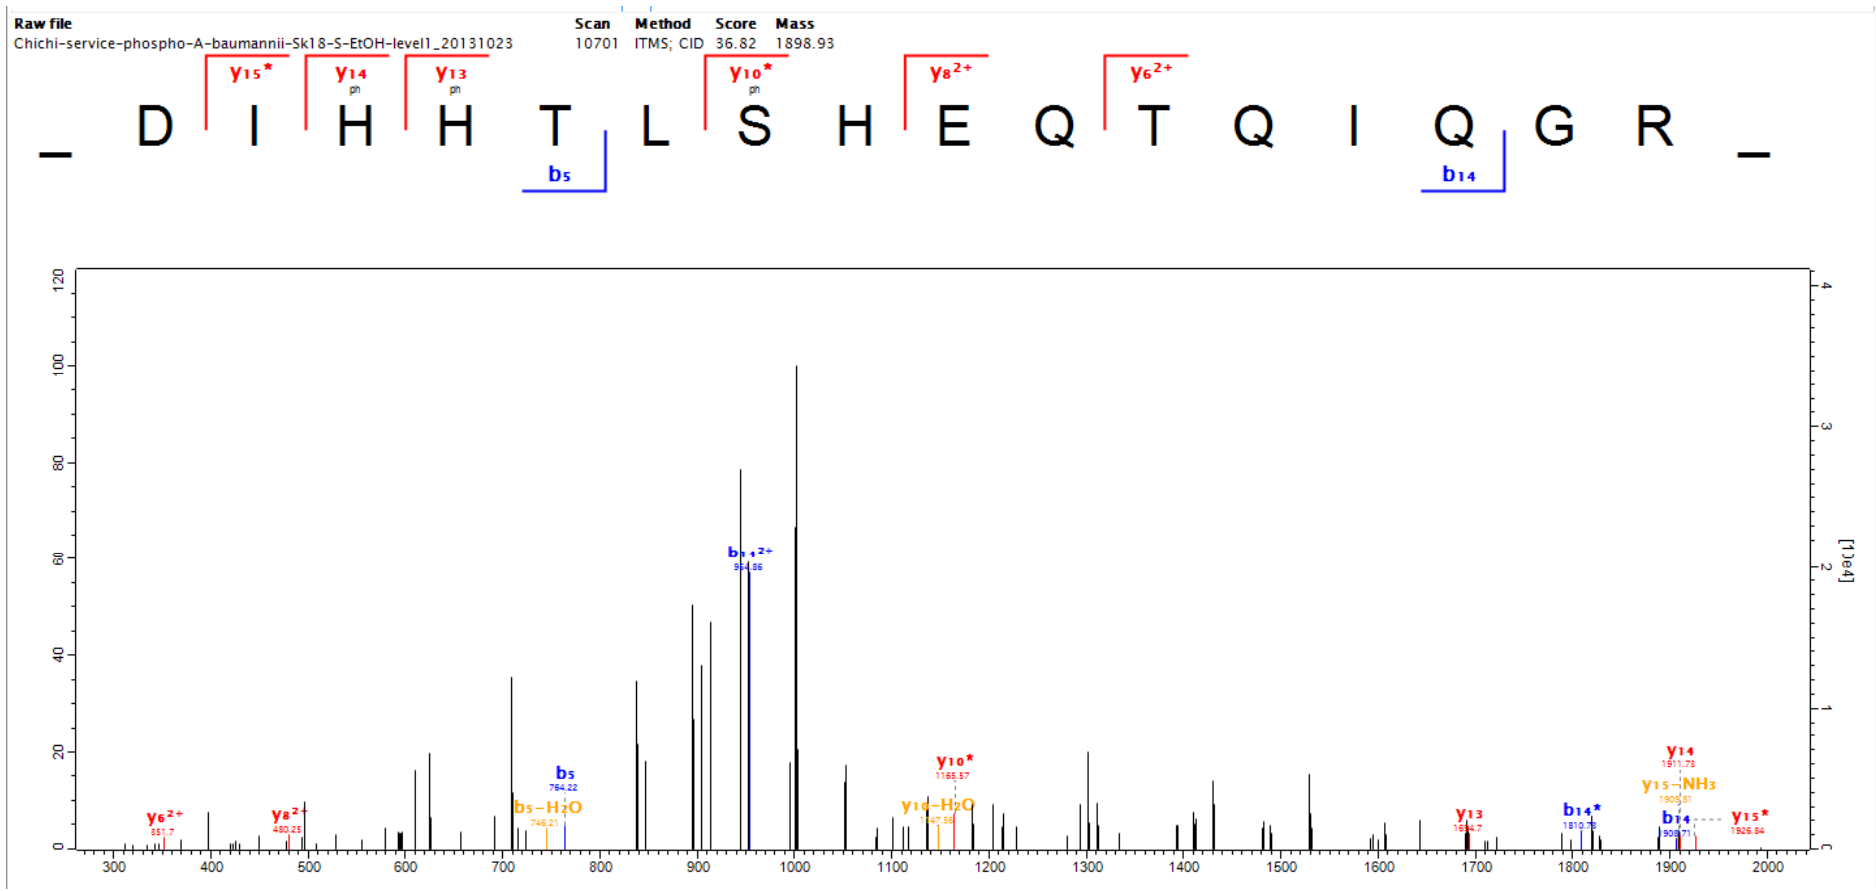

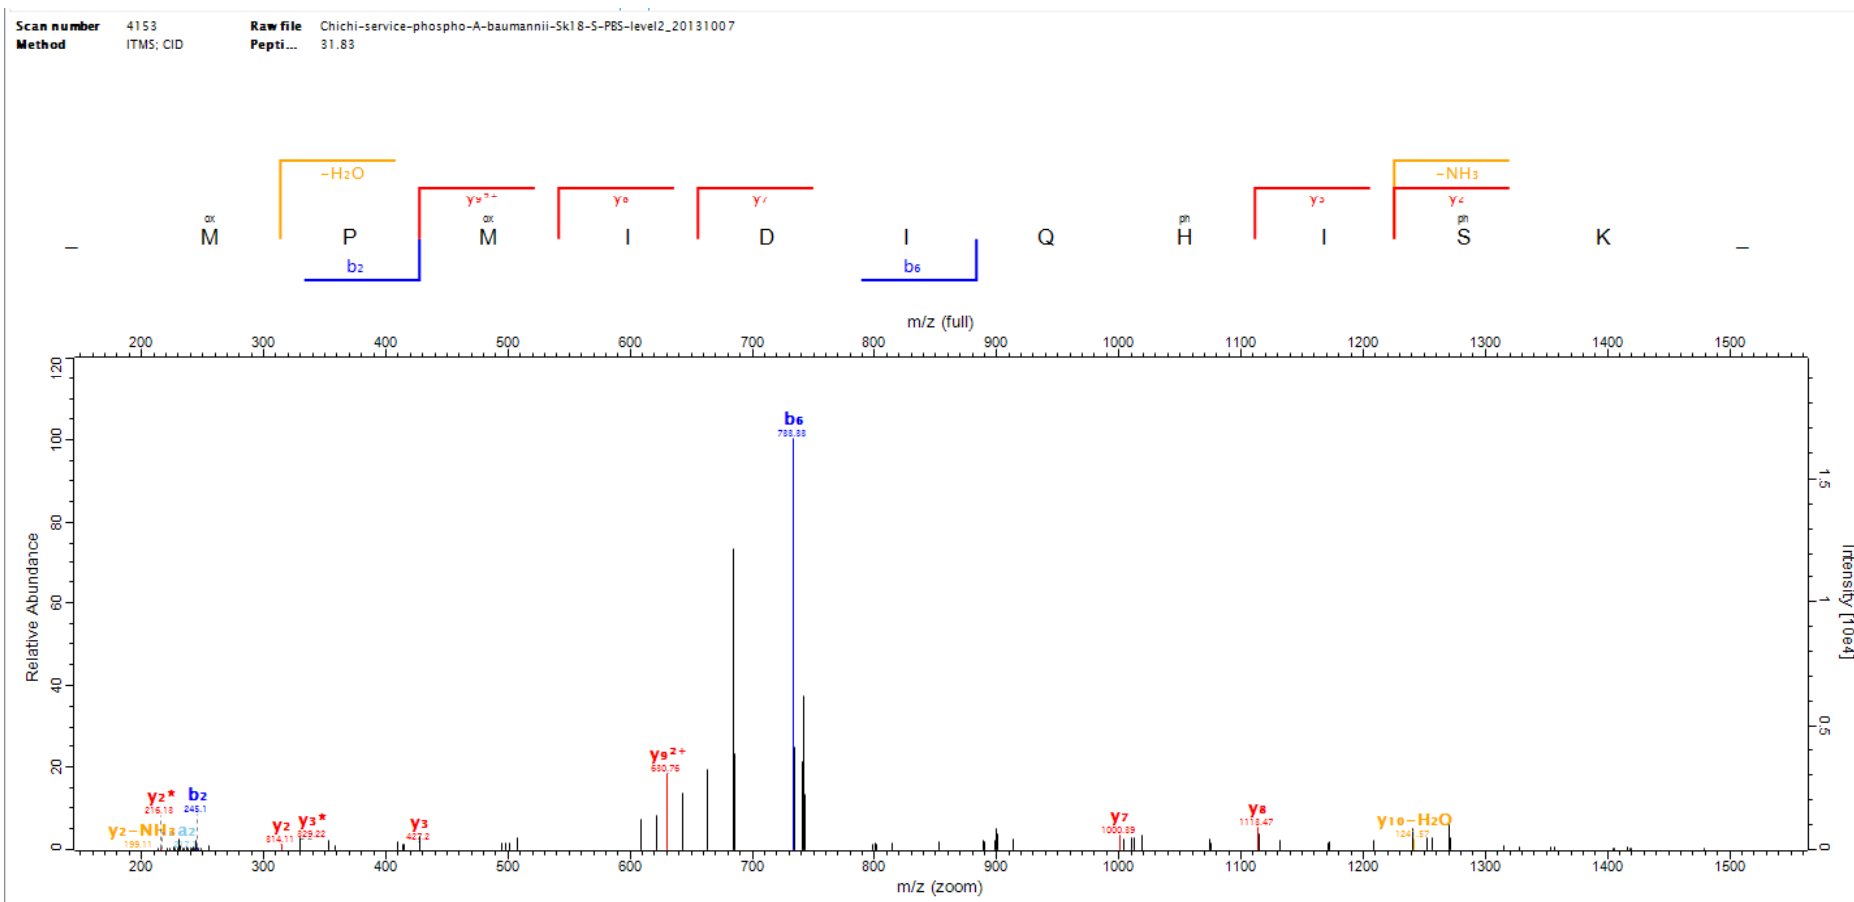

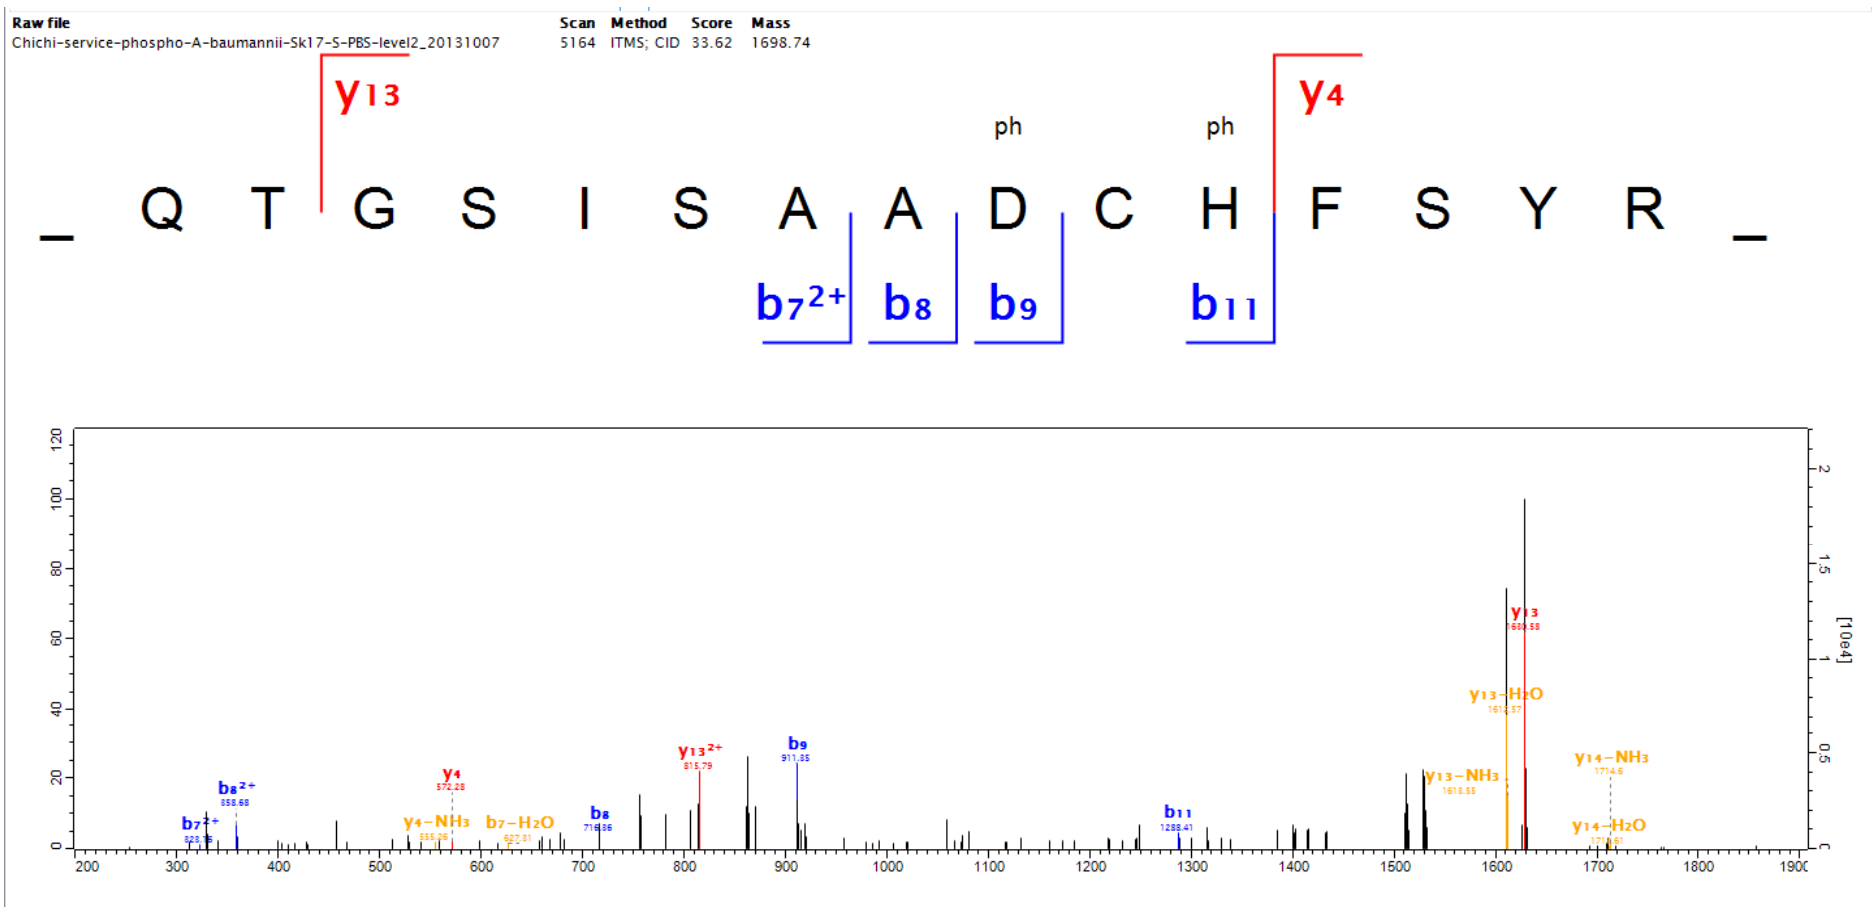

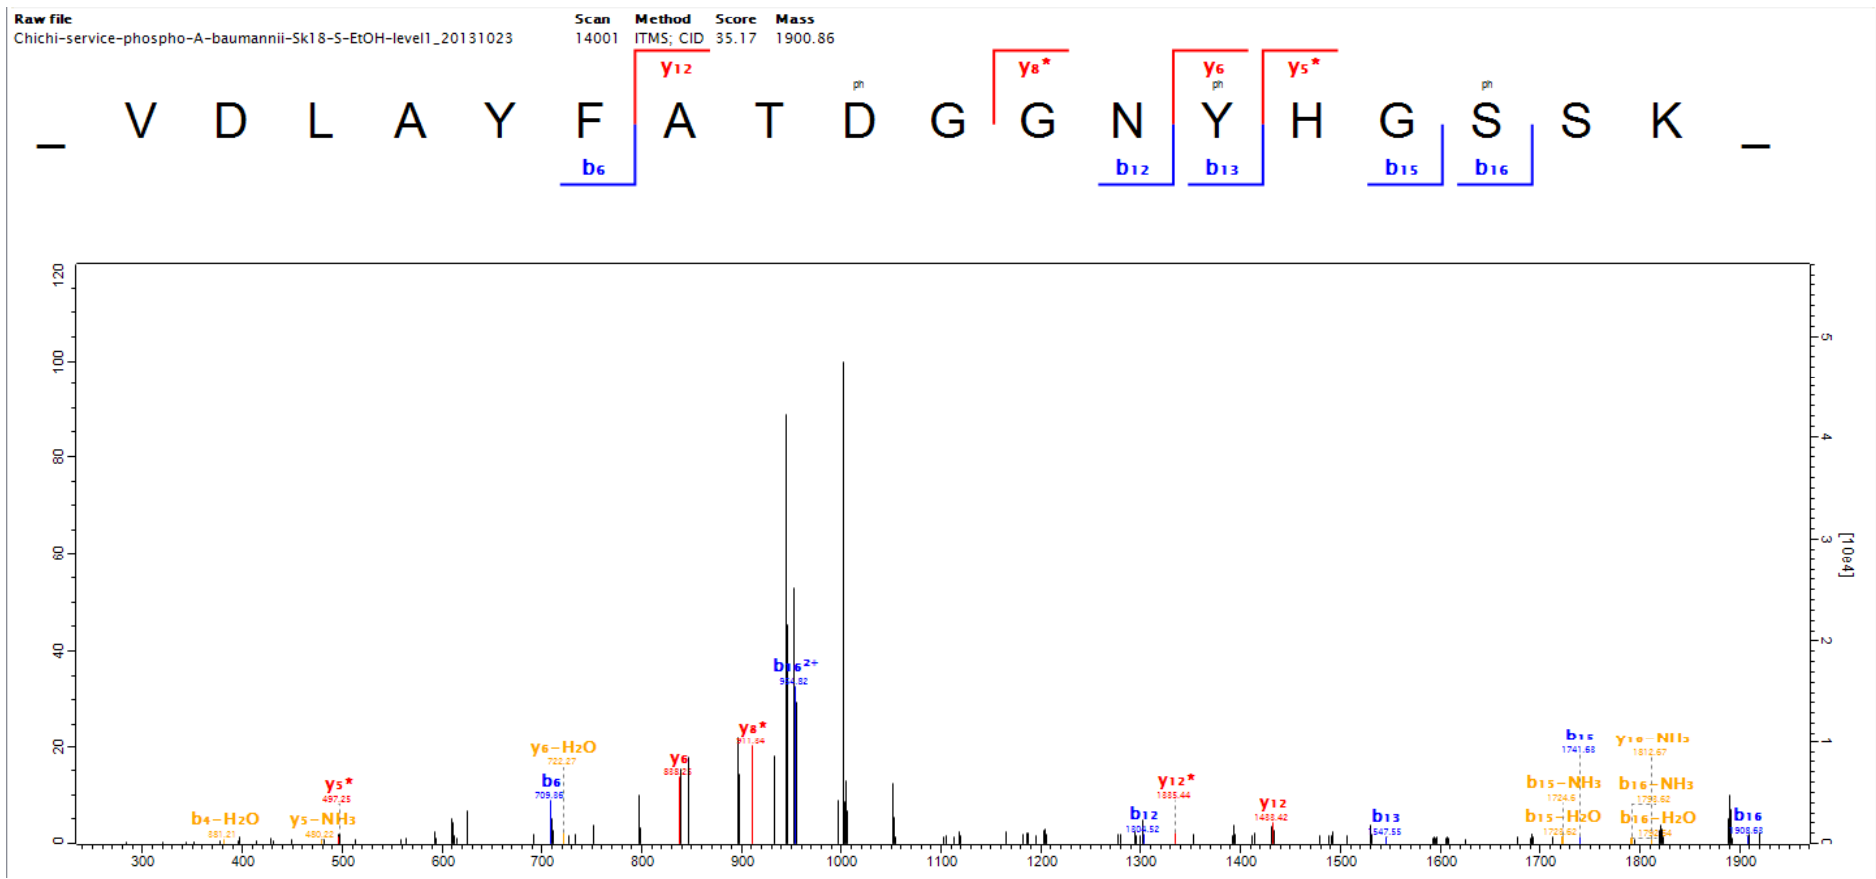

Scan number 15513 Raw file Chichi-service-phospho-A-baumannii-Sk17-5-PBS-level2\_20131007  
 Method ITMS: CID Pepti... 40.01

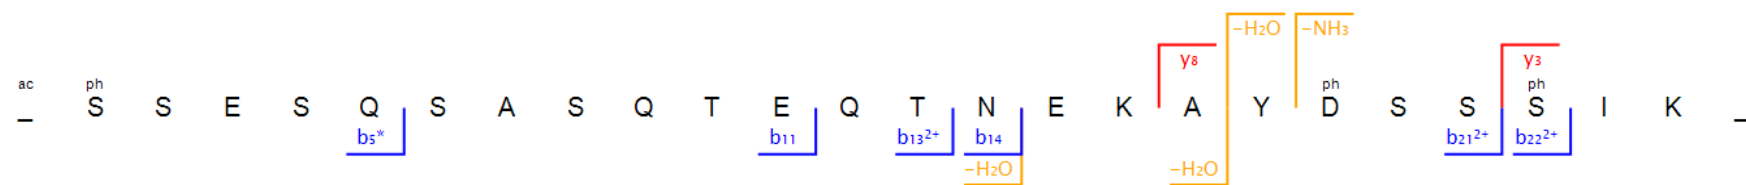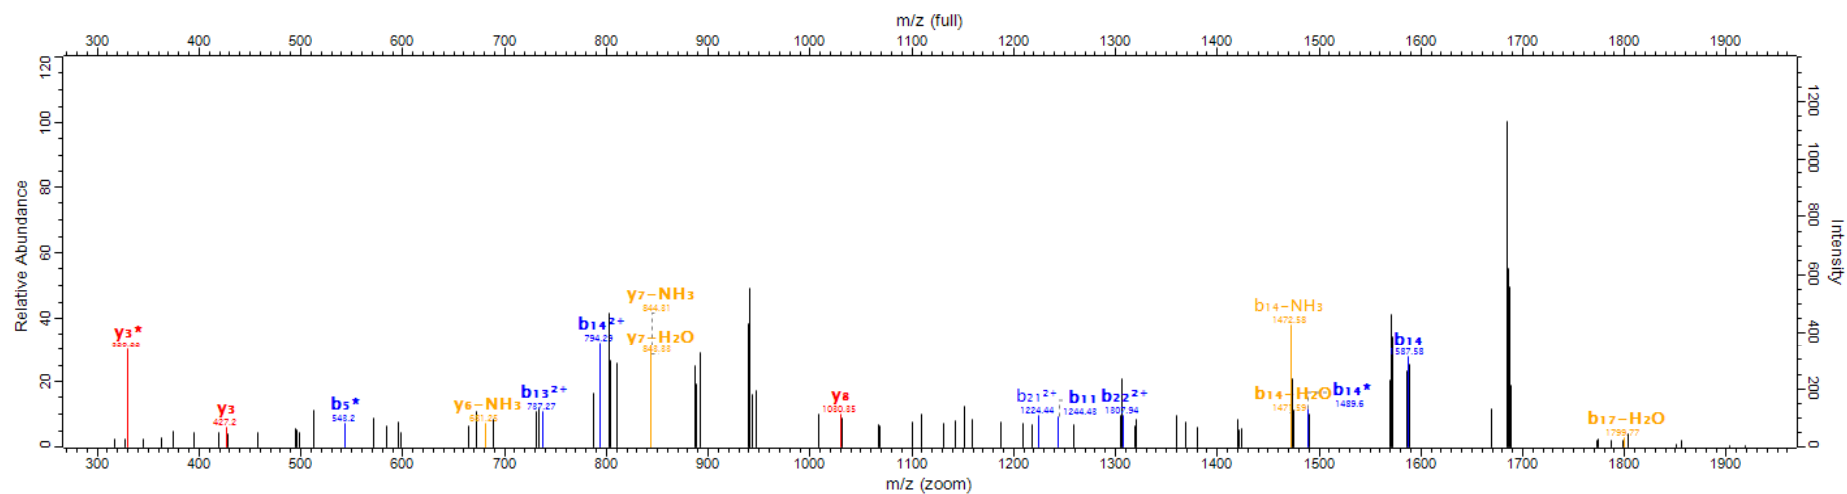

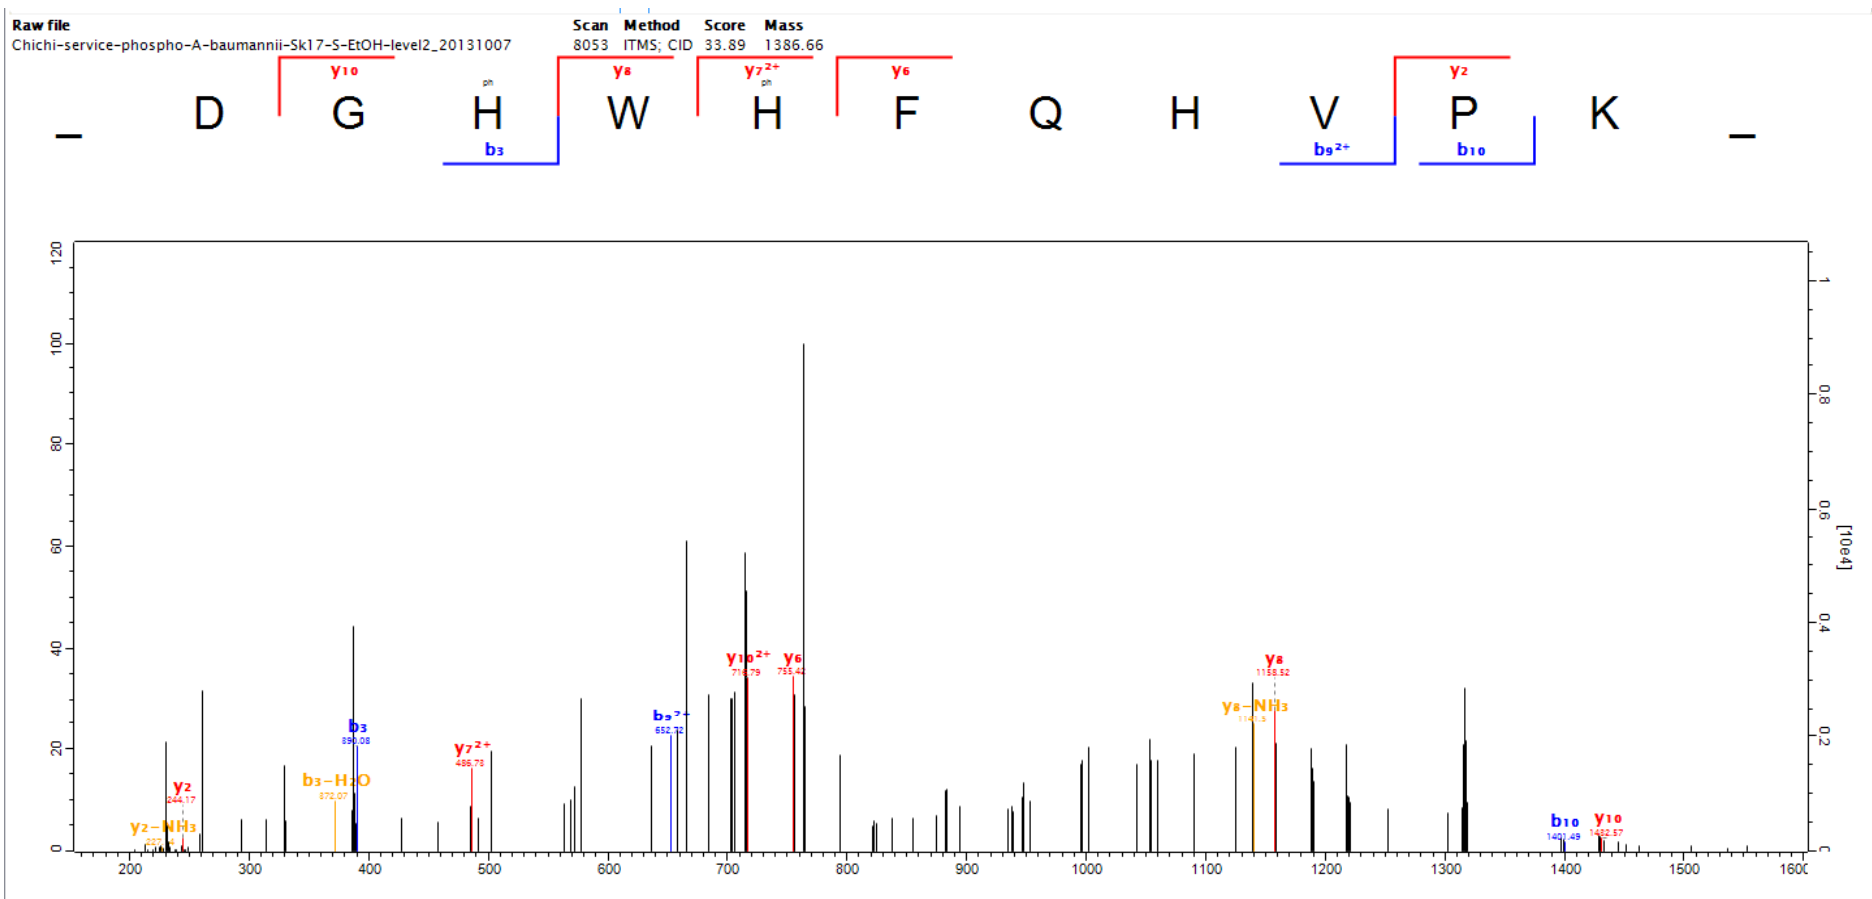

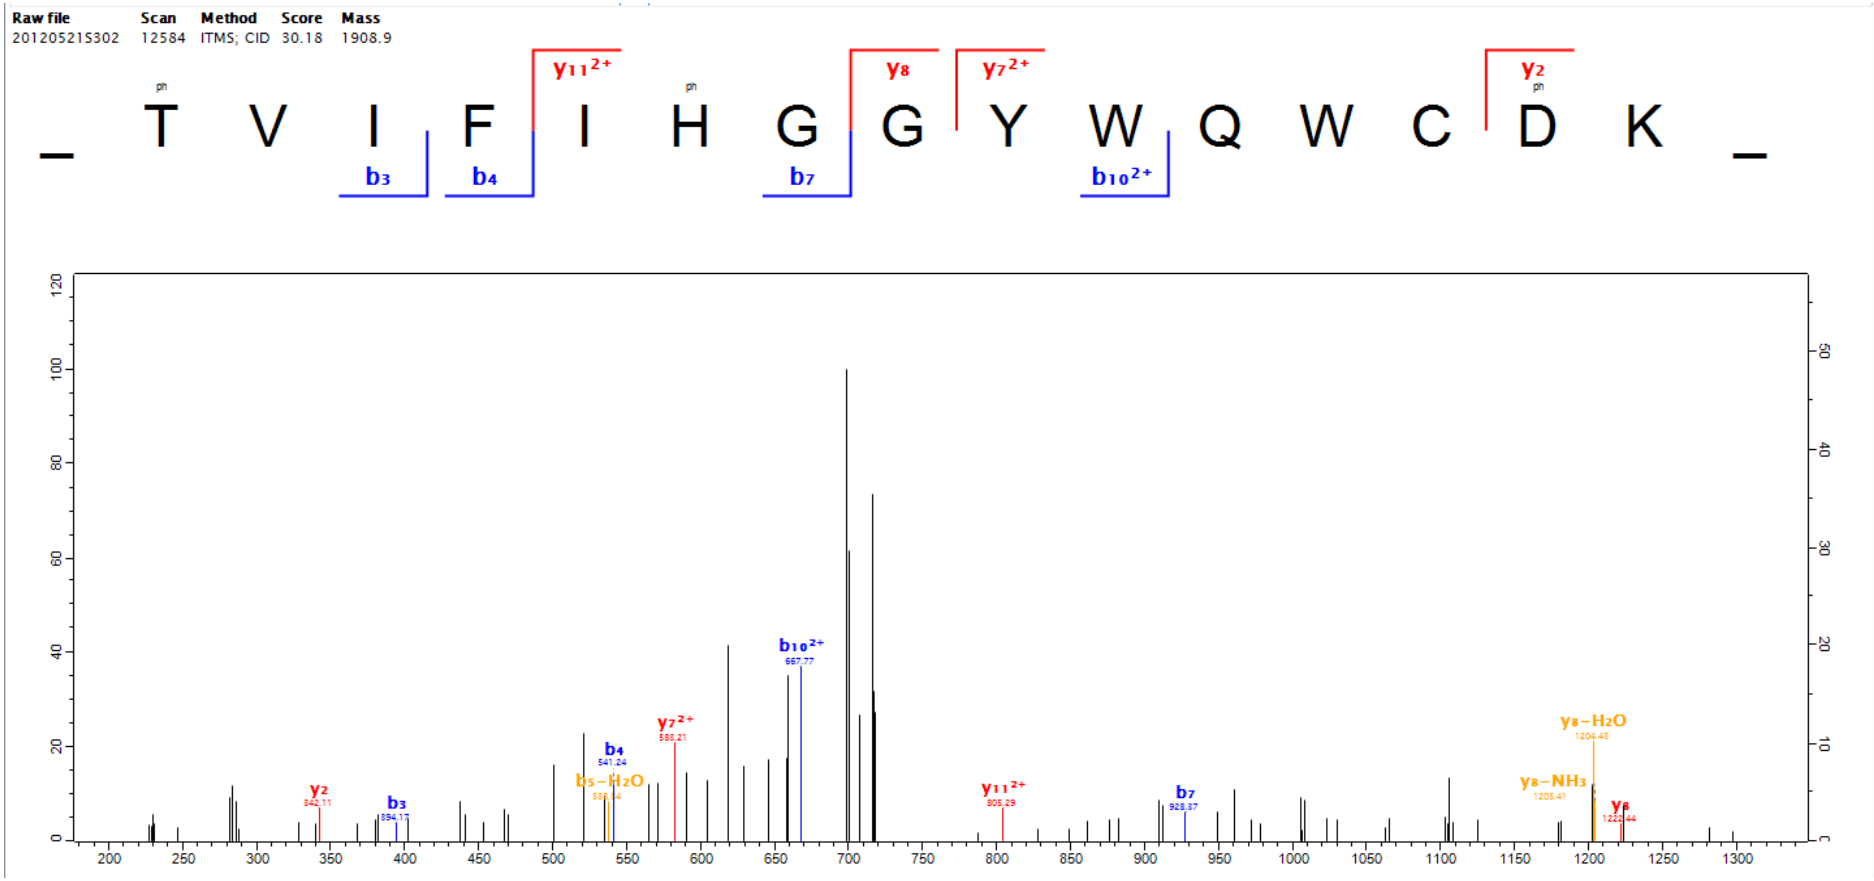

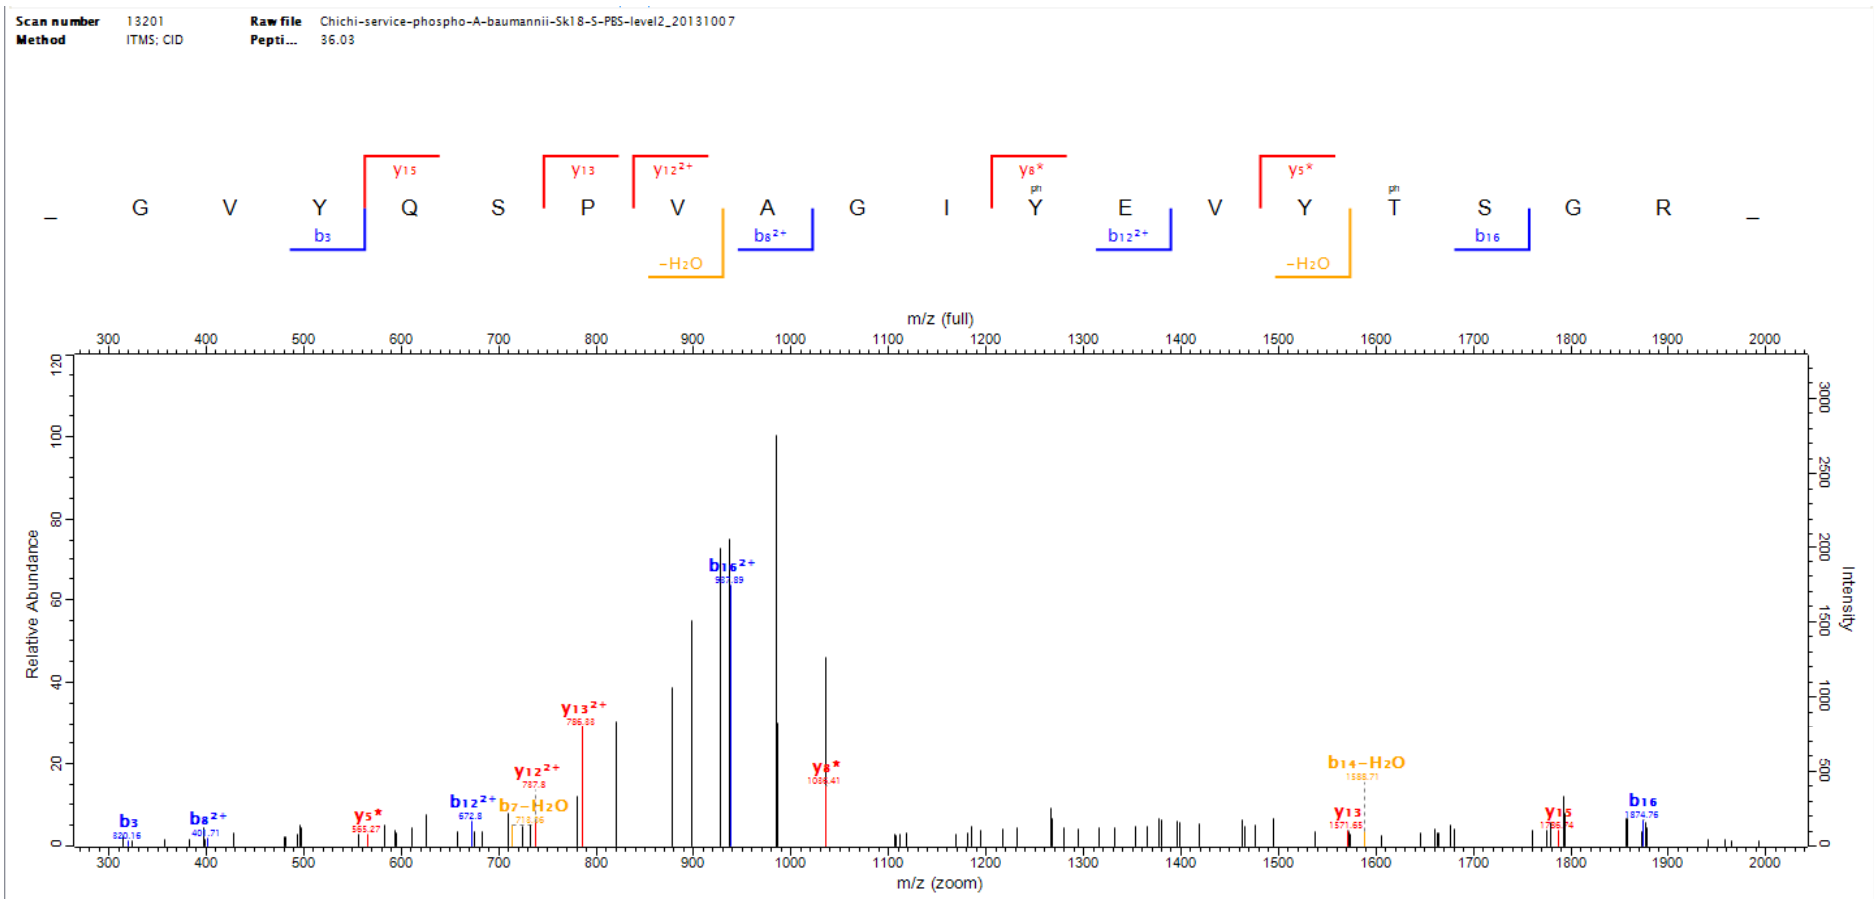



220

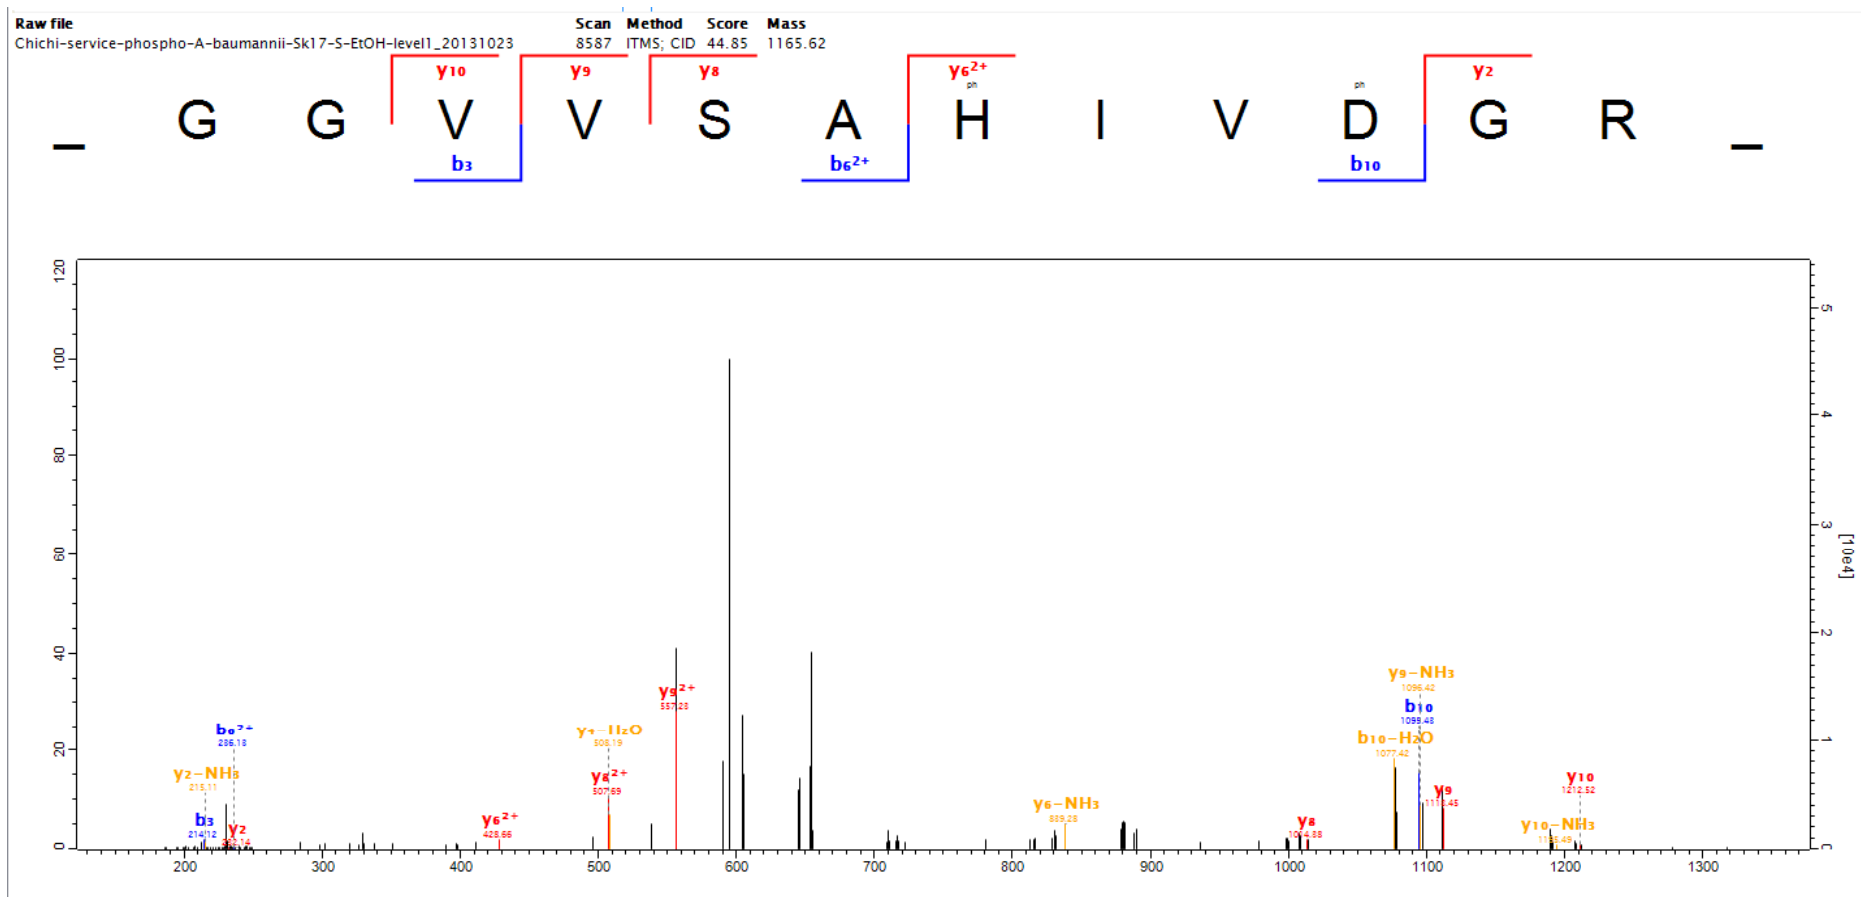

221

Raw file Scan Method Score Mass  
SK175-2 1024 ITMS; CID 30.57 1449.66

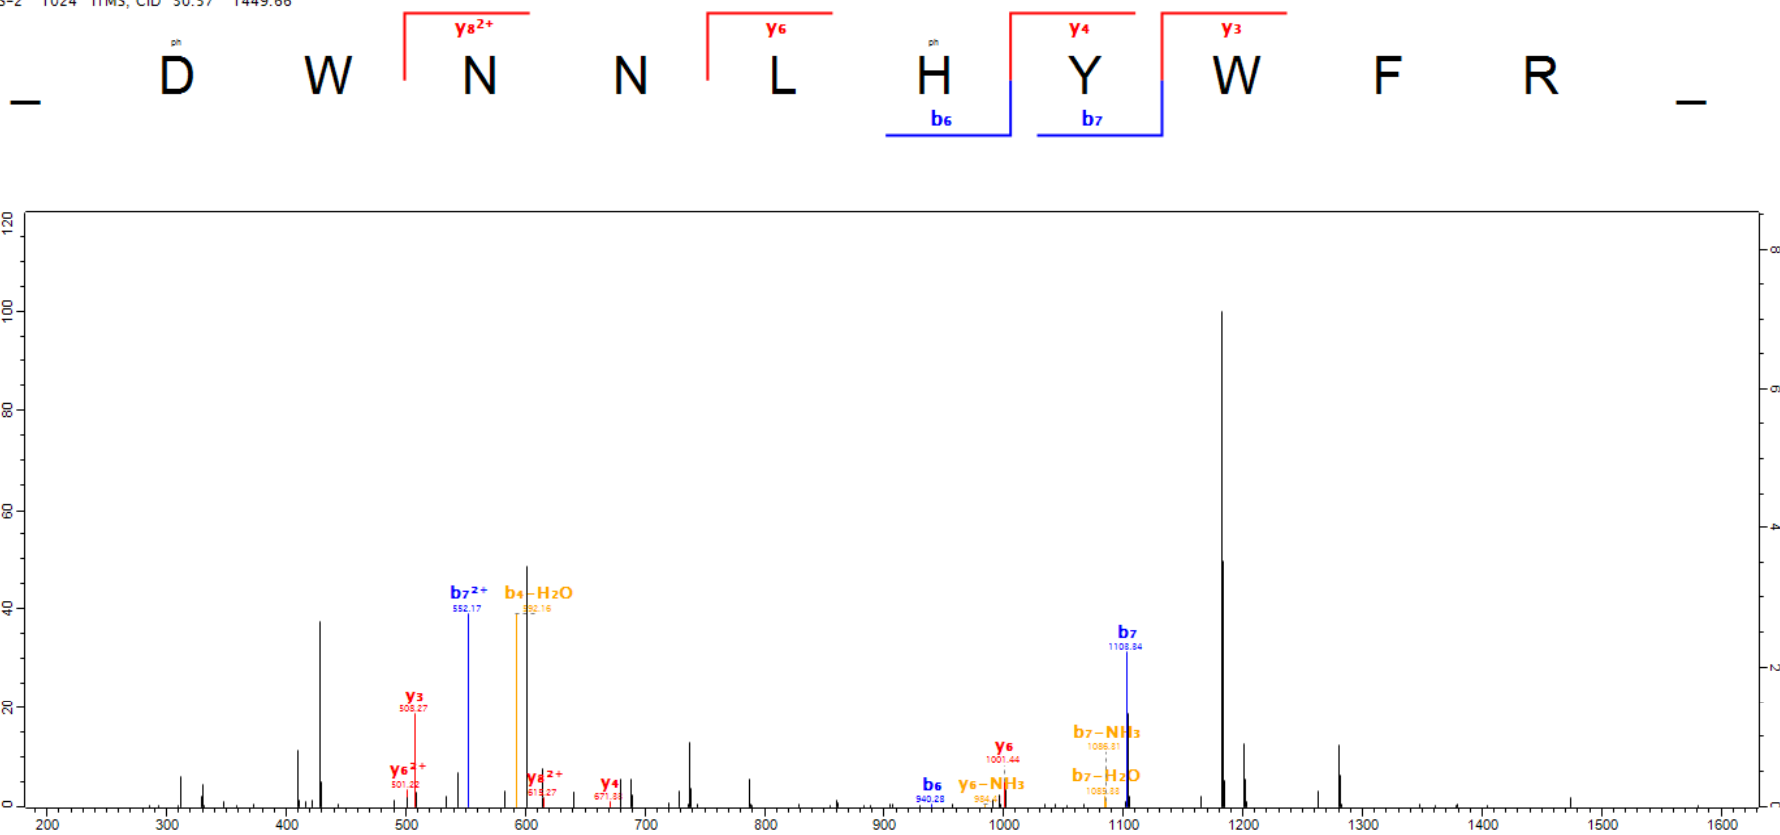

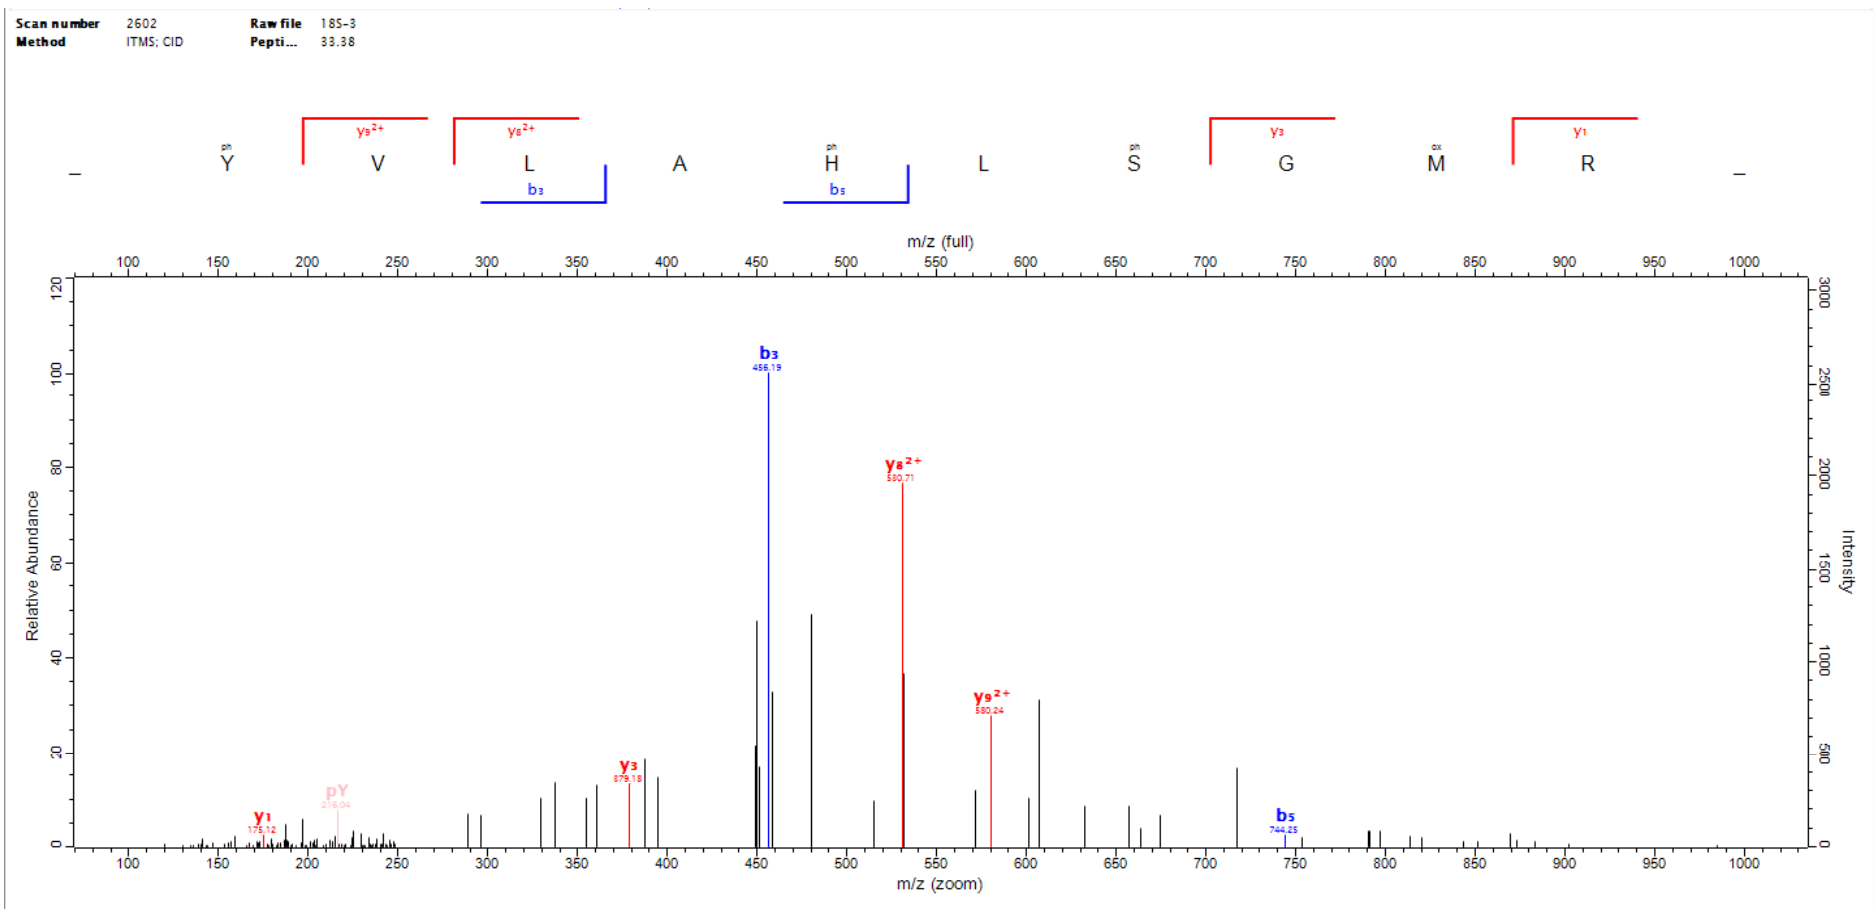

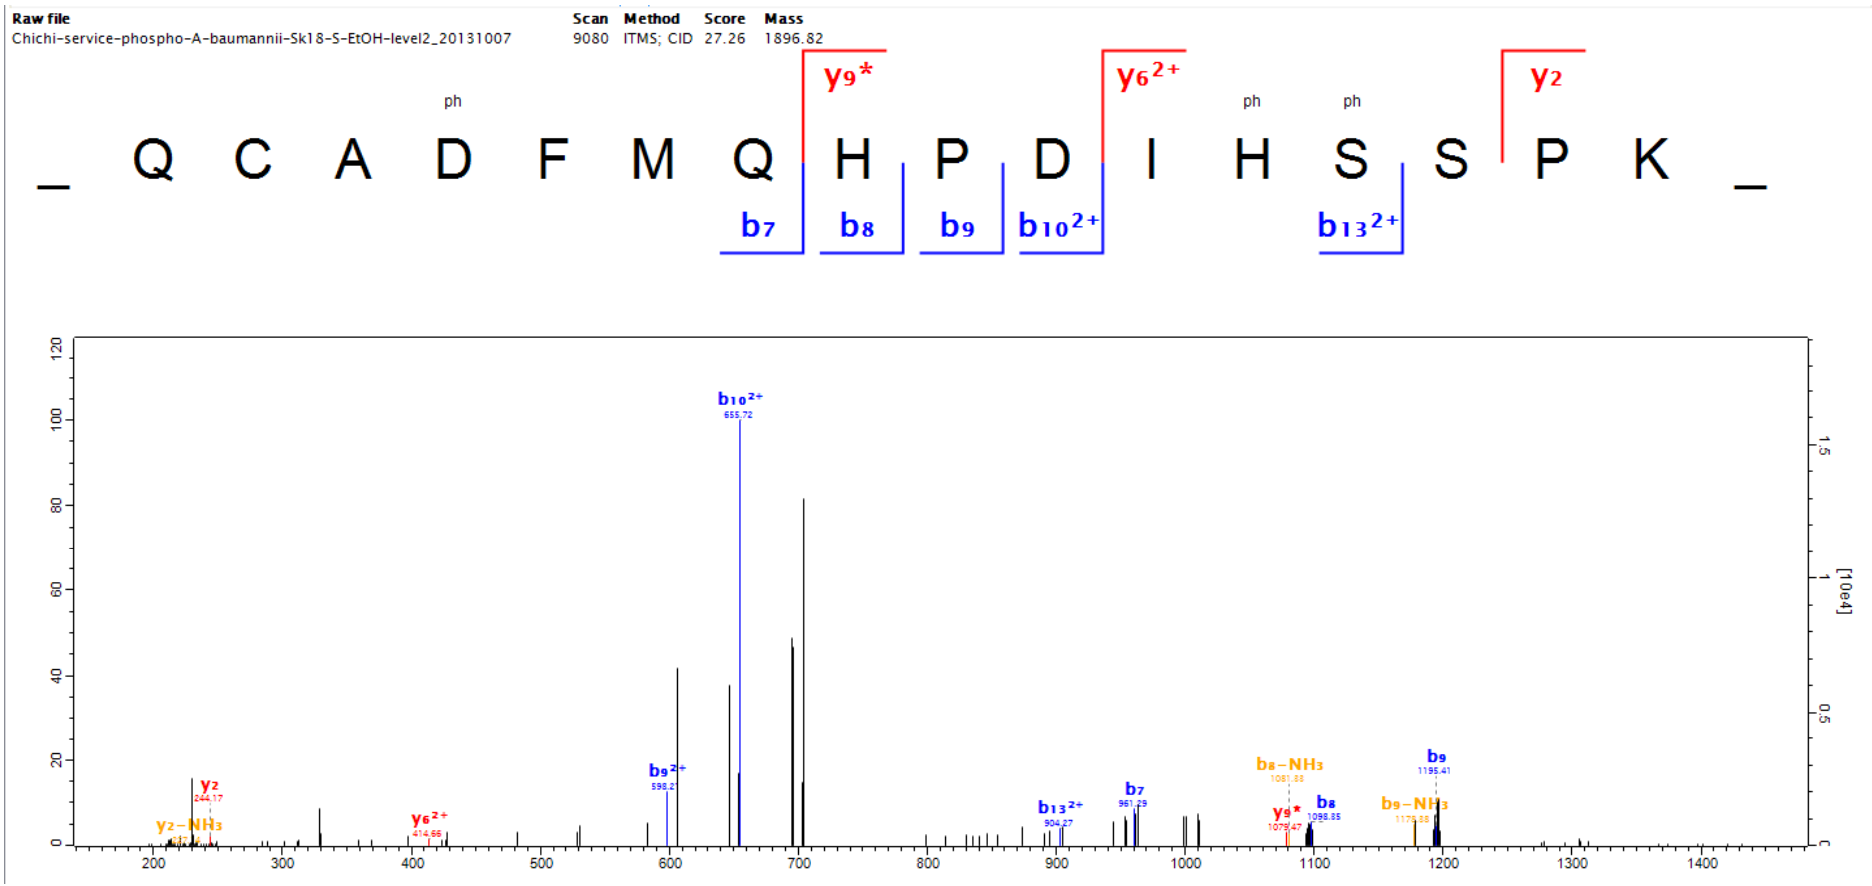

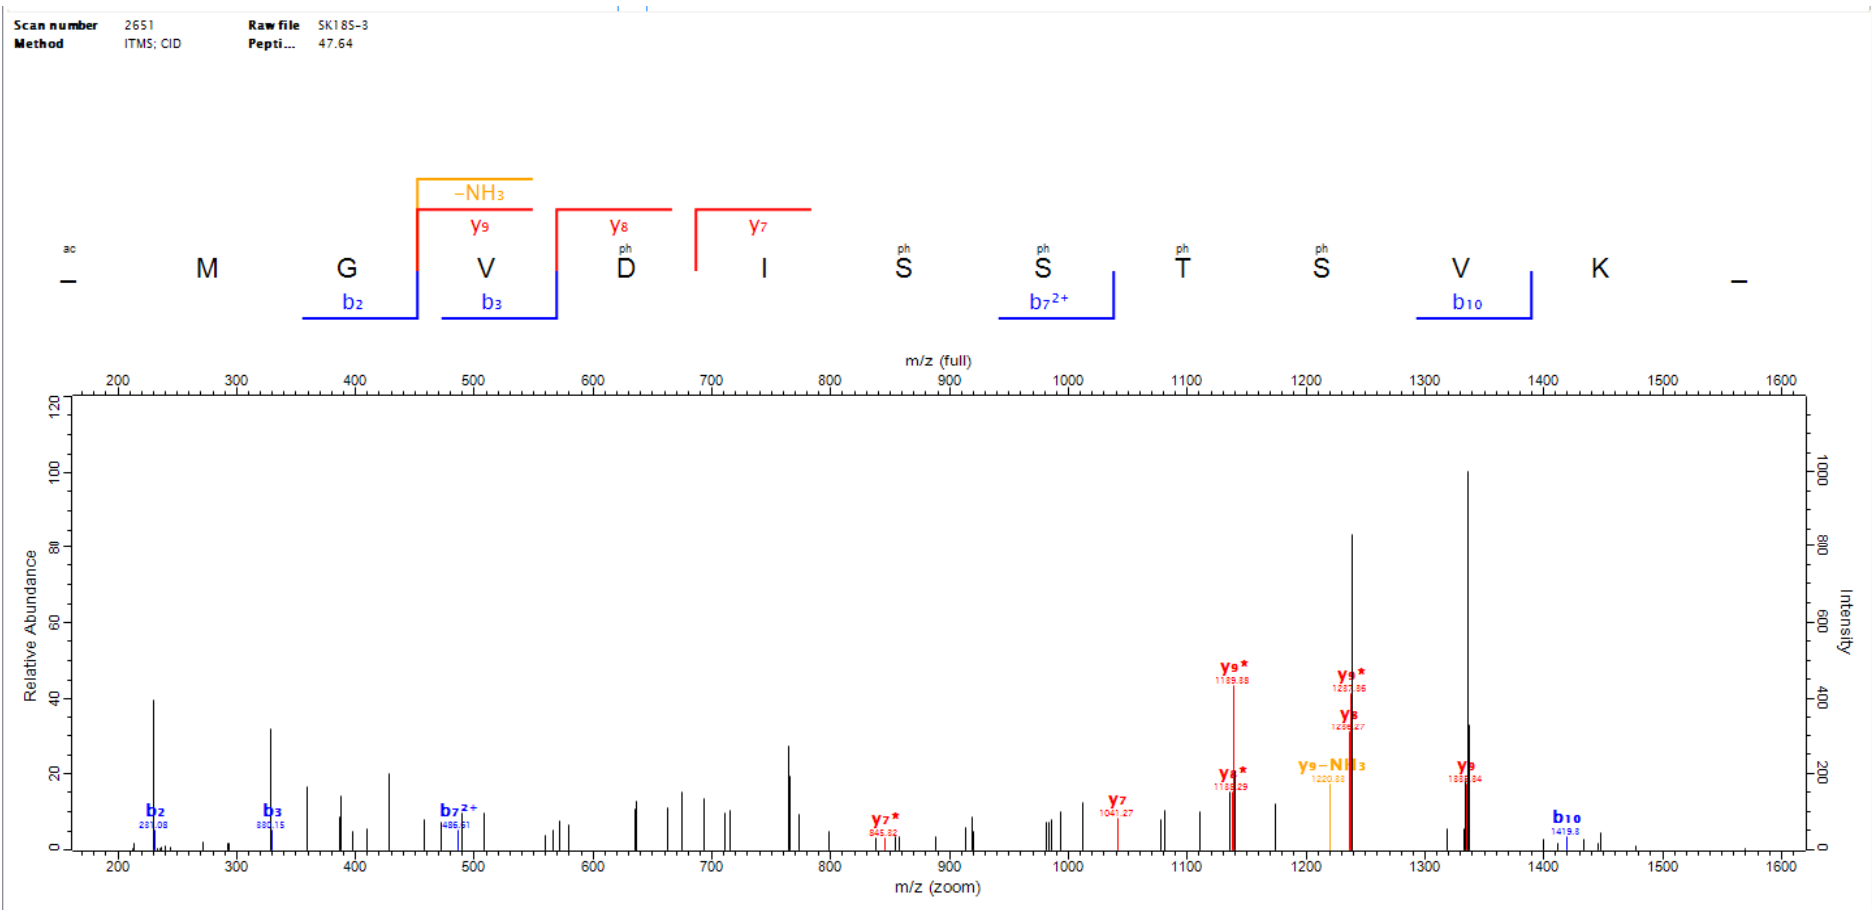

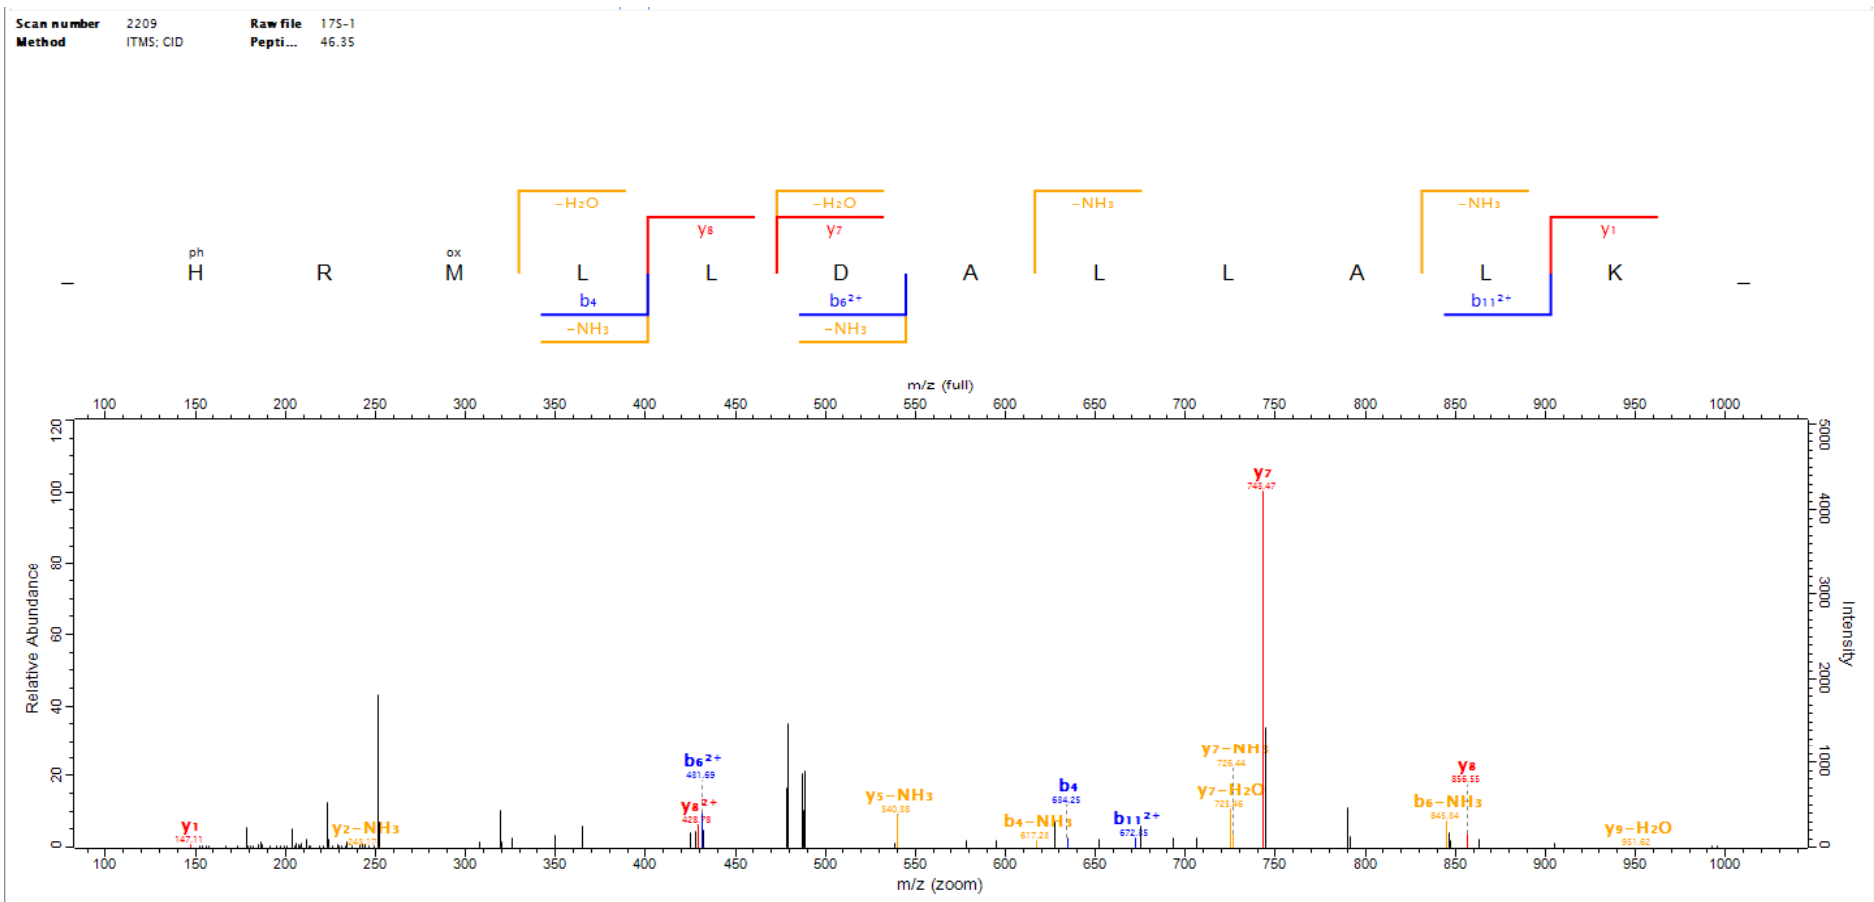

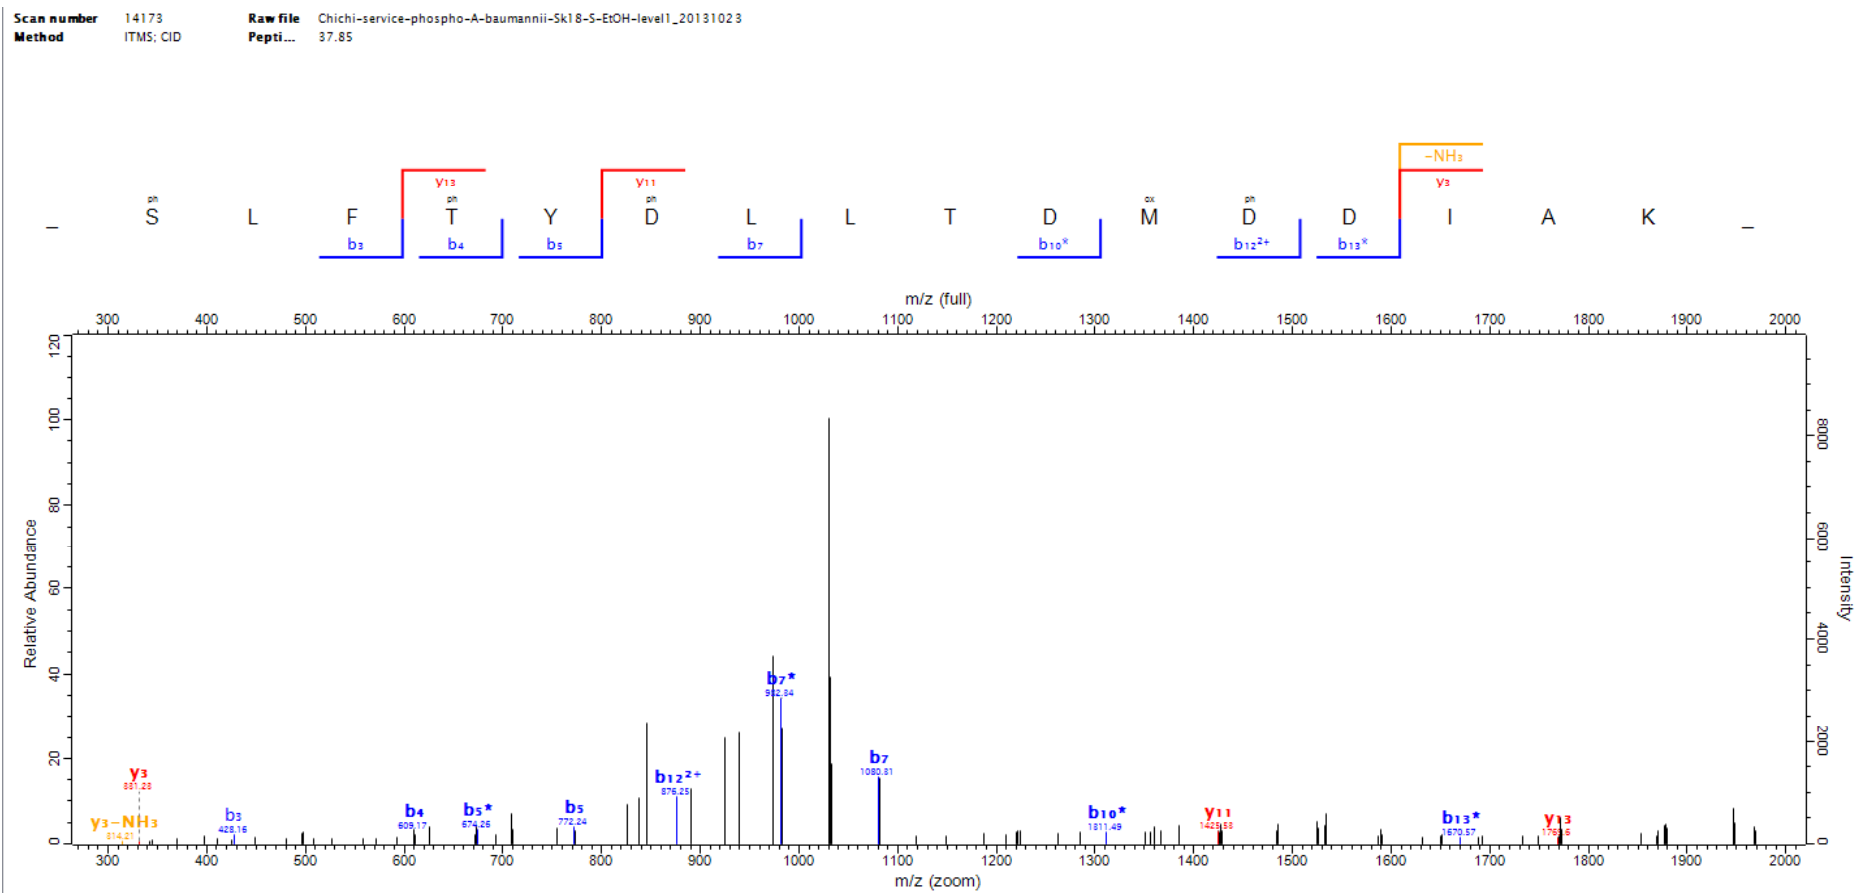

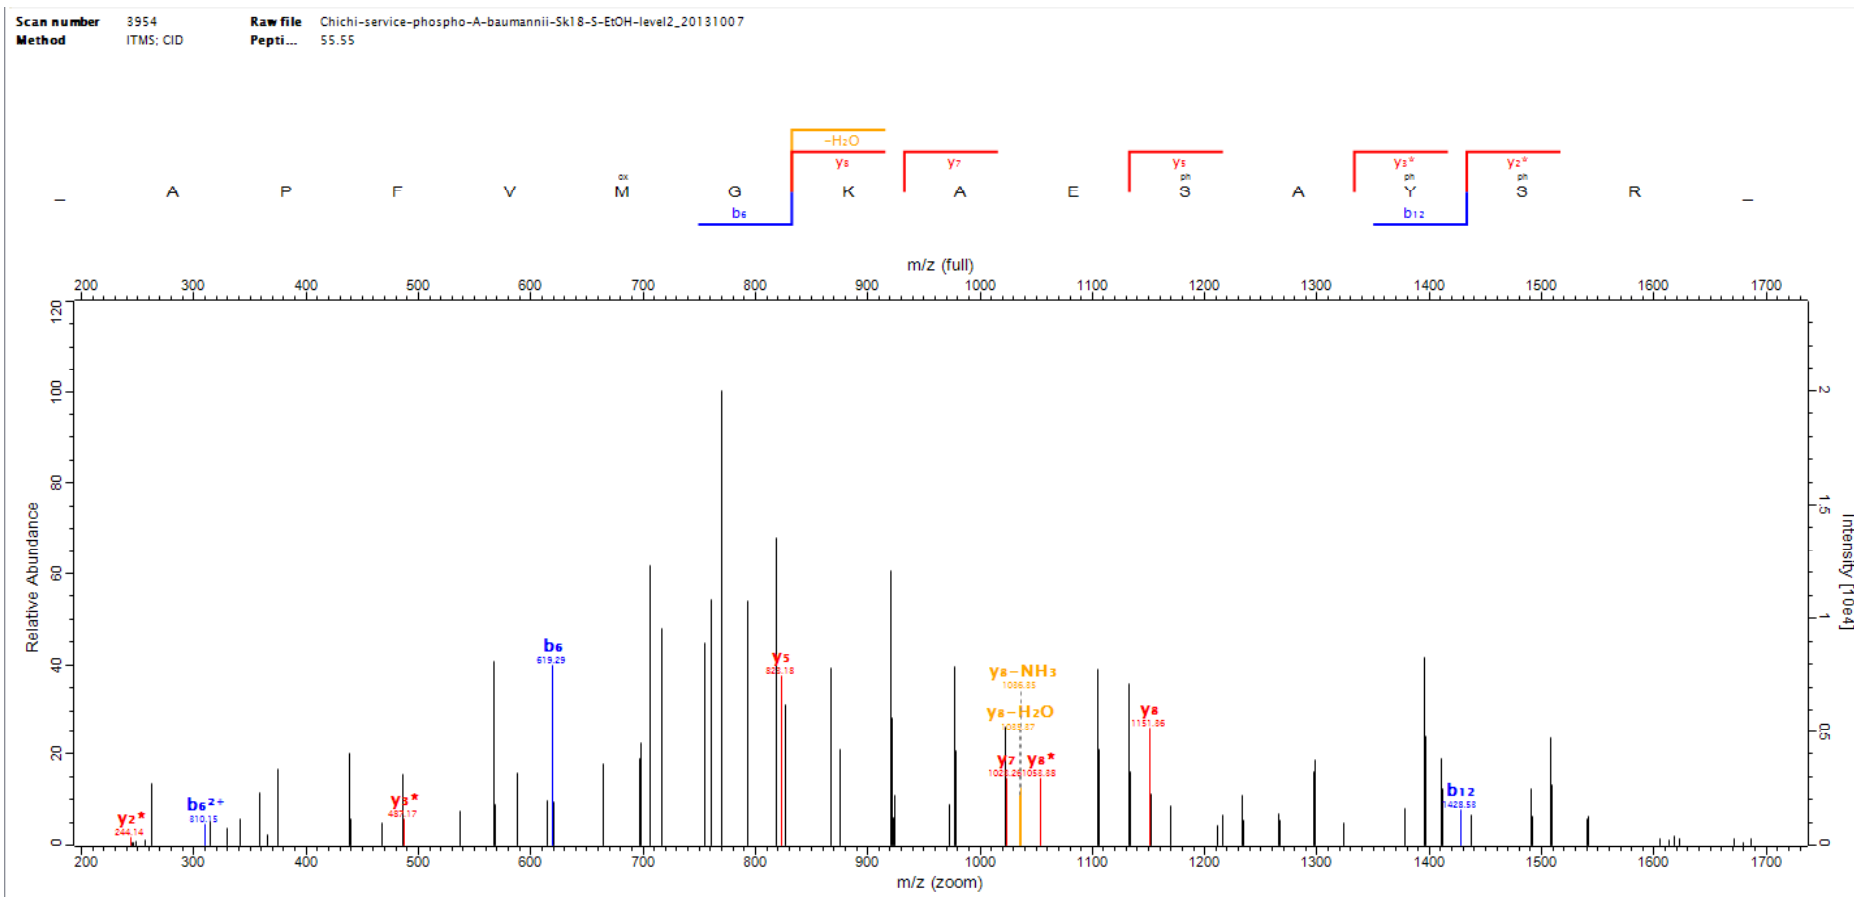



Scan number 4068 Raw file Chichi-service-phospho-A-baumannii-Sk18-5-PBS-level1\_20131023  
 Method ITMS: CID Pepti... 37.56

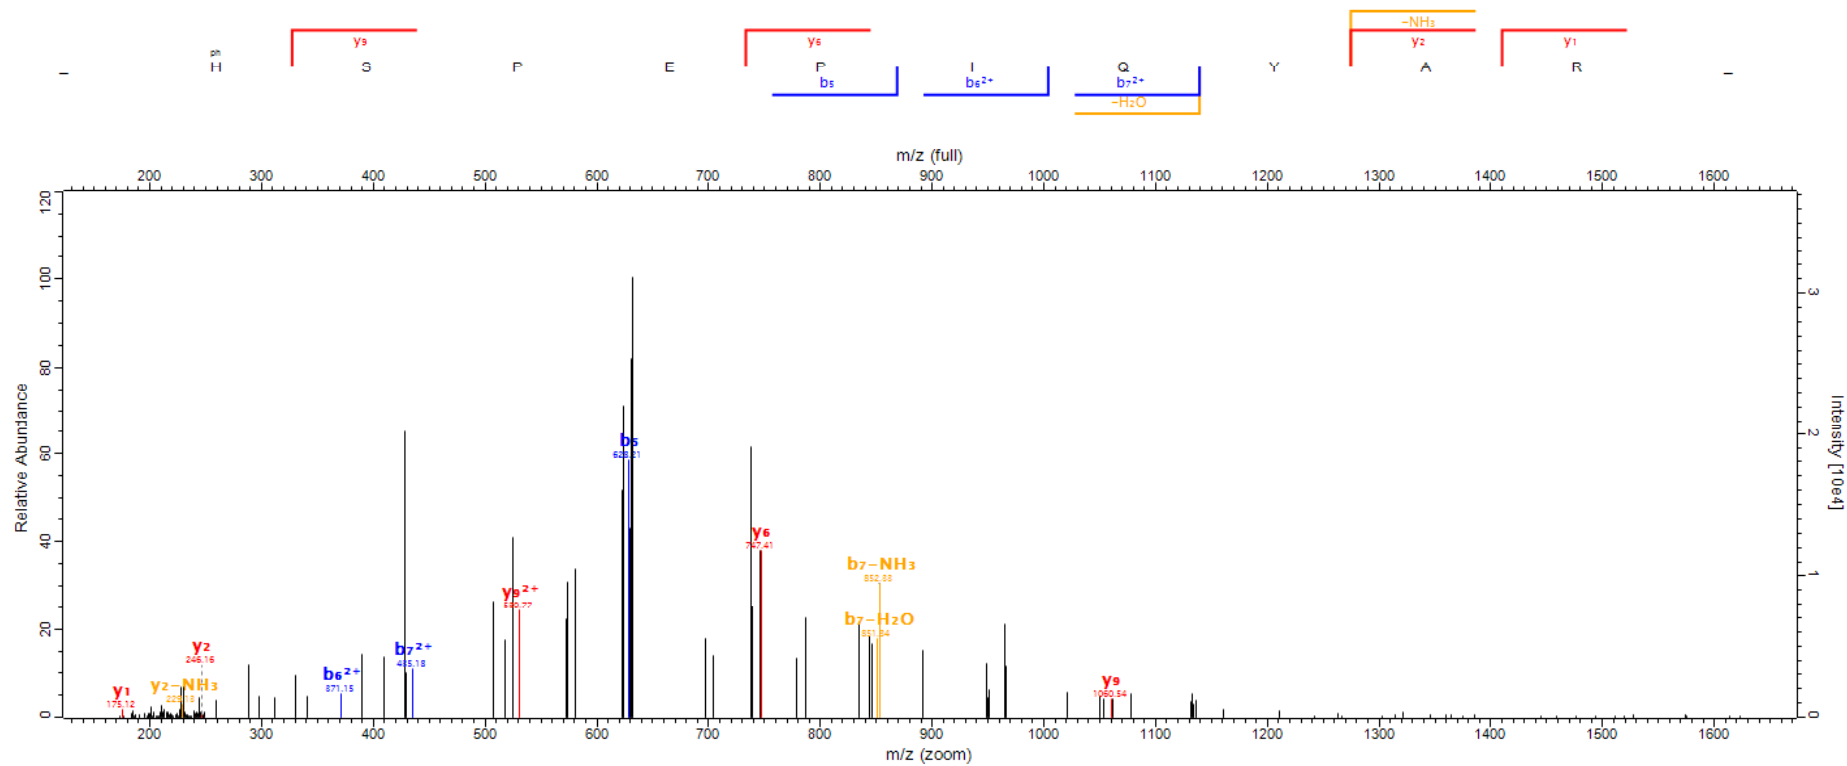

229-1

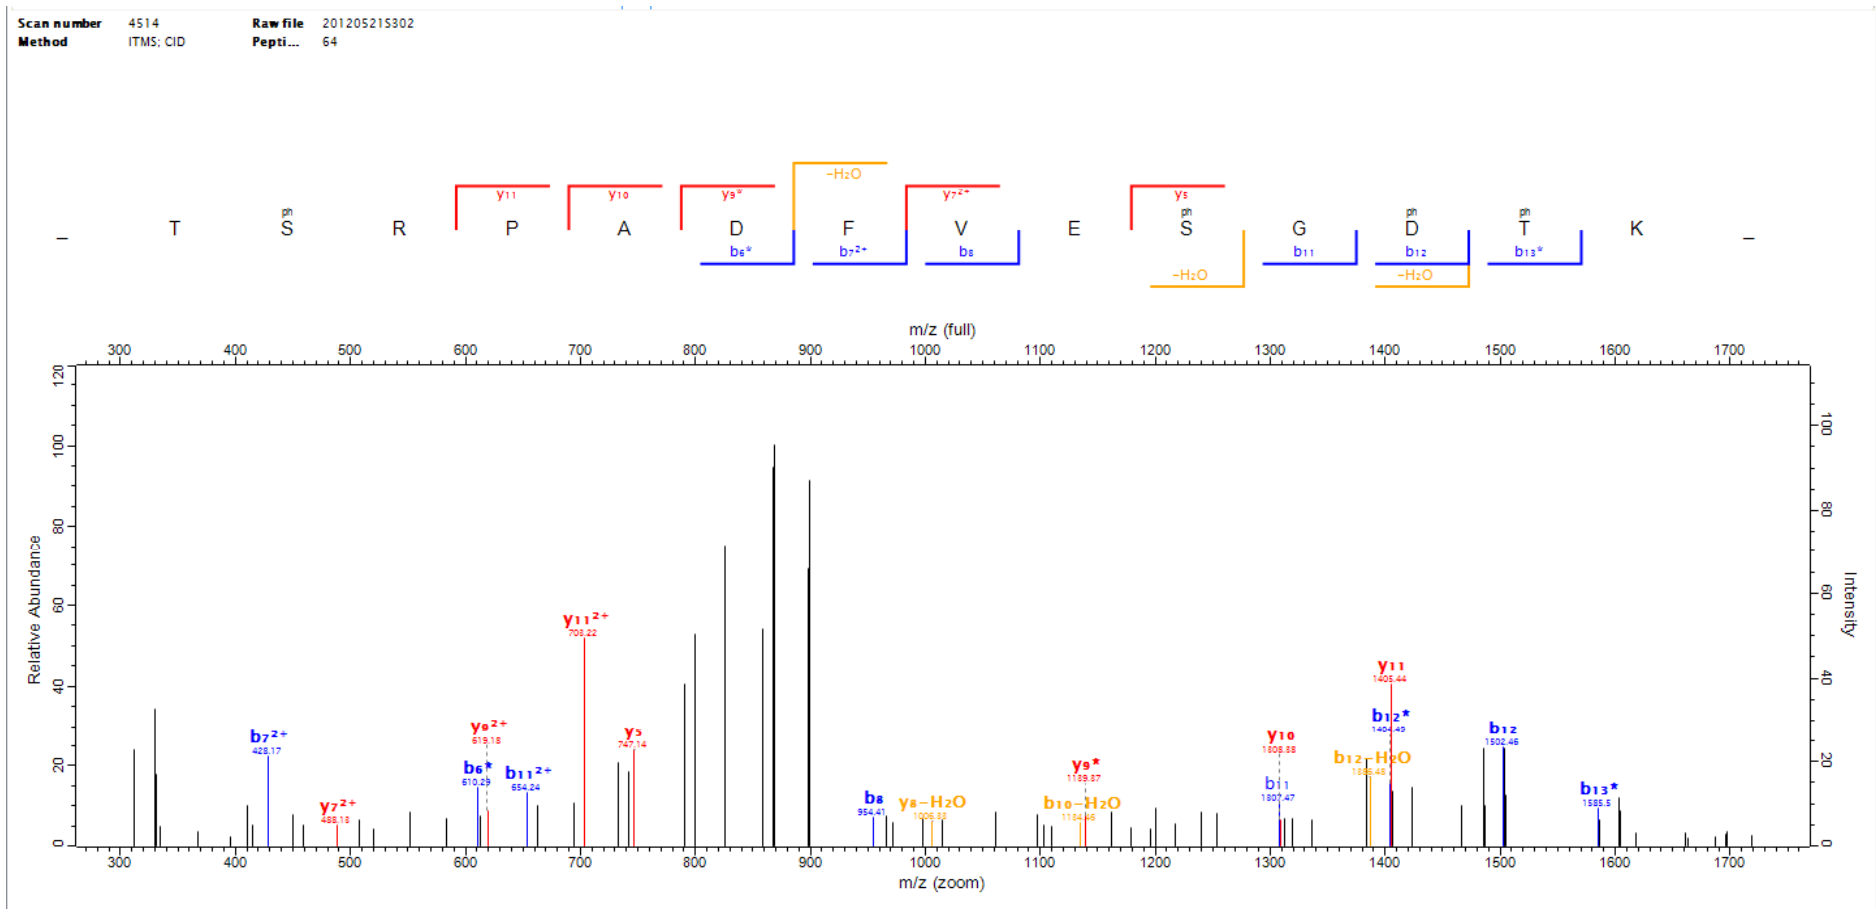

229-2

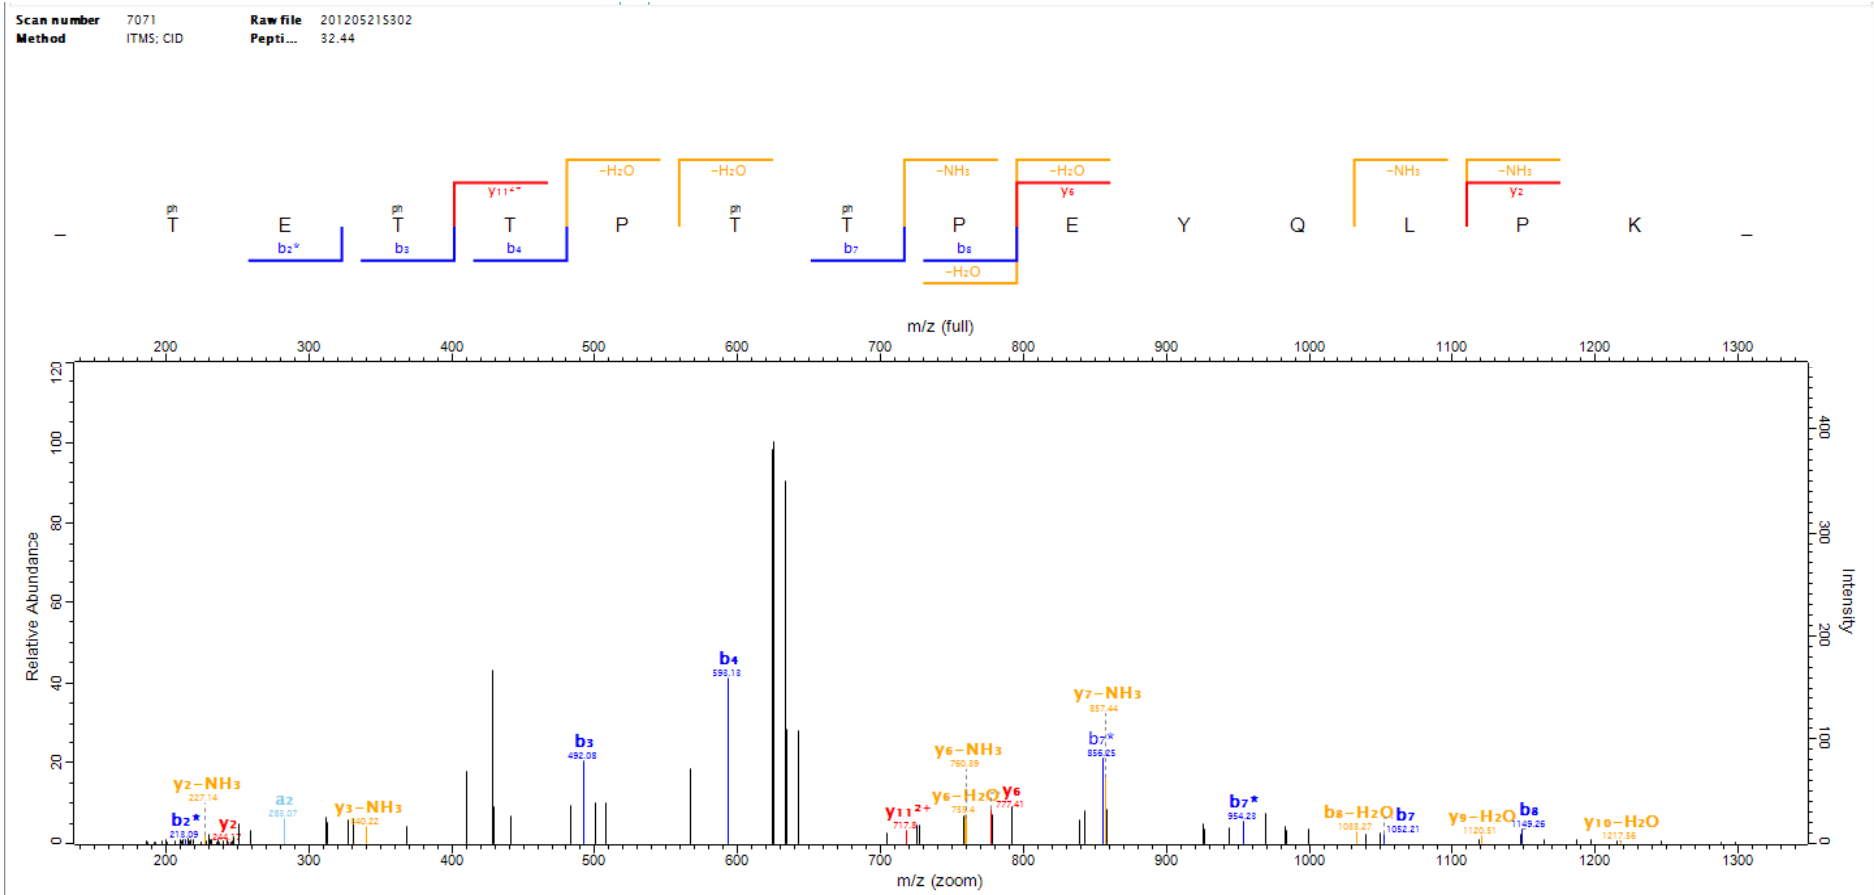

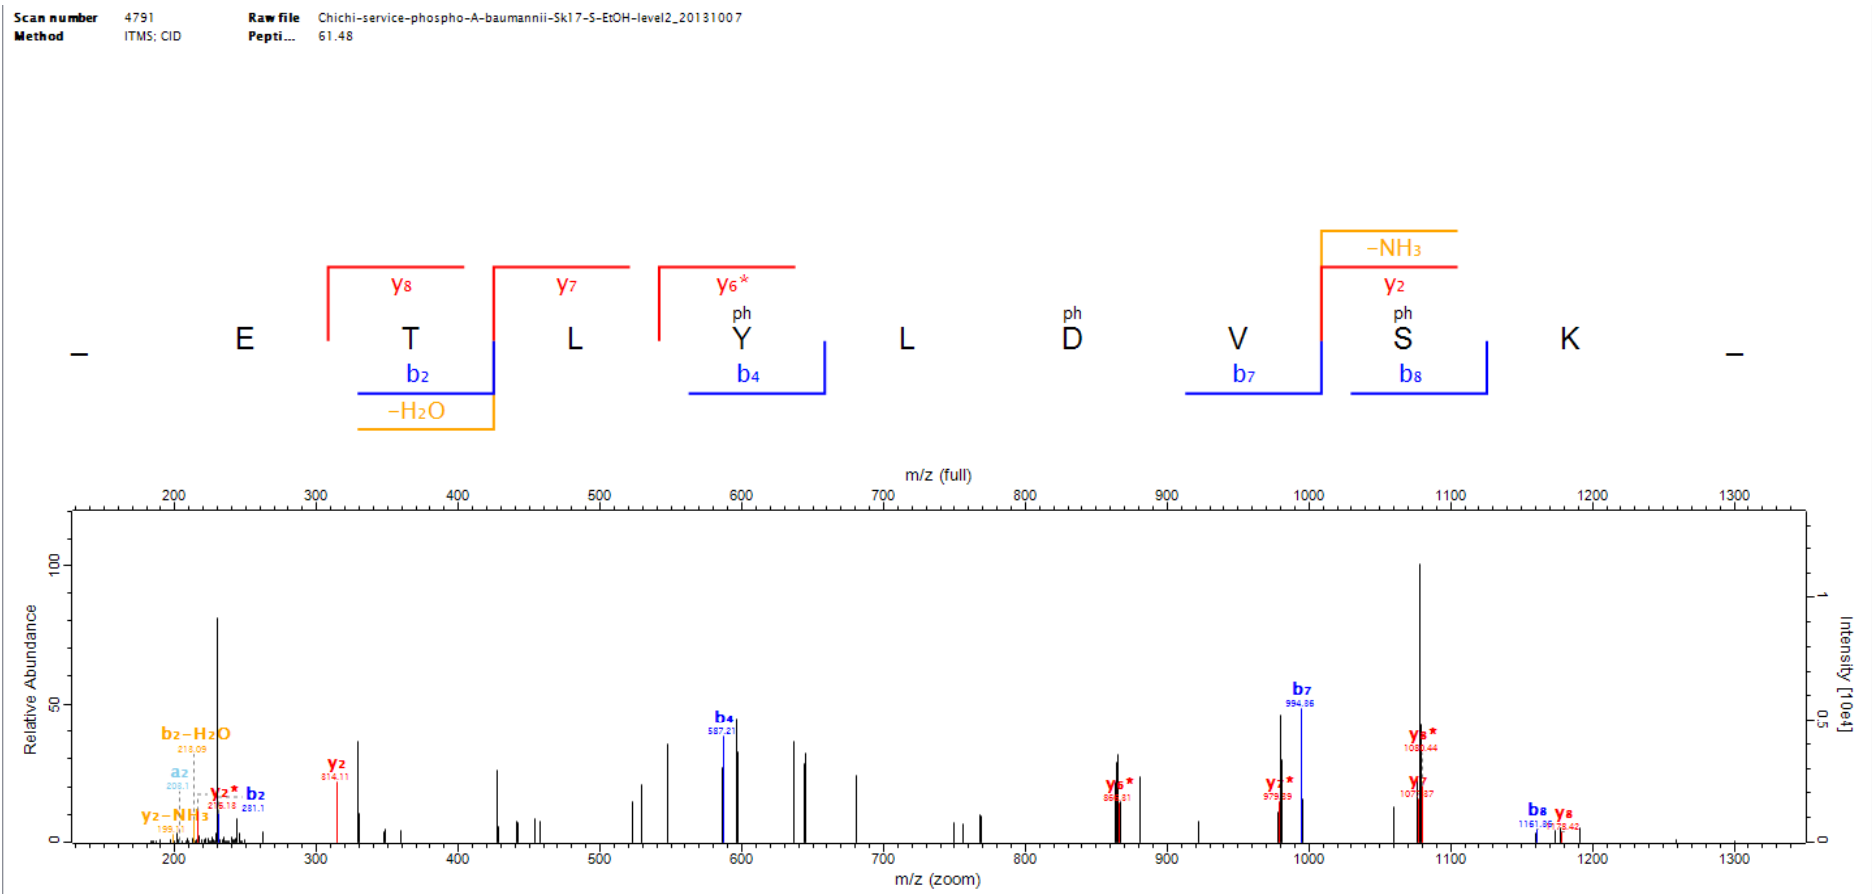

231-1

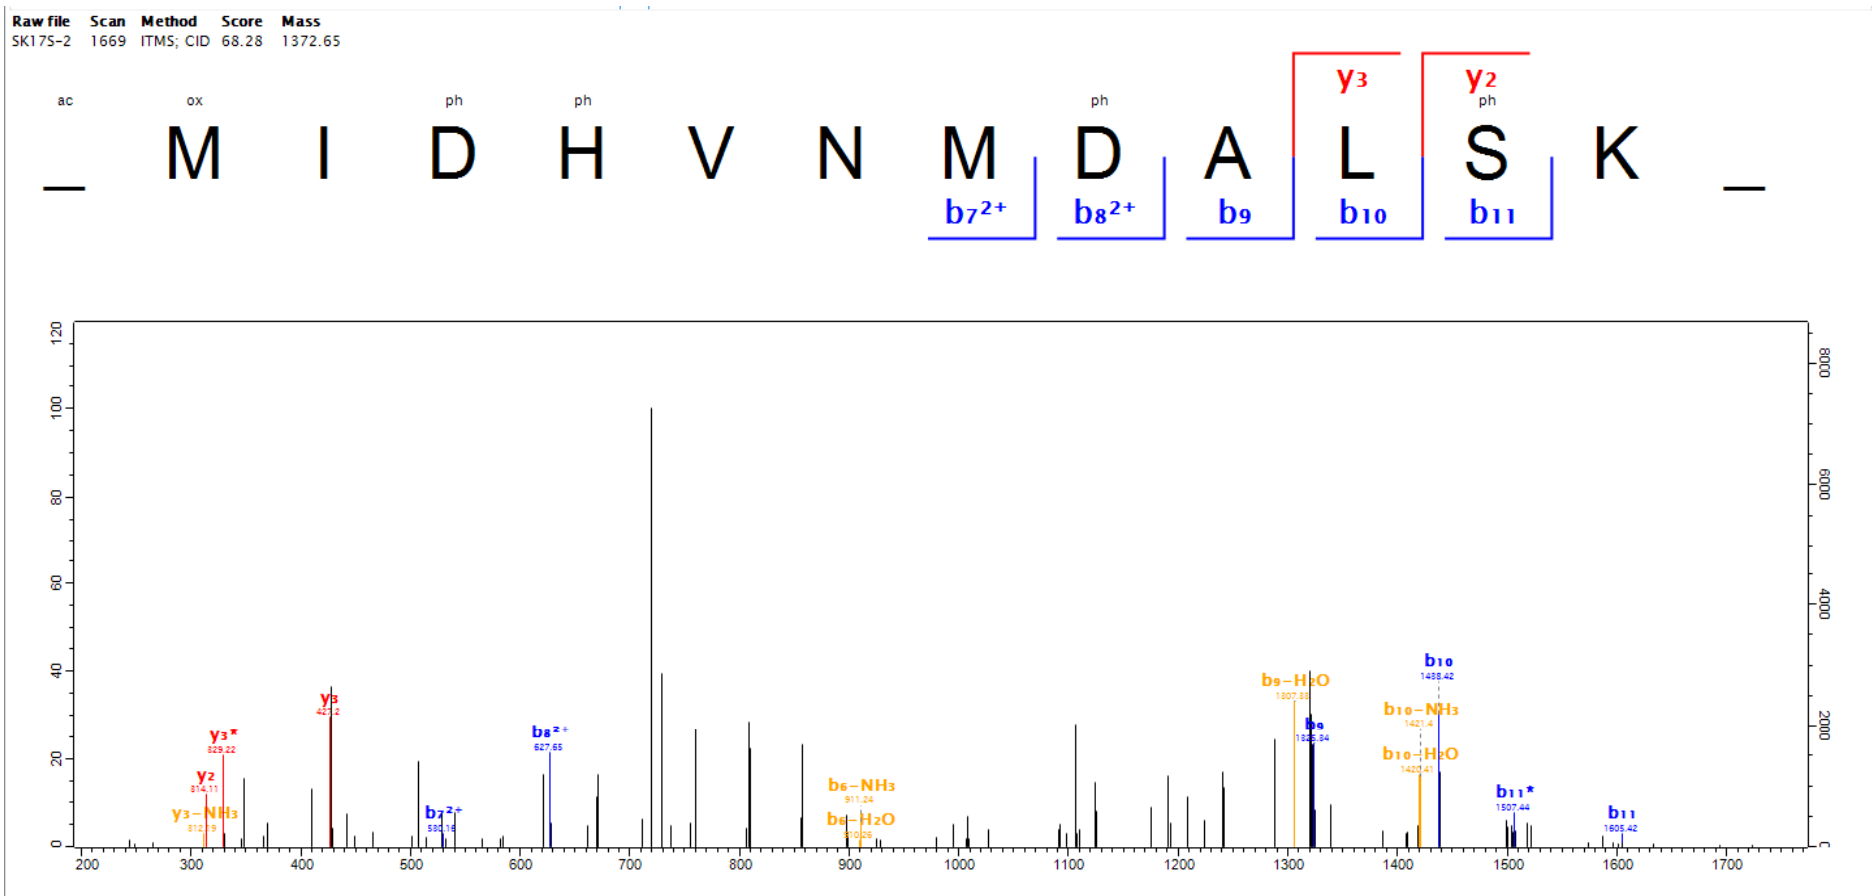

# 231-2

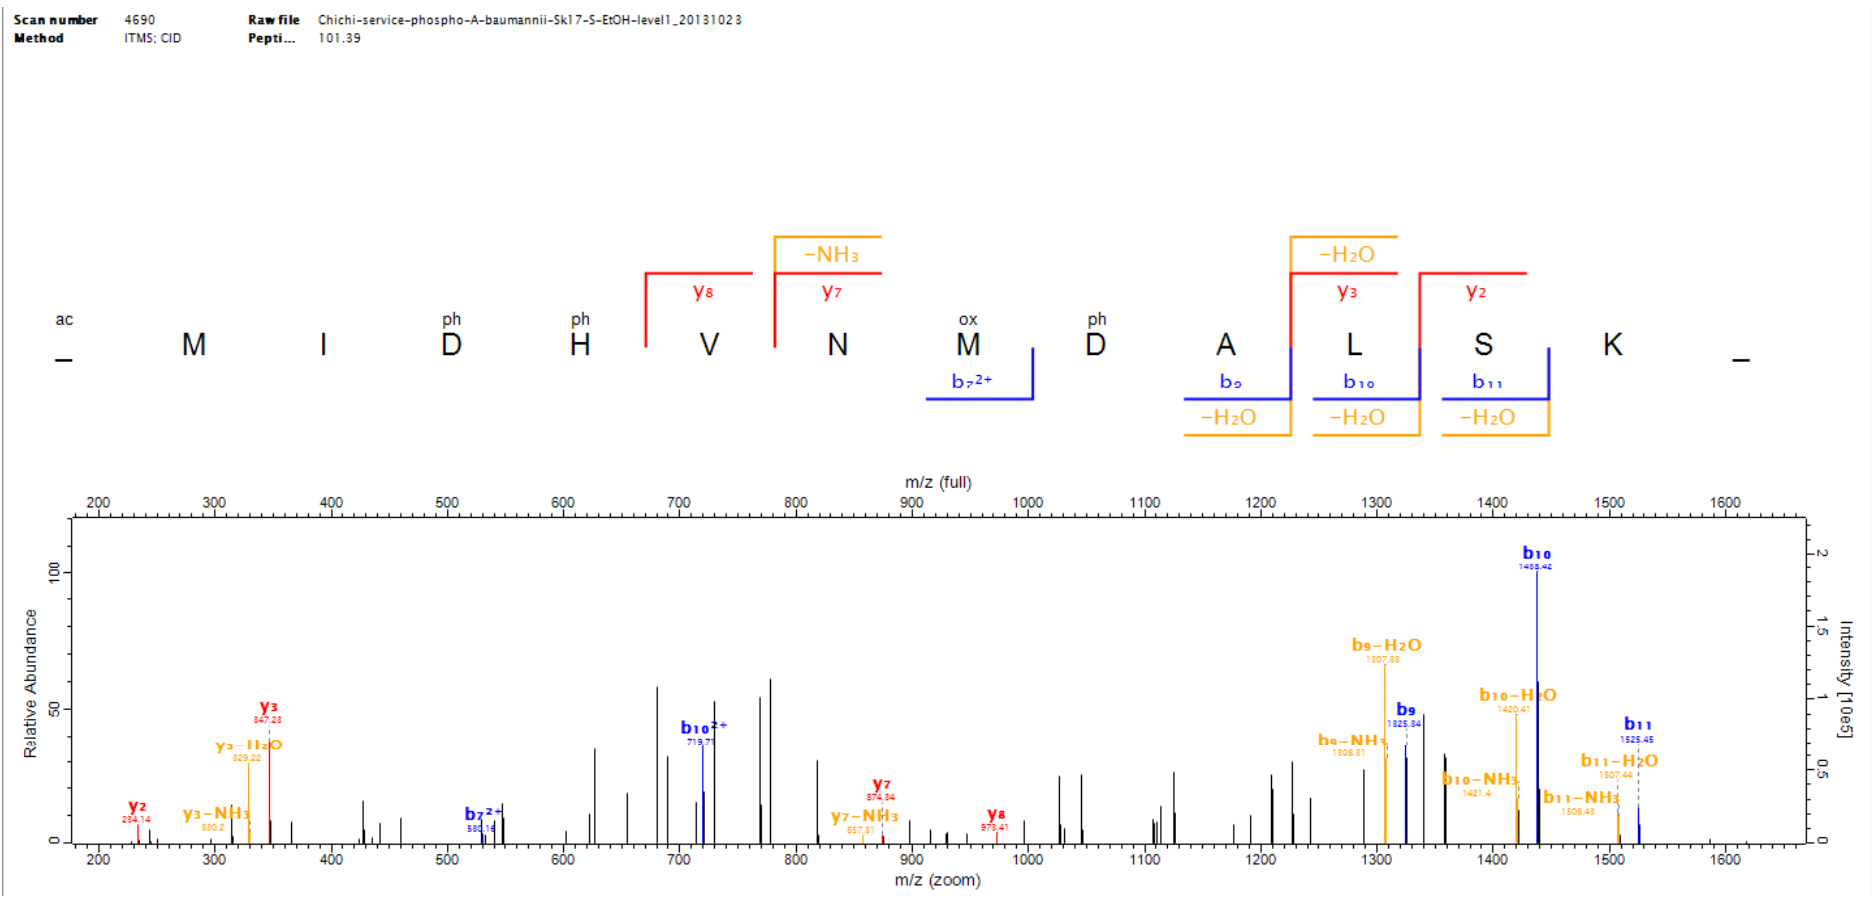

Scan number 14324 Raw file Chichi-service-phospho-A-baumannii-Sk17-5-EtOH-level2\_20131007  
 Method ITMS: CID Pepti... 34.22

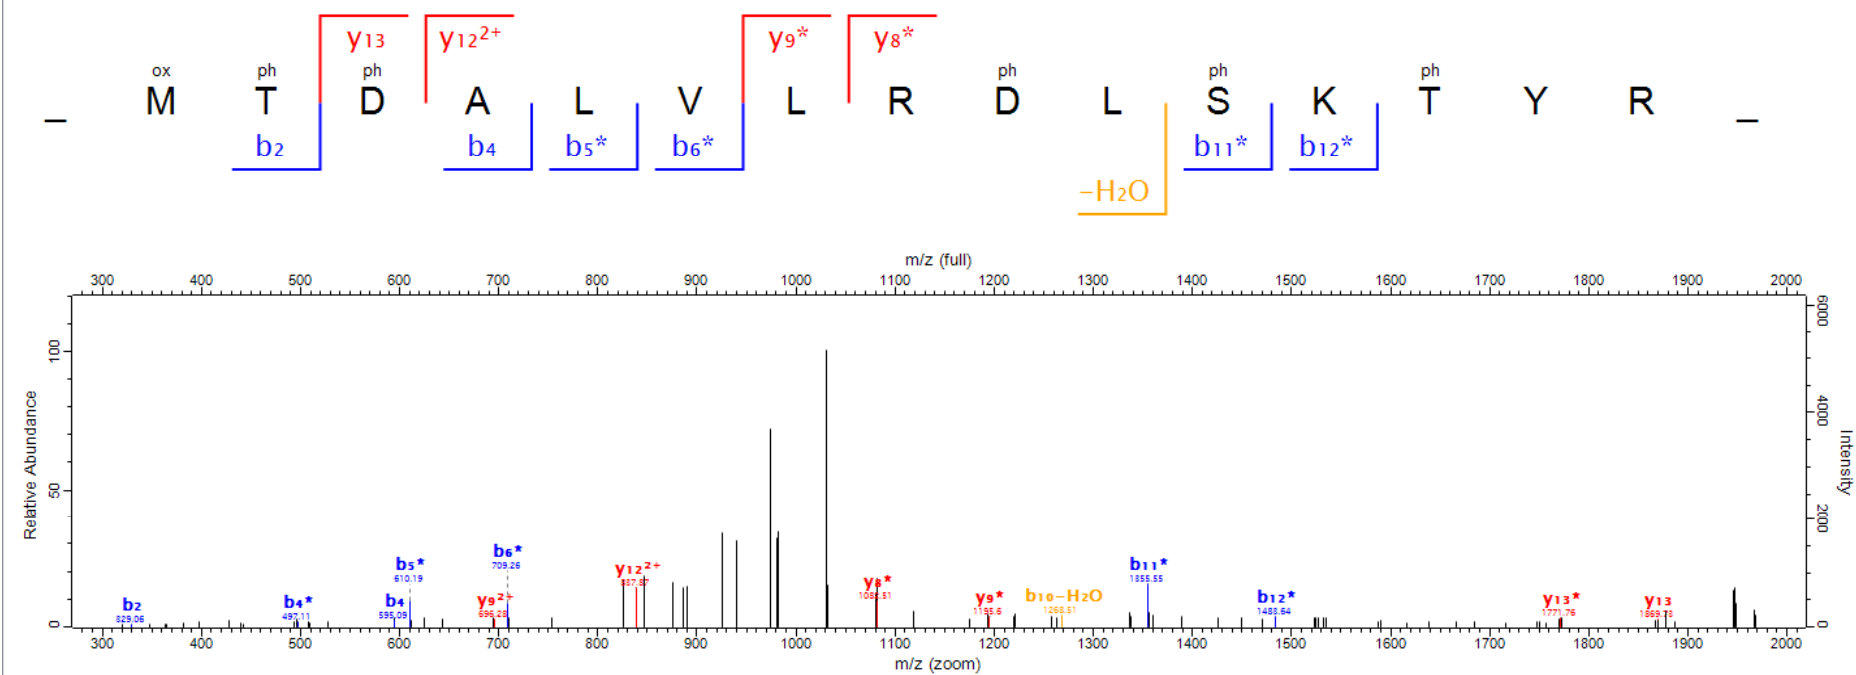

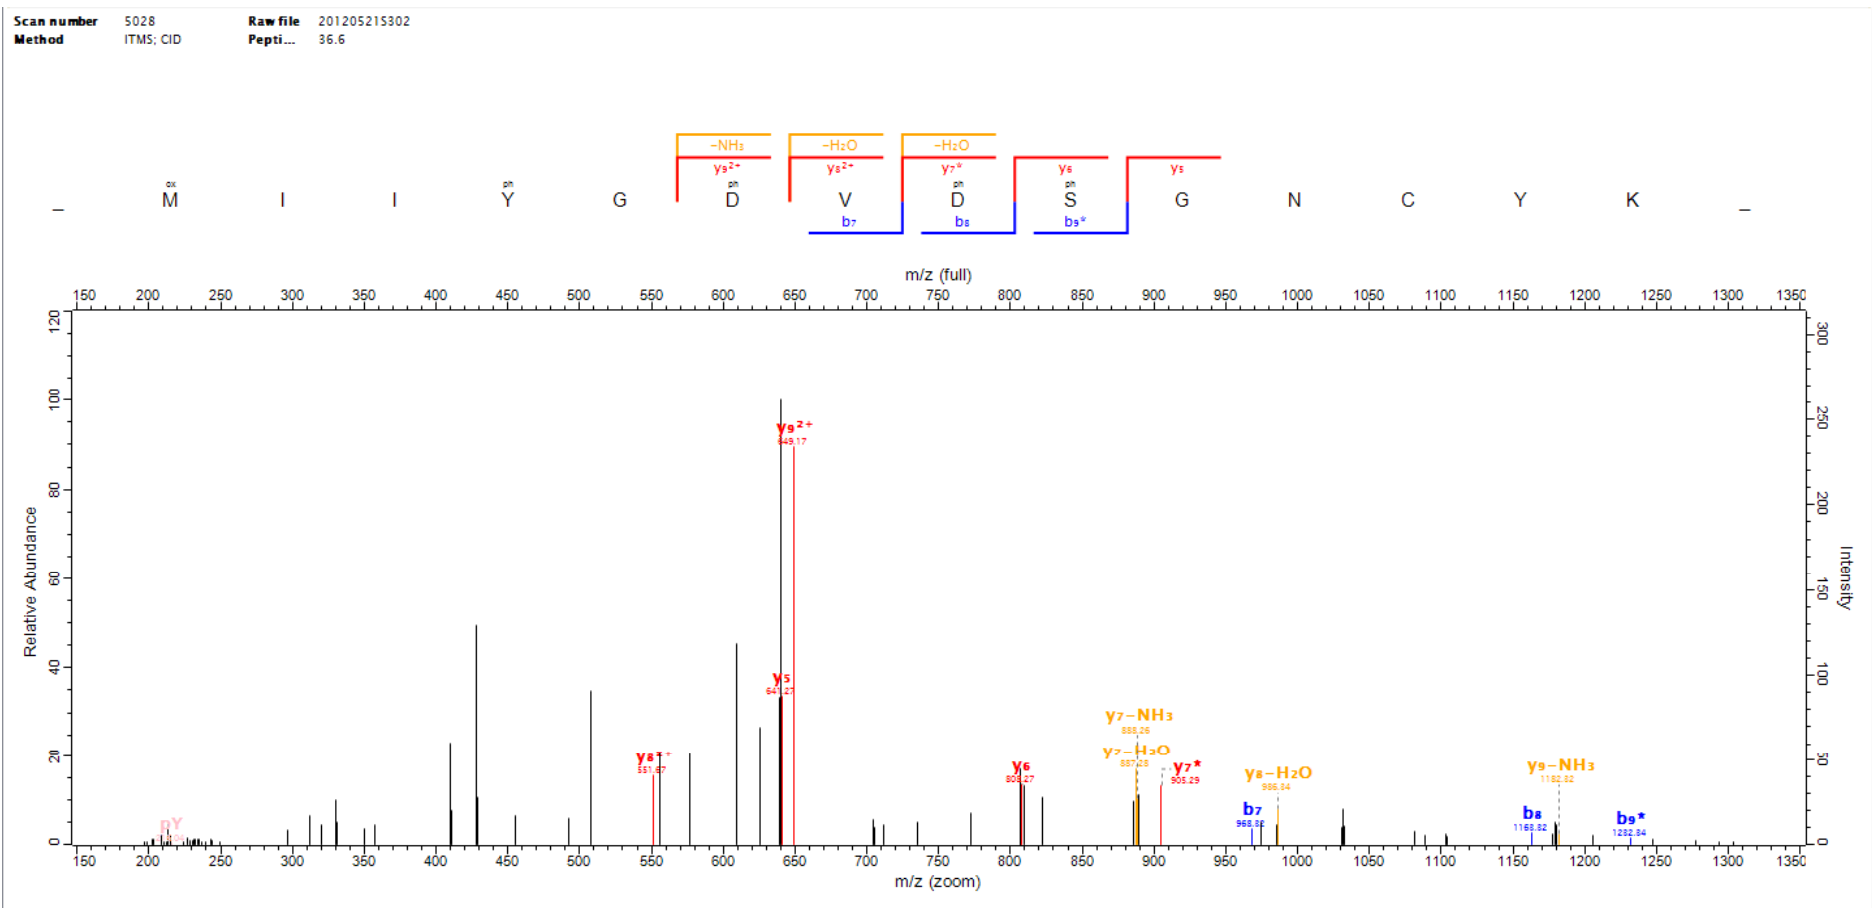



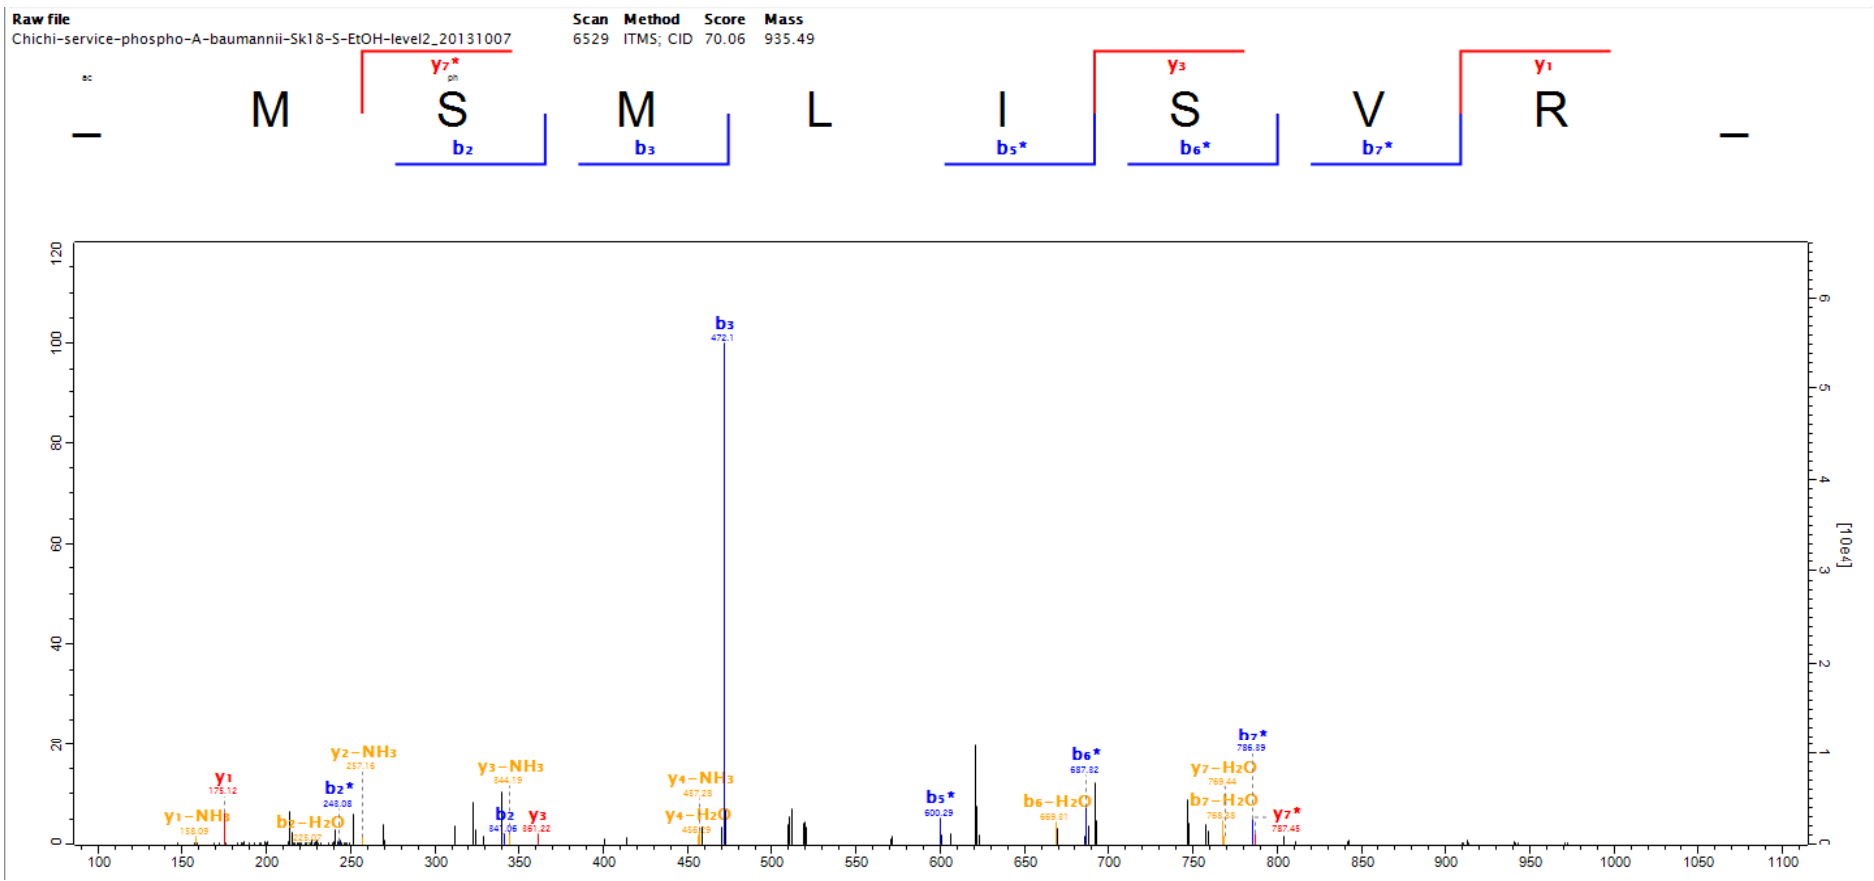

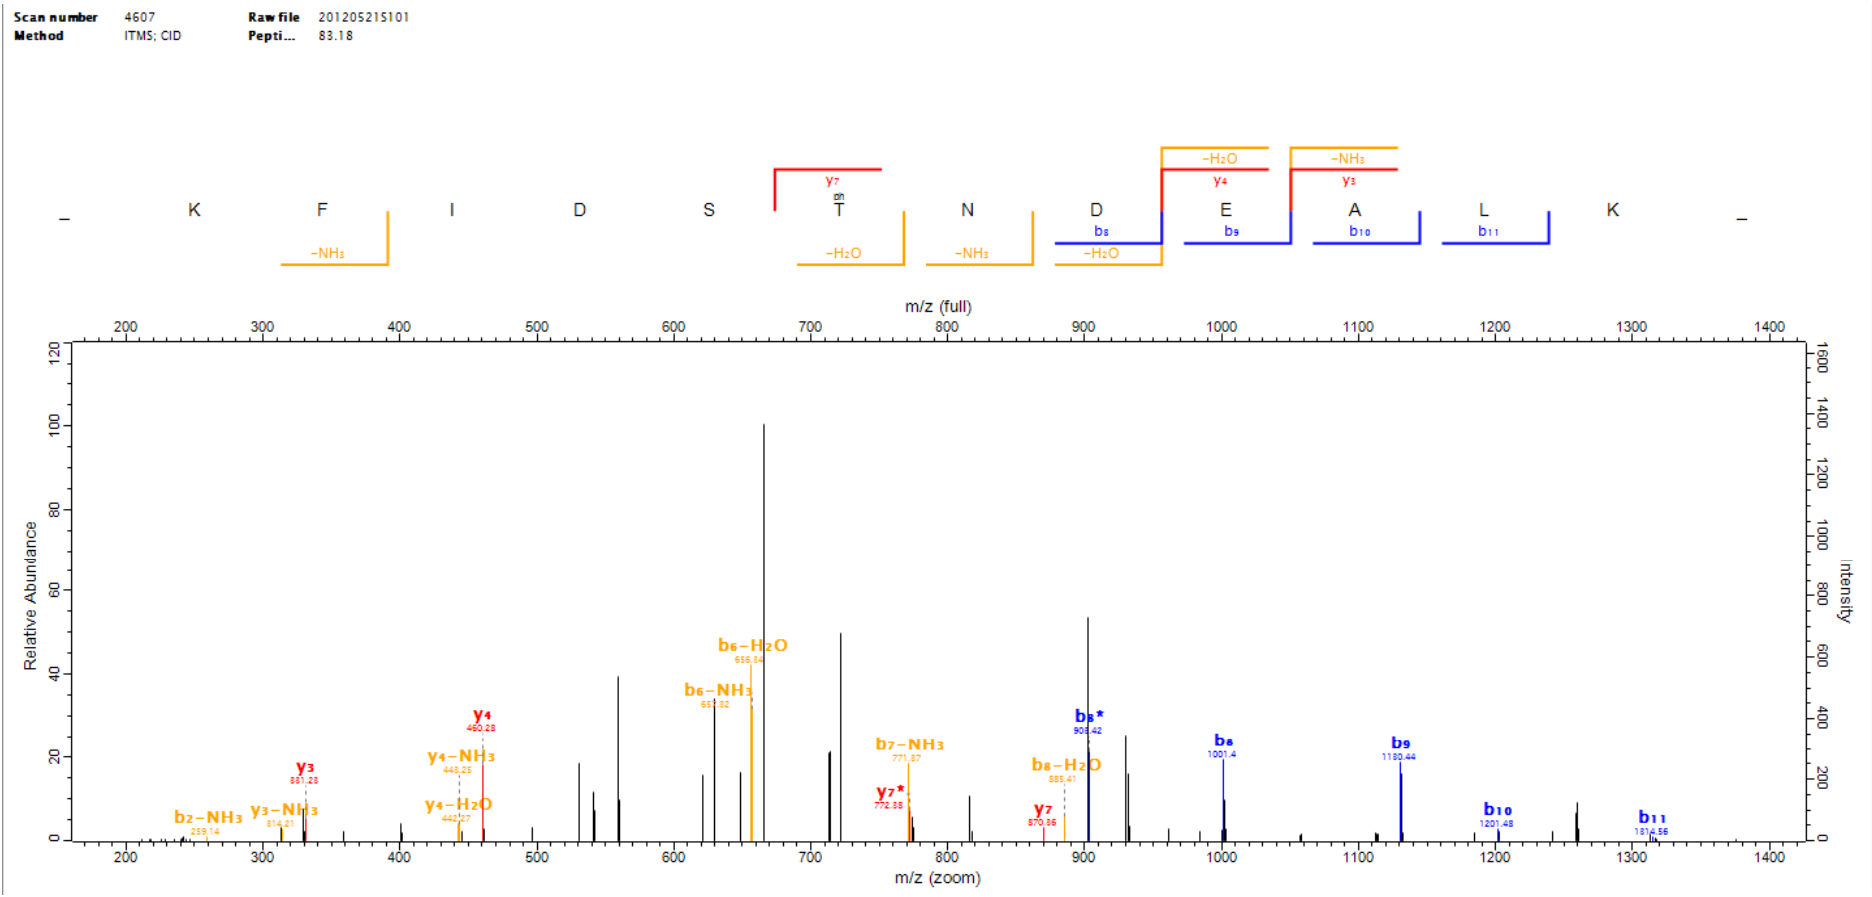

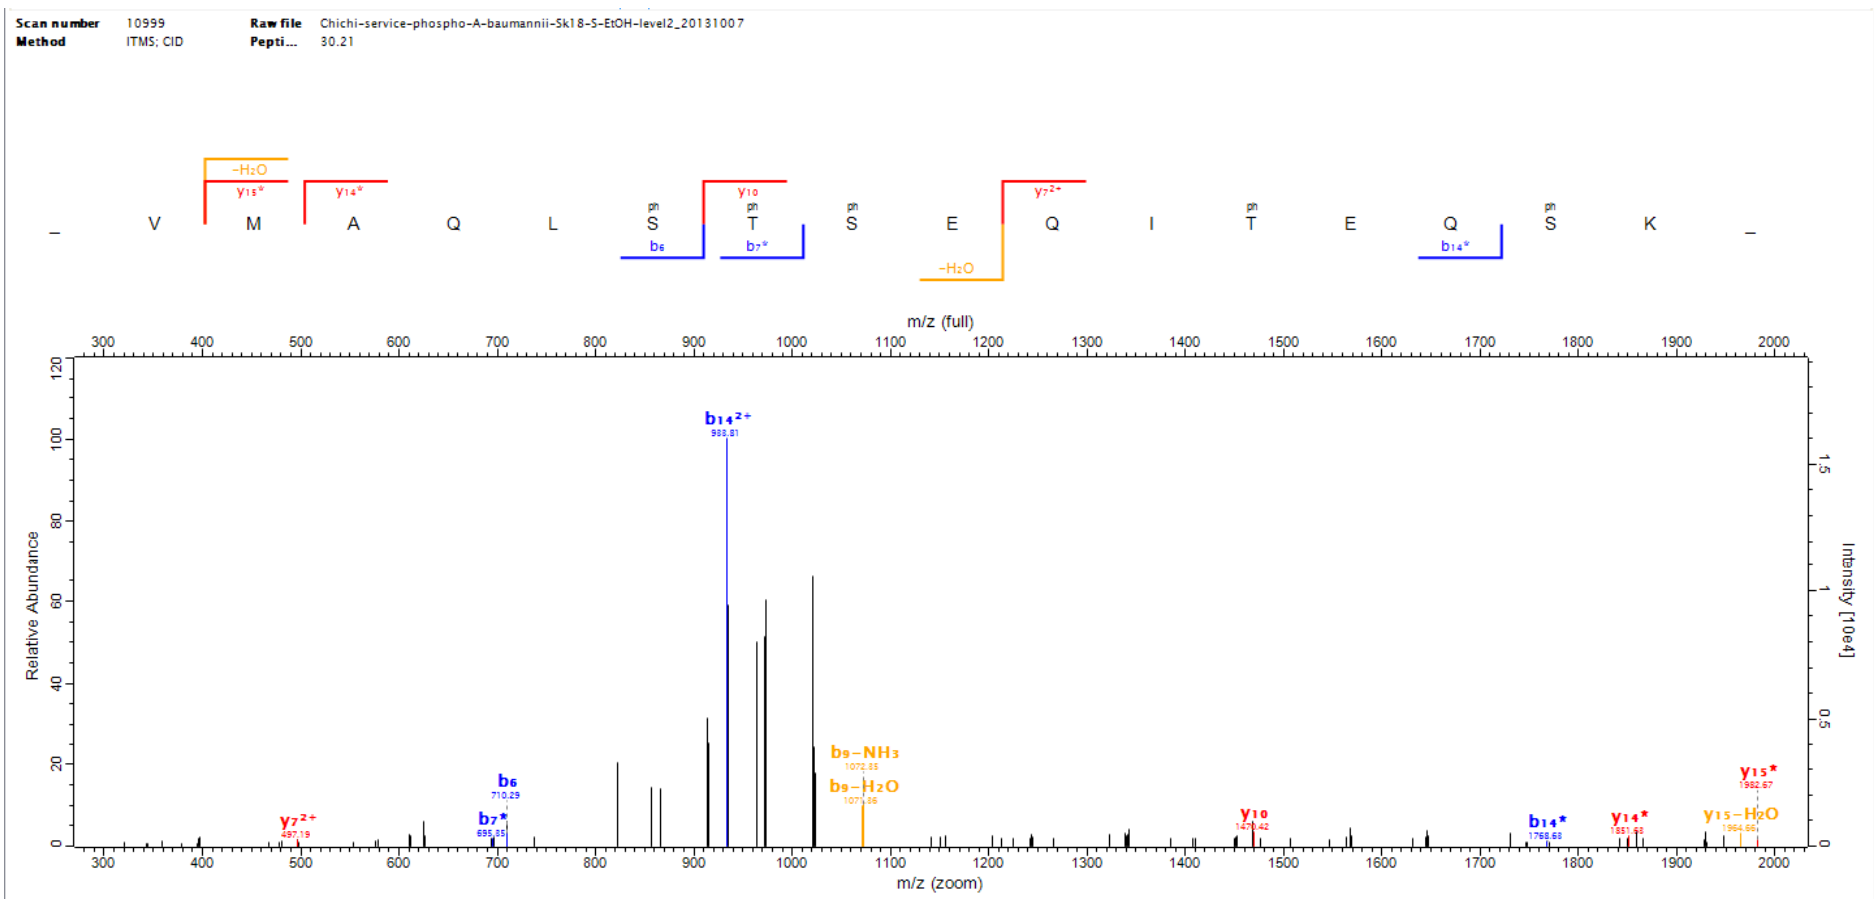

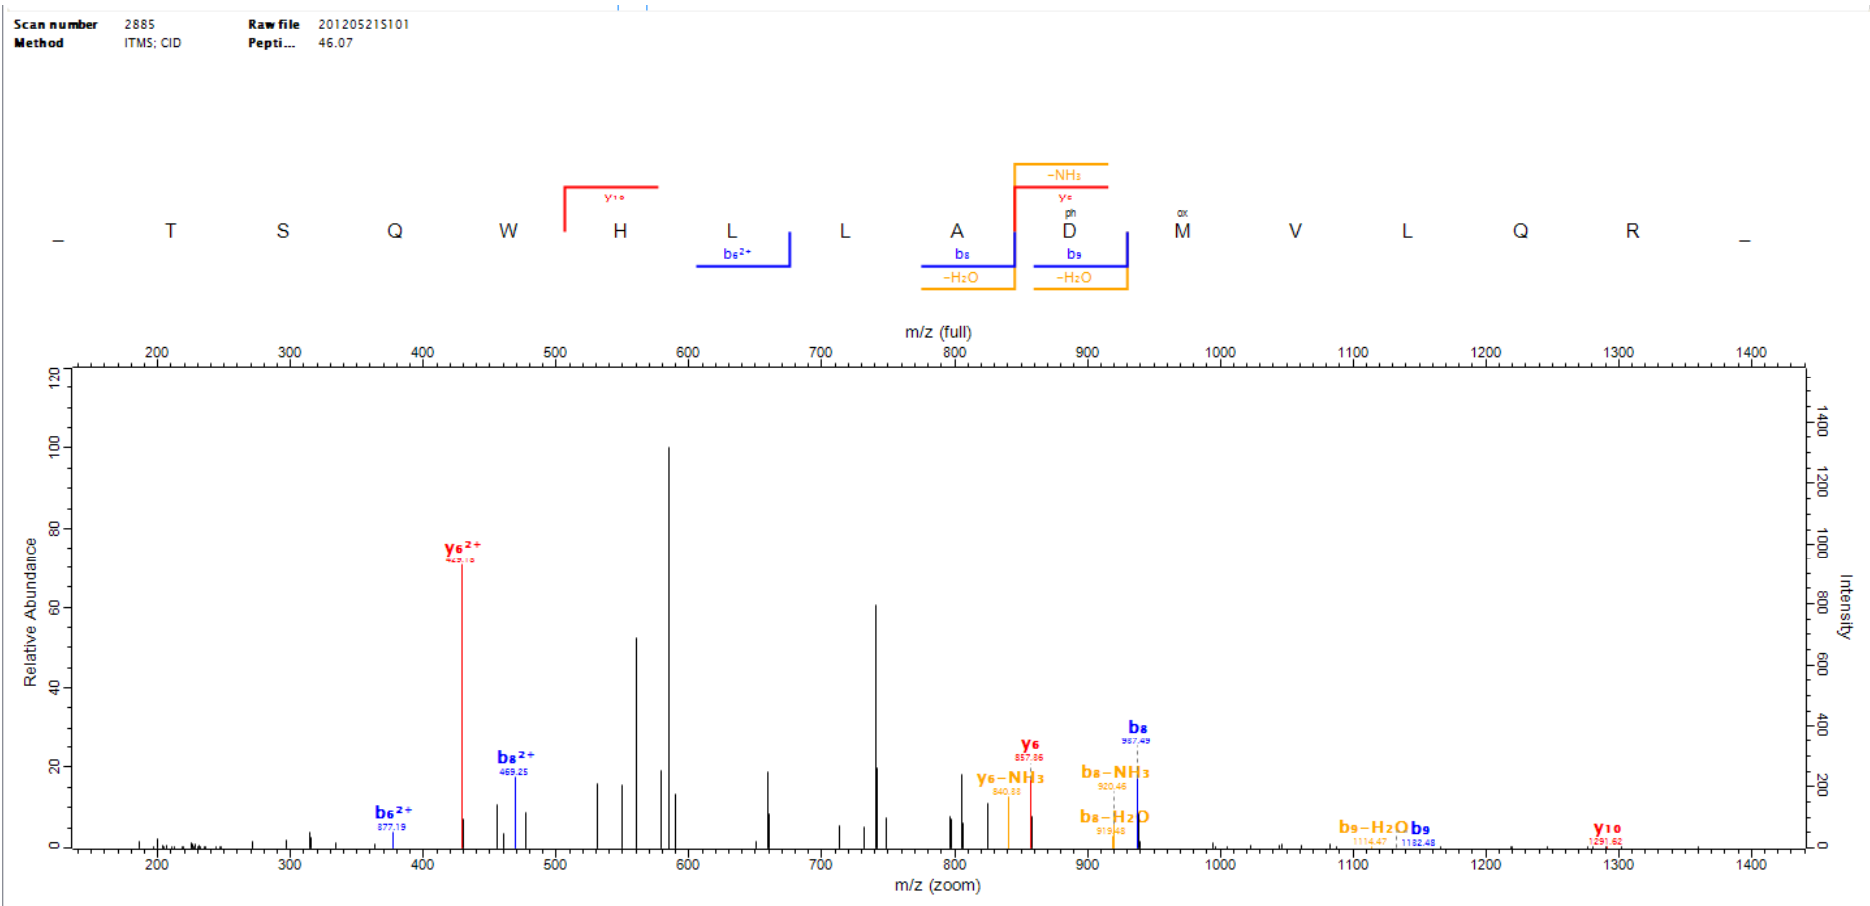

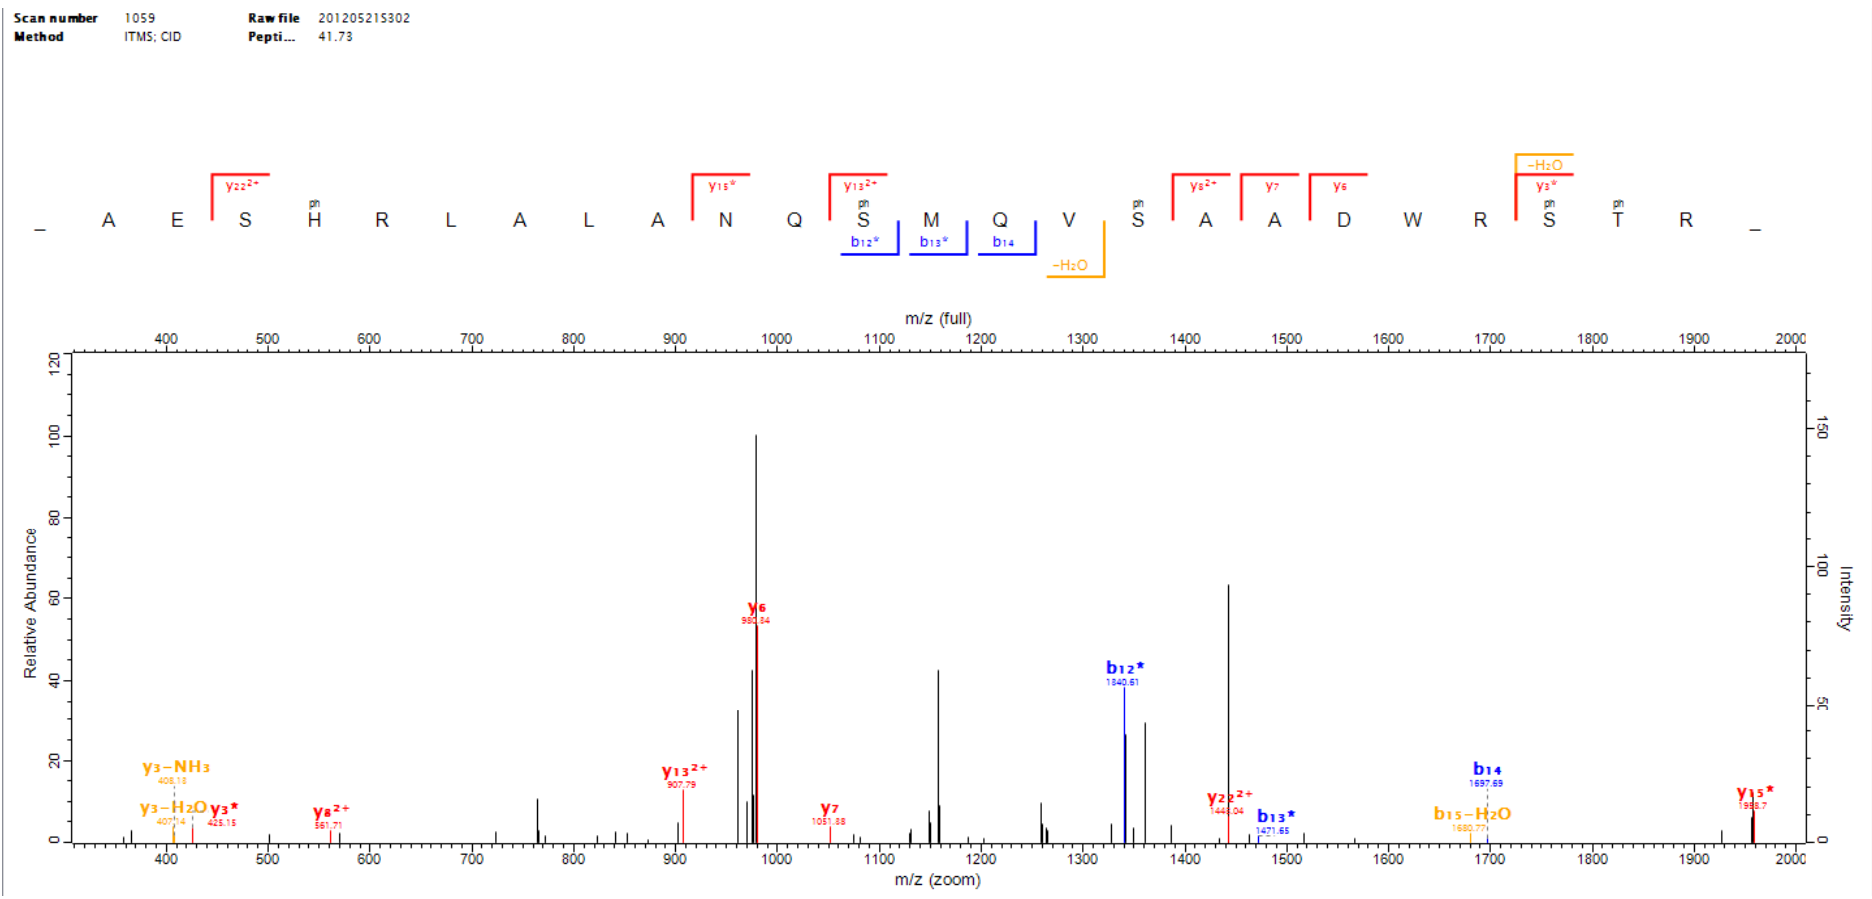

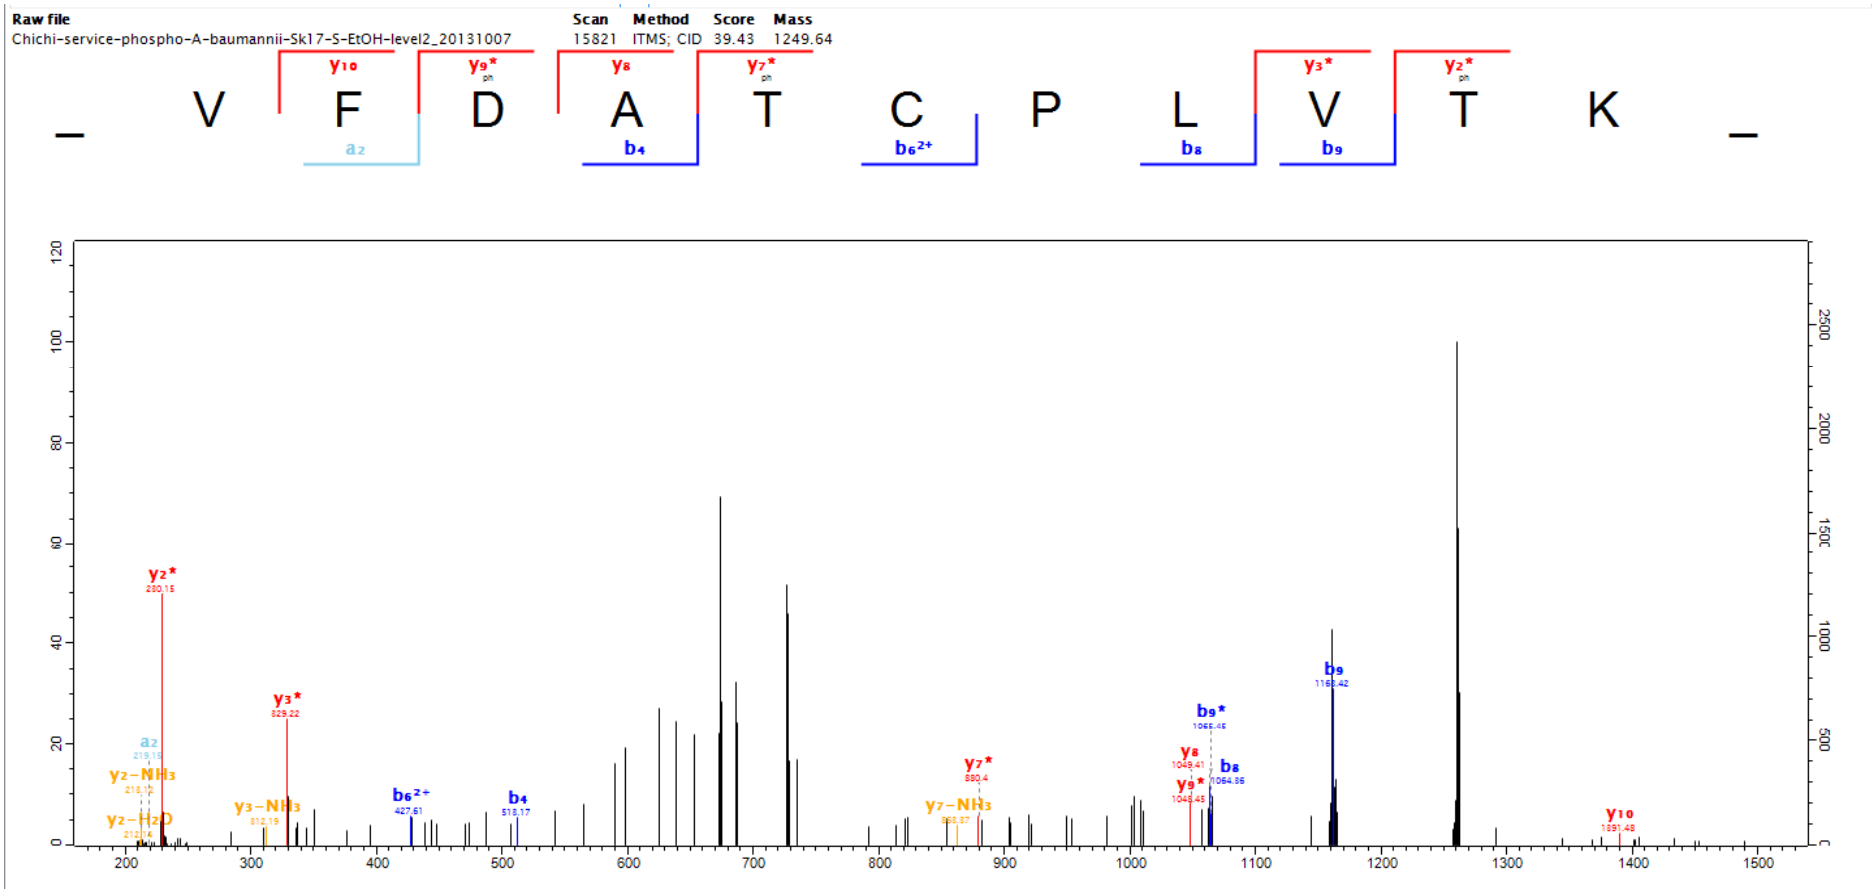

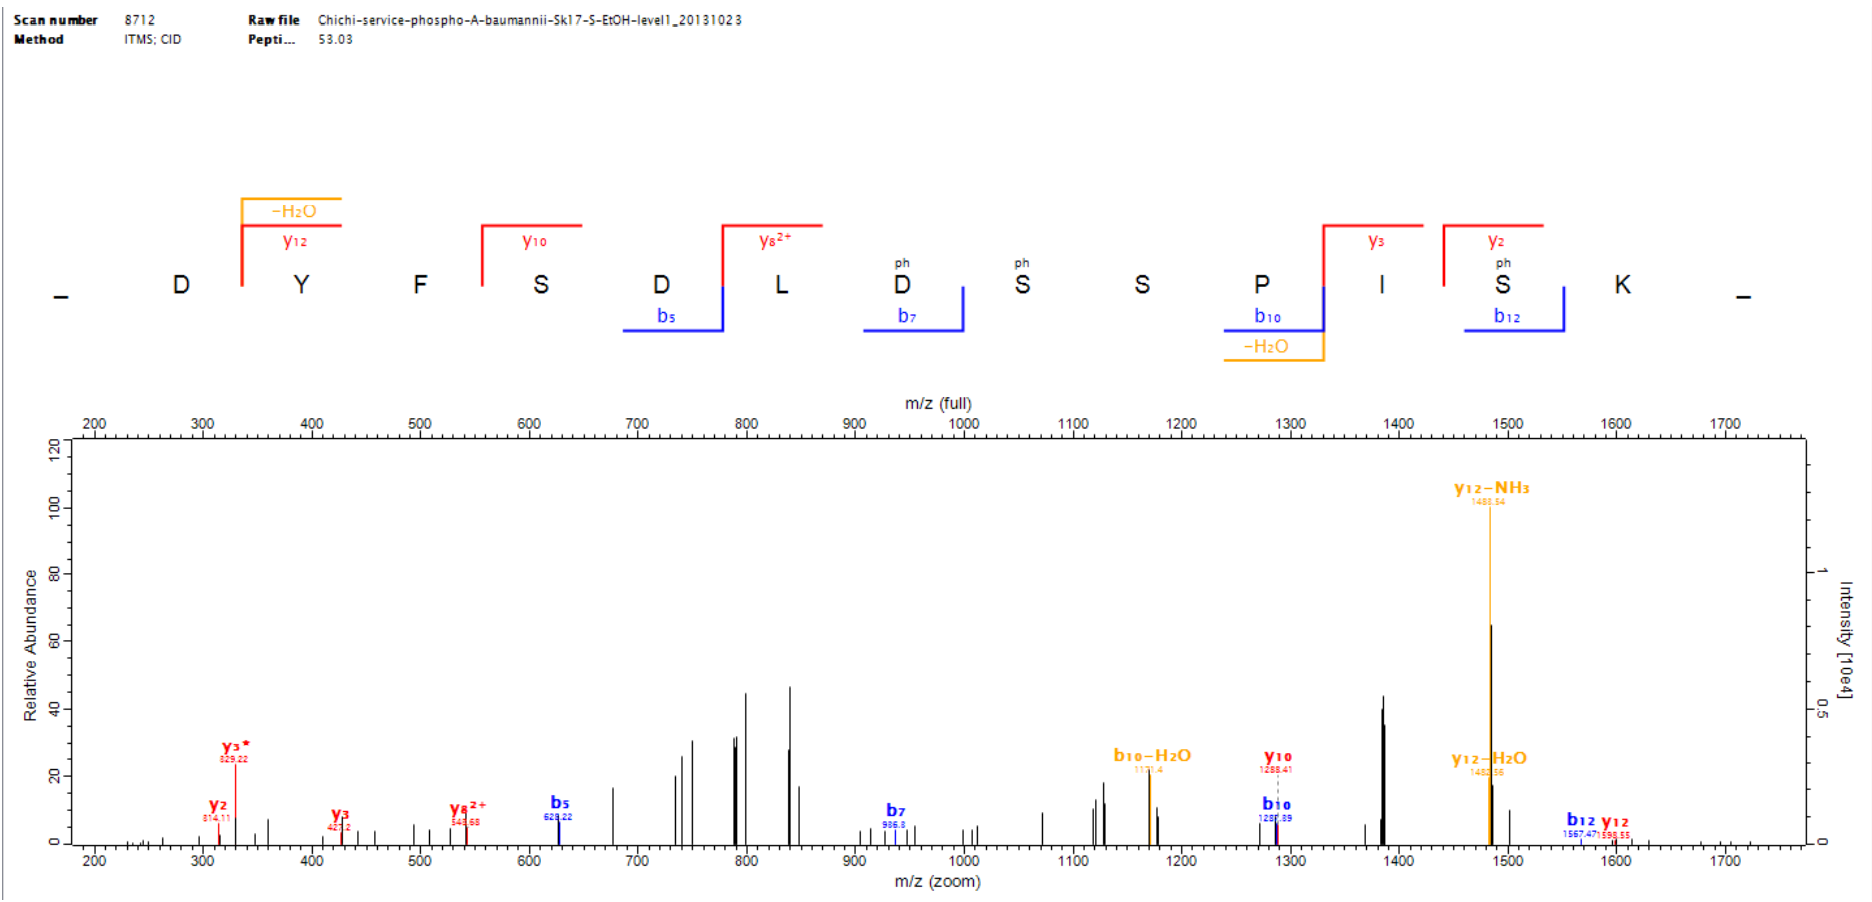

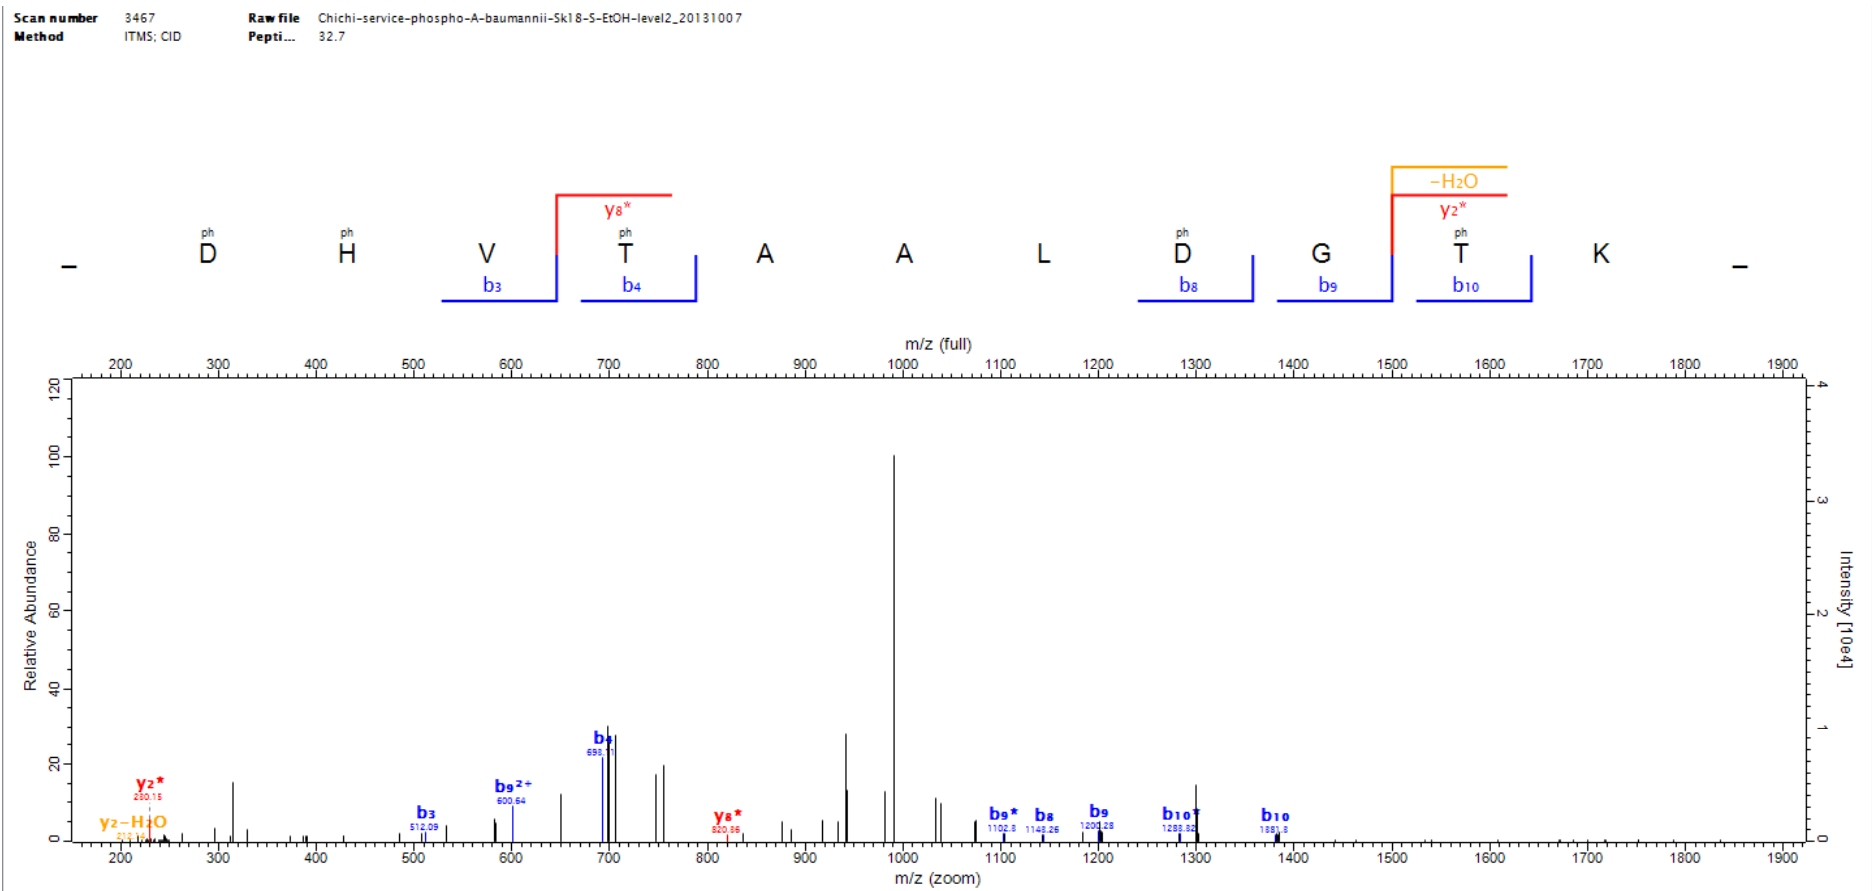



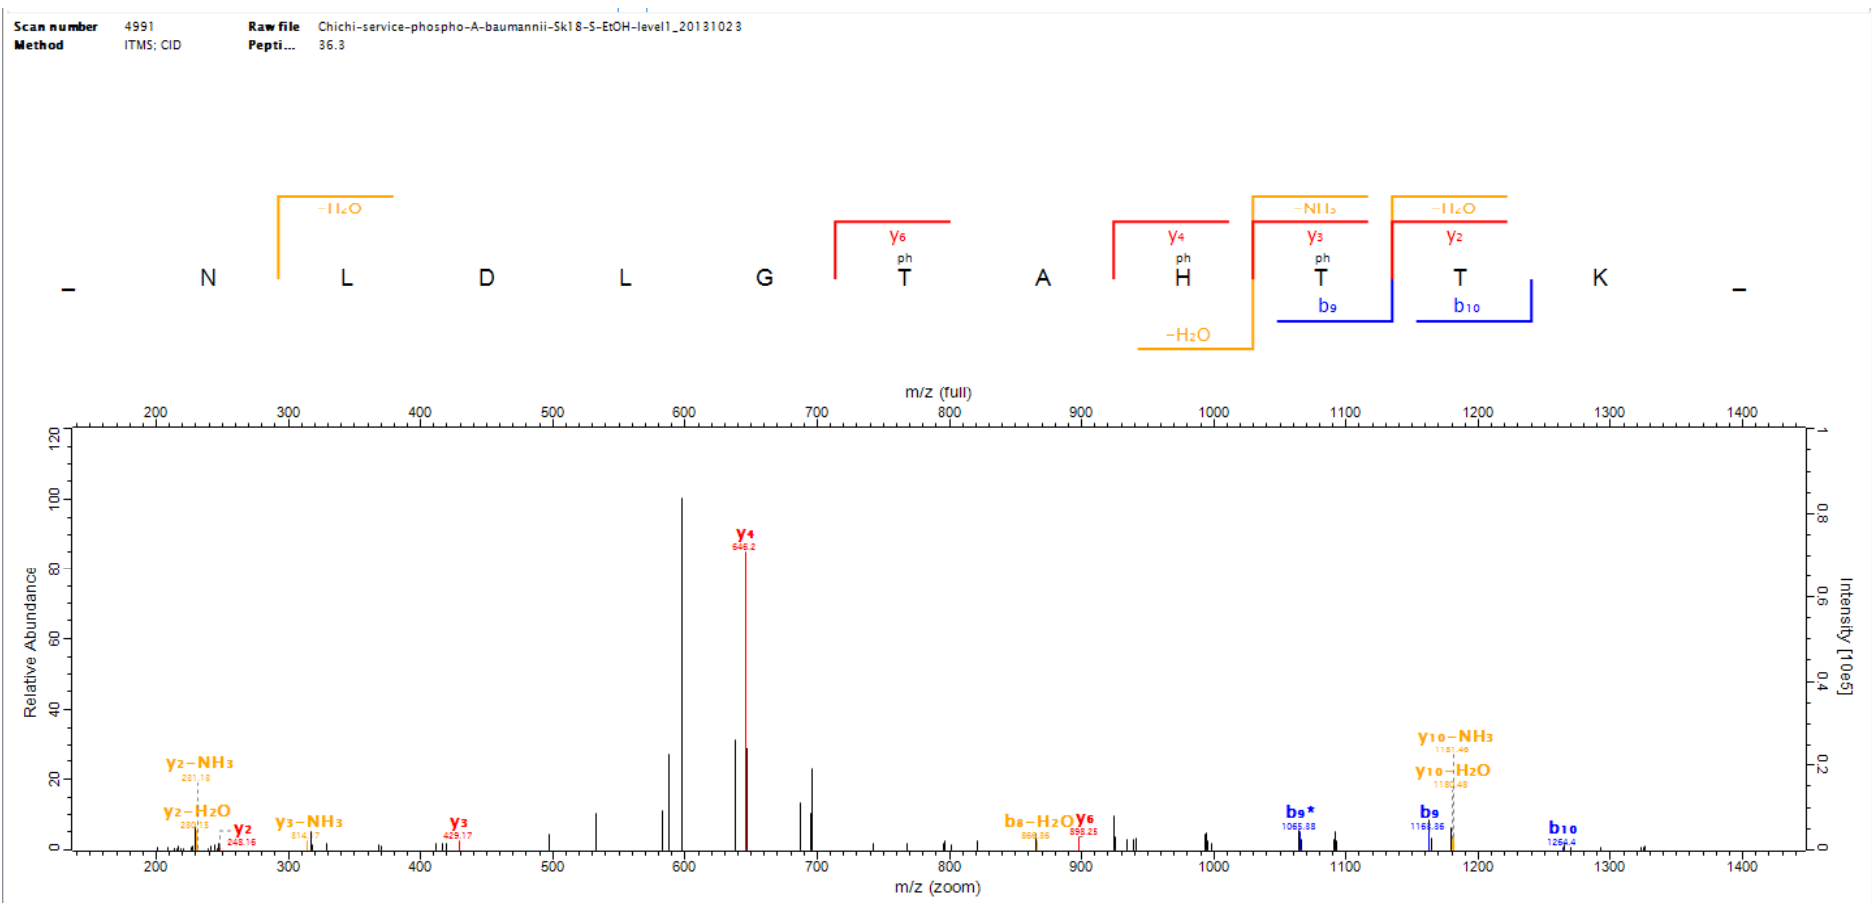

243

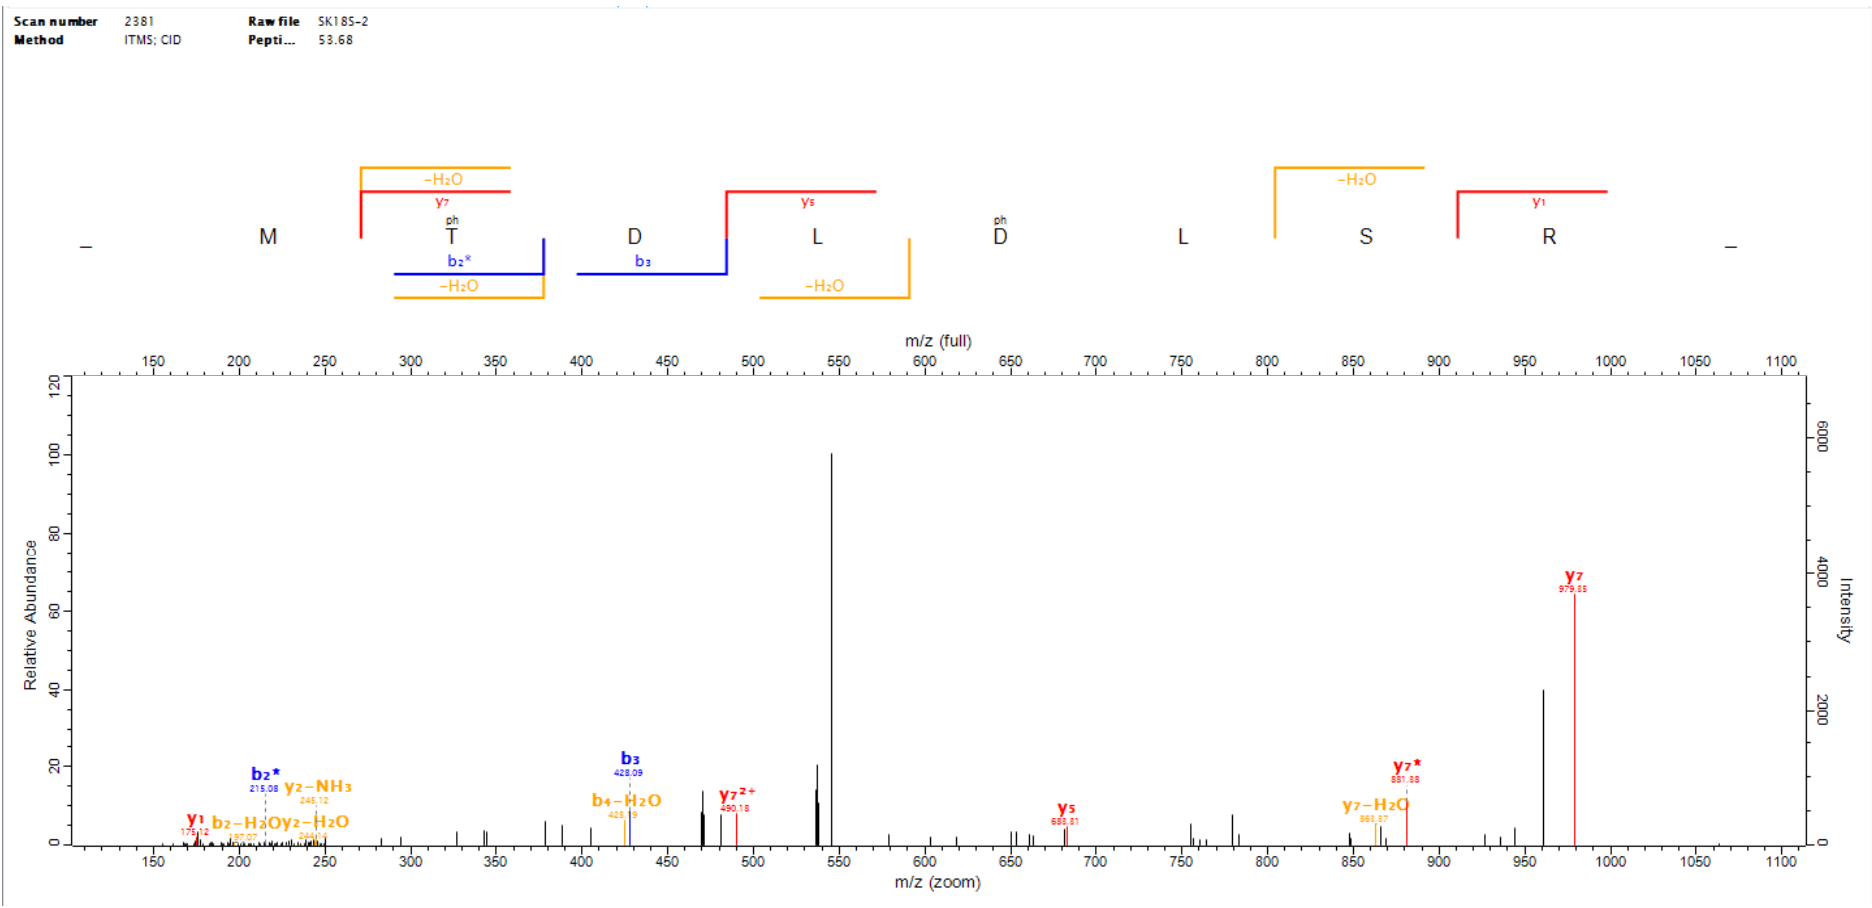

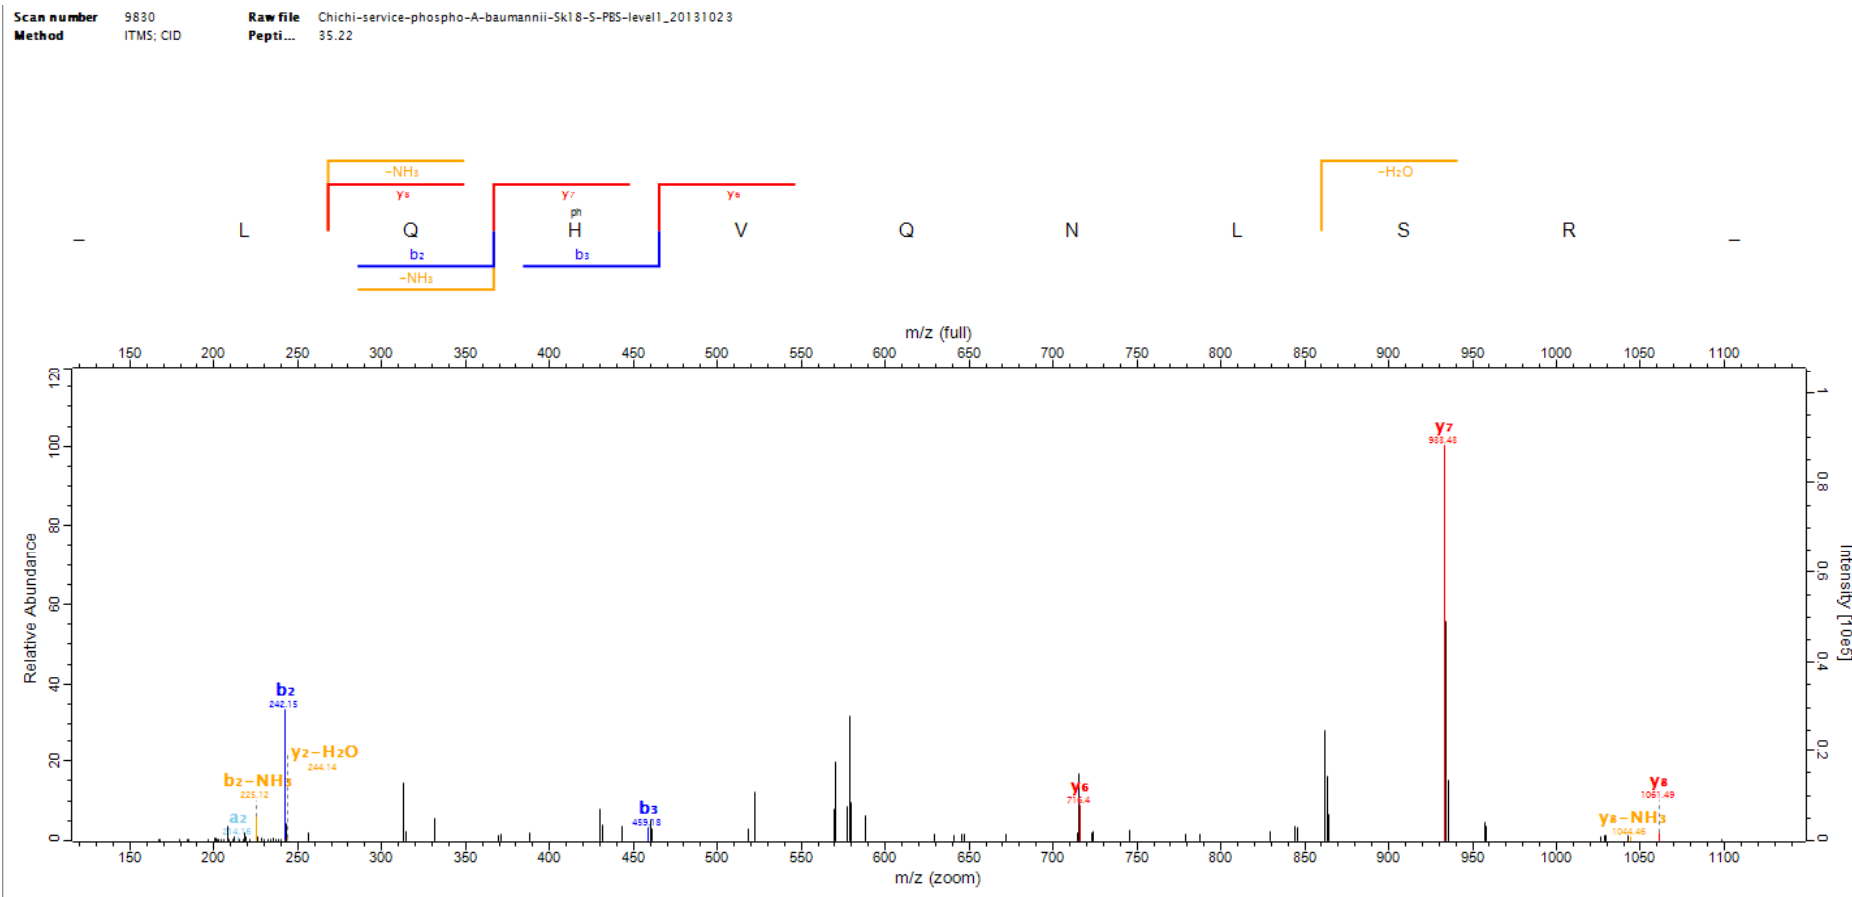

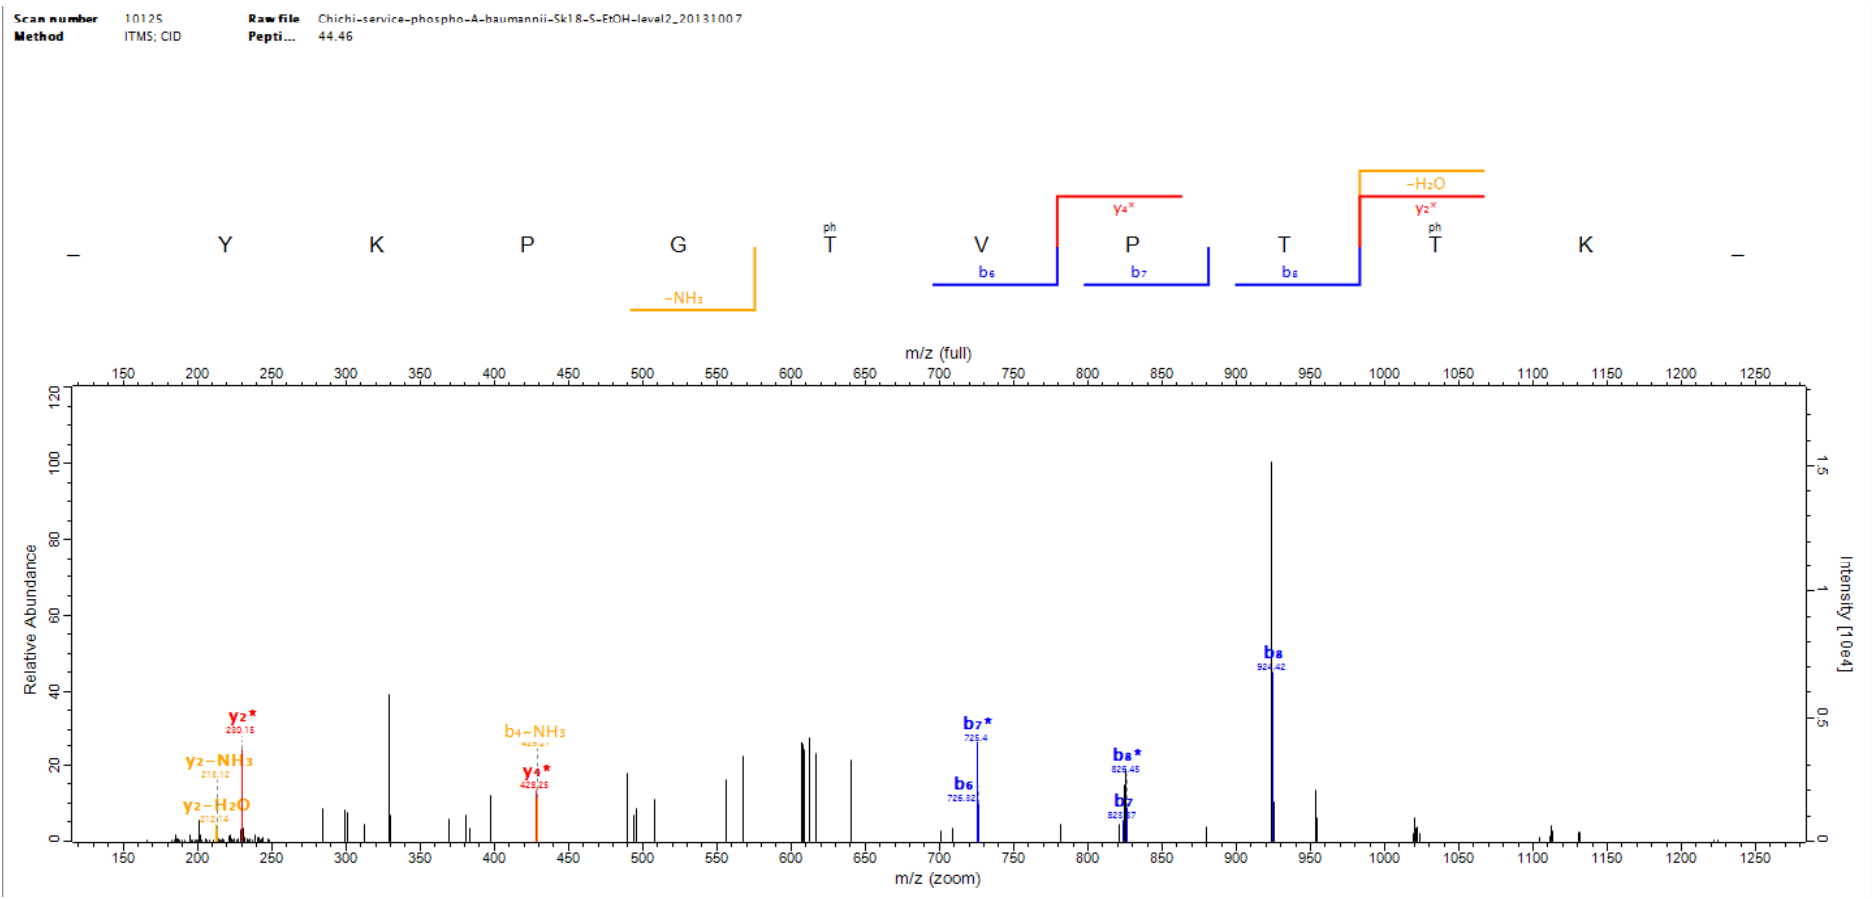

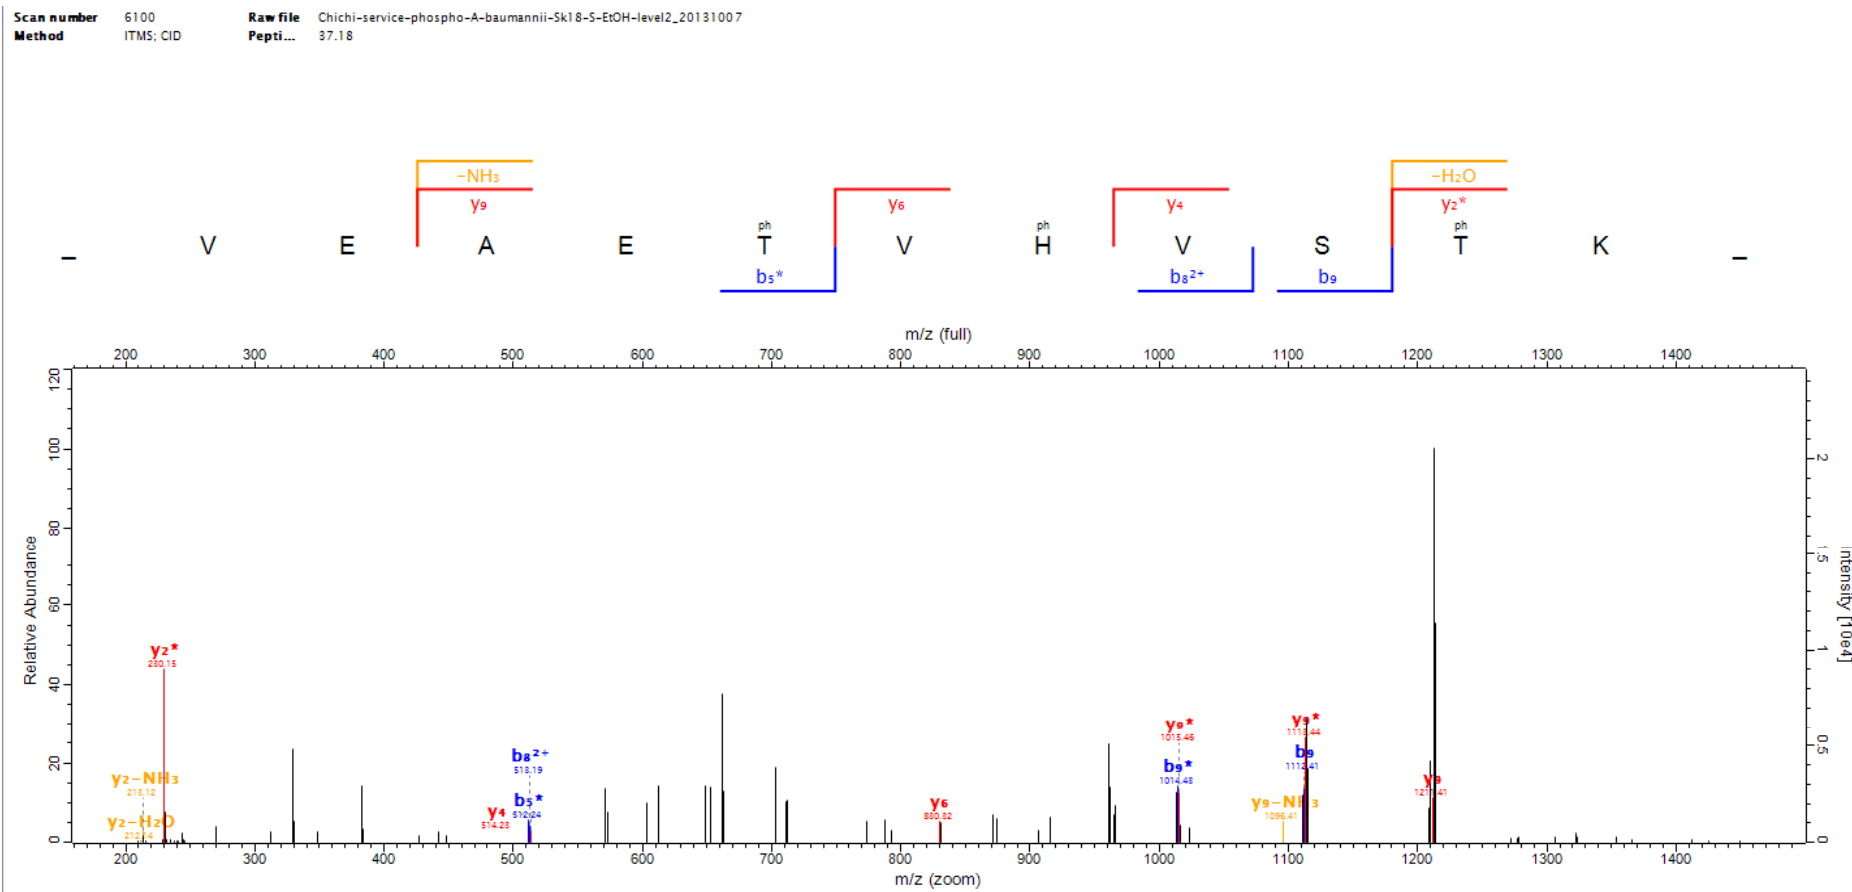

247

Raw file Scan Method Score Mass  
175-5 5316 ITMS; CID 35.54 1189.58

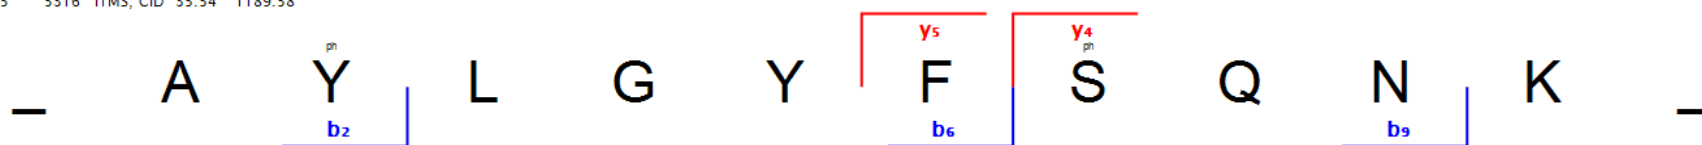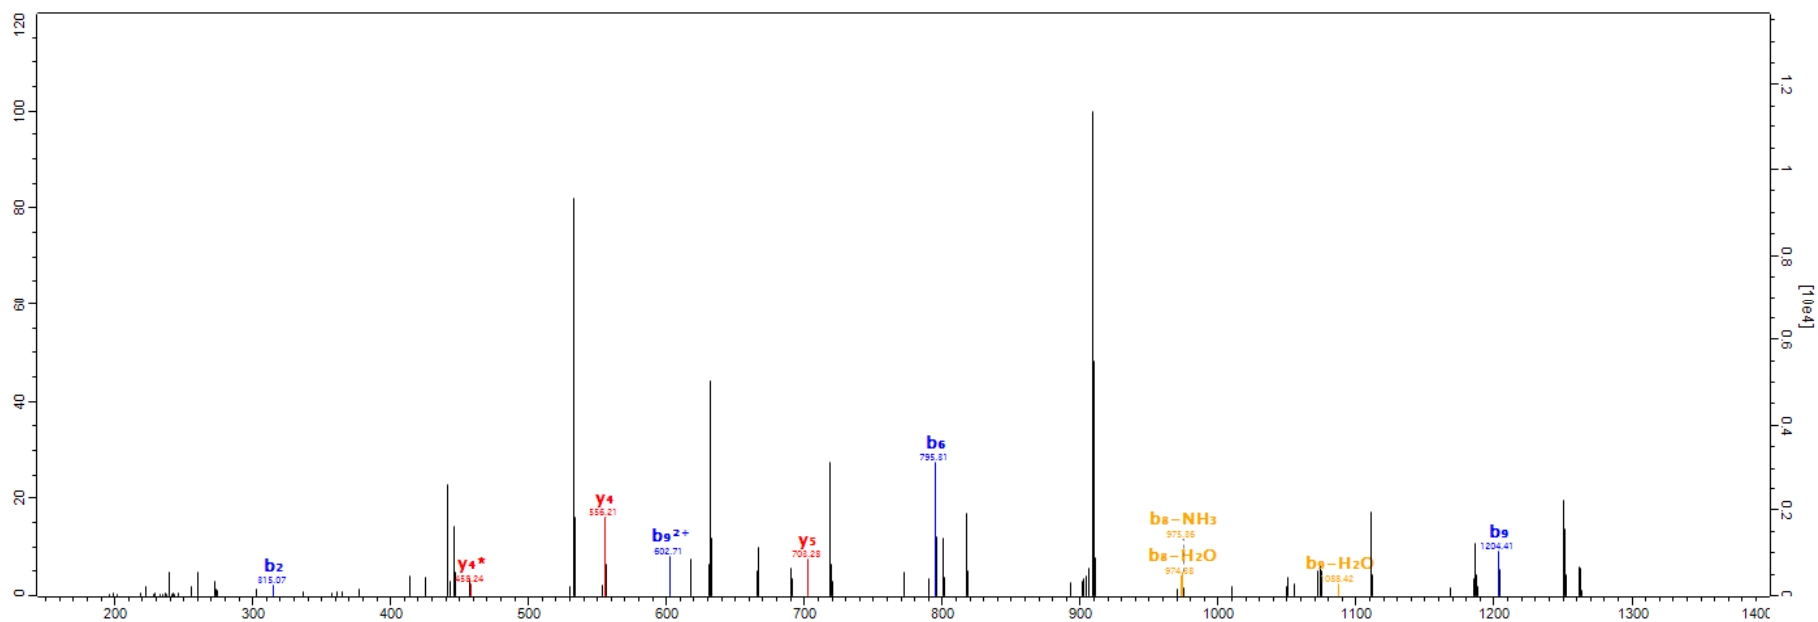

248

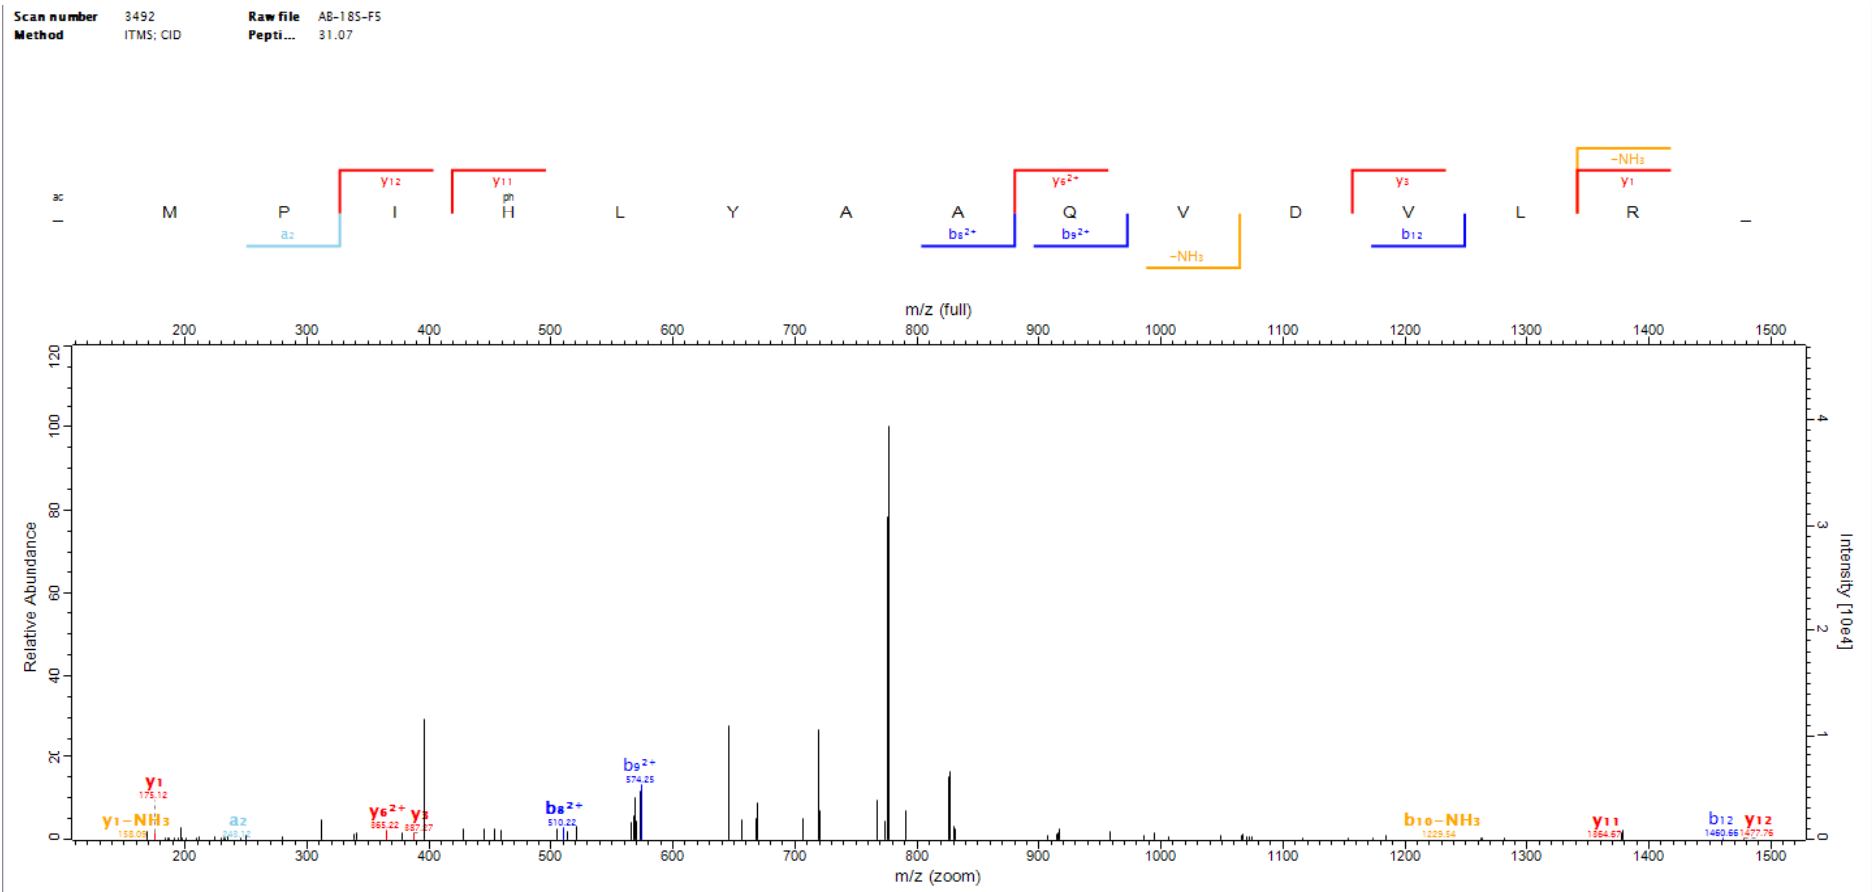

Supplement: 10.1074_M115.051052_mcp.M115.051052-2.pdf [file 10.1074_M115.051052_mcp.M115.051052-2.pdf]
