# Supplementary material
Source: PubMed Central journal article supplement (PMC4762518)

**Supplemental Figure S2. MS/MS spectra of all identified phosphopeptides and phosphosites from *A. baumannii* strain SK17-R.** Annotated MS/MS spectra of all detected phosphopeptides were obtained and then exported after the database search. Data extraction and processing were done using MaxQuant. The y-ions are shown in red and the b-ions in blue. Losses of the neutral chemical groups, H<sub>2</sub>O, or NH<sub>3</sub>, from fragment ions are shown in orange. Residues marked with “ph” are those favored for phosphorylation.

1

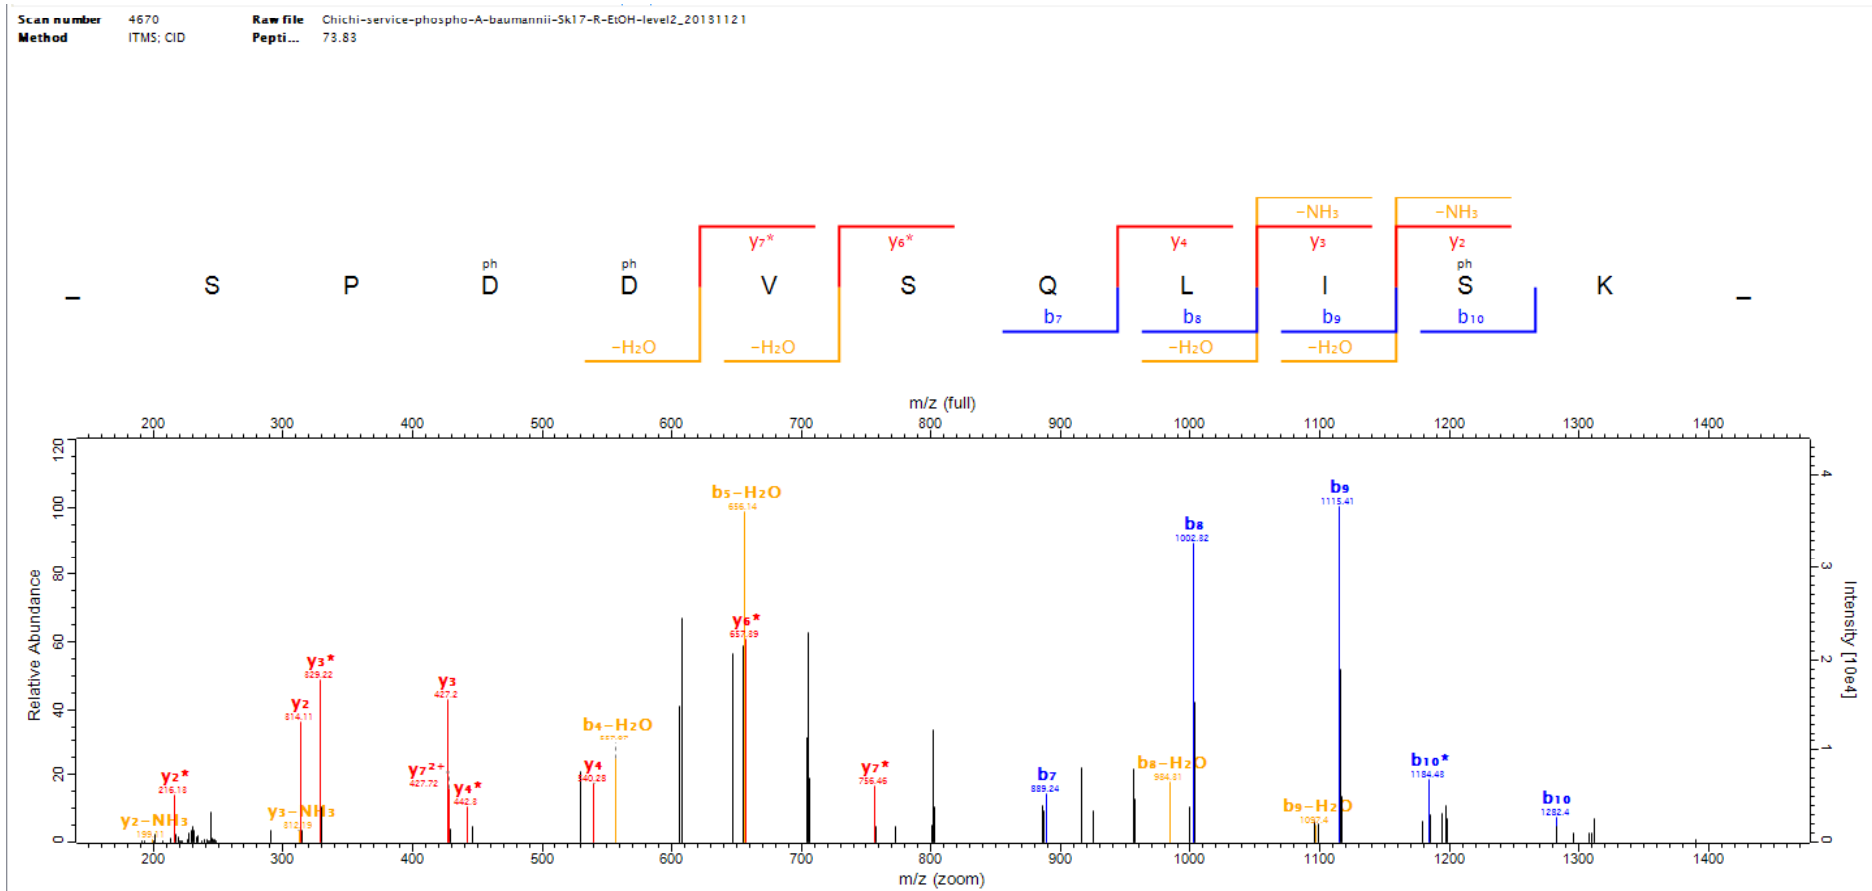

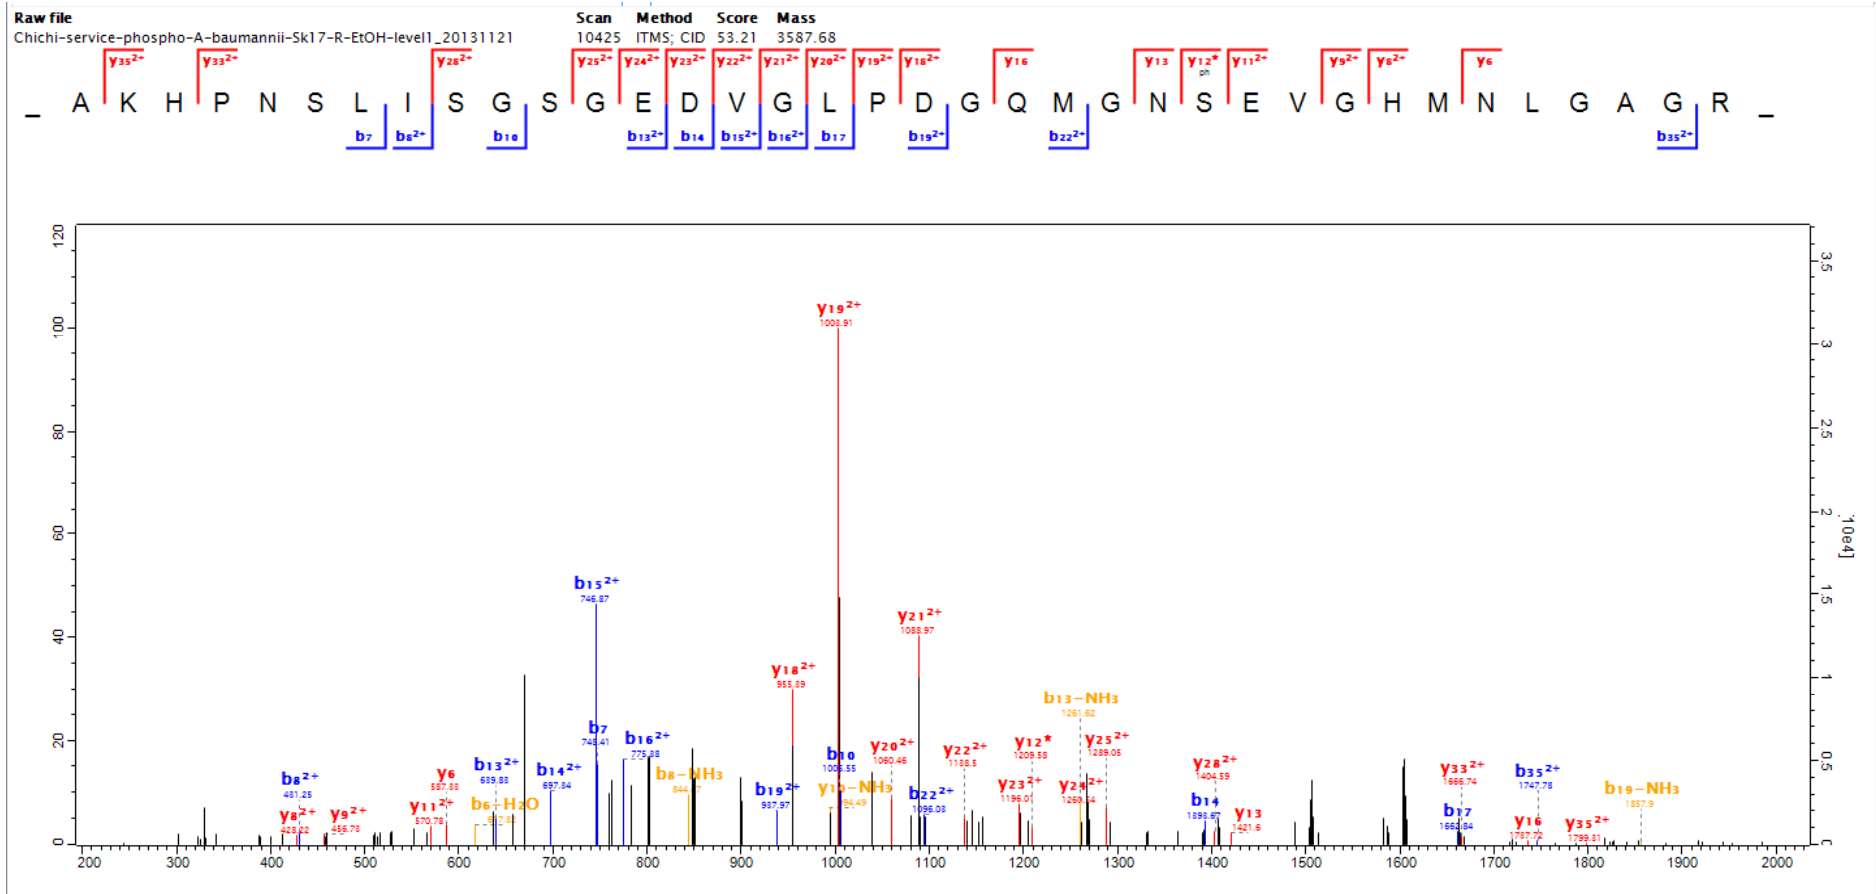

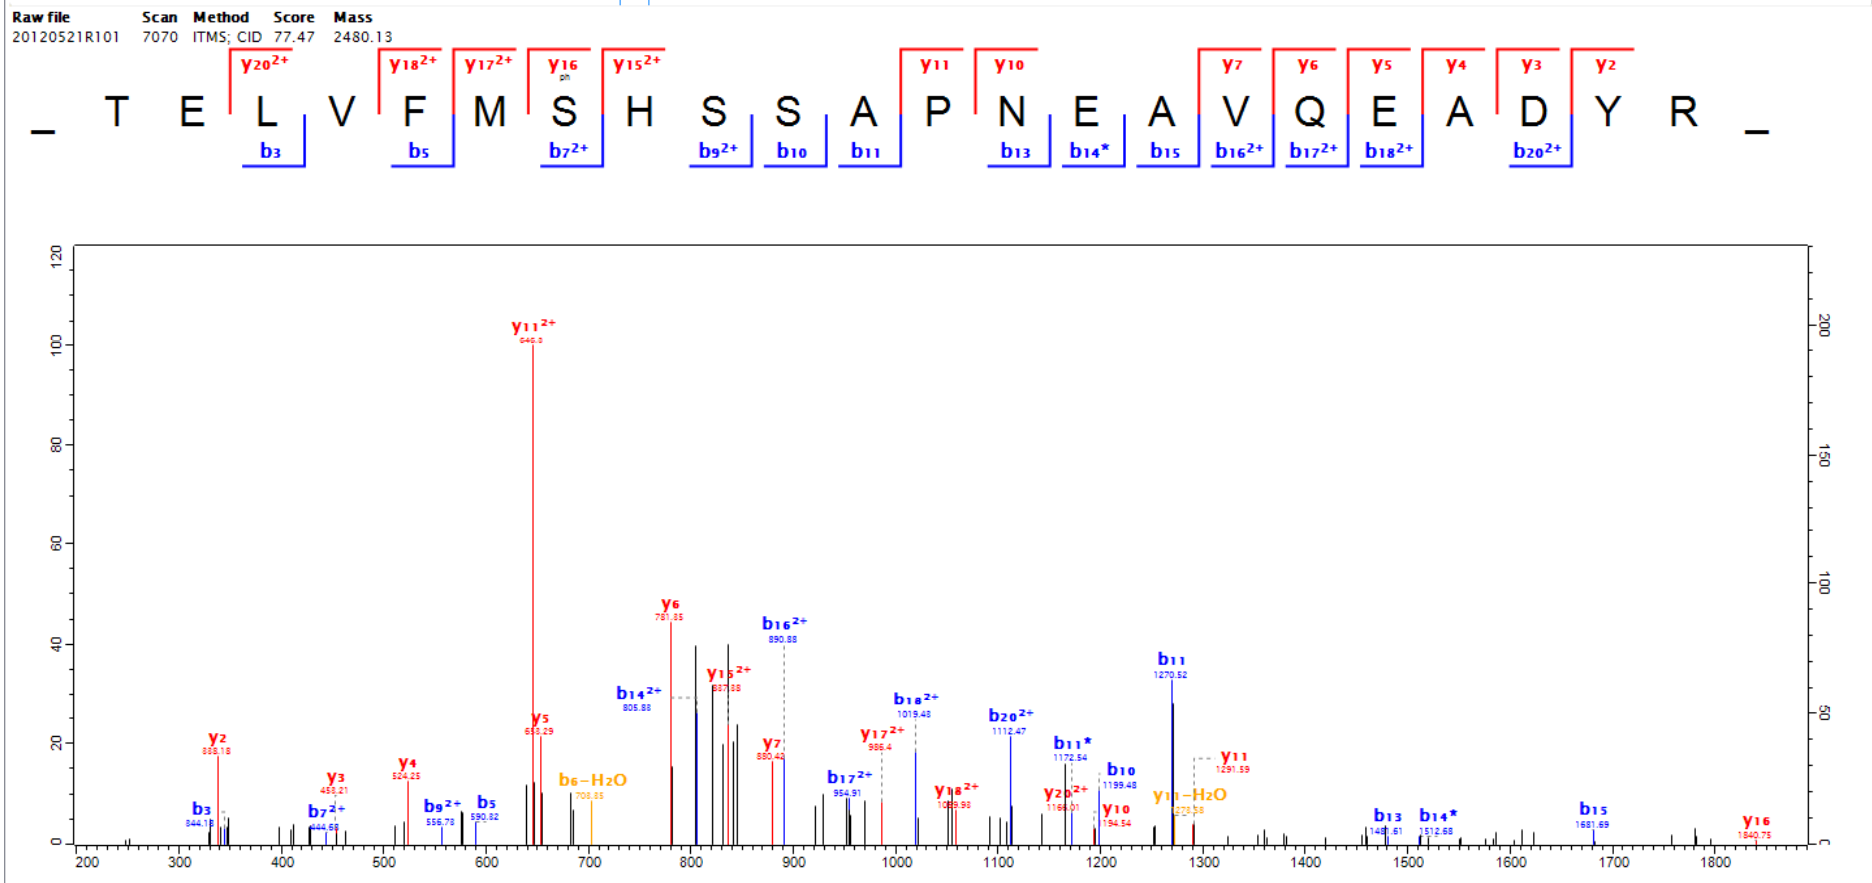

4-1

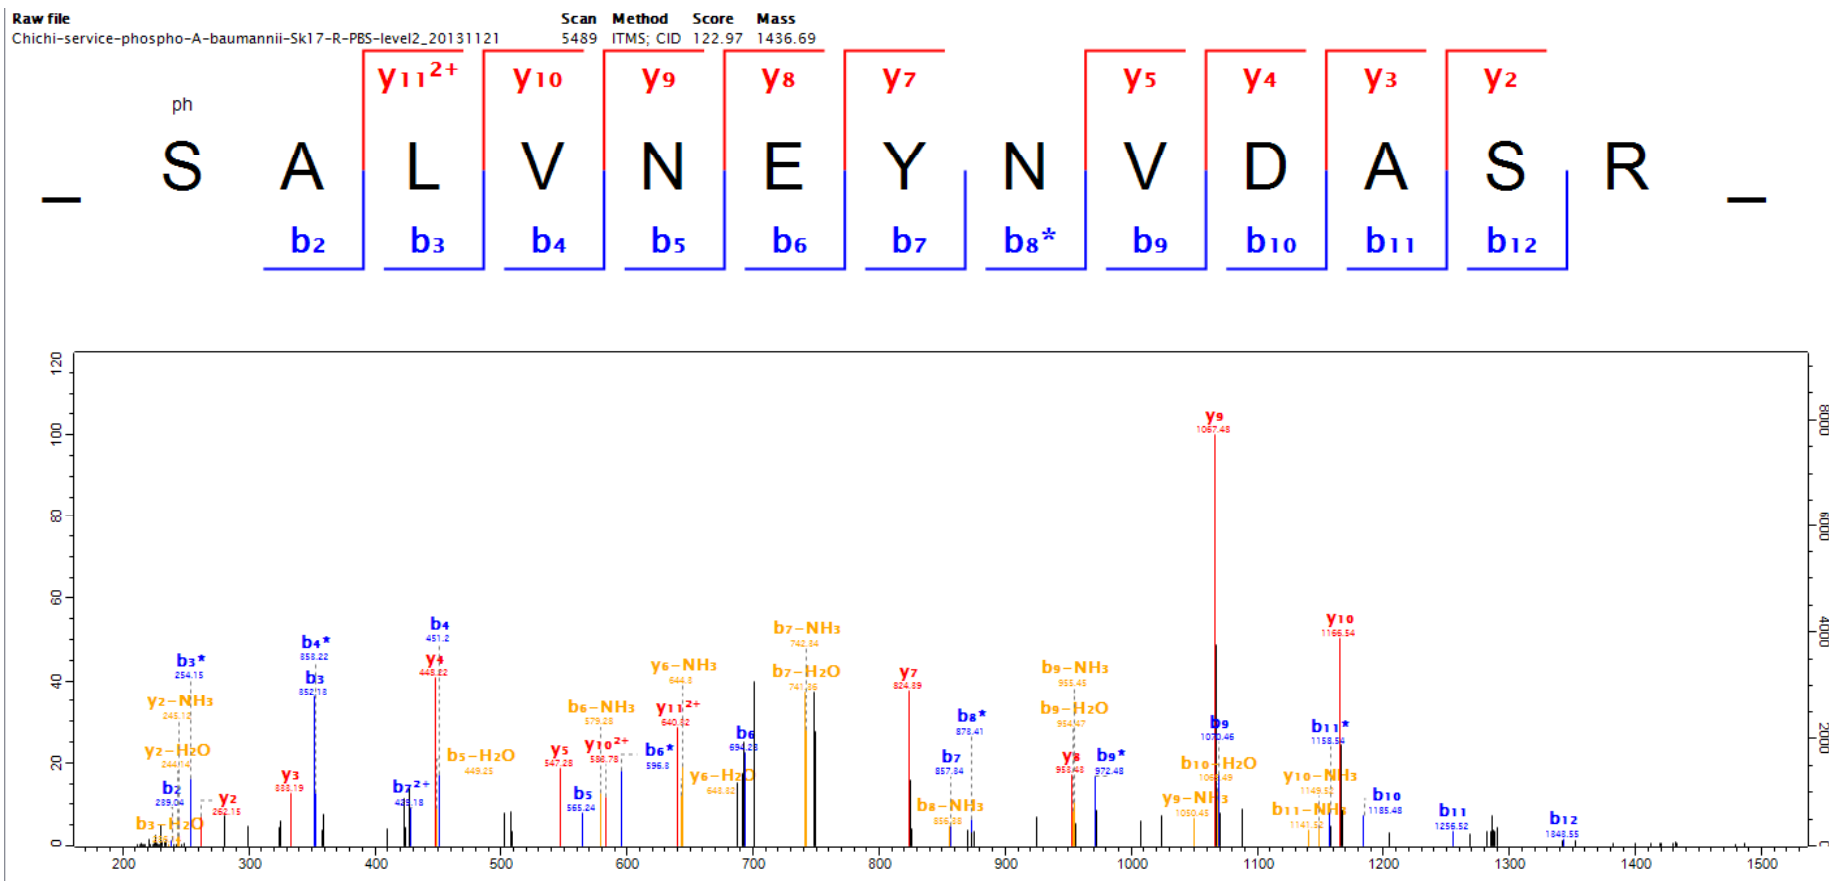

4-2

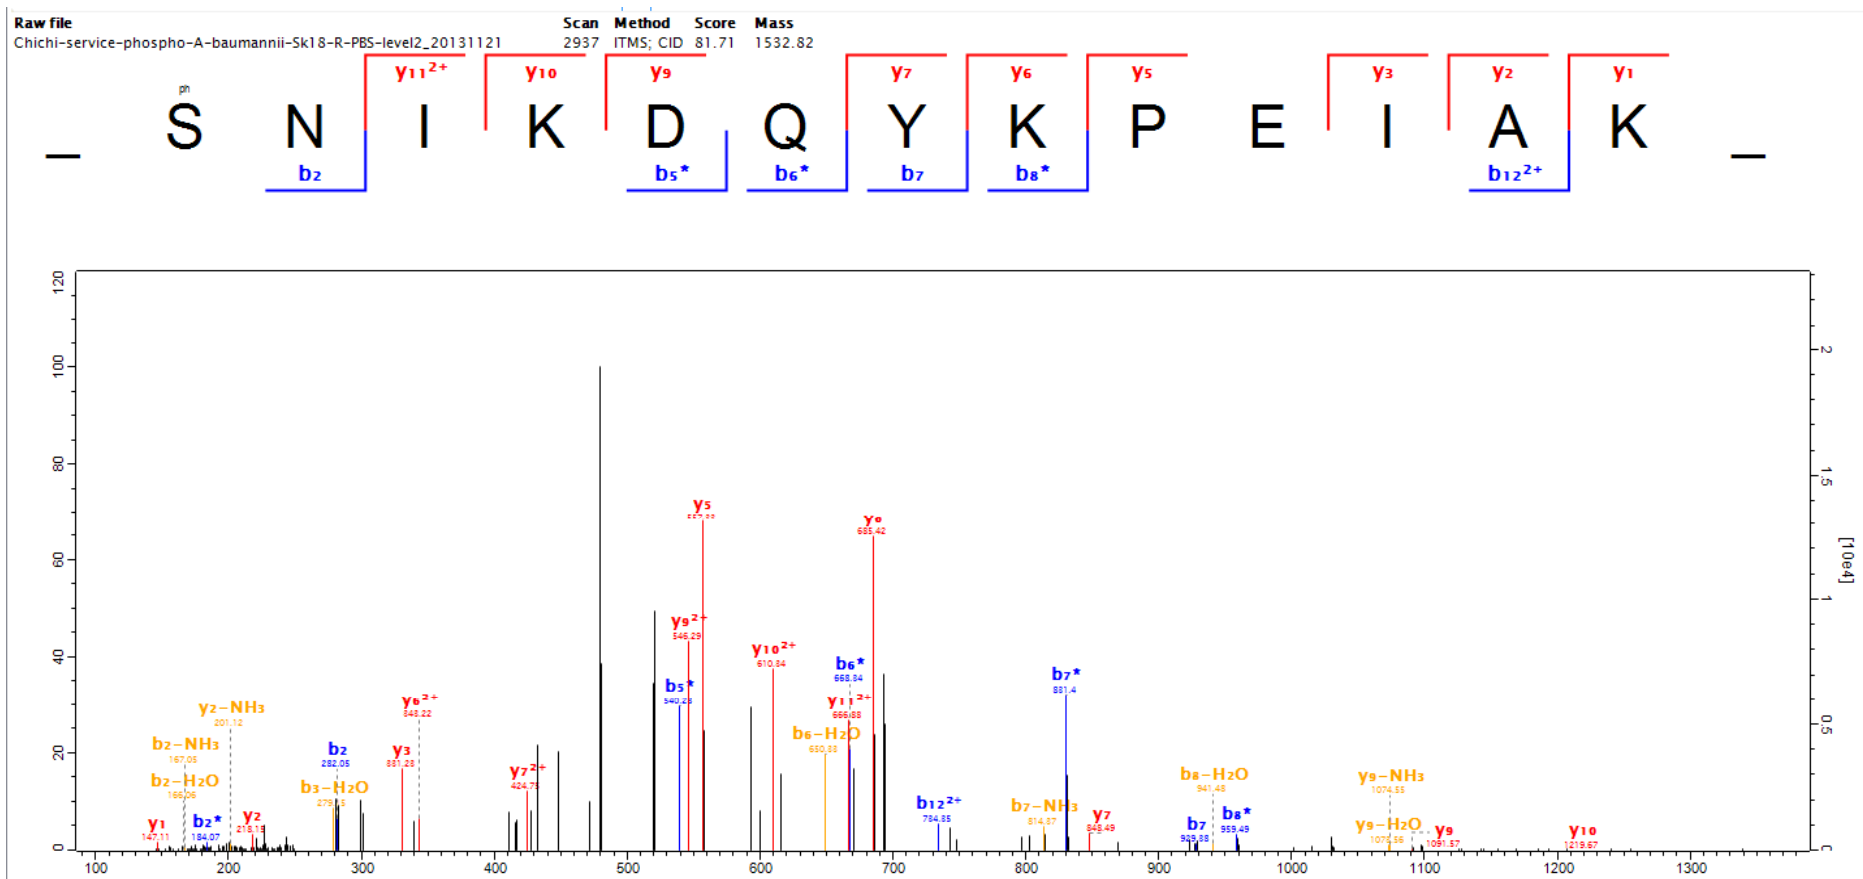

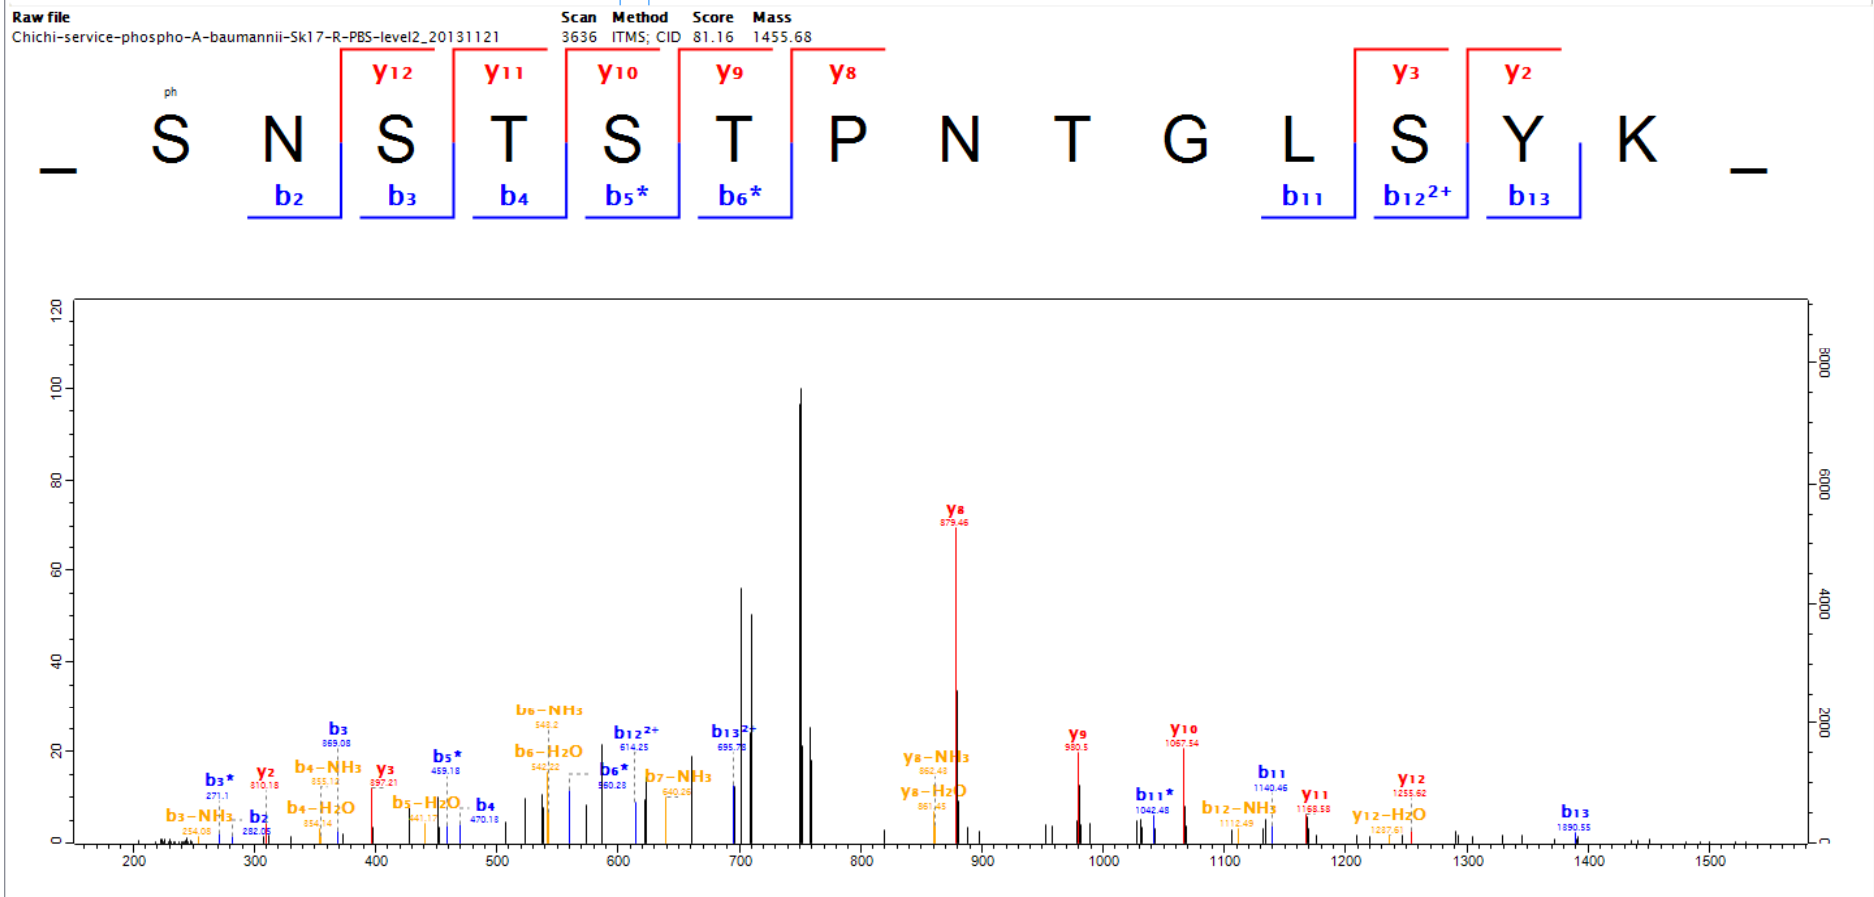

6-1

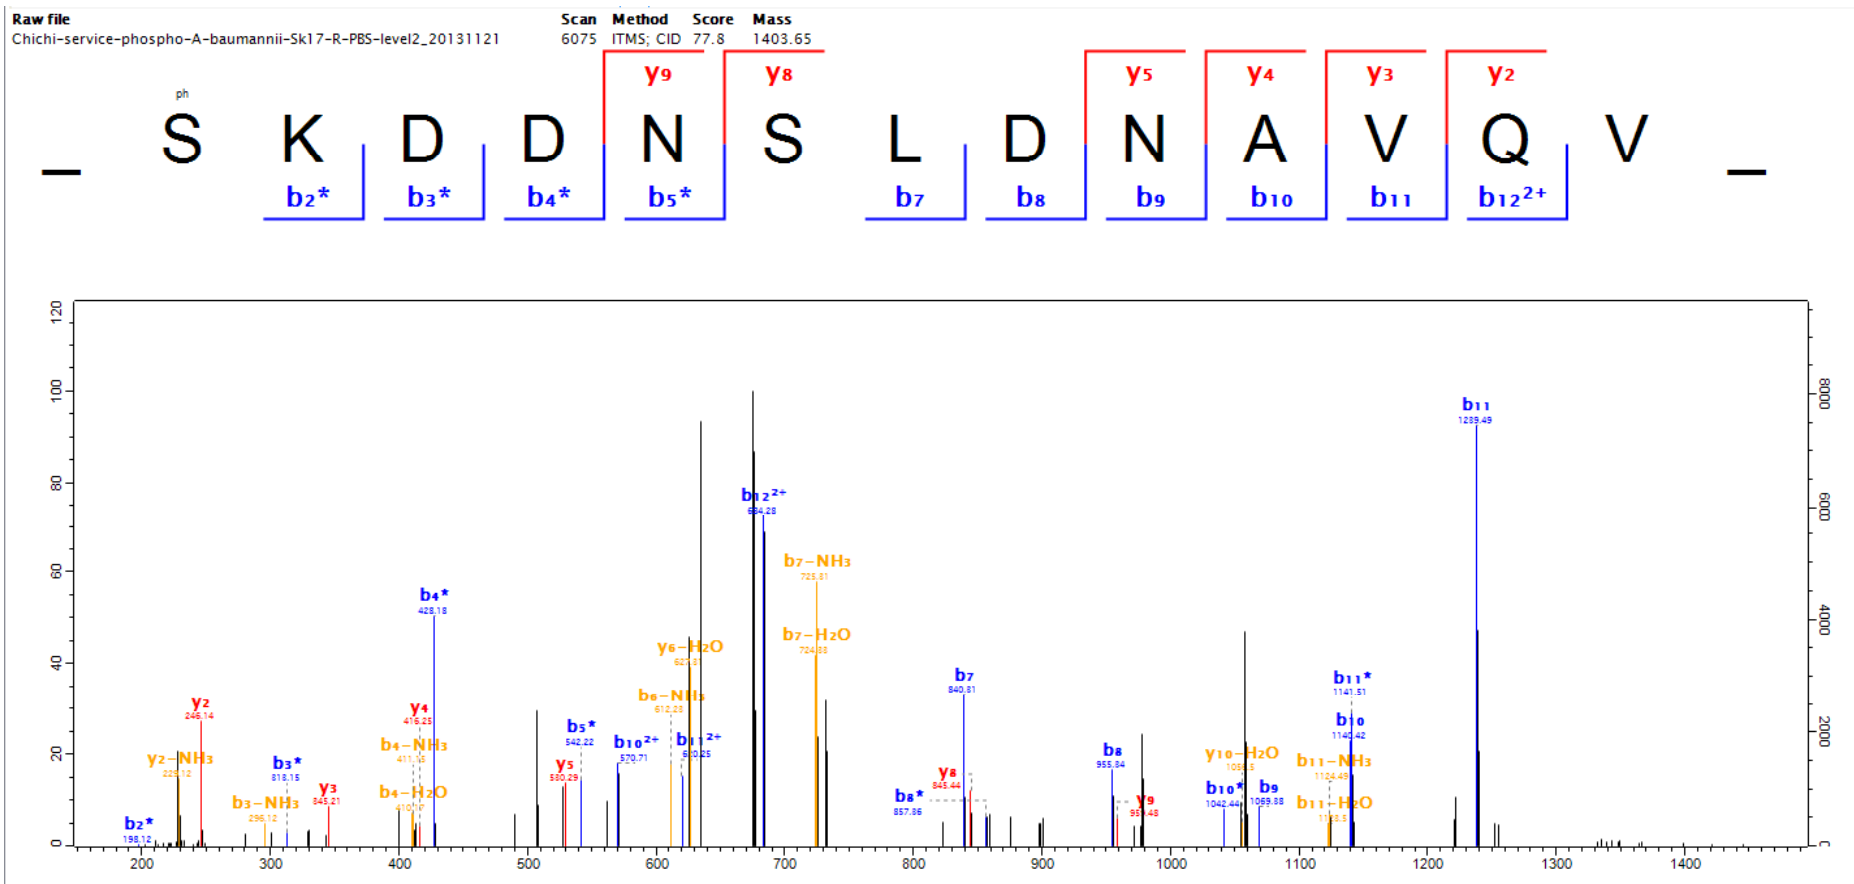

6-2

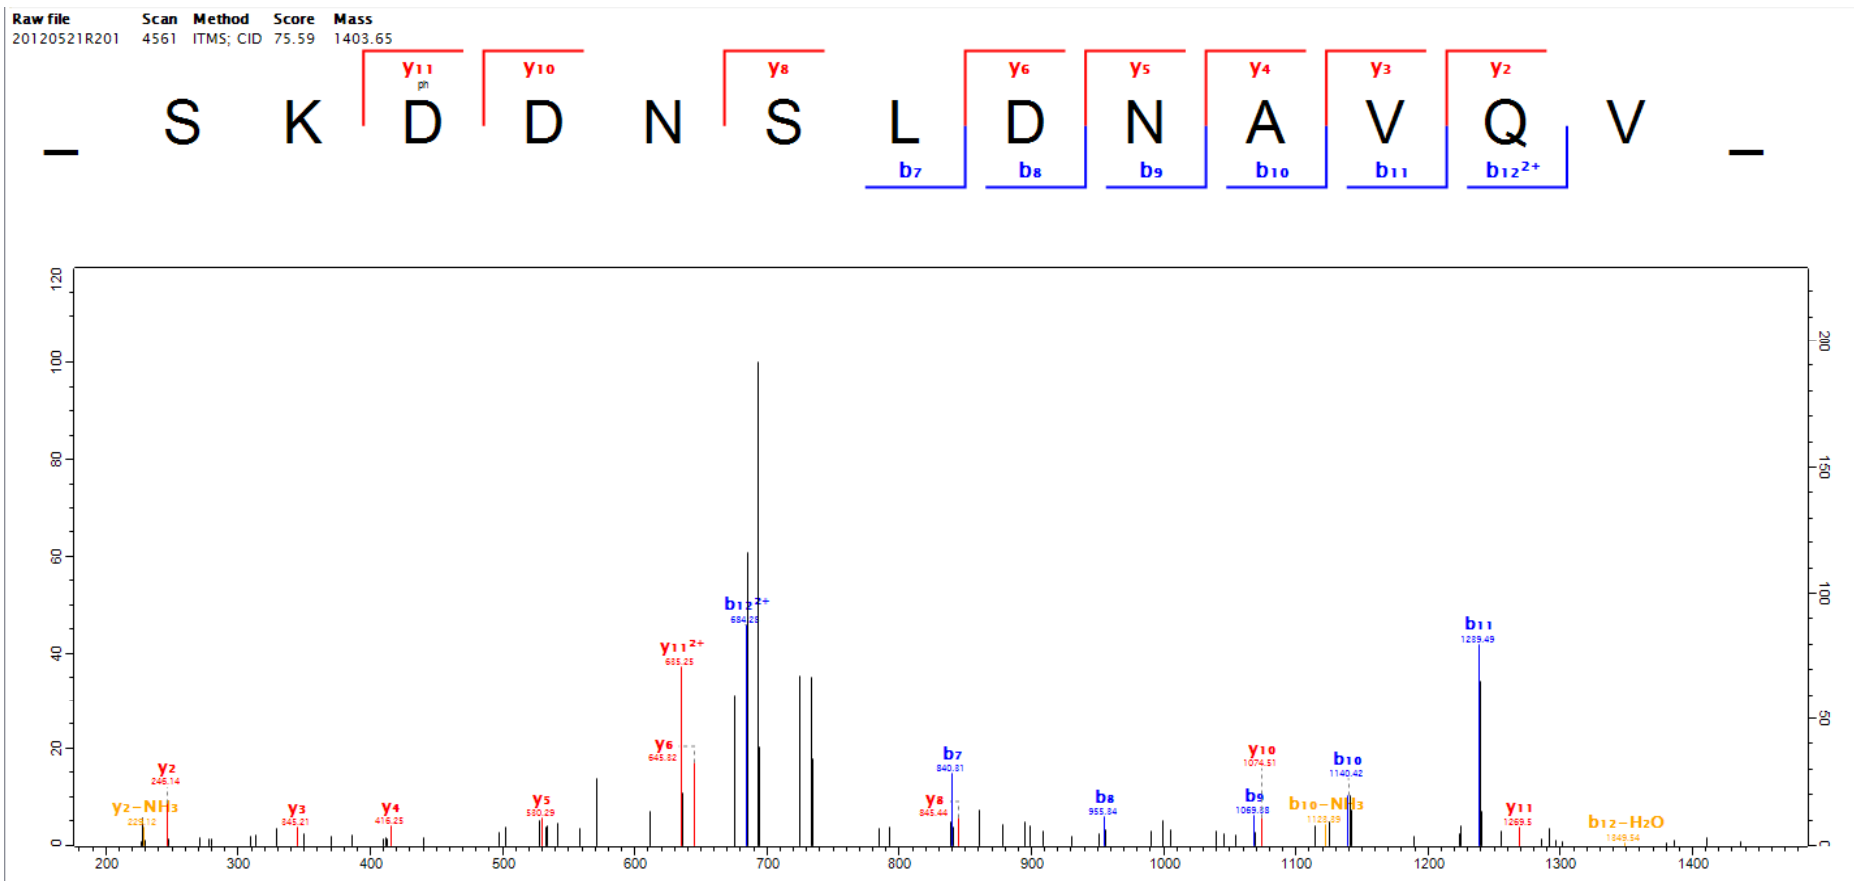



6-3

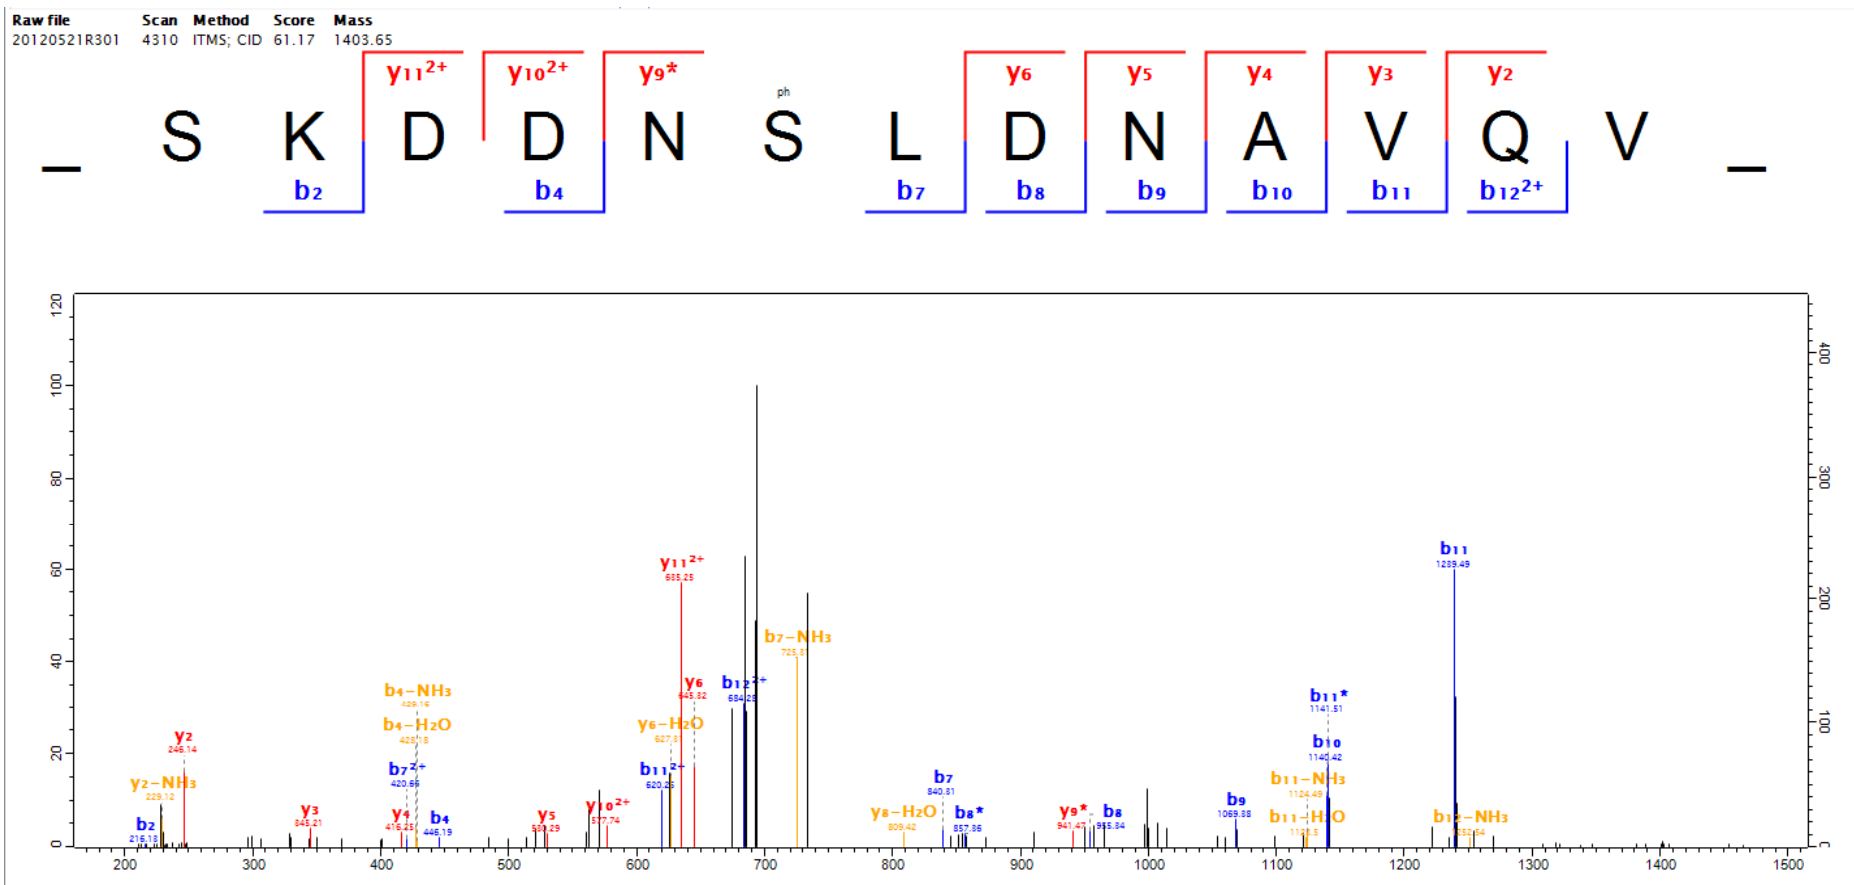

6-4

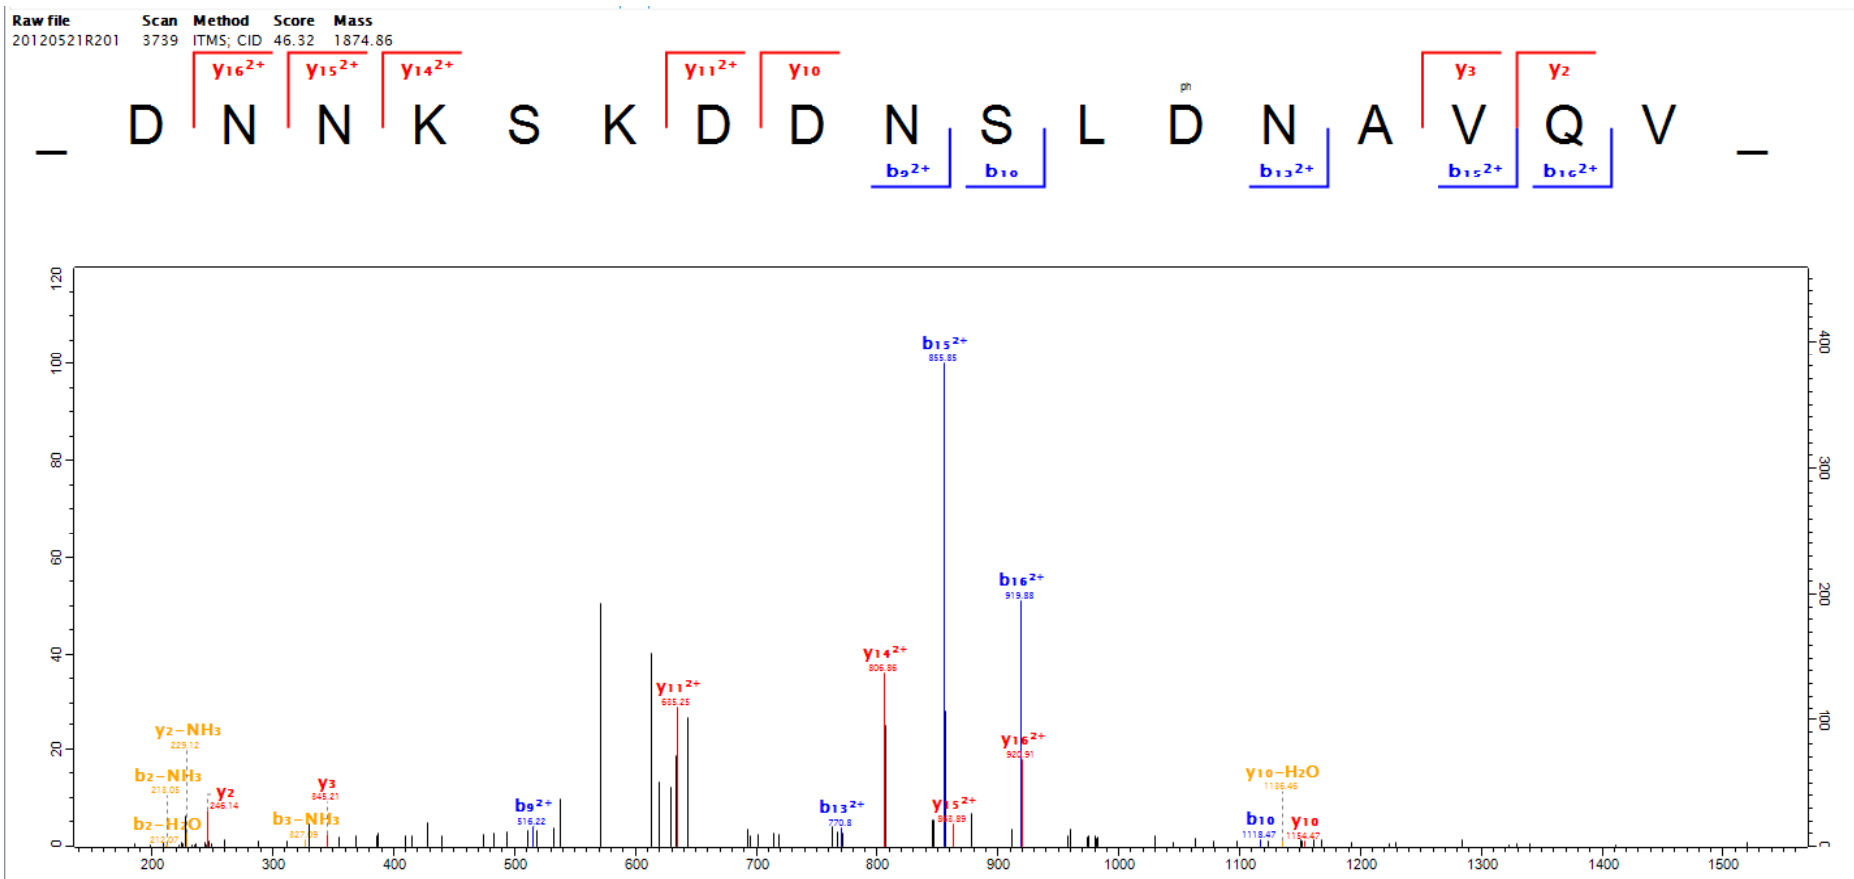

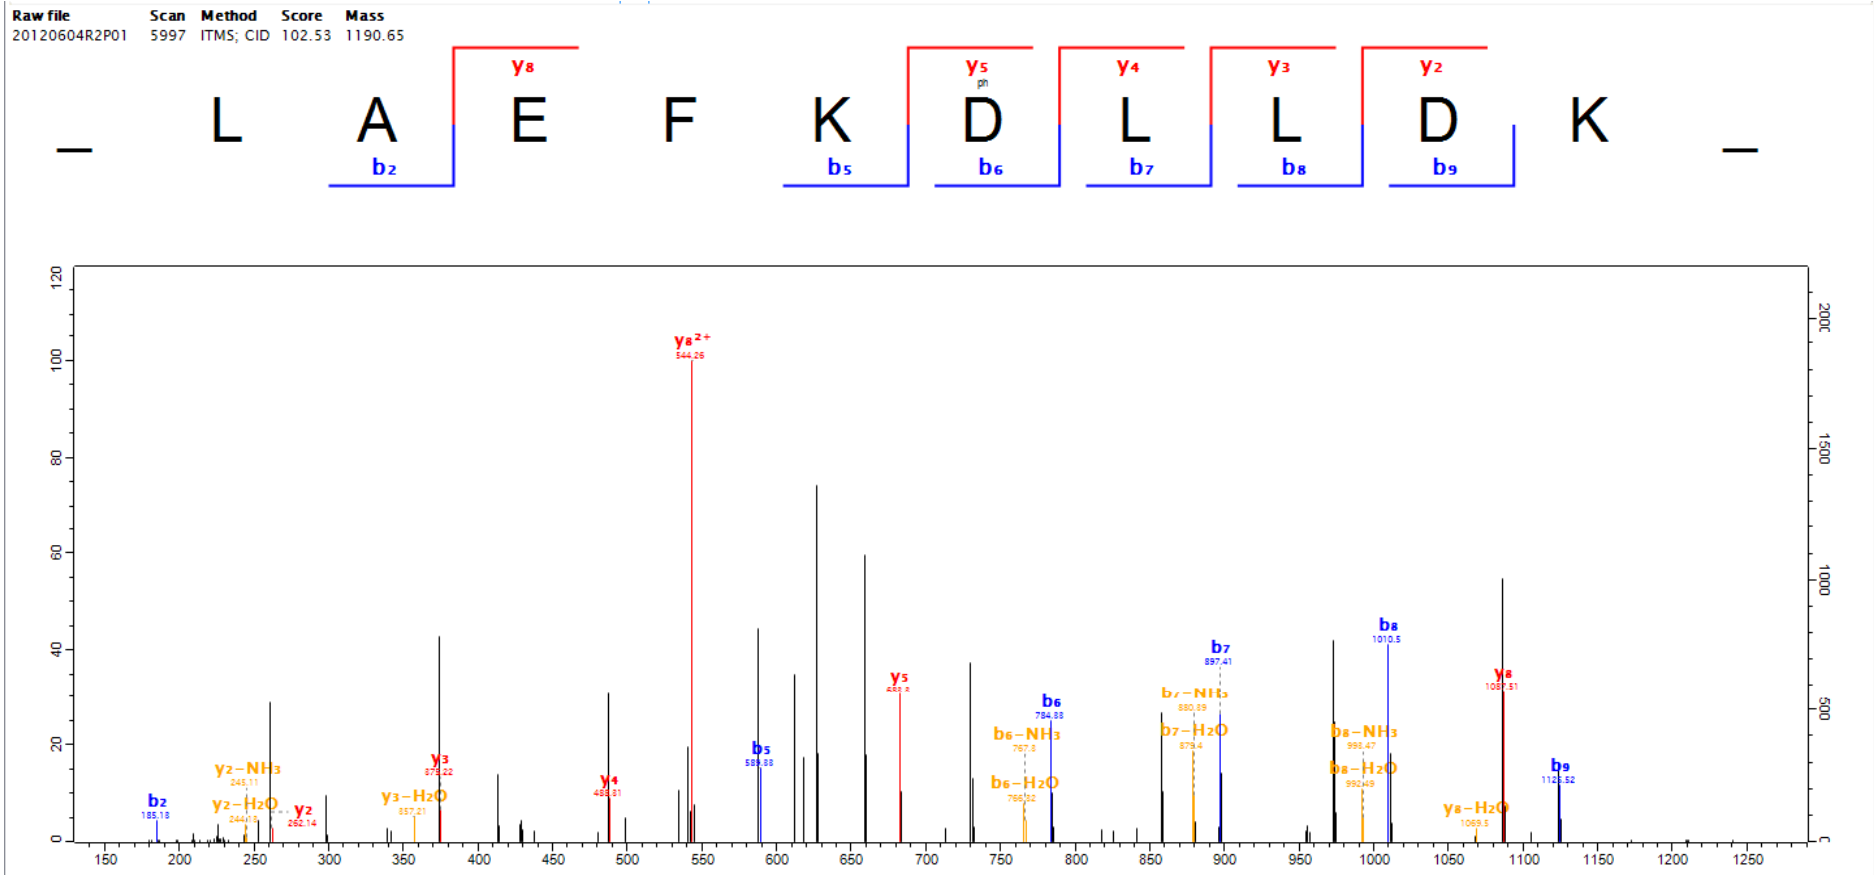

8-1

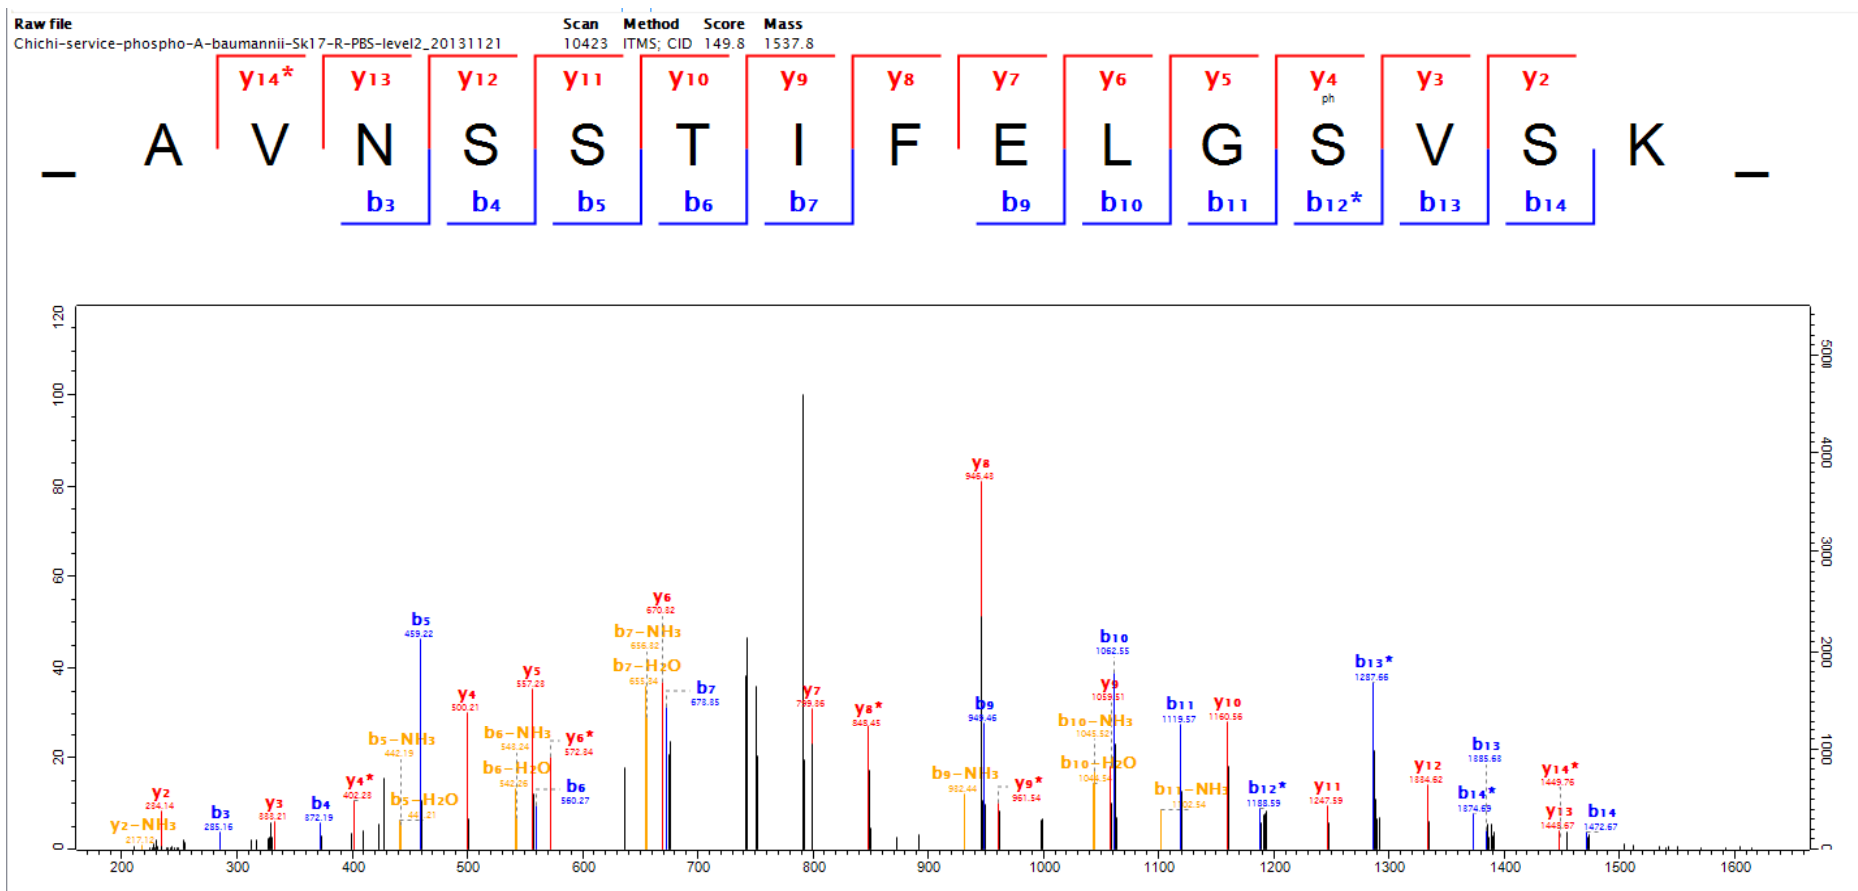

8-2

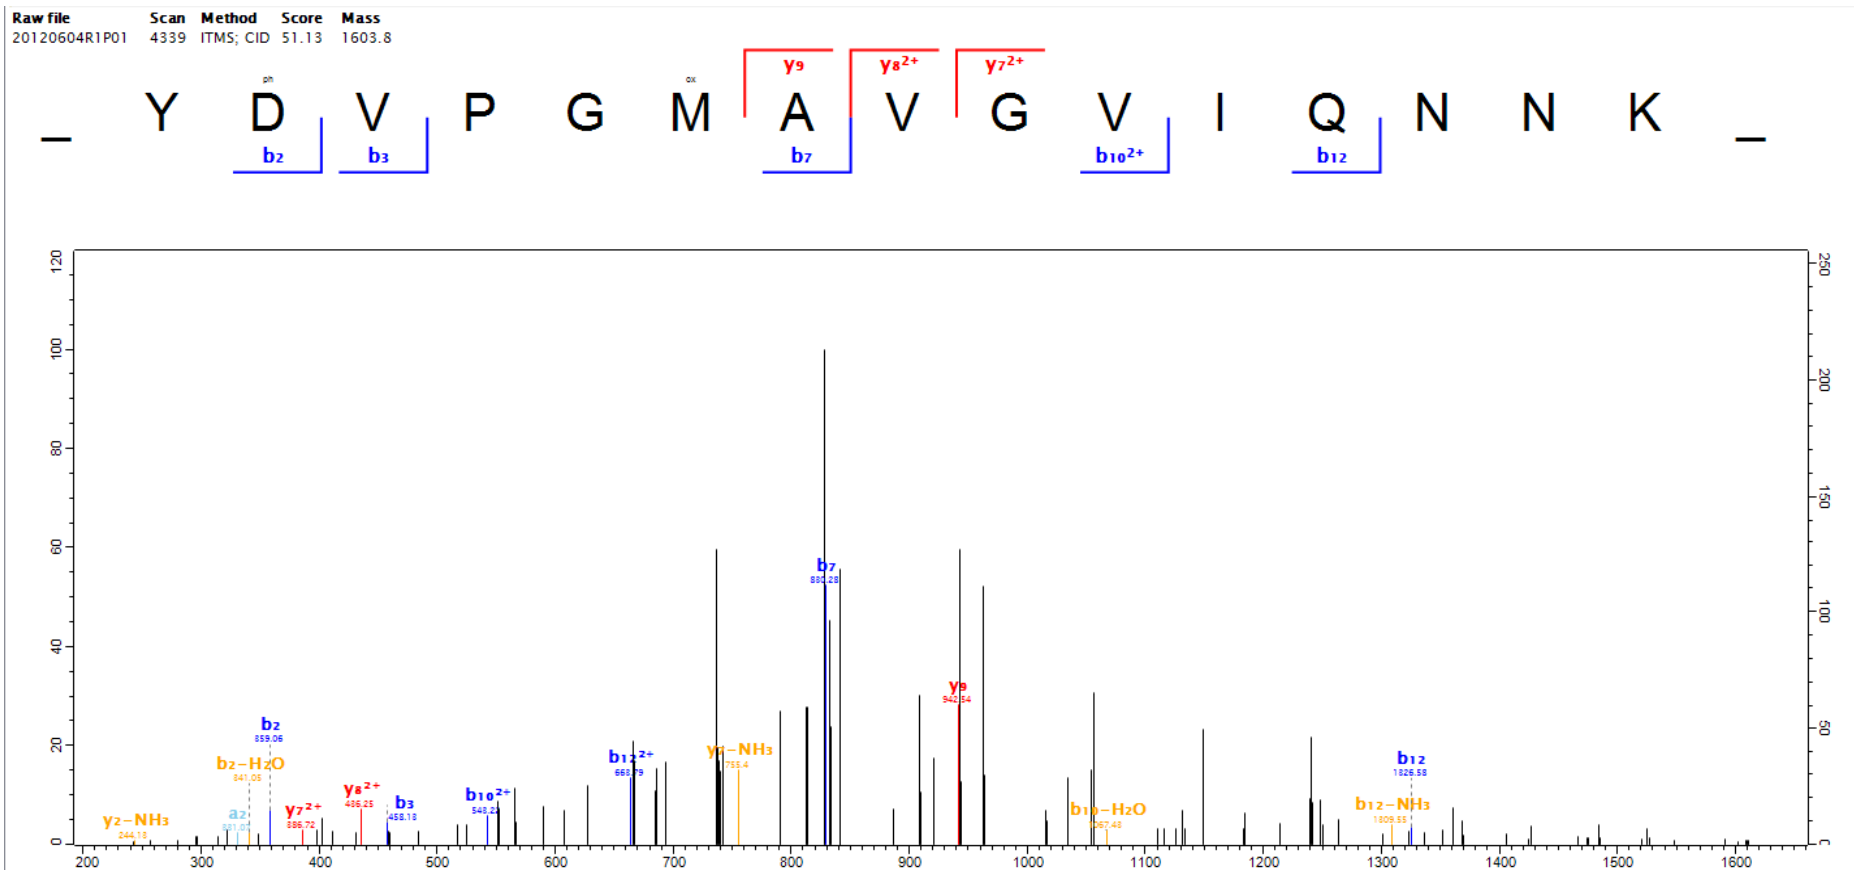

9-1

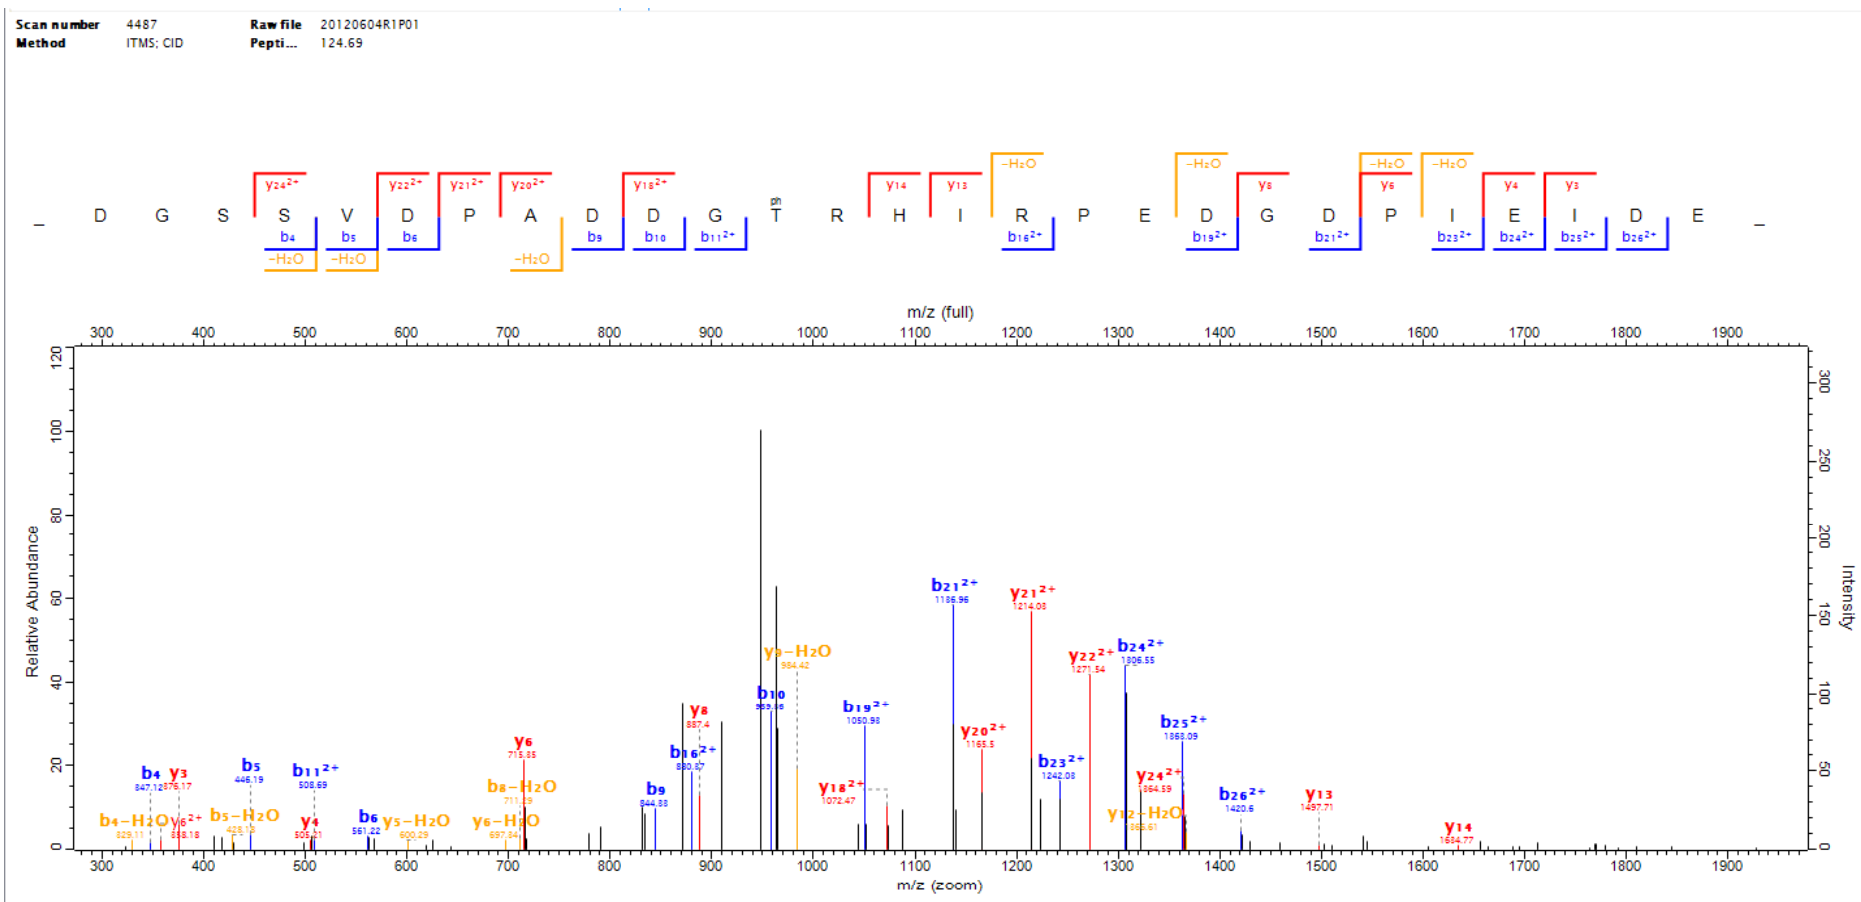

9-2

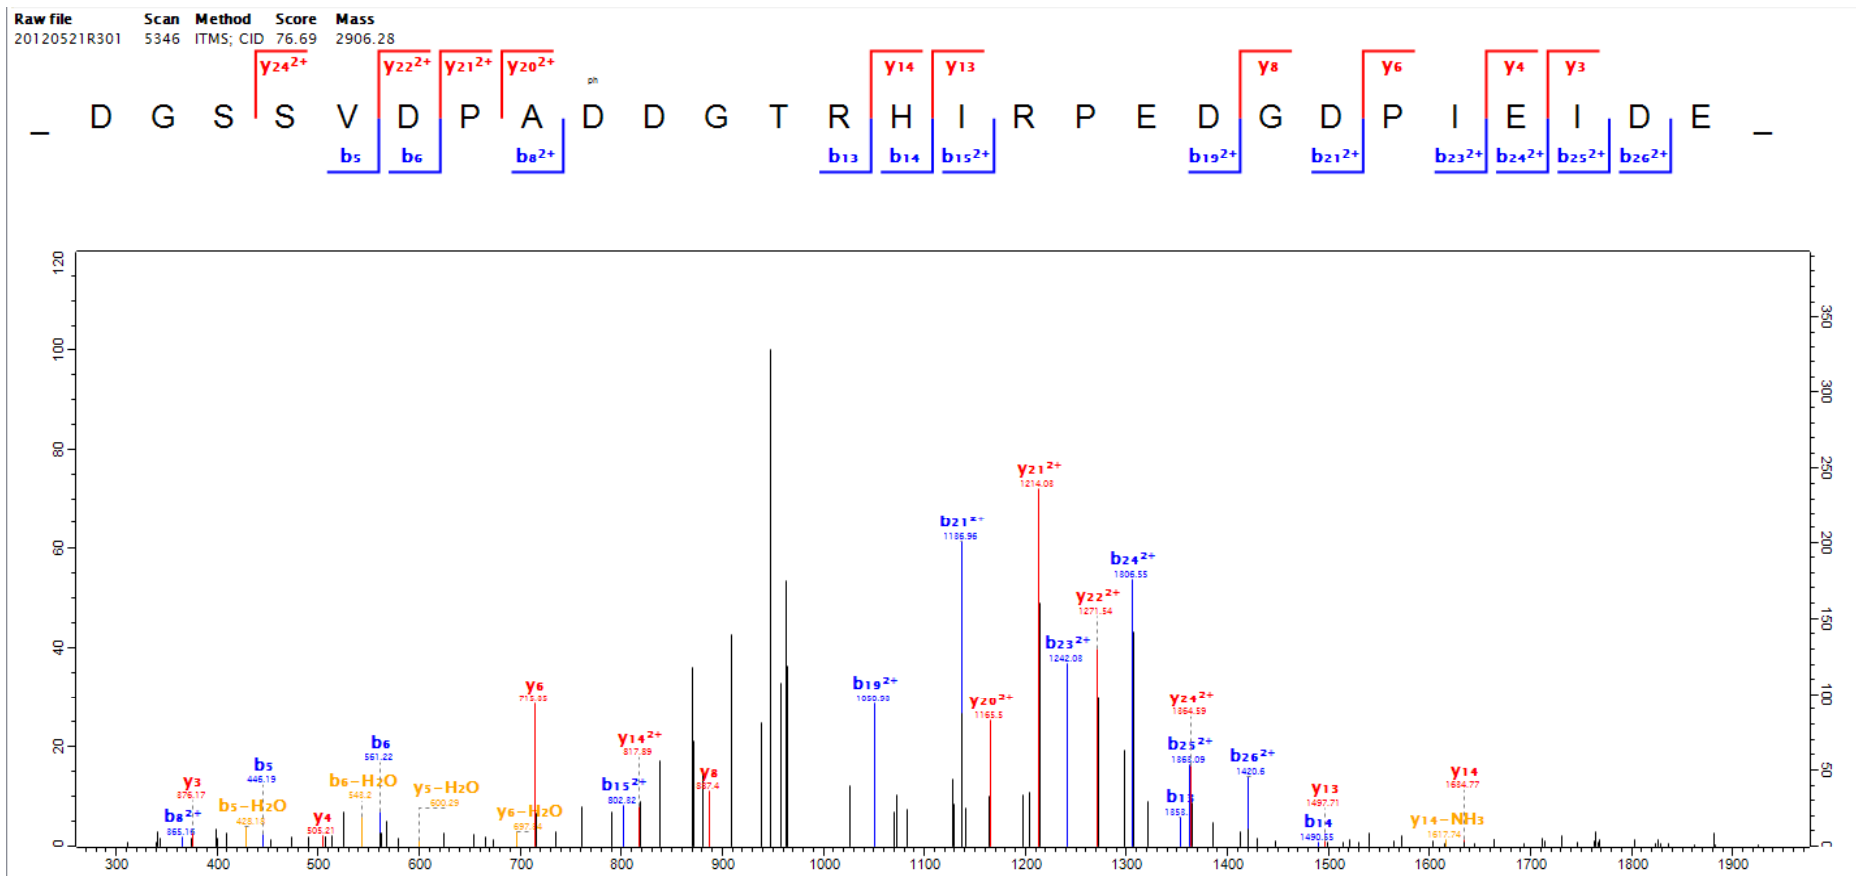

# 9-3

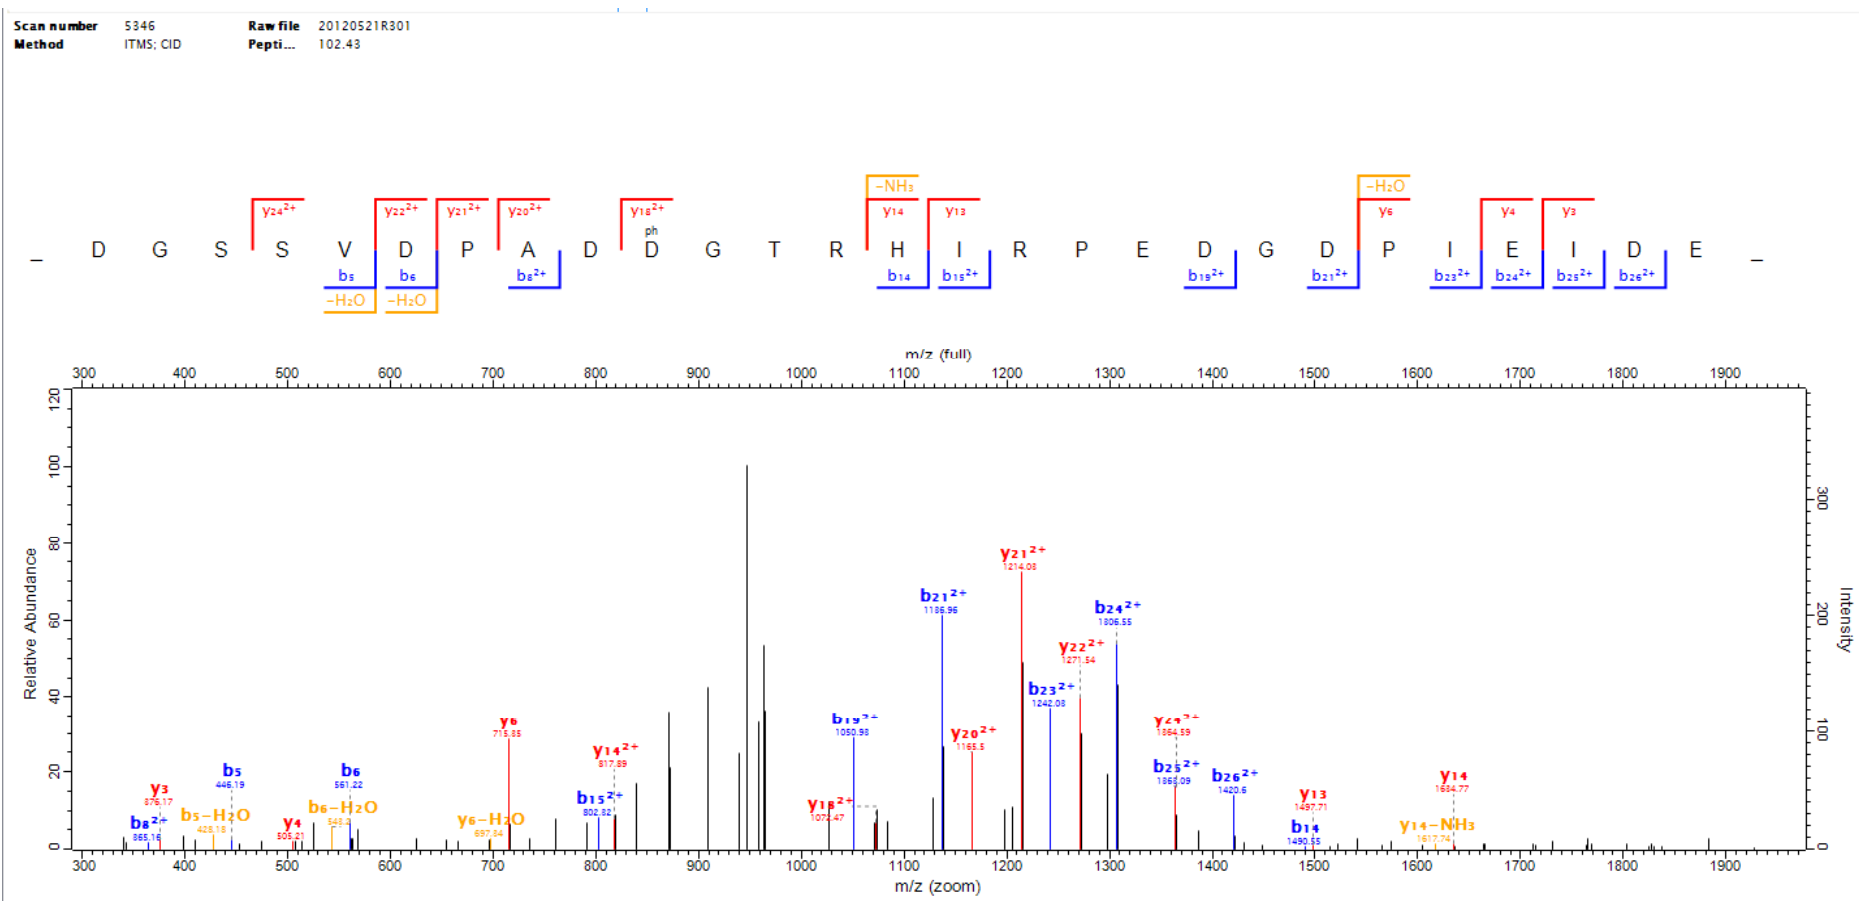



9-4

Scan number 6012 Raw file 20120521R101  
 Method ITMS: CID Pepti... 108.37

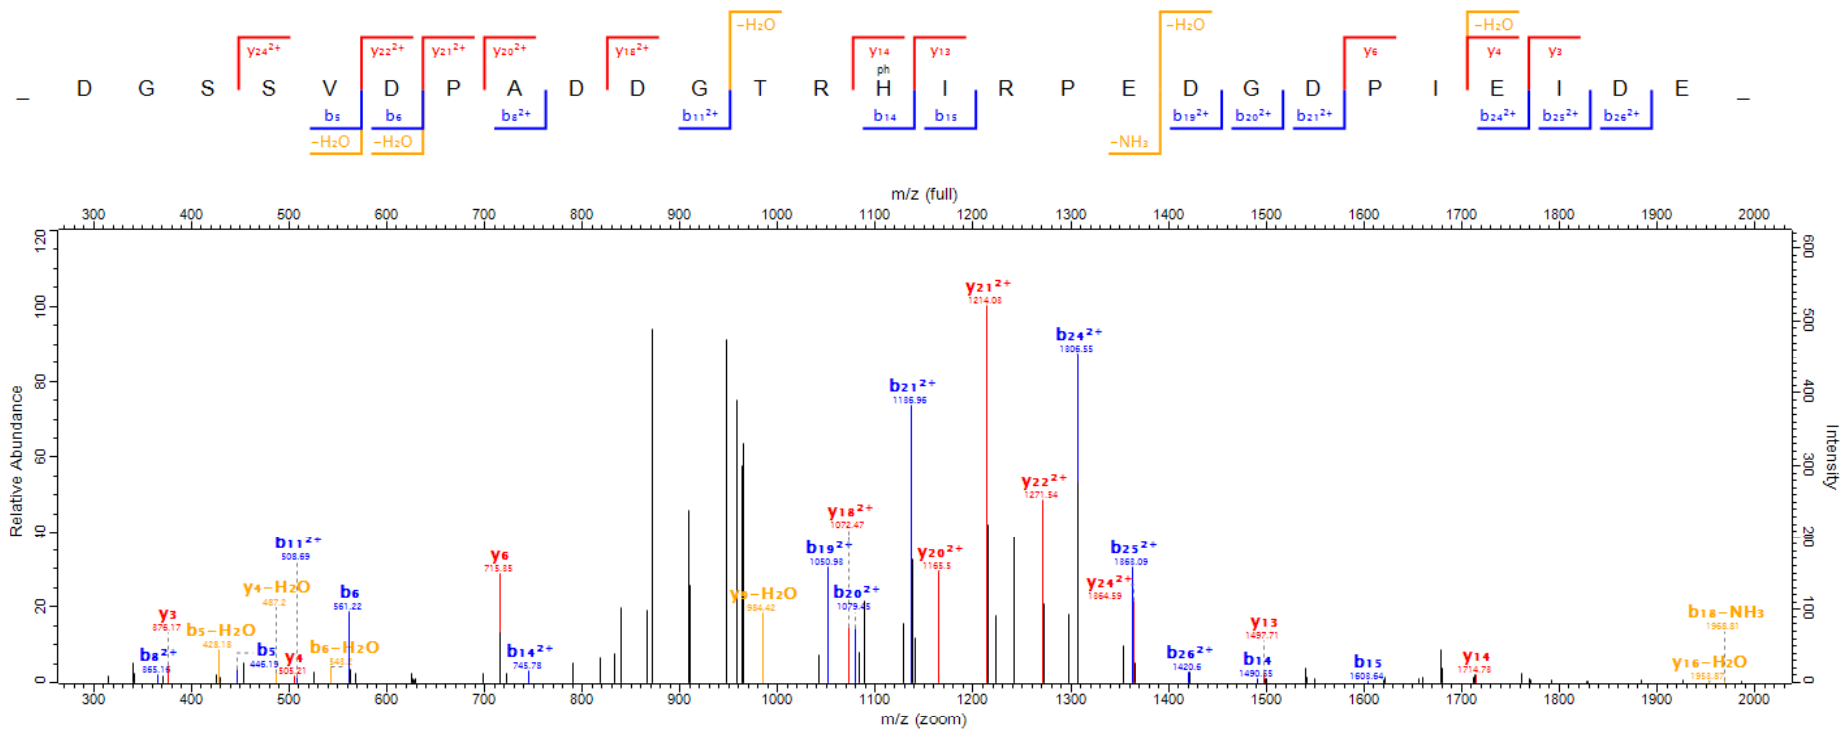

10-1

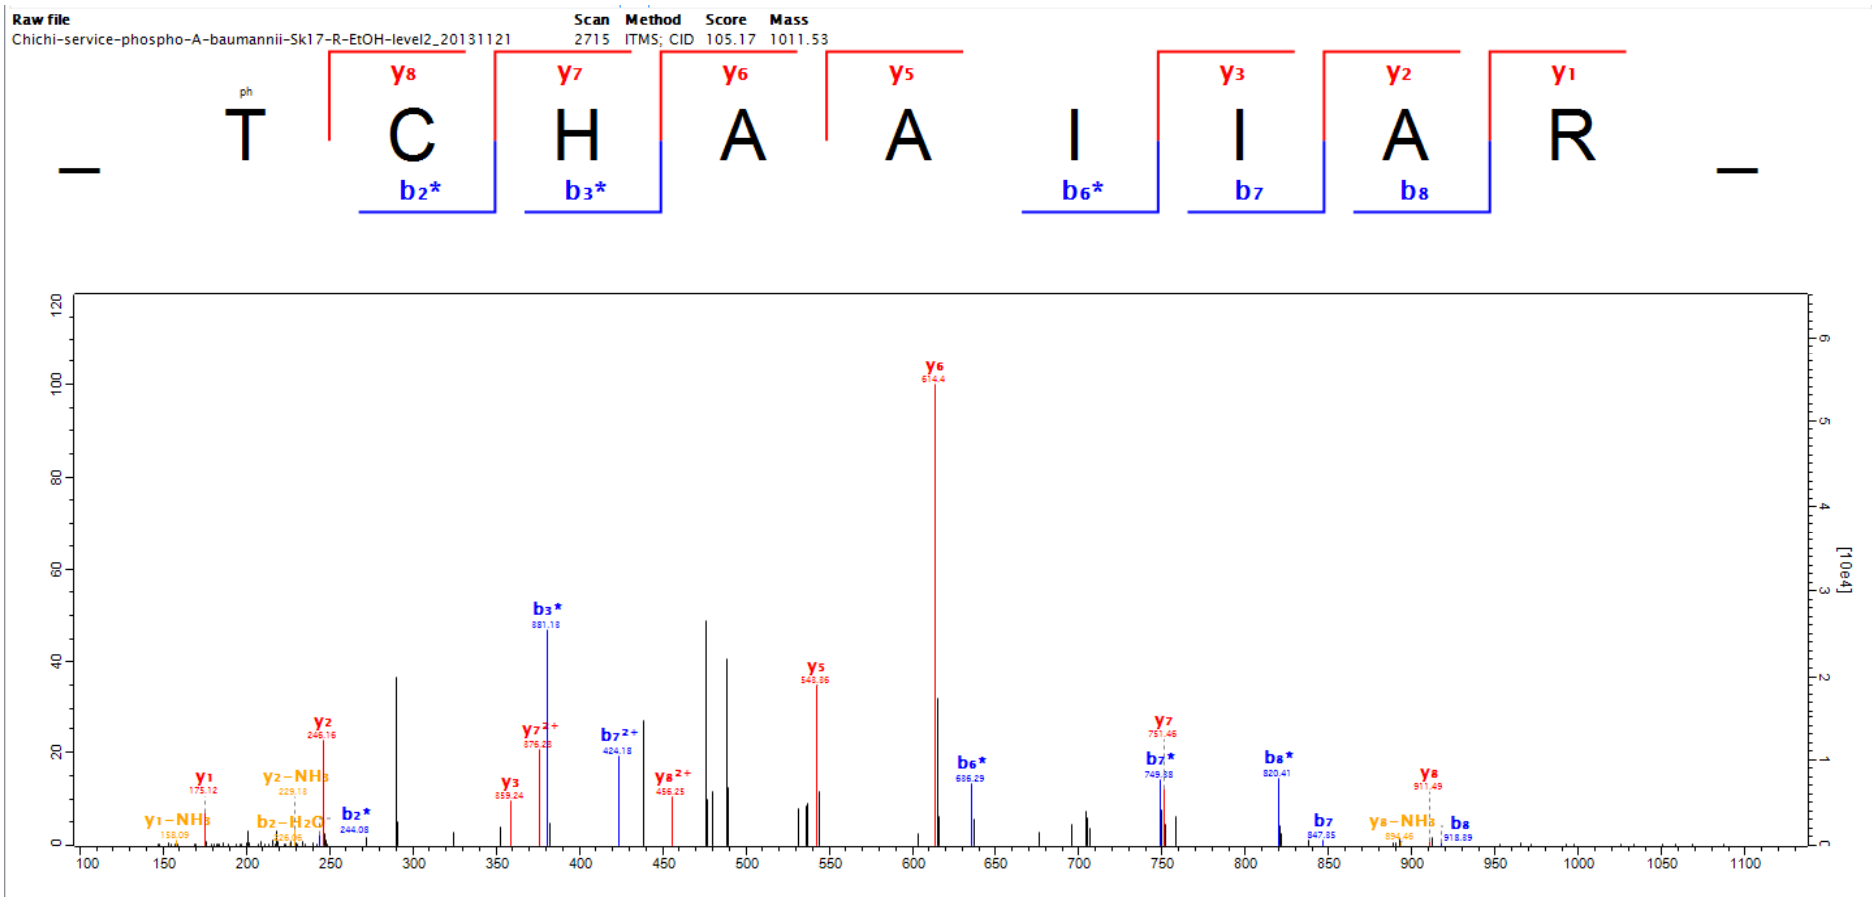

10-2

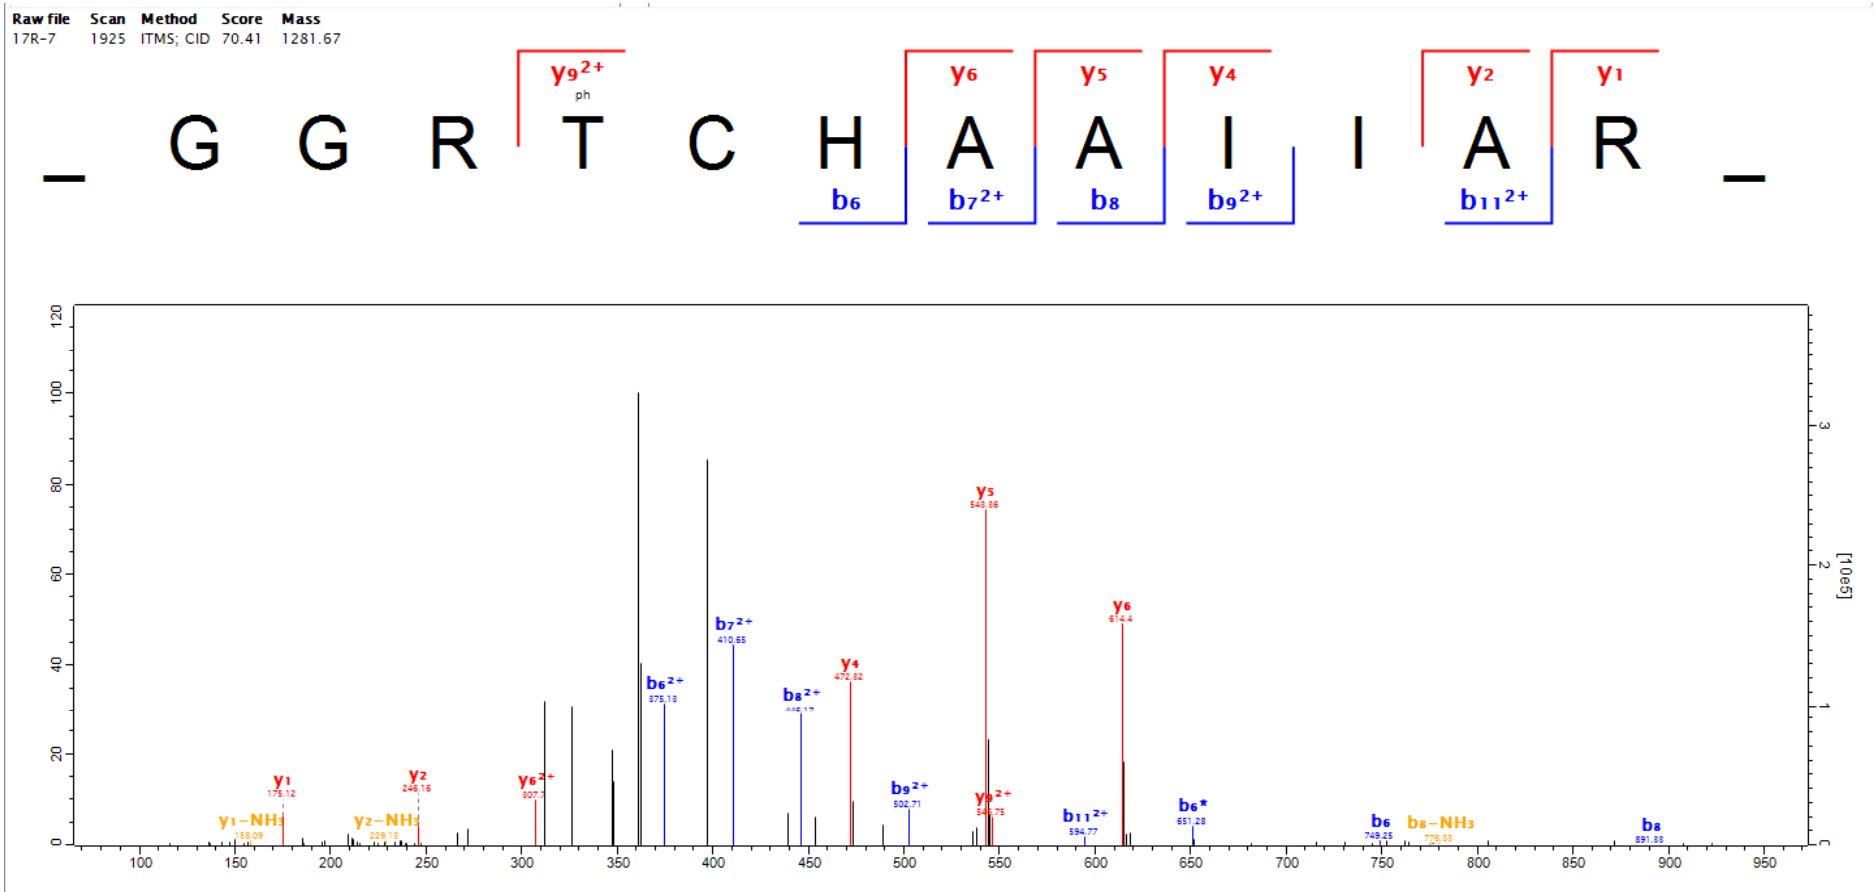

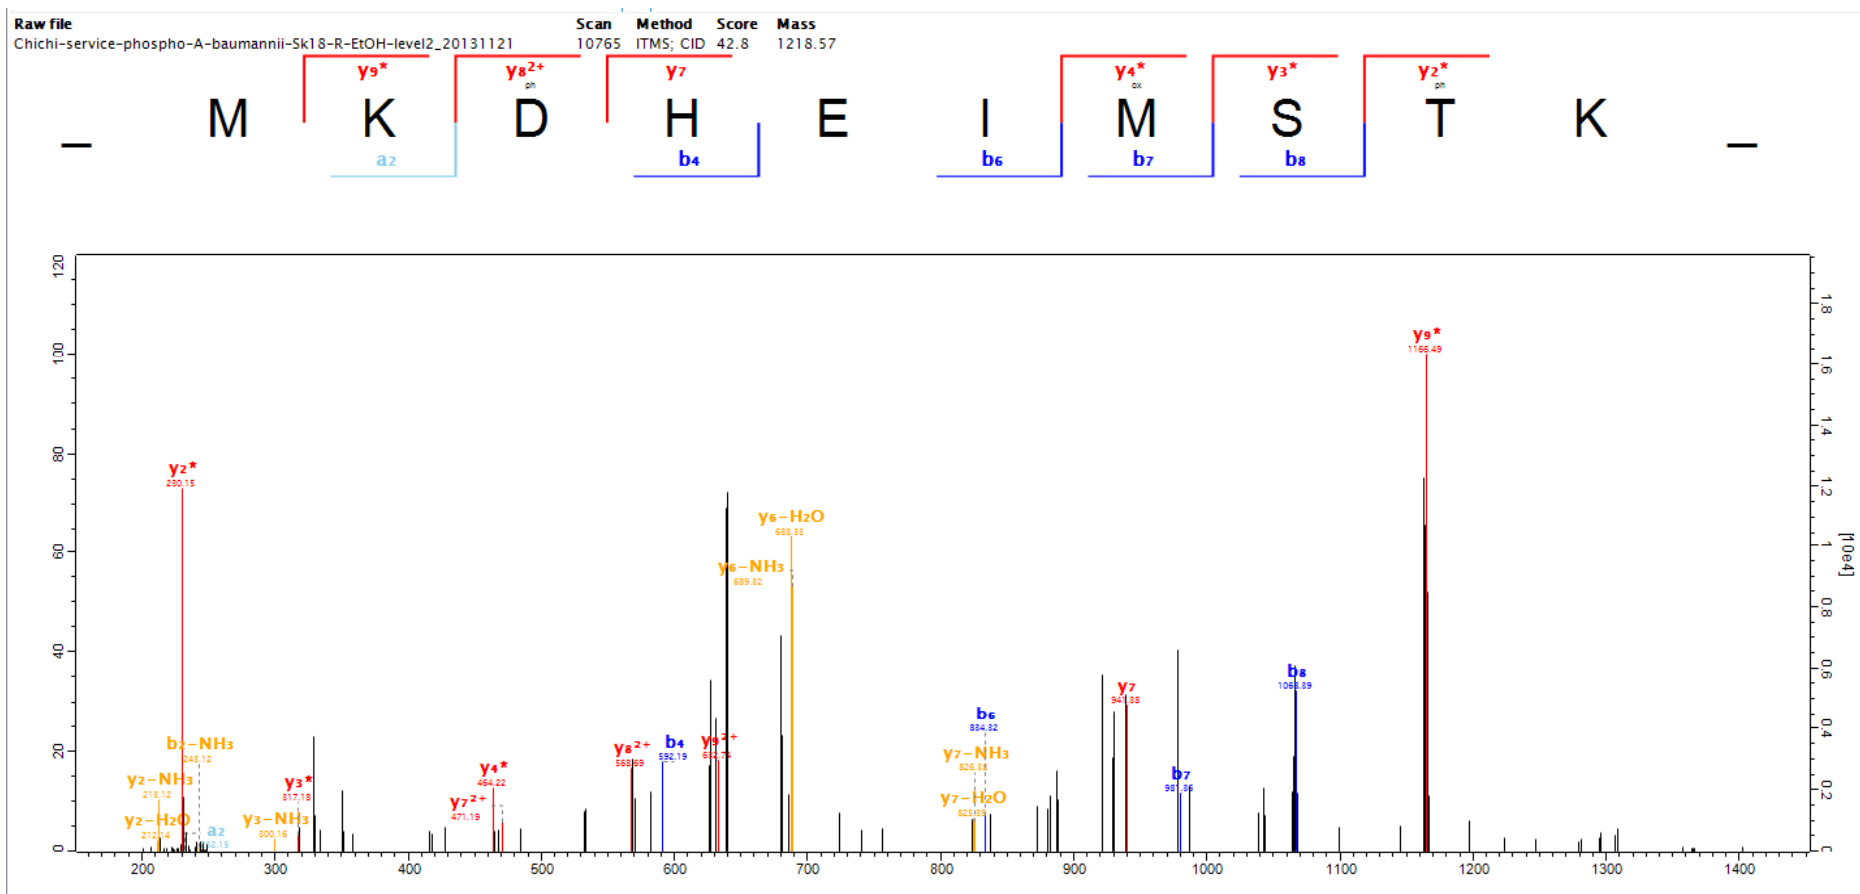

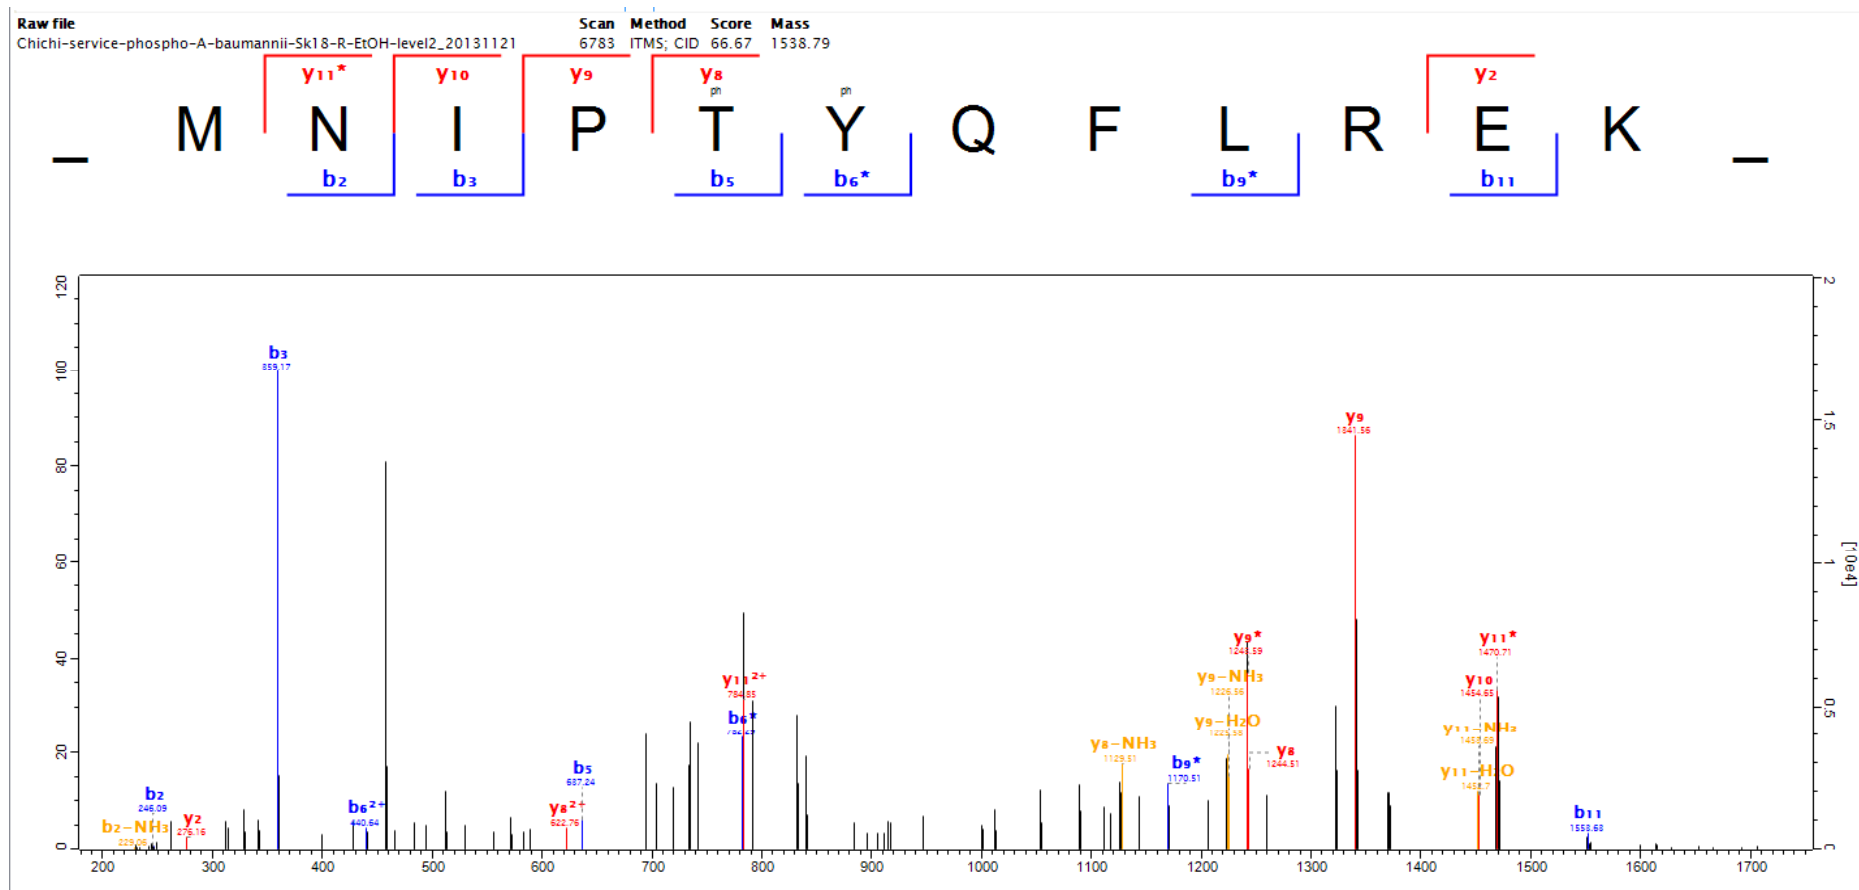

13-1

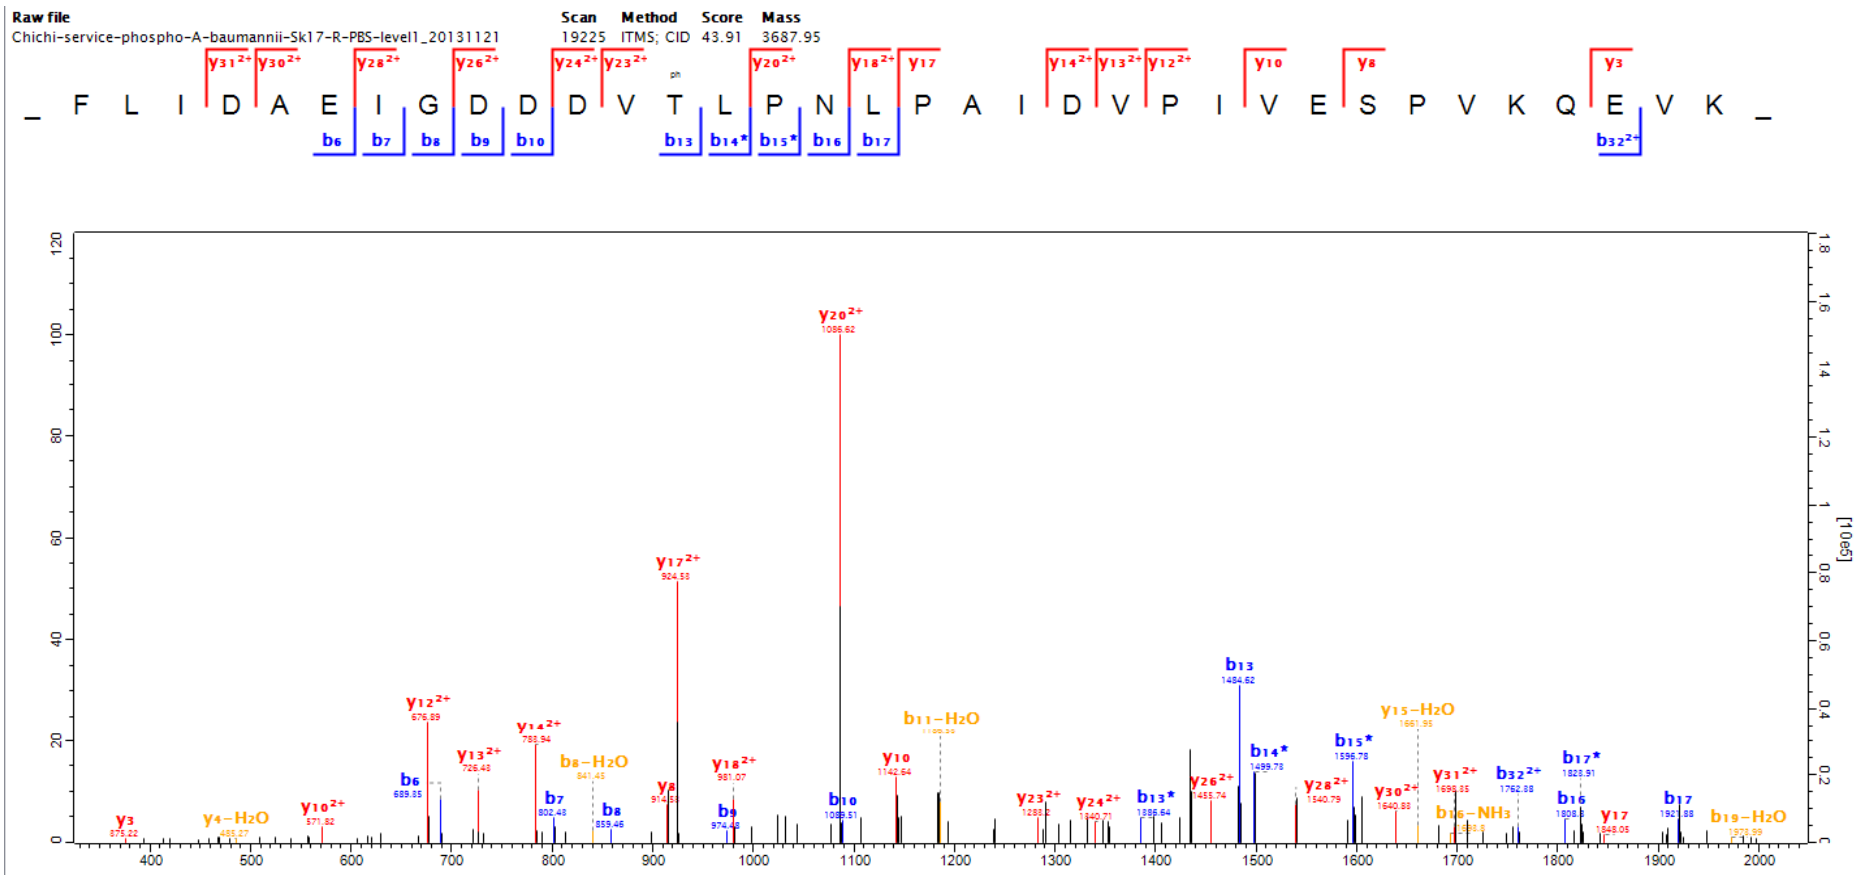

# 13-2

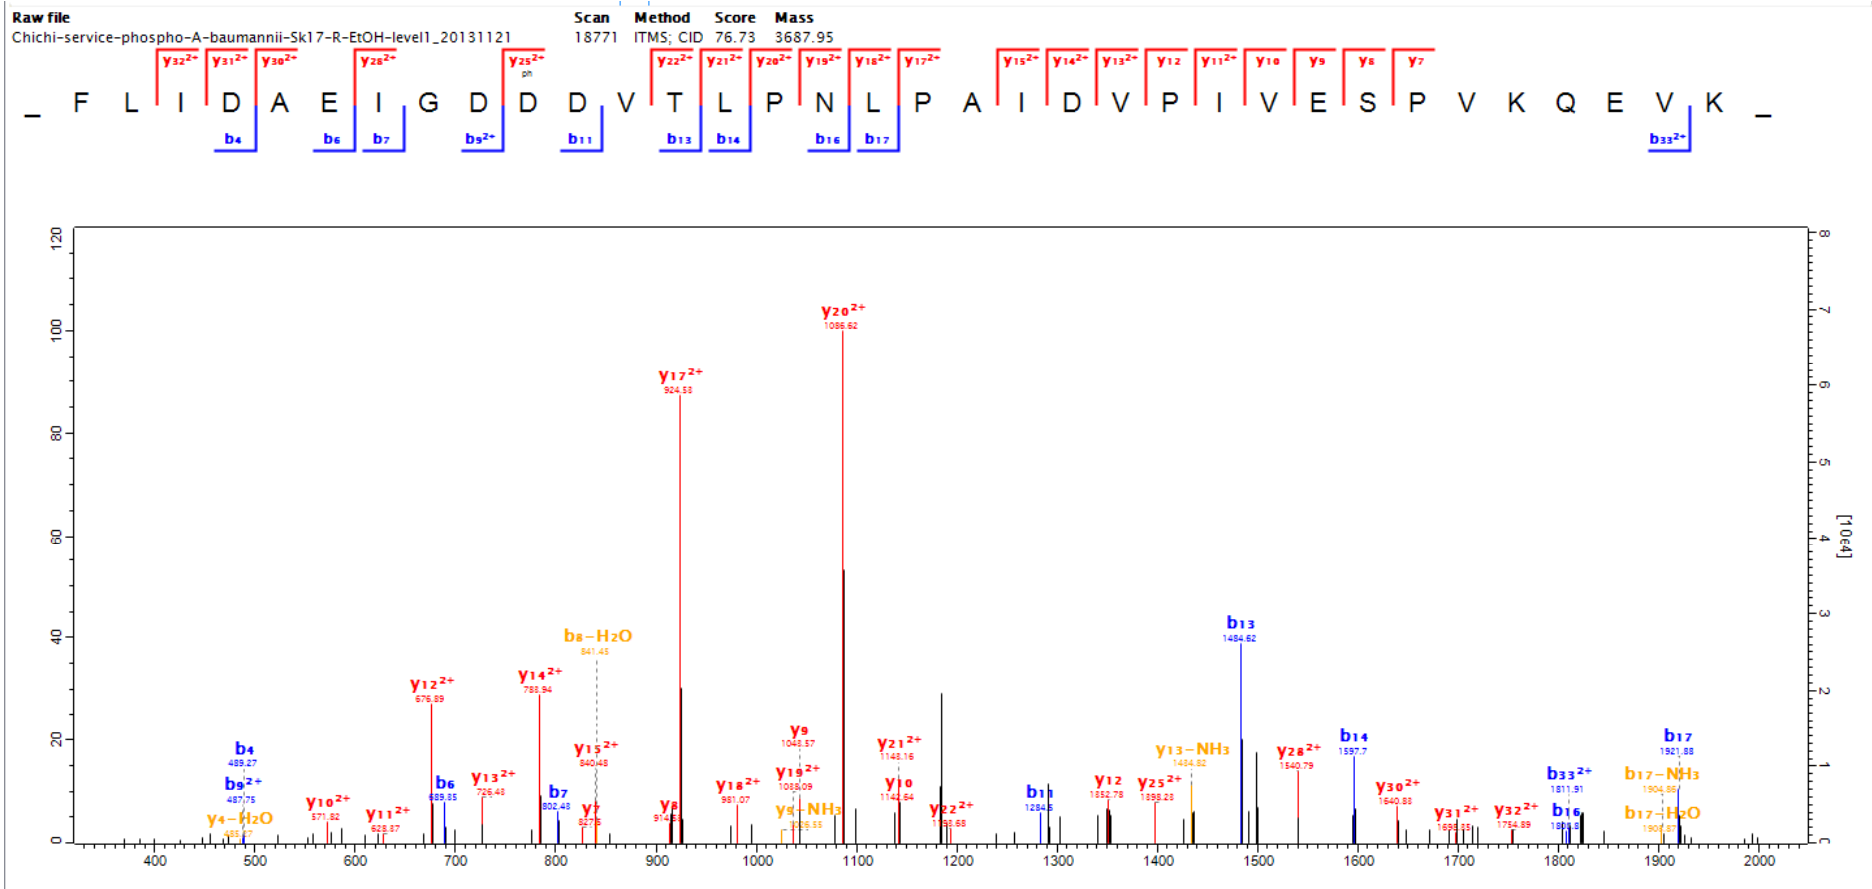

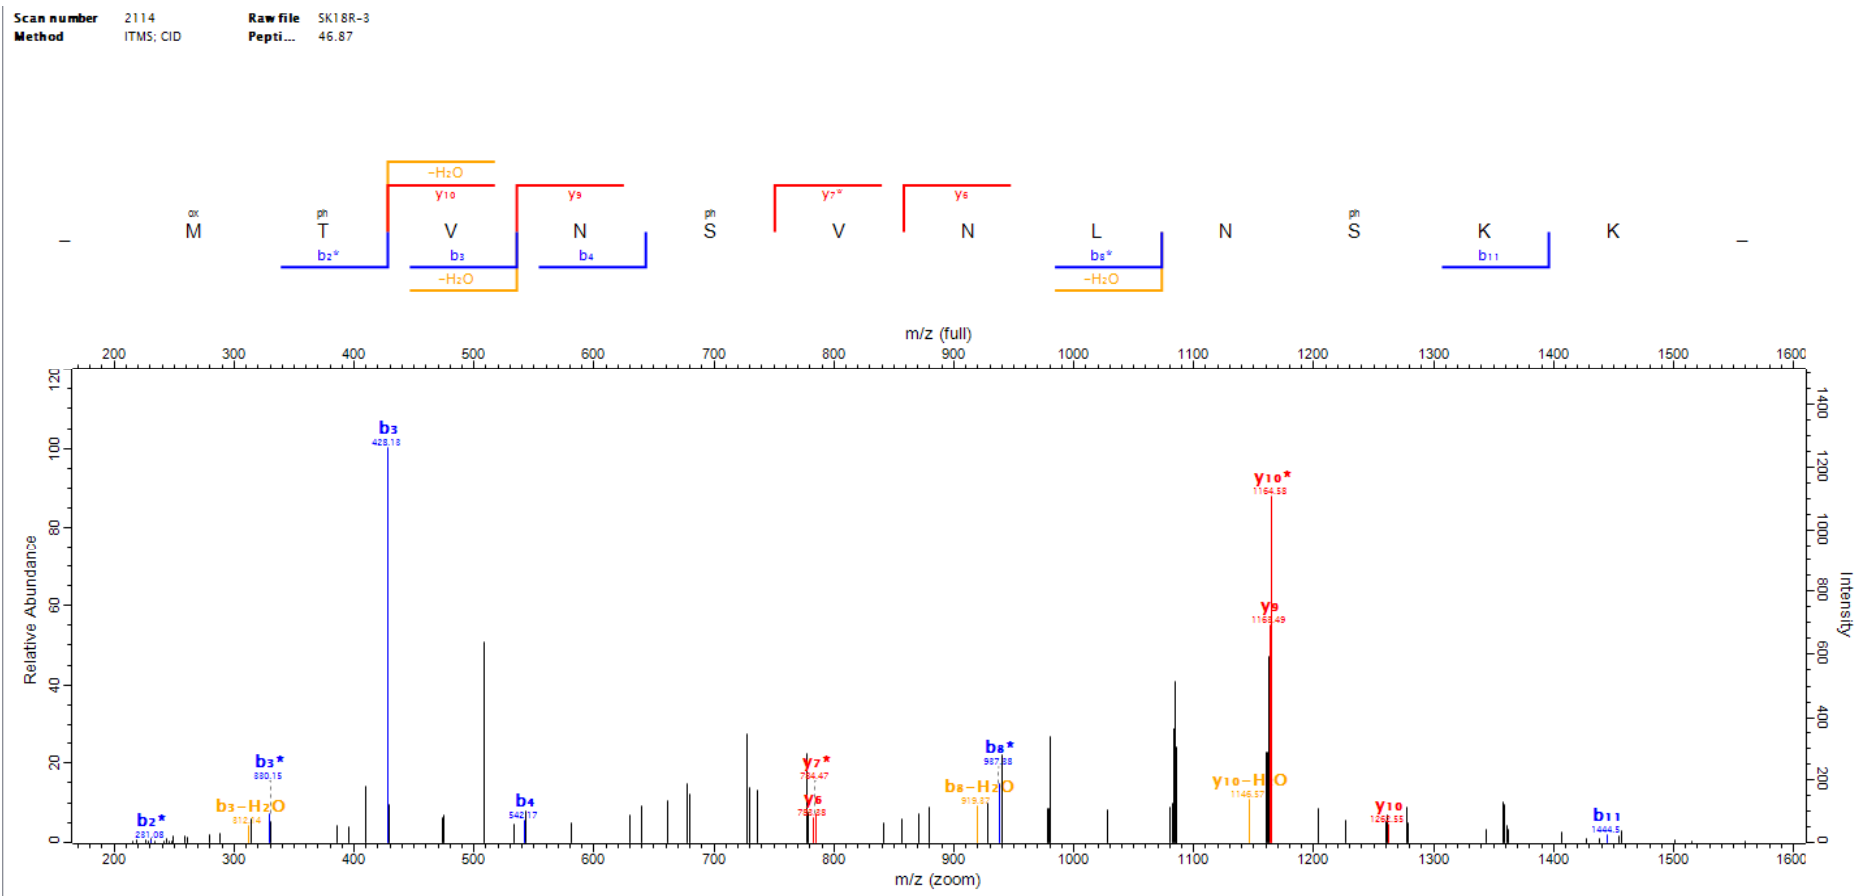



Raw file Scan Method Score Mass  
 20120521R201 1415 ITMS; CID 37.88 2343.01

y<sub>17</sub><sup>2+</sup> T D H A Q b<sub>9</sub> b<sub>10</sub><sup>2+</sup> b<sub>11</sub> y<sub>12</sub><sup>2+</sup> y<sub>11</sub><sup>2+</sup> A y<sub>10</sub> y<sub>9</sub> D y<sub>7</sub><sup>2+</sup> H N Y <sup>p</sup>S b<sub>16</sub><sup>2+</sup> b<sub>17</sub><sup>2+</sup> b<sub>19</sub><sup>2+</sup> D y<sub>2</sub> S R

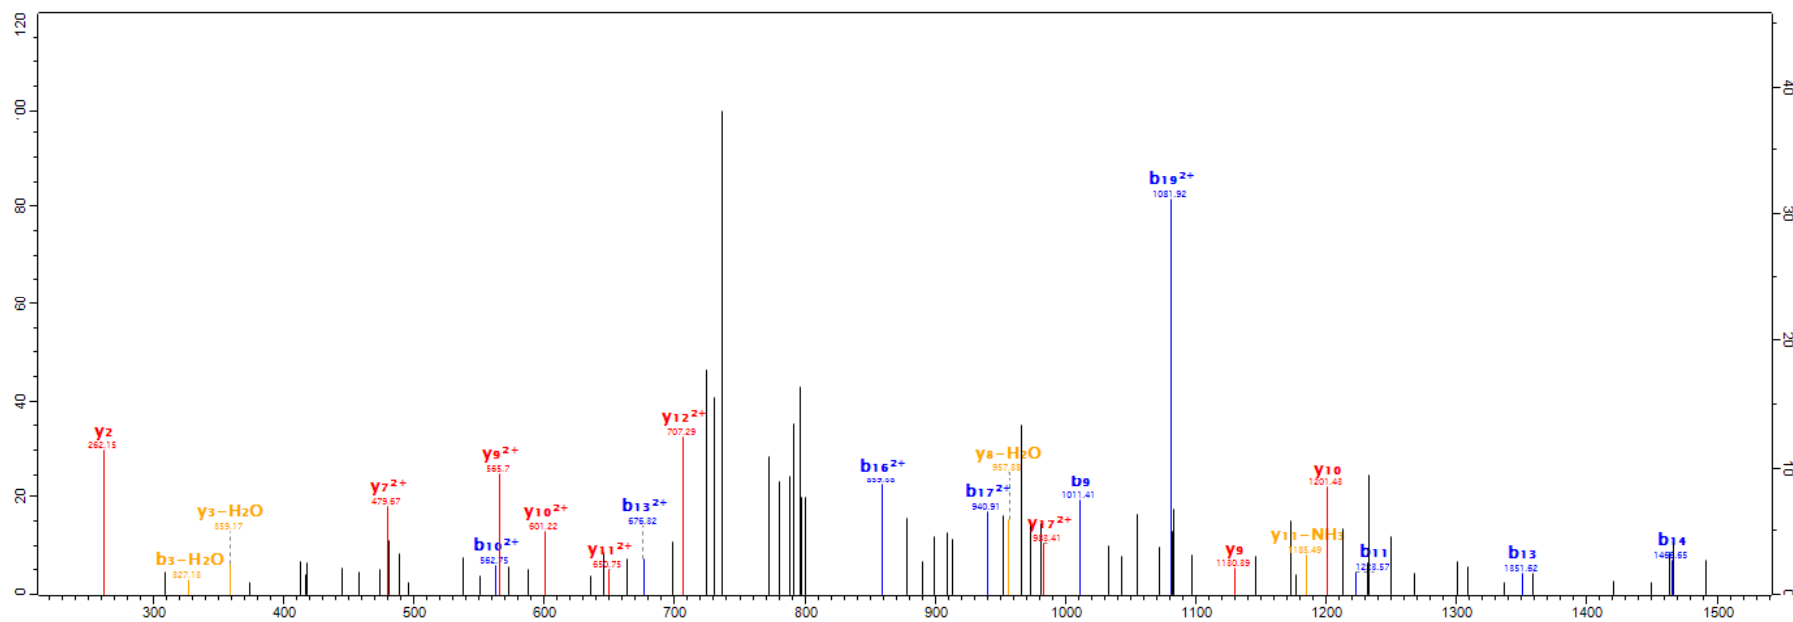

16-1

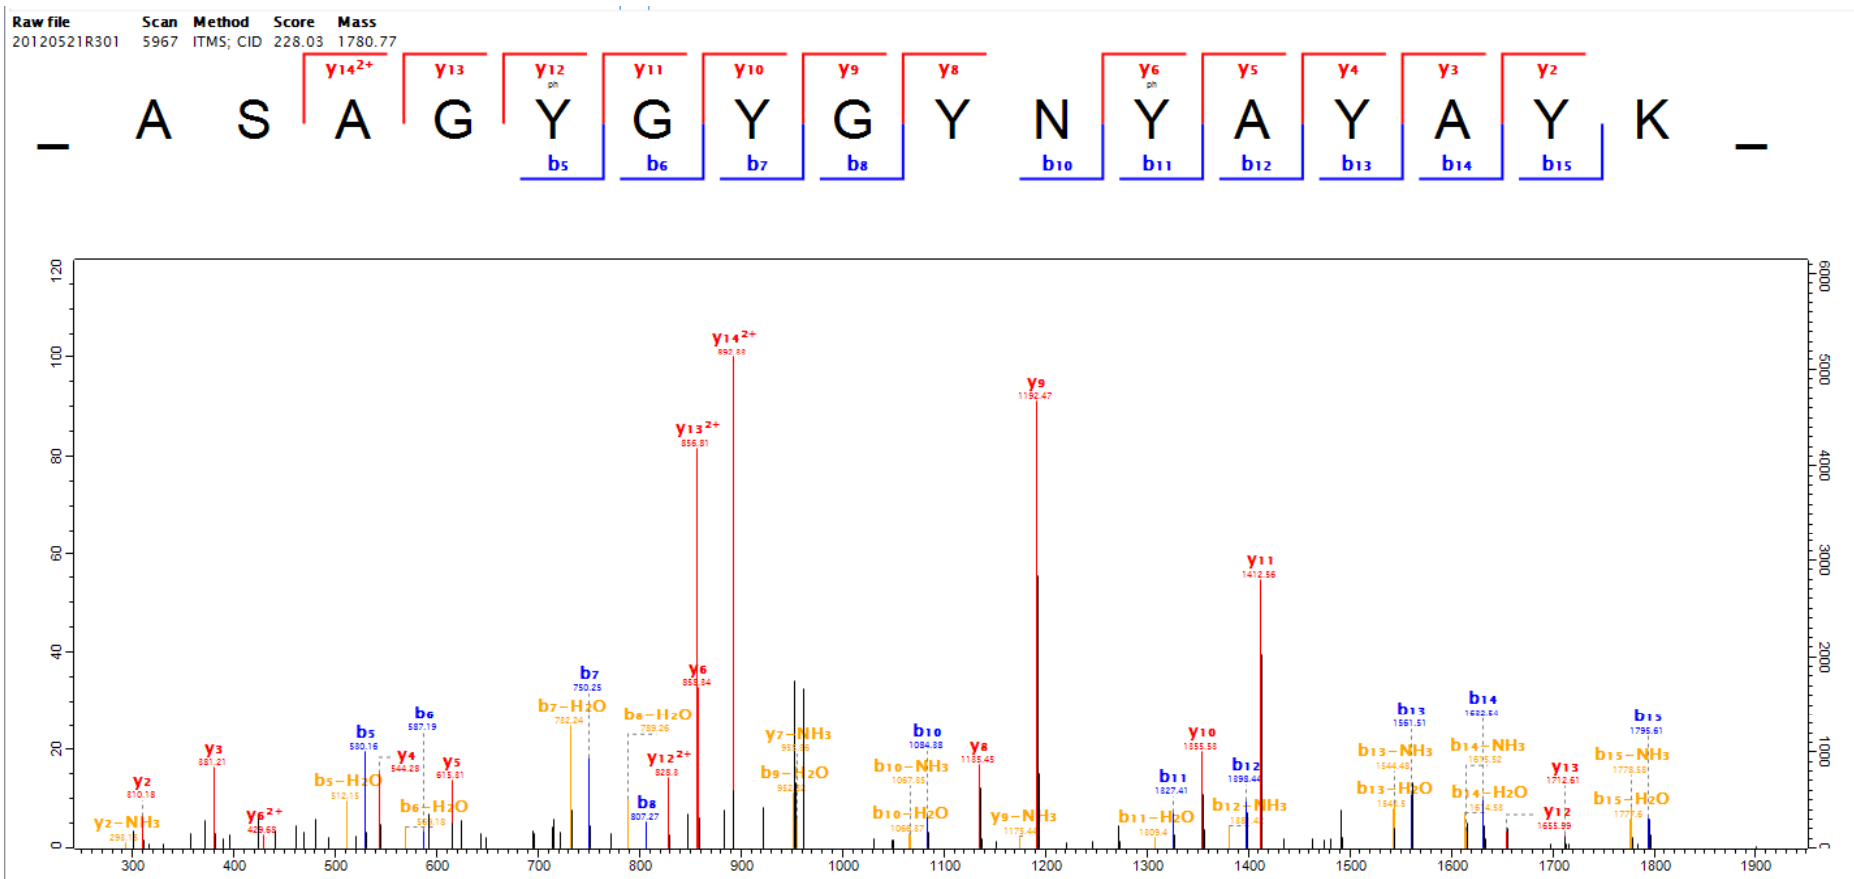

16-2

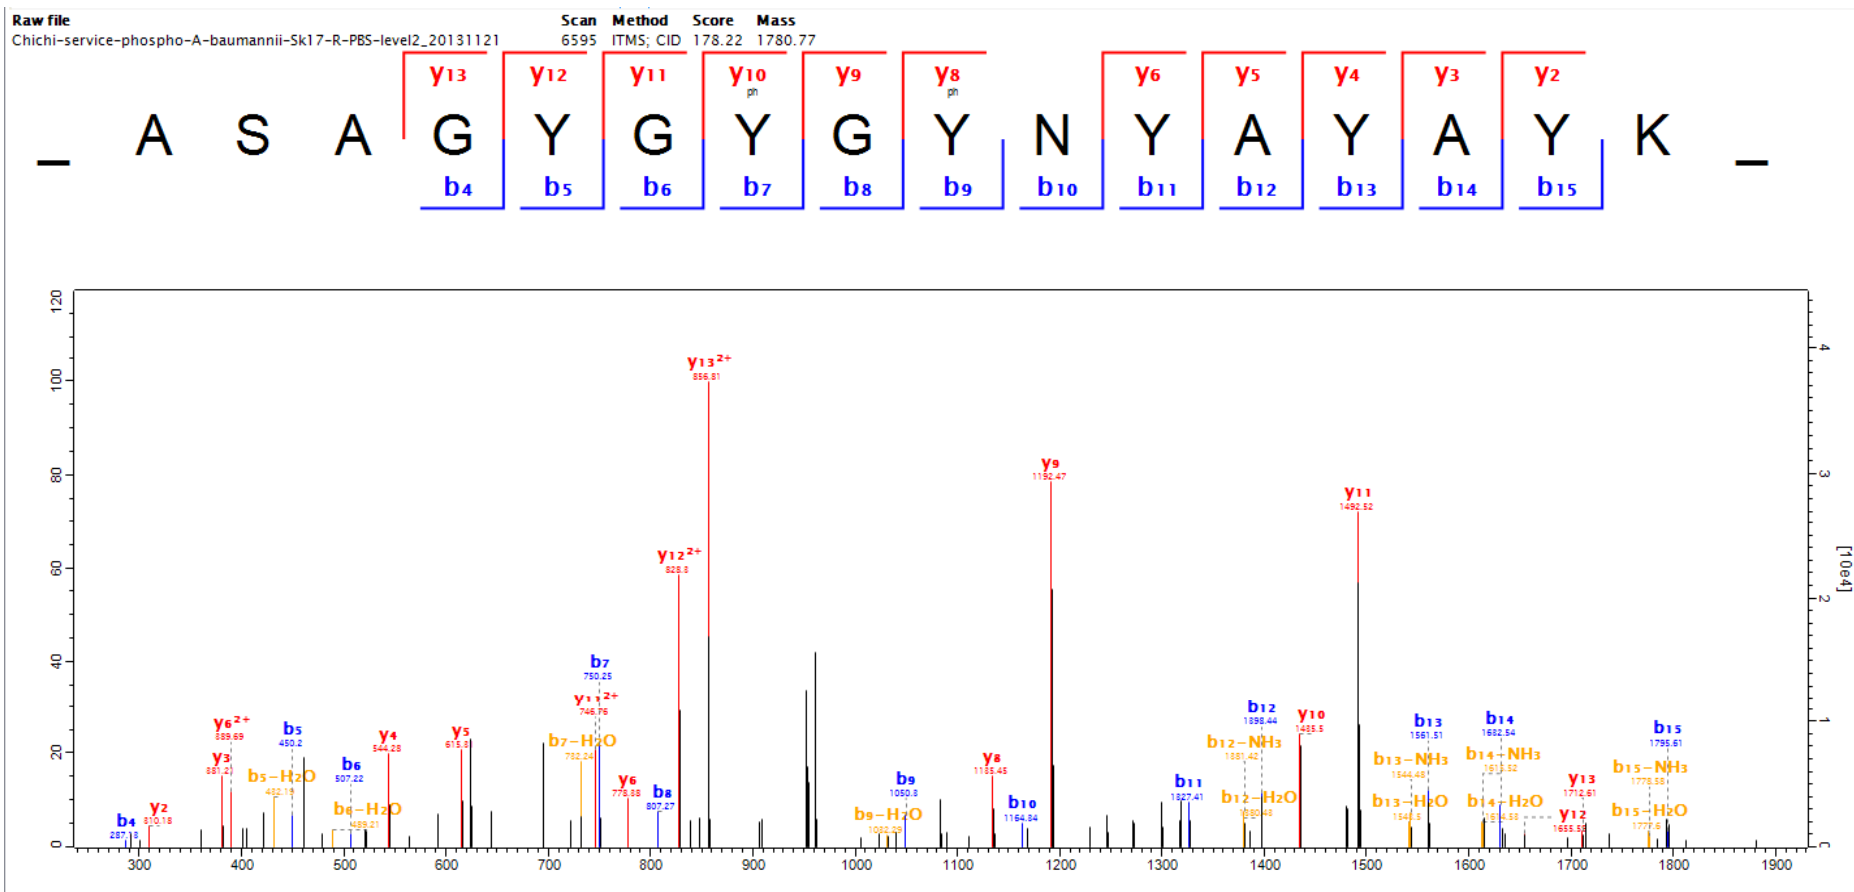

16-3

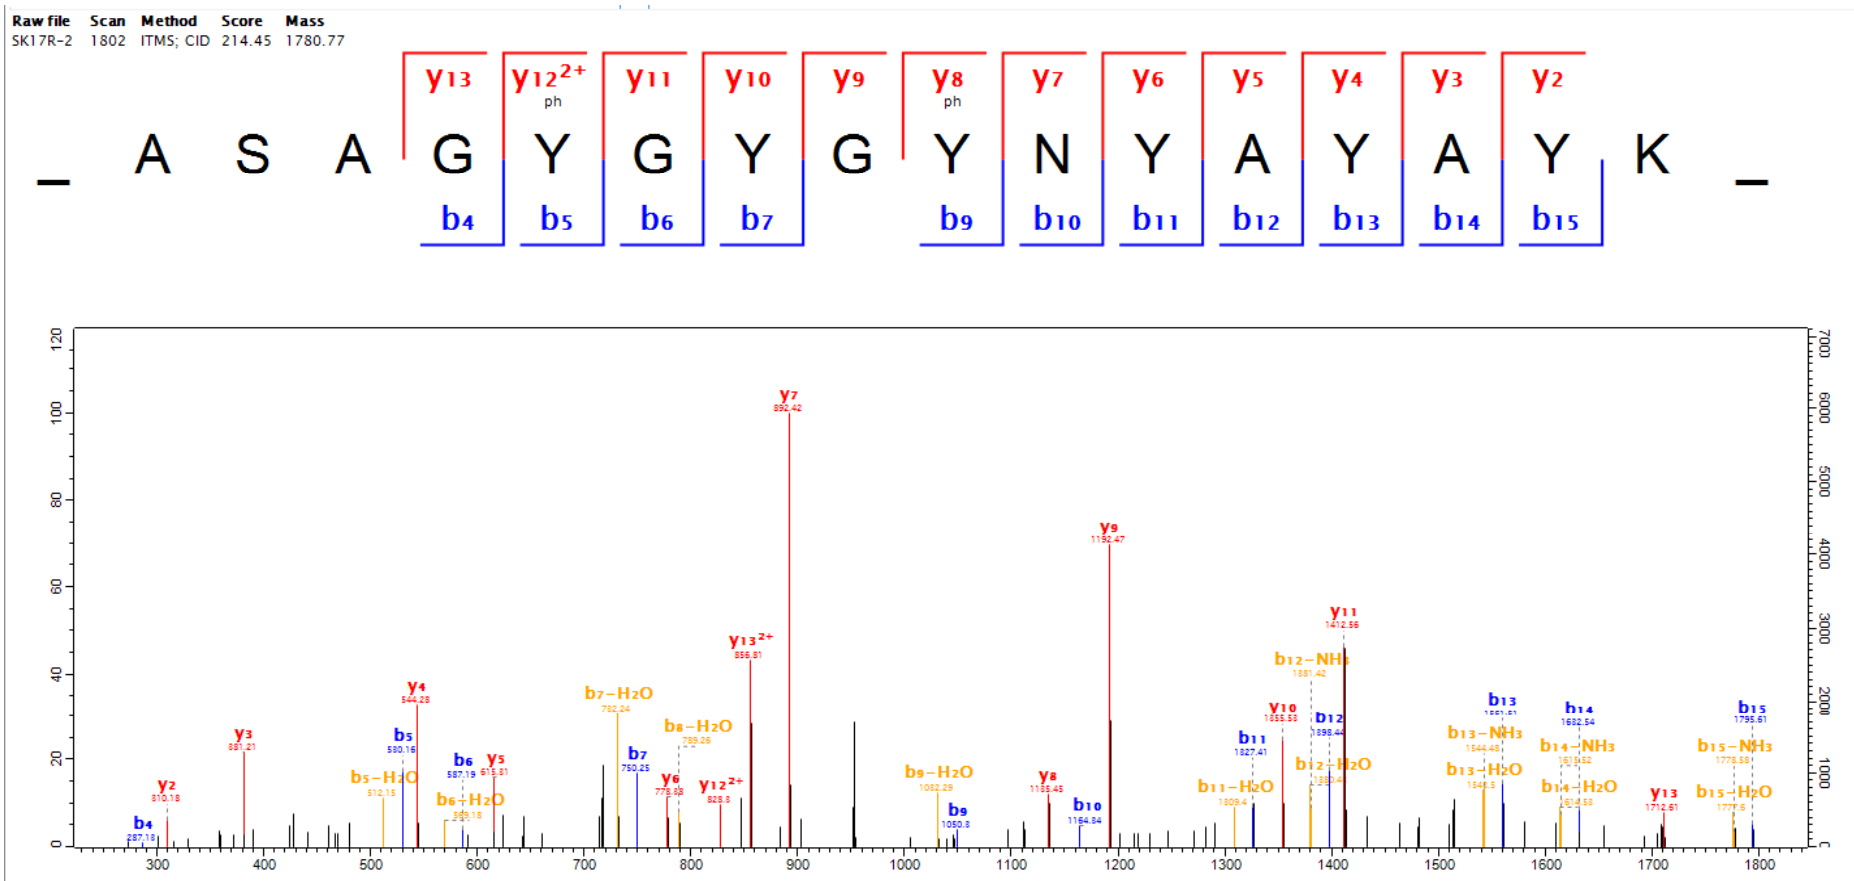

16-4

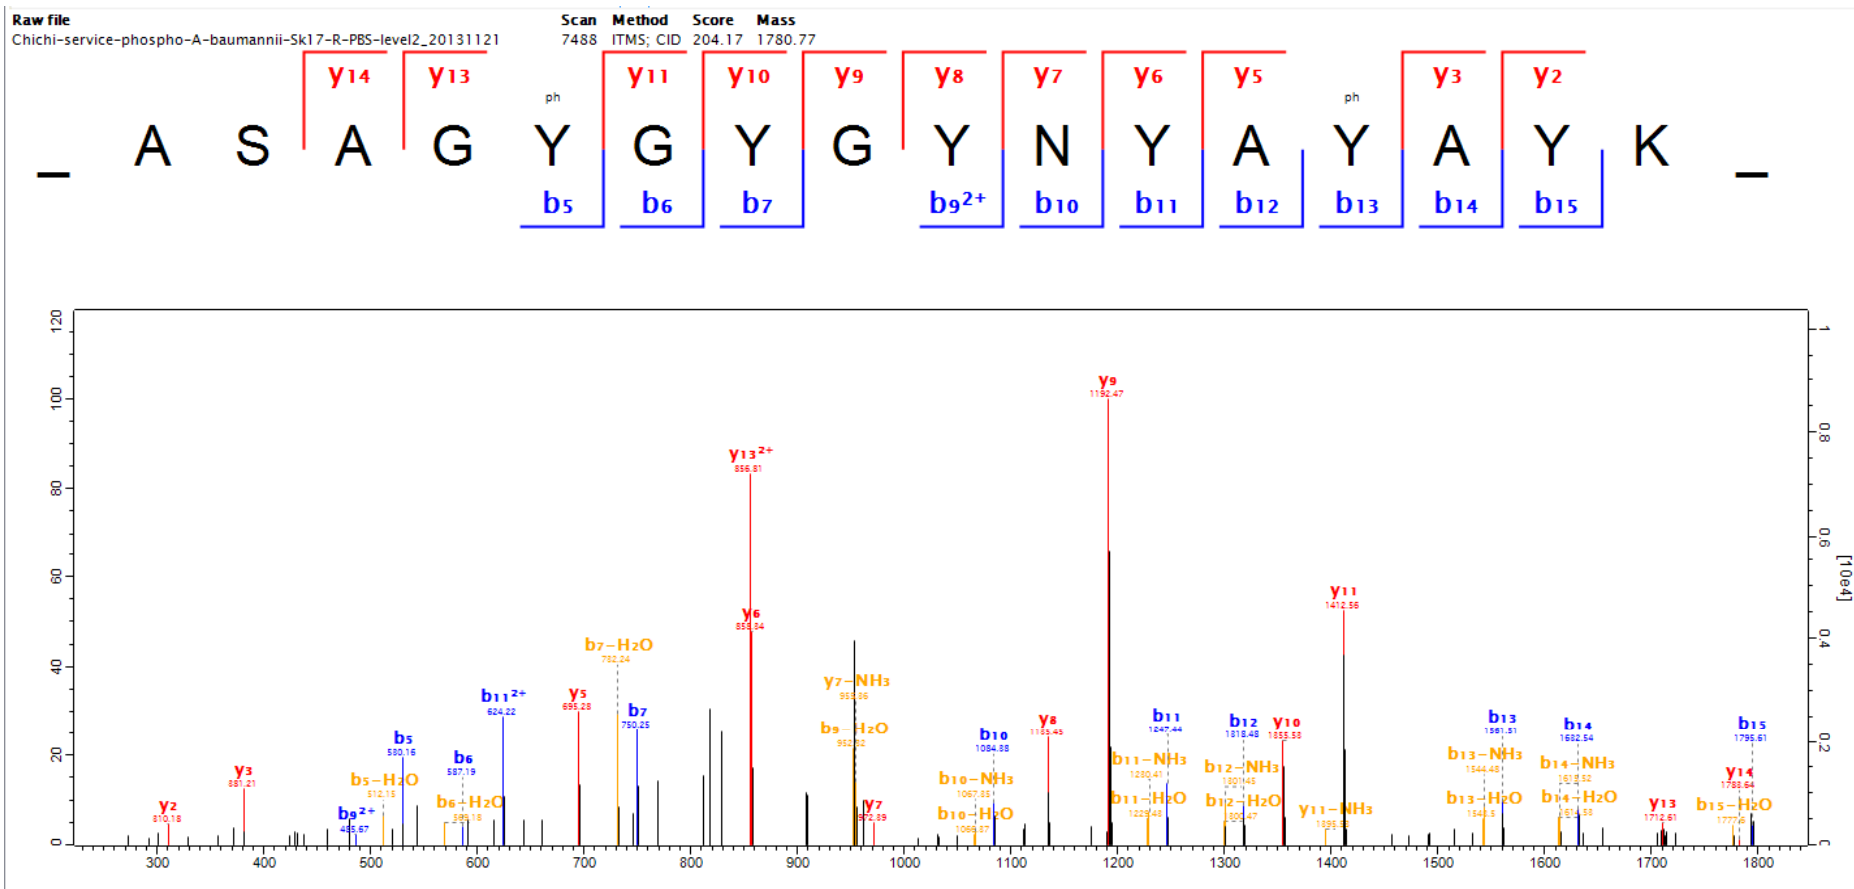

# 16-5

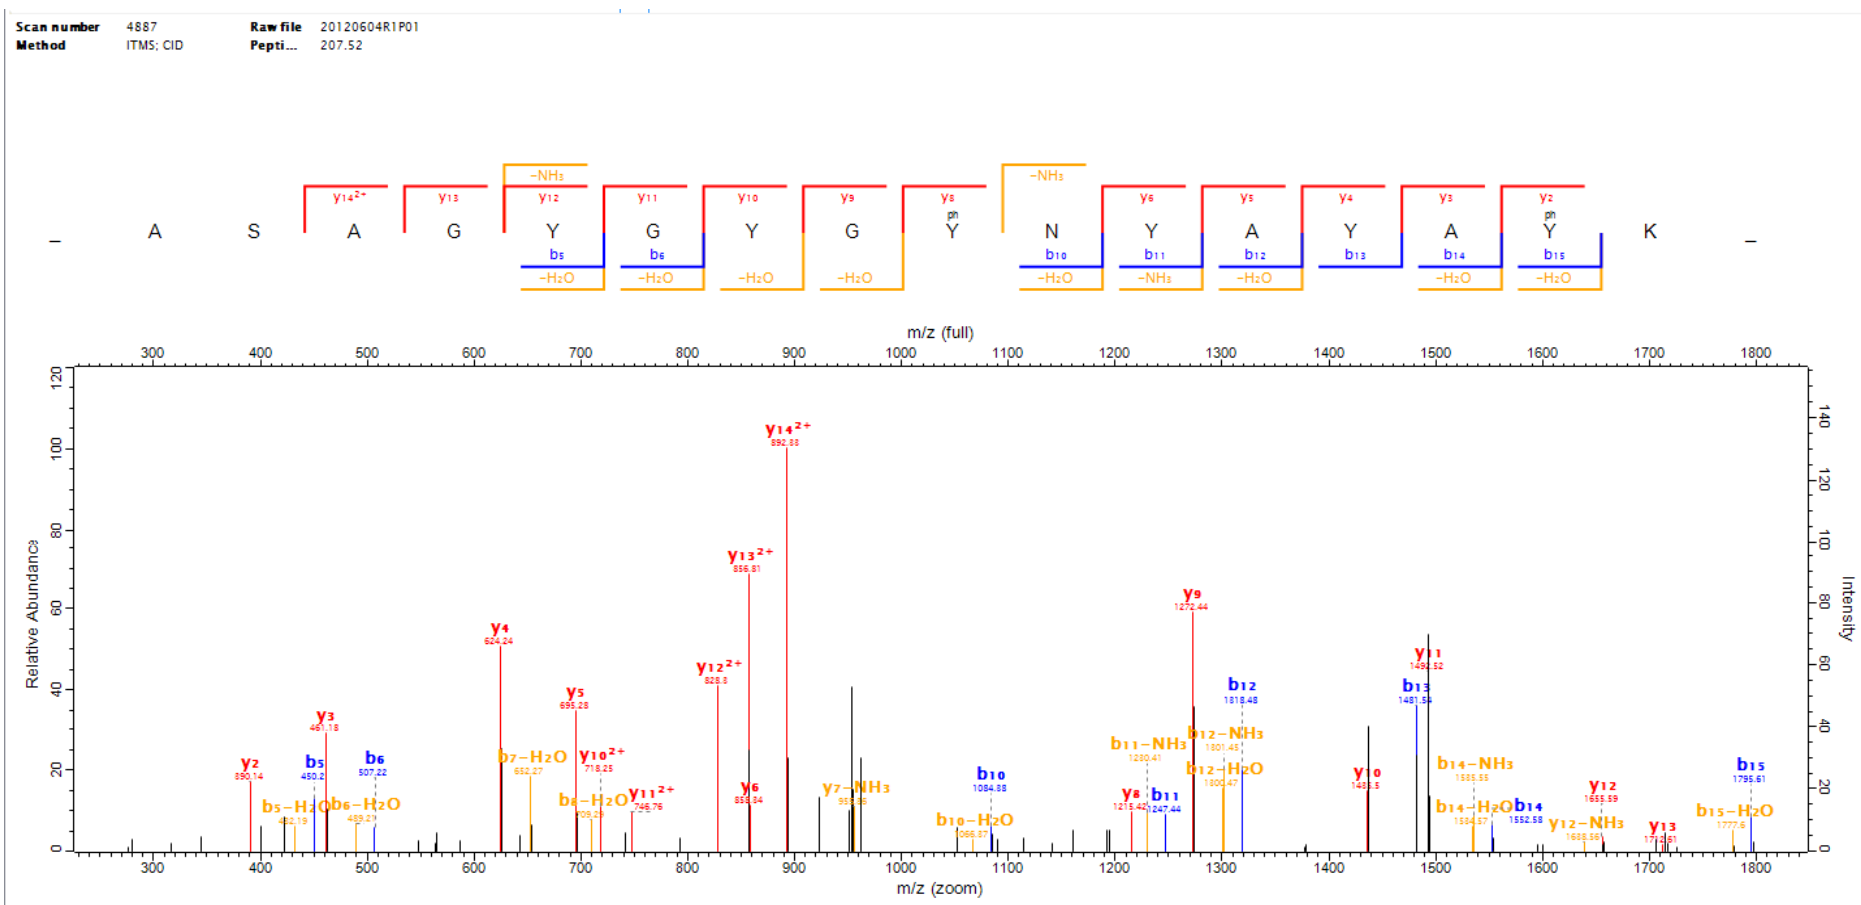

# 16-6

Scan number 3198 Raw file SK18-R-2  
 Method ITMS; CID Pepti... 83.83

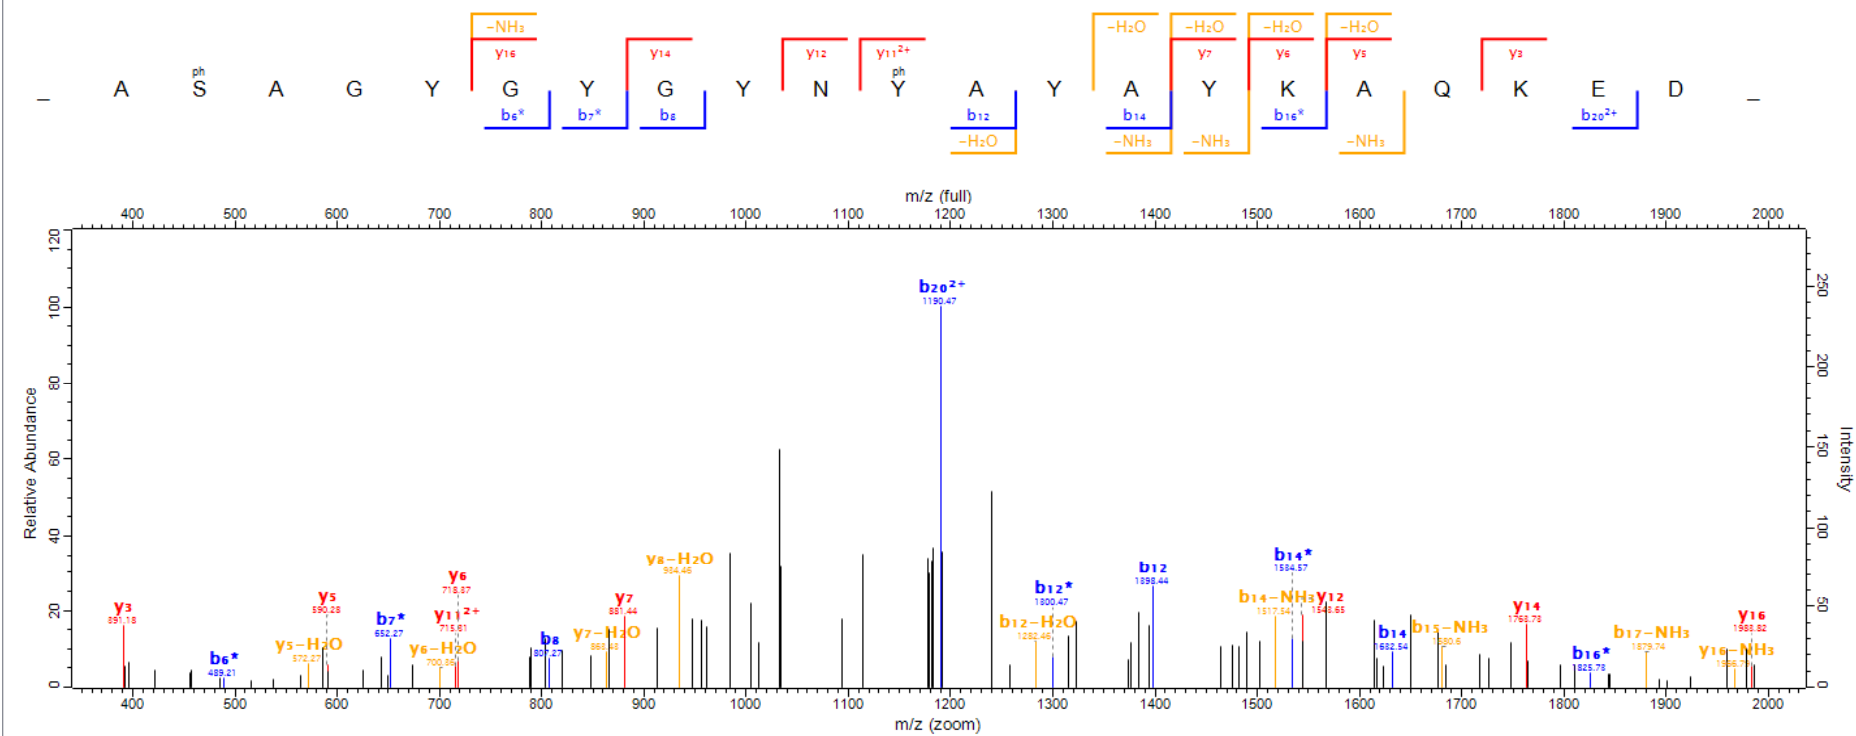

16-7

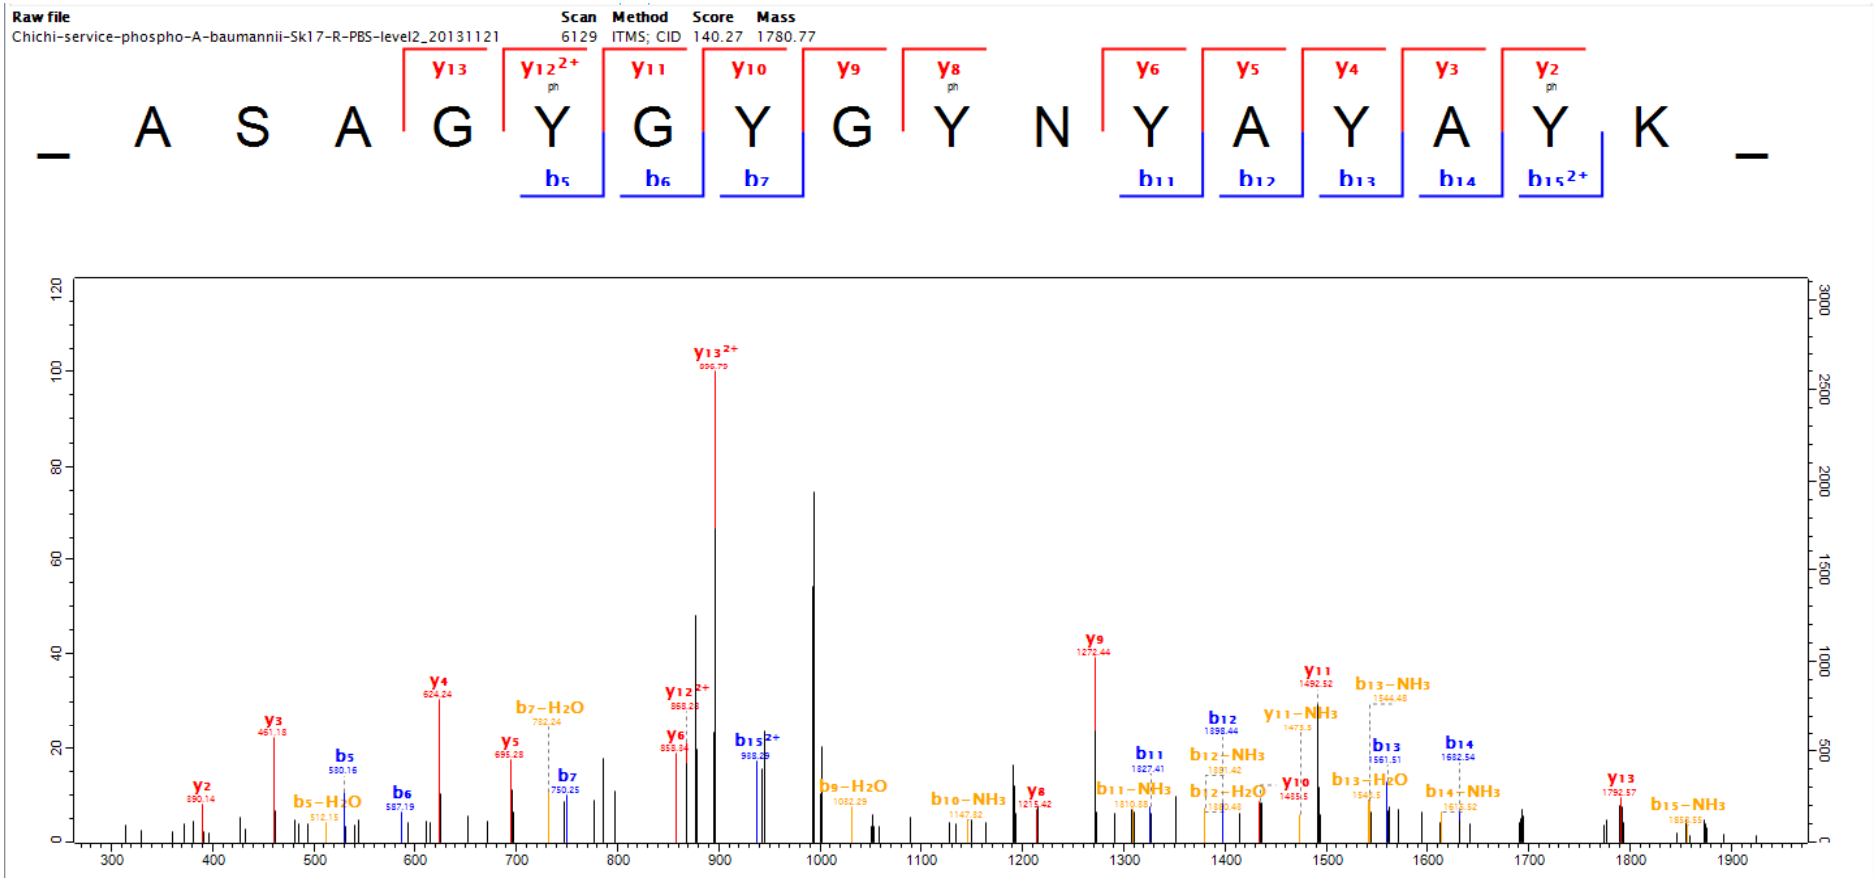



# 16-8

Raw file SK17R-3 Scan Method ITMS; CID 120.56 Score 2352.03 Mass

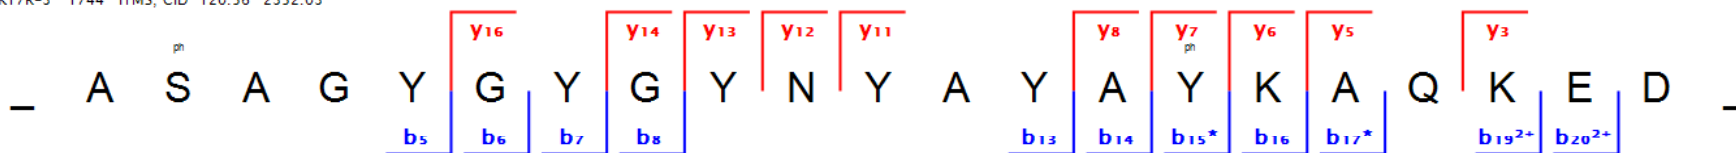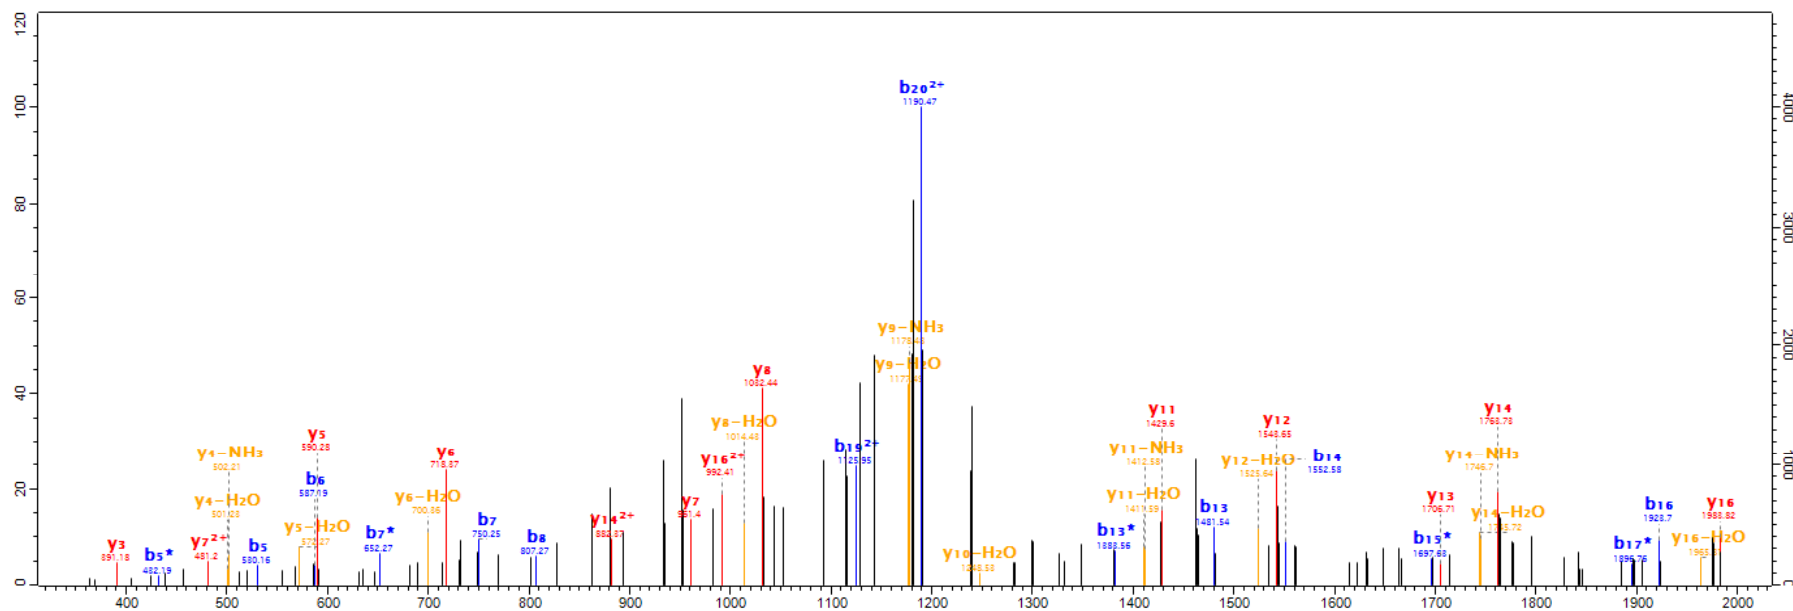

# 16-9

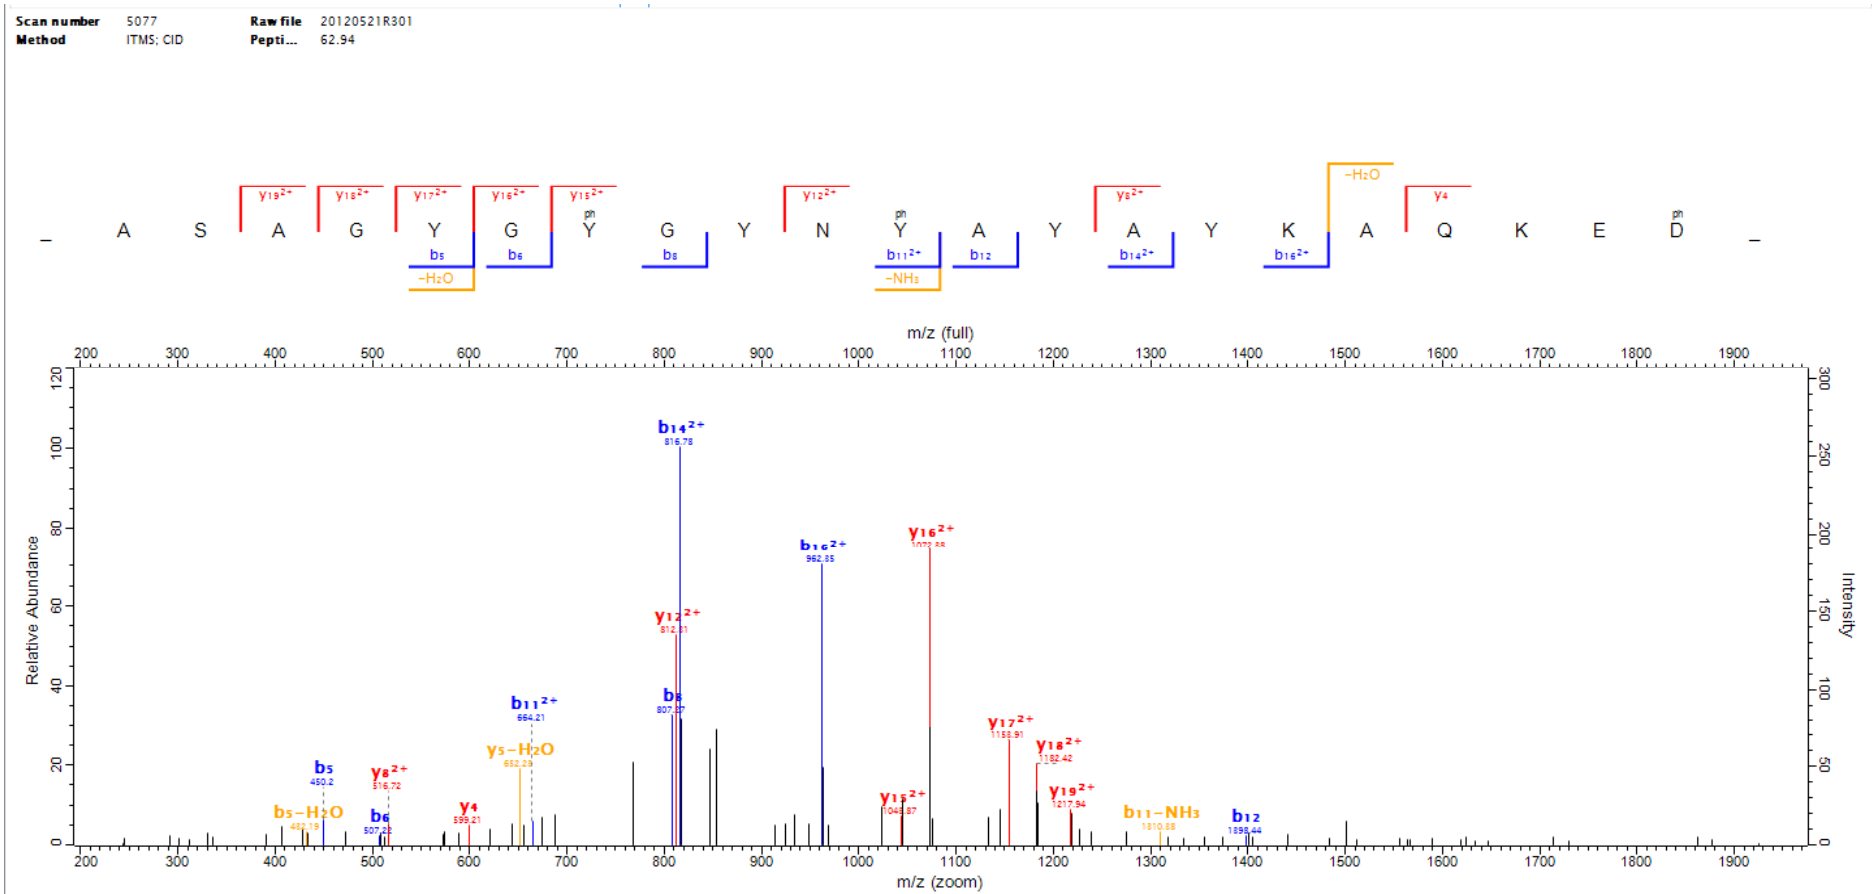

# 16-10

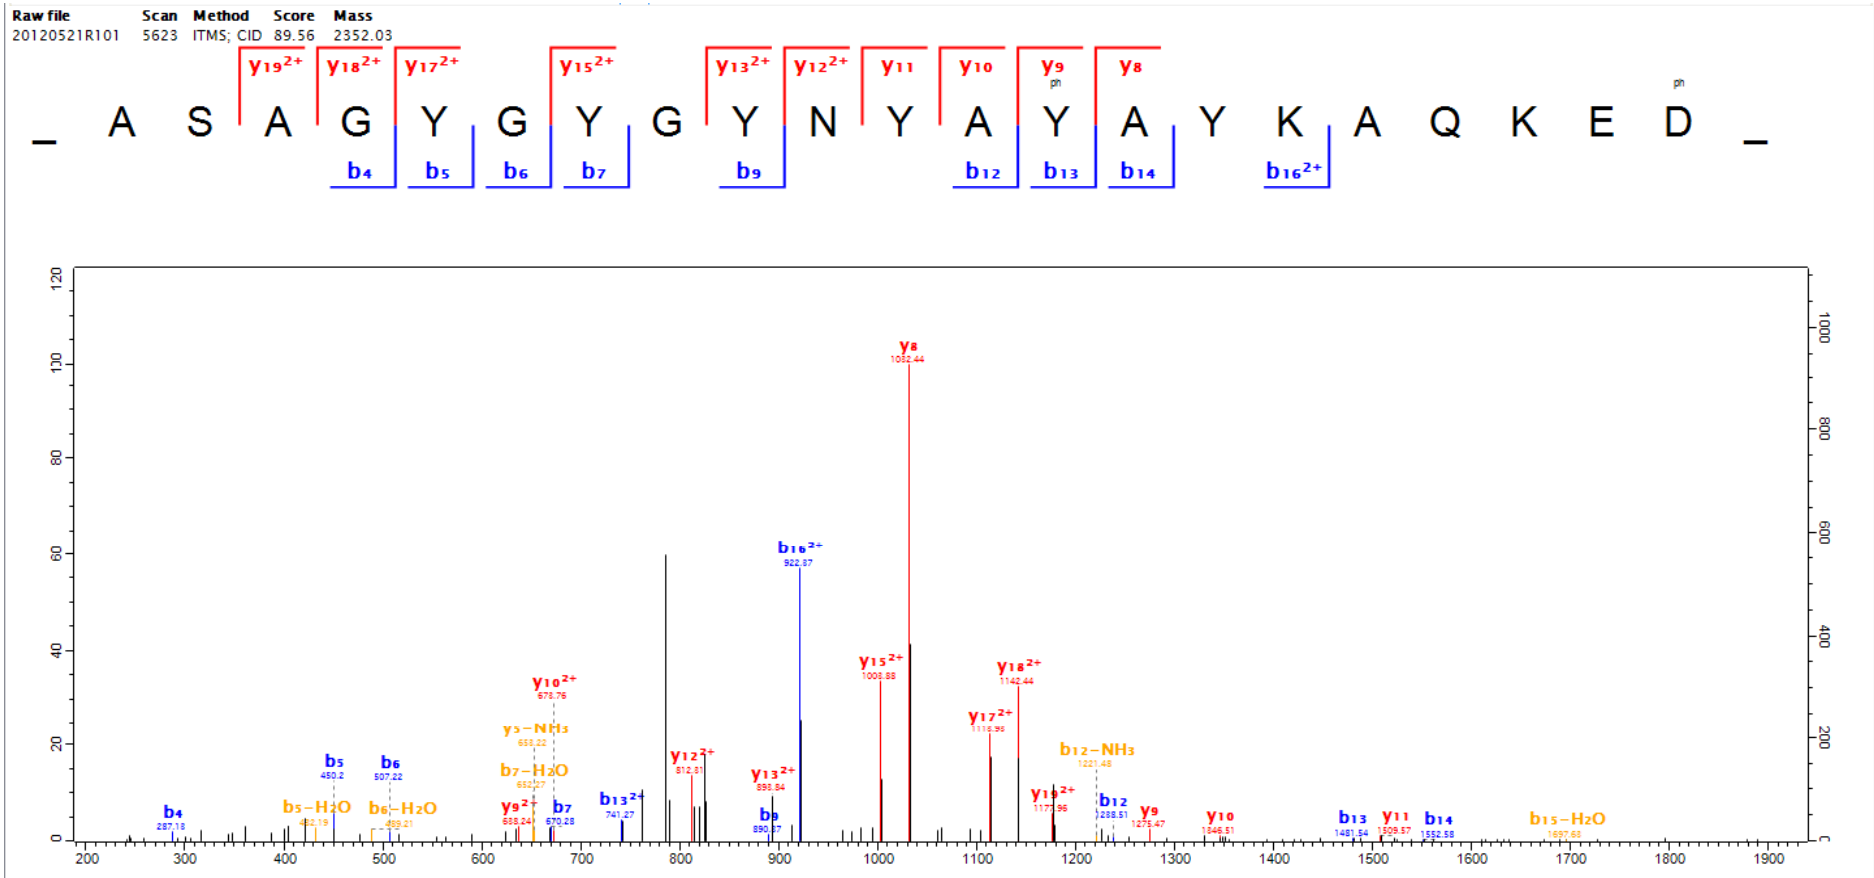

16-11

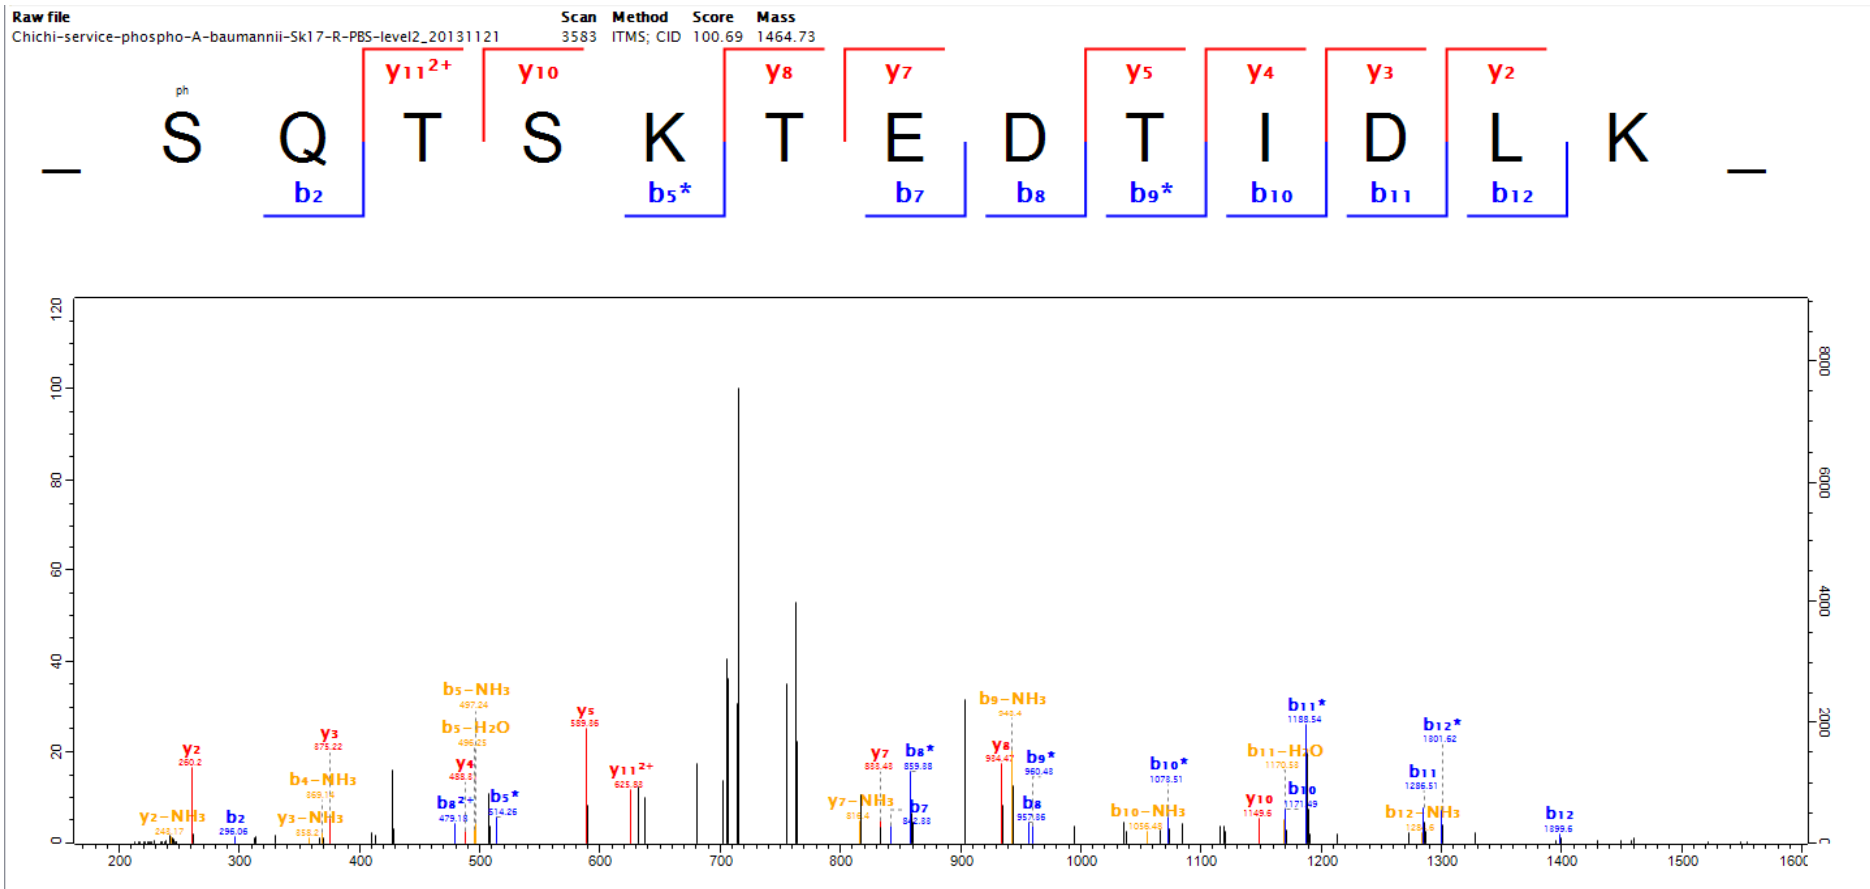

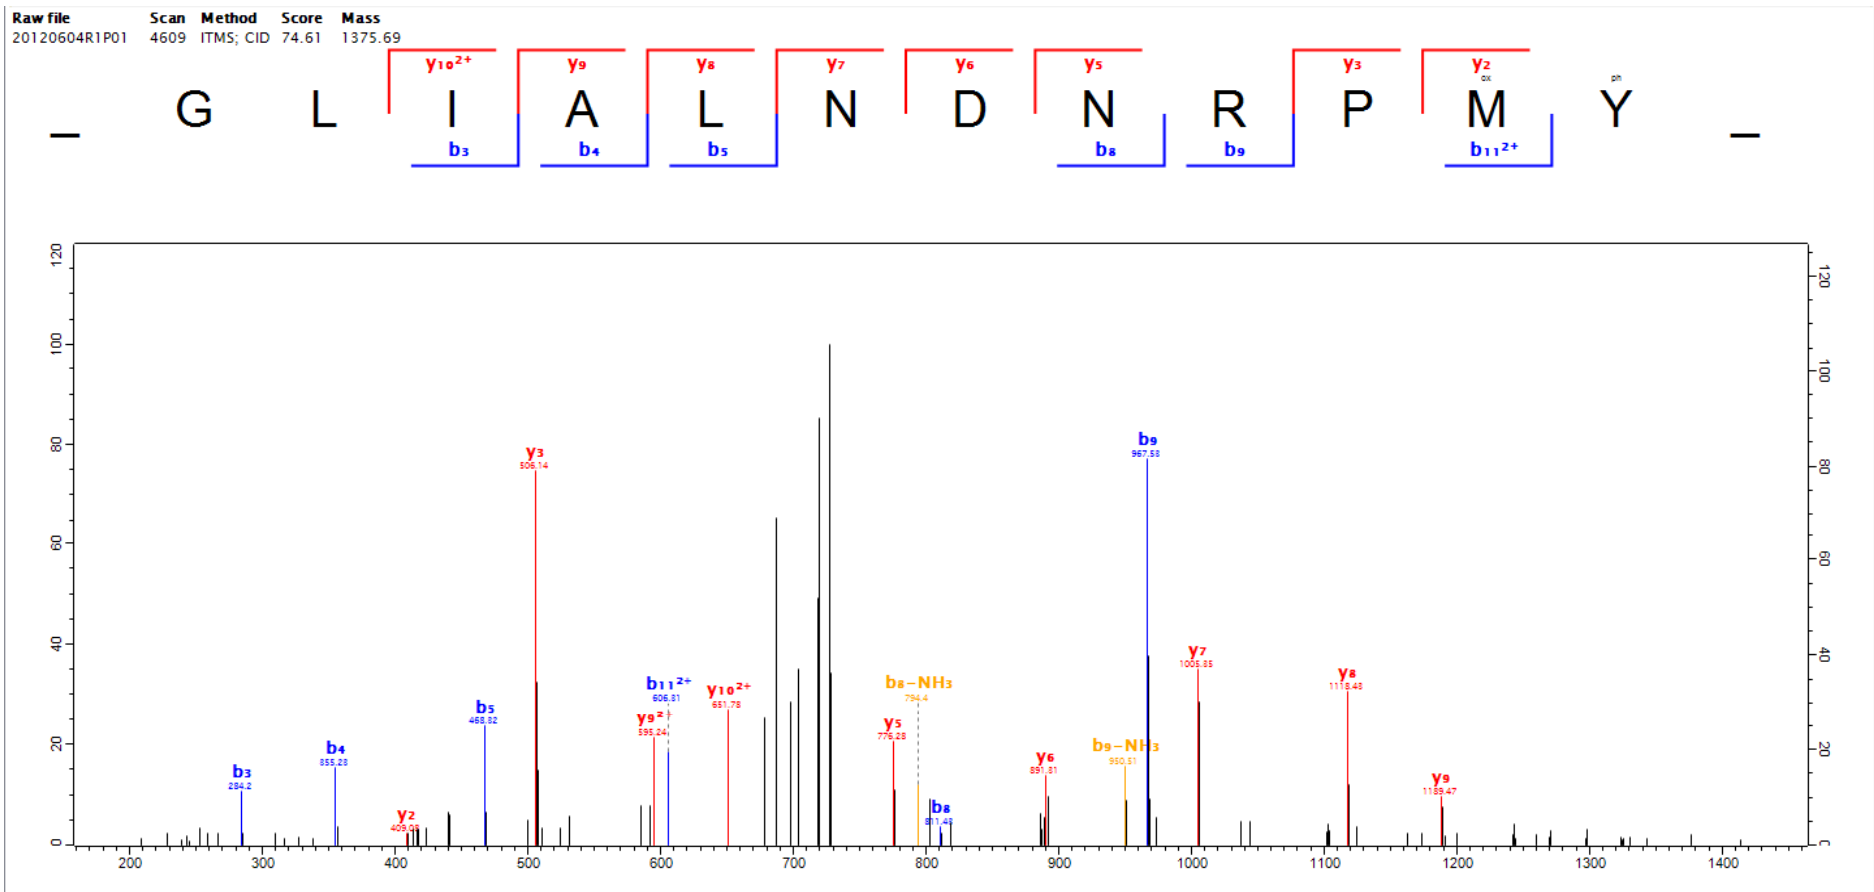

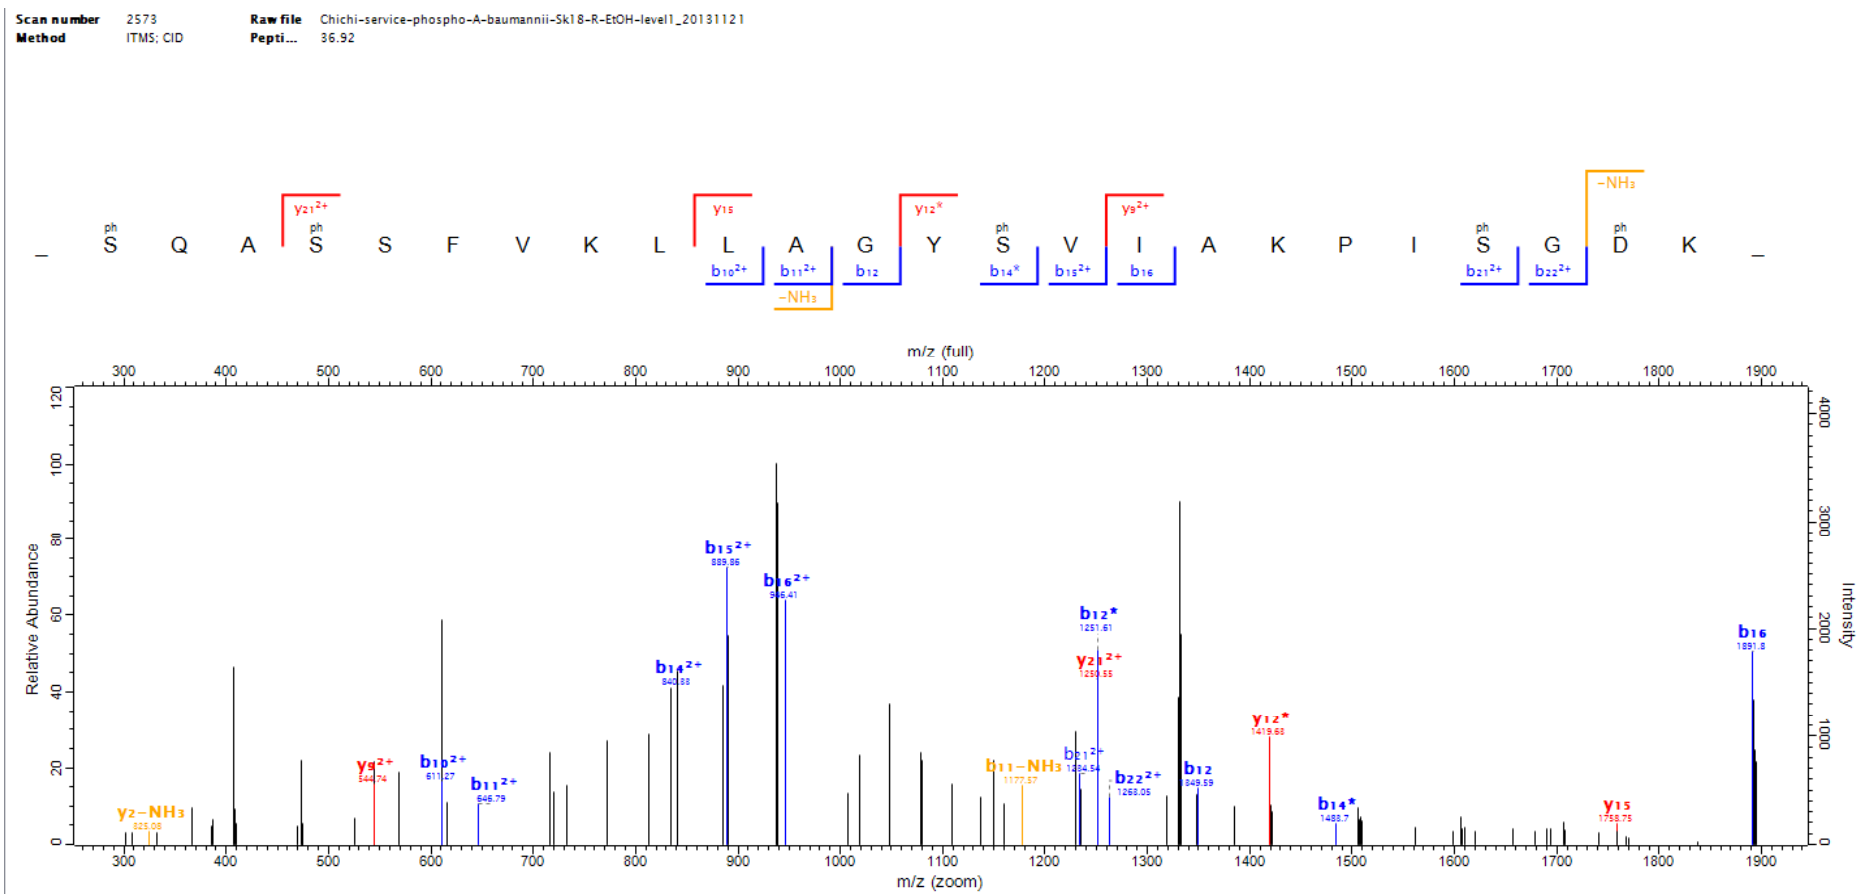

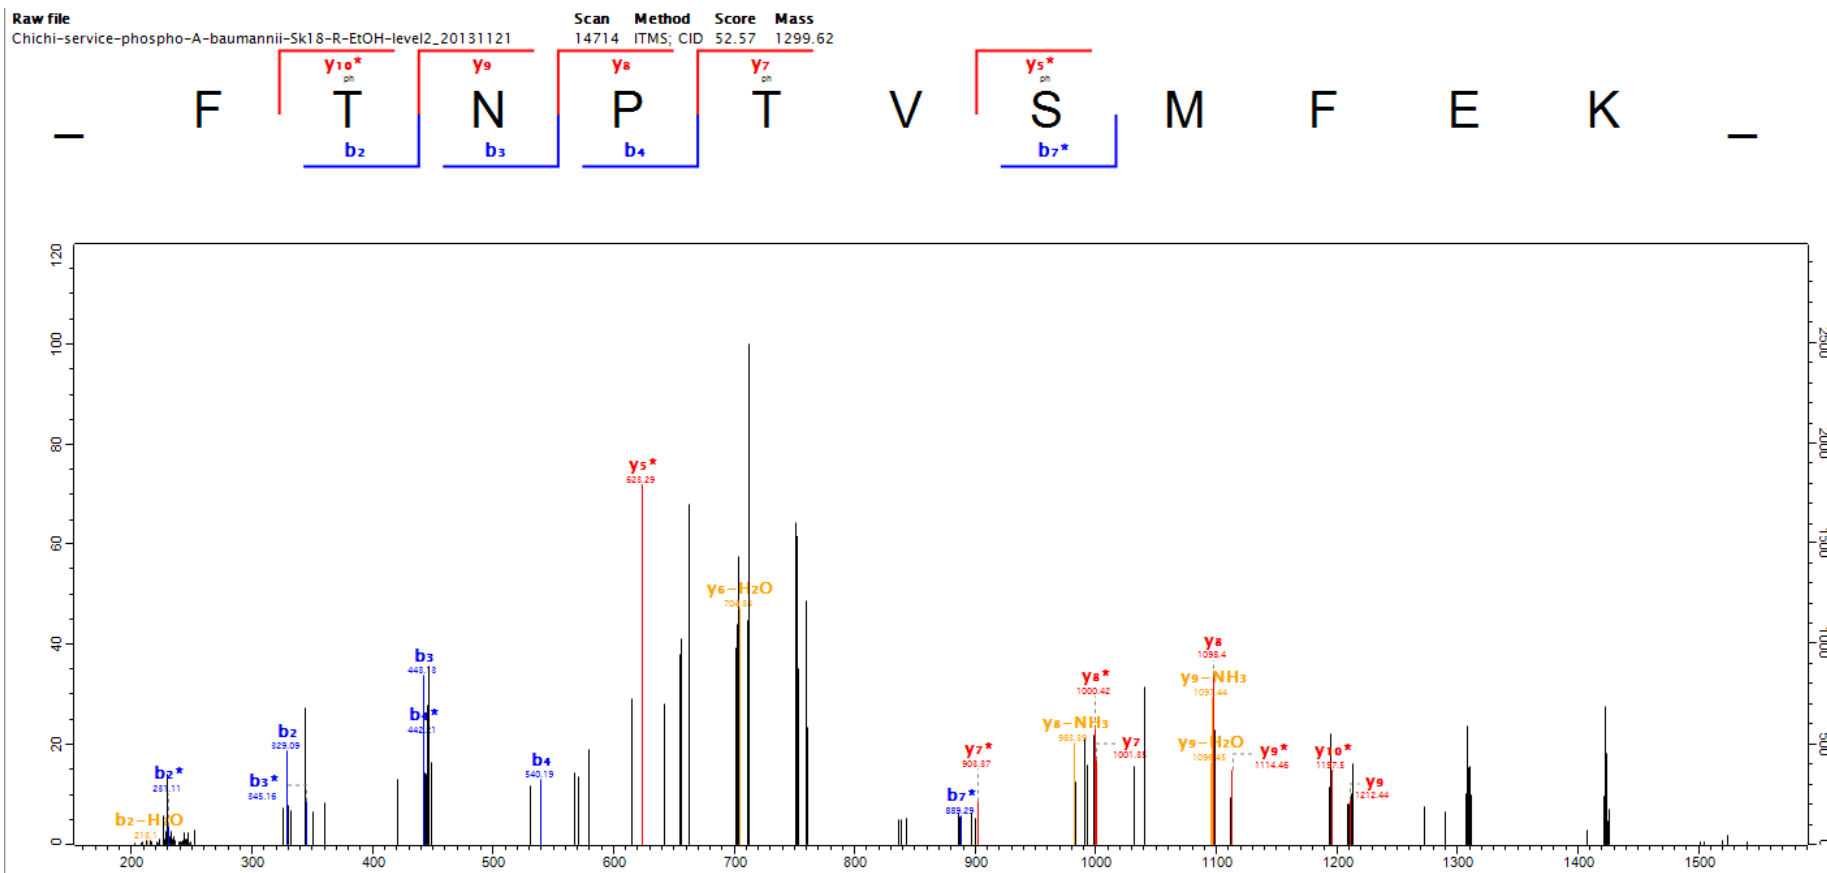

Scan number 1582 Raw file Chichi-service-phospho-A-baumannii-Sk18-R-PBS-level2\_20131121  
 Method ITMS: CID Pepti... 32.68

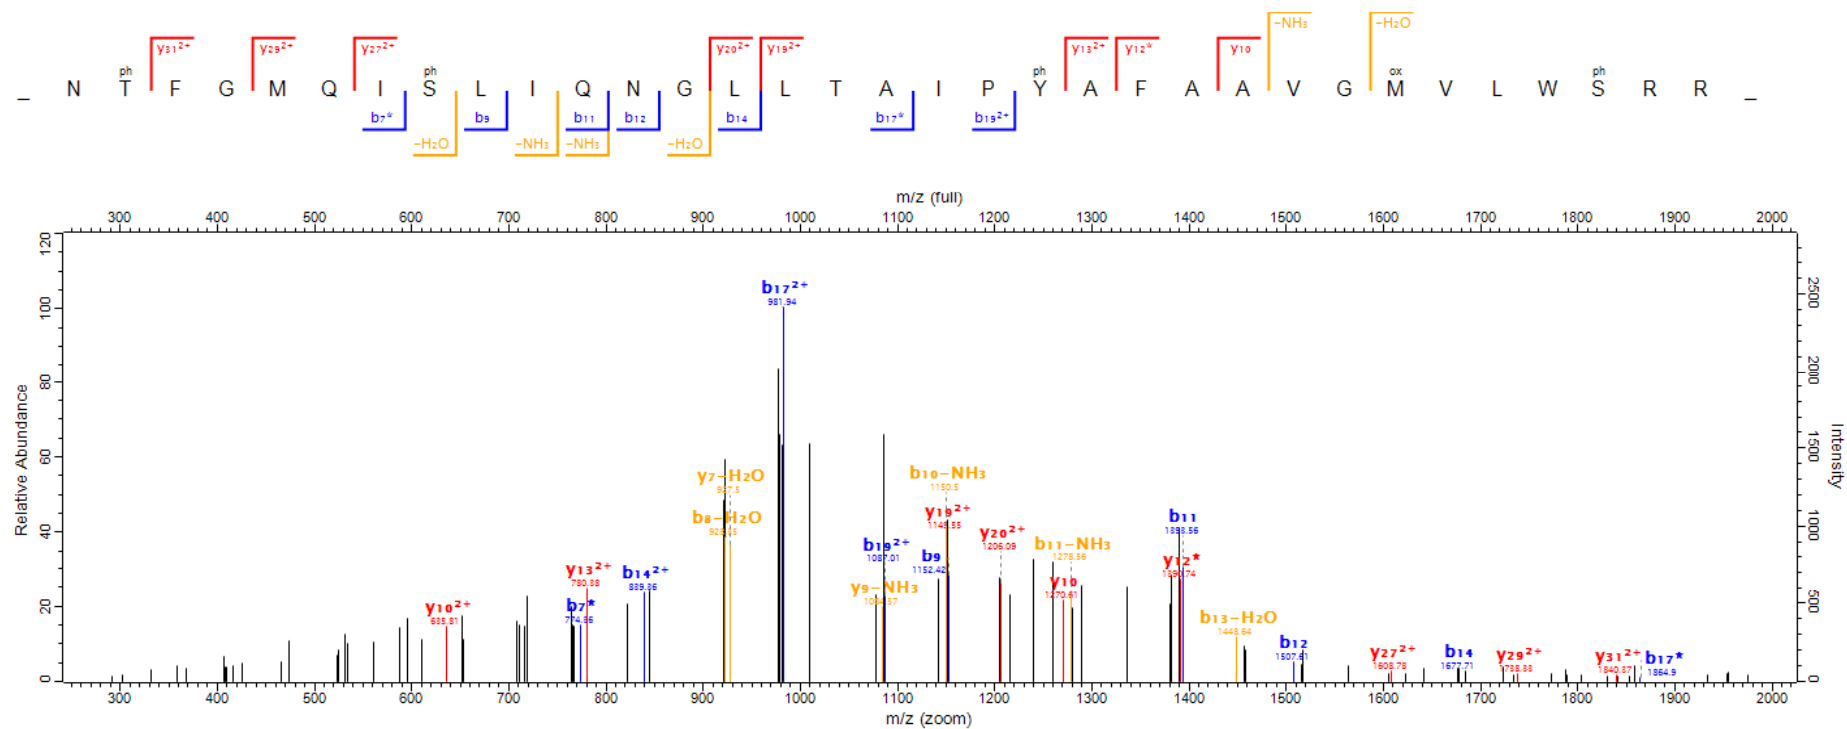



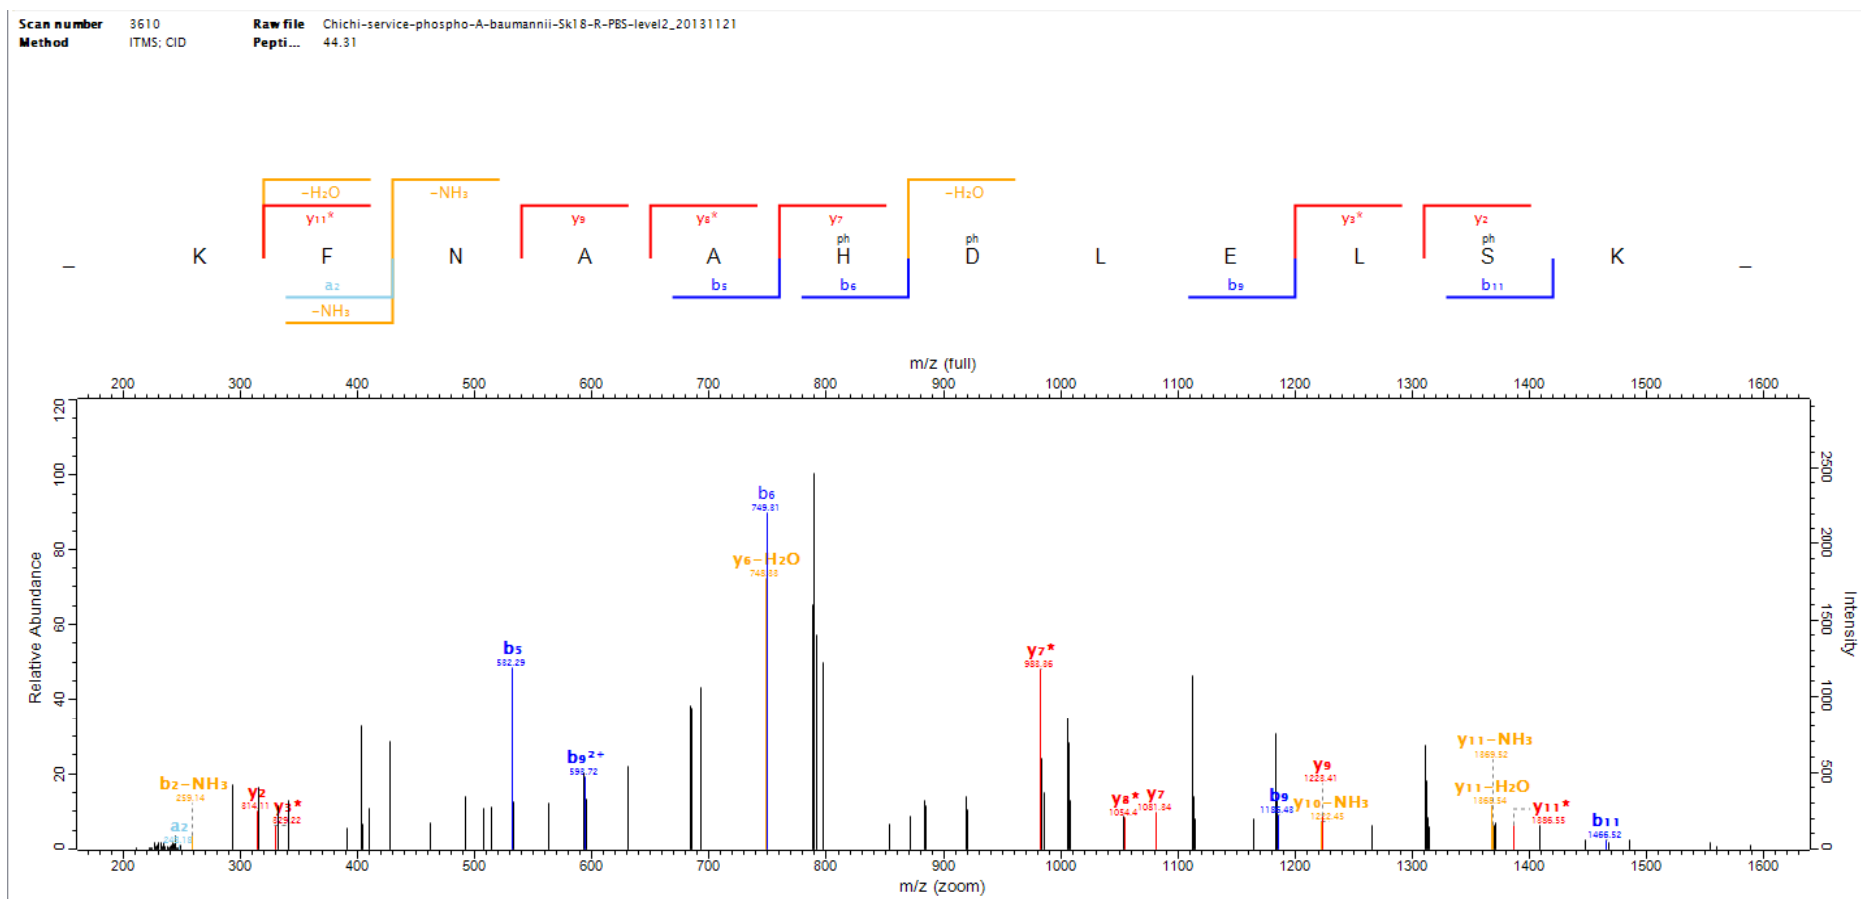

Scan number 11402 Raw file Chichi-service-phospho-A-baumannii-Sk17-R-PBS-level1\_20131121  
 Method ITMS: CID Pepti... 62.38

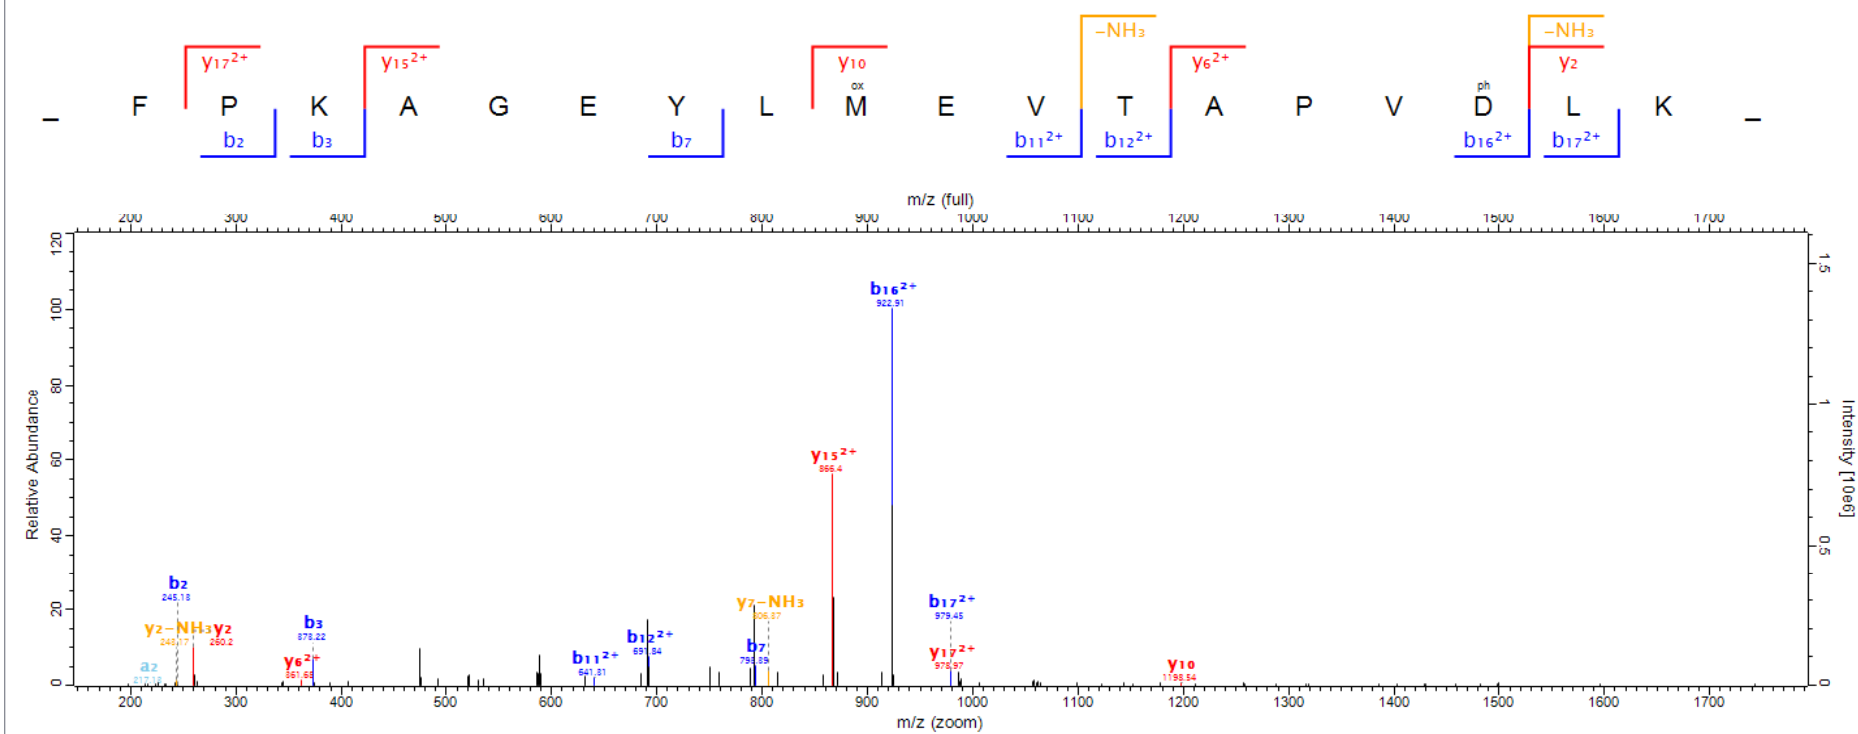

Scan number 6358 Raw file Chichi-service-phospho-A-baumannii-Sk17-R-EtOH-level2\_20131121  
 Method ITMS: CID Pepti... 92.8

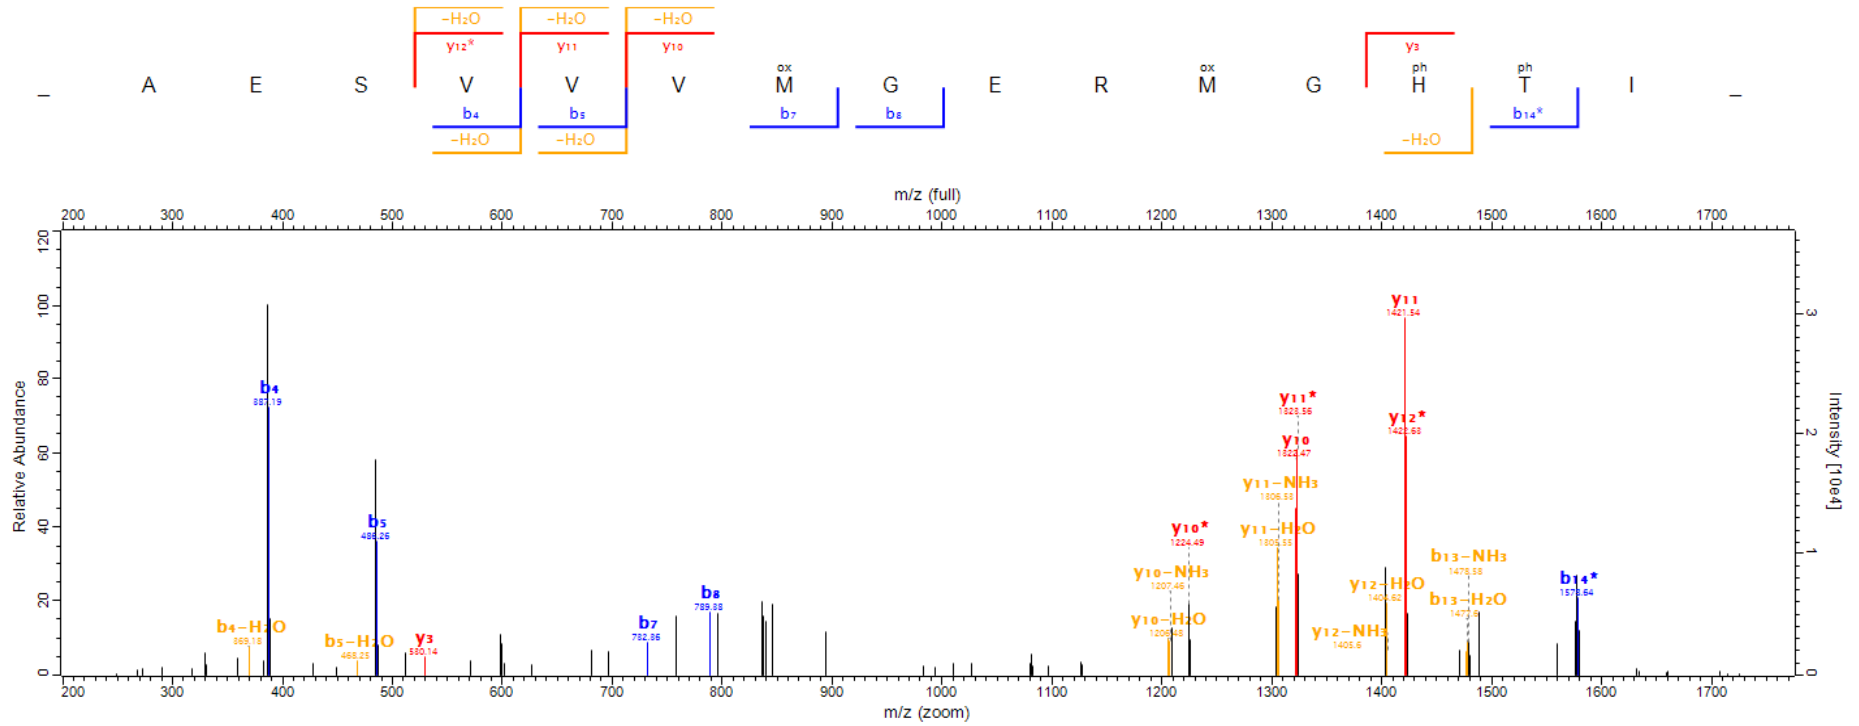

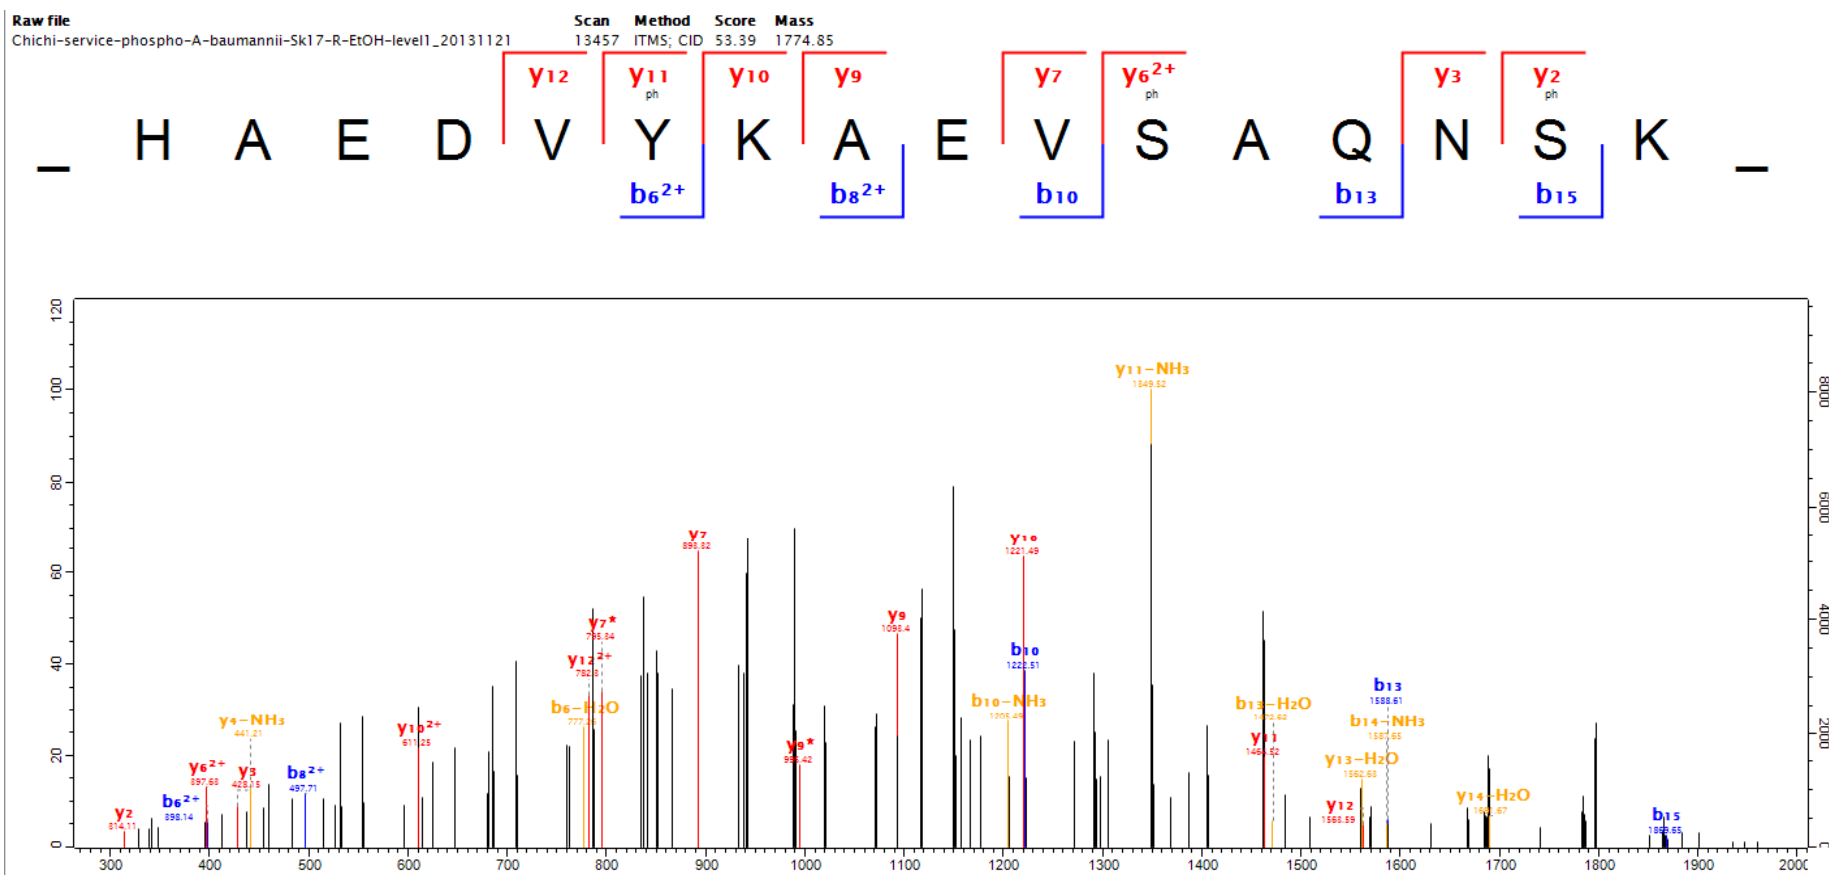

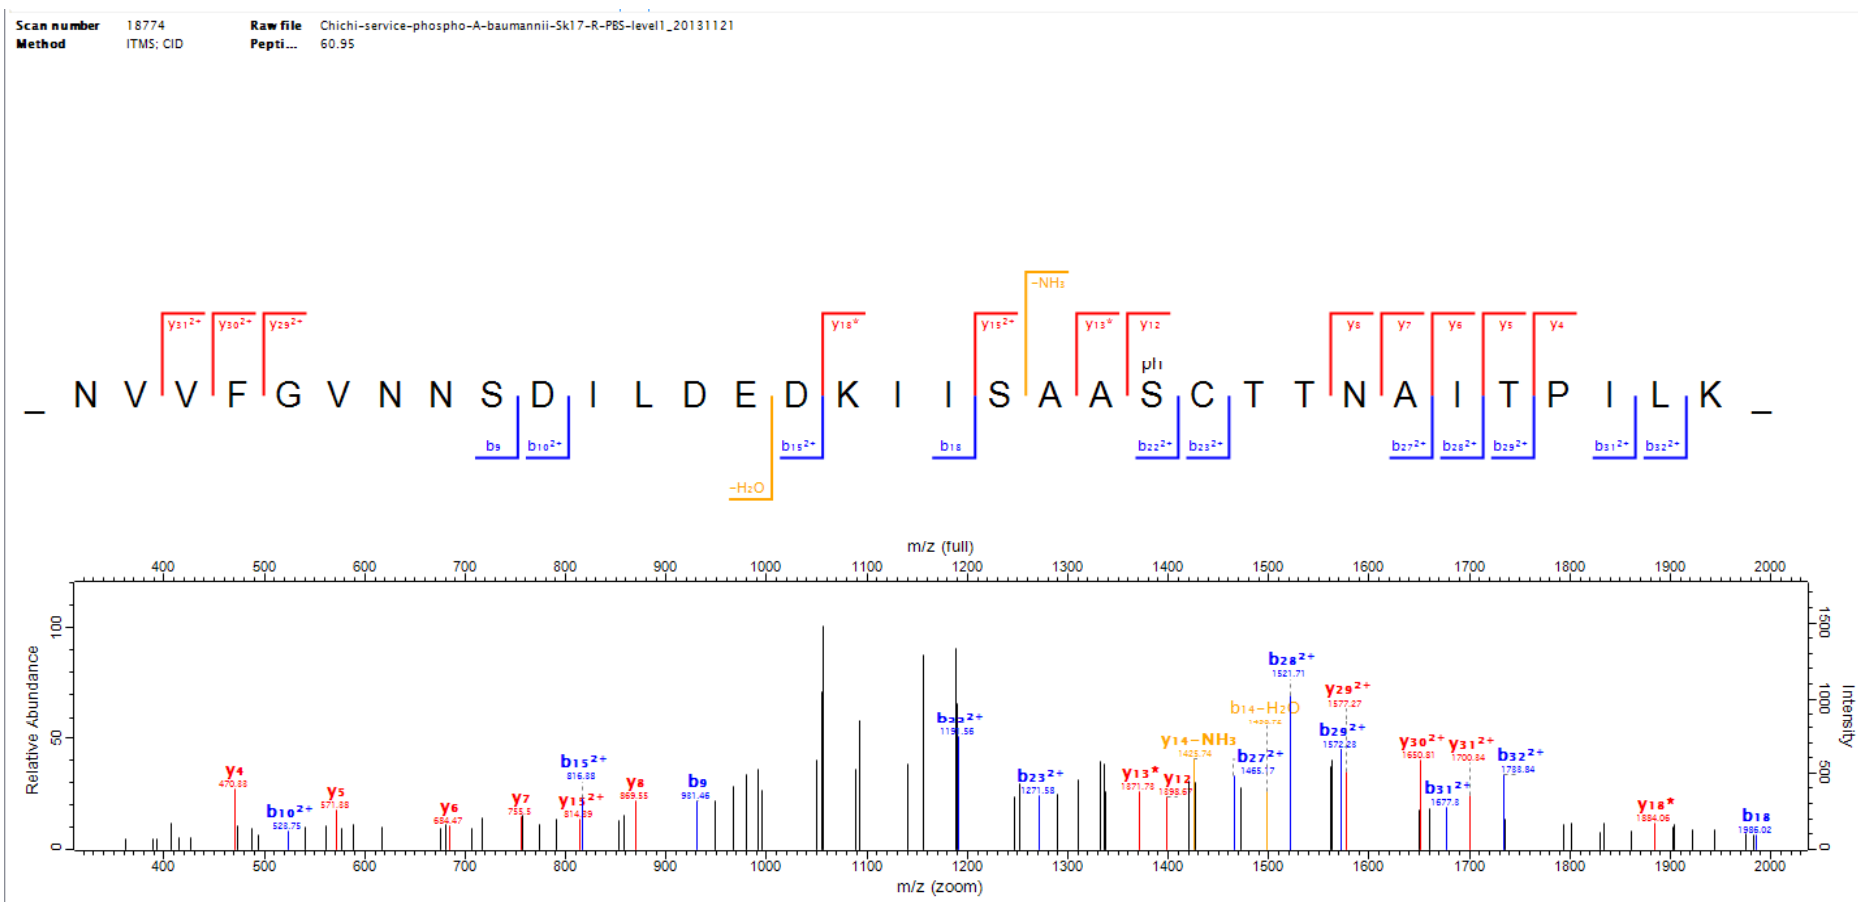

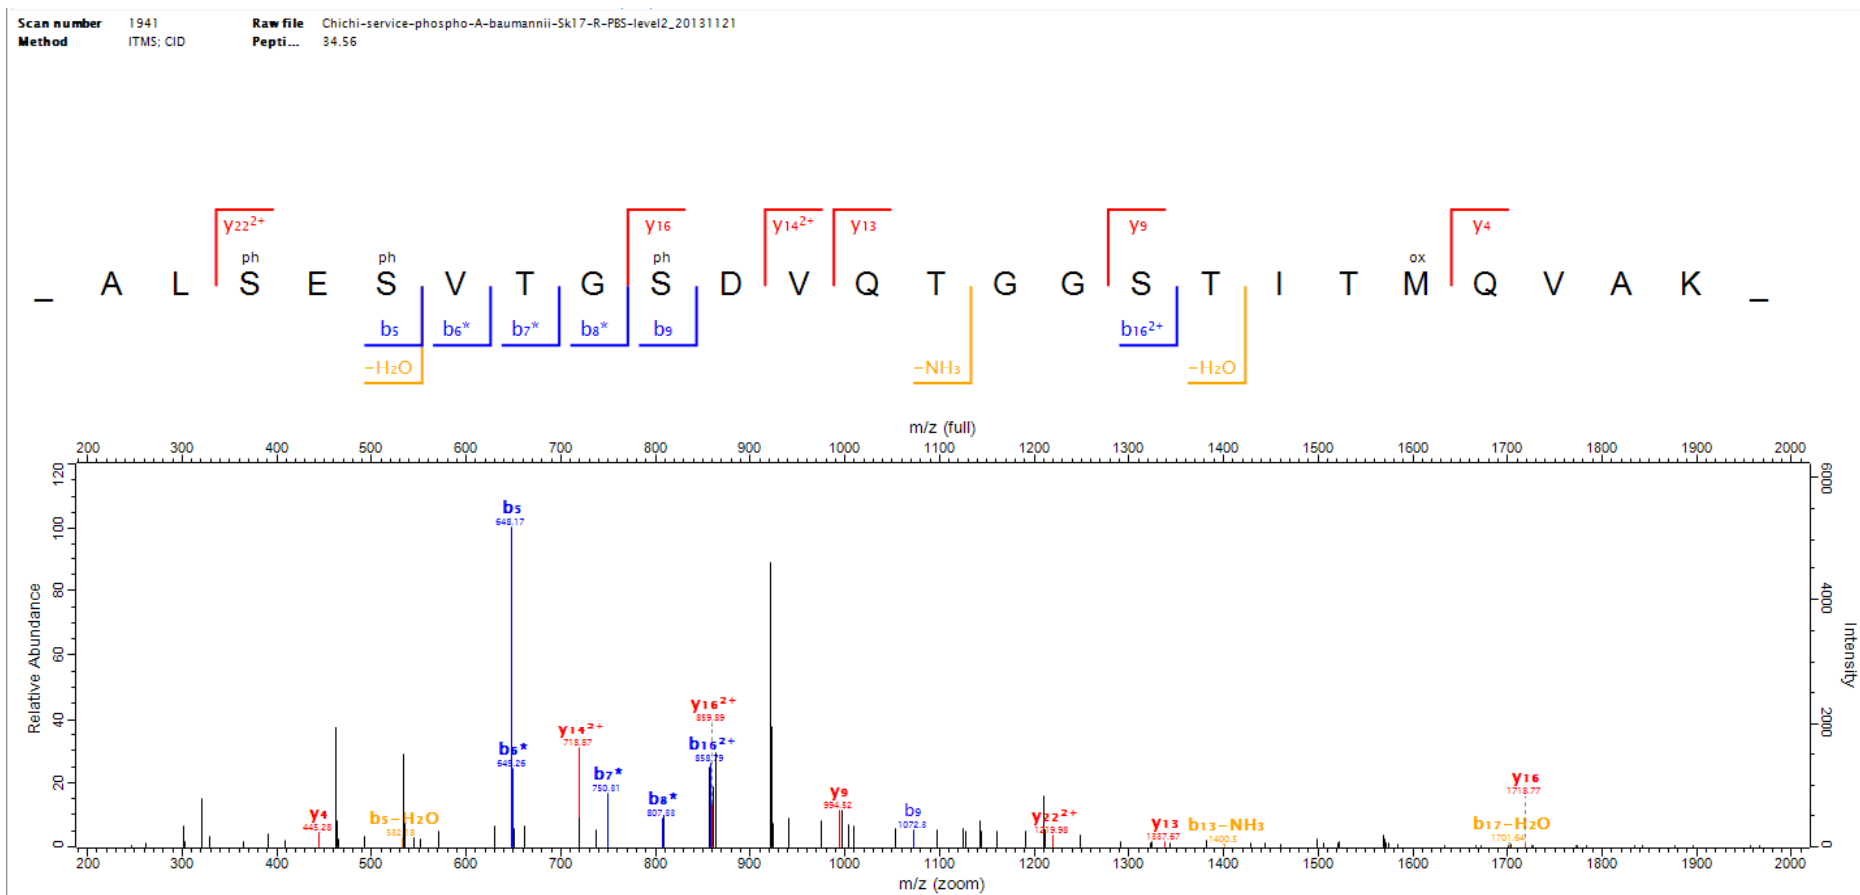

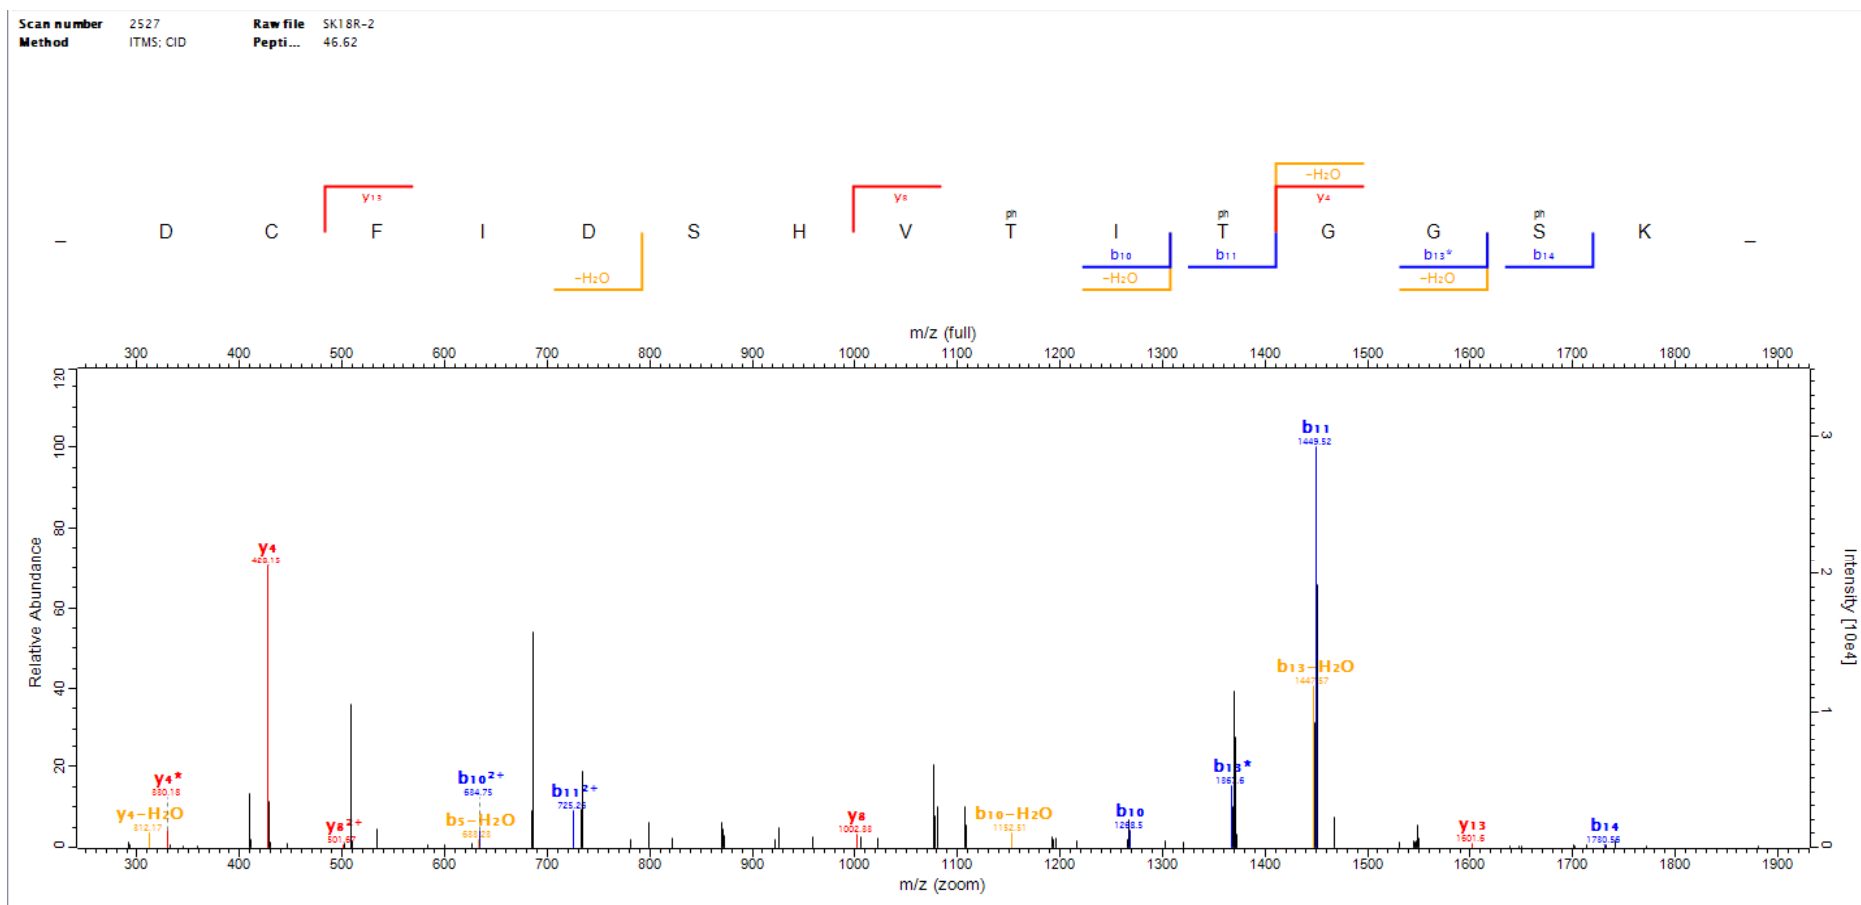

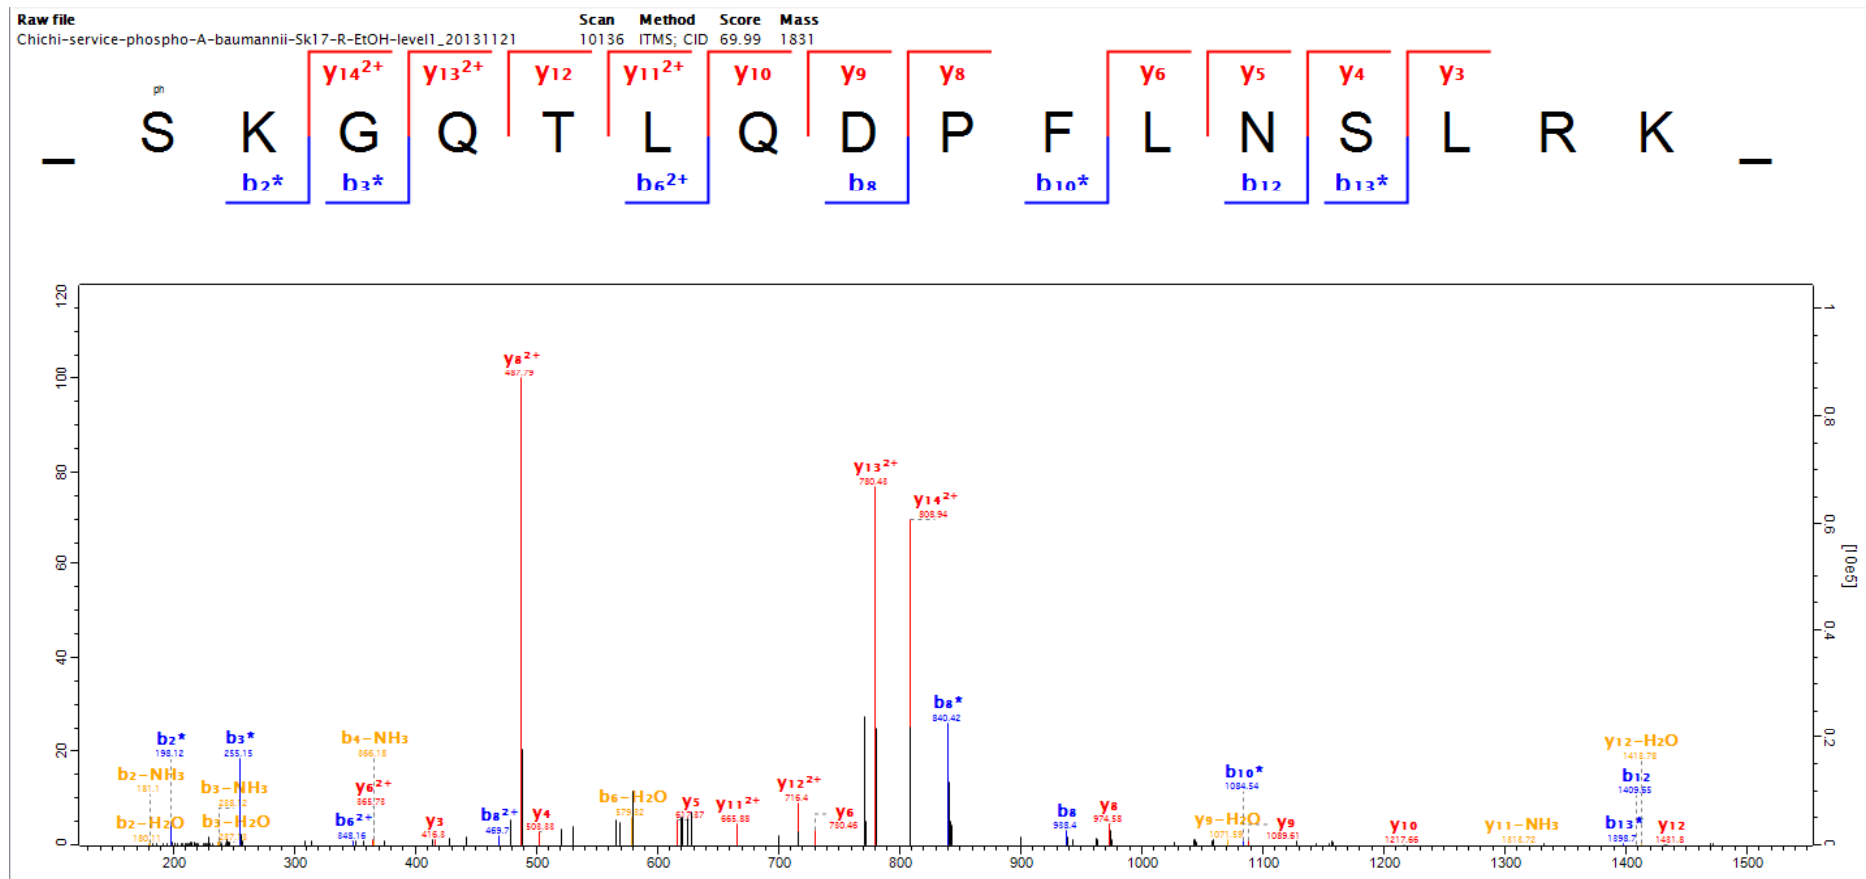



Scan number 13242 Raw file Chichi-service-phospho-A-baumannii-Sk17-R-EtOH-level2\_20131121  
 Method ITMS: CID Pepti... 46.89

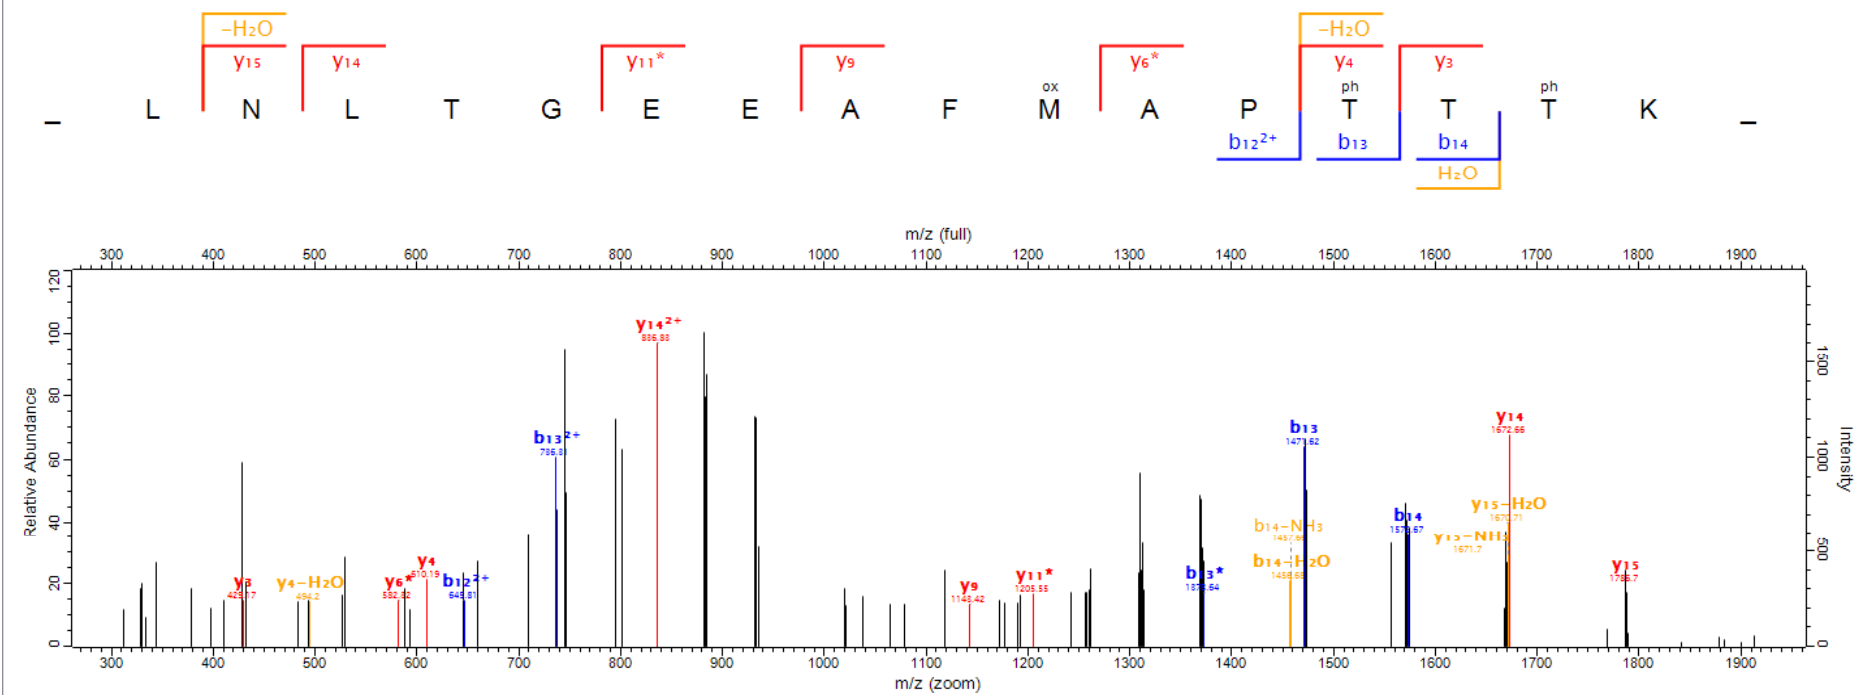

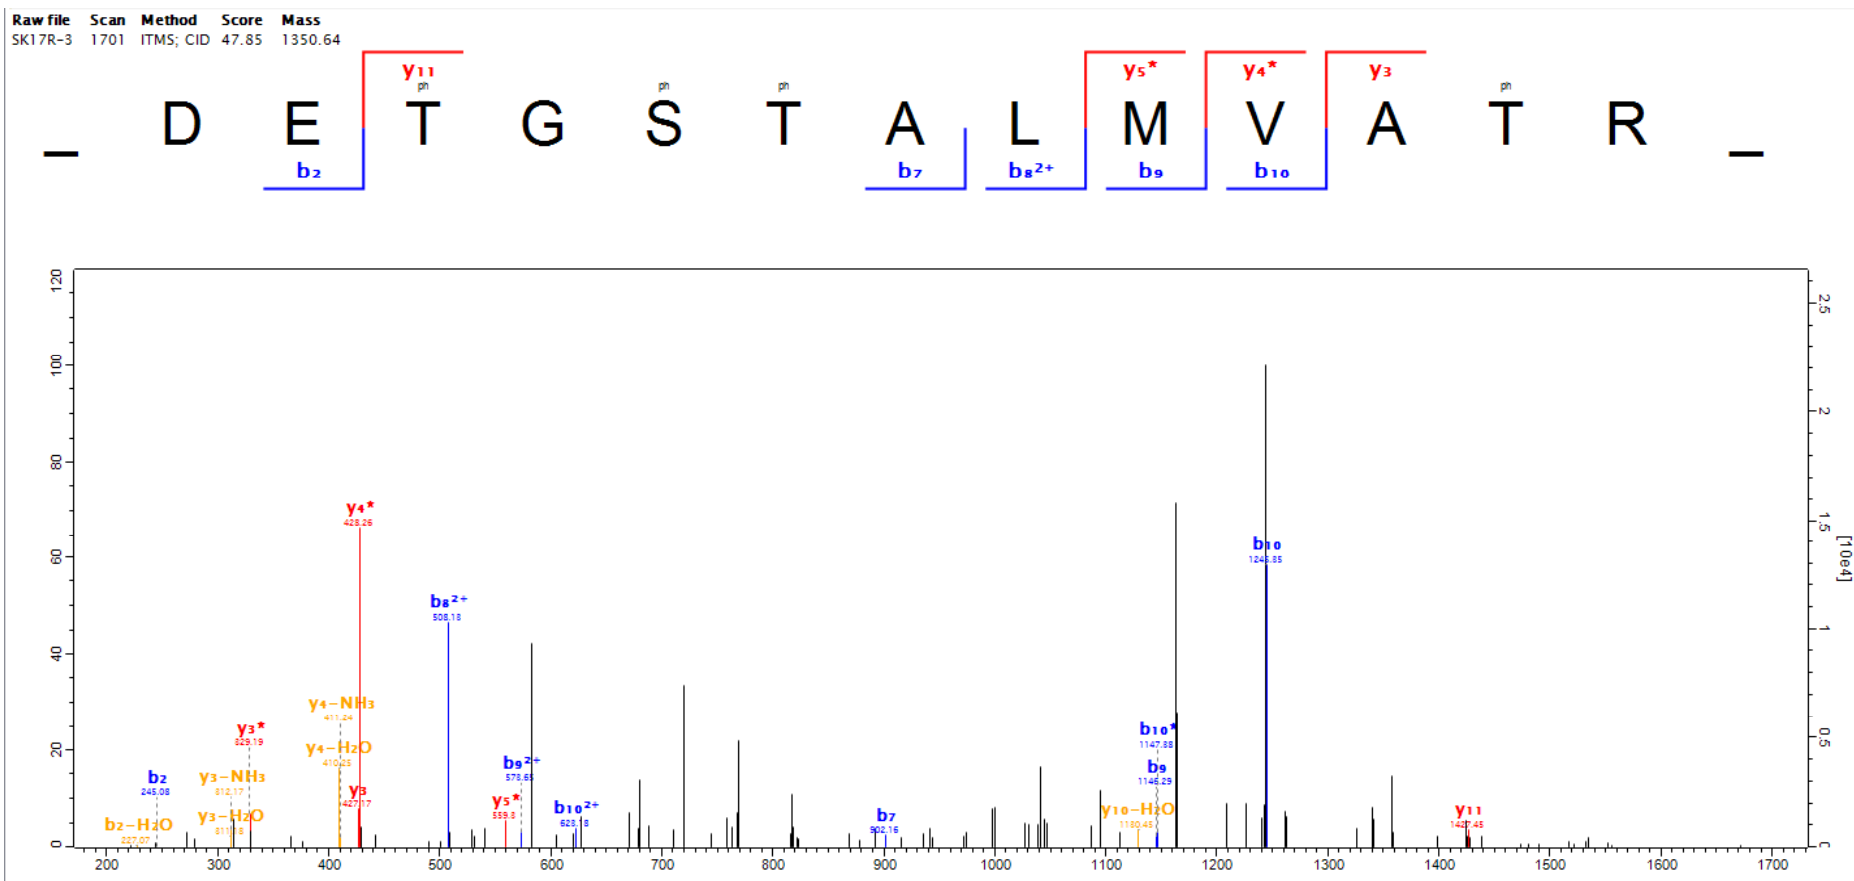

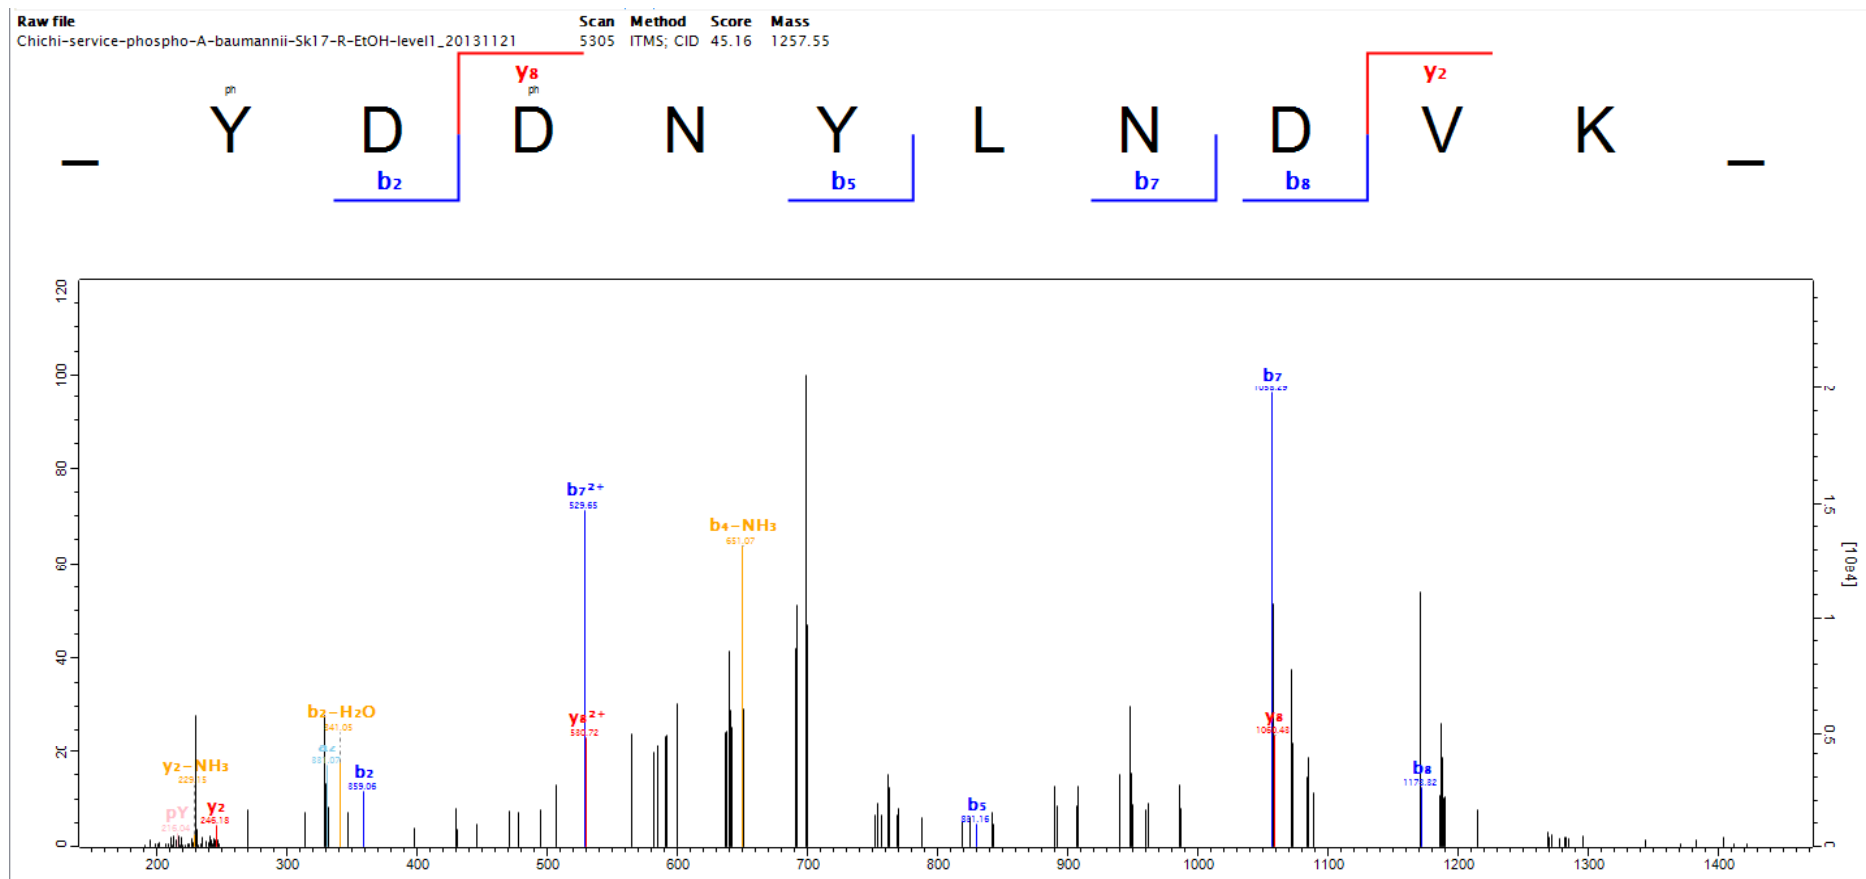

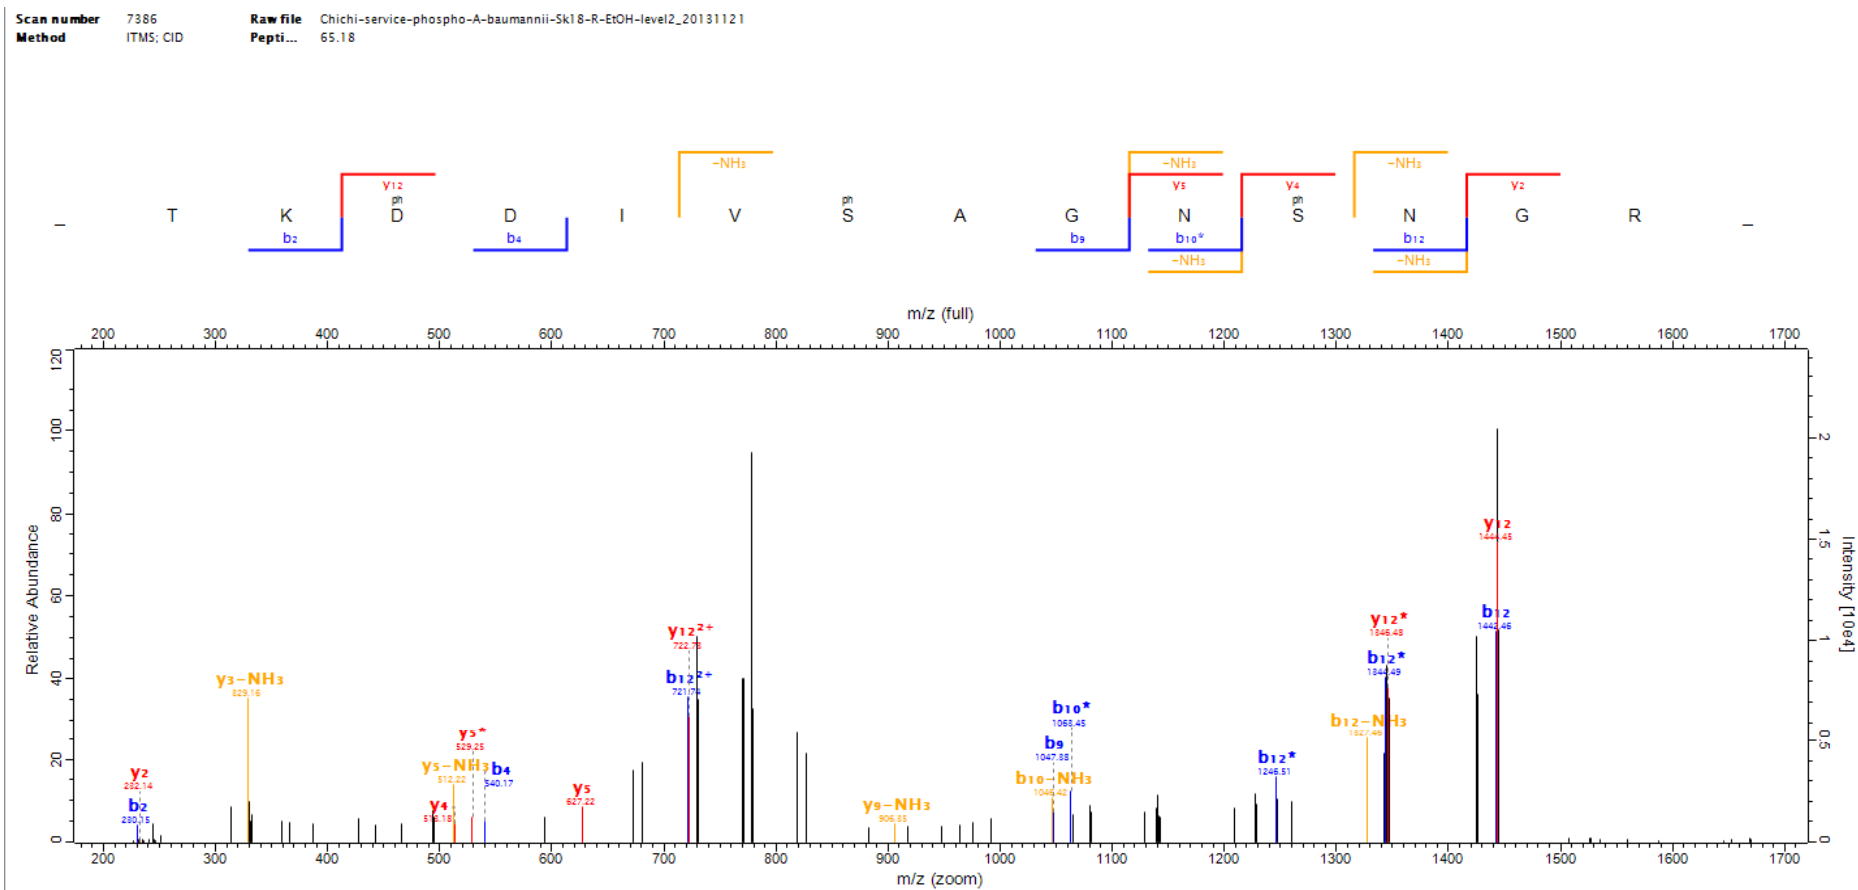

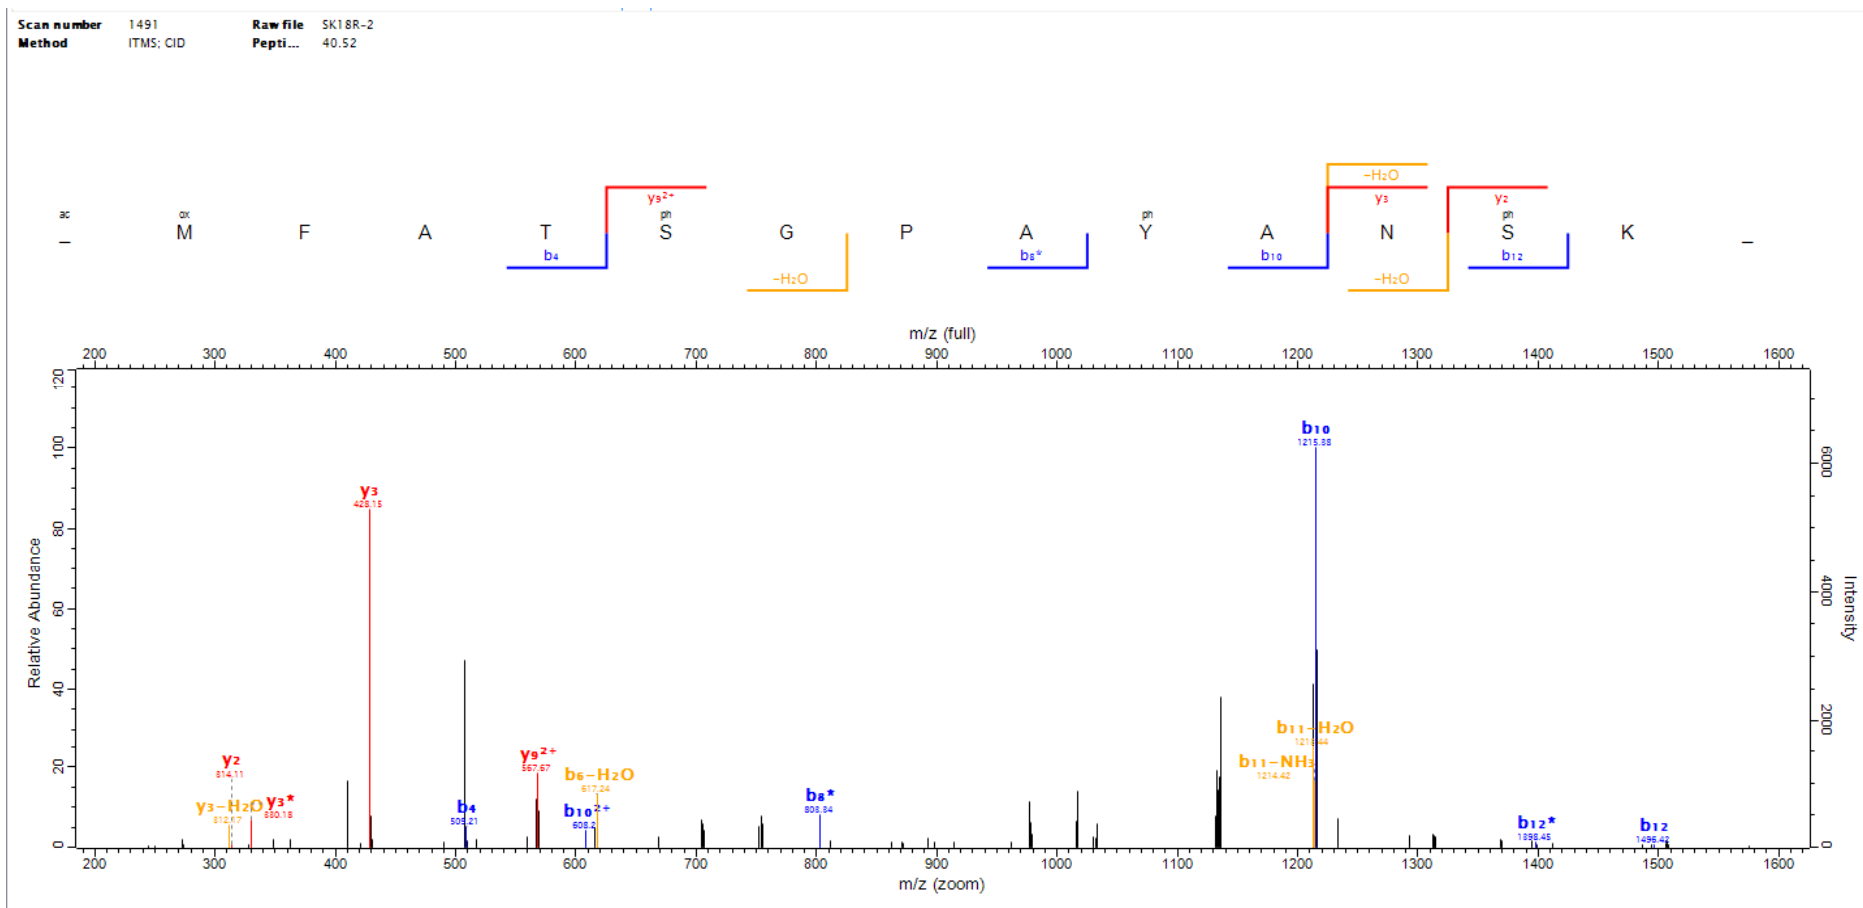

Scan number 14371 Raw file Chichi-service-phospho-A-baumannii-Sk18-R-PBS-level2\_20131121  
 Method ITMS: CID Pepti... 45

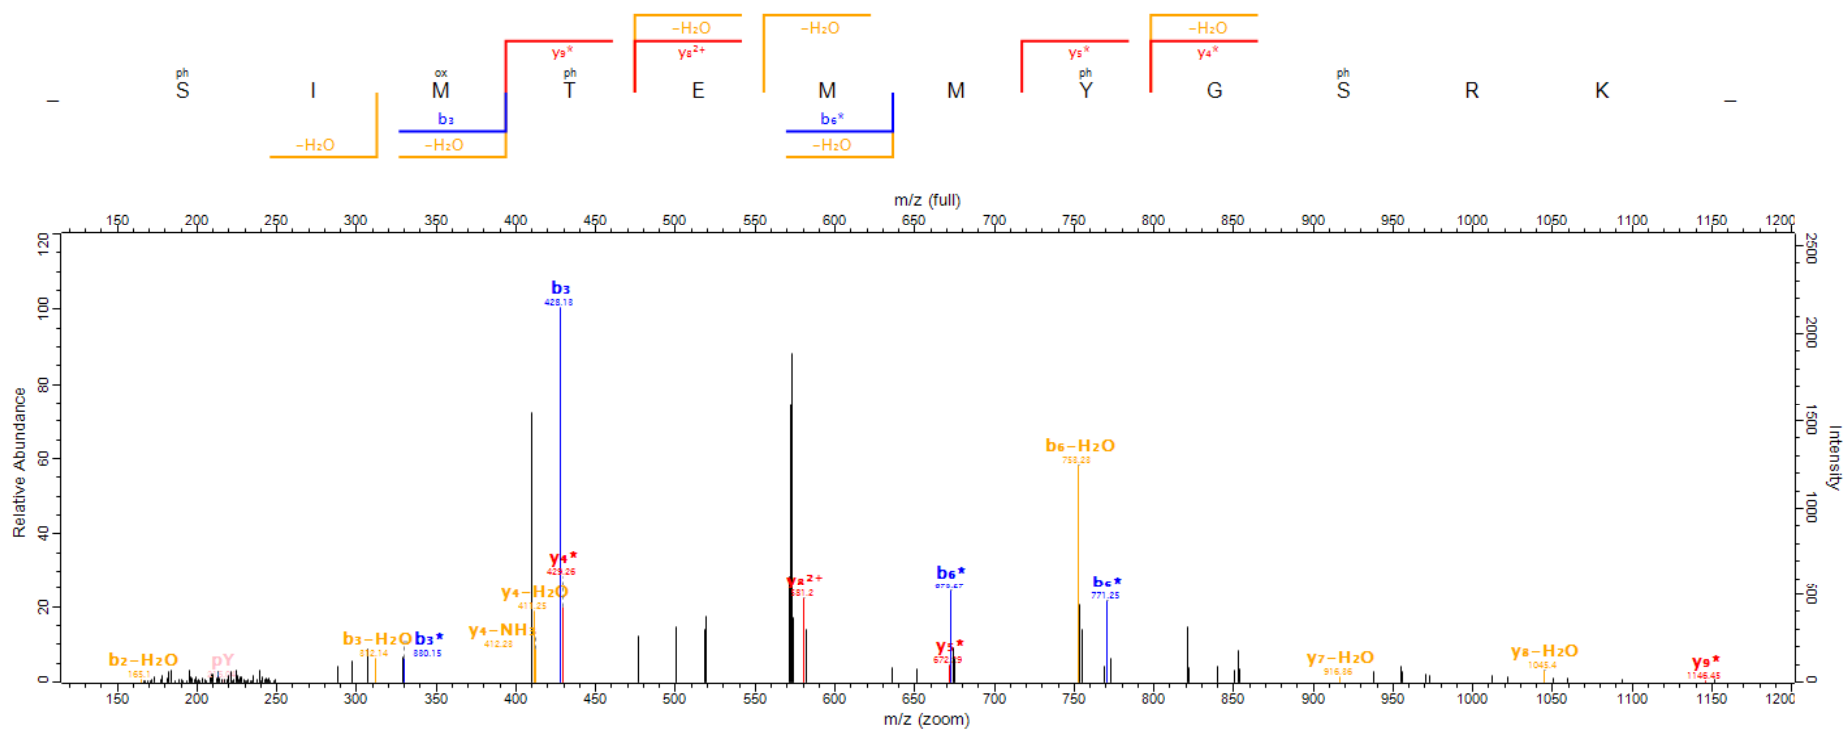

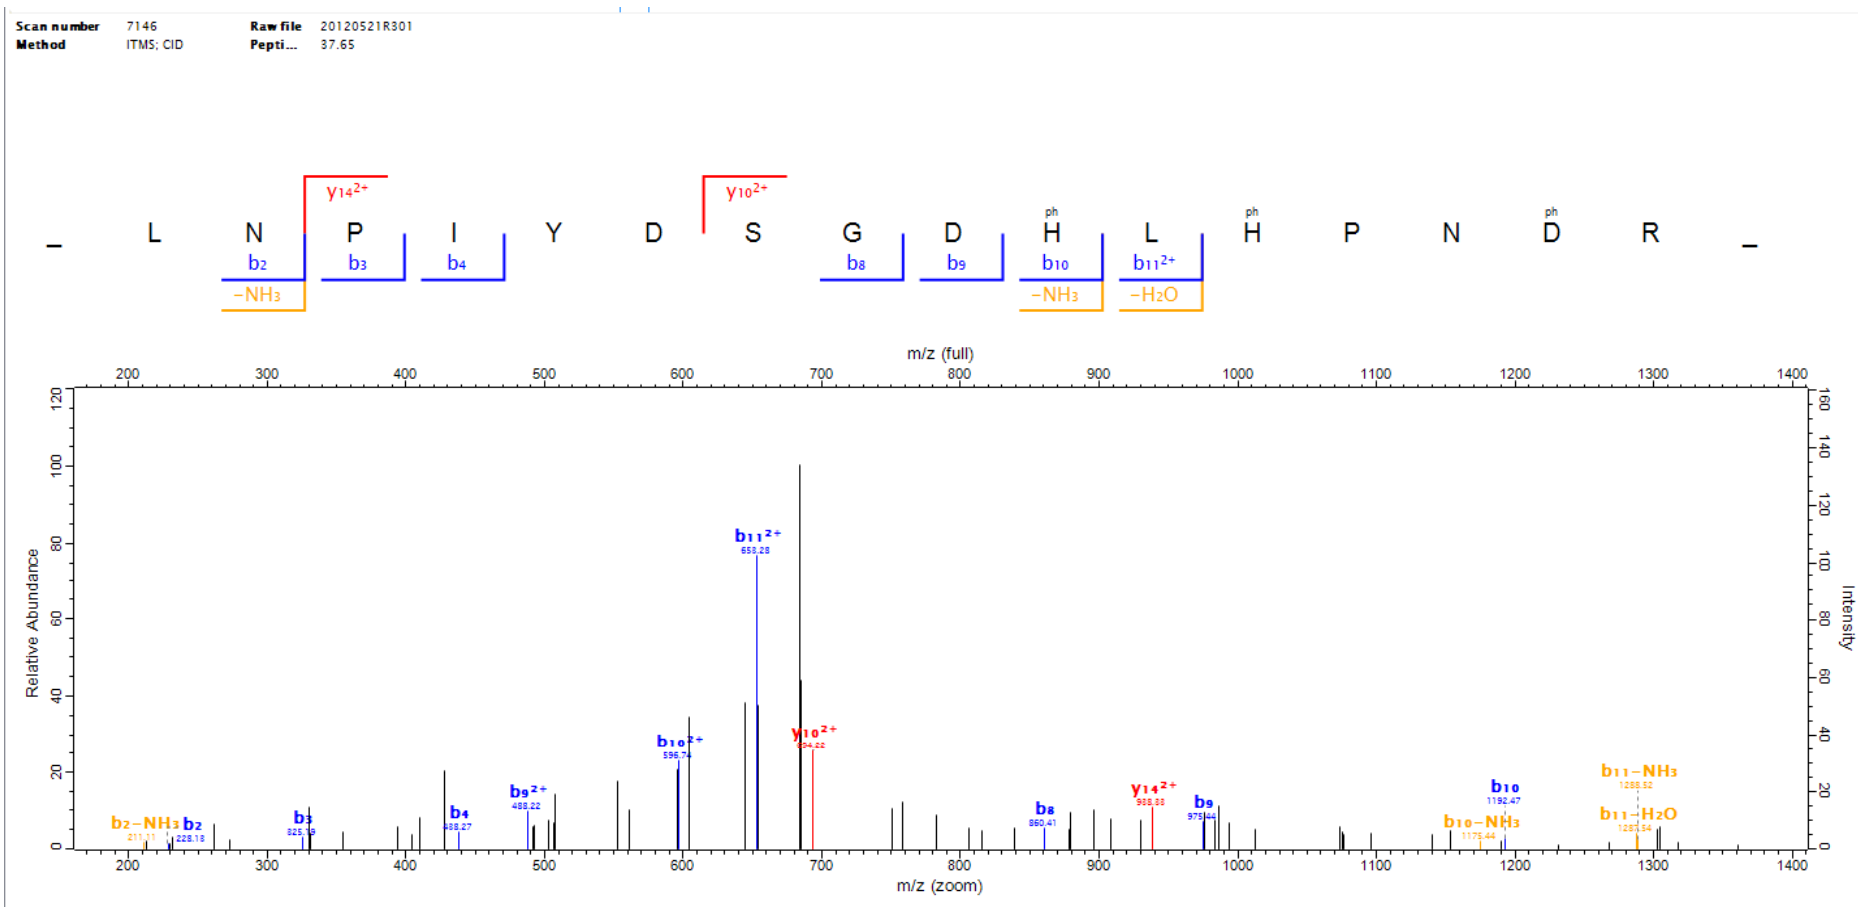

36-1

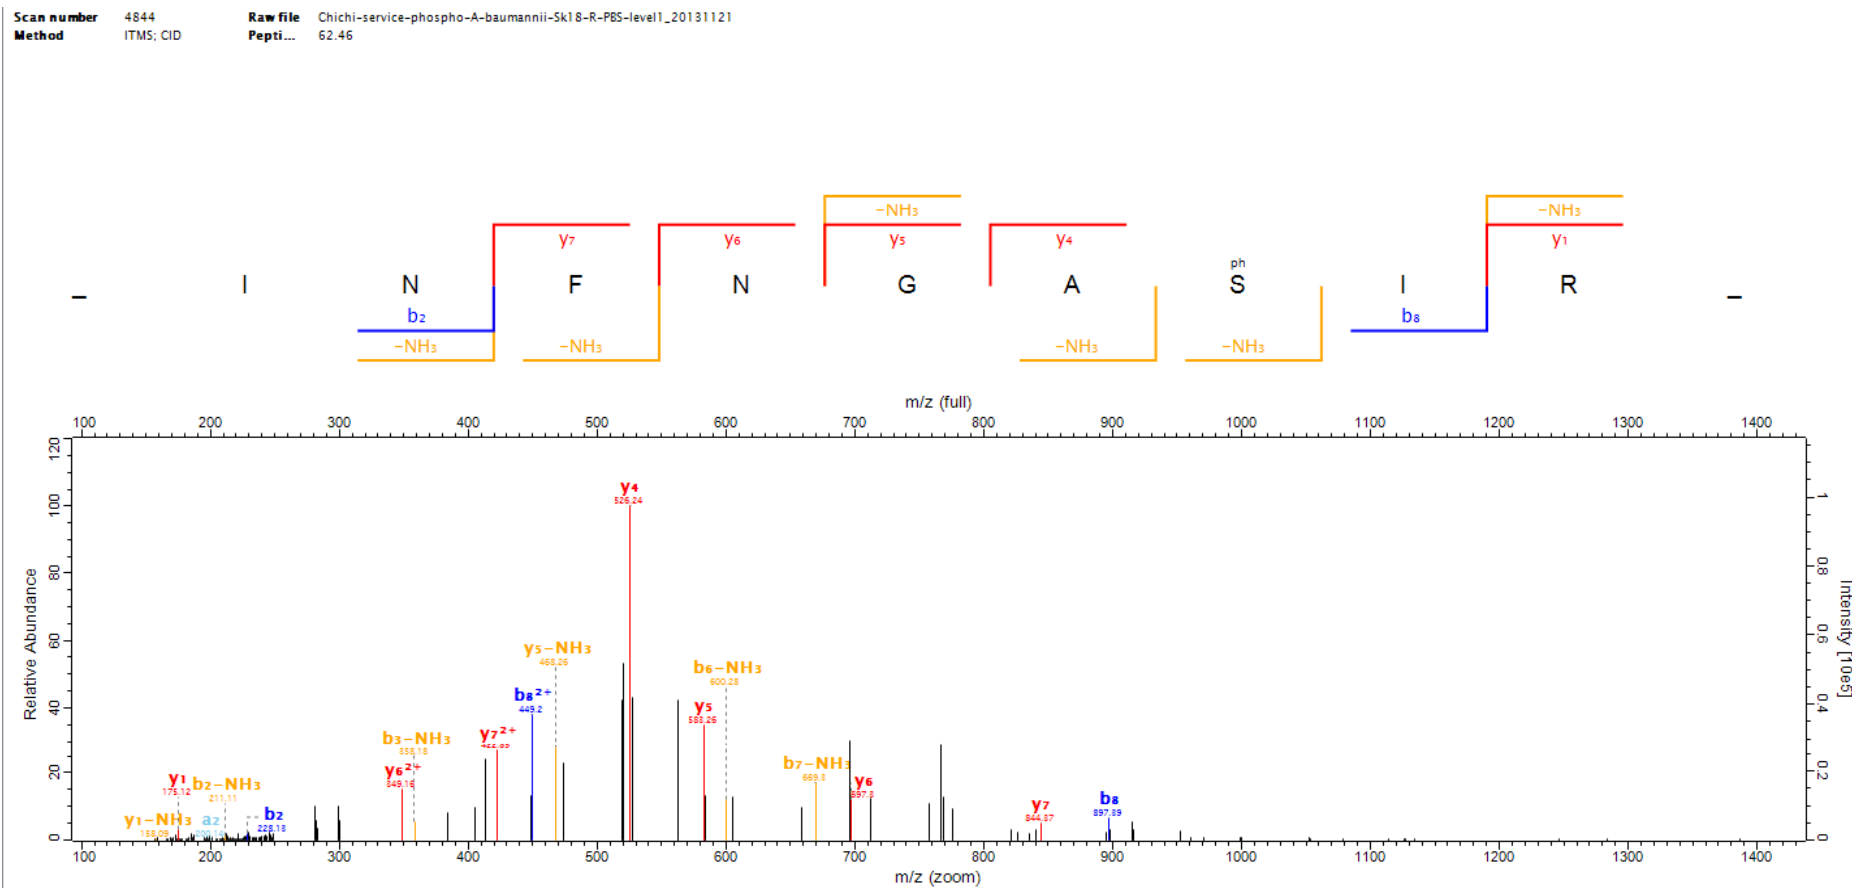



36-2

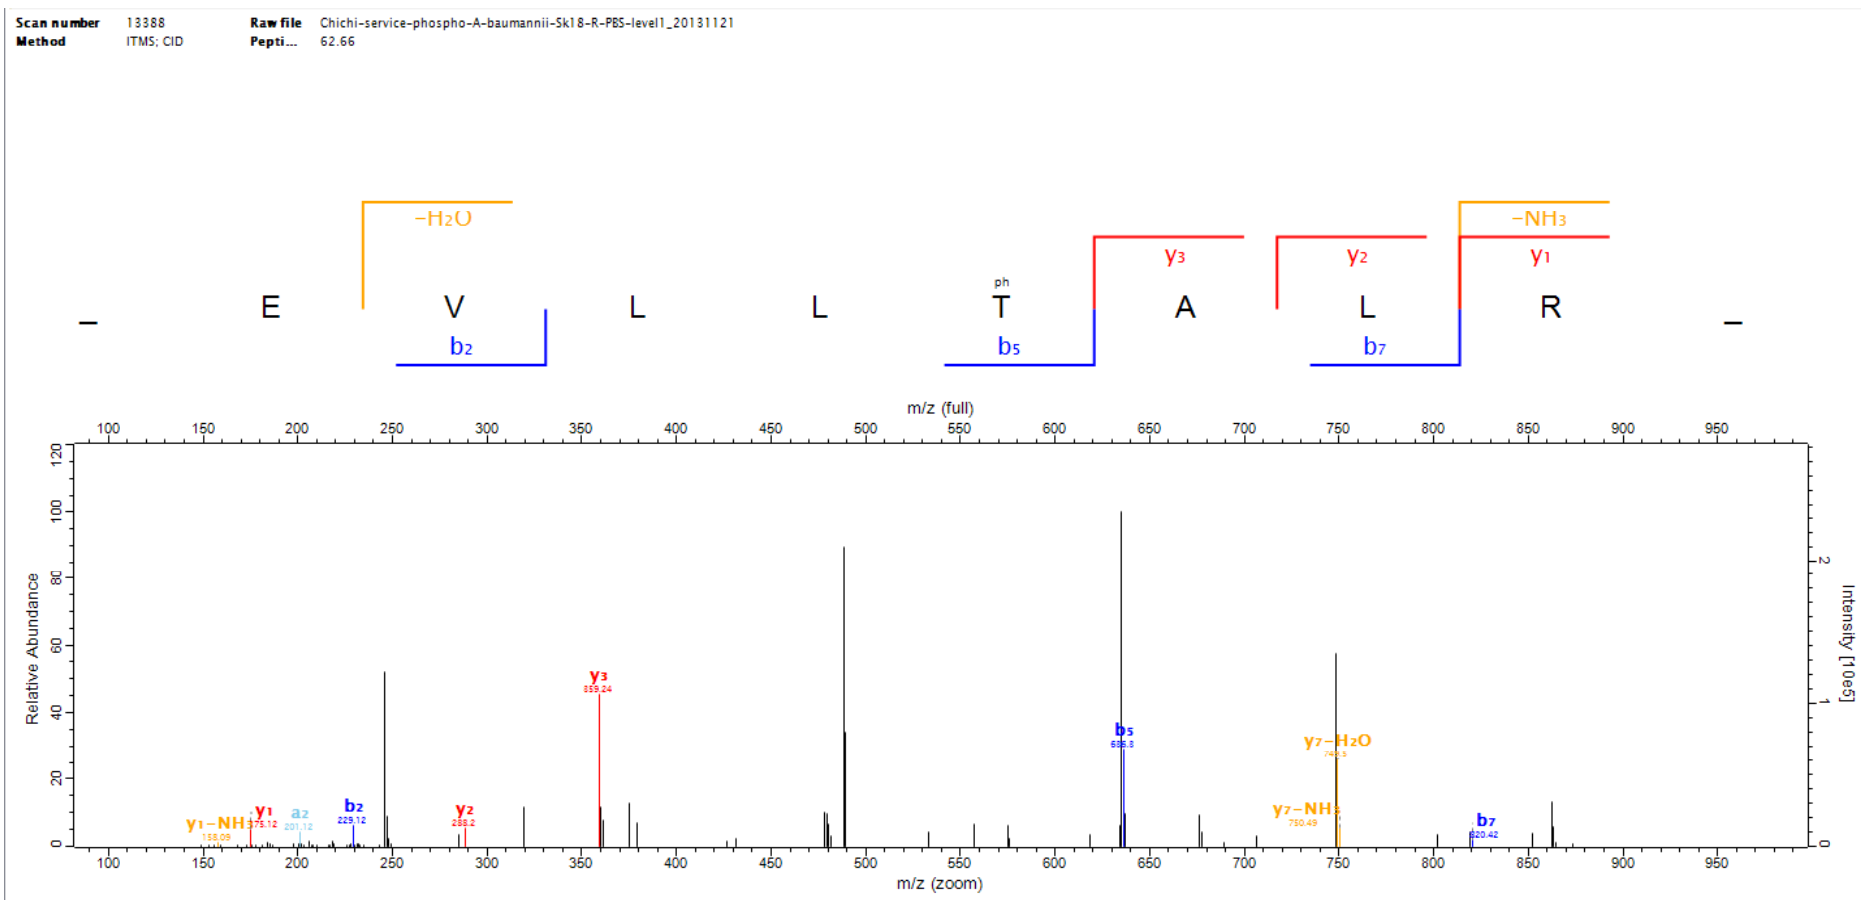

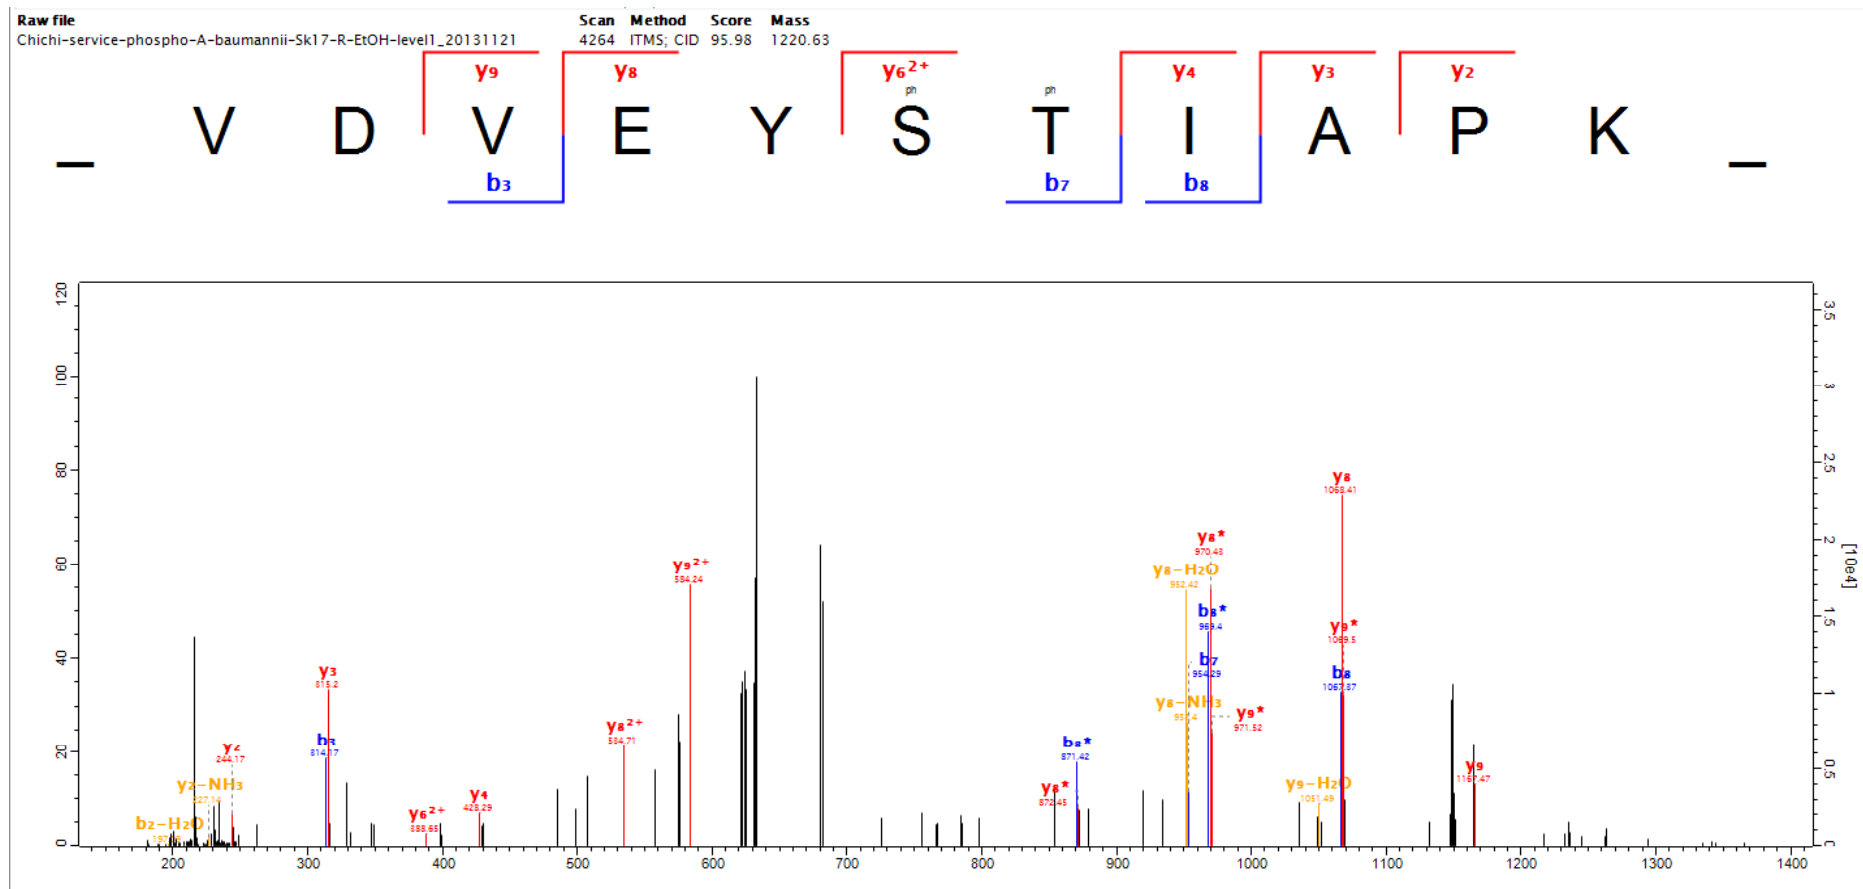

Scan number 6125 Raw file Chichi-service-phospho-A-baumannii-Sk1 8-R-PBS-level\_20131121  
 Method ITMS: CID Pepti... 53.09

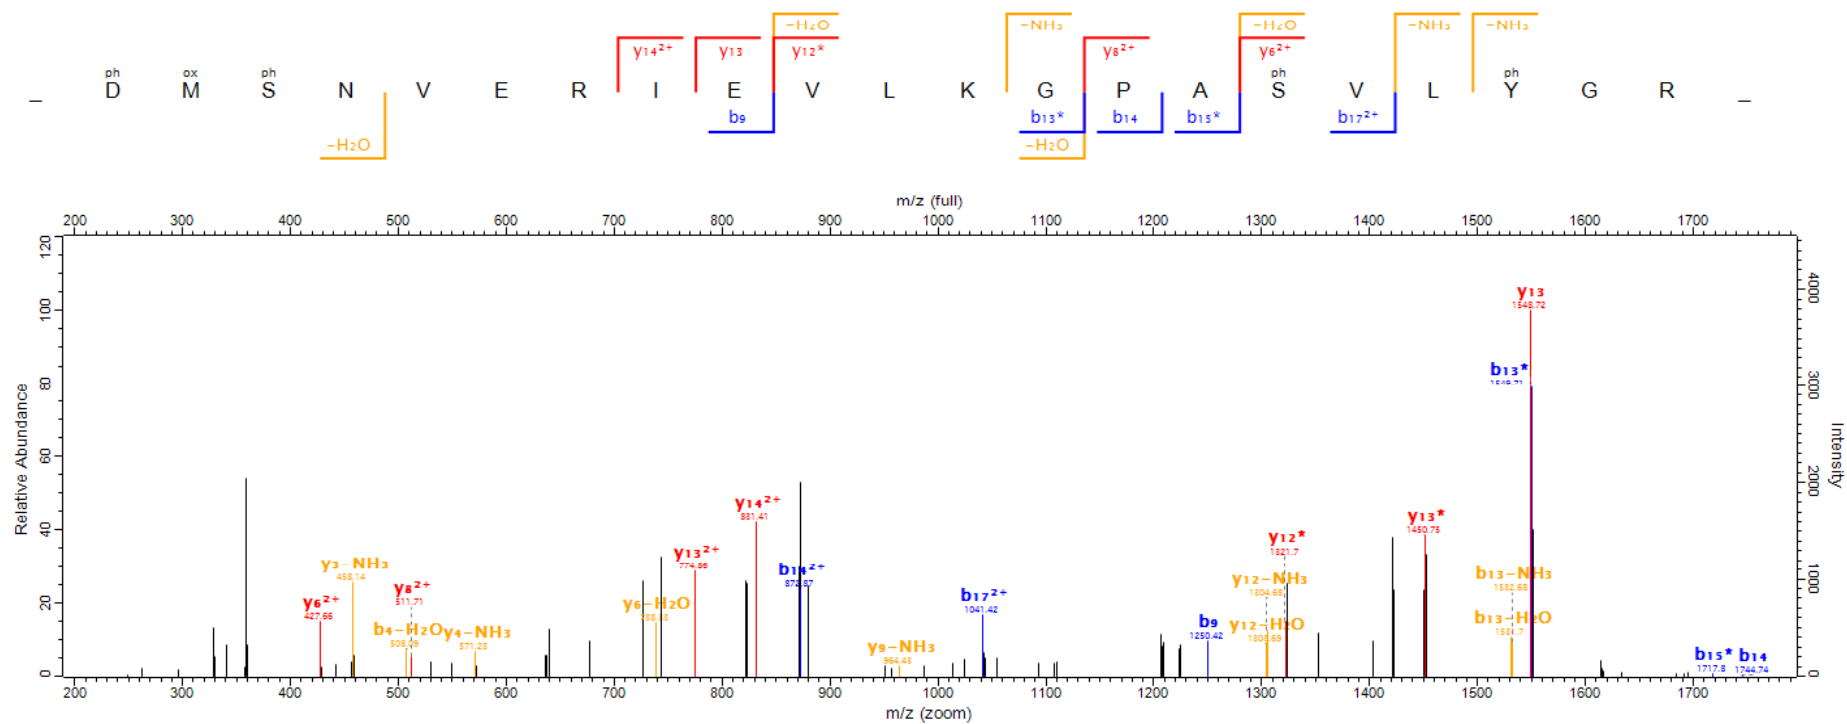

39-1

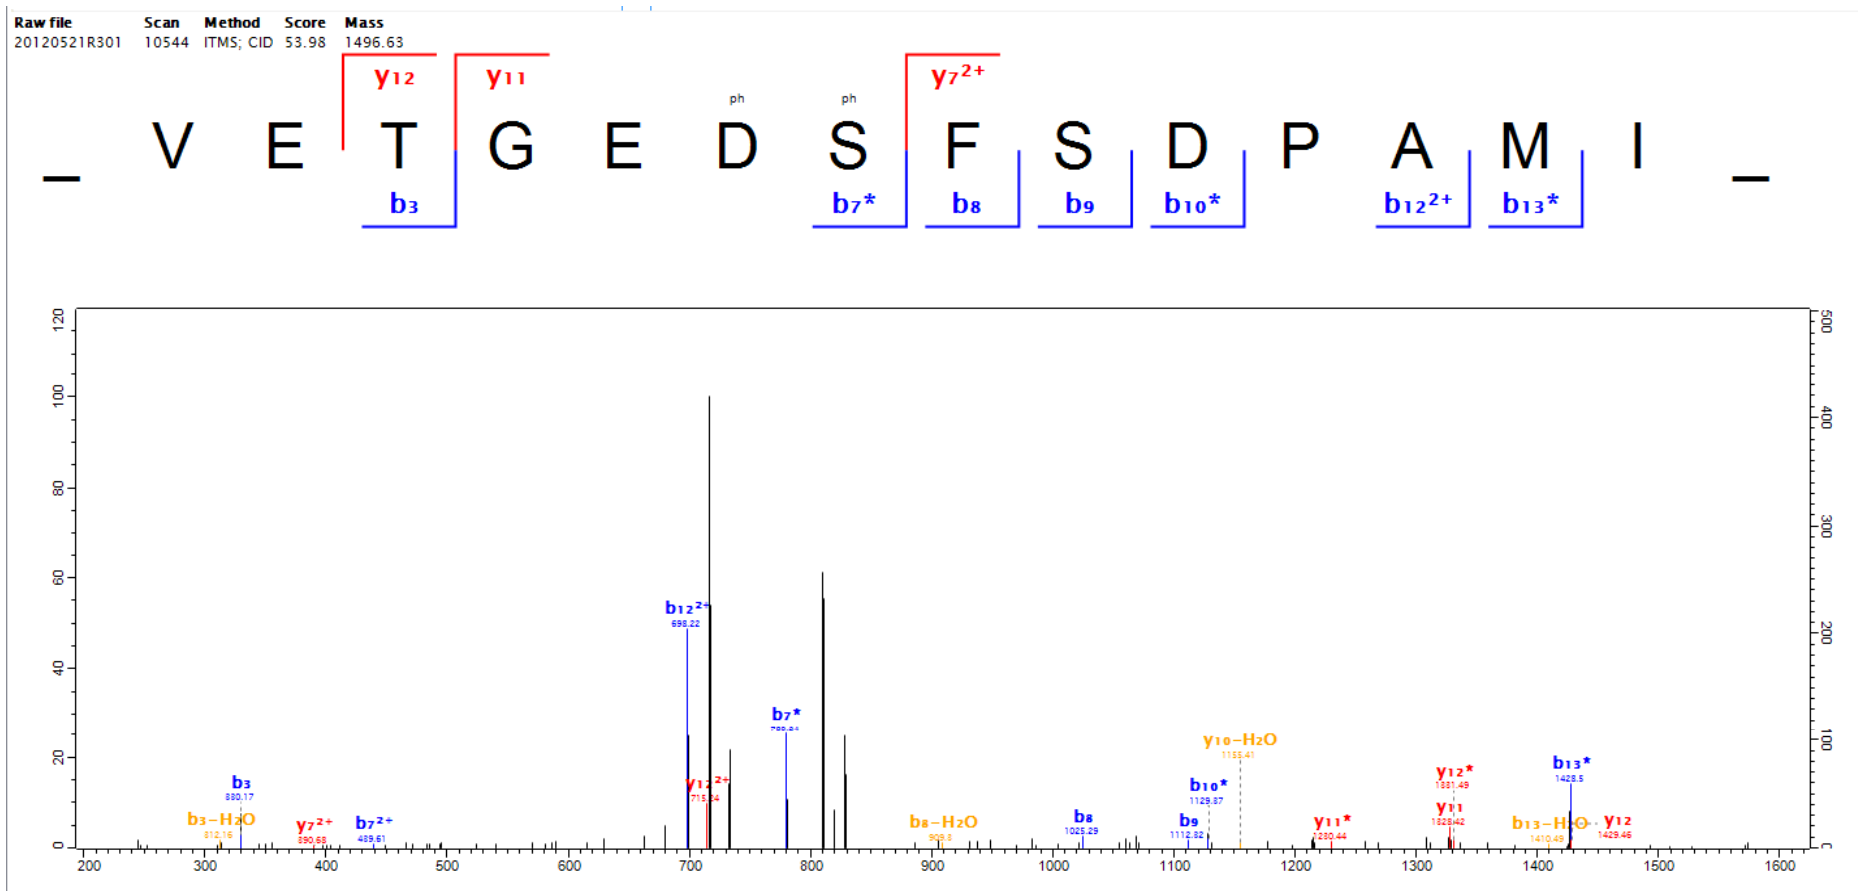

39-2

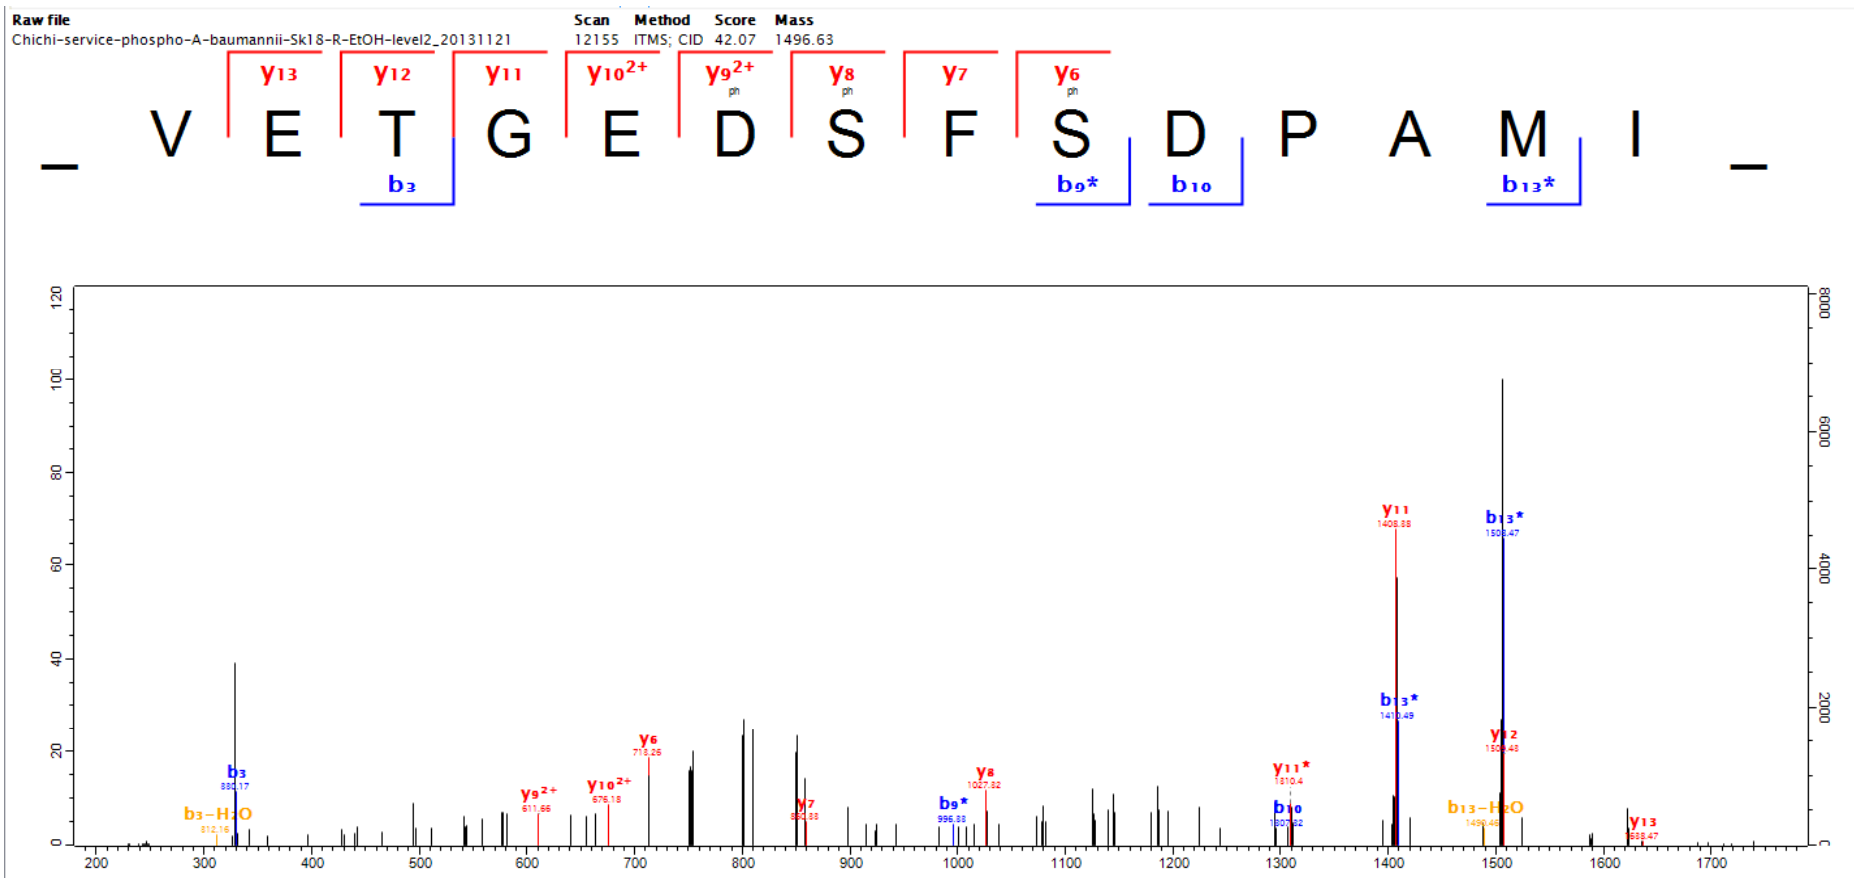

39-3

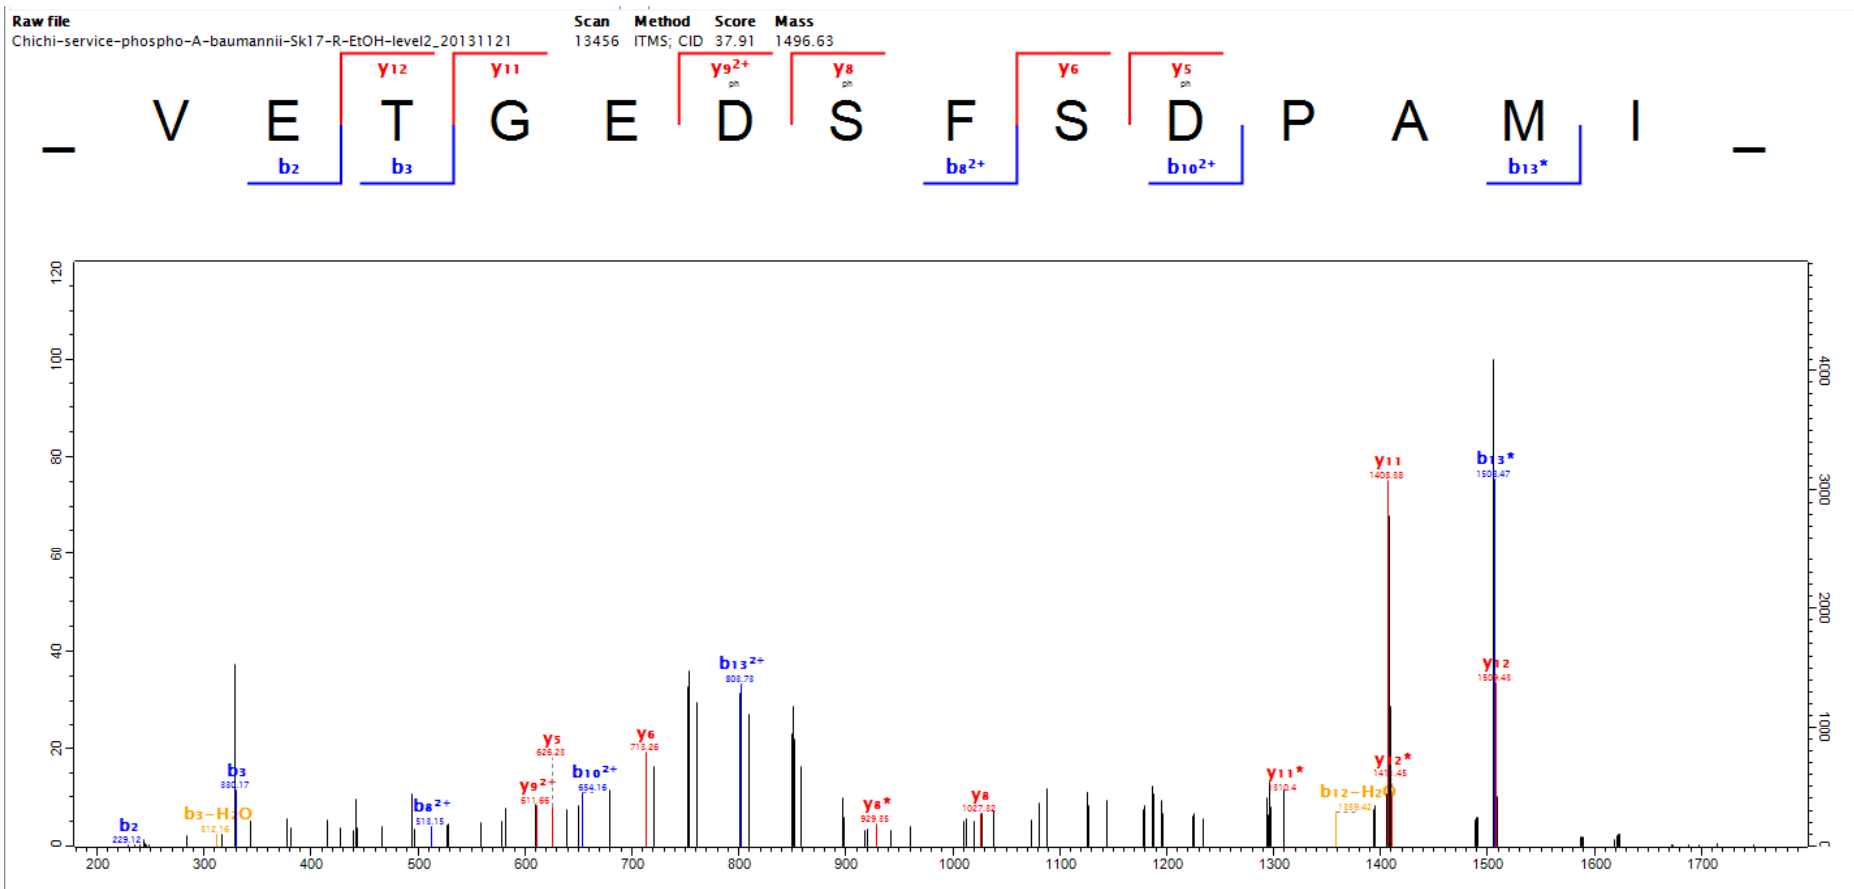

Scan number 4839 Raw file Chichi-service-phospho-A-baumannii-Sk17-R-PBS-level2\_20131121  
 Method ITMS: CID Pepti... 74.15

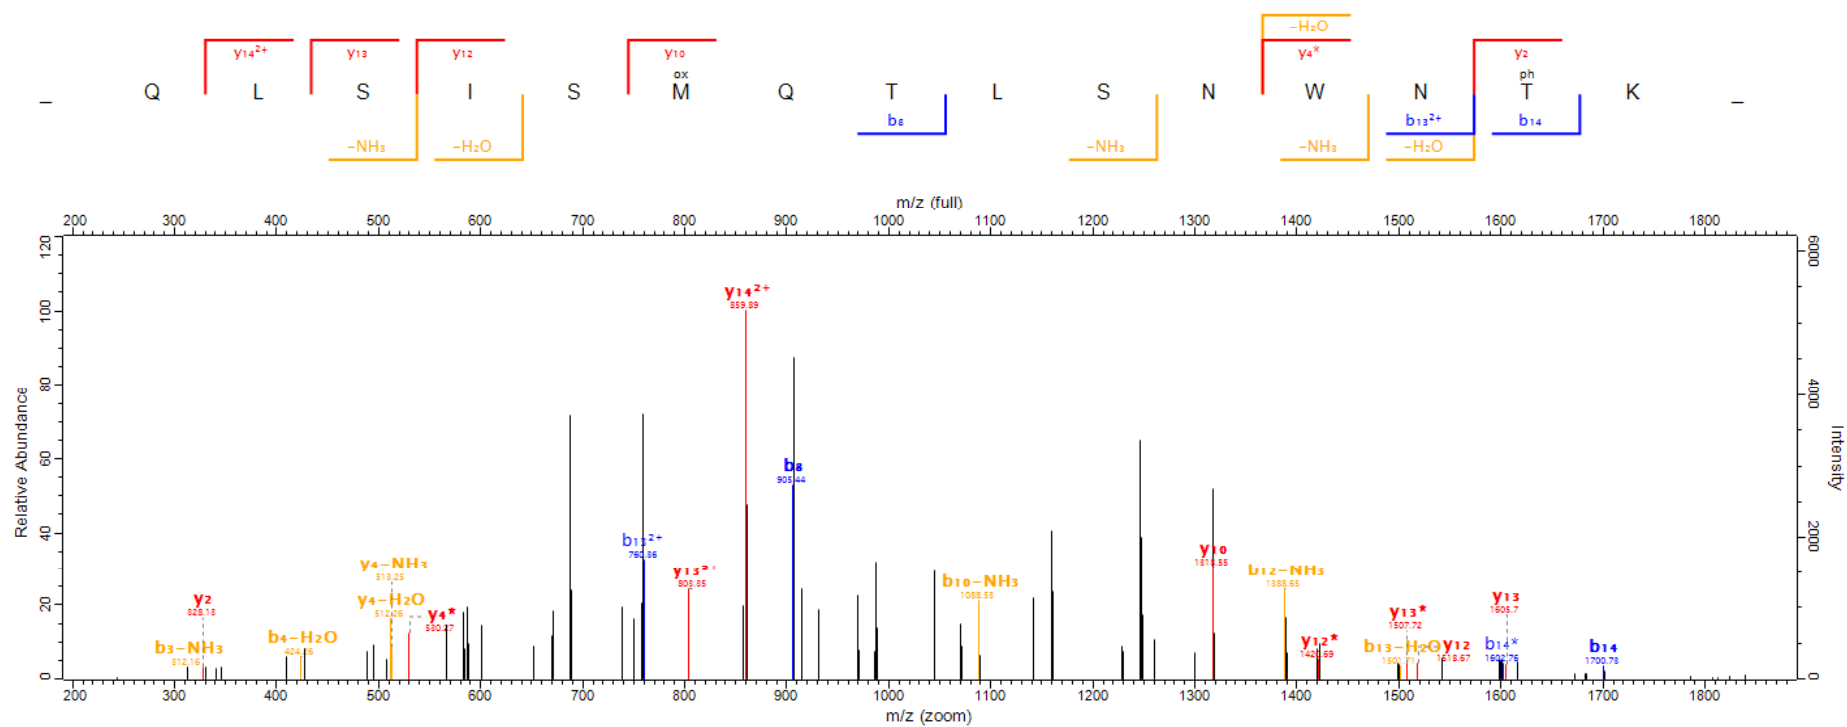

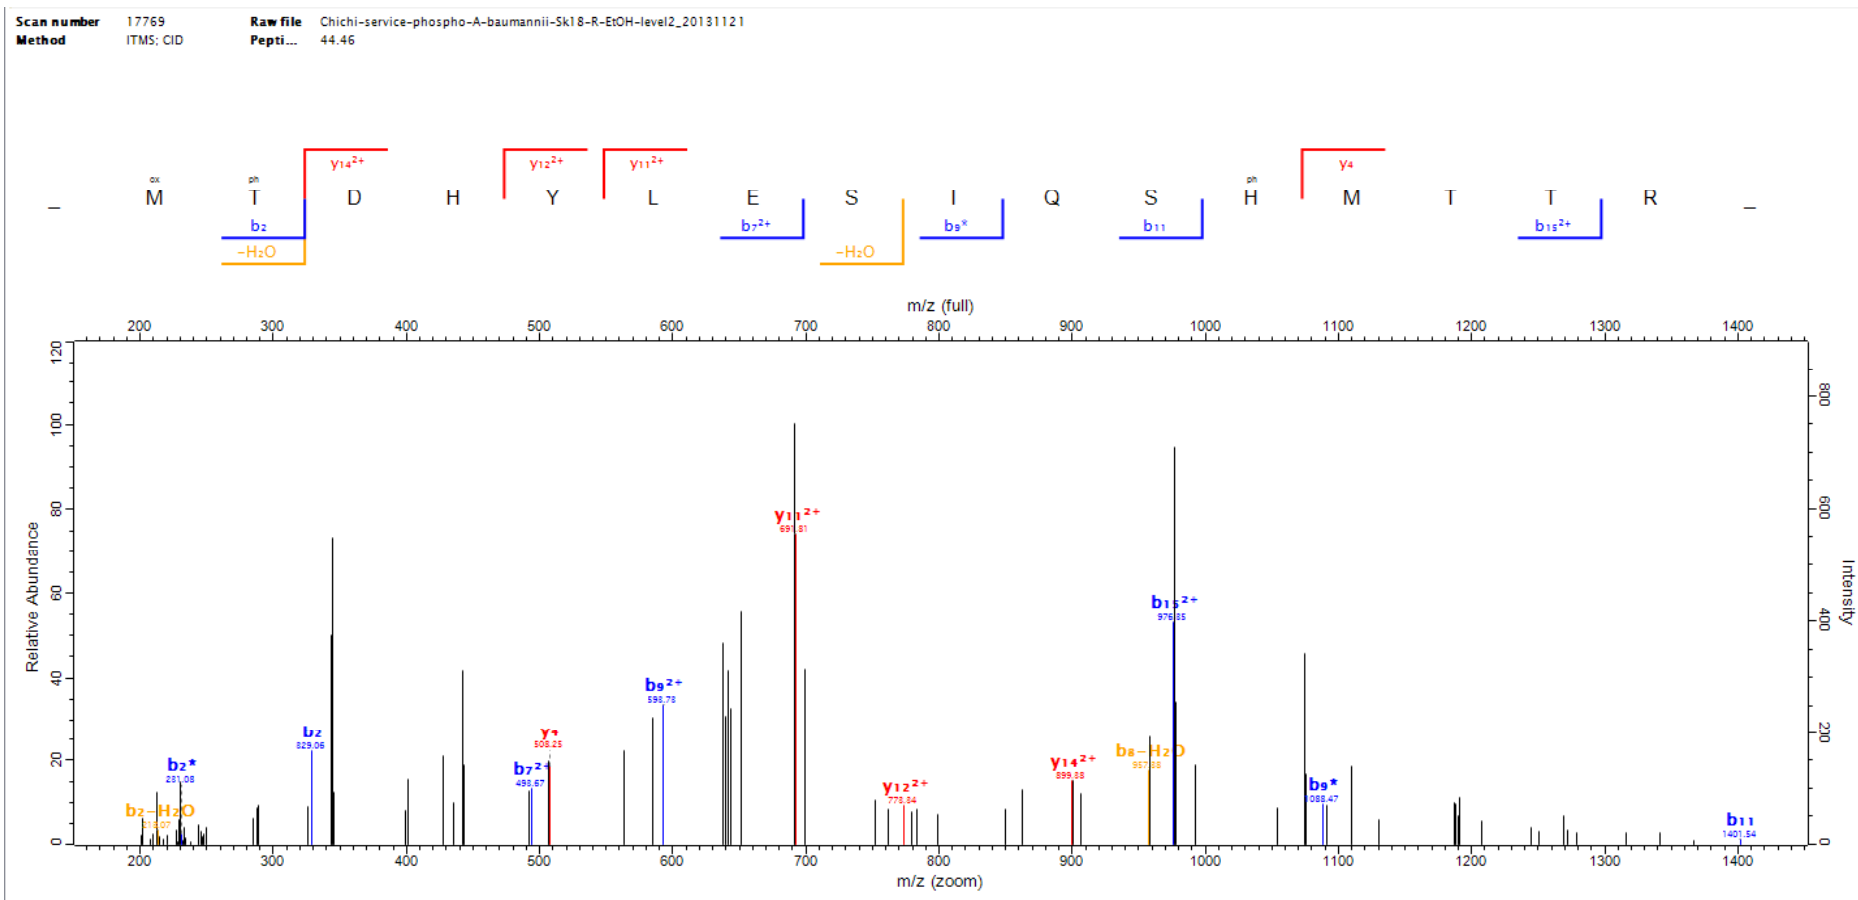



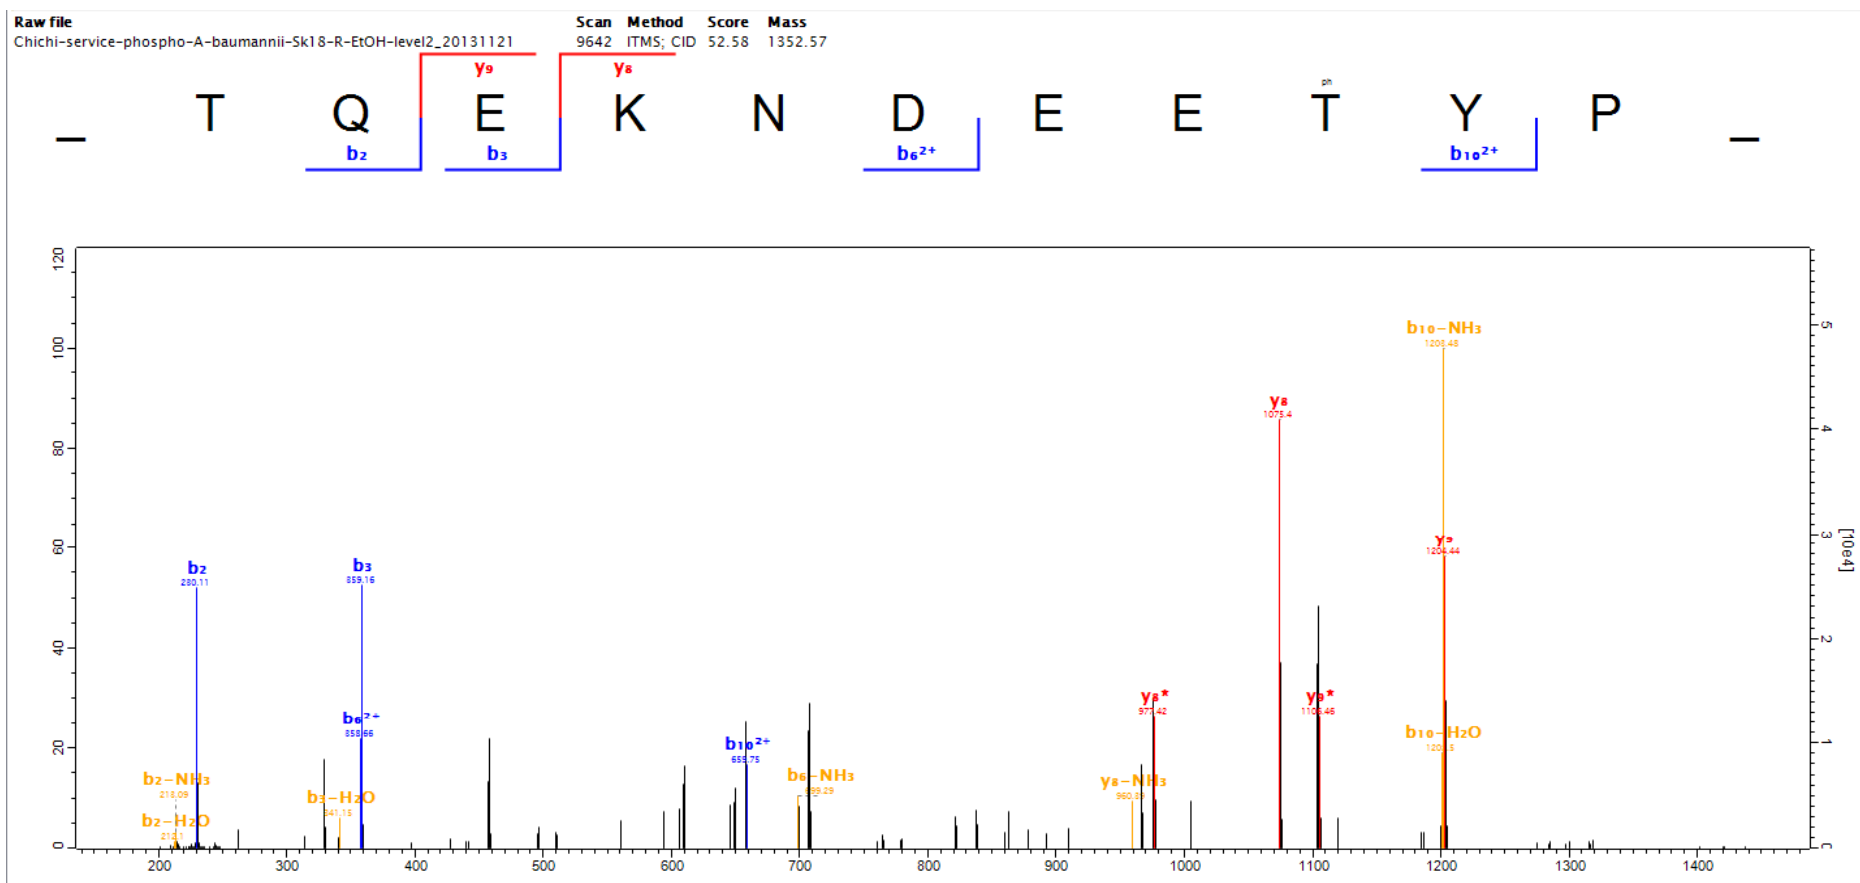

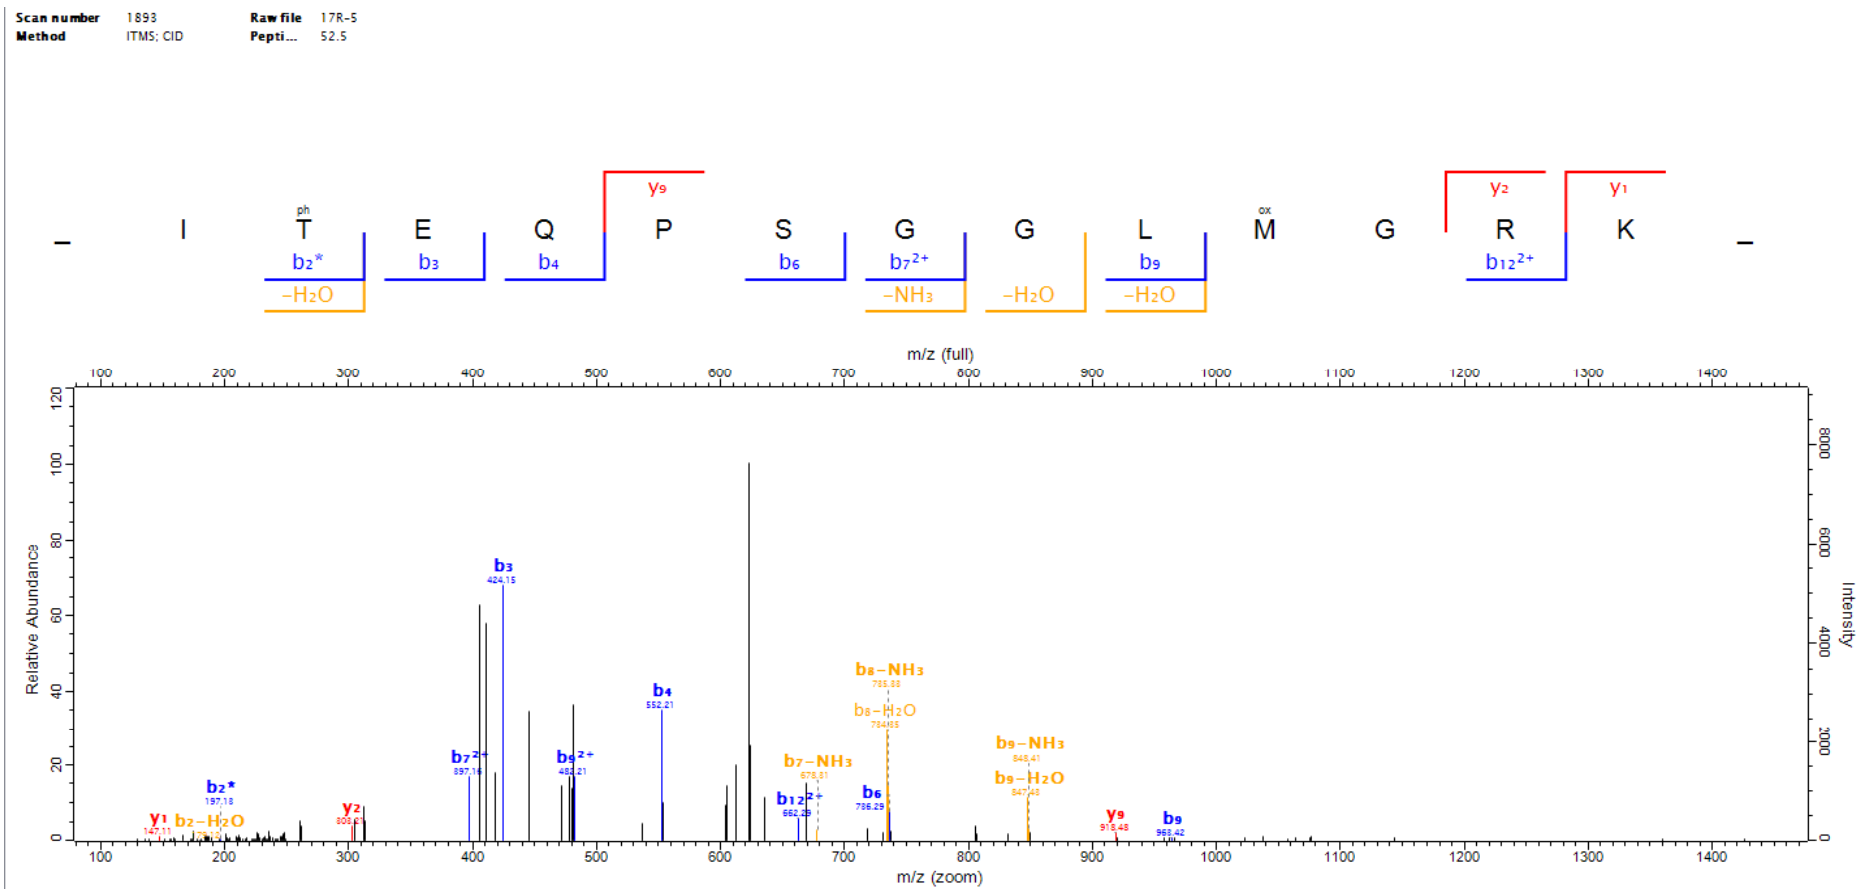

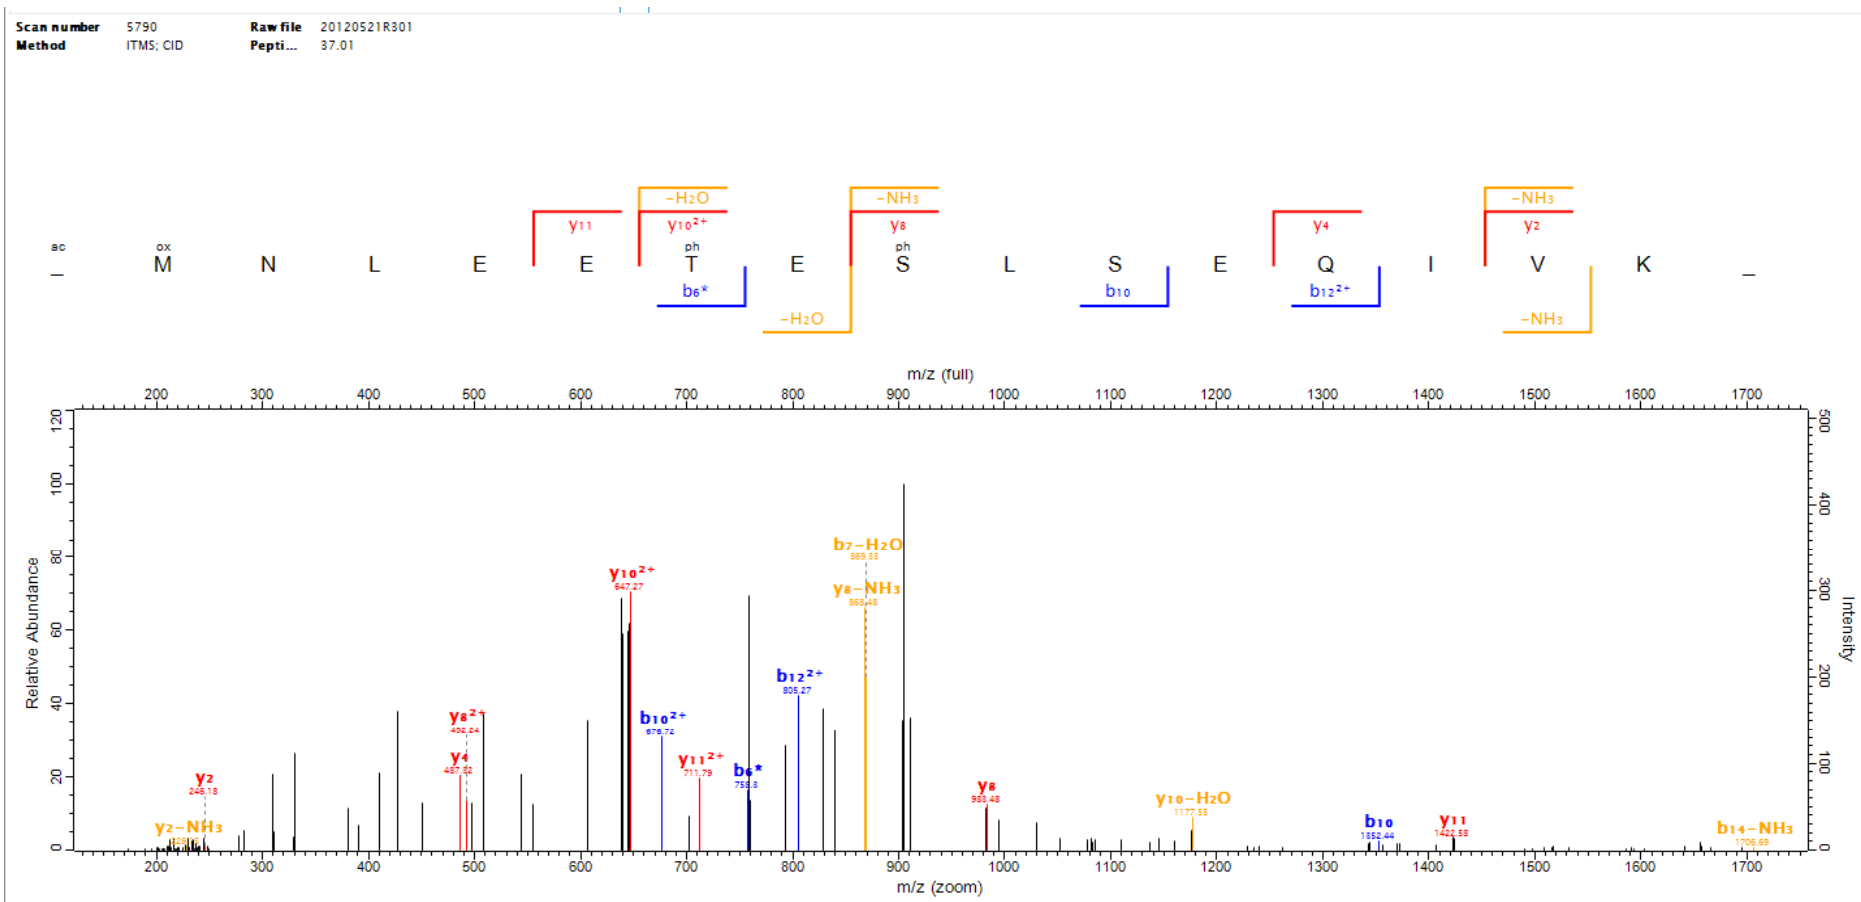

Raw file Scan Method Score Mass  
SK17R-3 1626 ITMS; CID 53.38 1247.6

— N E A D <sup>ph</sup>A <sup>y8</sup>L <sup>y6<sup>2+</sup></sup>I <sup>ph</sup>S <sup>ph</sup>S <sup>y3<sup>ph</sup></sup>S <sup>y2</sup>N K —  
<sub>b6<sup>2+</sup></sub> <sub>b9</sub>

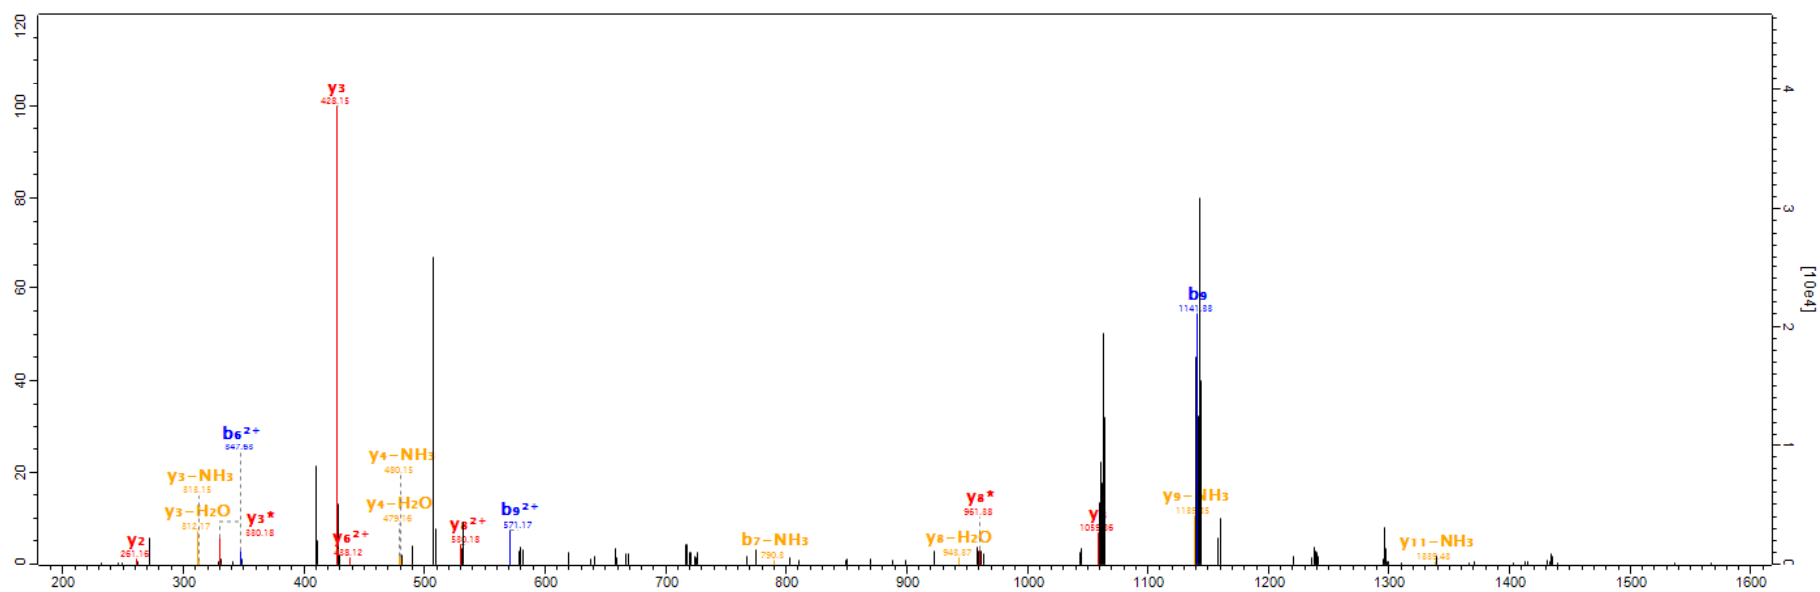

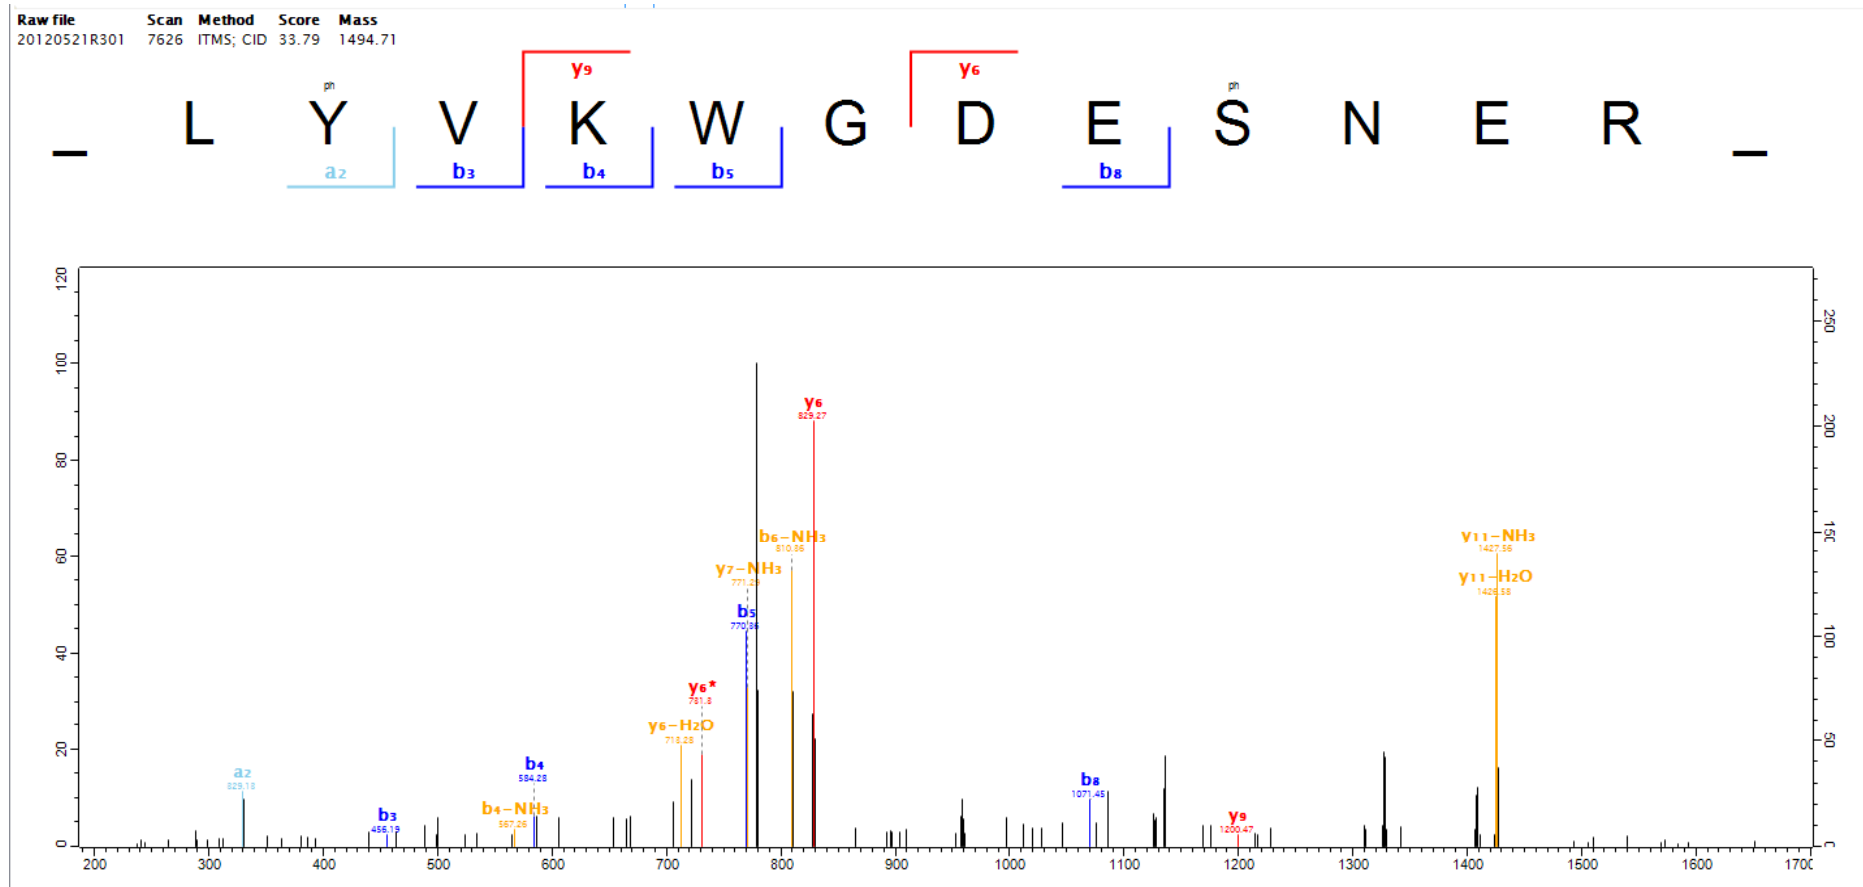

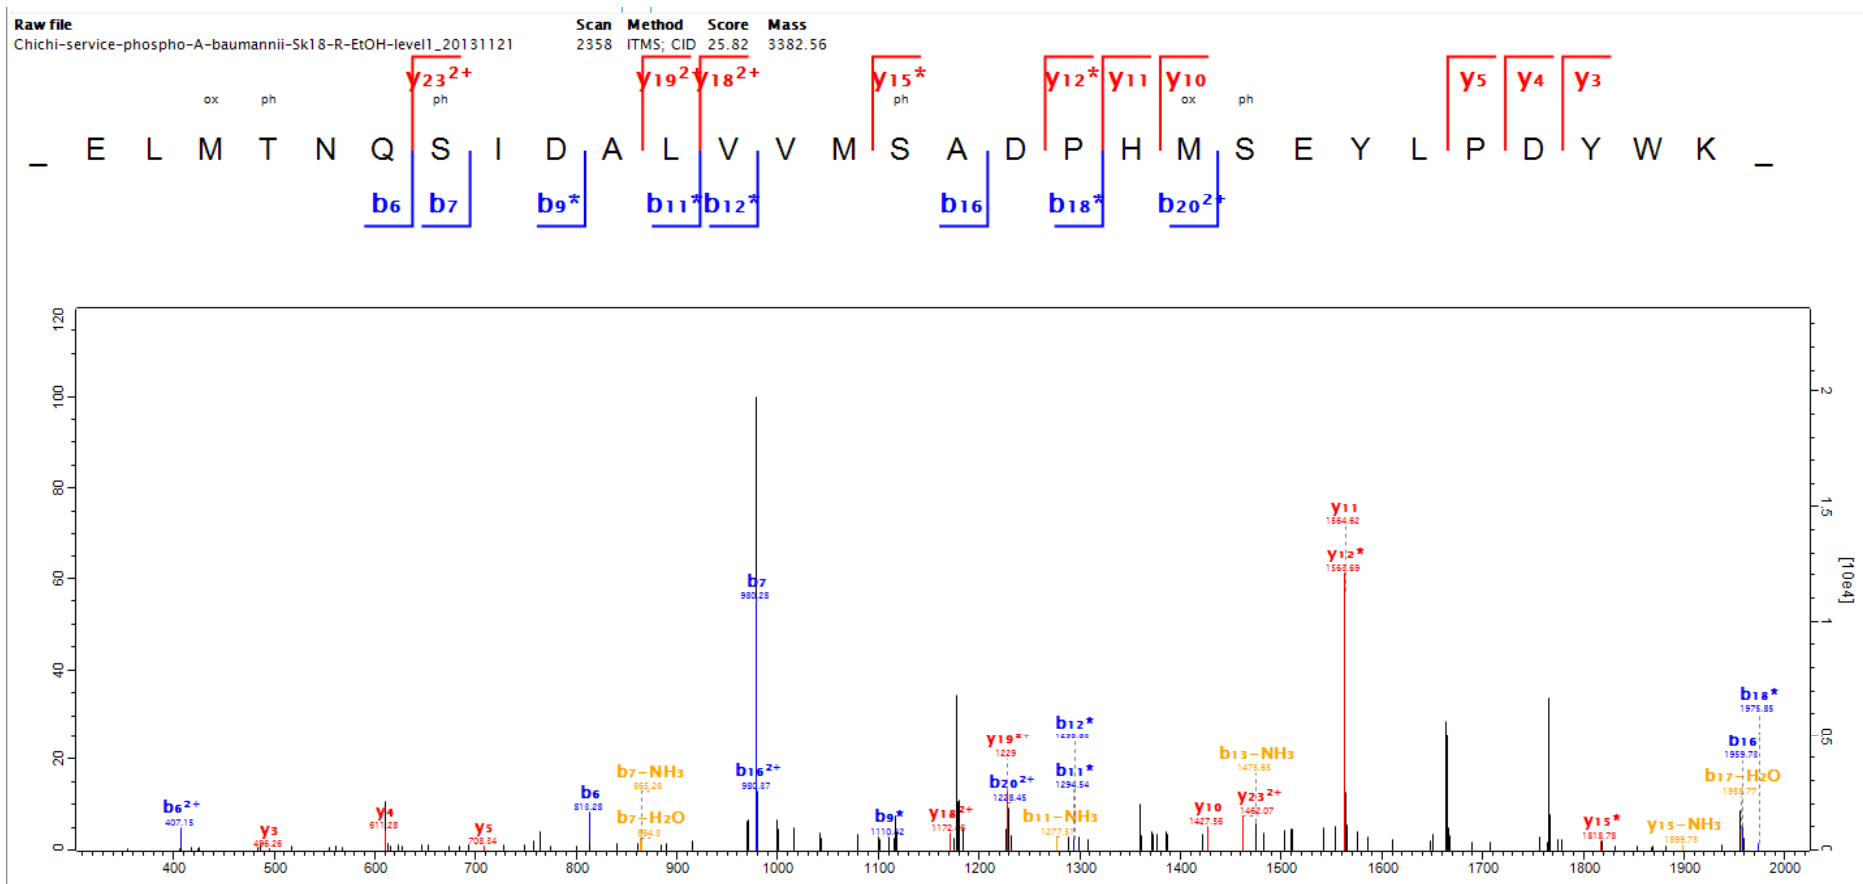

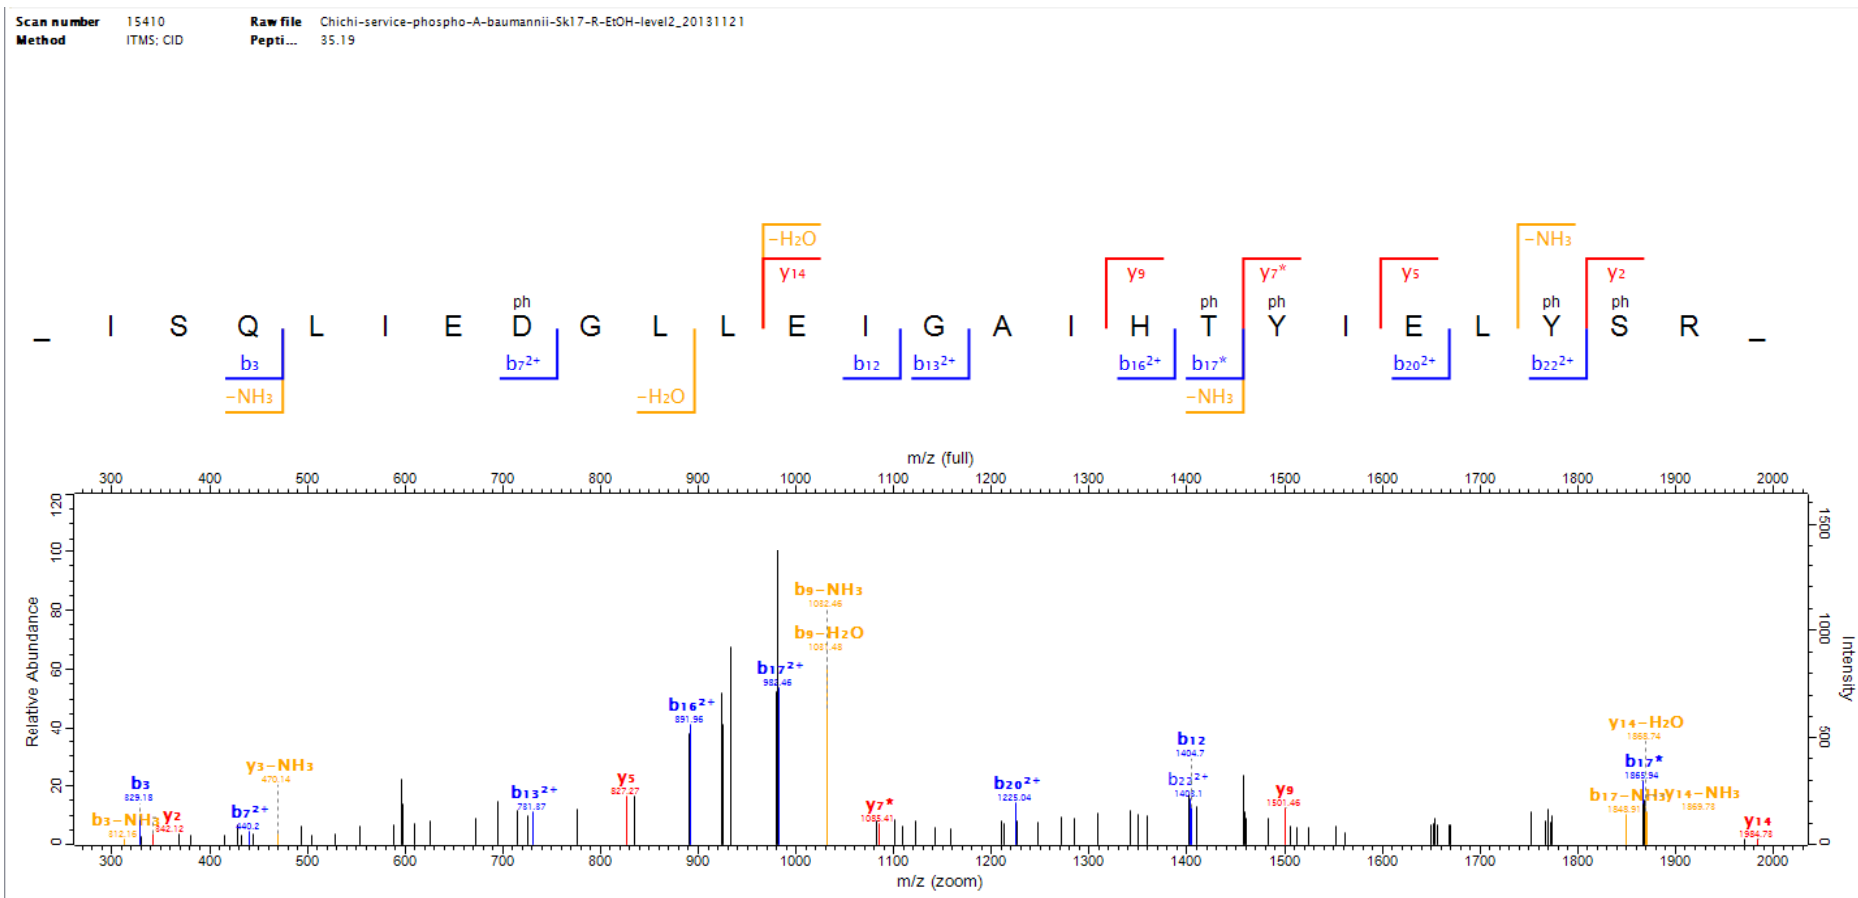

Scan number 6259 Raw file SK18-R-2  
 Method ITMS: CID Pepti... 31.17

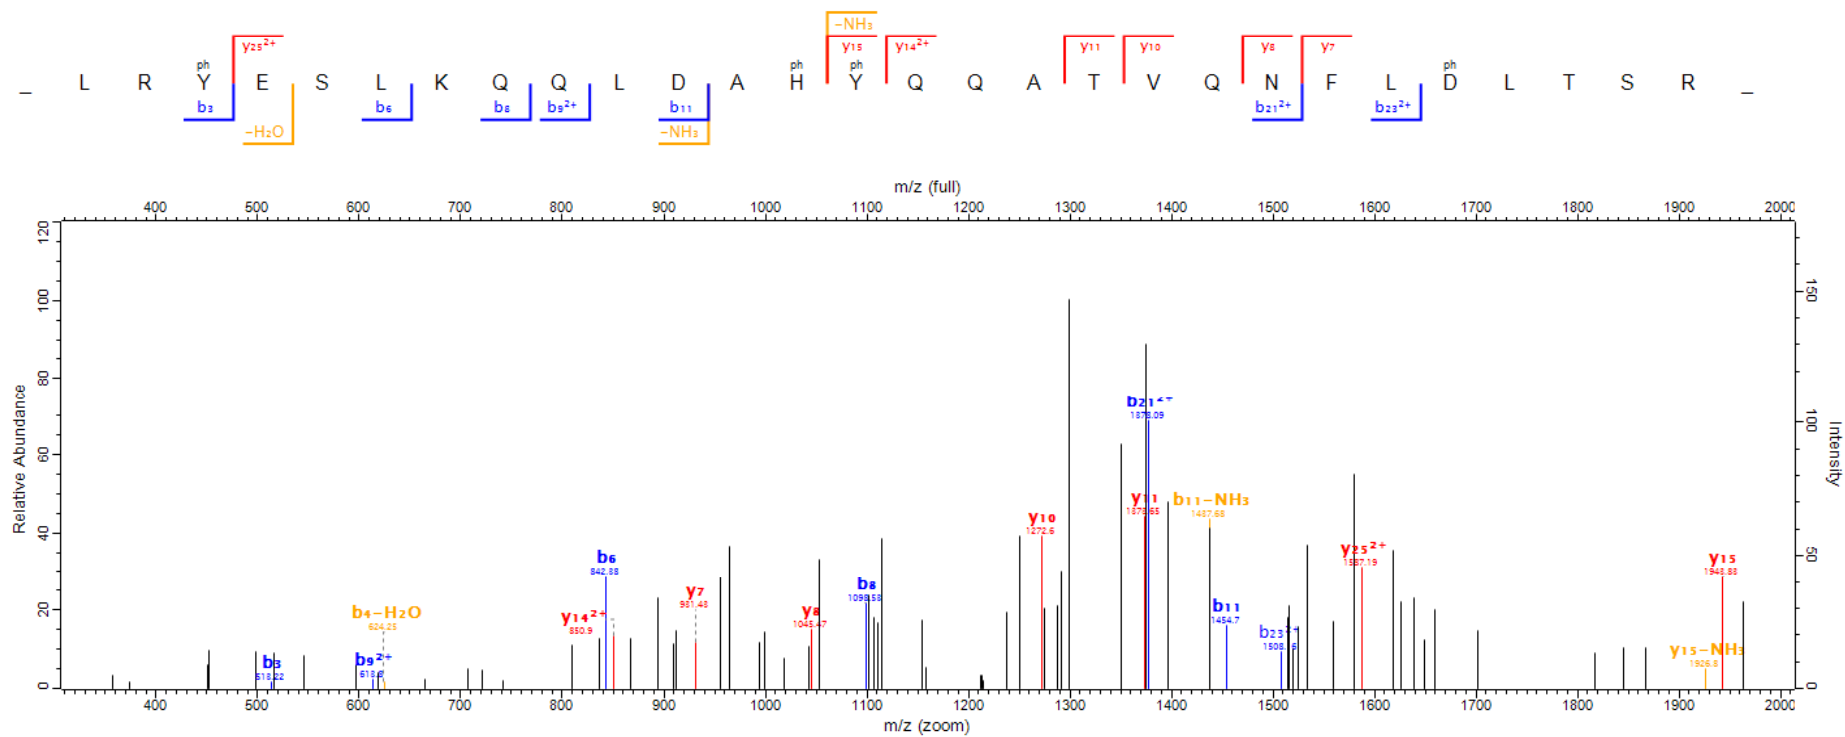



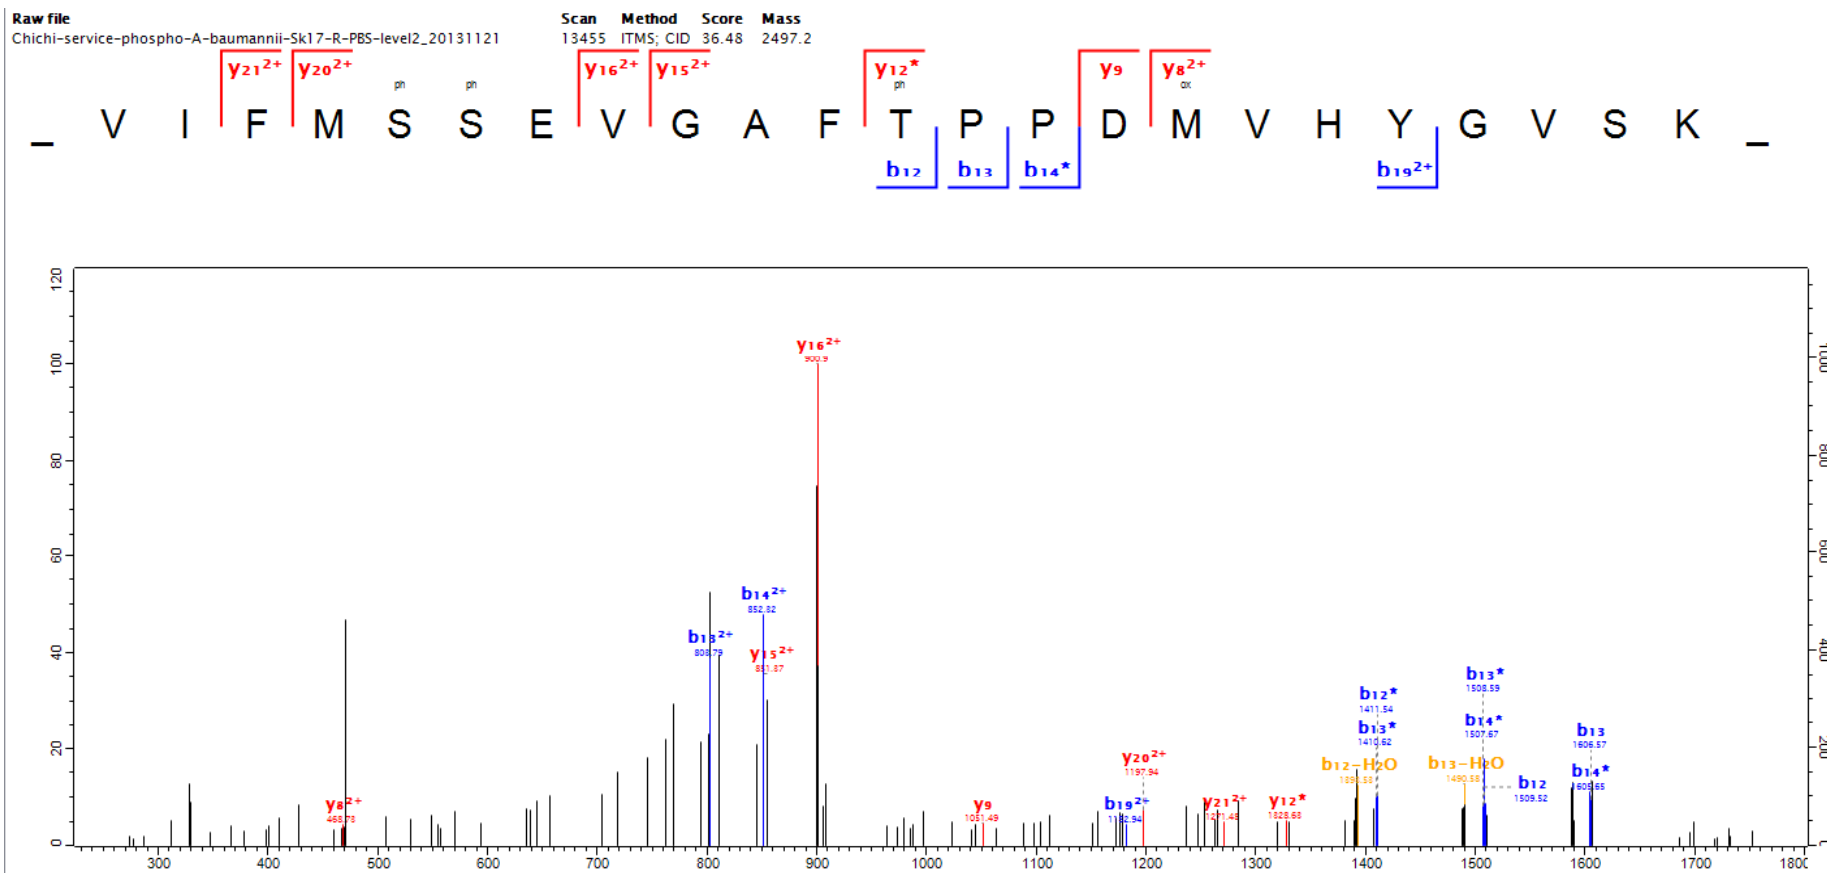

51-1

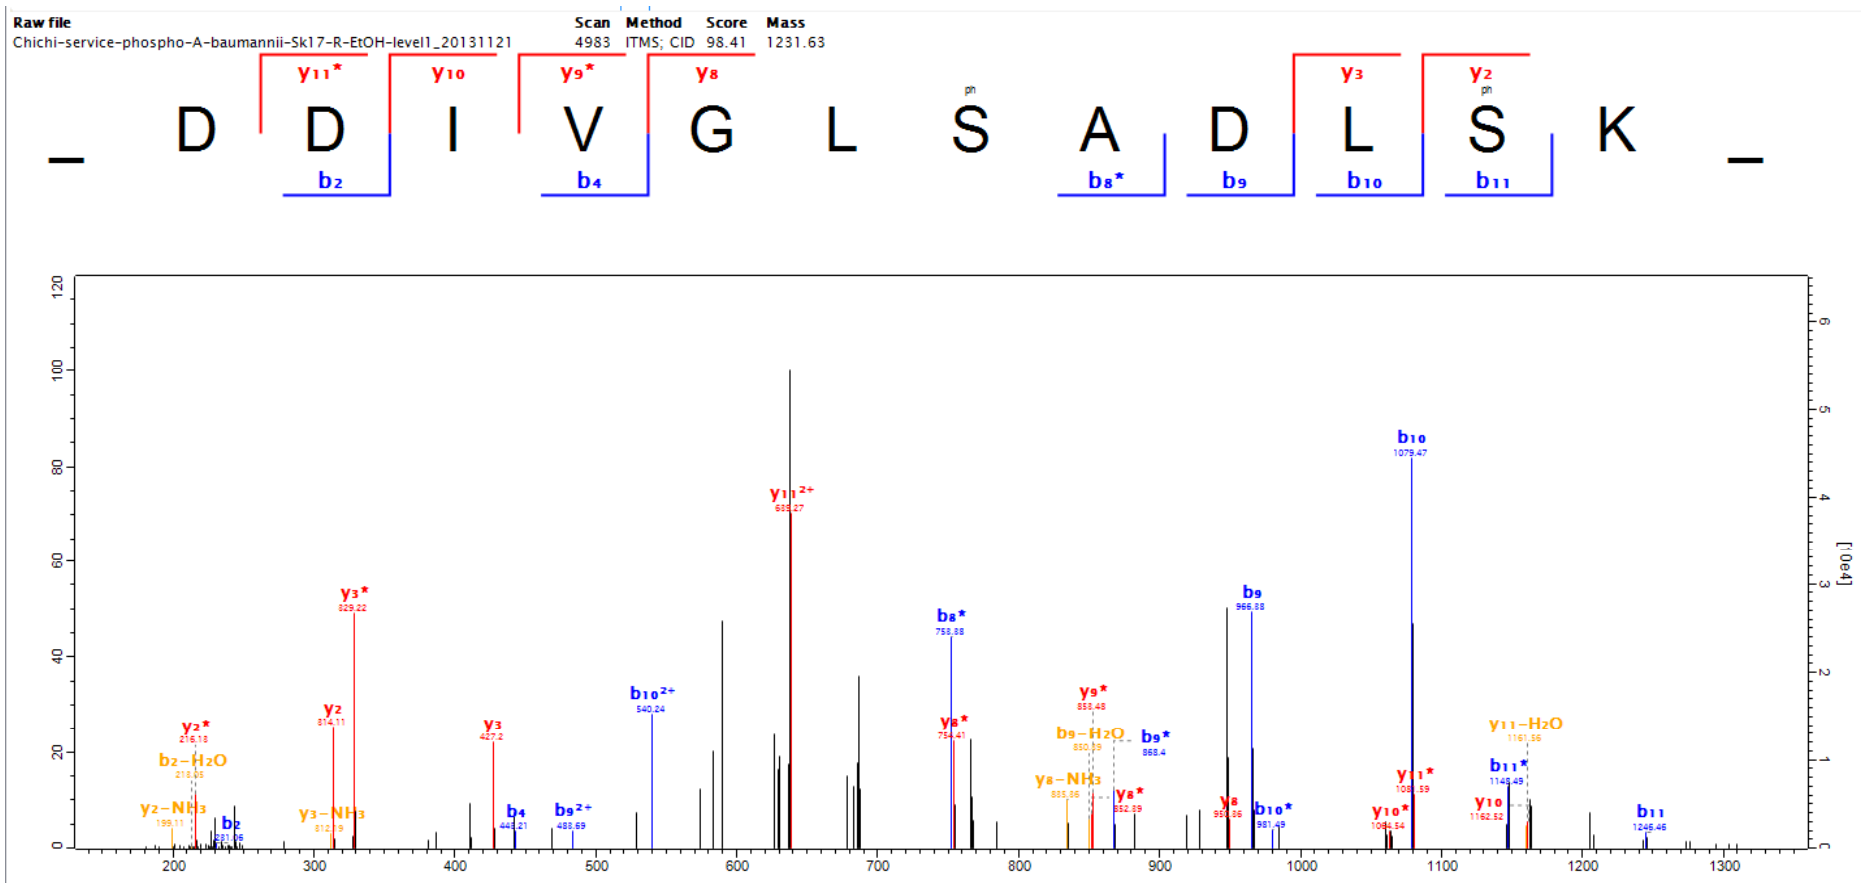

51-2

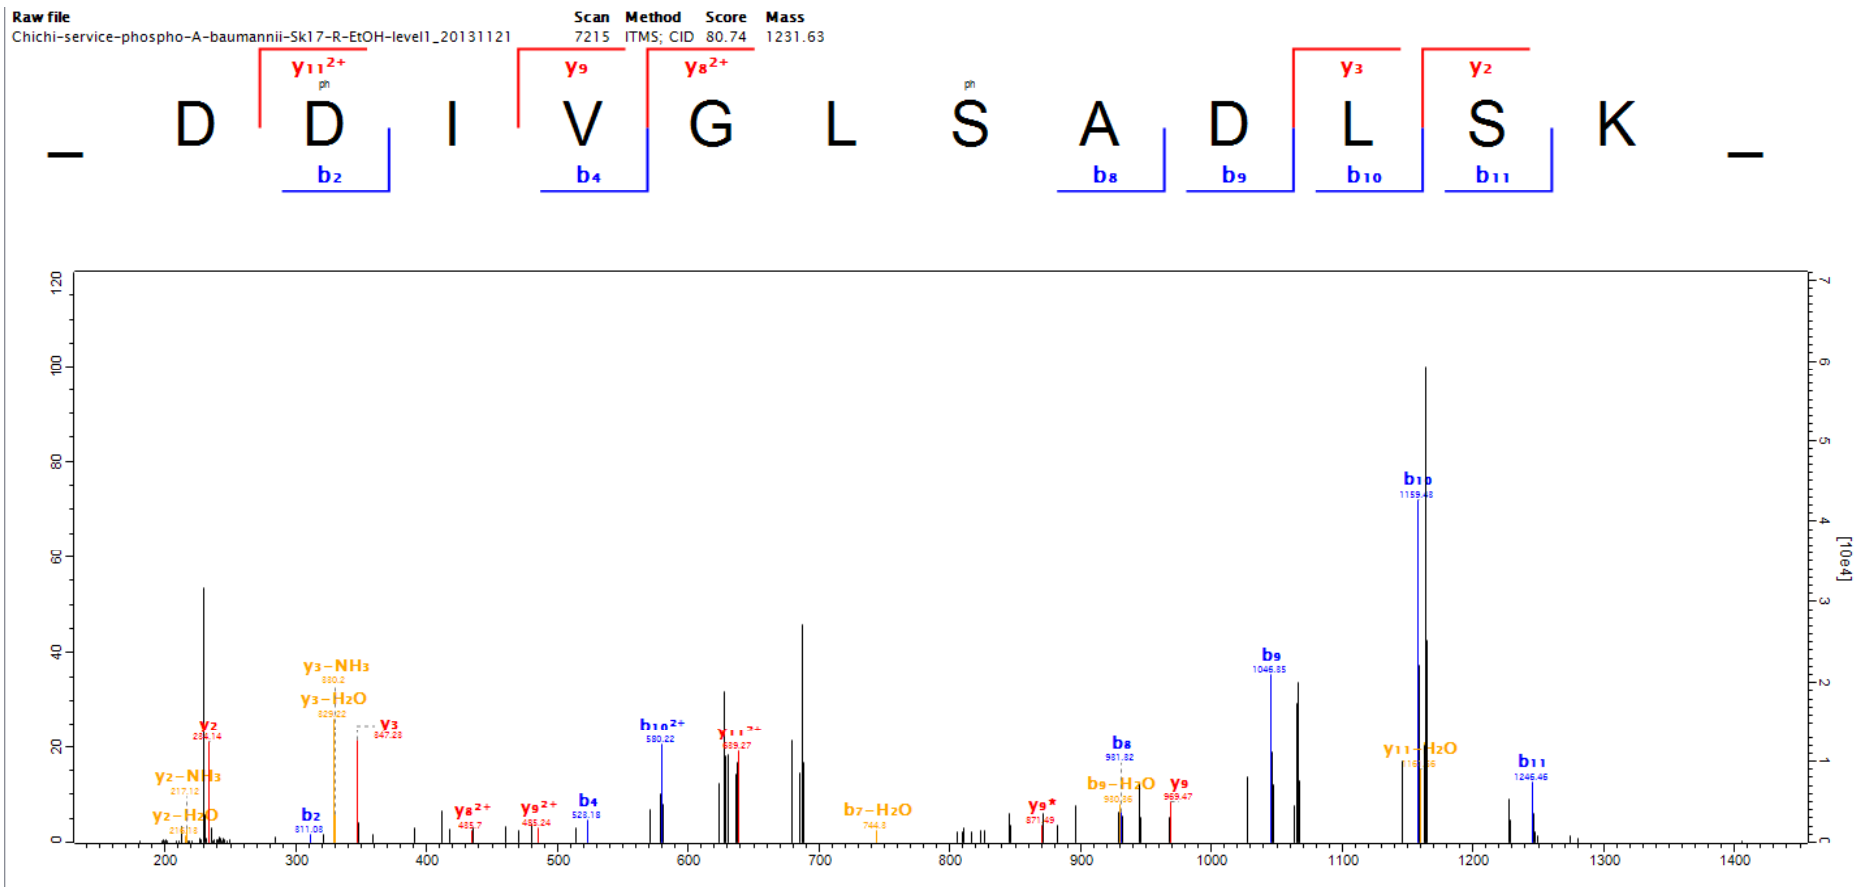

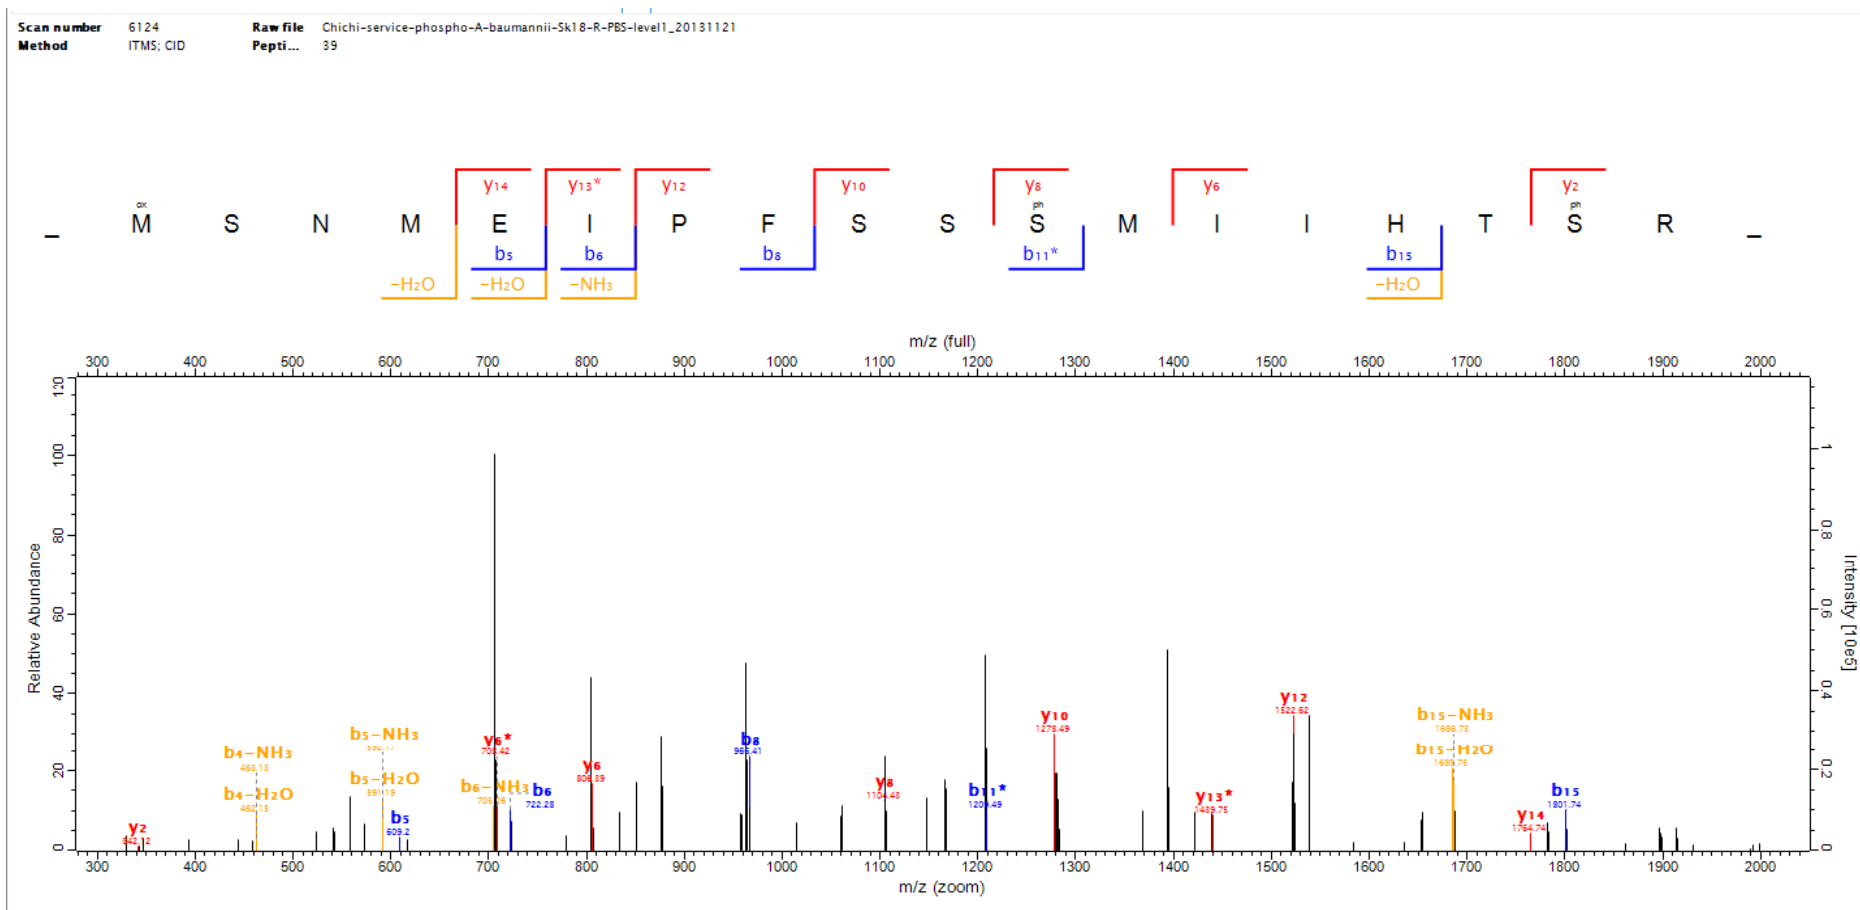

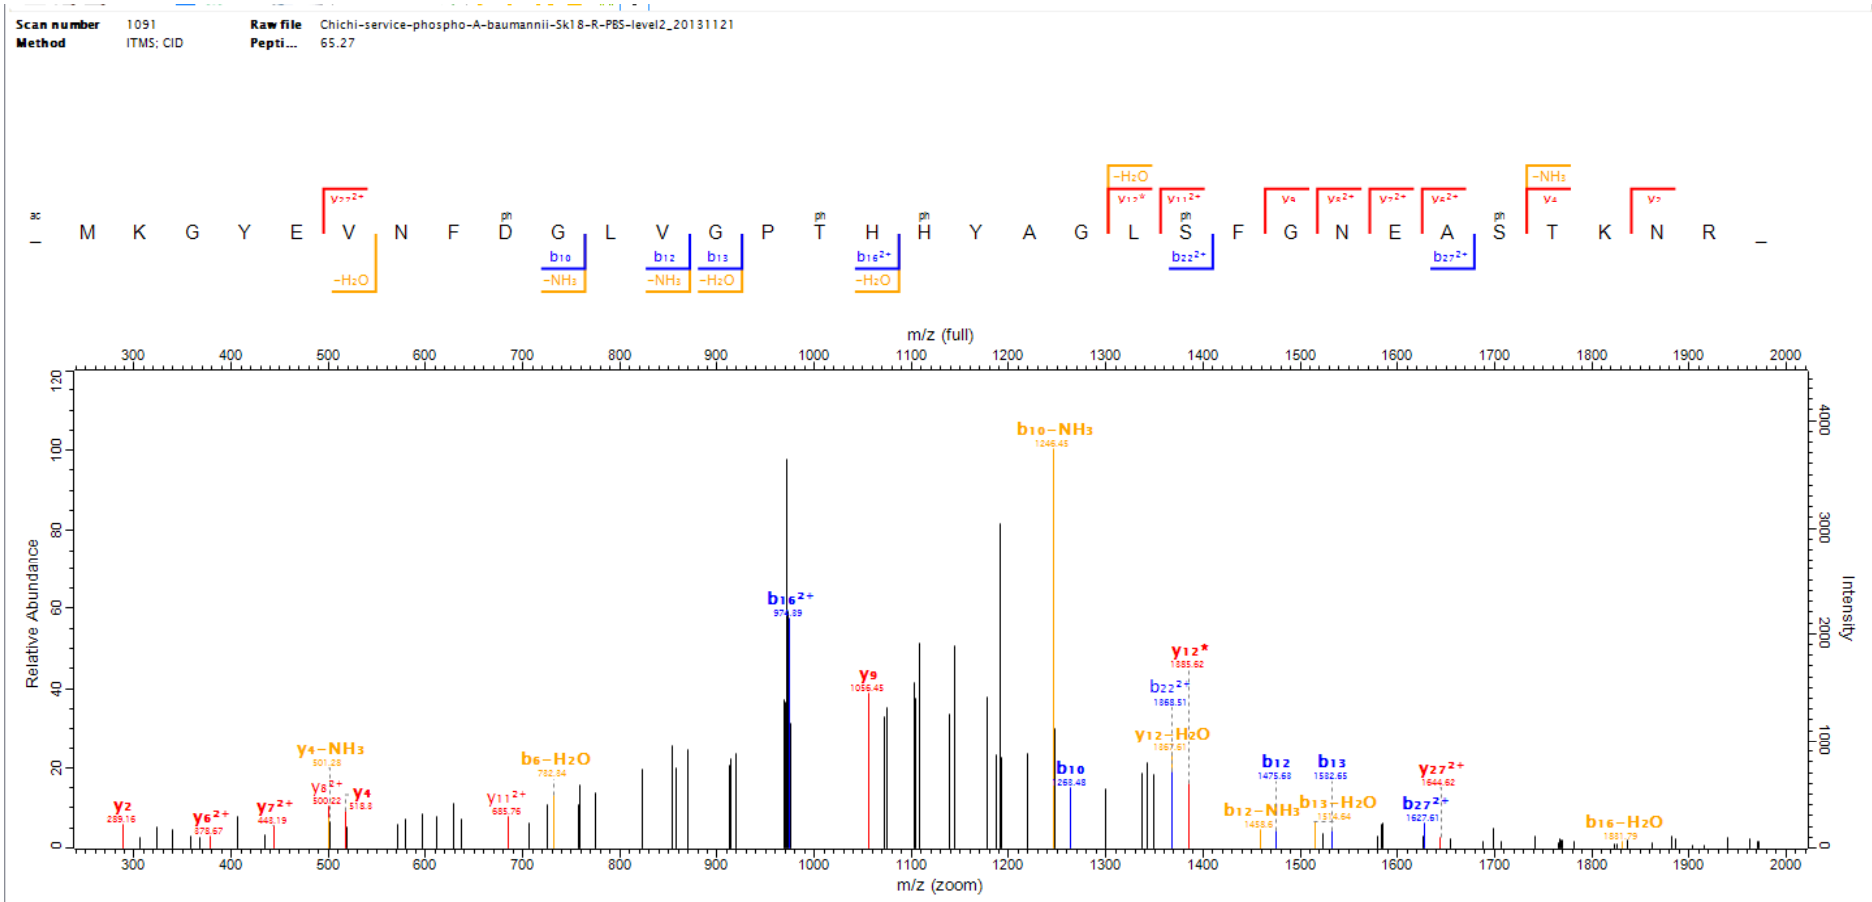

Raw file Scan Method Score Mass  
 SK18R-1 4347 ITMS; CID 71.14 1988.04

b<sub>3</sub>
y<sub>15</sub><sup>\*</sup>
 Q M E G A L A S<sup>ph</sup>
y<sub>10</sub><sup>2+</sup>
y<sub>8</sub>
y<sub>7</sub>
y<sub>6</sub>
y<sub>5</sub>
y<sub>4</sub>
y<sub>3</sub>
 N E K I D L S K V R

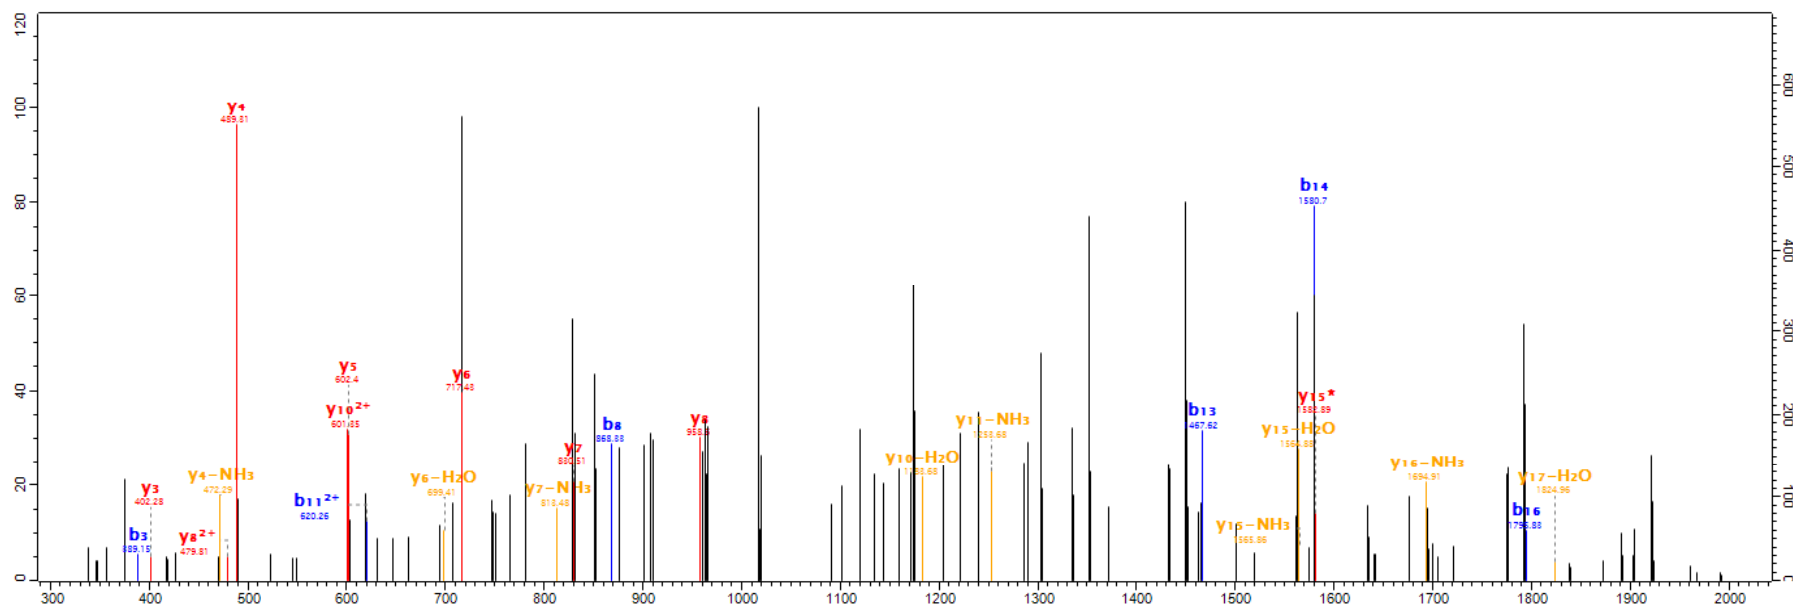

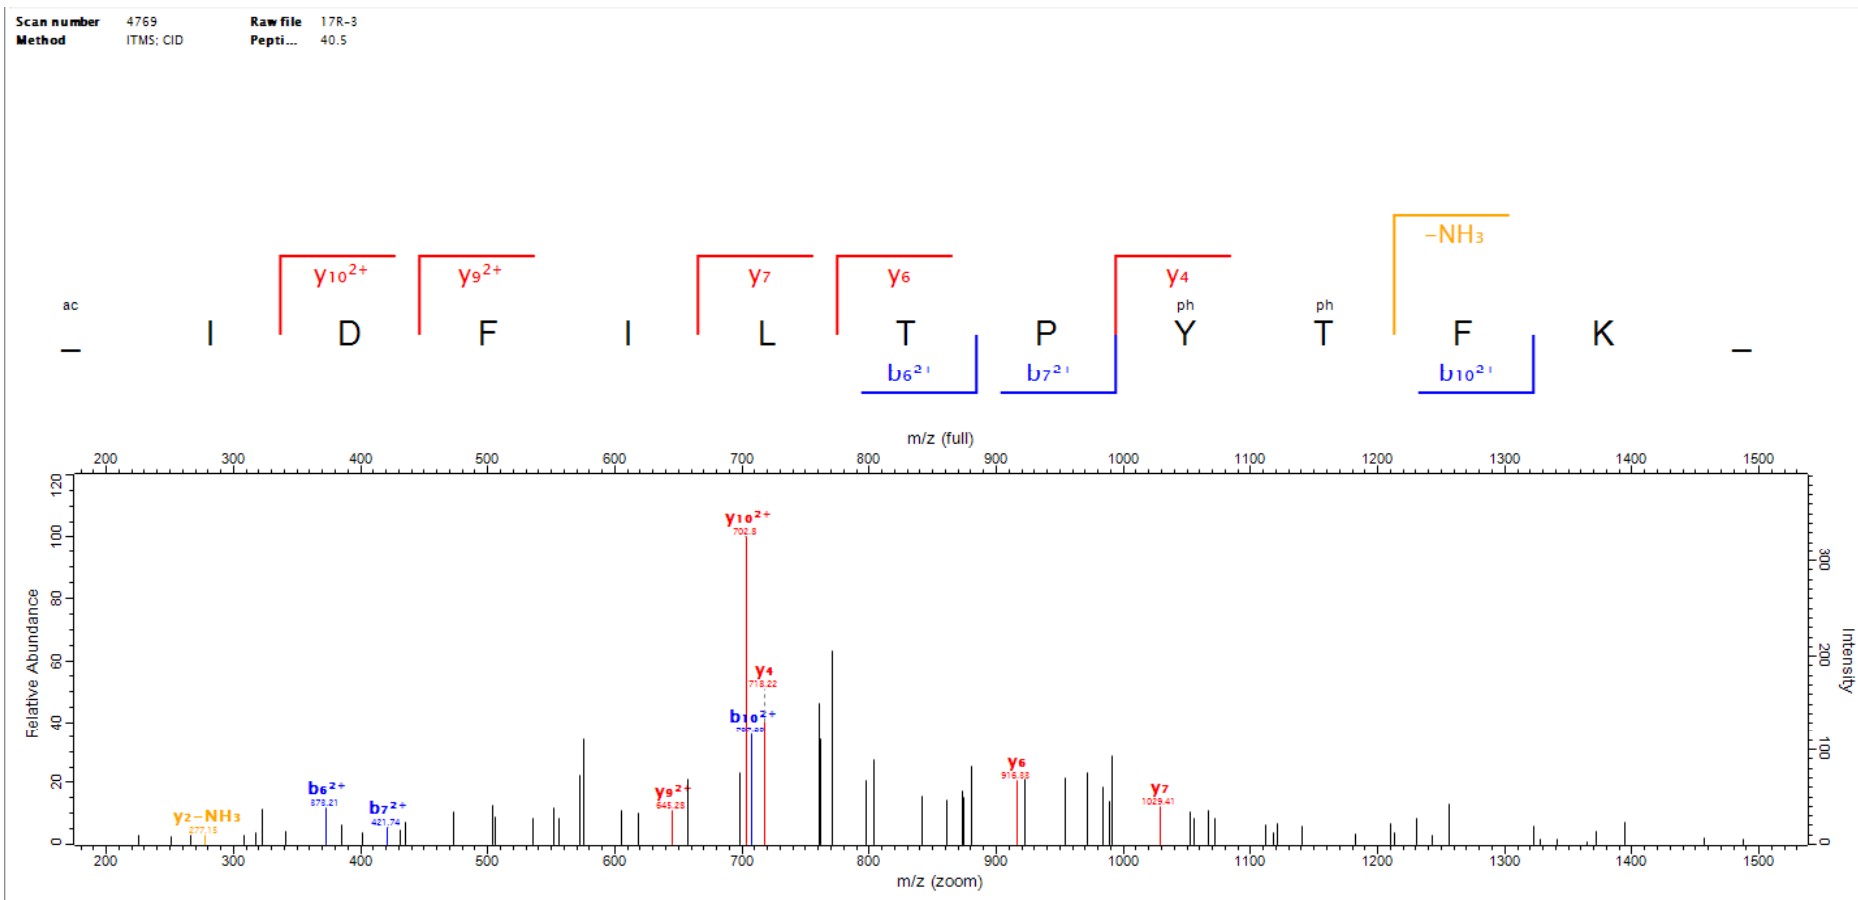

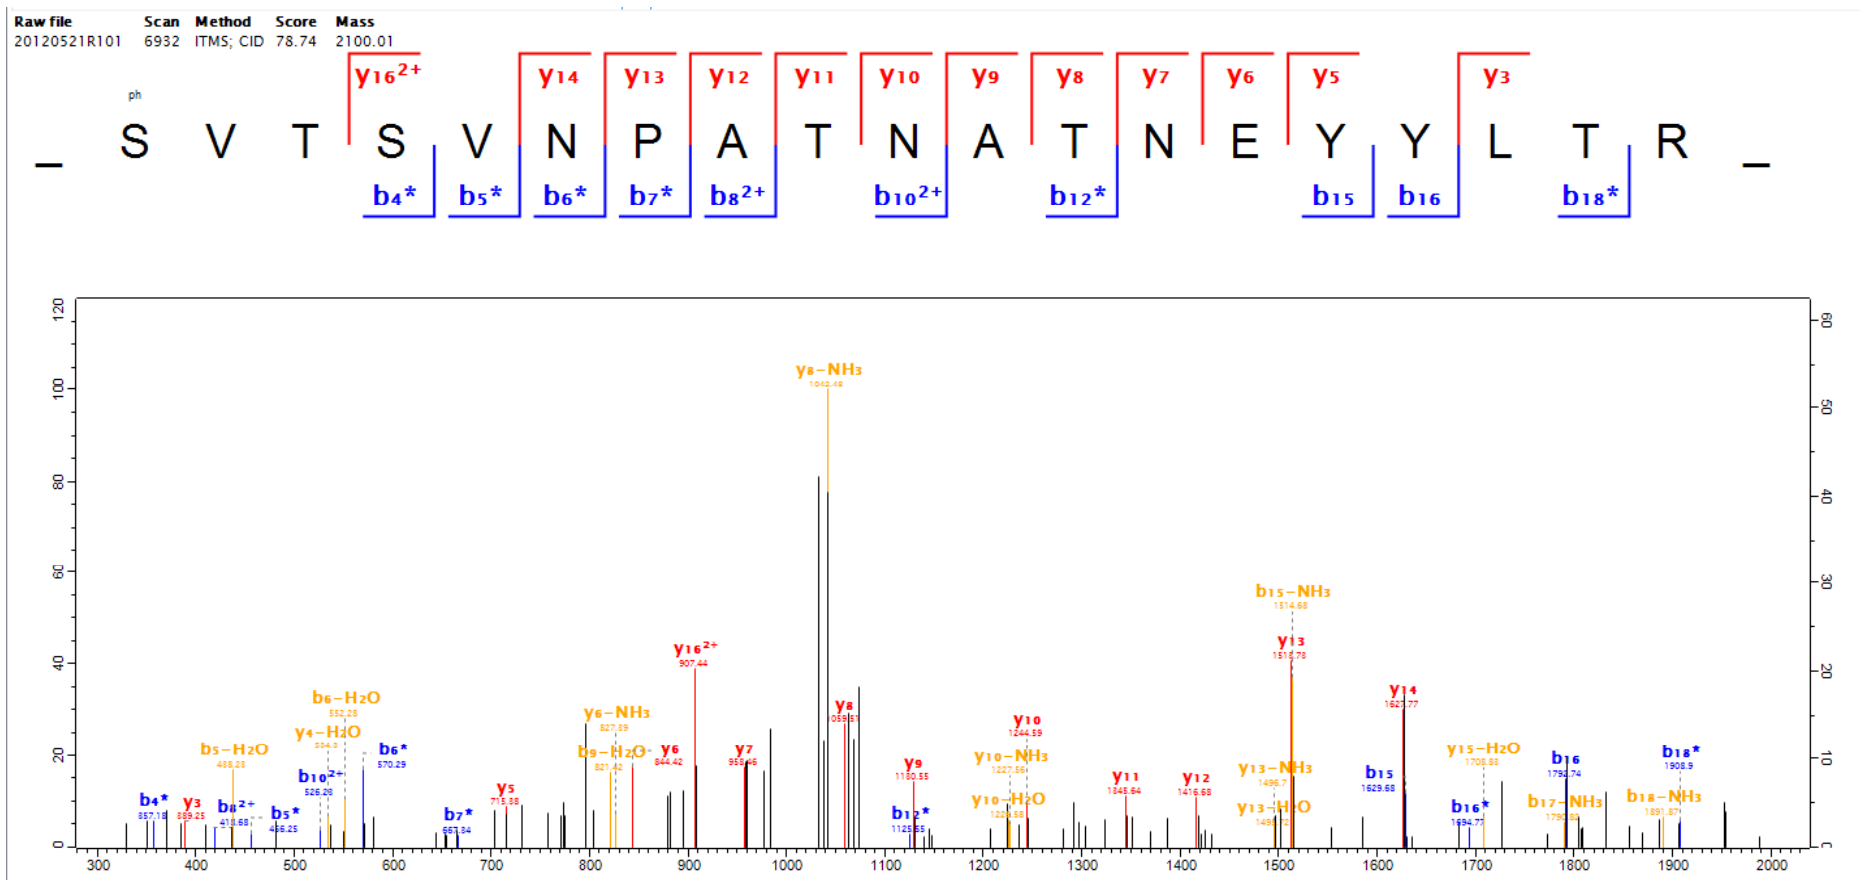



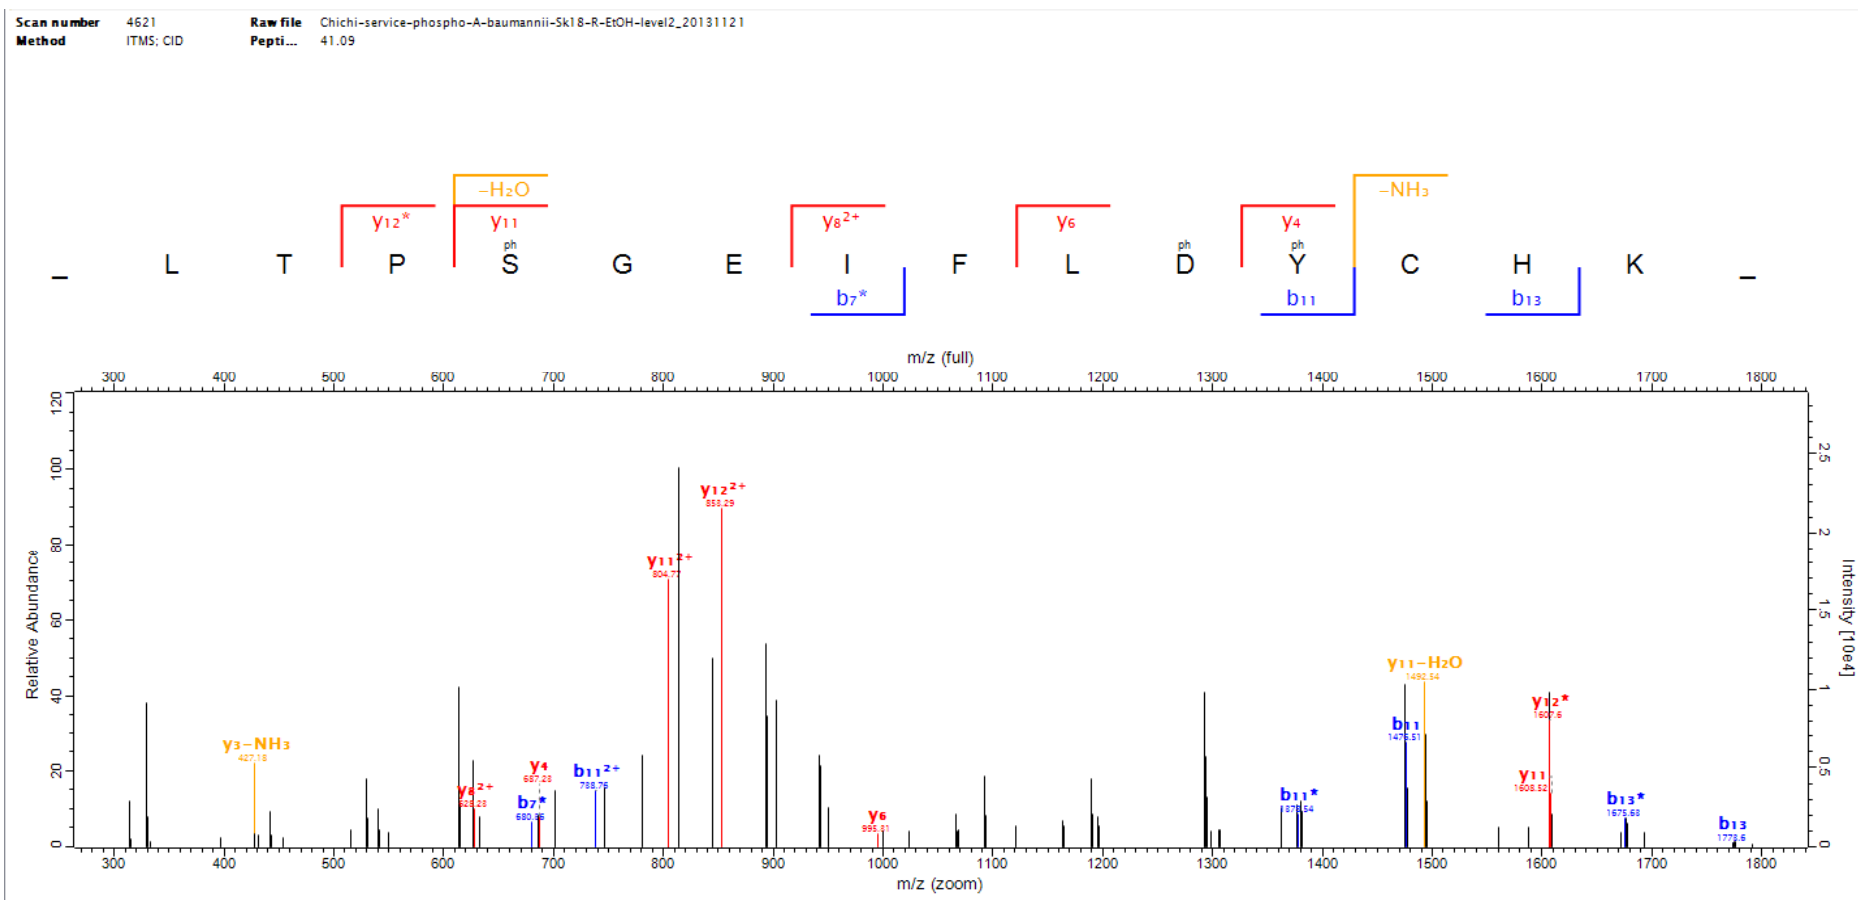

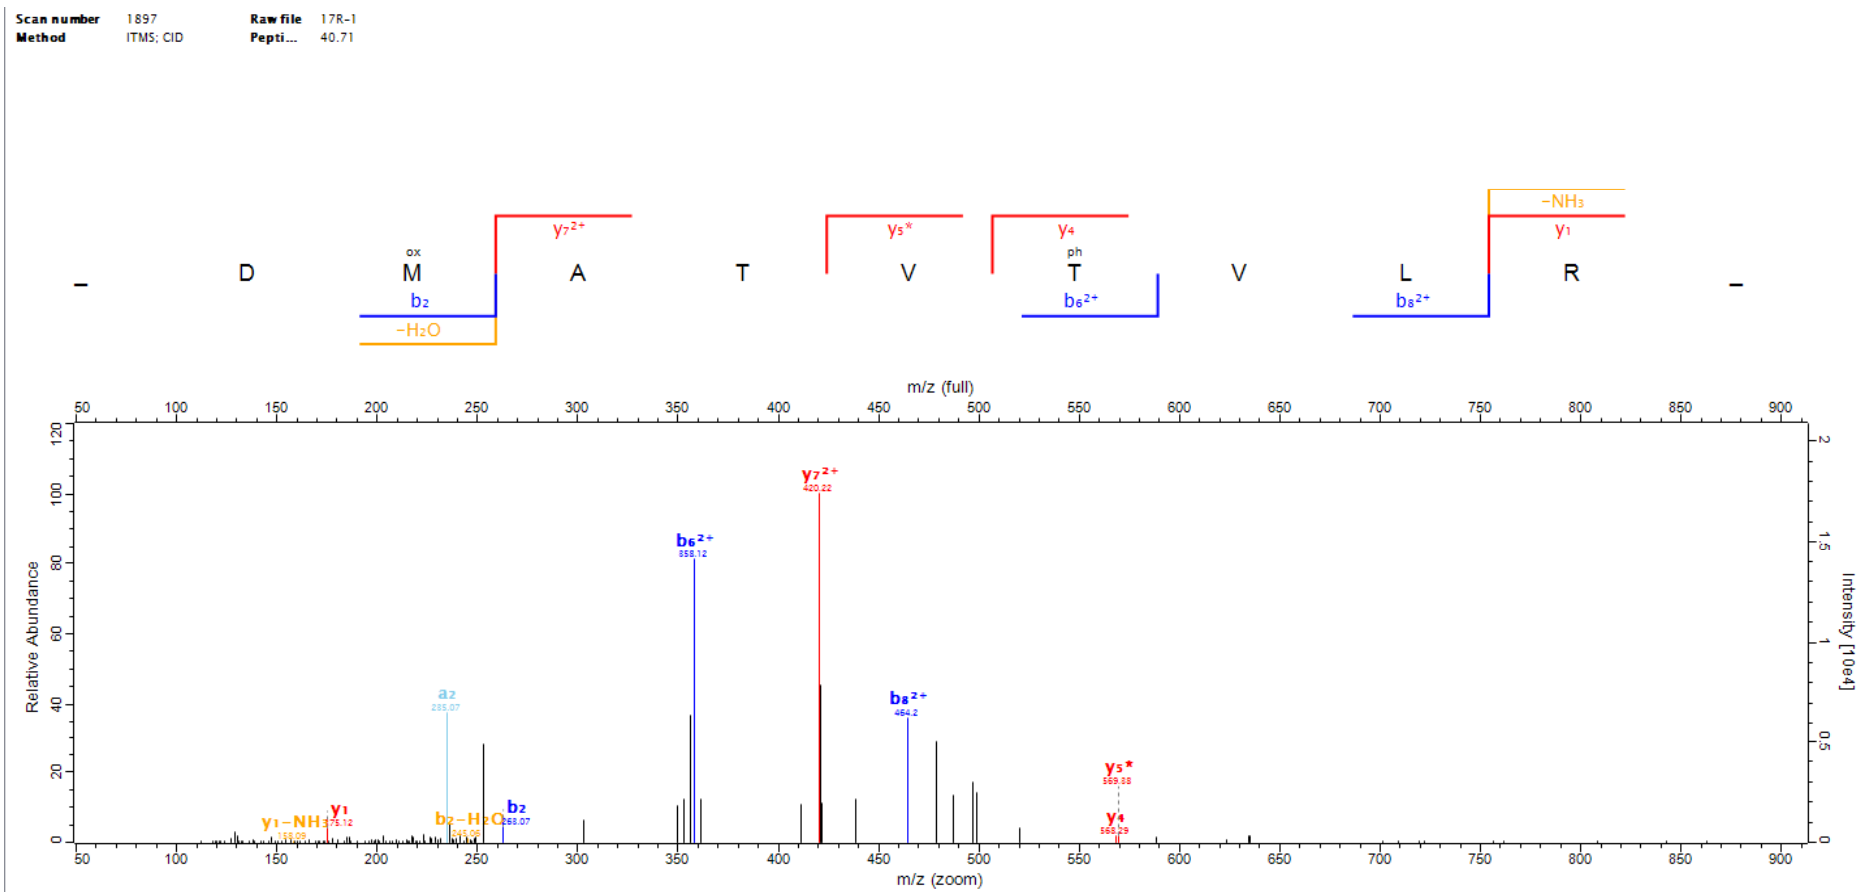

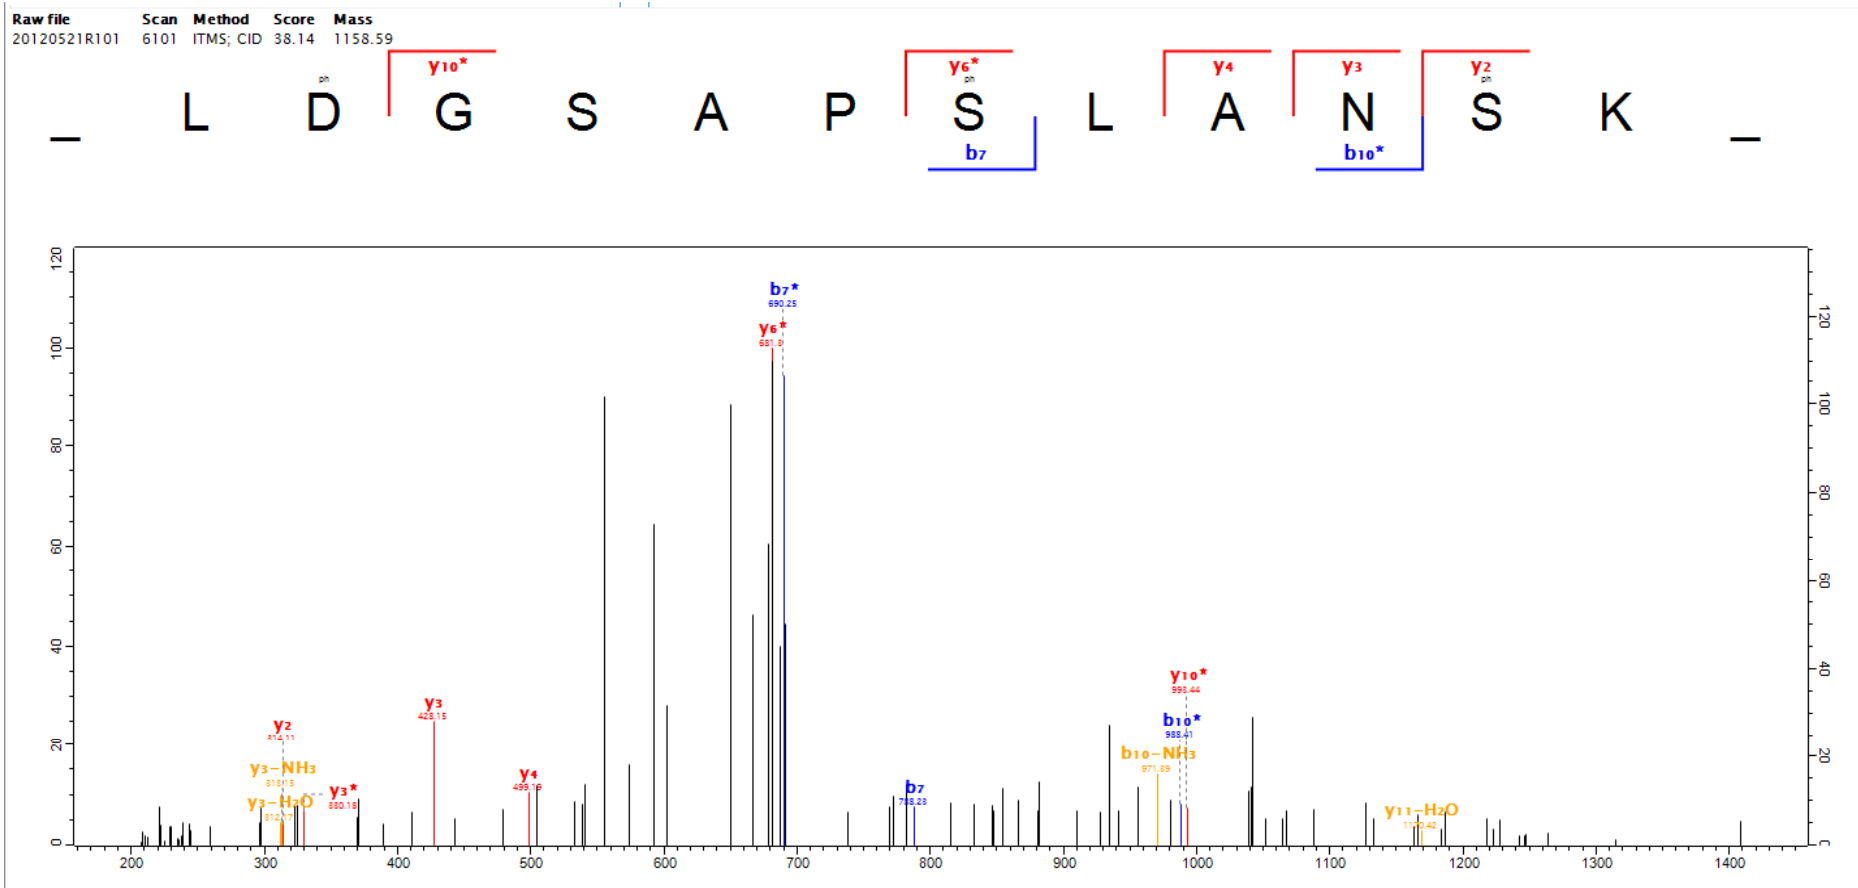

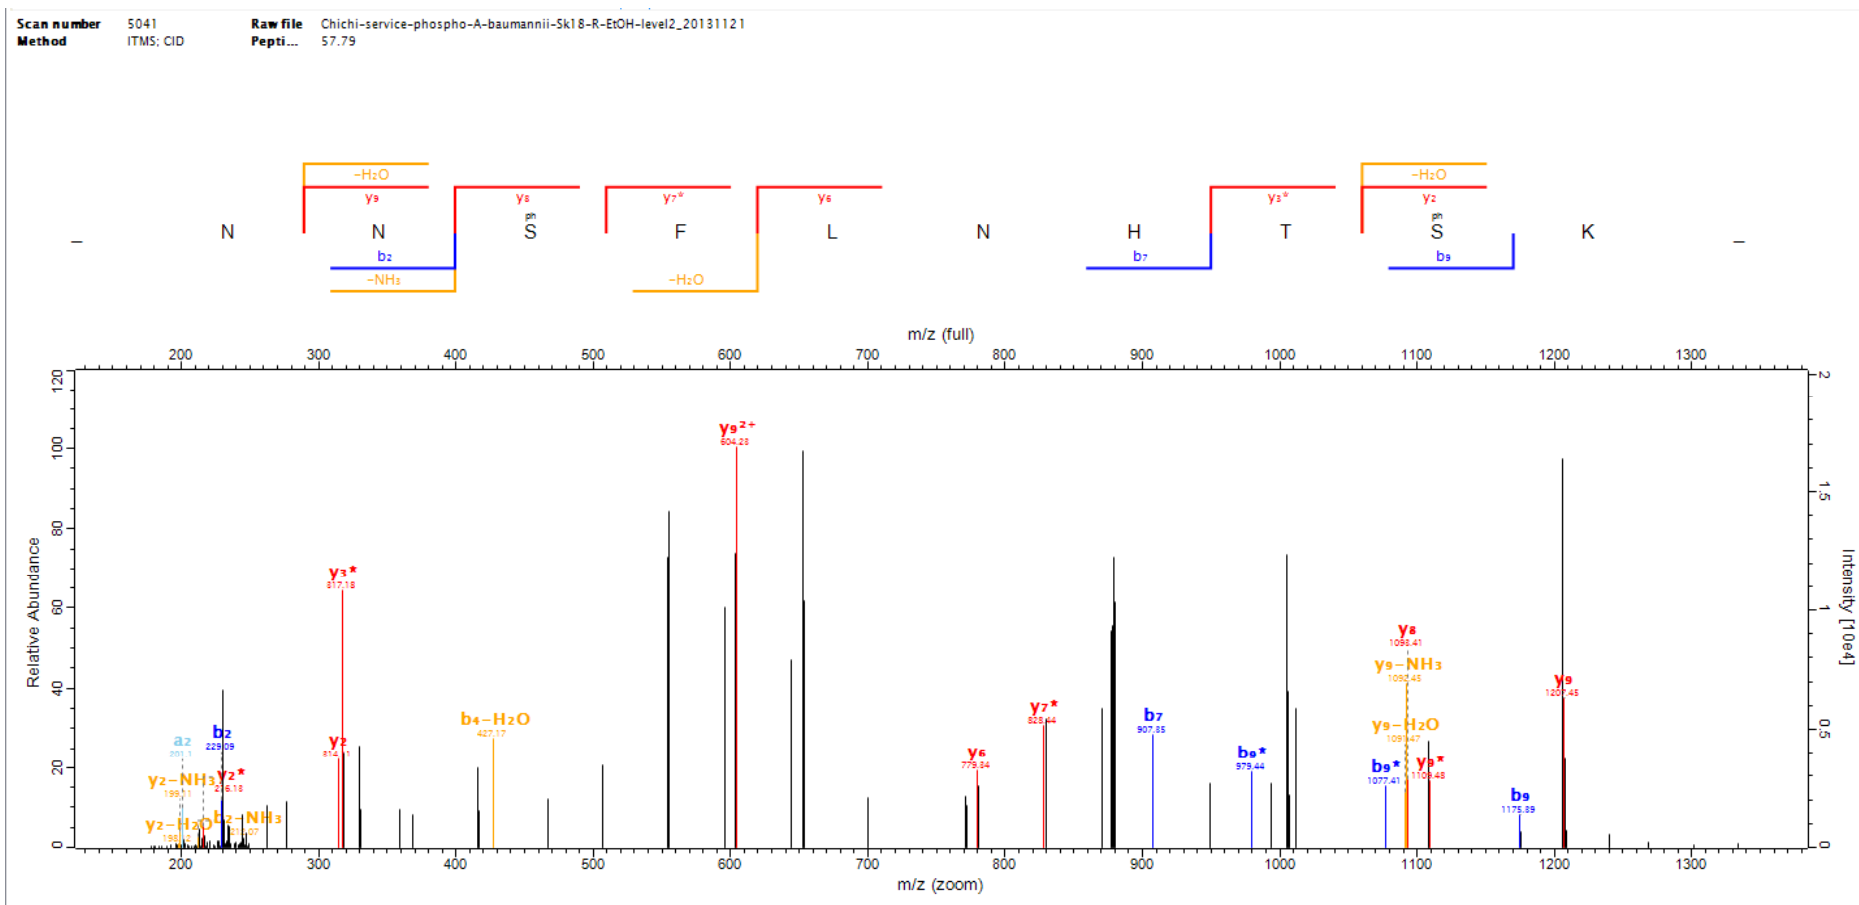

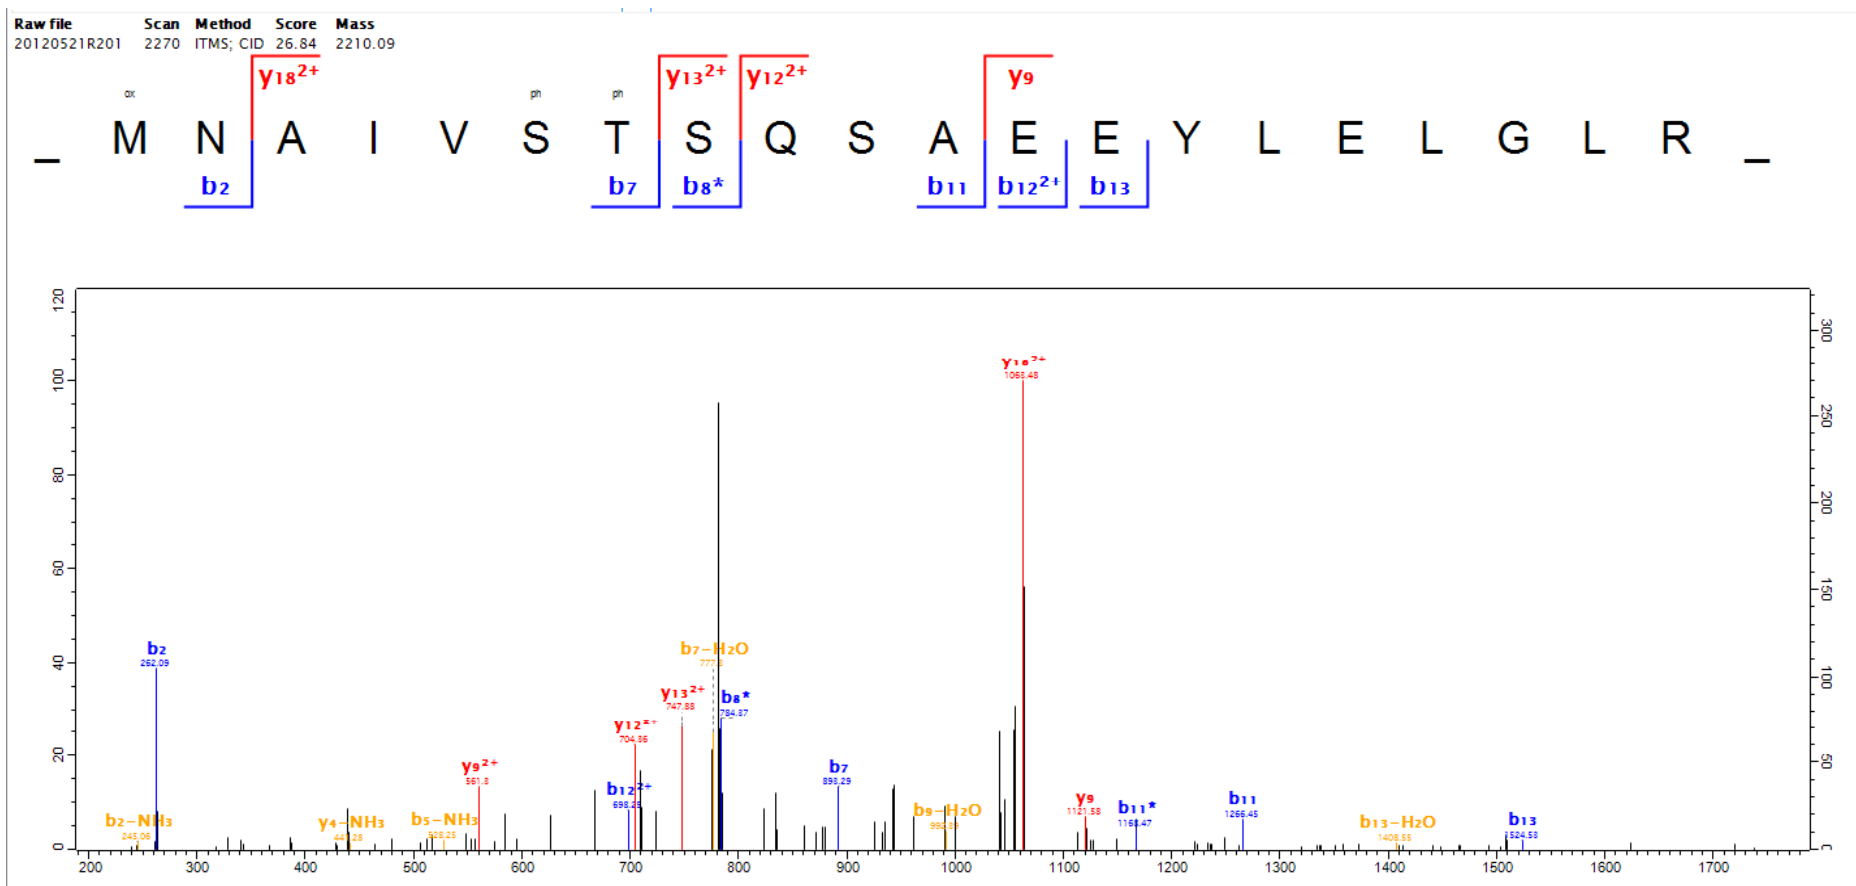

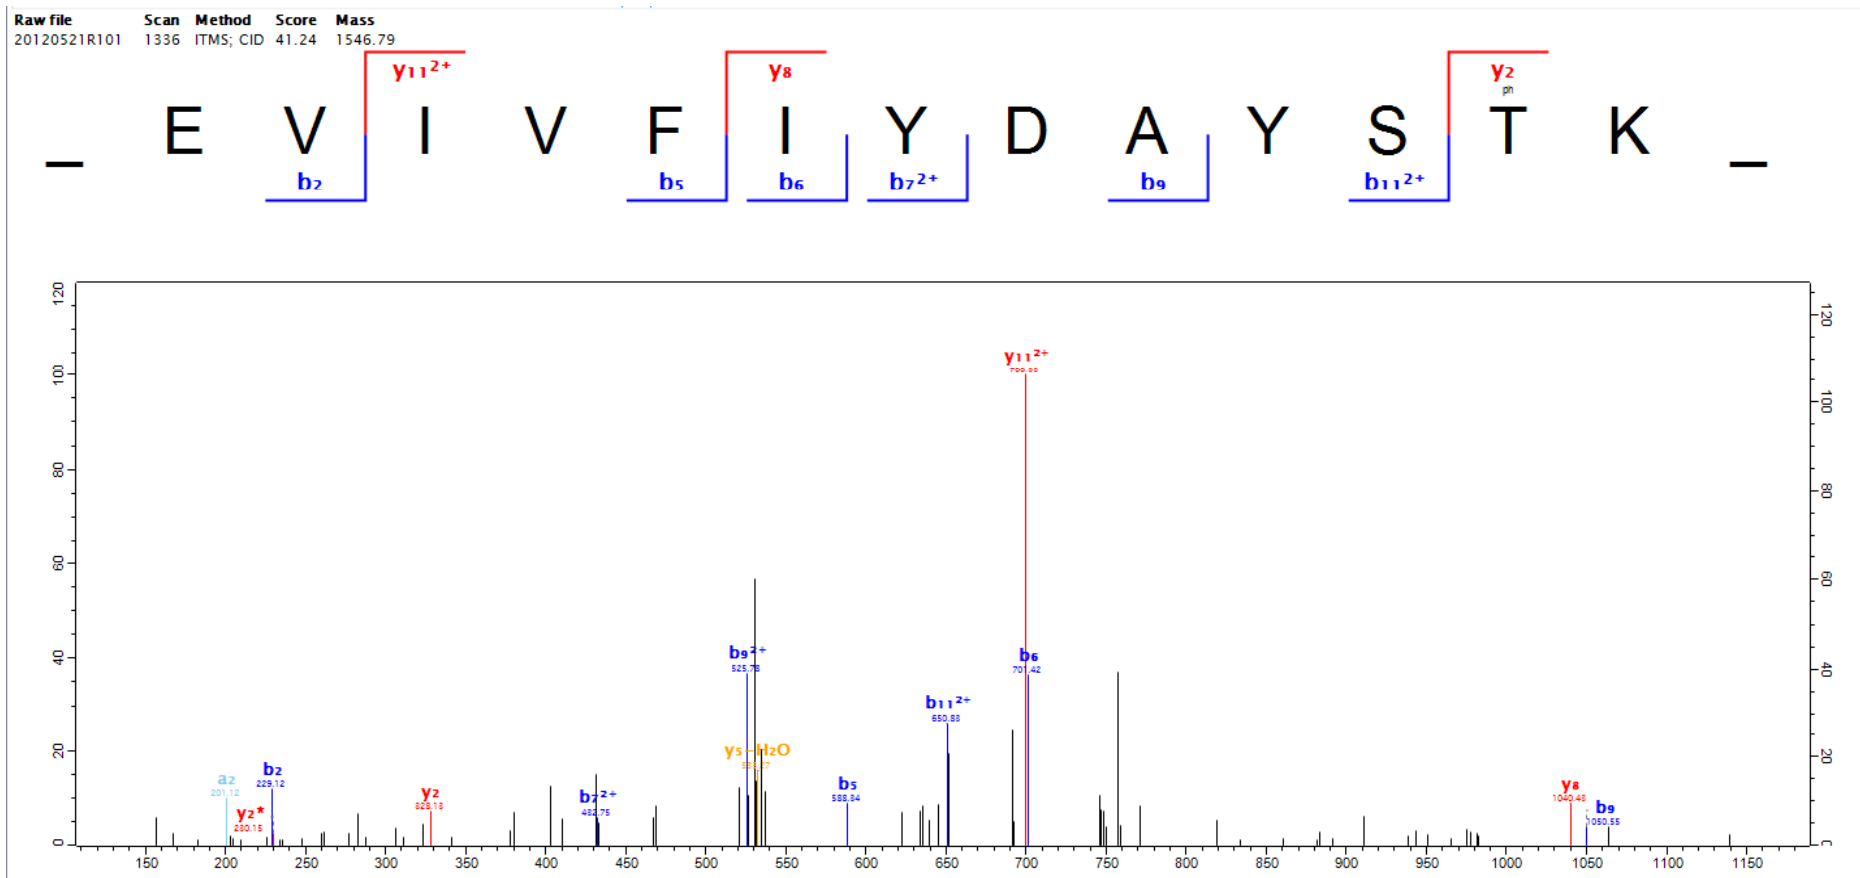

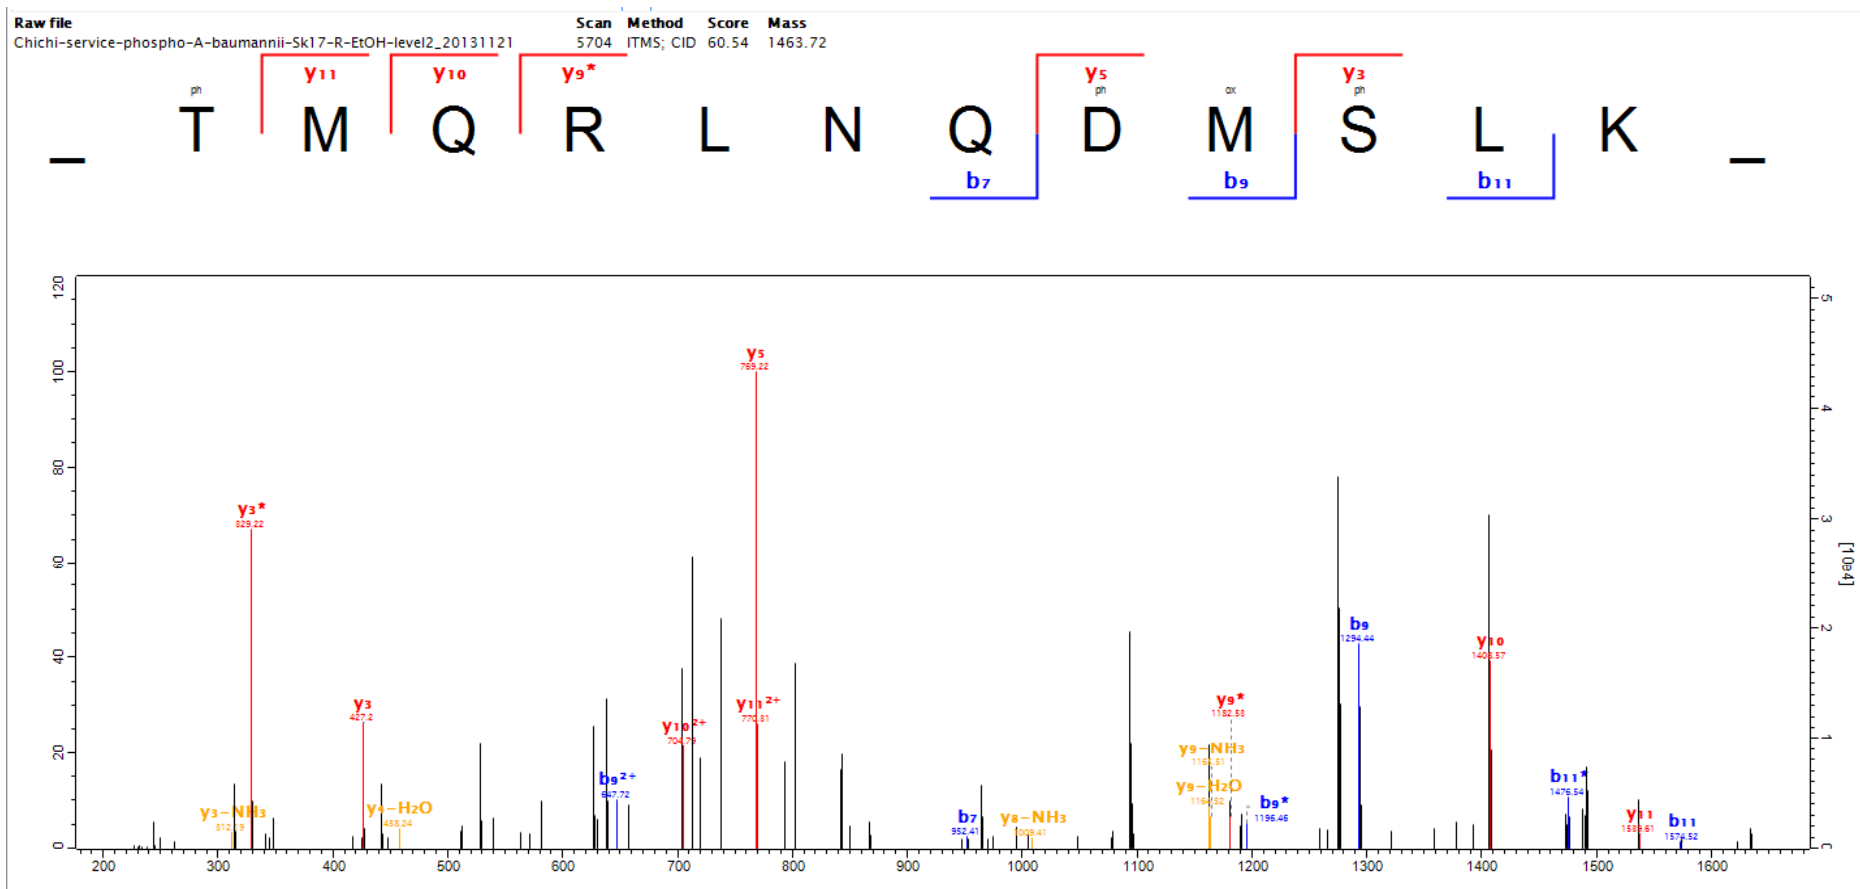

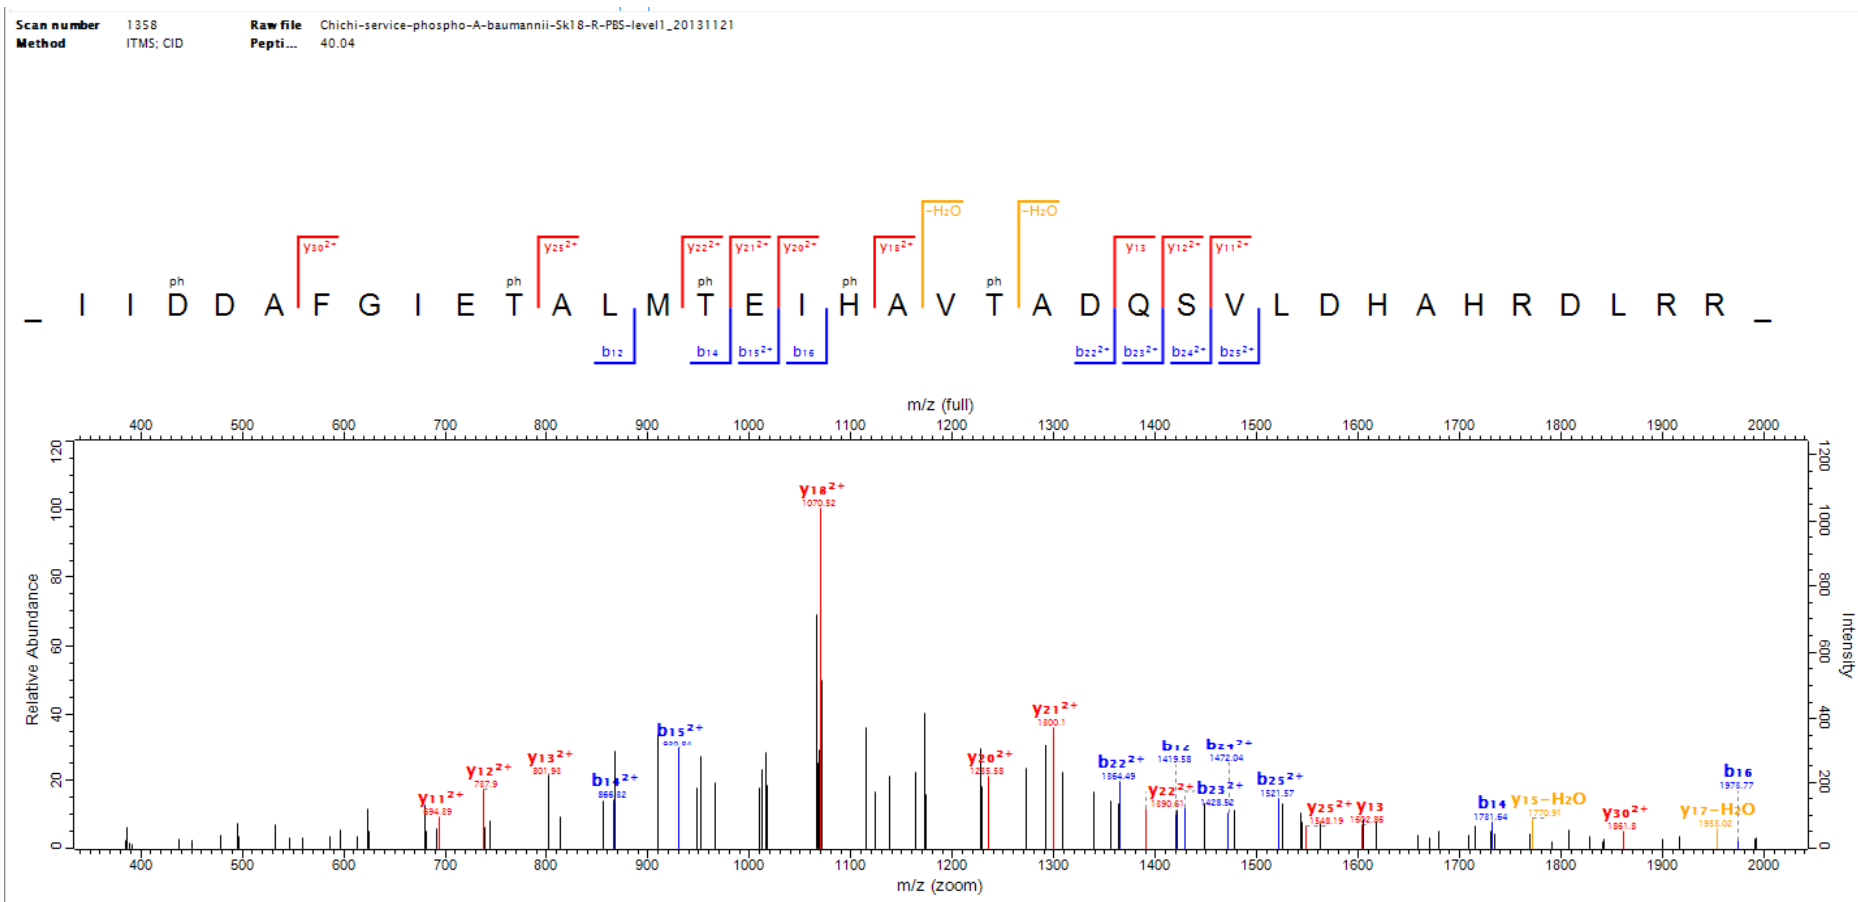



Scan number 14028 Raw file Chichi-service-phospho-A-baumanni-Sk1 8-R-PBS-level1\_20131121  
 Method ITMS: CID Pepti... 31.6

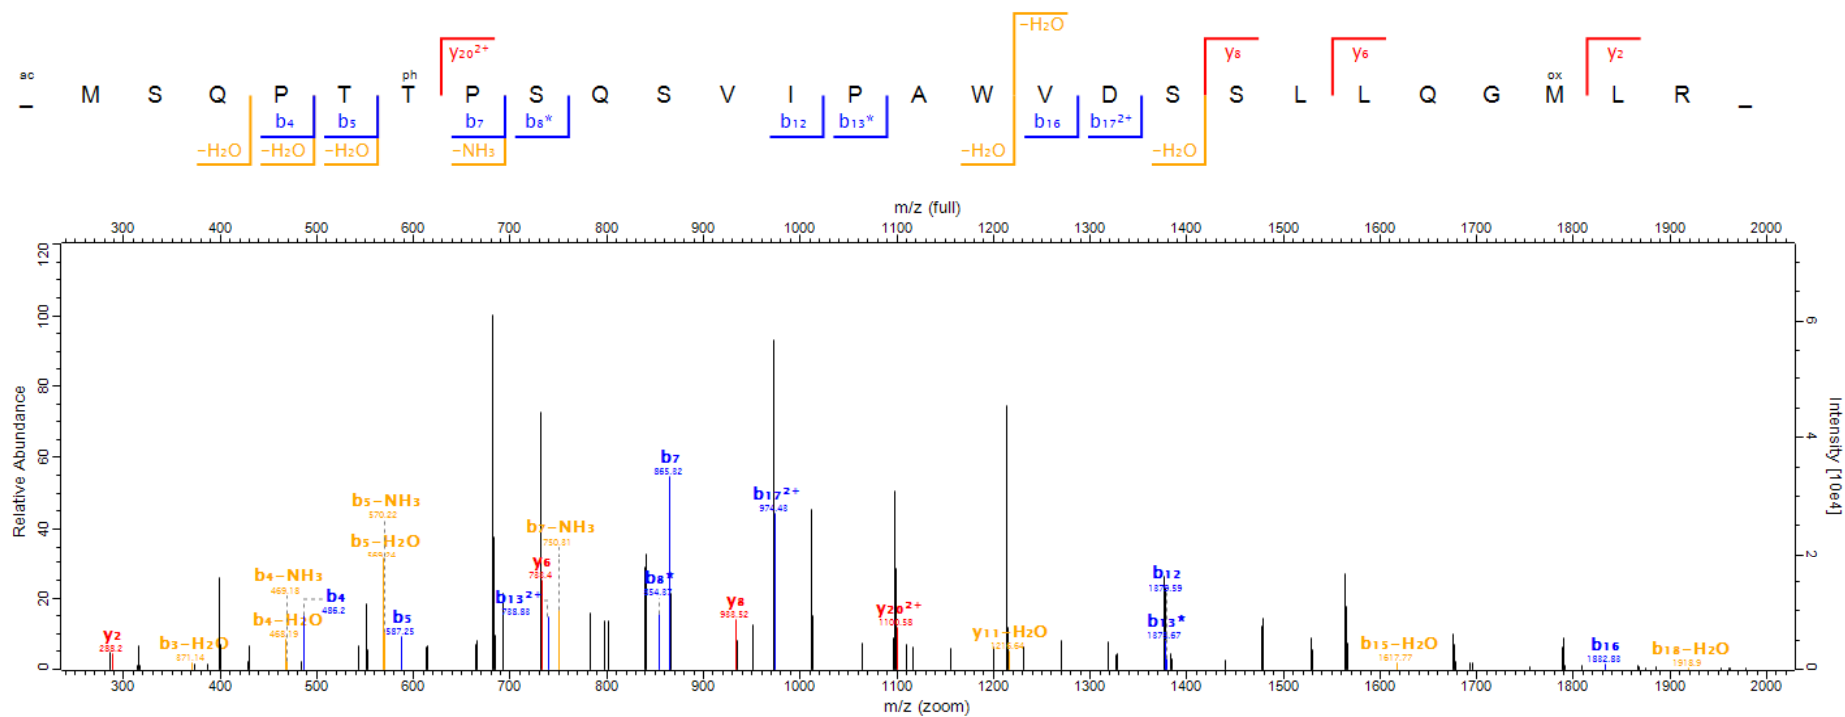

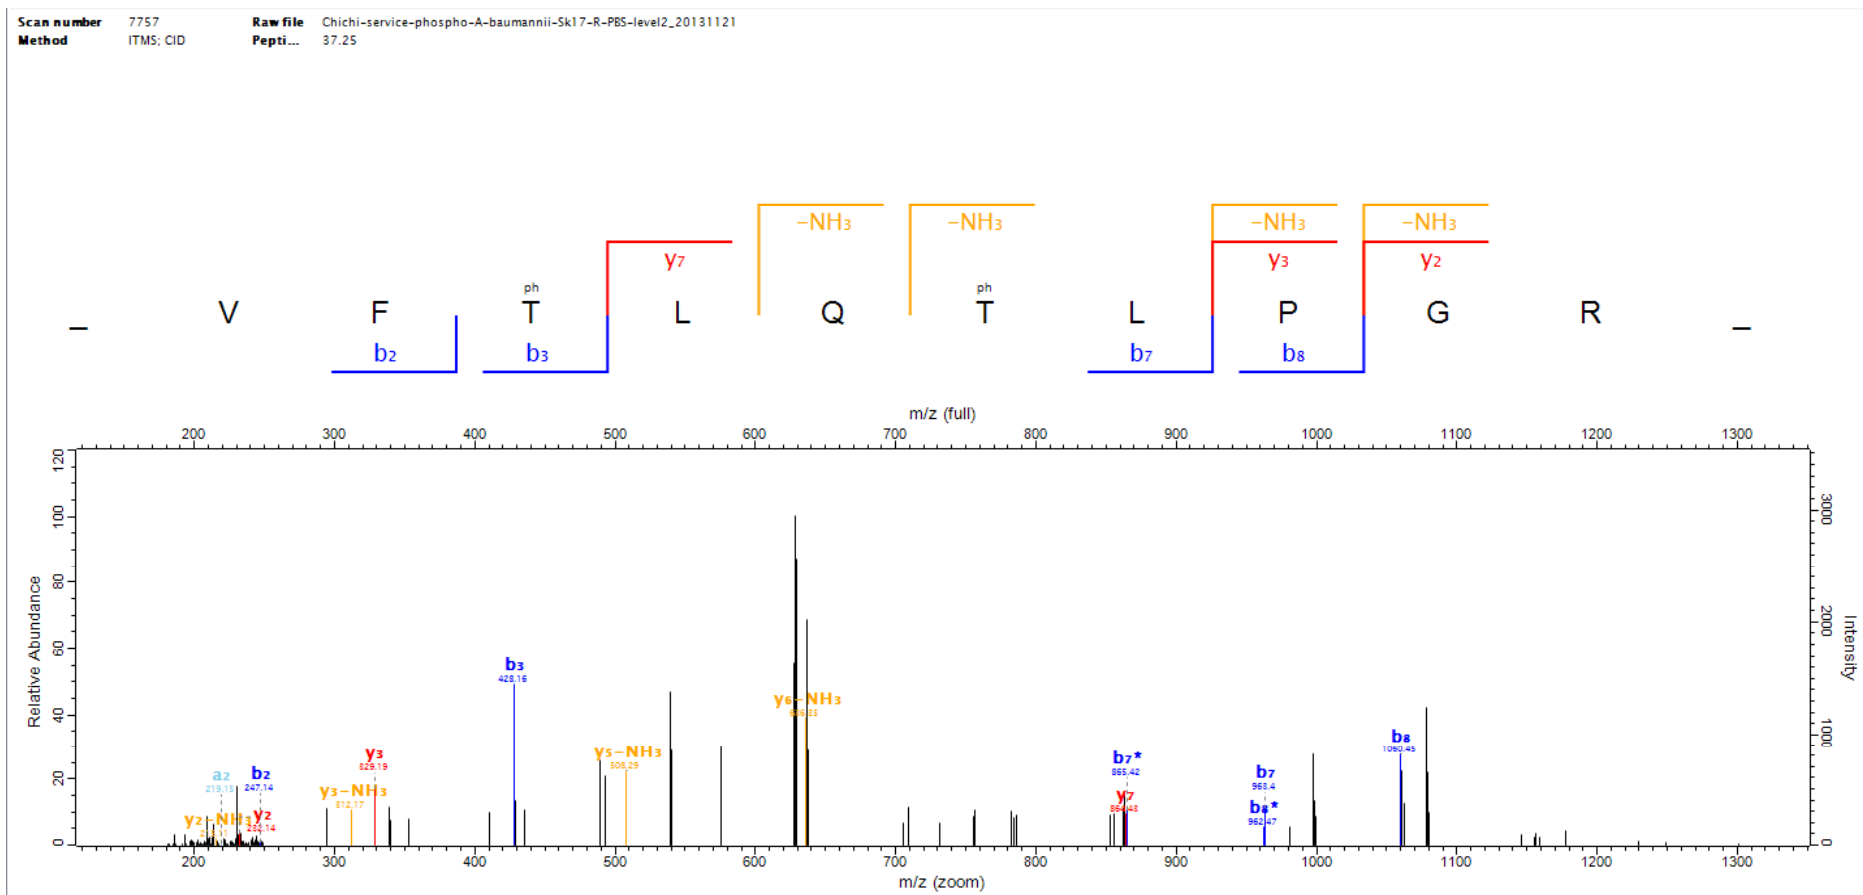

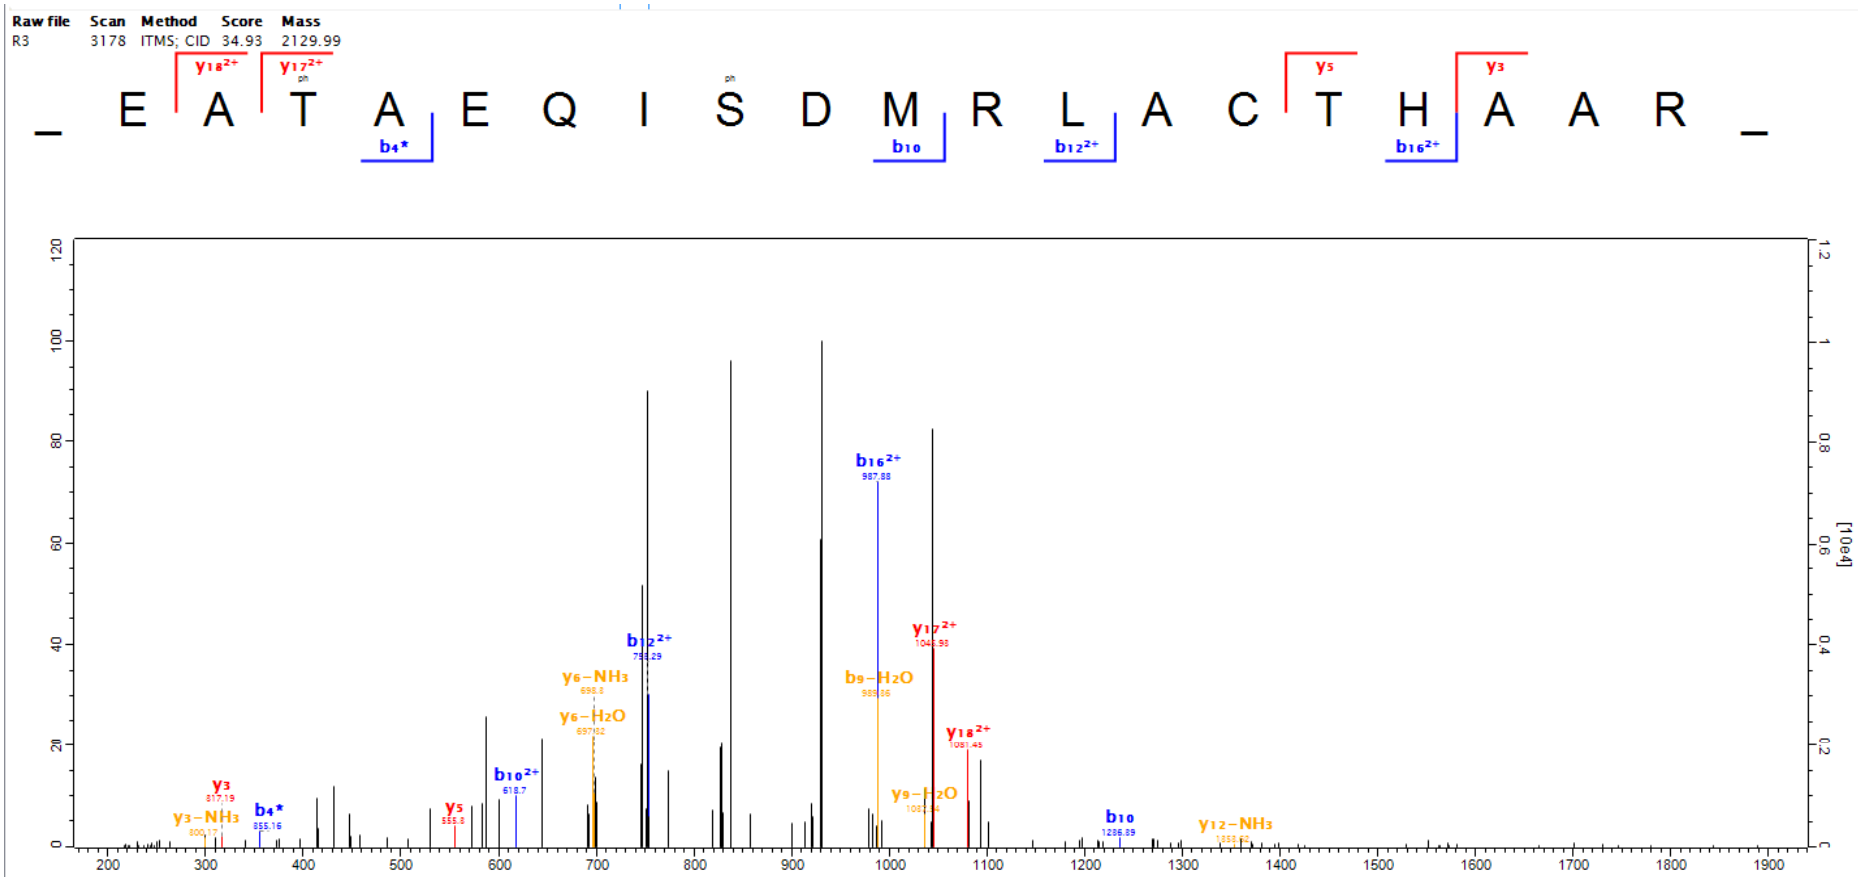

68-1

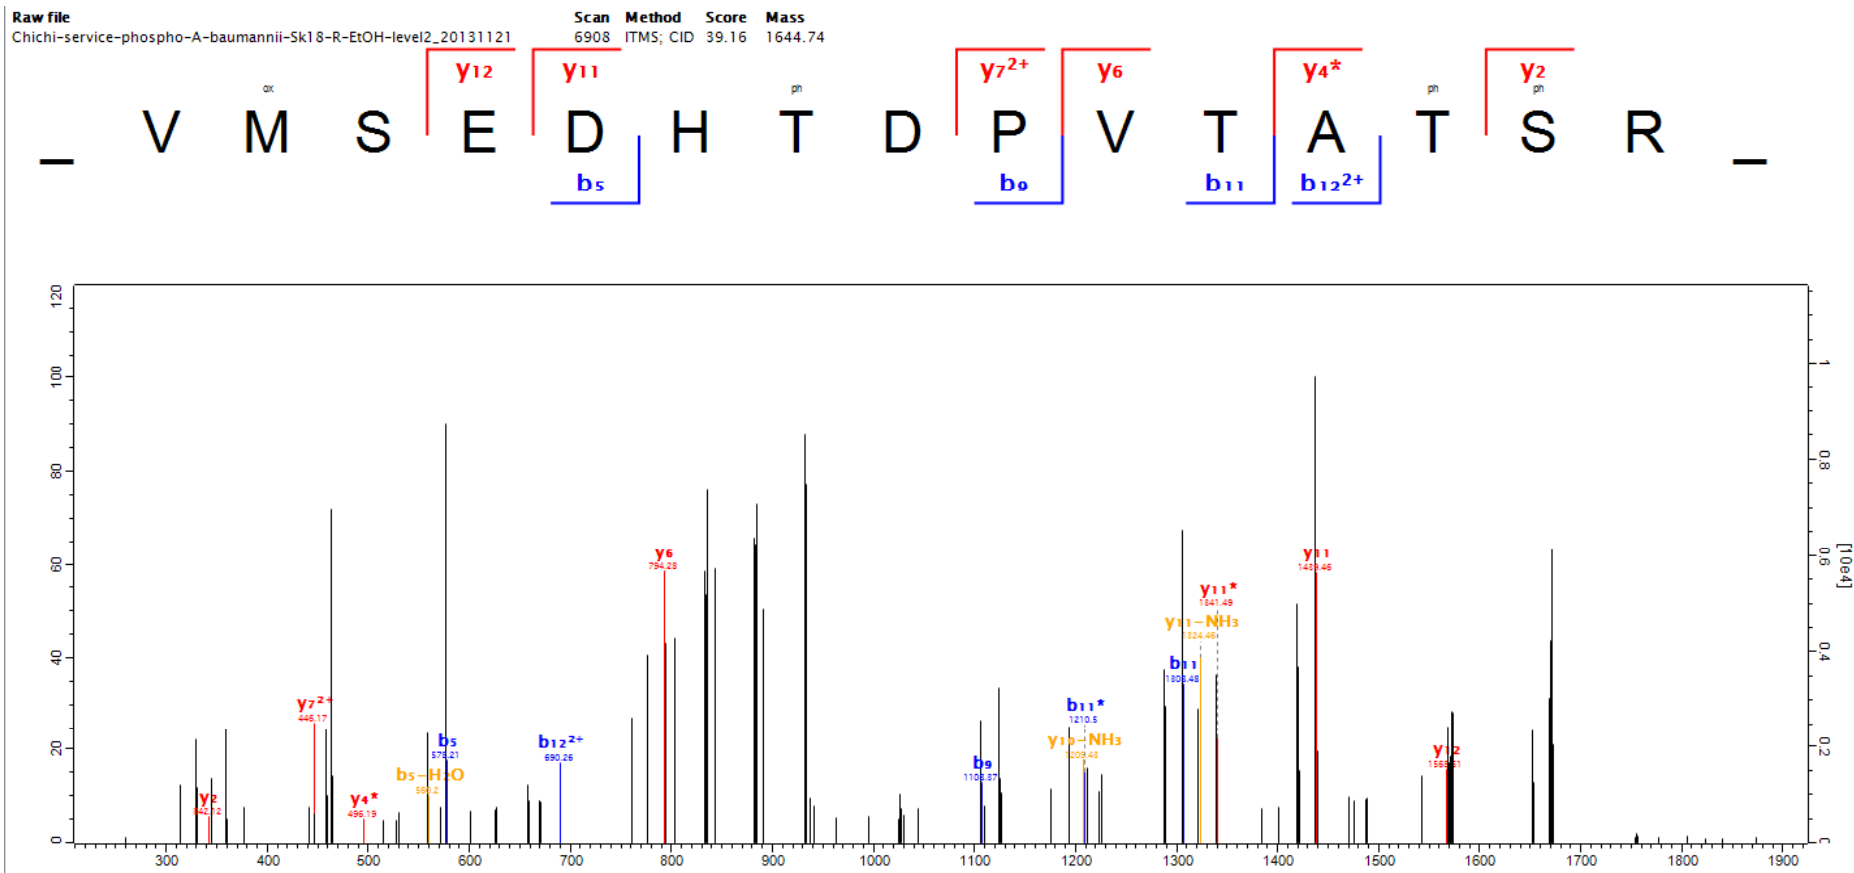

68-2

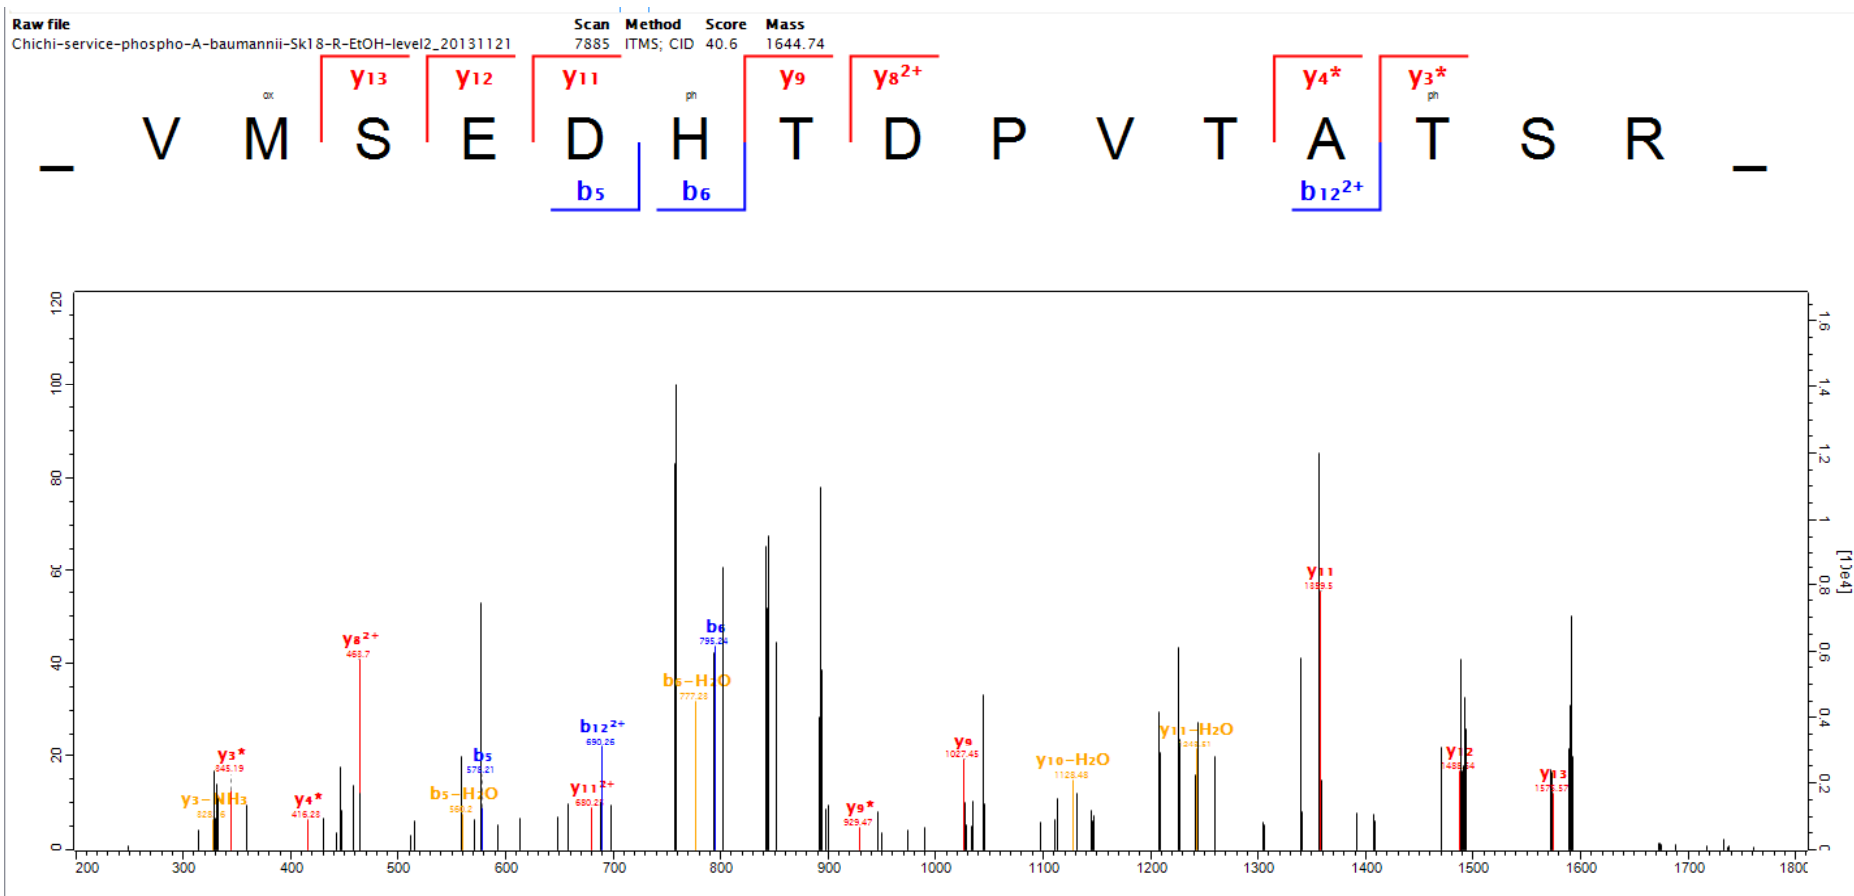

Scan number 5093 Raw file 20120521R101  
 Method ITMS: CID Pepti... 45.35

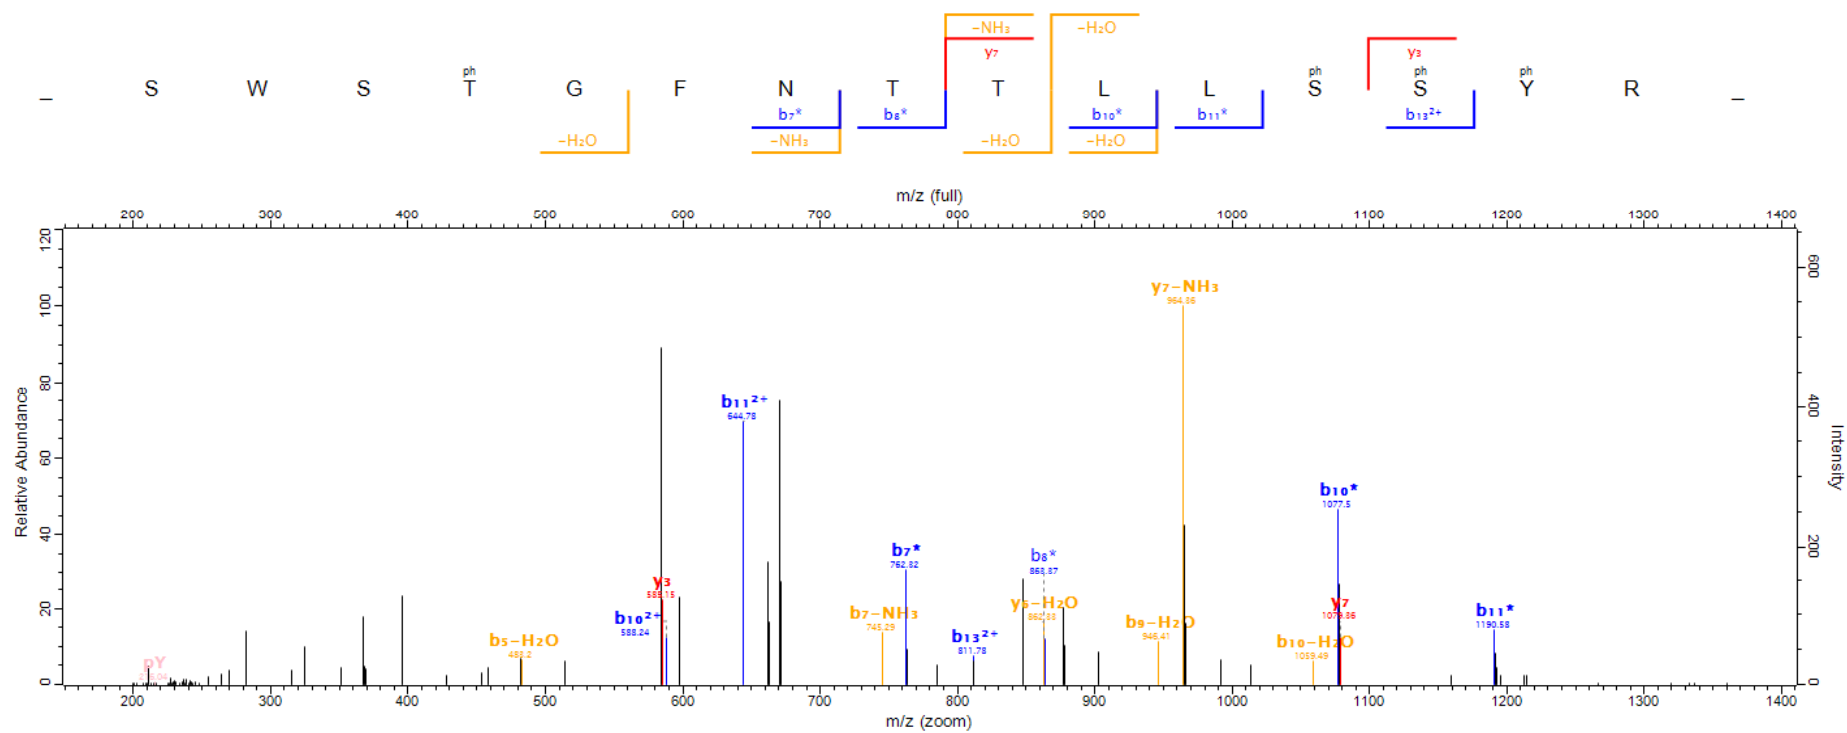

Raw file SK17R-1 Scan 527 Method ITMS; CID Score 62.09 Mass 1640.75

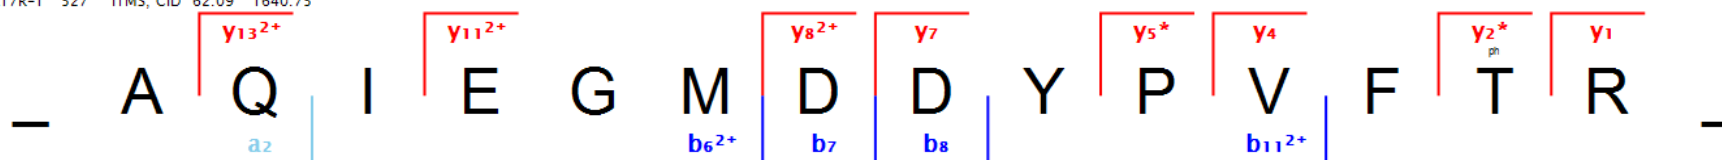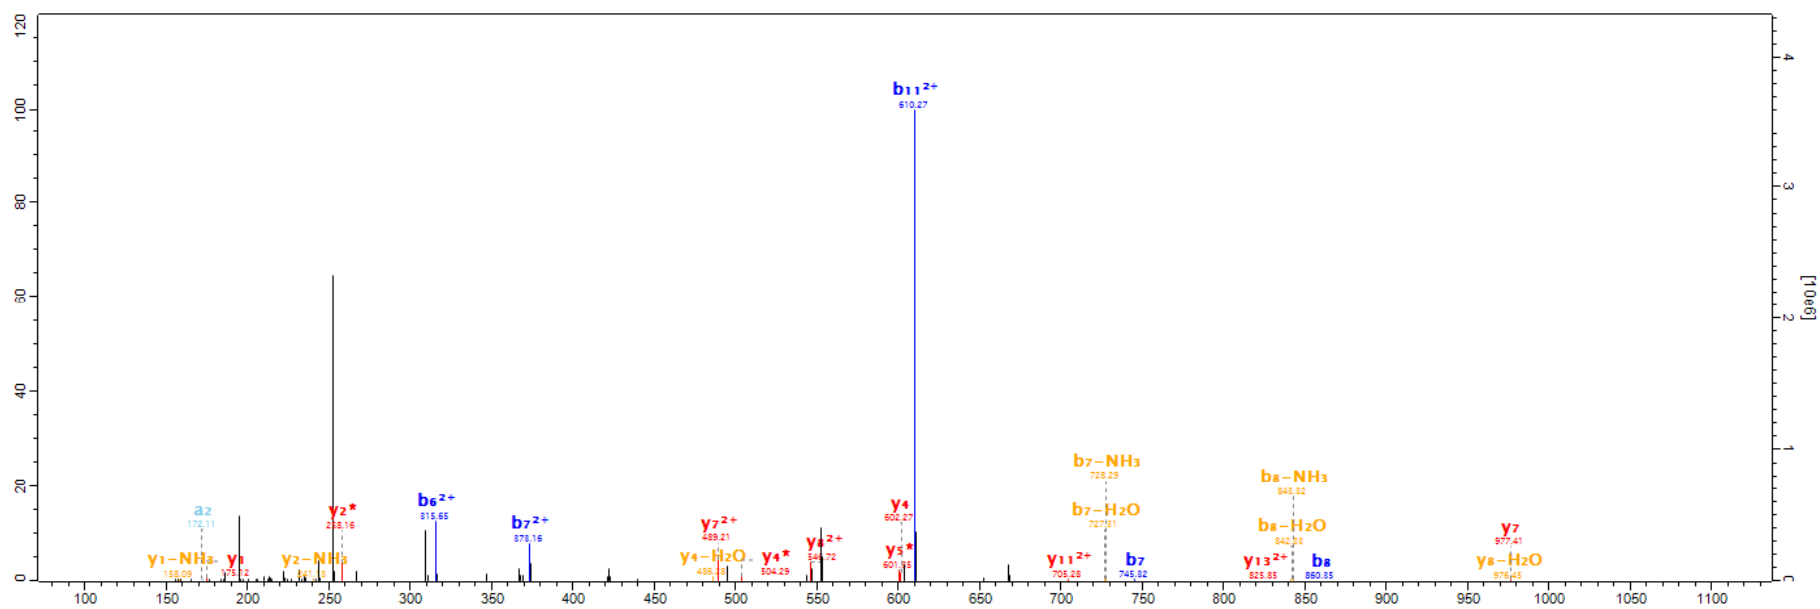

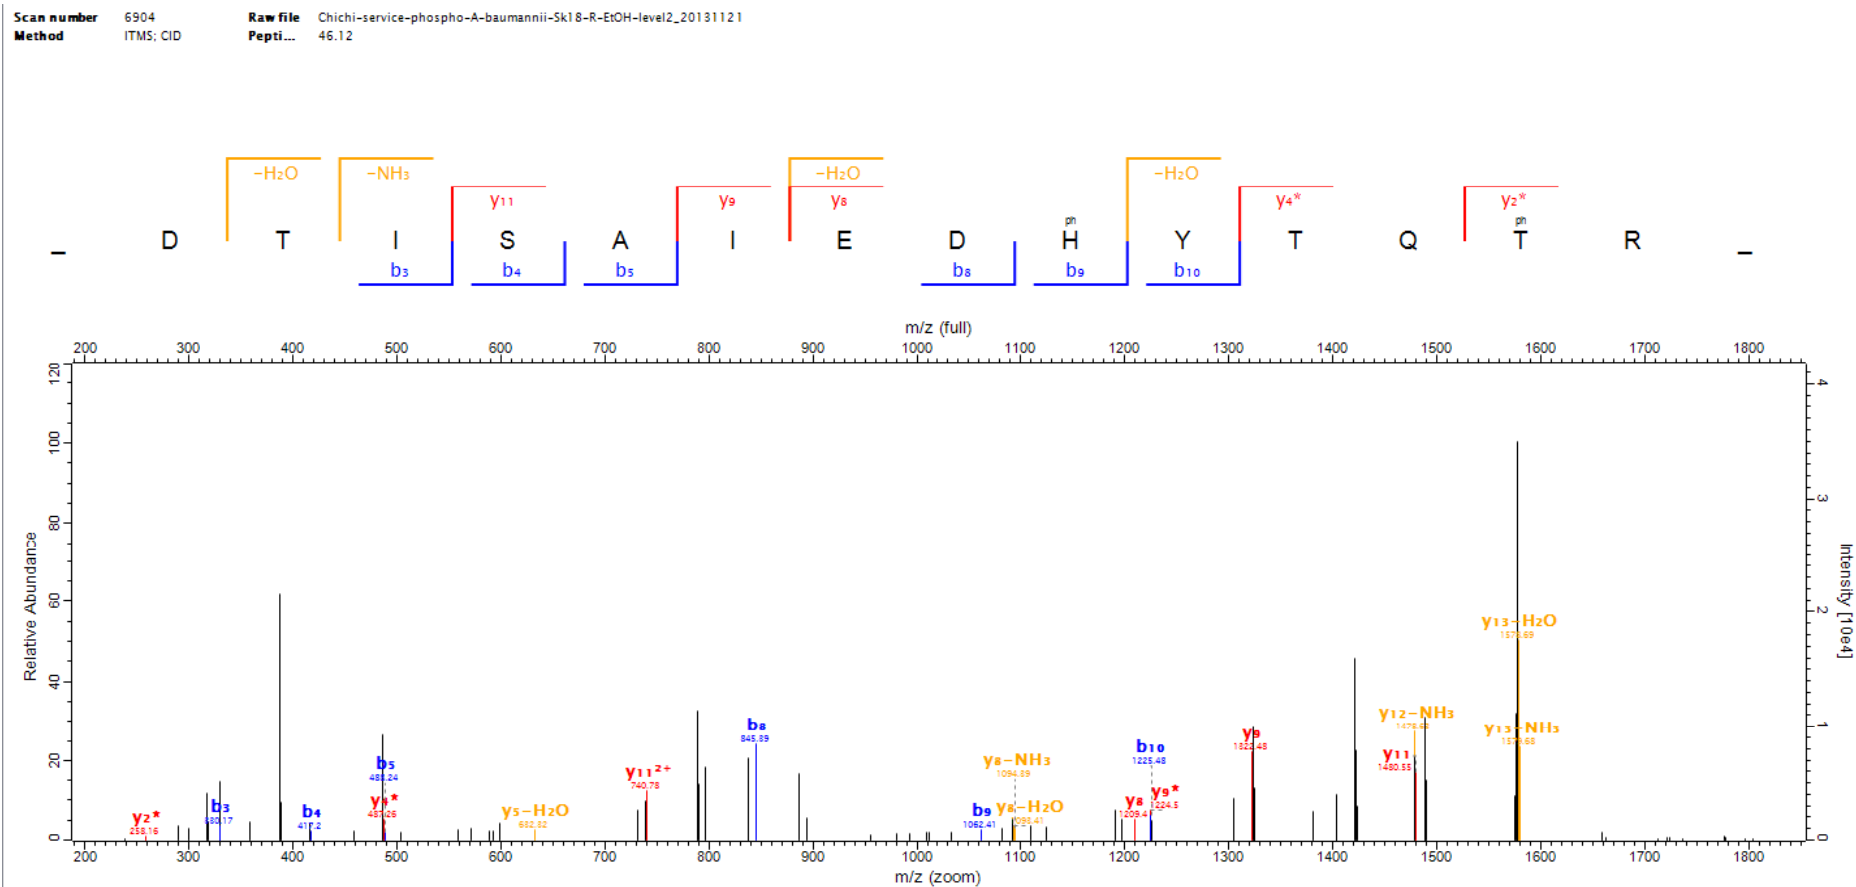



Scan number 4964 Rawfile 17R-7  
 Method ITMS; CID Pepti... 35.99

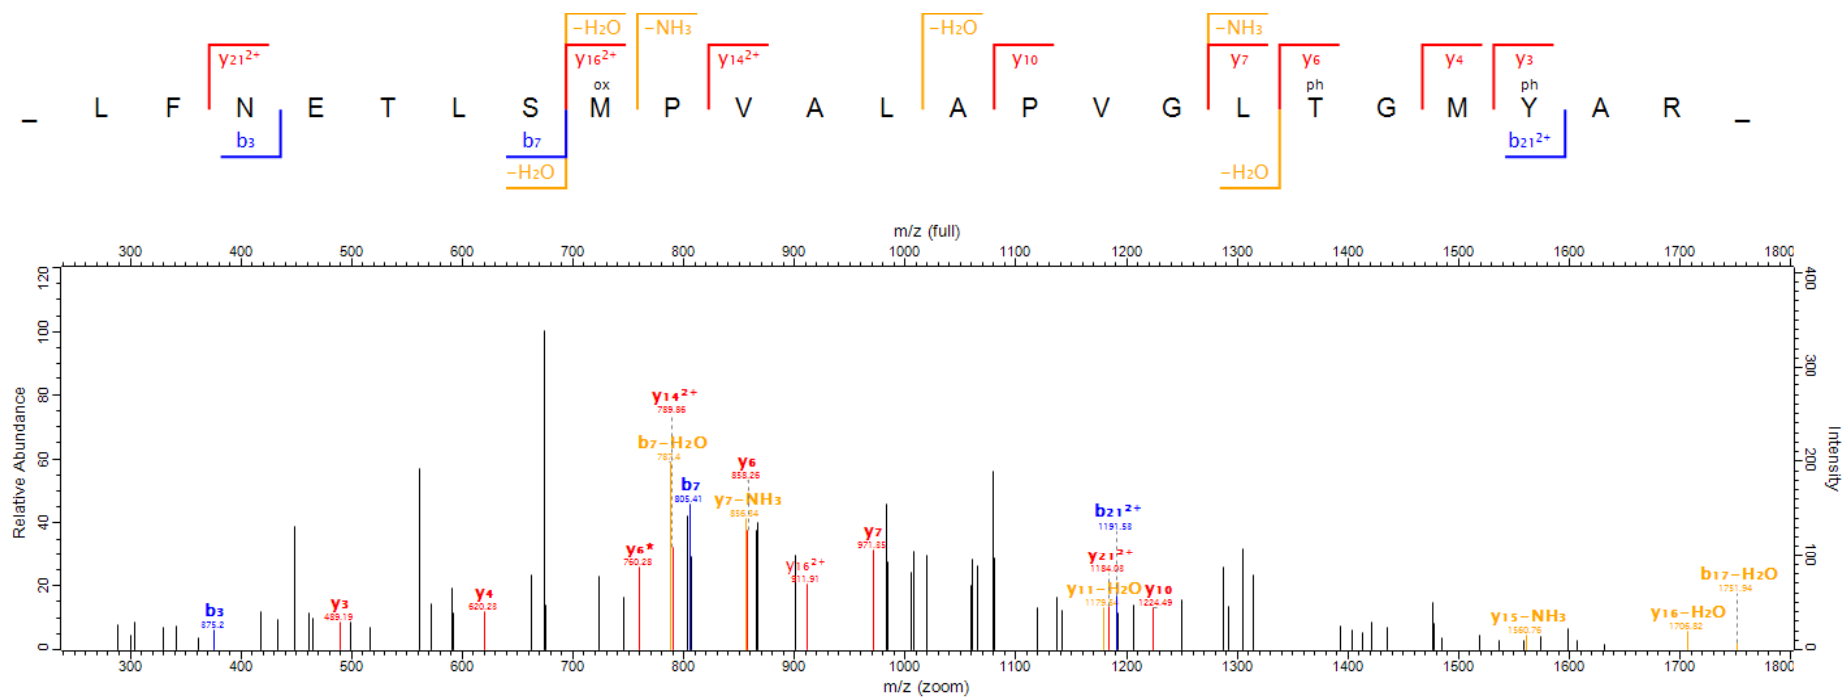

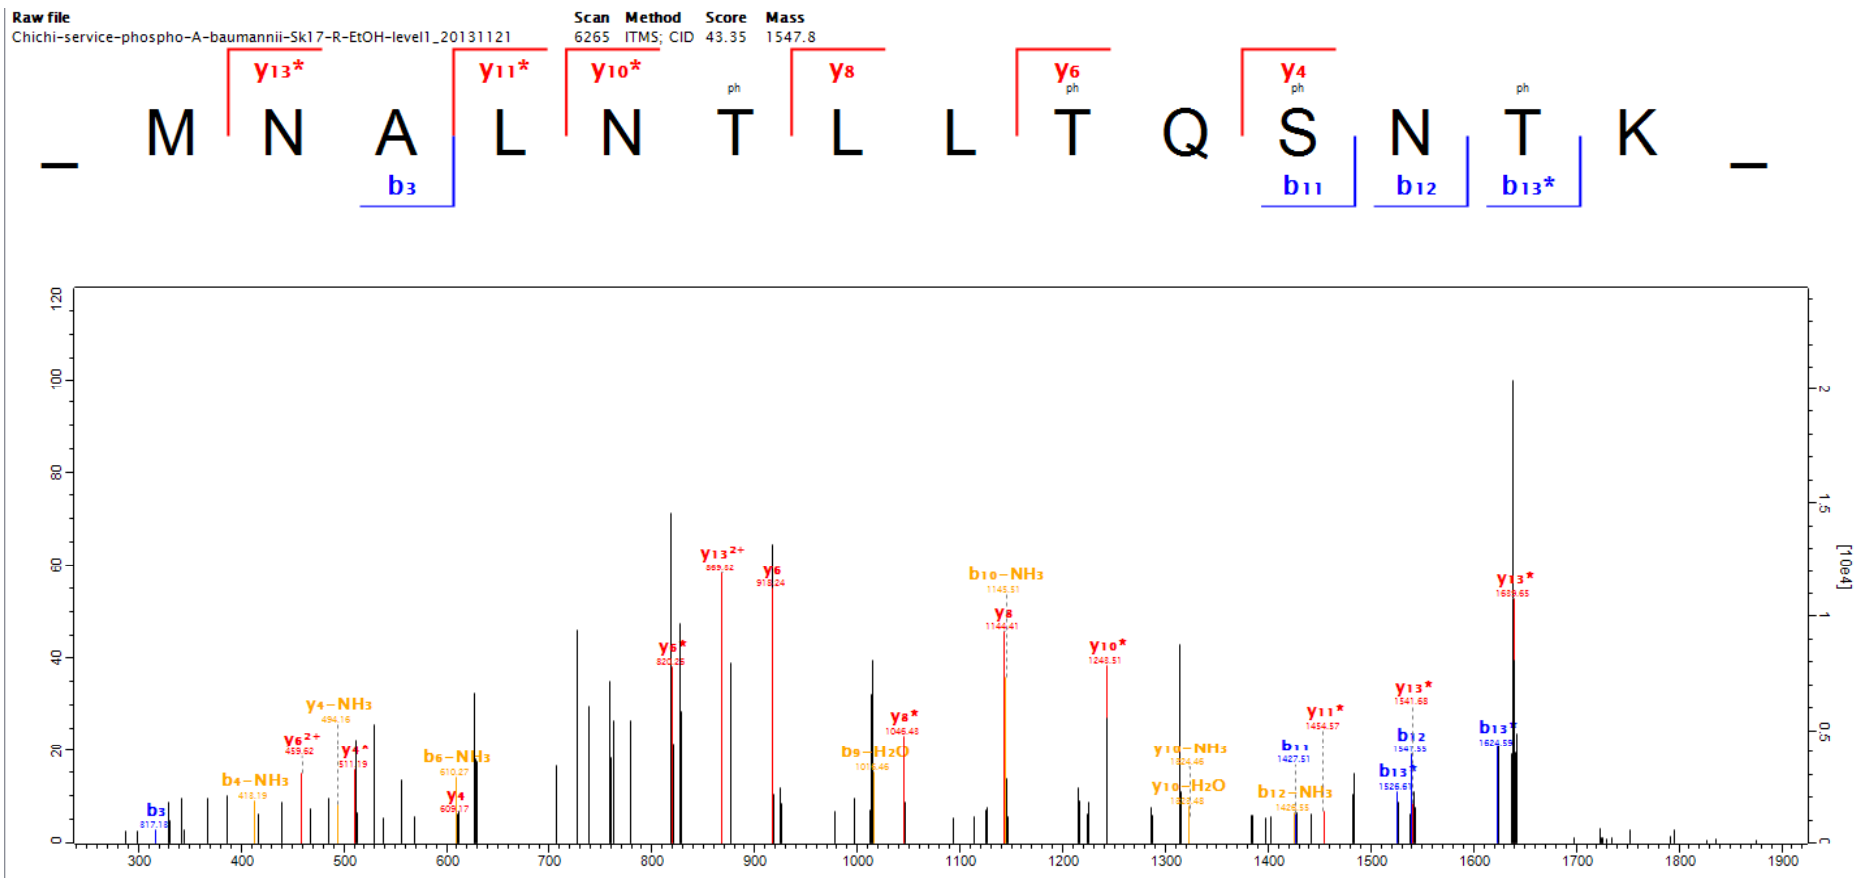

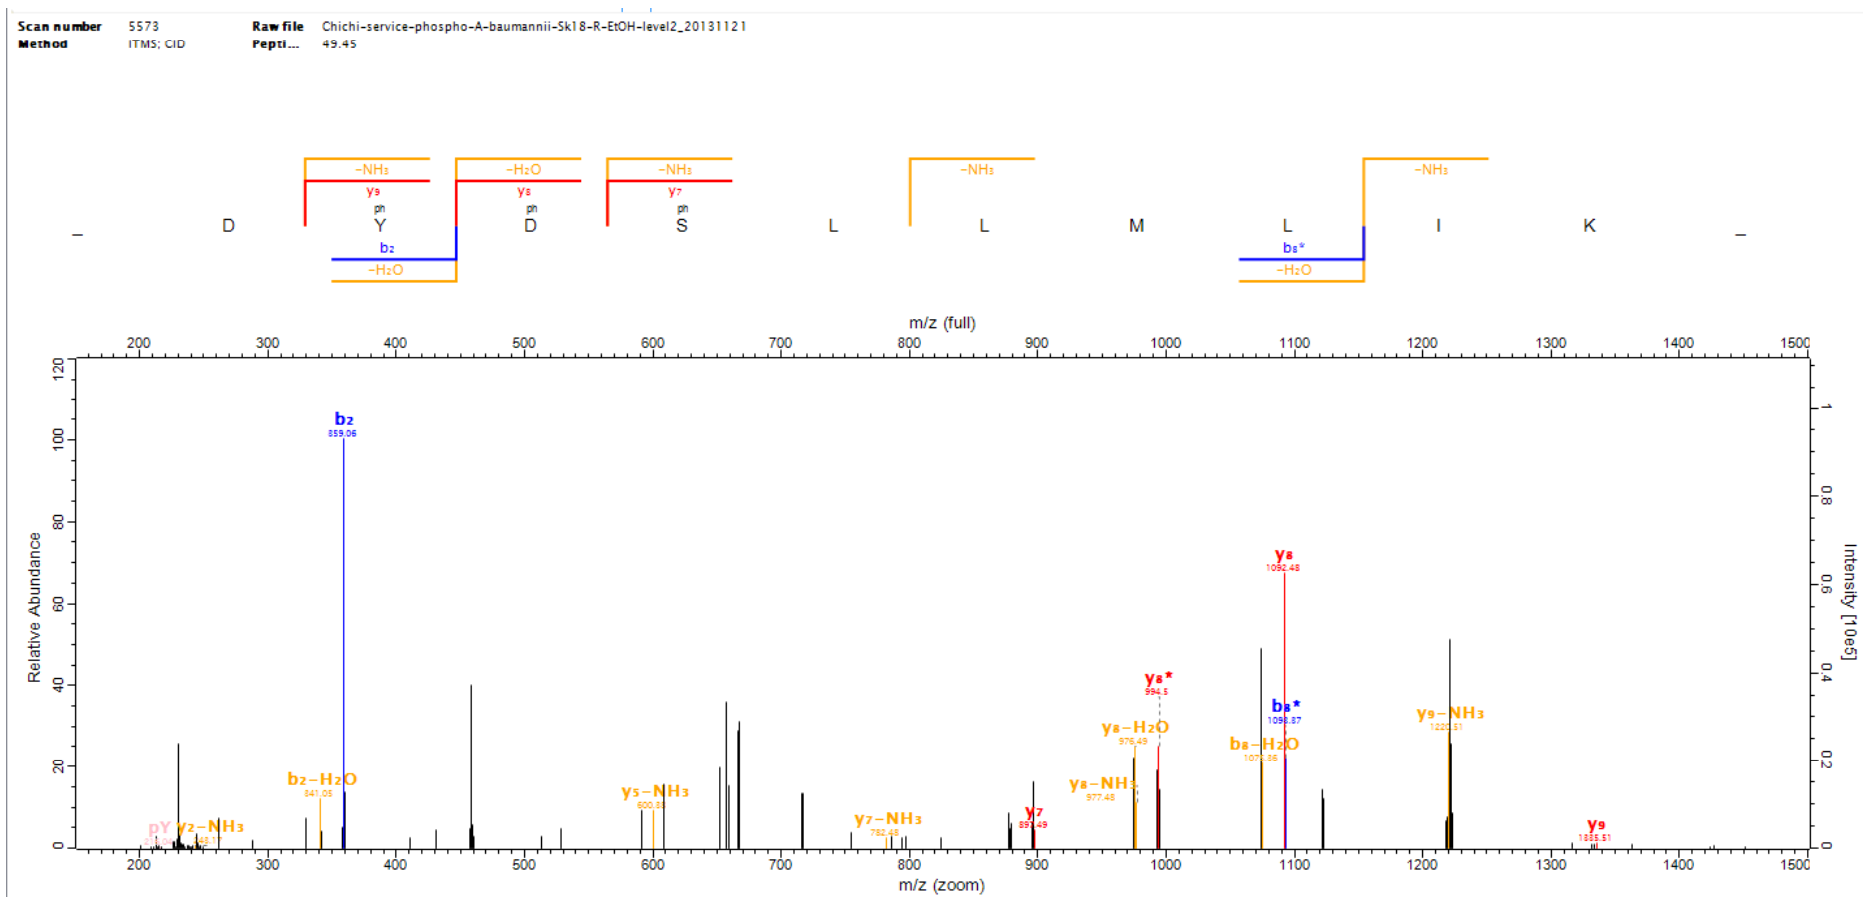

Raw file  
Chichi-service-phospho-A-baumannii-Sk17-R-PBS-level2\_20131121

Scan 7266 Method ITMS; CID Score 40.98 Mass 1515.72

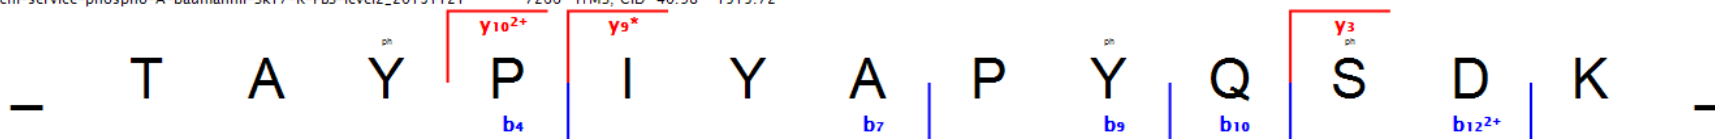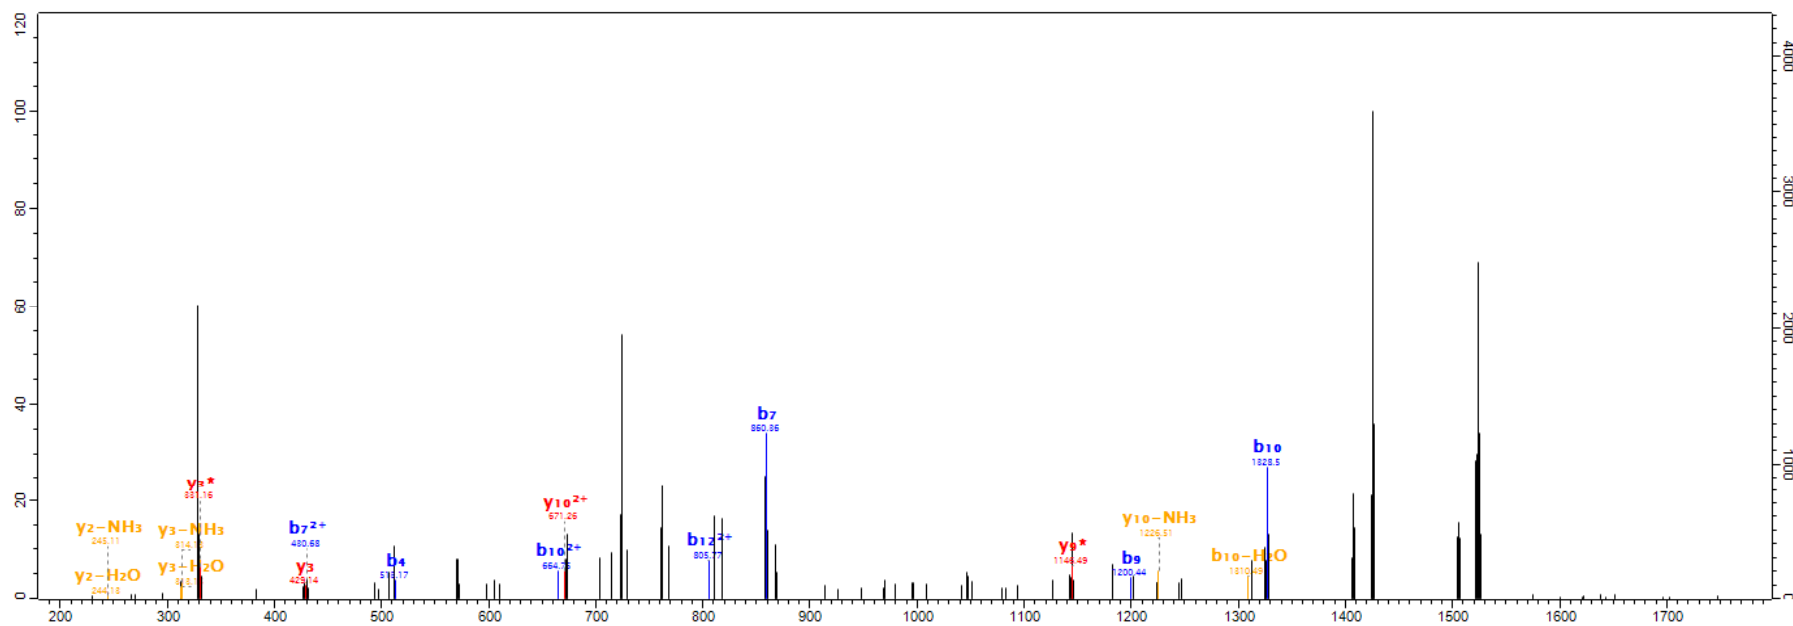

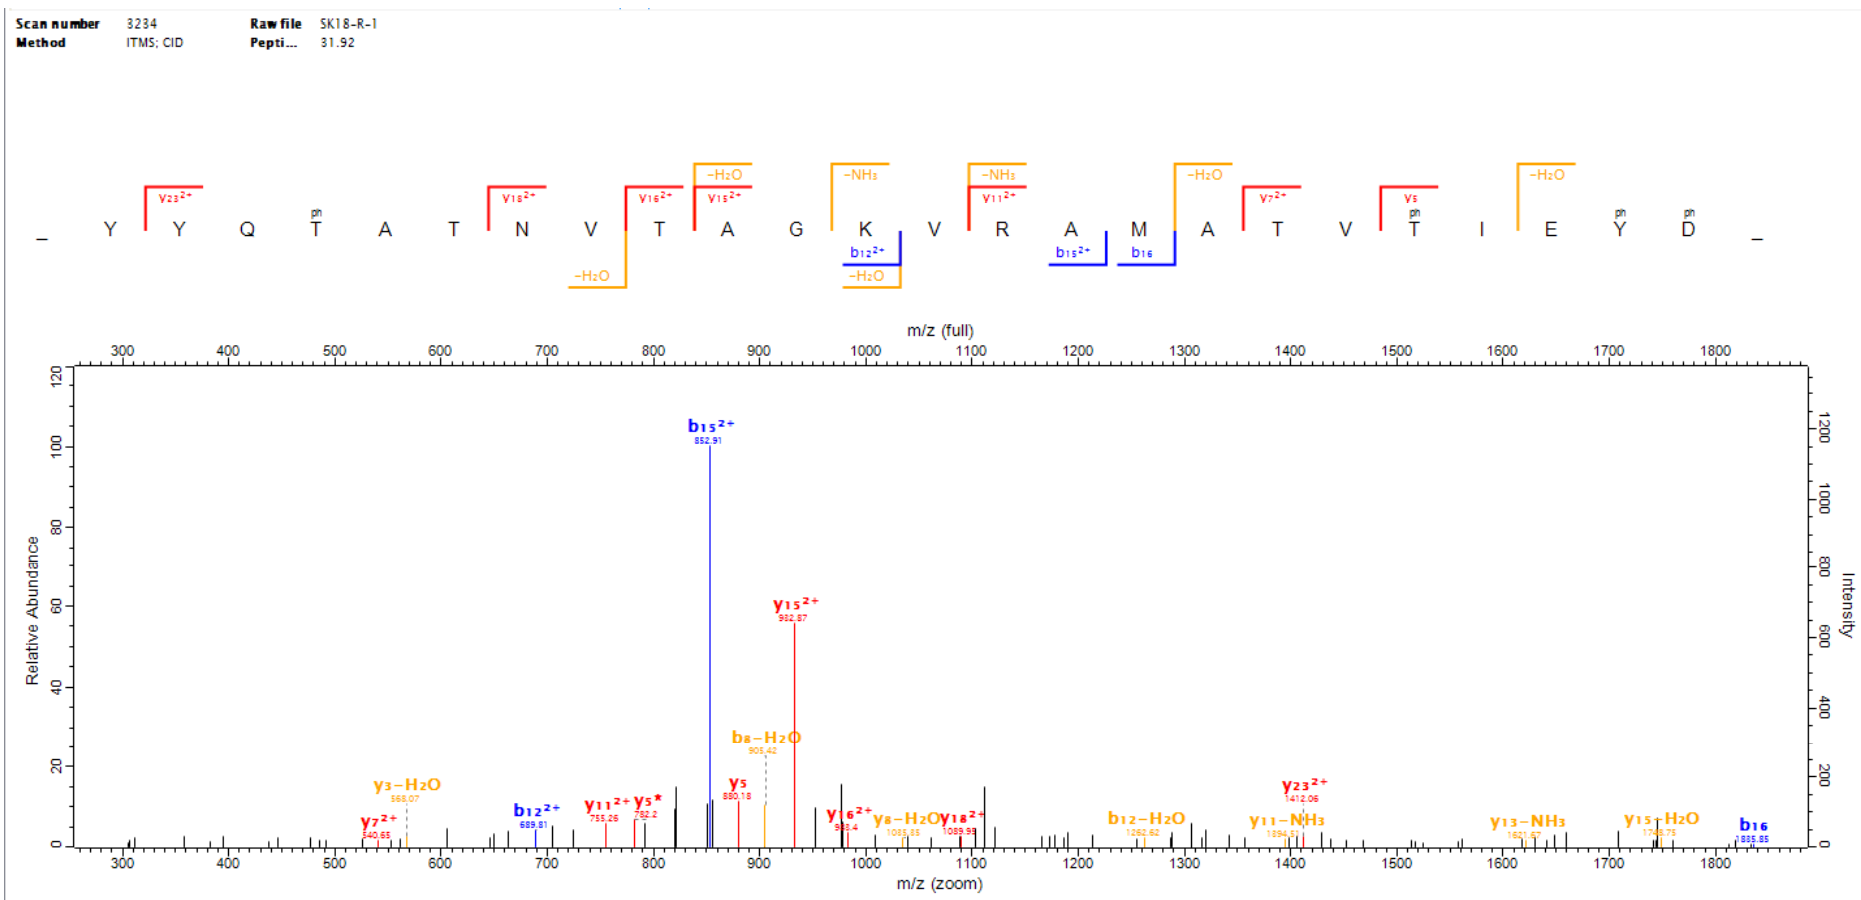

77

Raw file 20120604R2P01 Scan Method 3539 ITMS; CID Score 71.22 Mass 1337.67

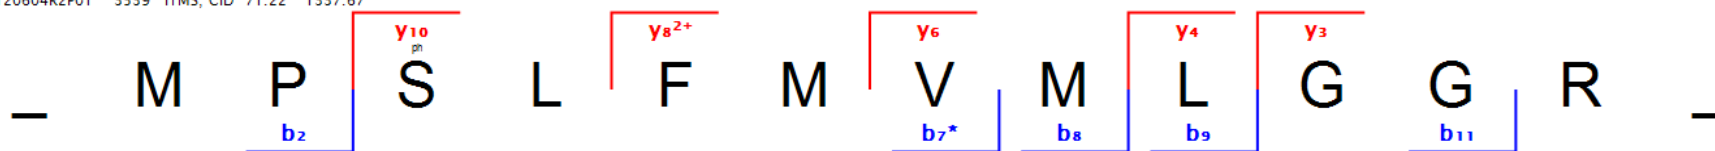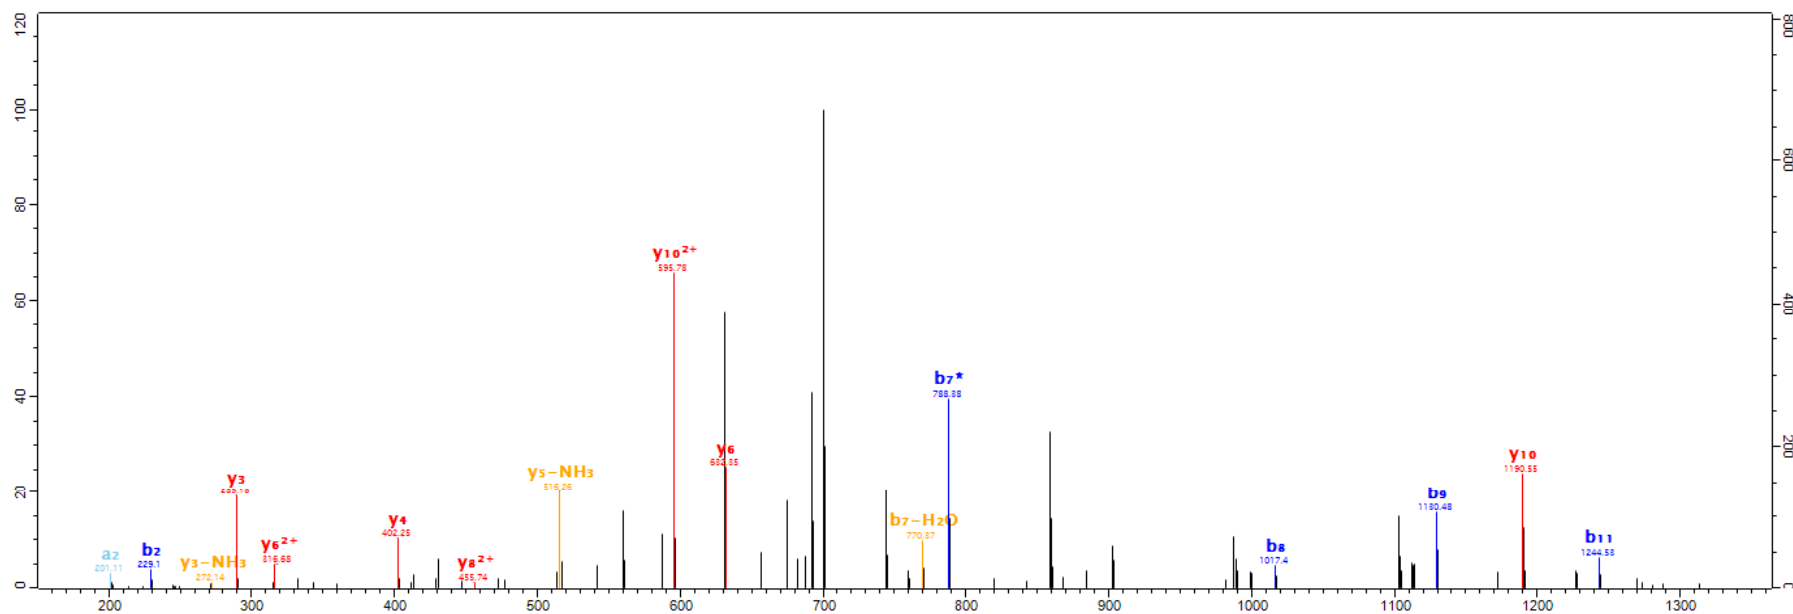

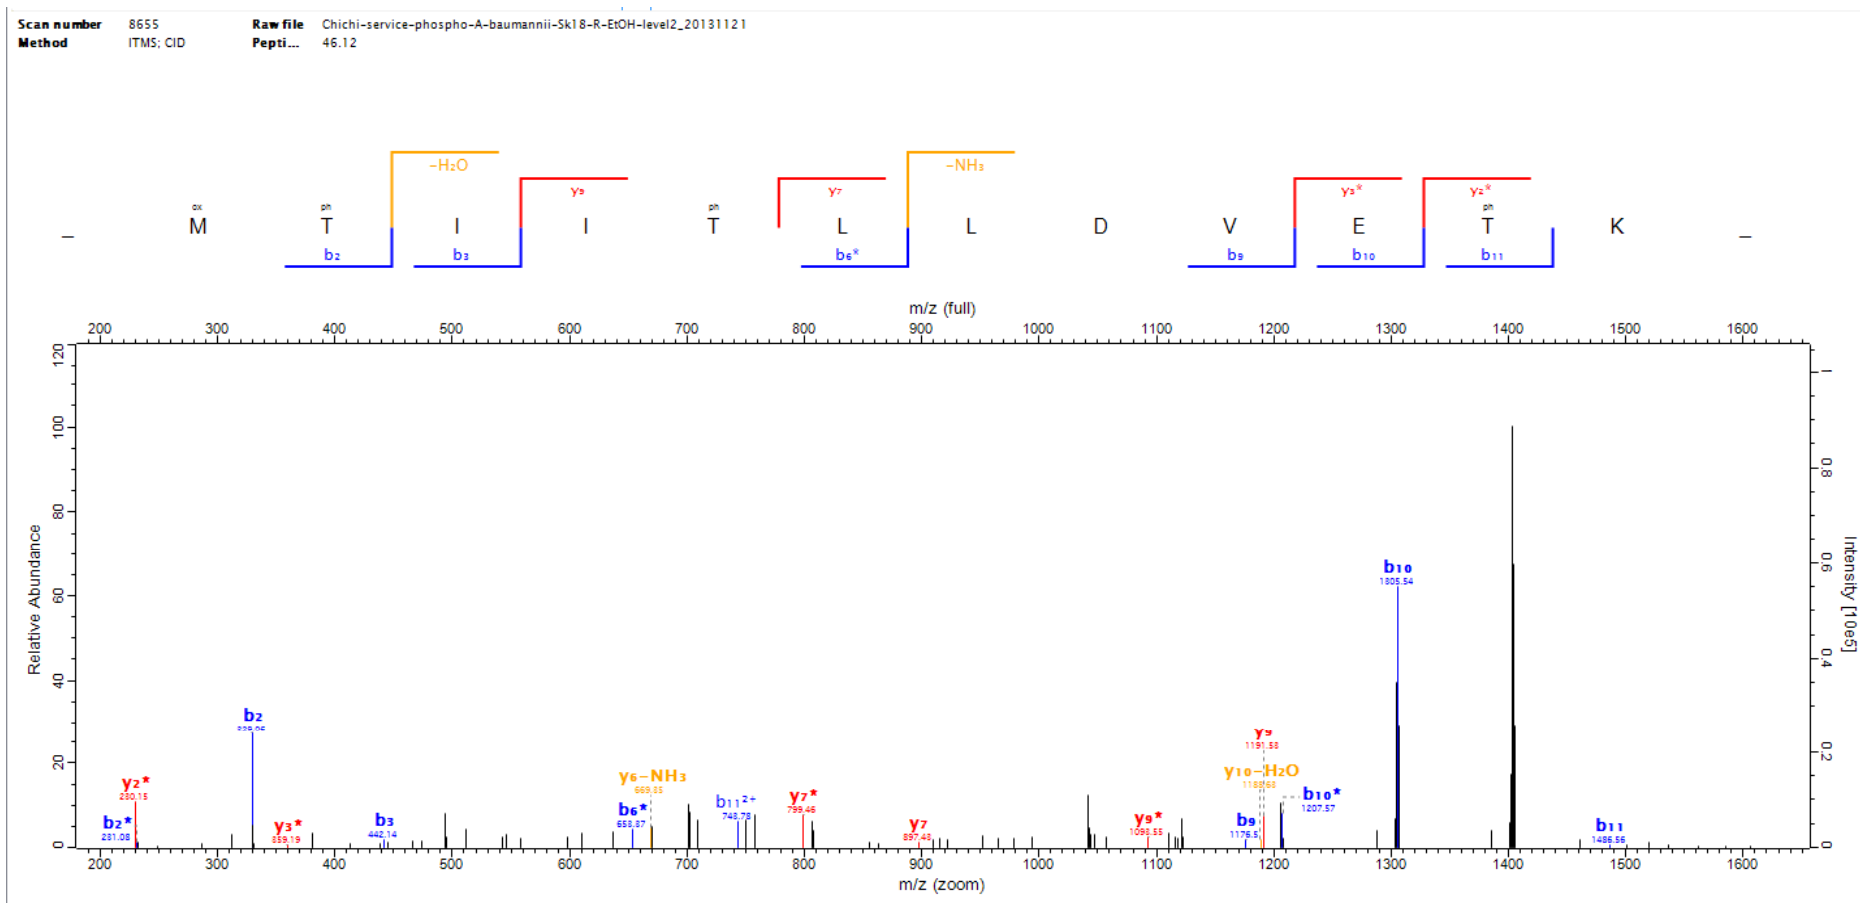

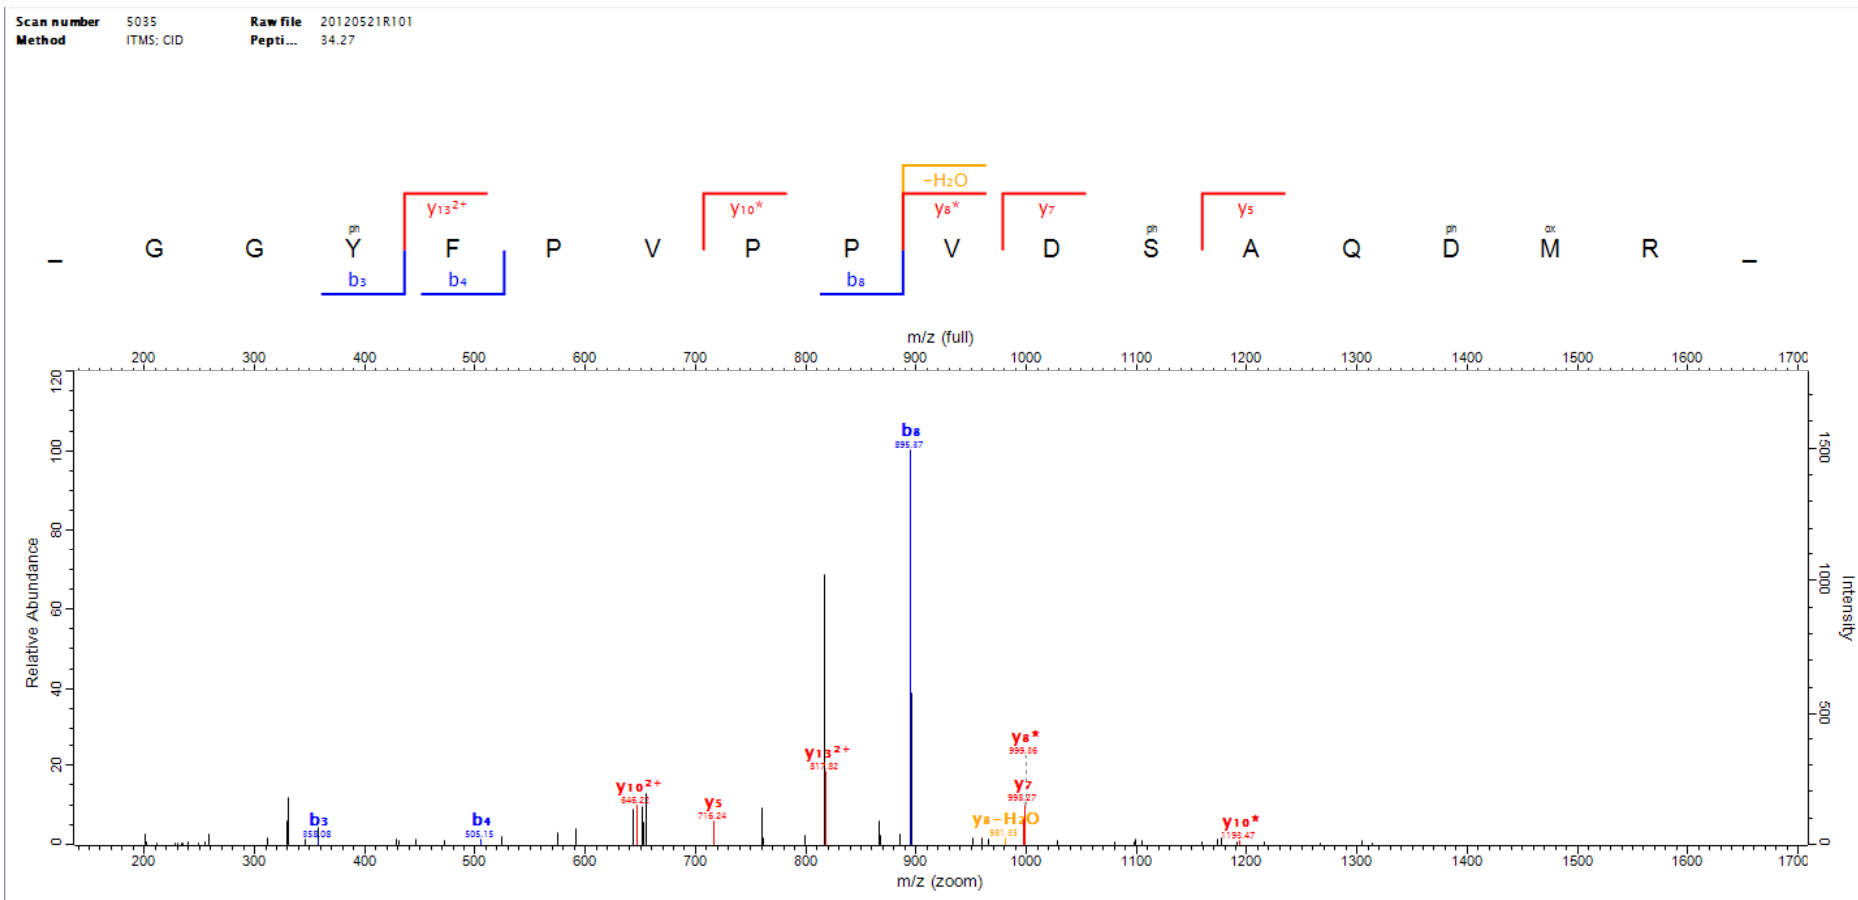



Scan number 7852 Raw file Chichi-service-phospho-A-baumannii-Sk18-R-EtOH-level2\_20131121  
 Method ITMS: CID Pepti... 31.36

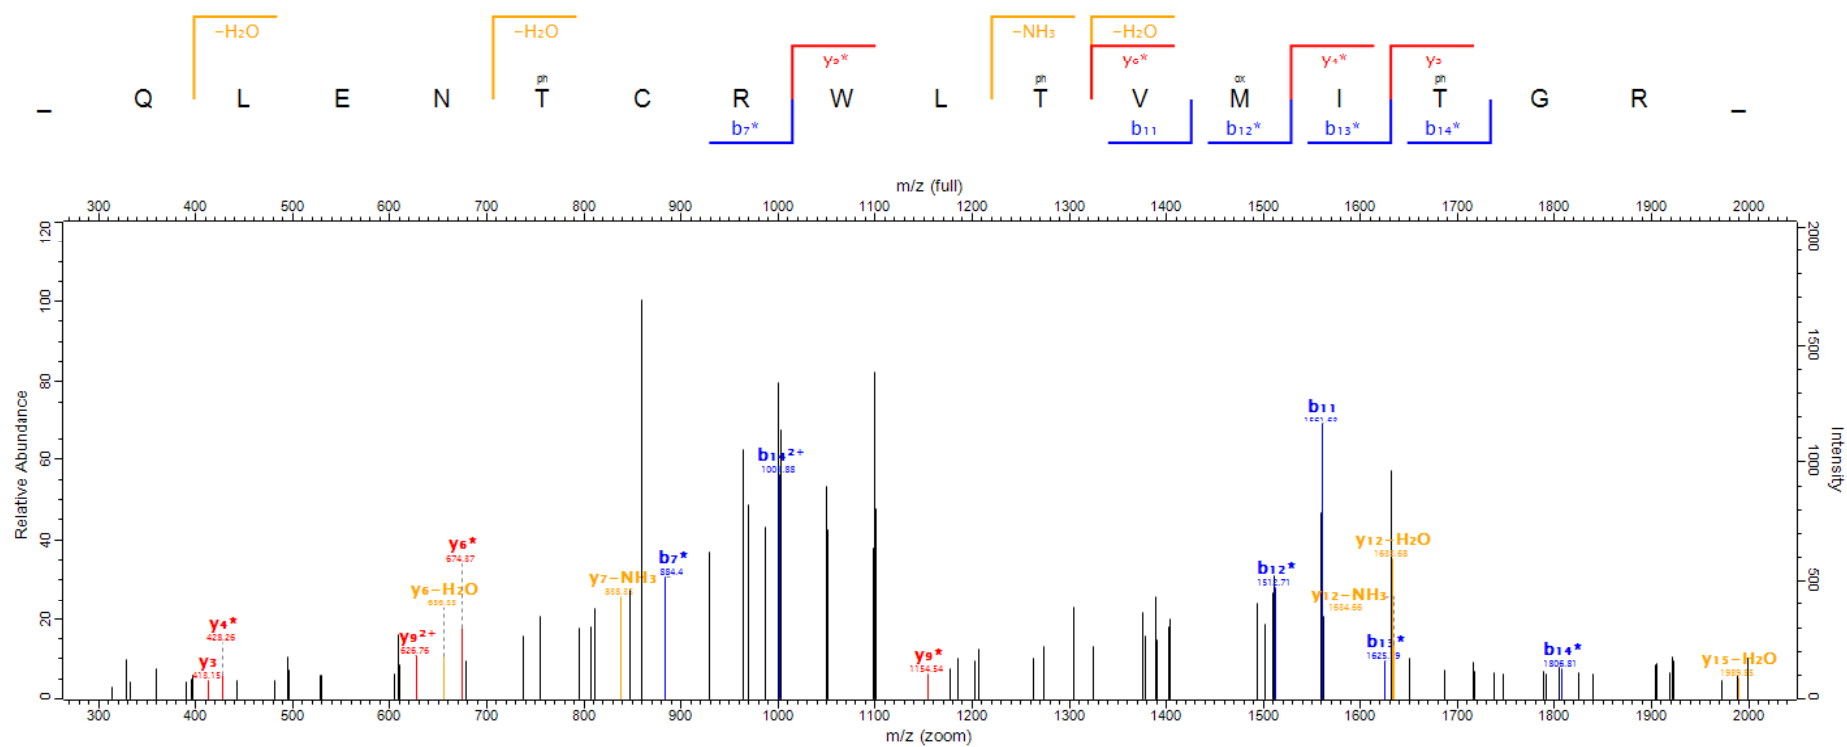

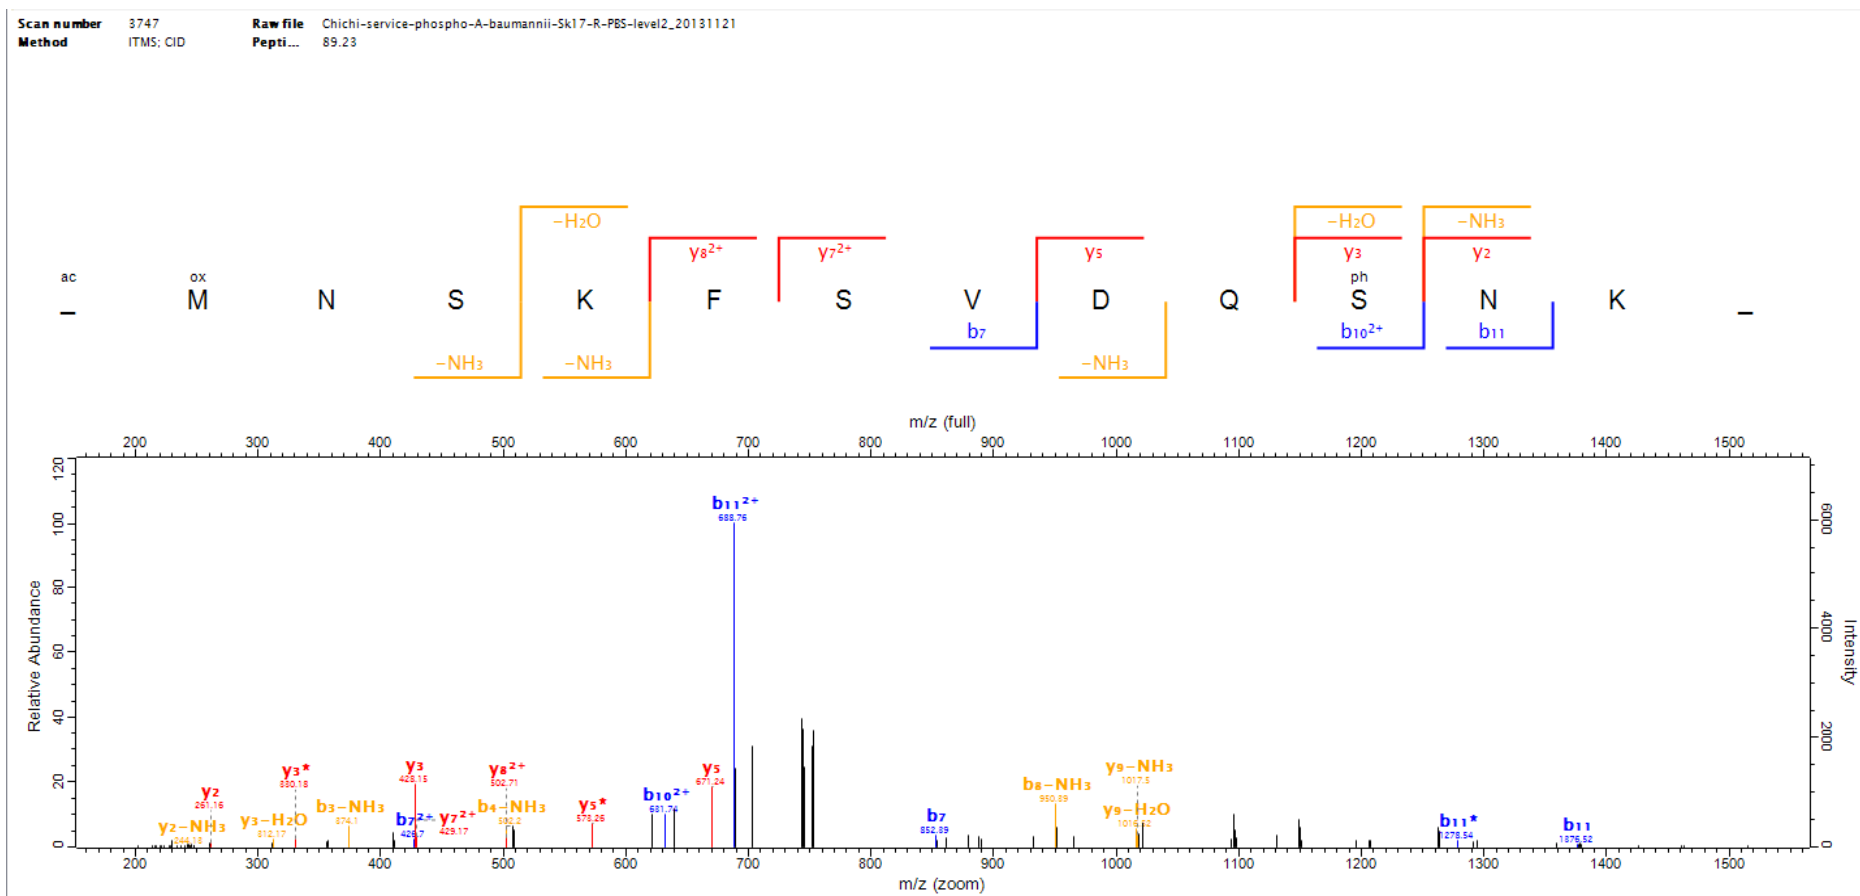

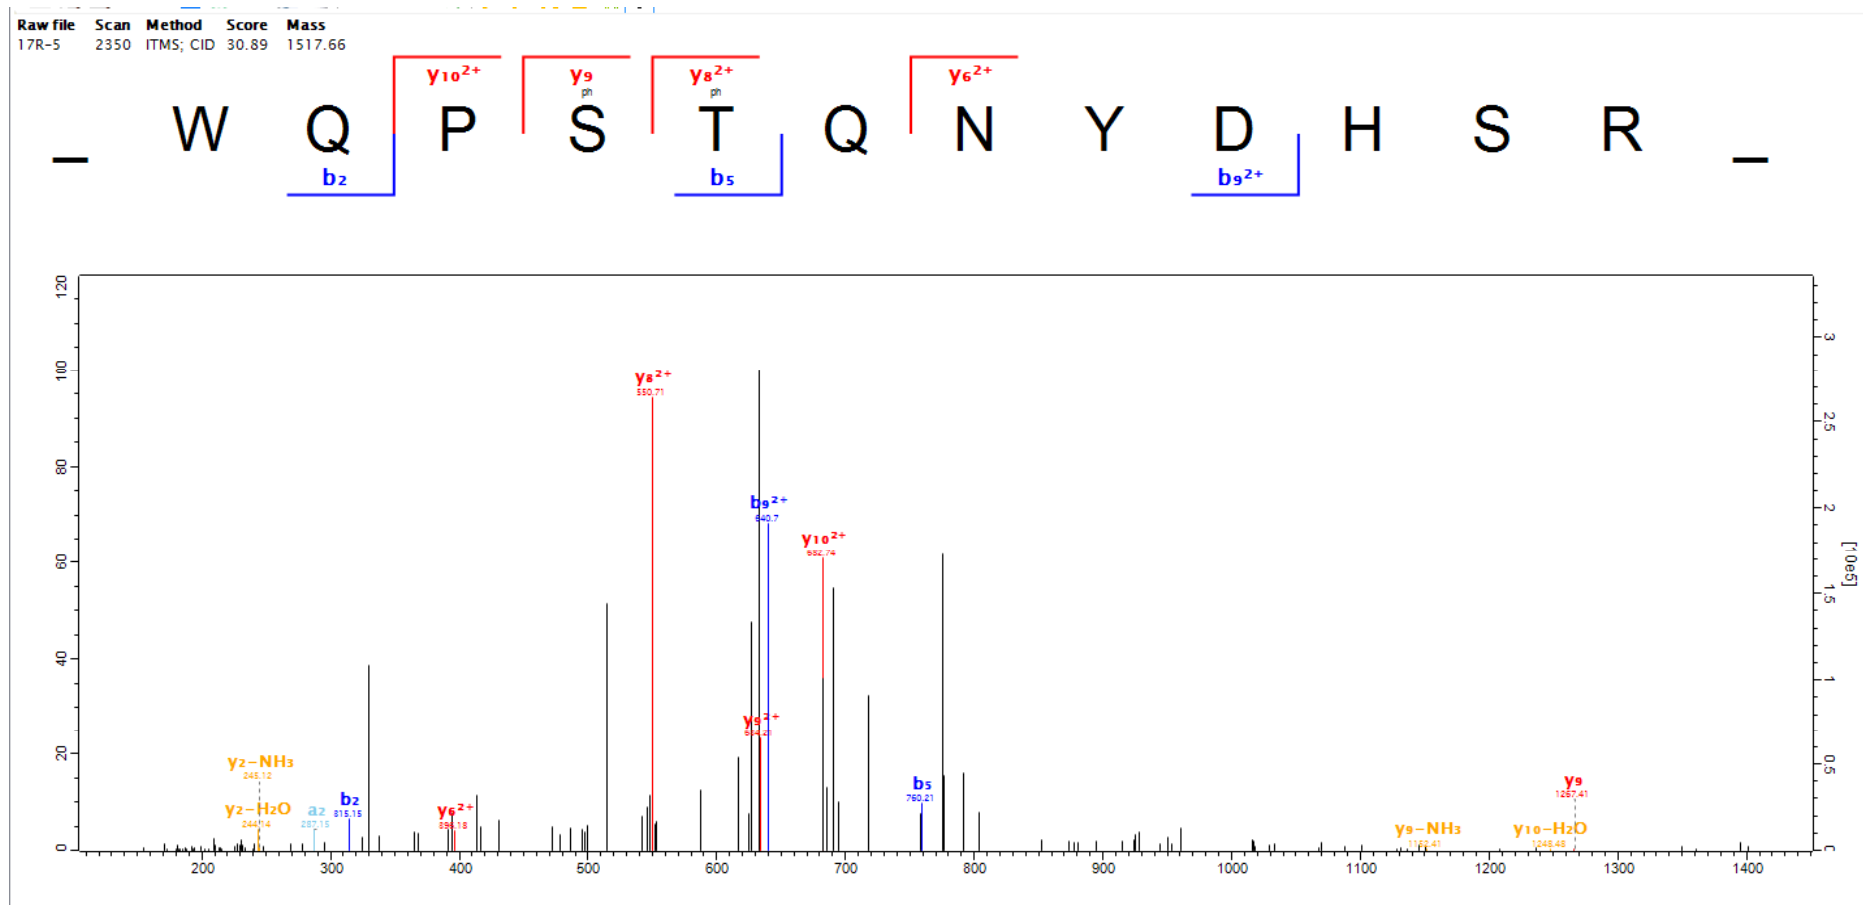

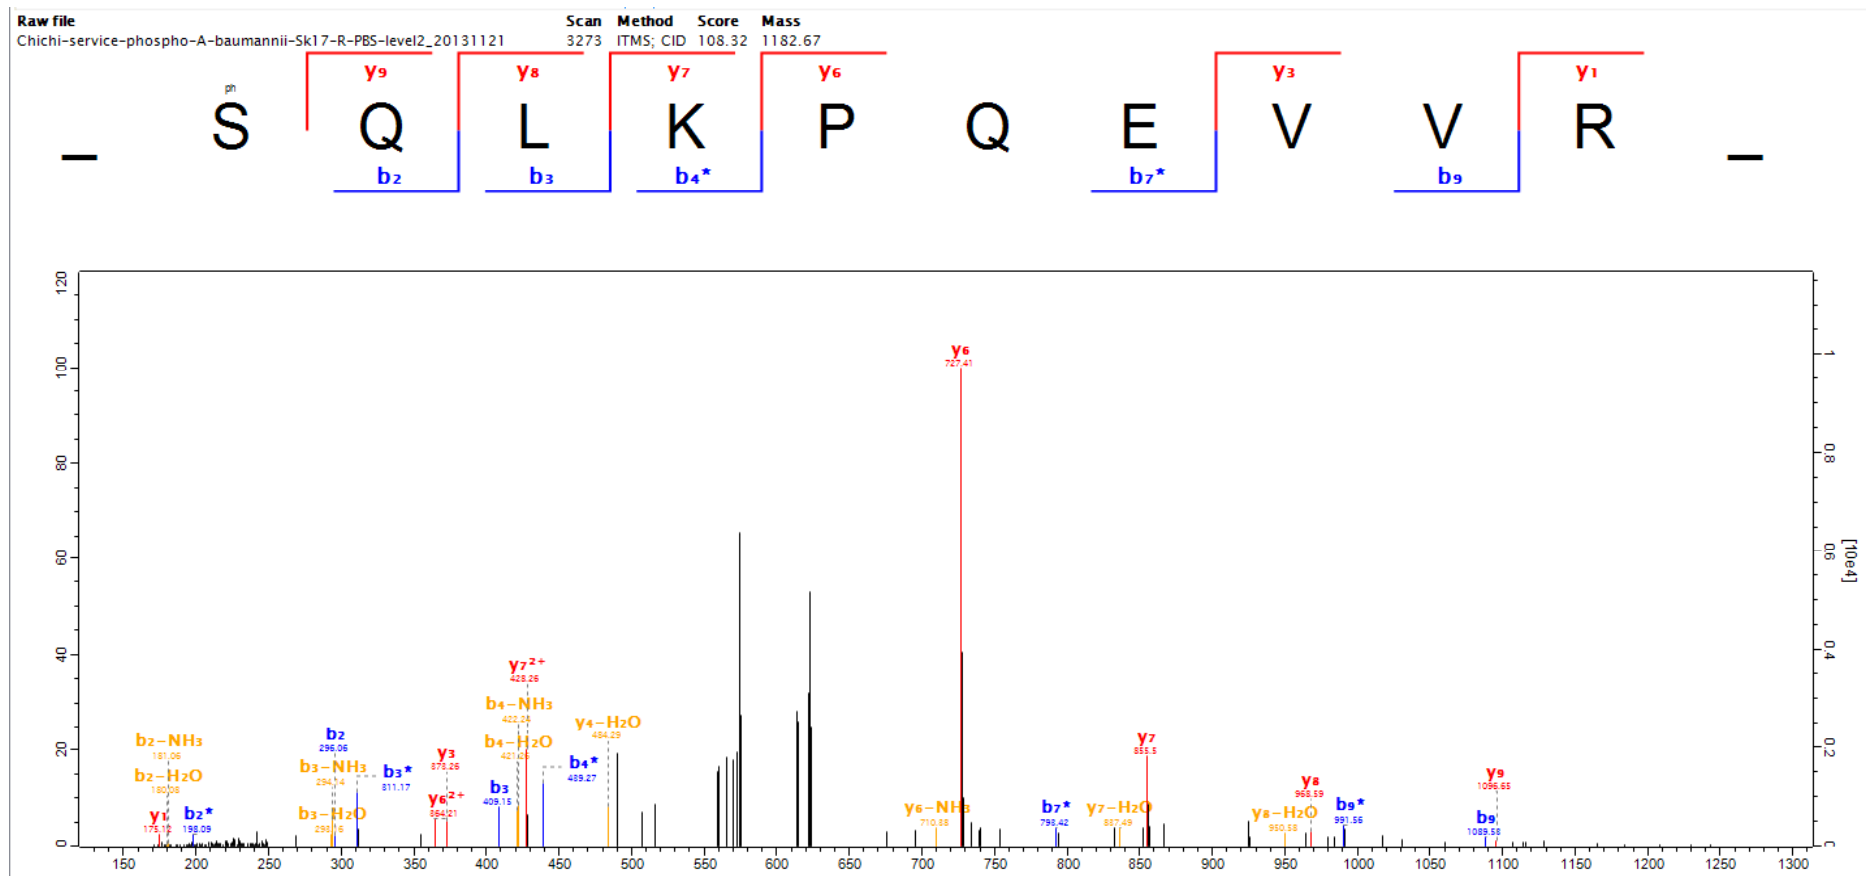

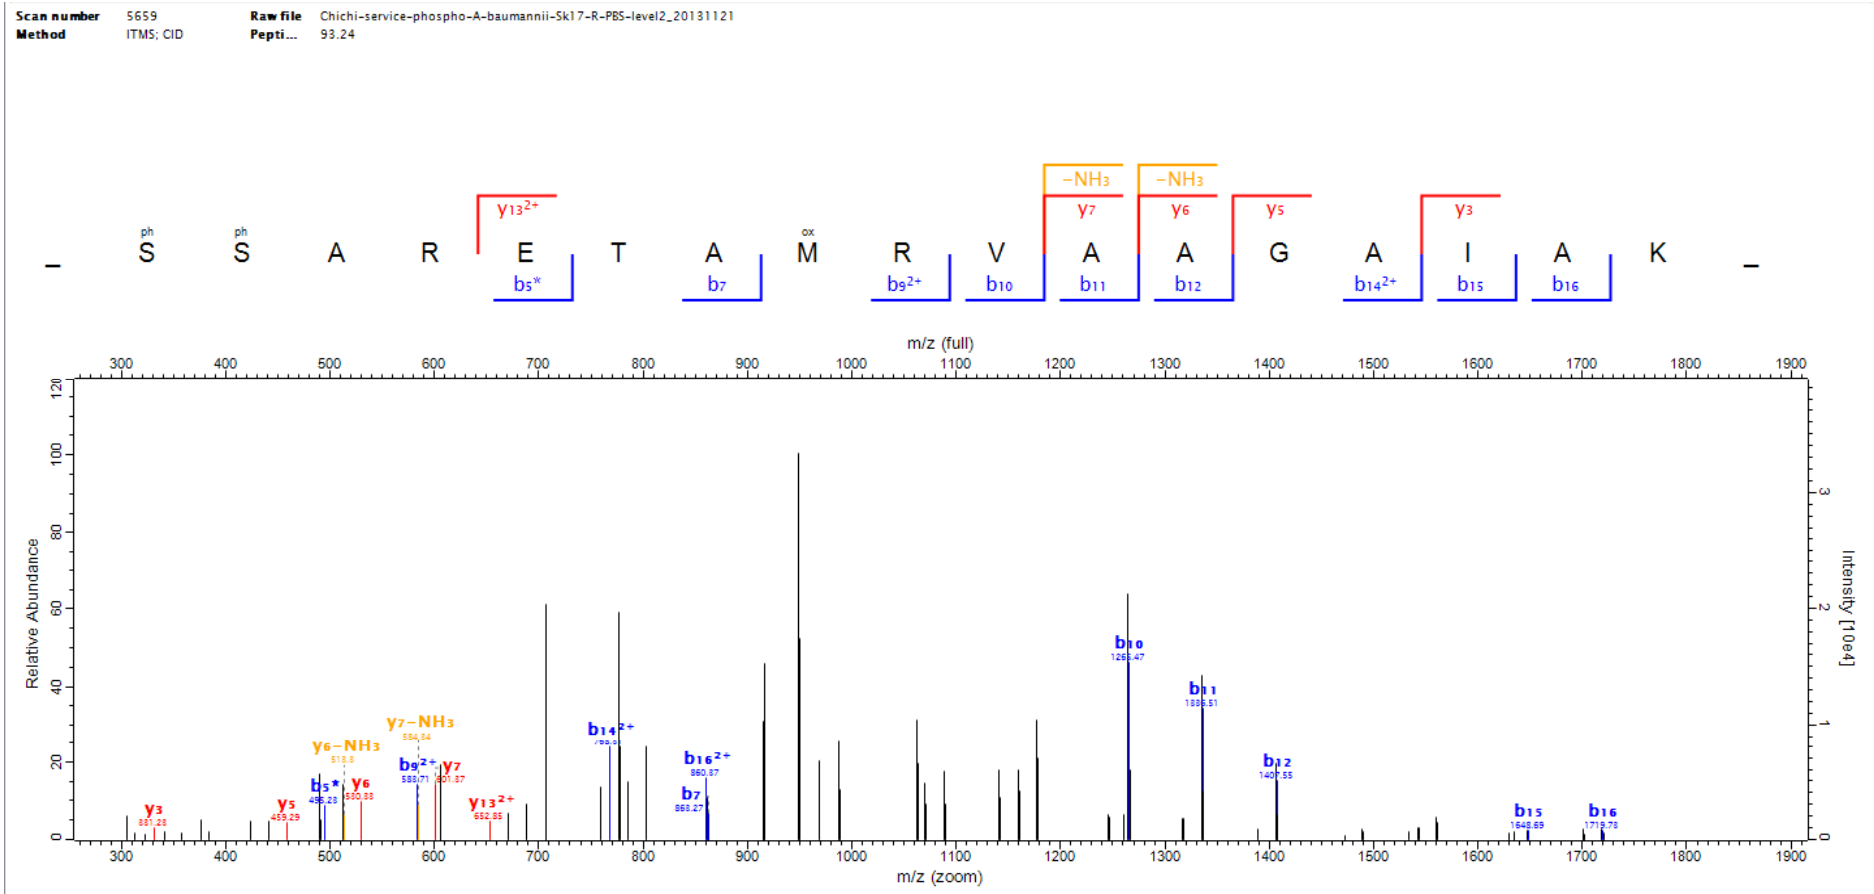

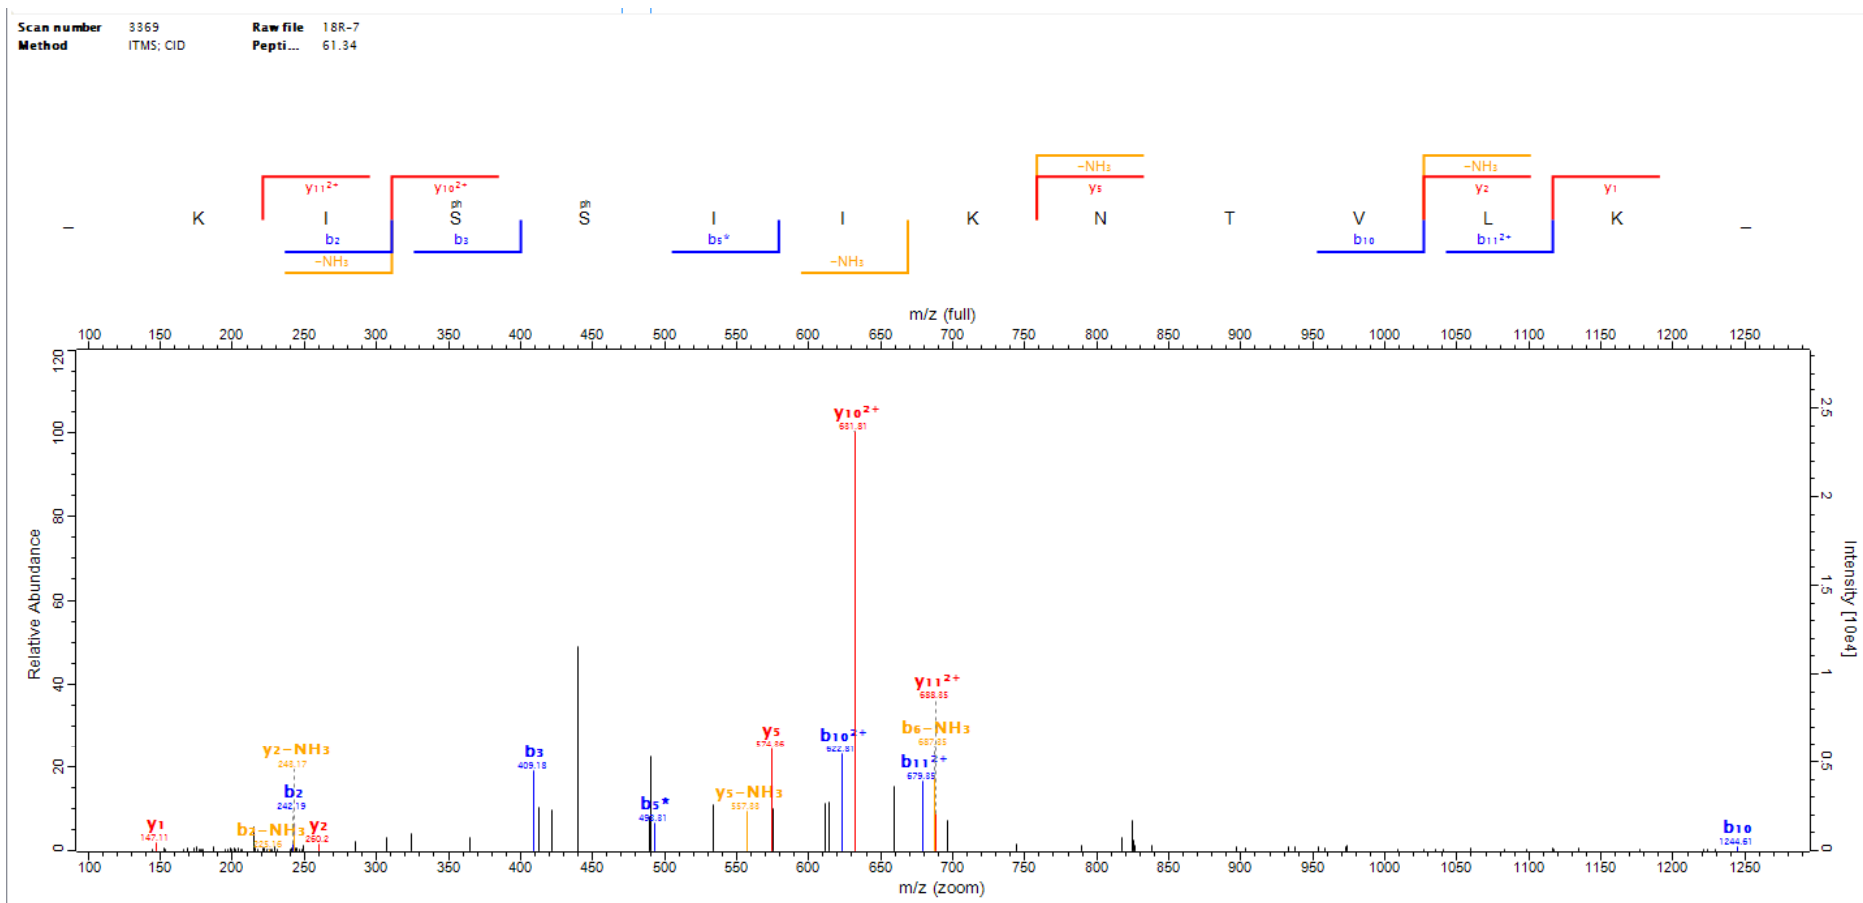

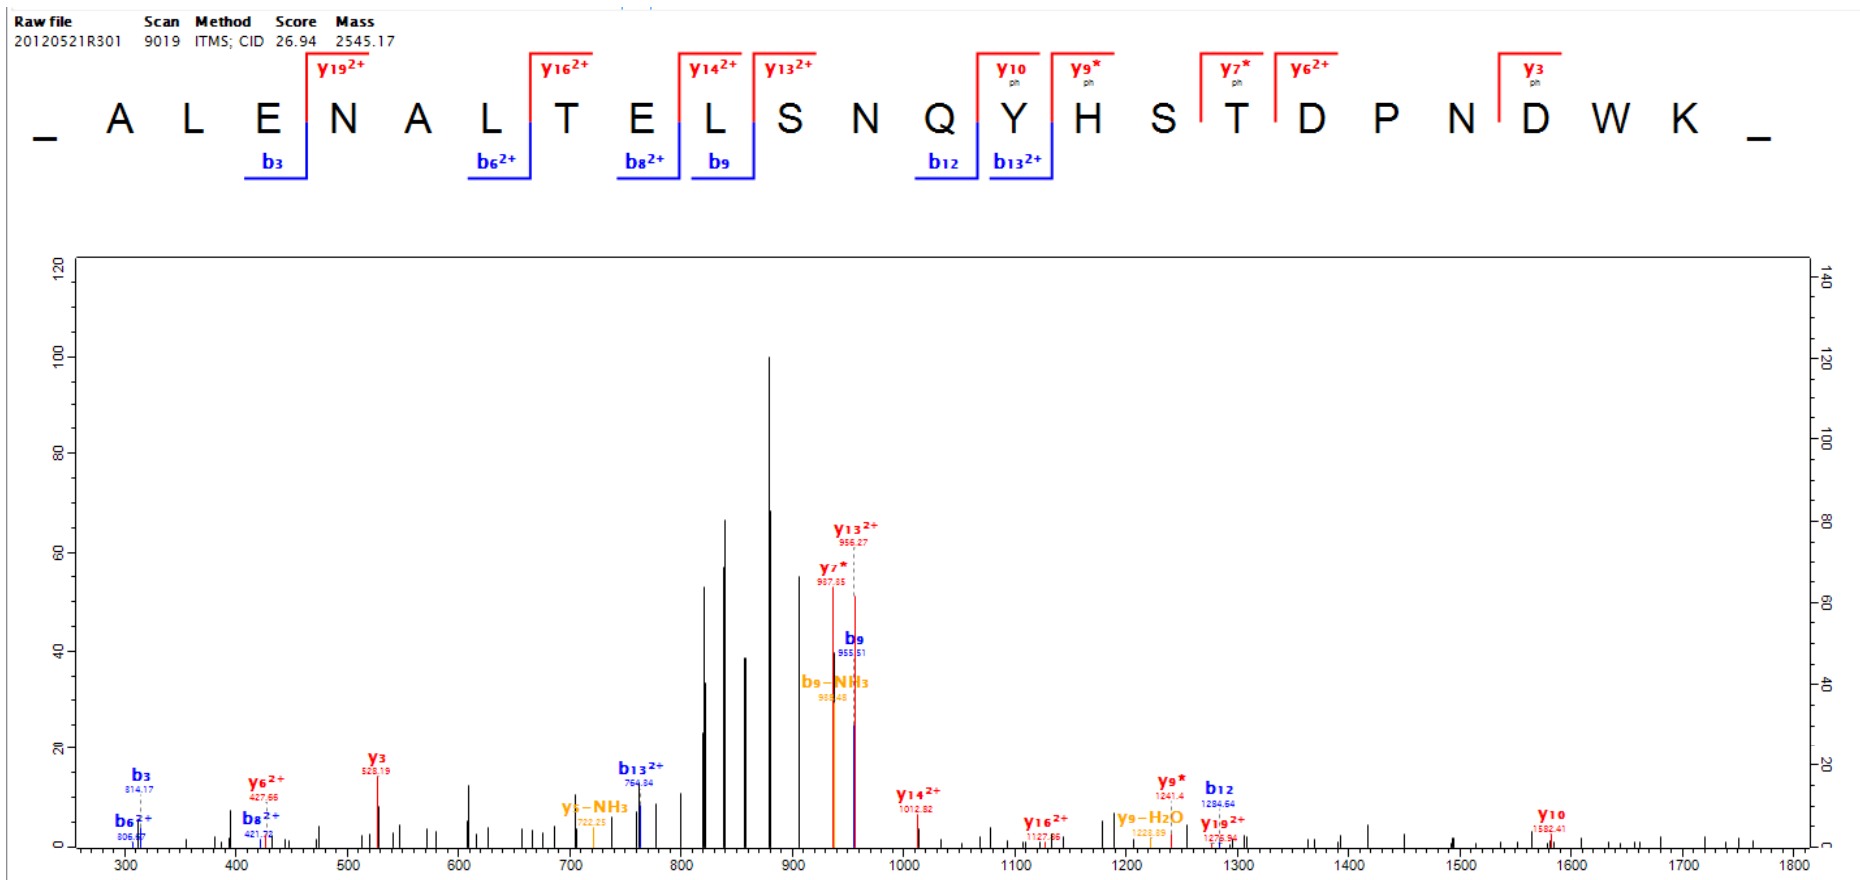

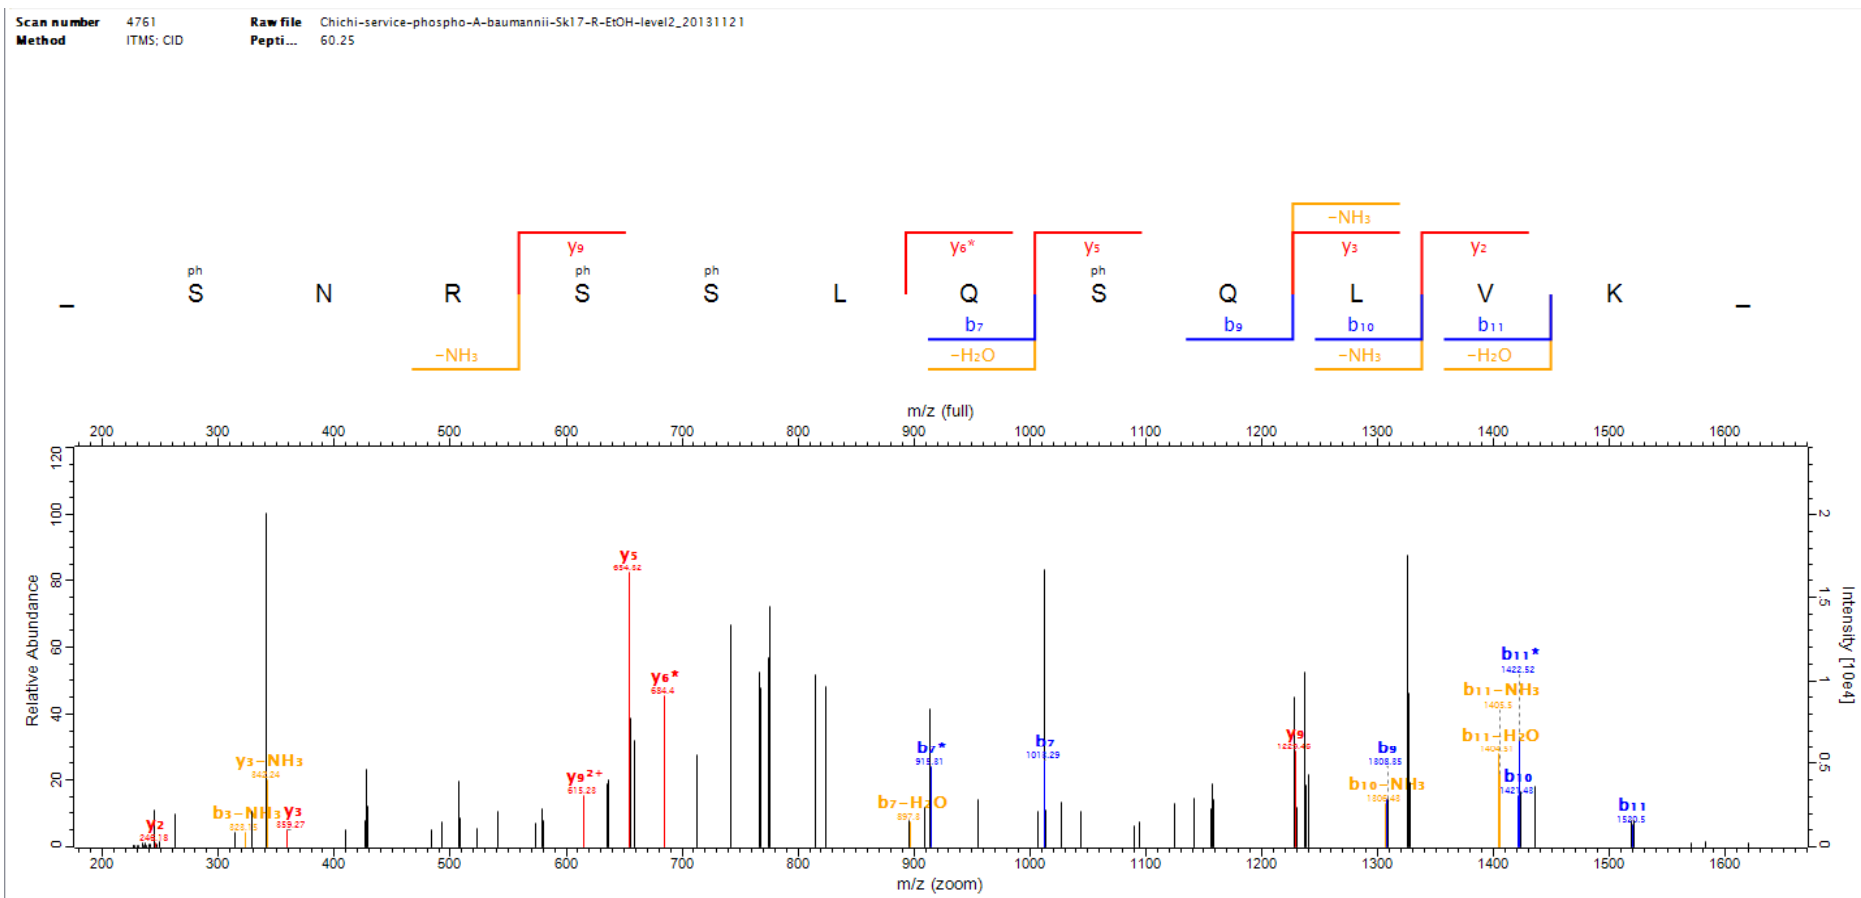



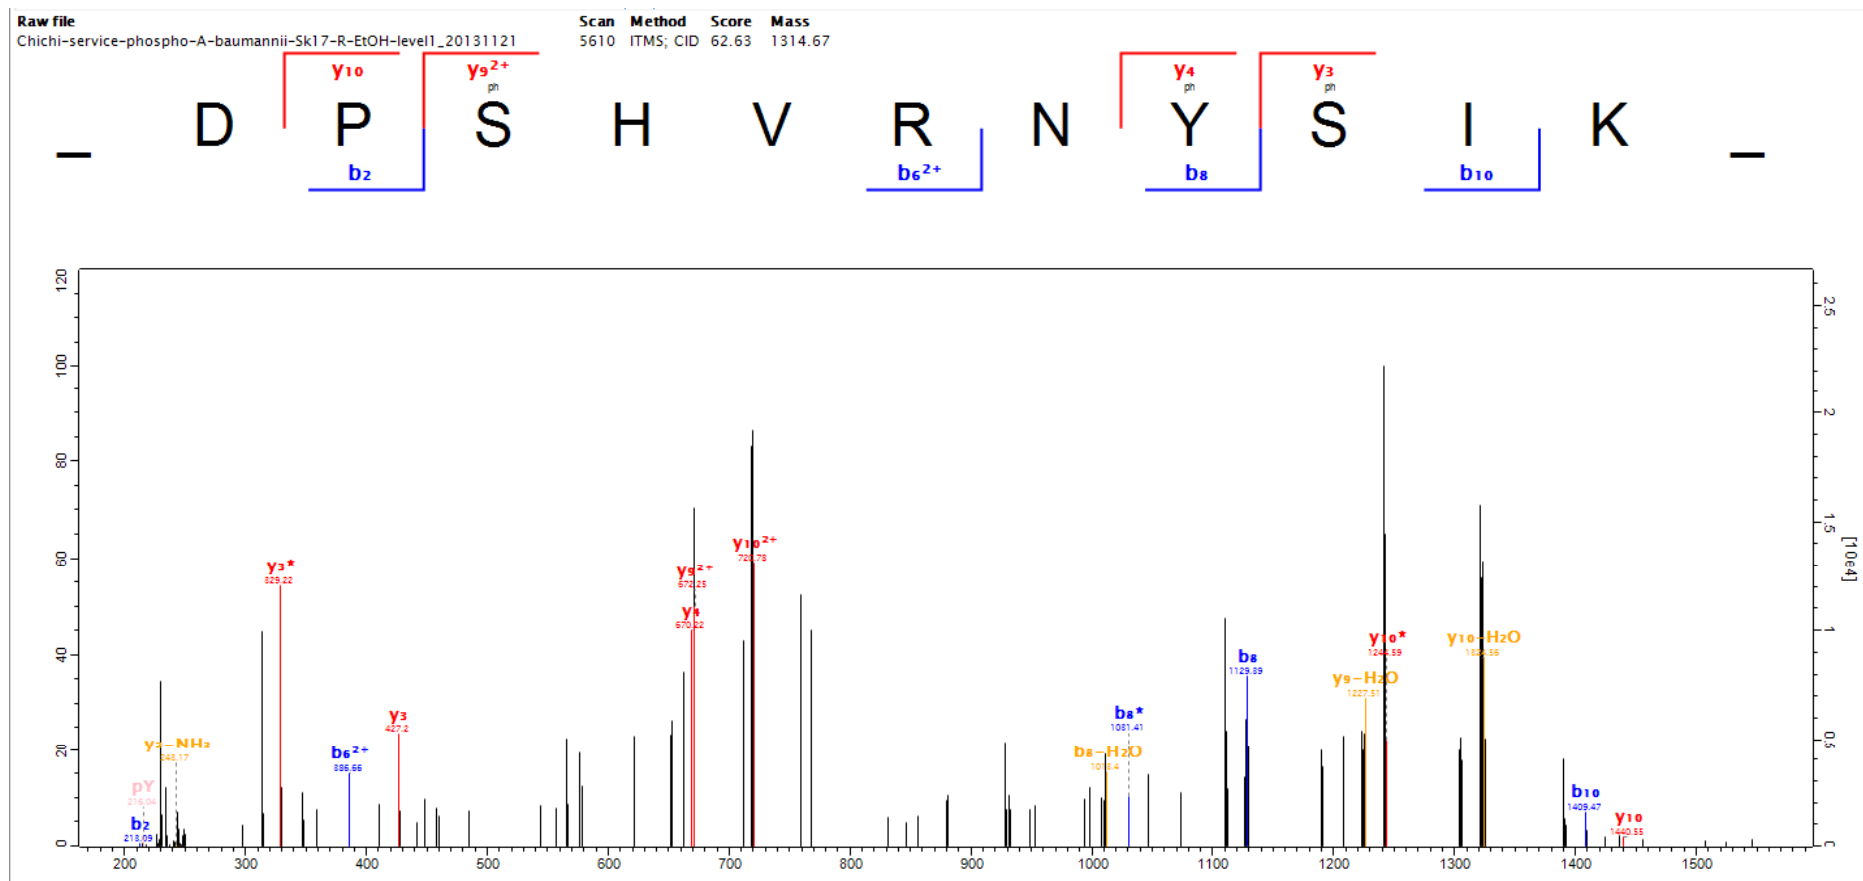

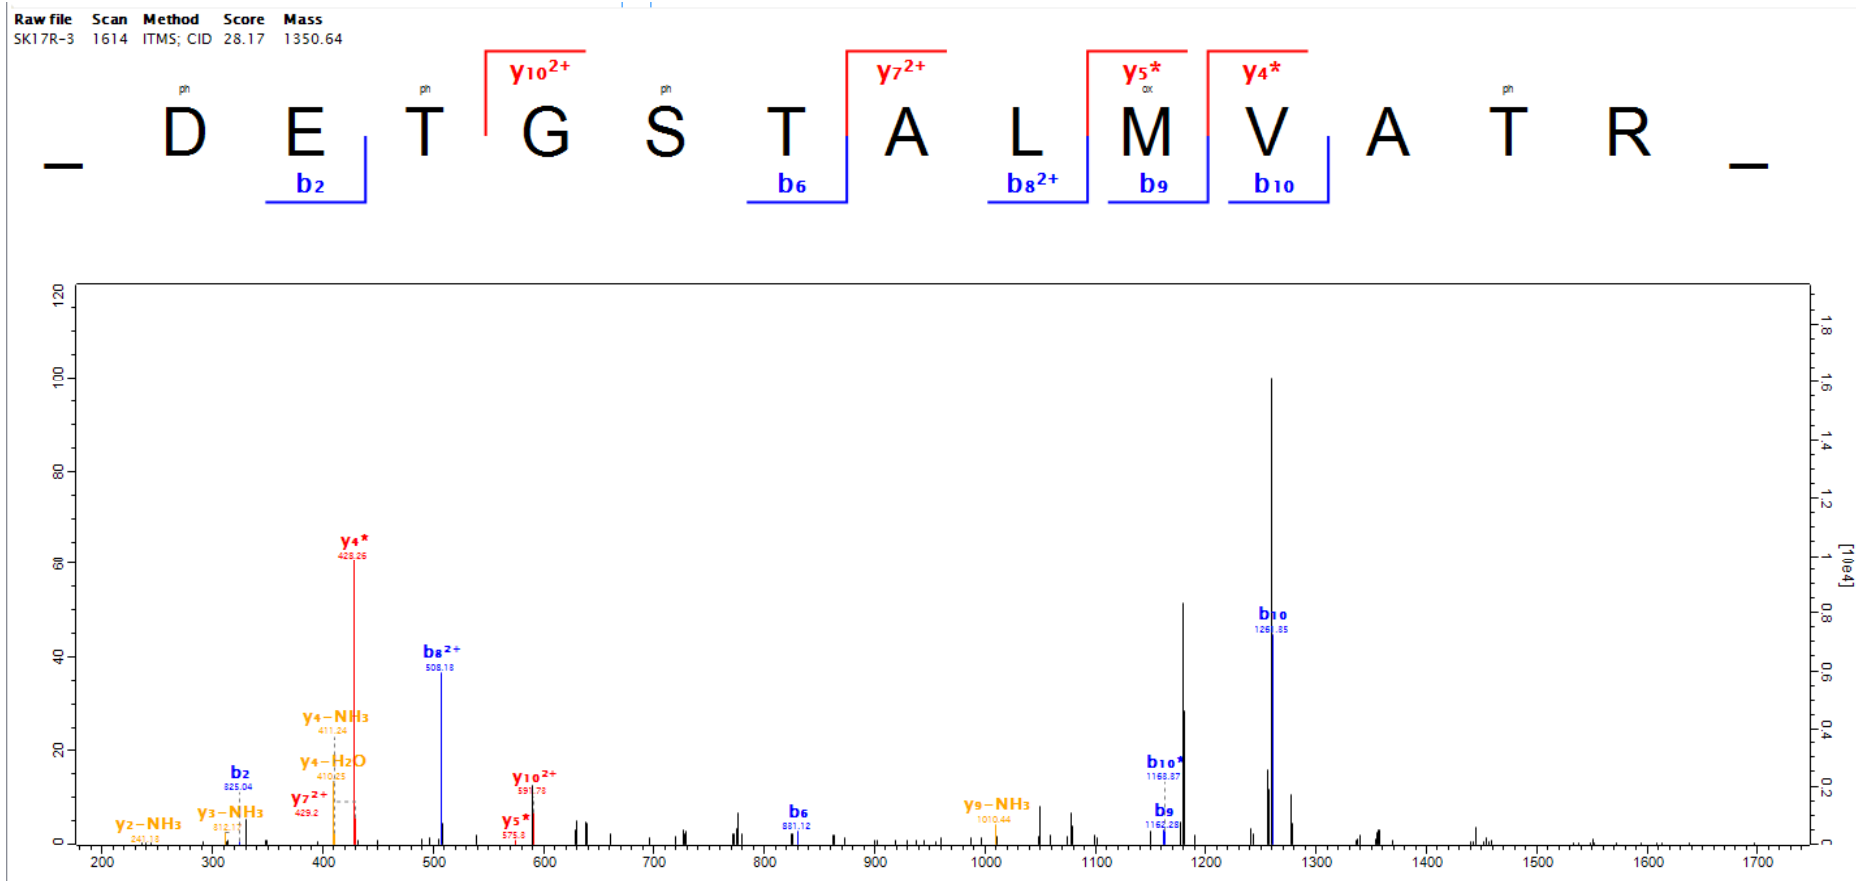

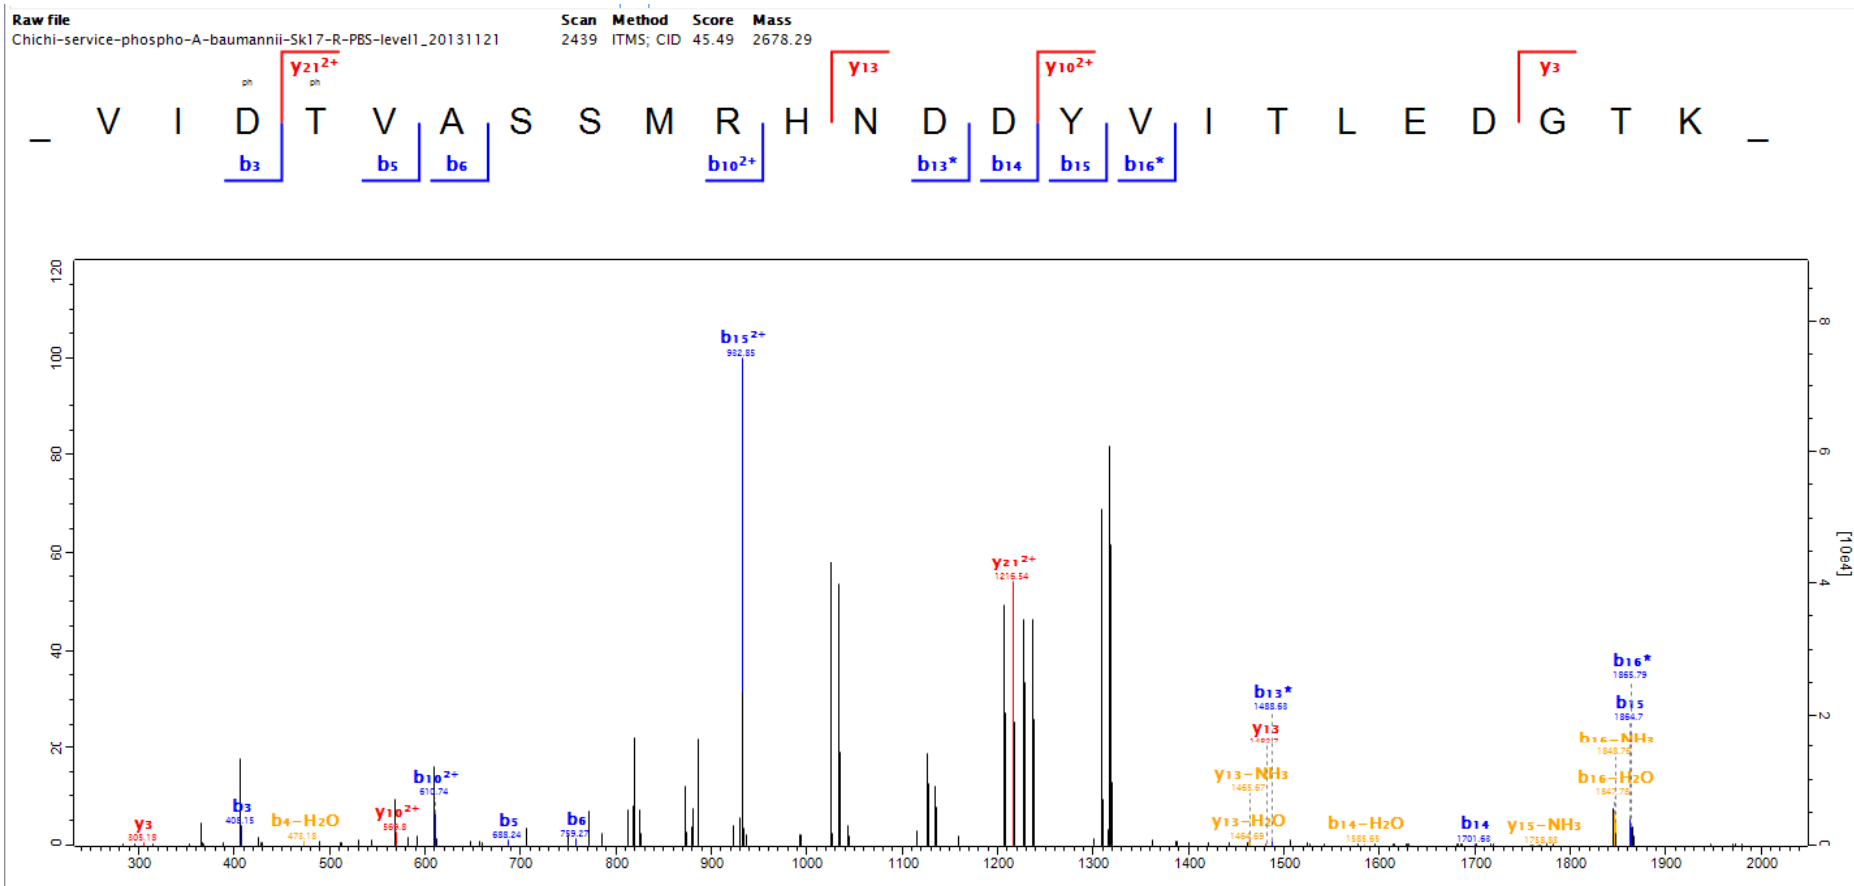

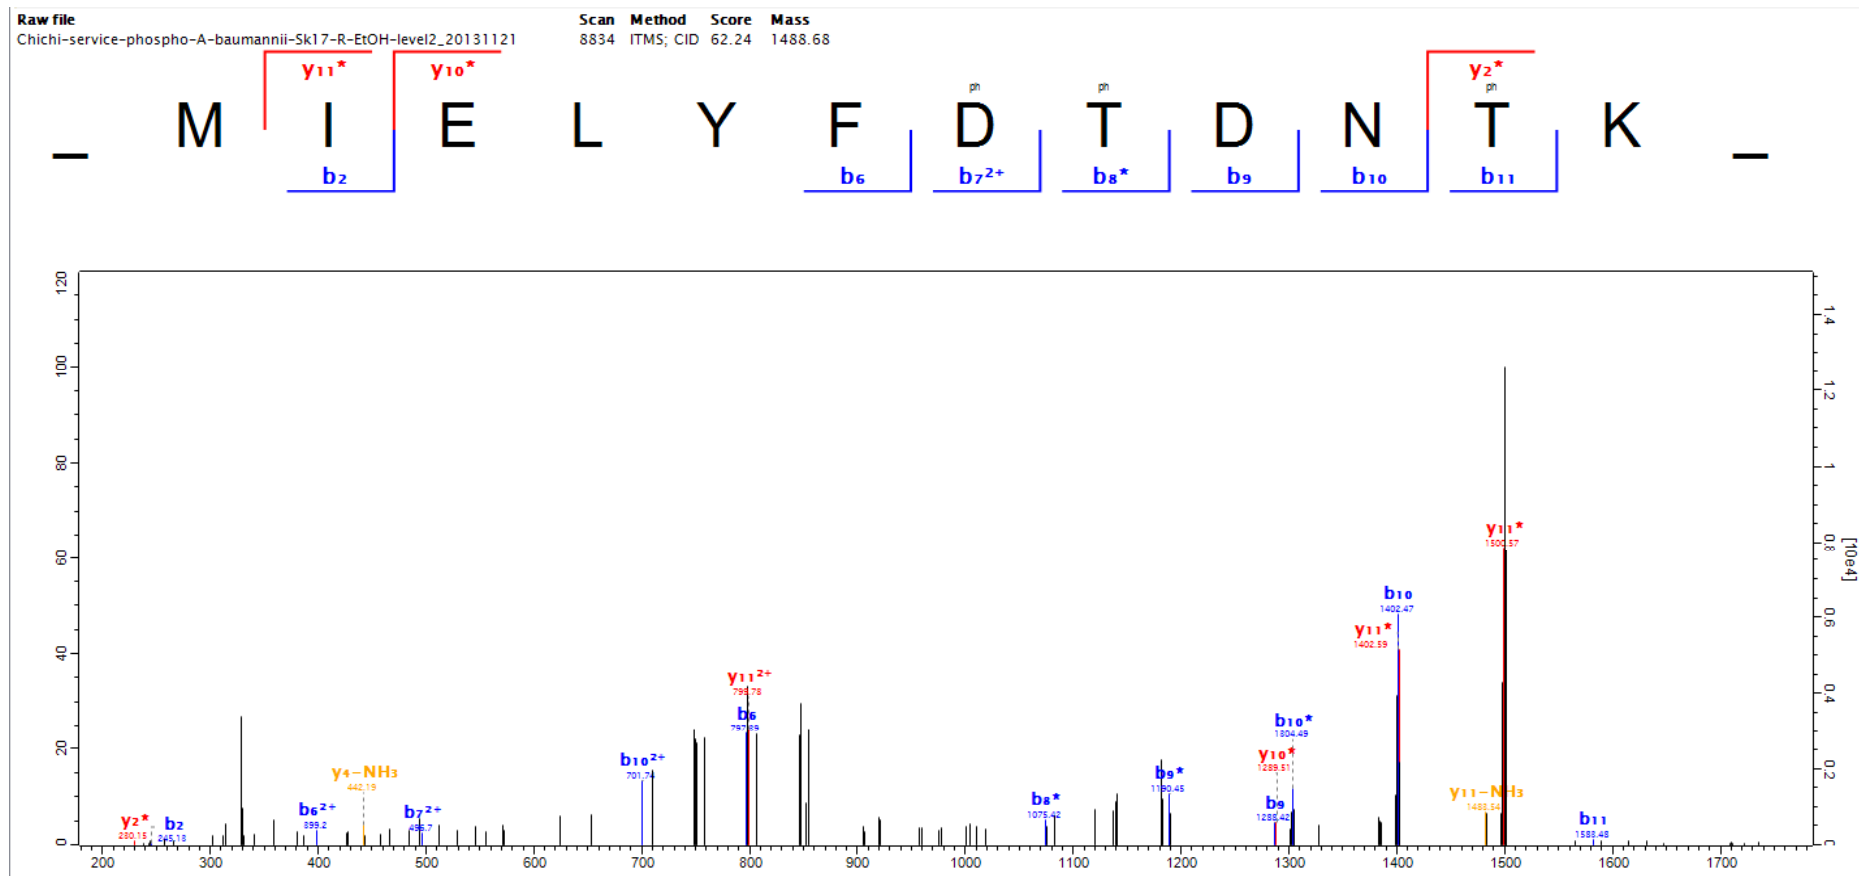

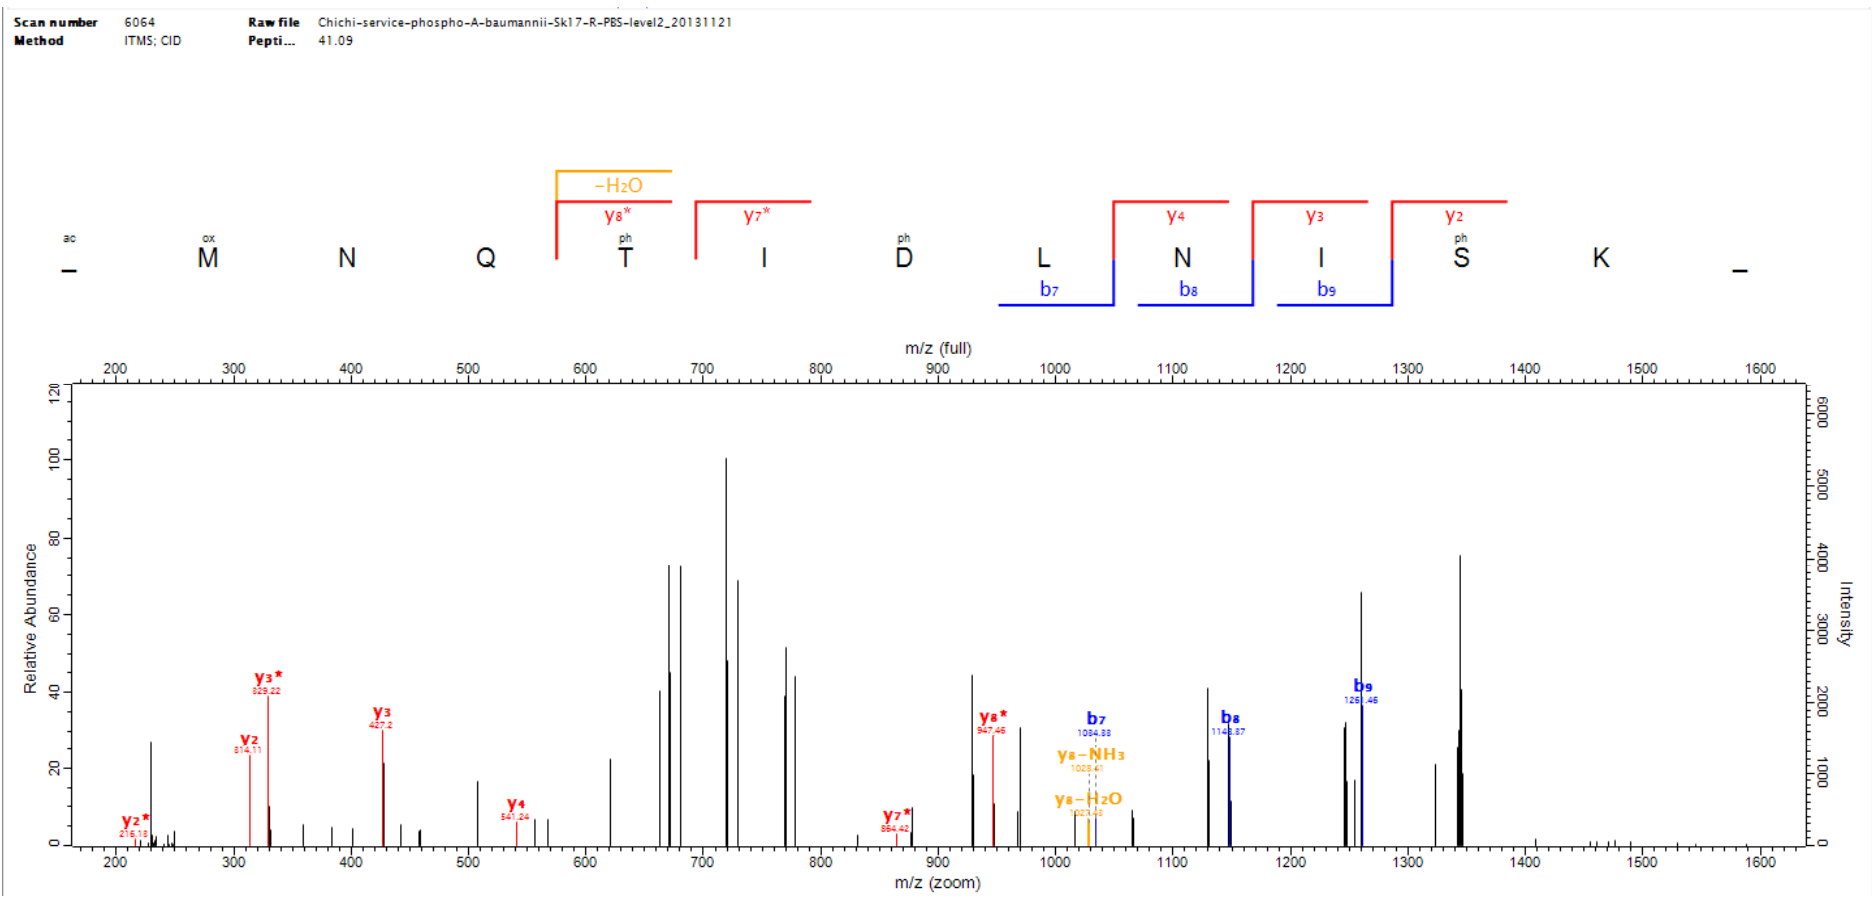

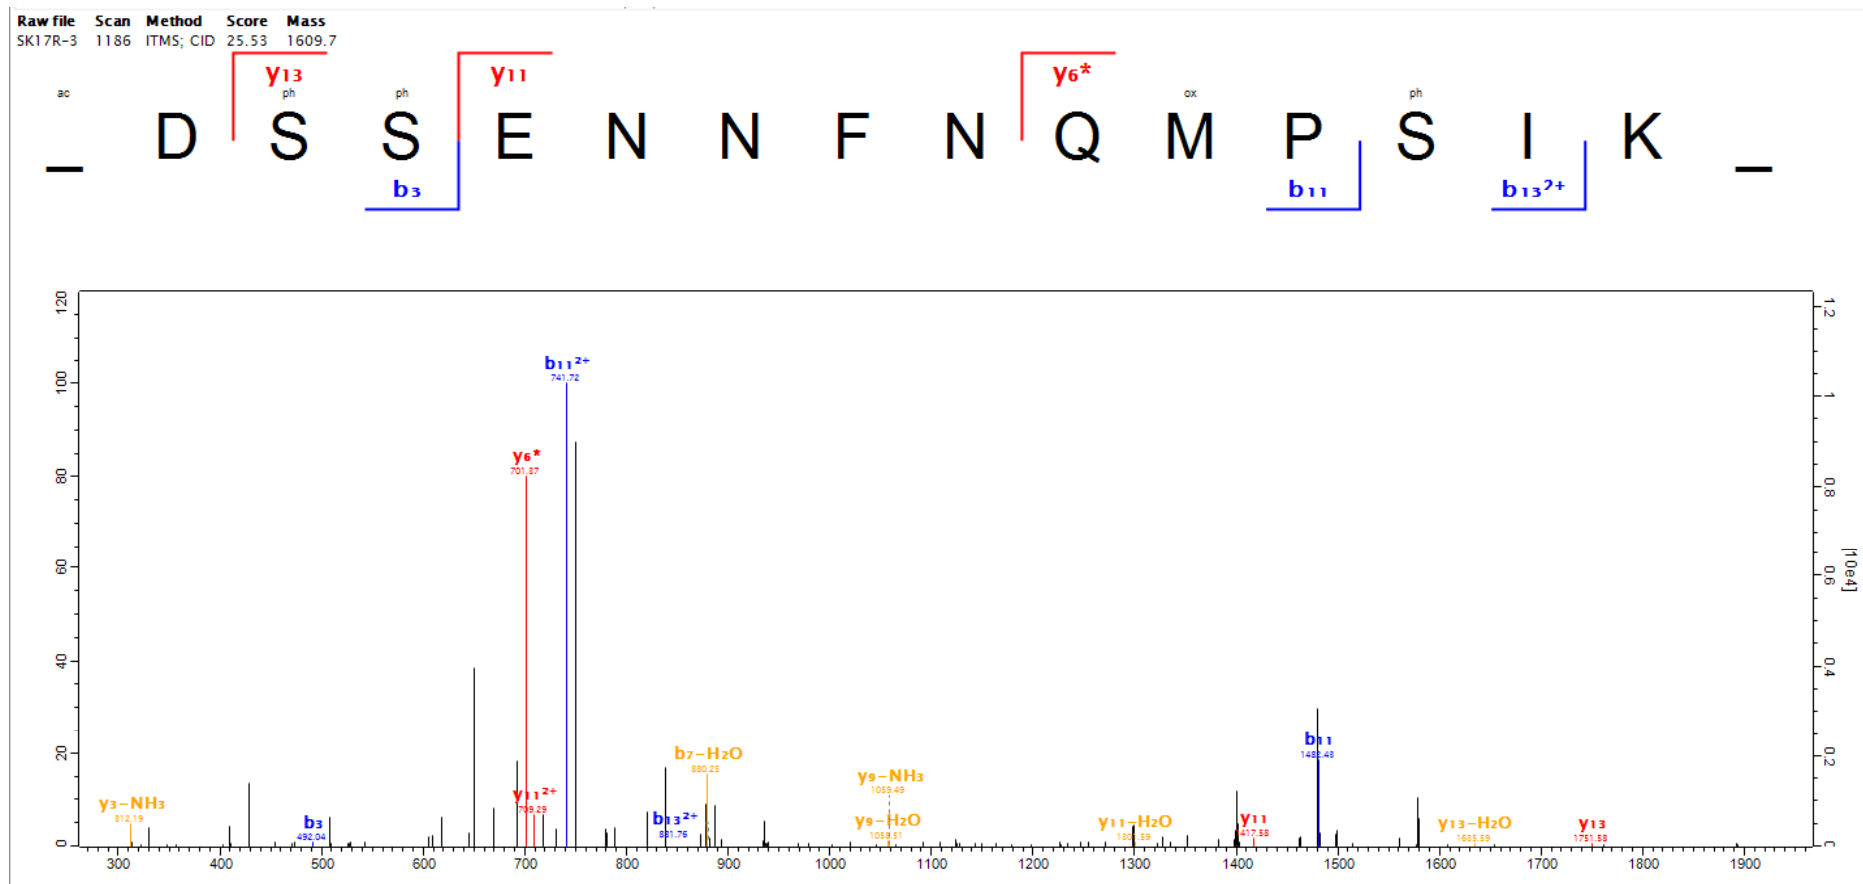

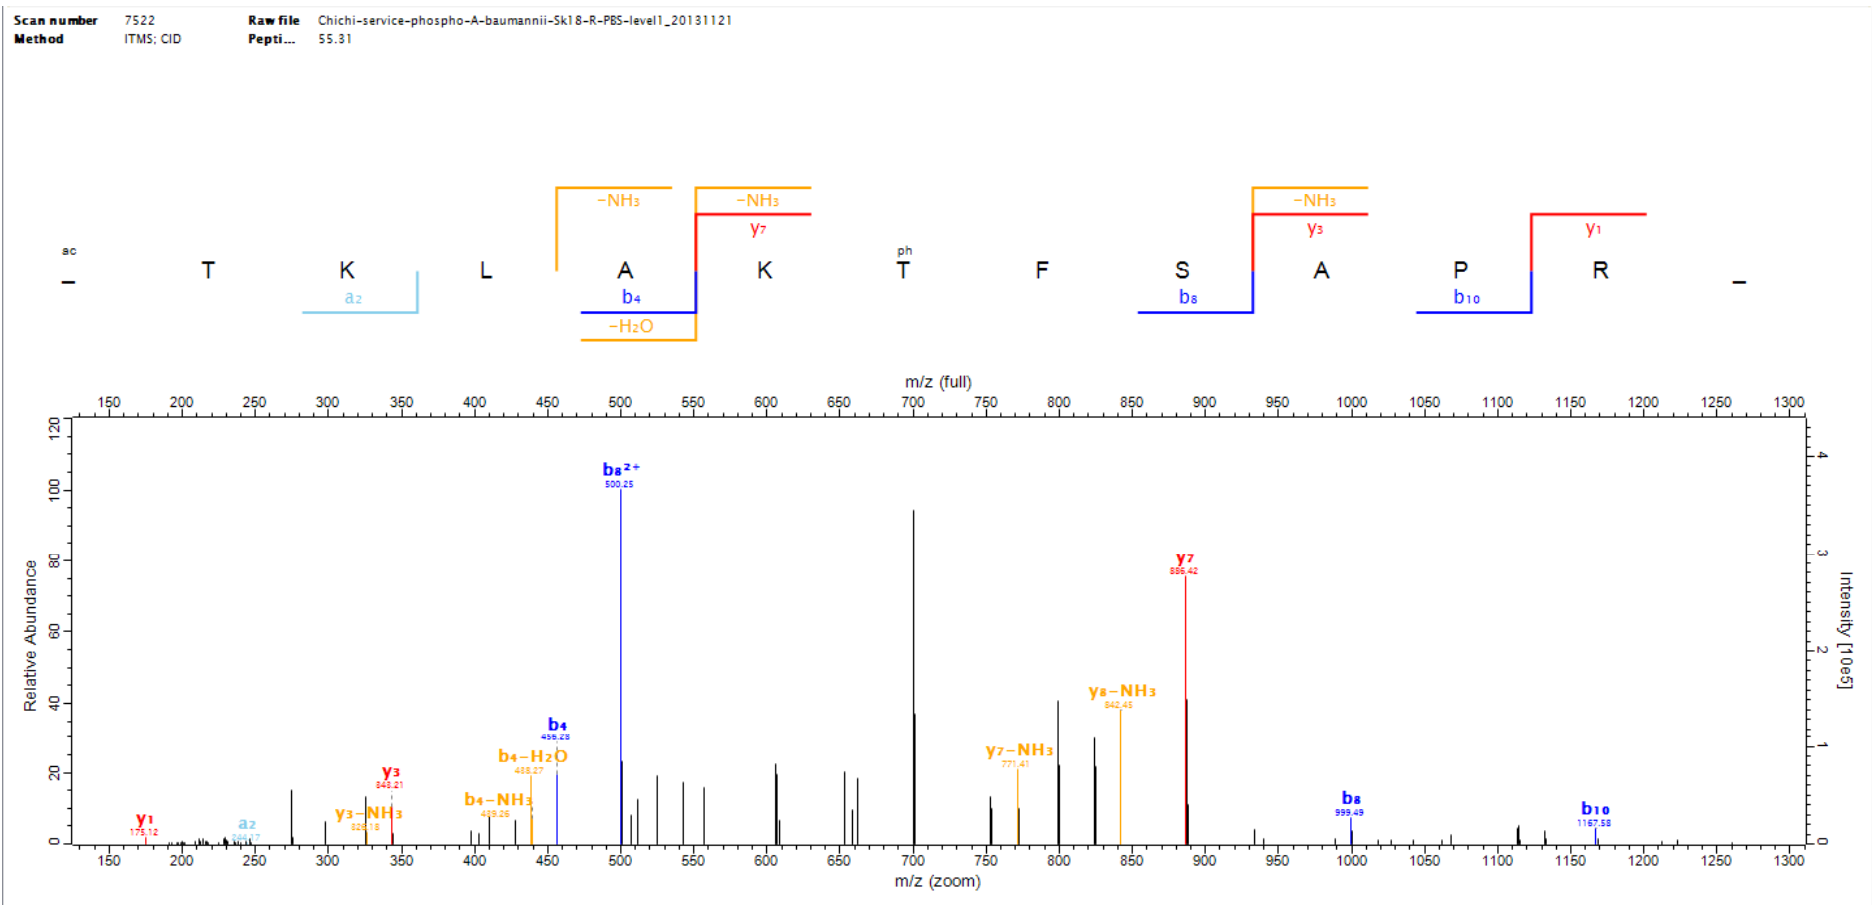

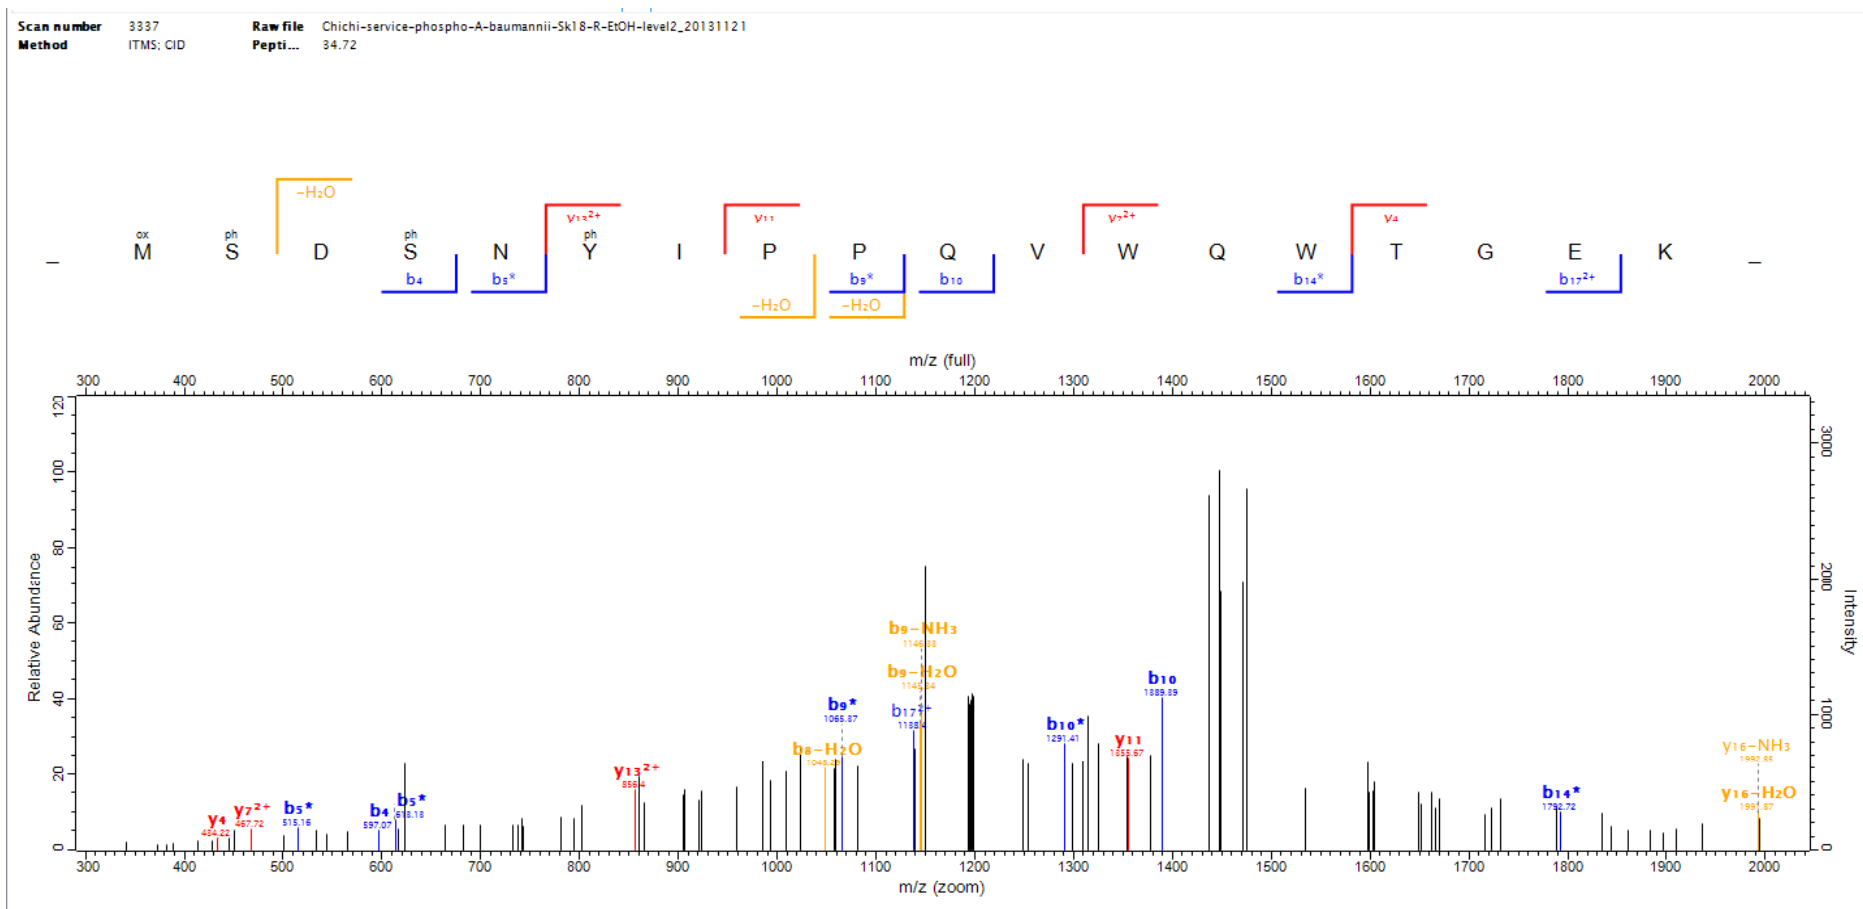



96-1

Scan number 4383 Raw file Chichi-service-phospho-A-baumannii-Sk17-R-PBS-level2\_20131121  
Method ITMS: CID Pepti... 52.39

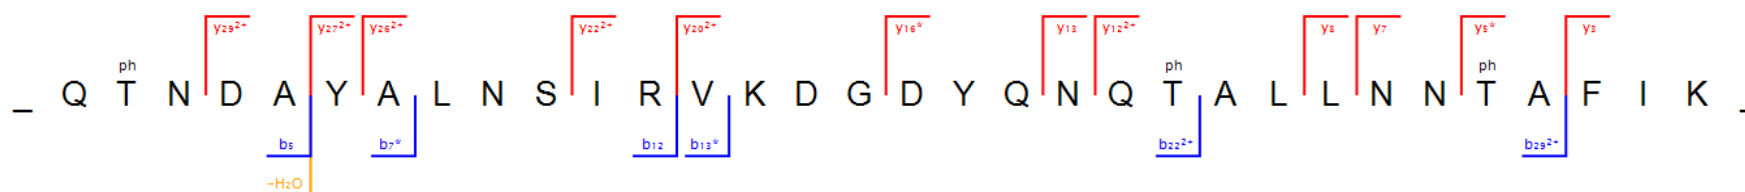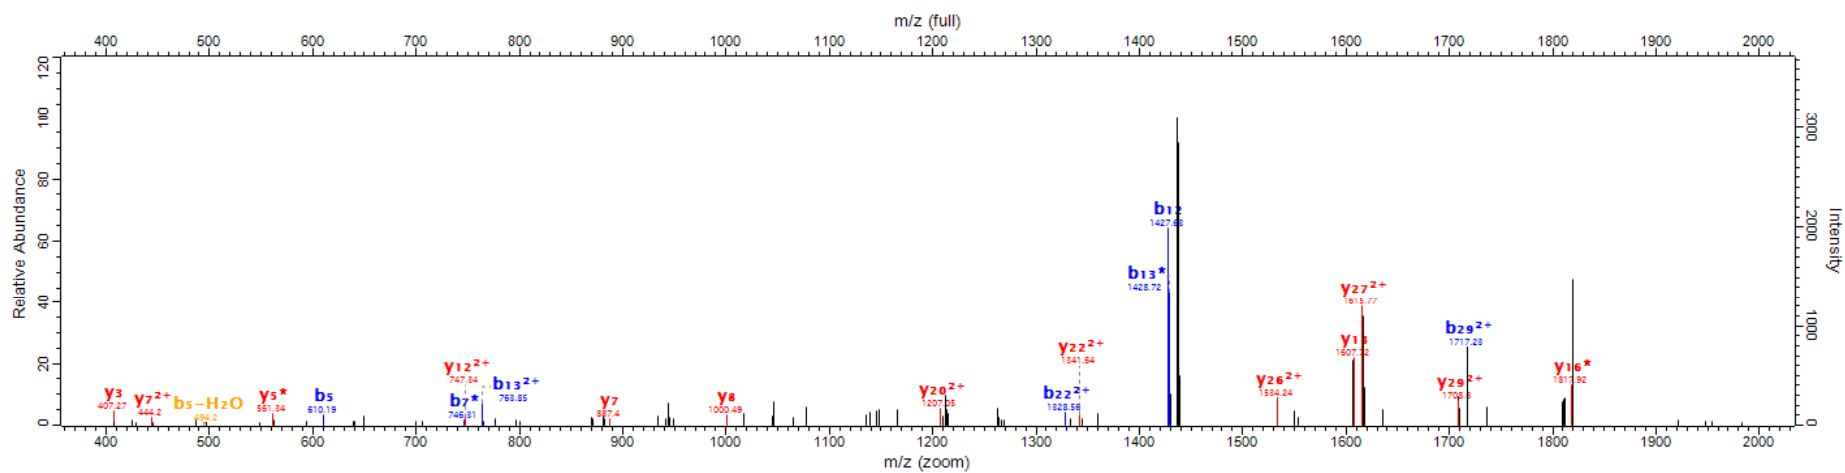

96-2

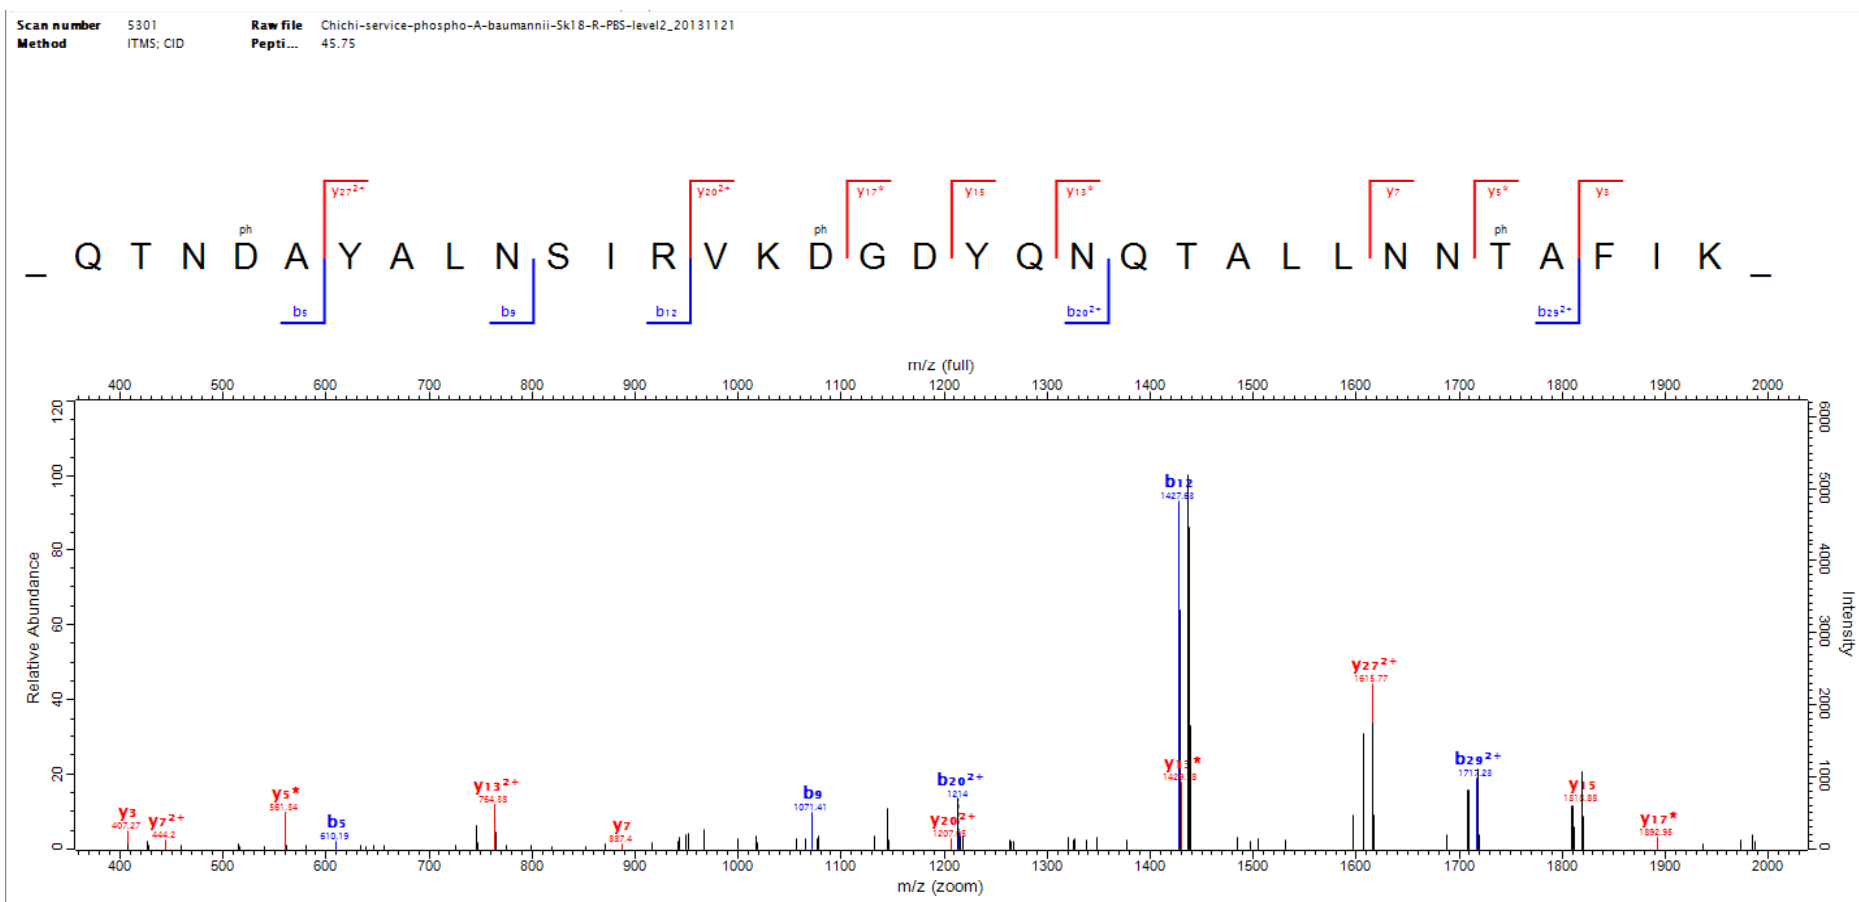

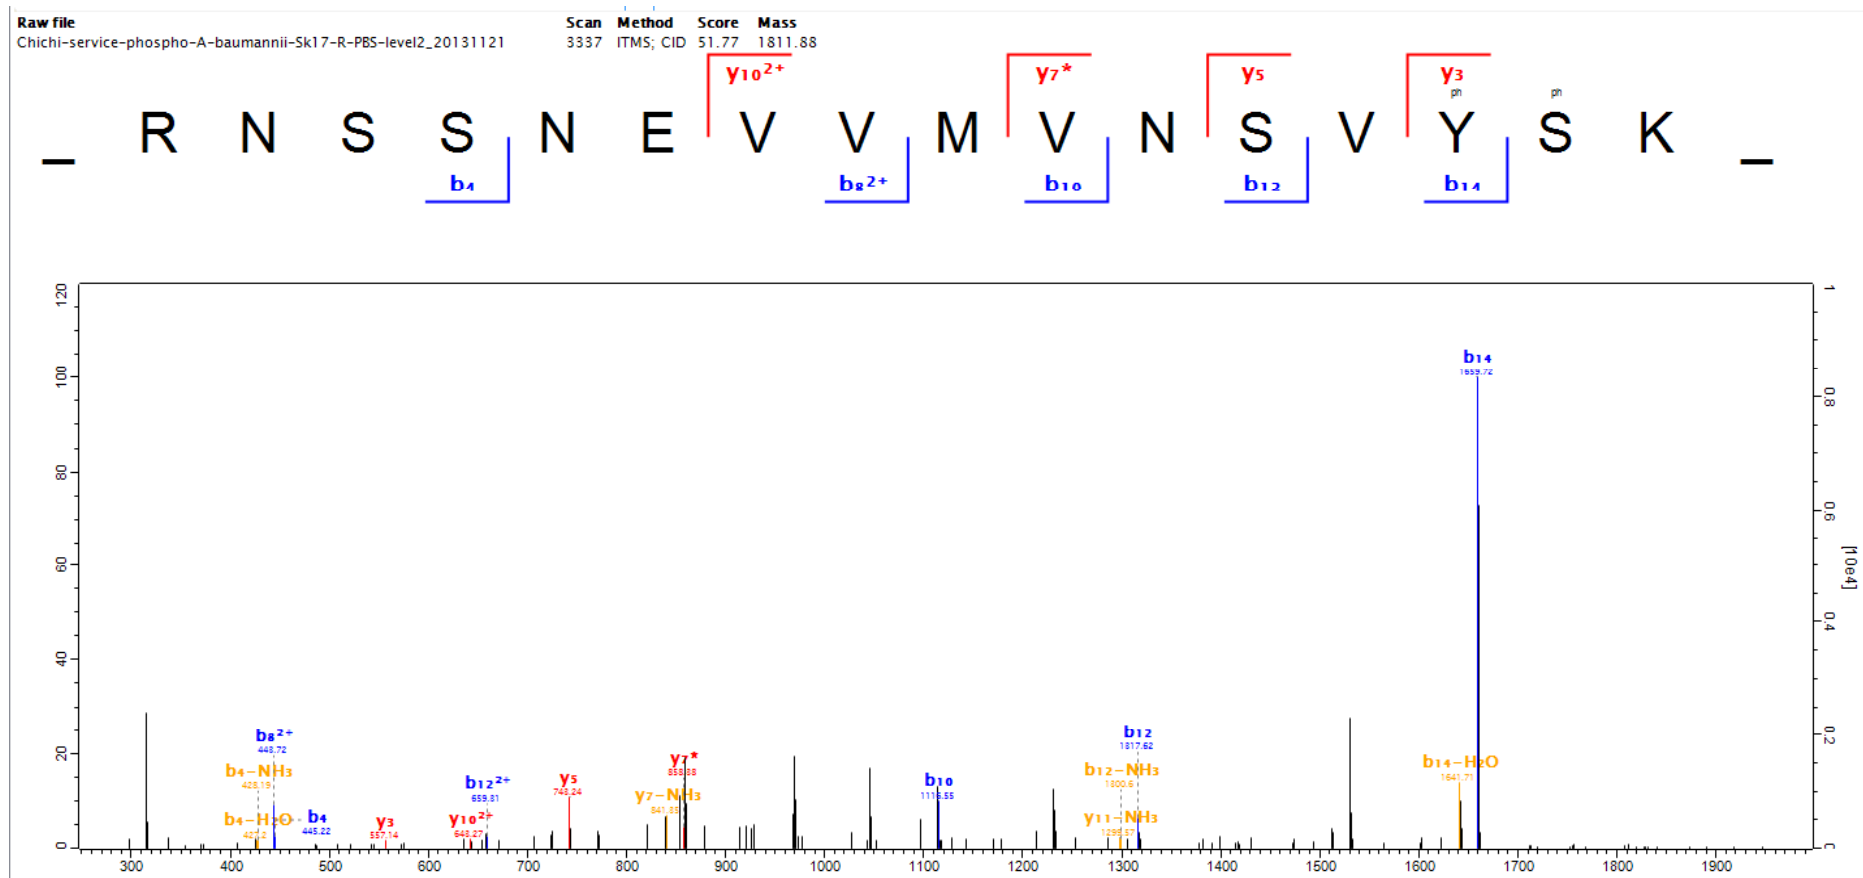

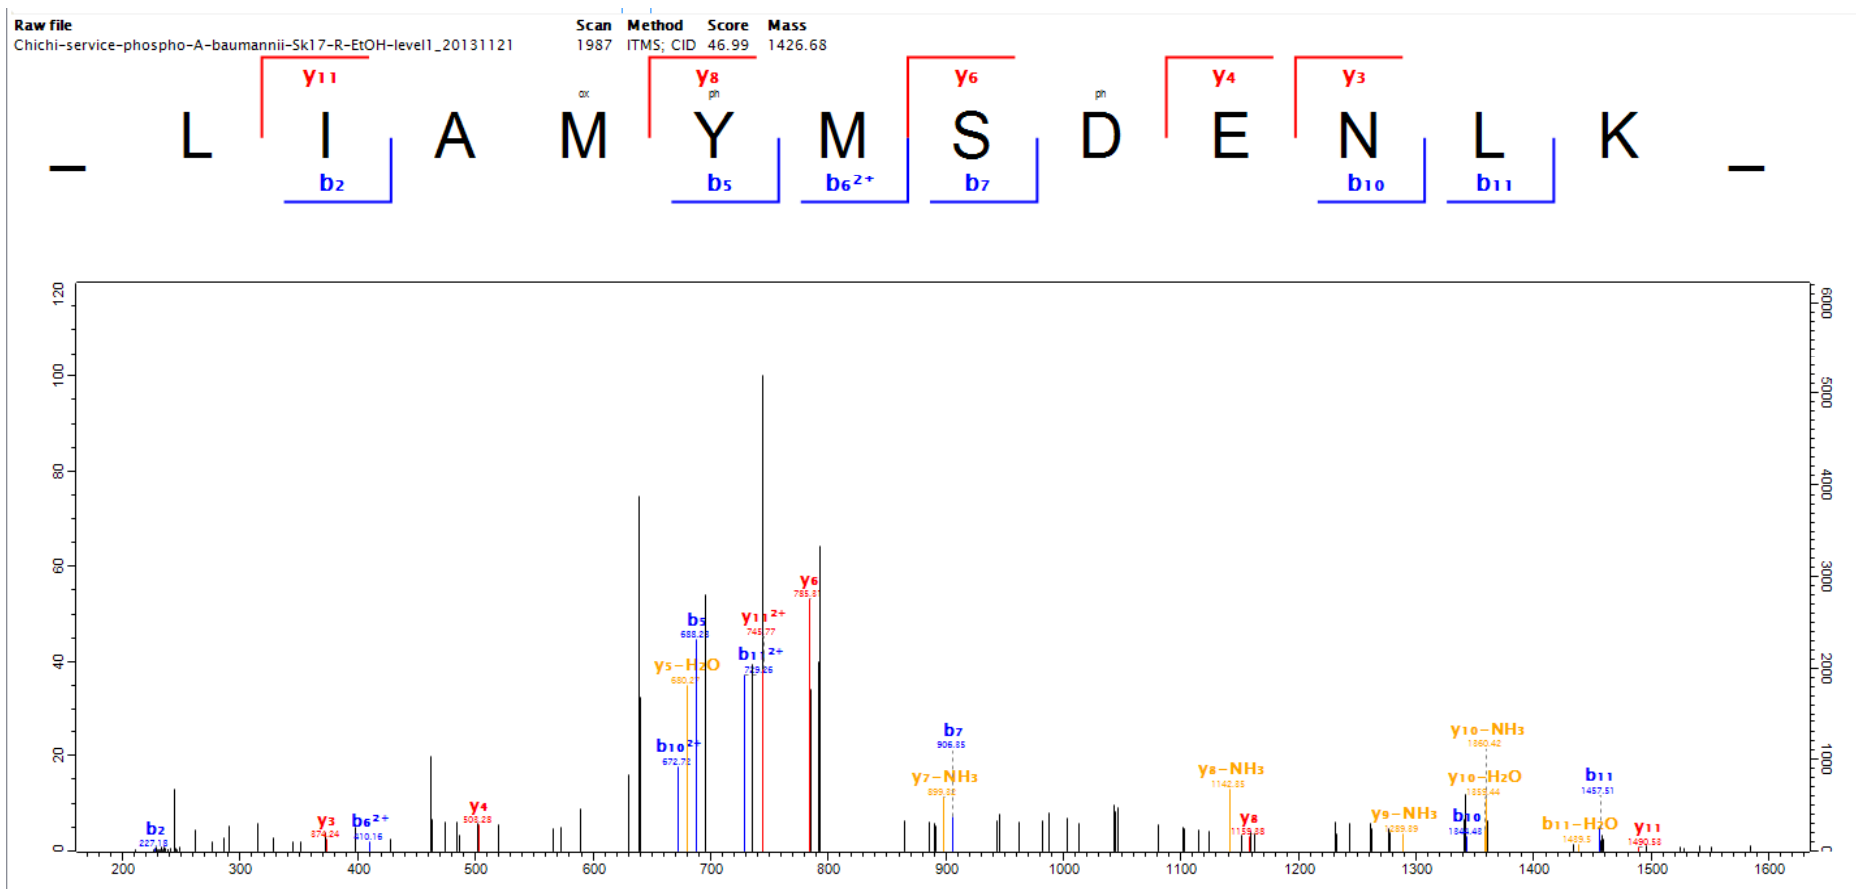

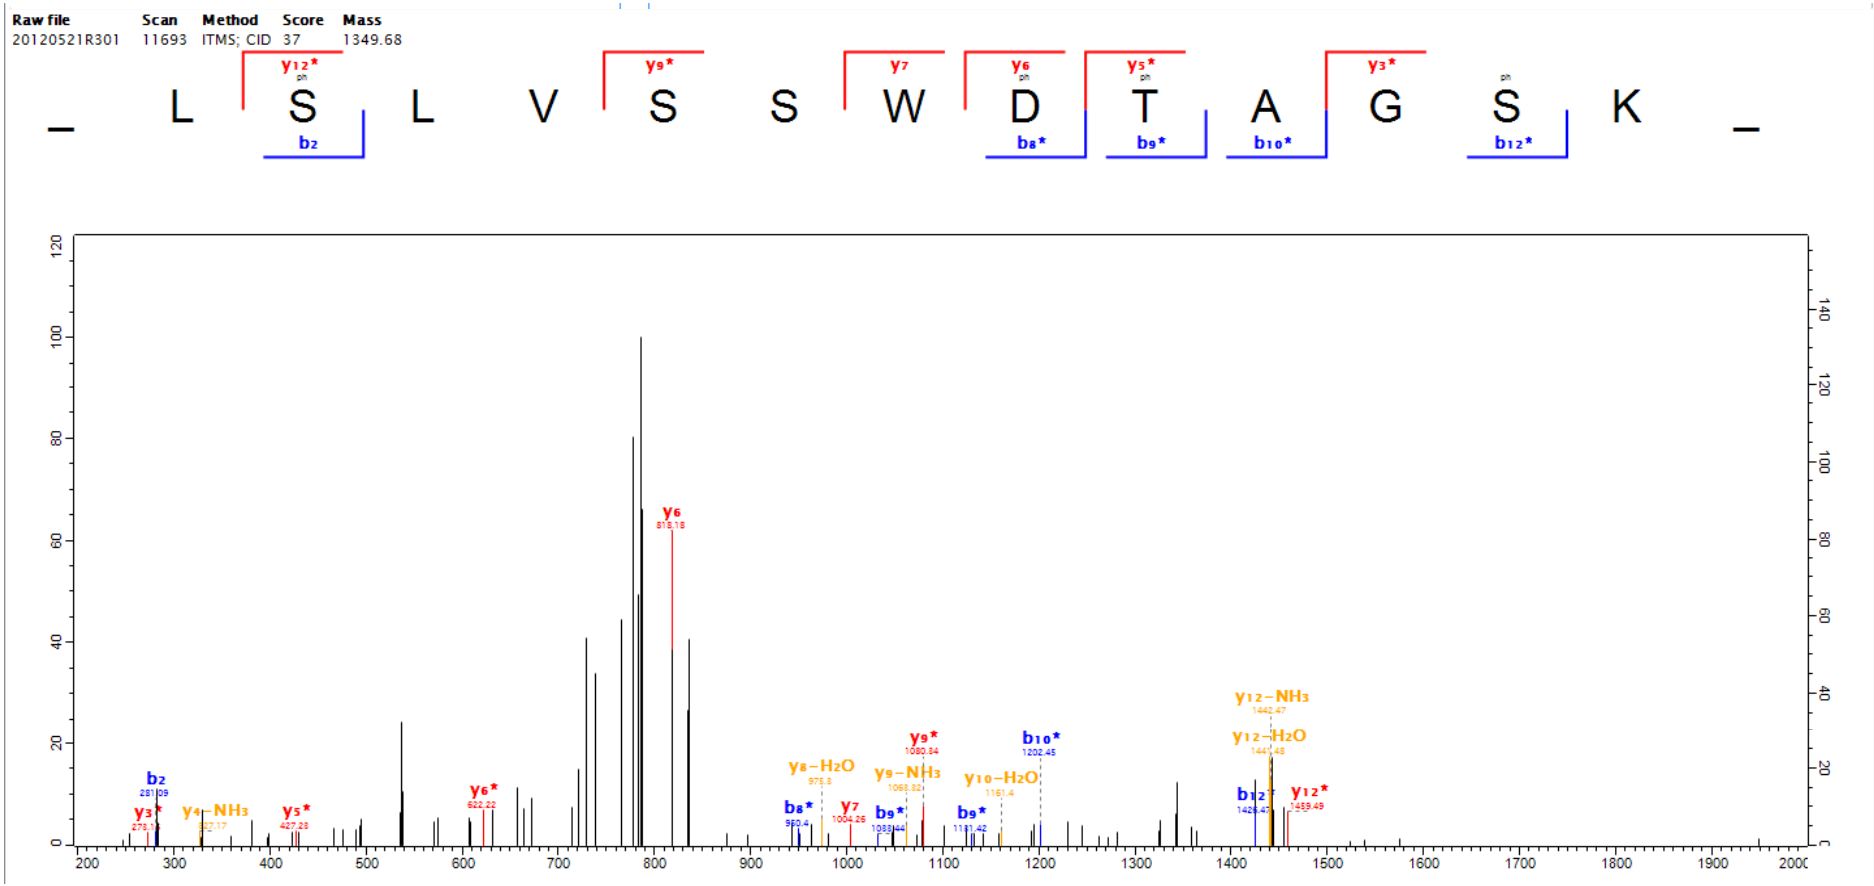

100

Raw file 20120521R201 Scan 3748 Method ITMS; CID Score 25.82 Mass 1212.57

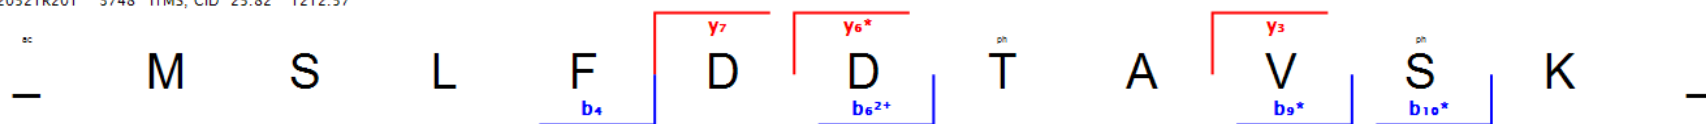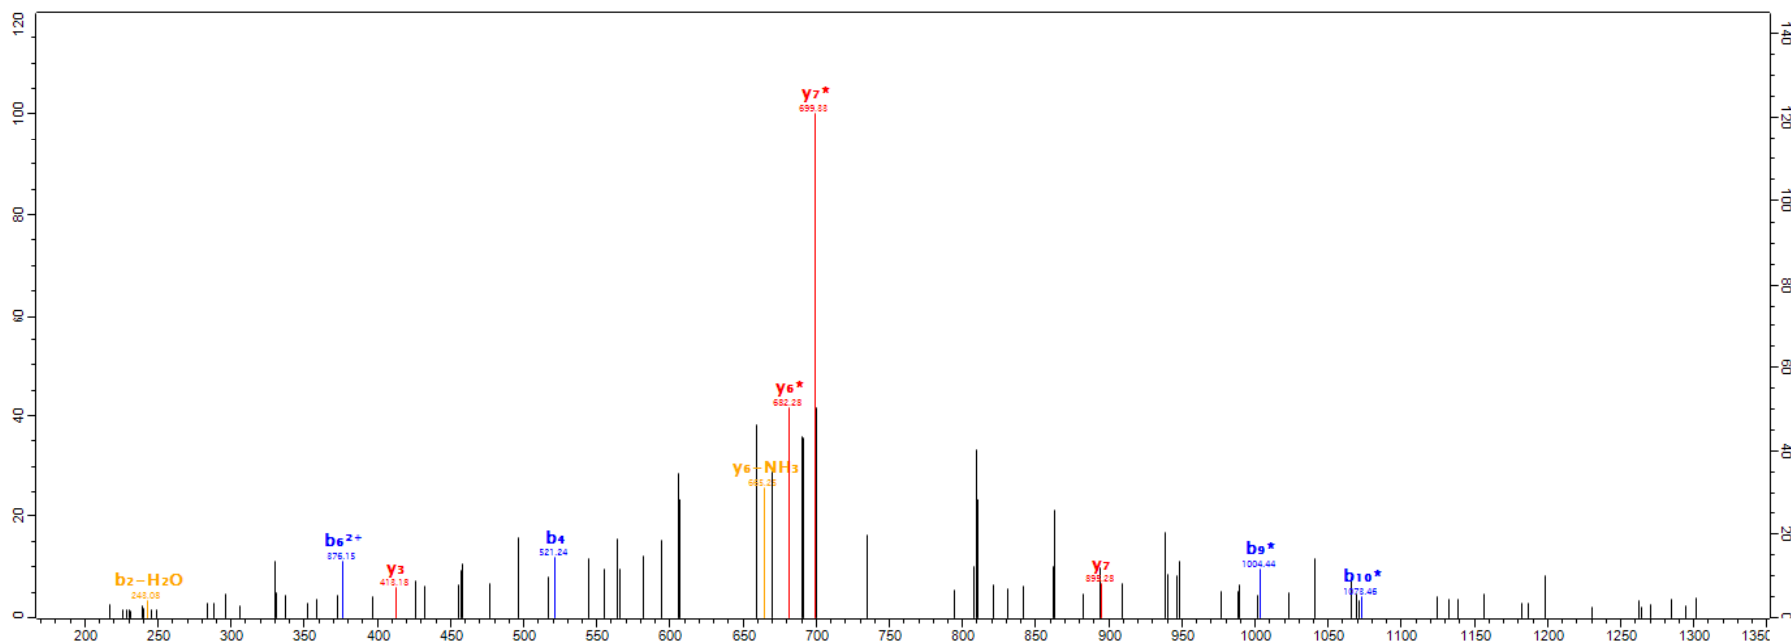

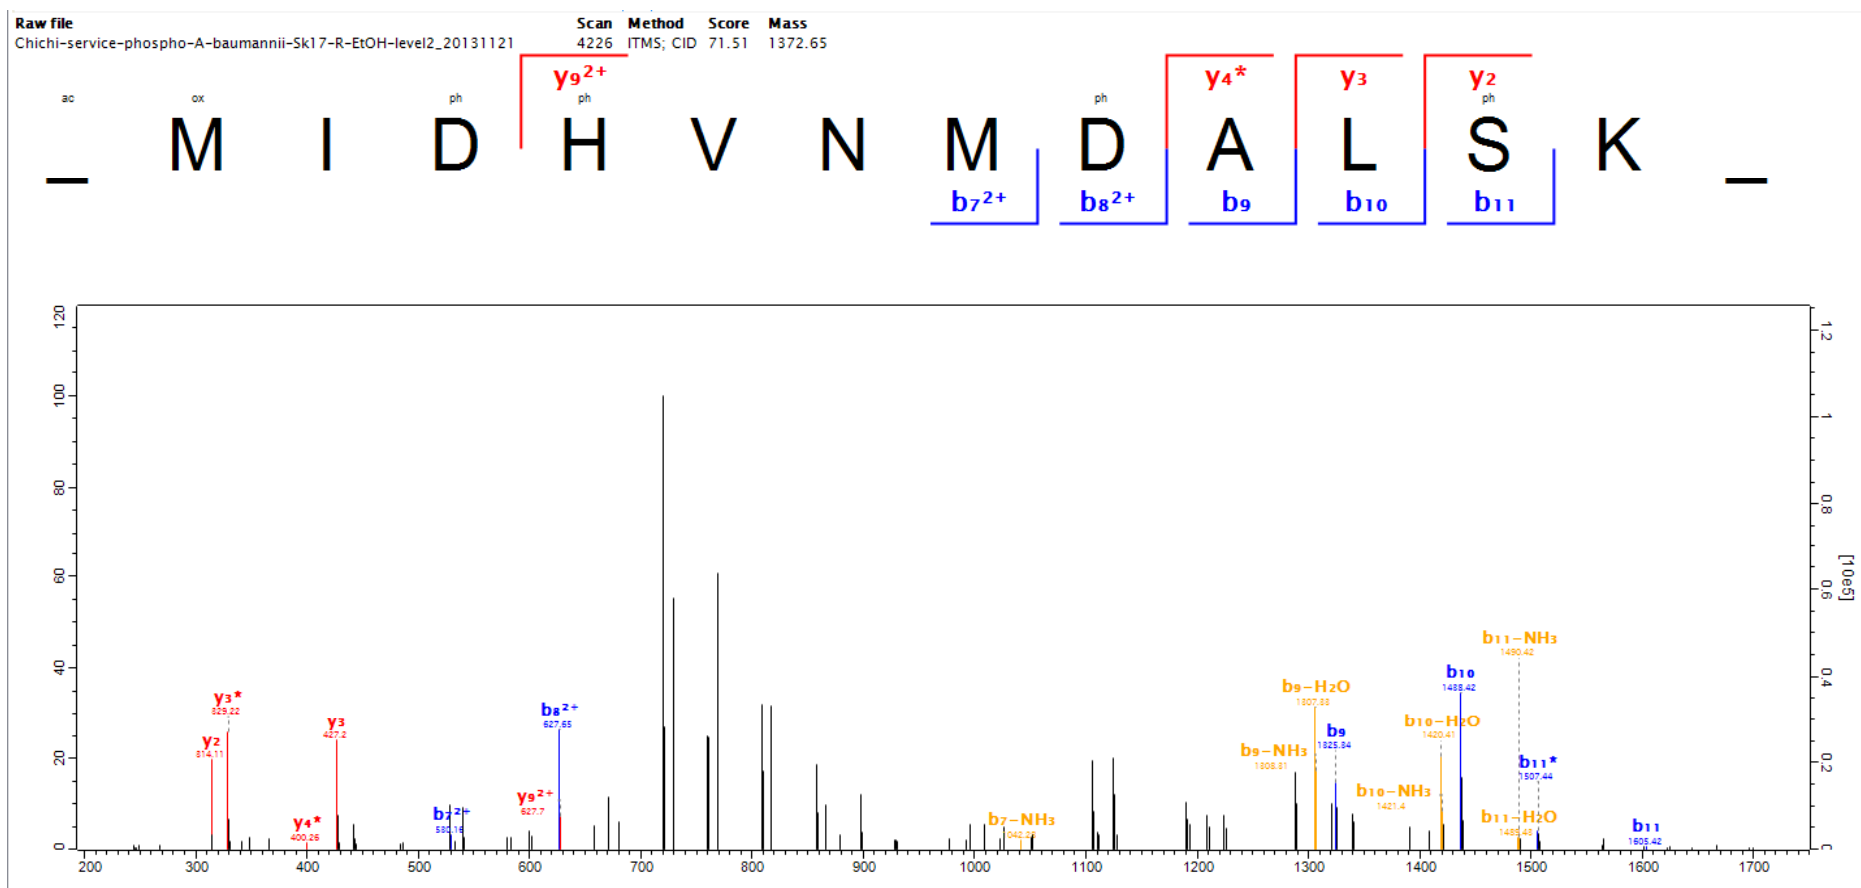

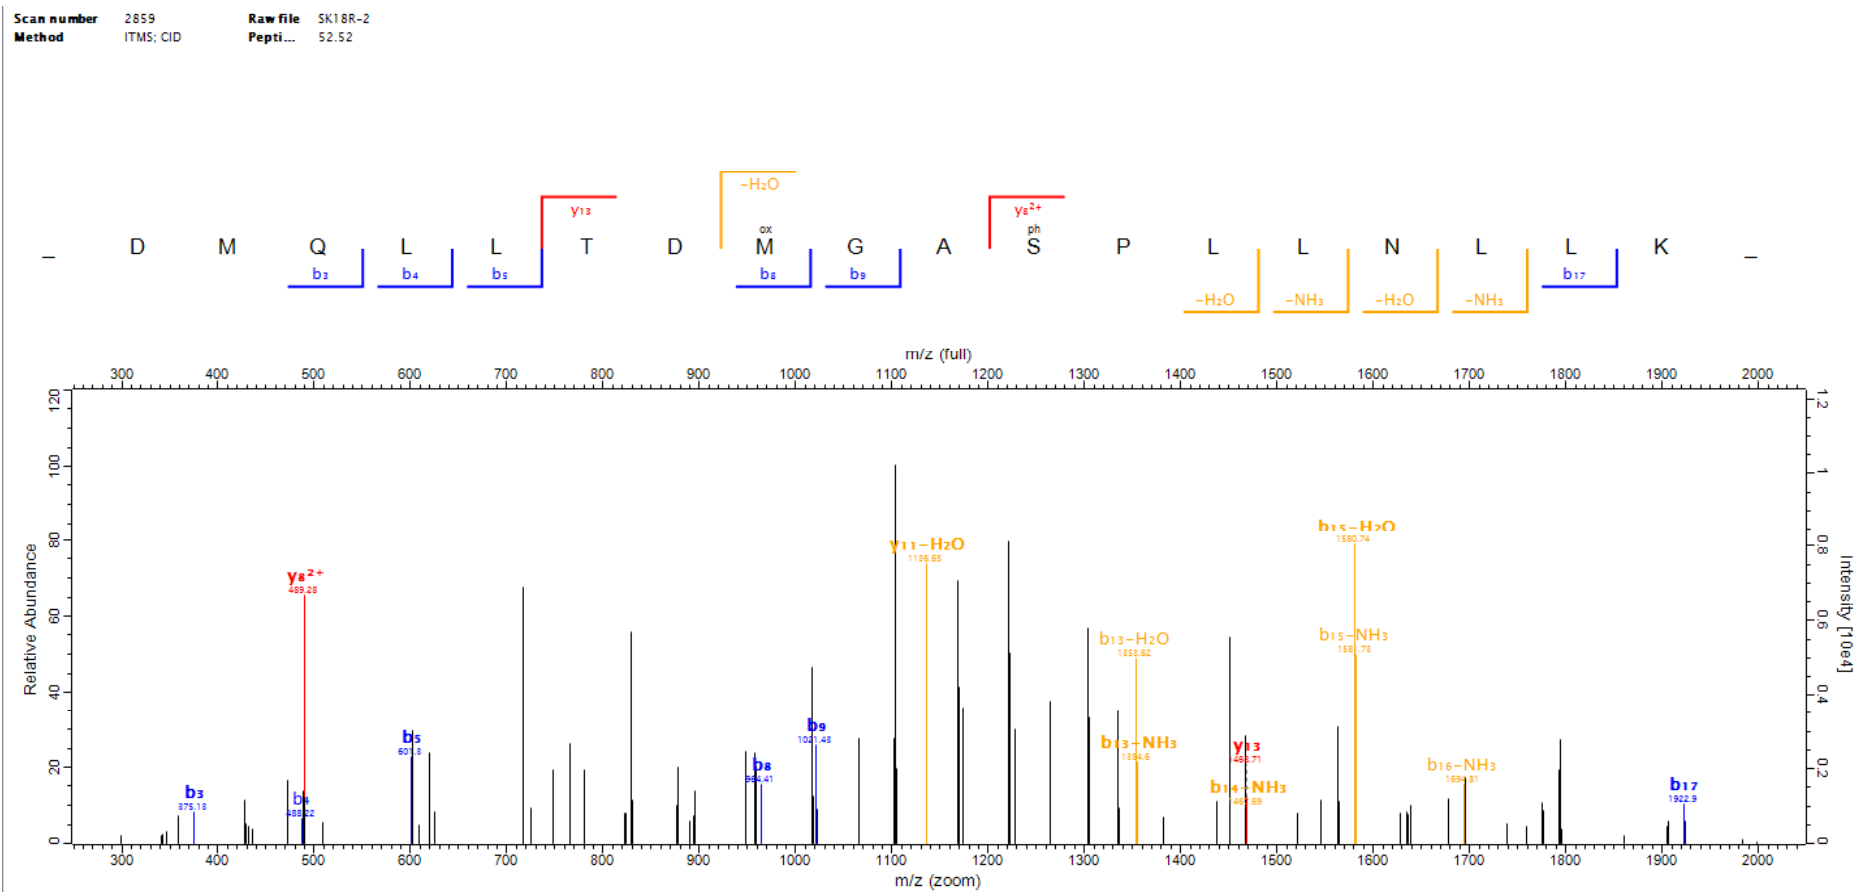



103

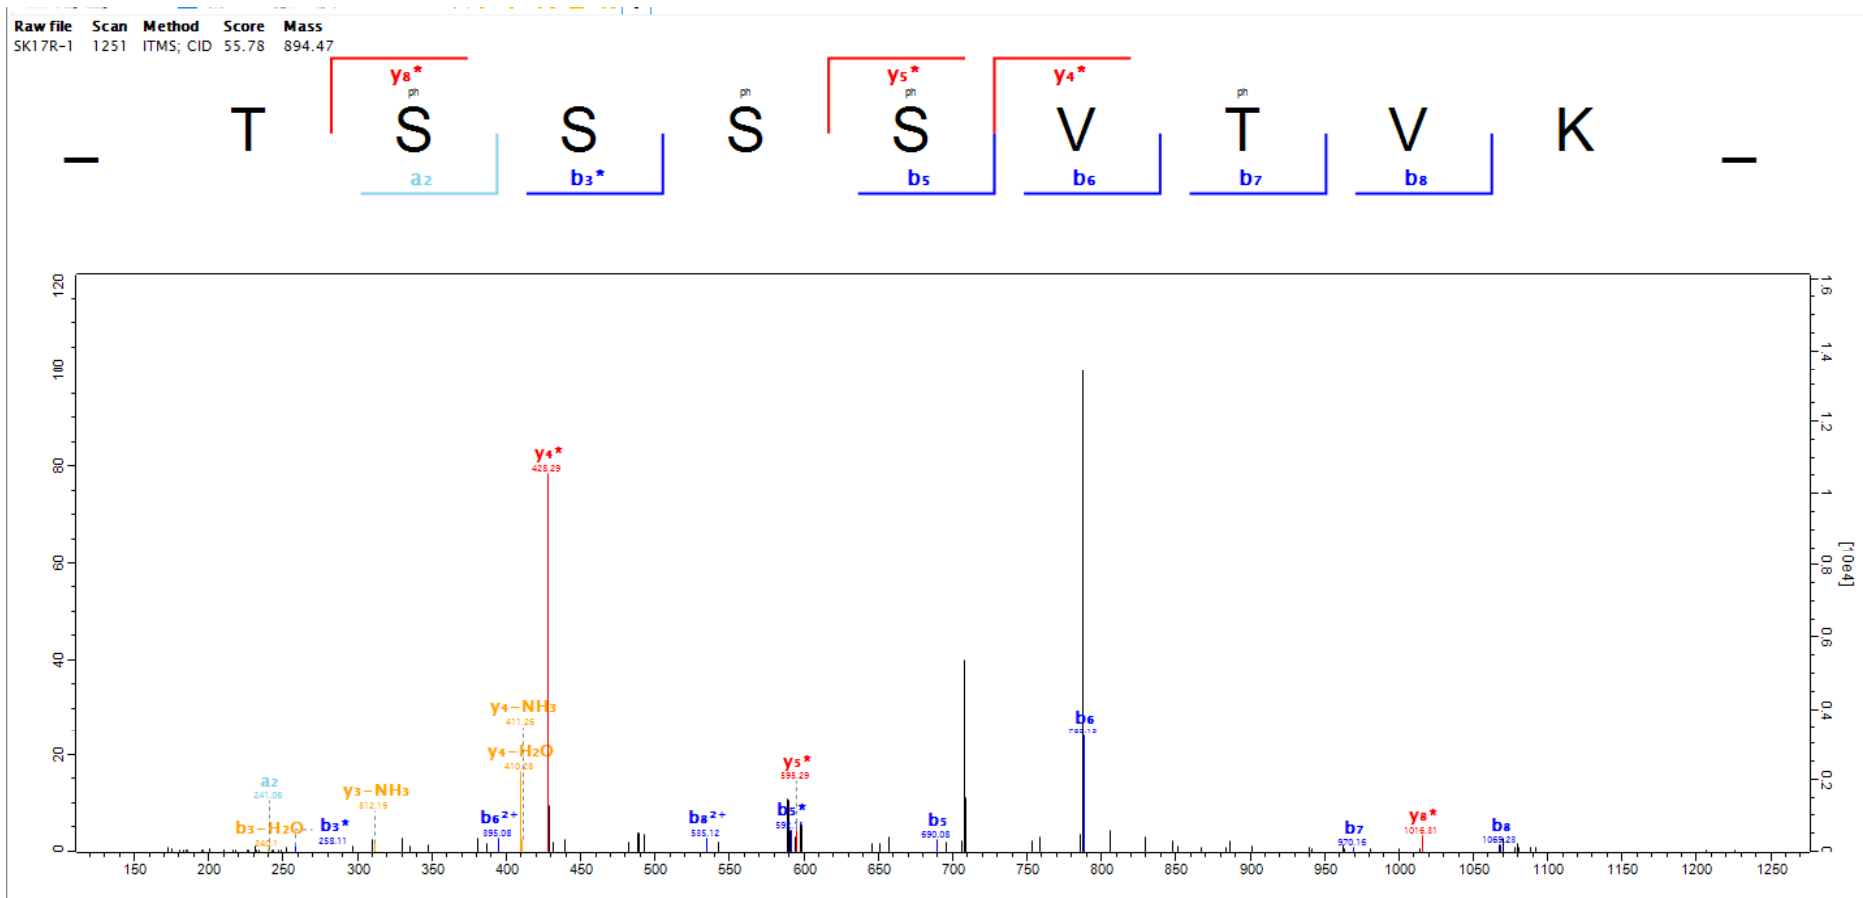

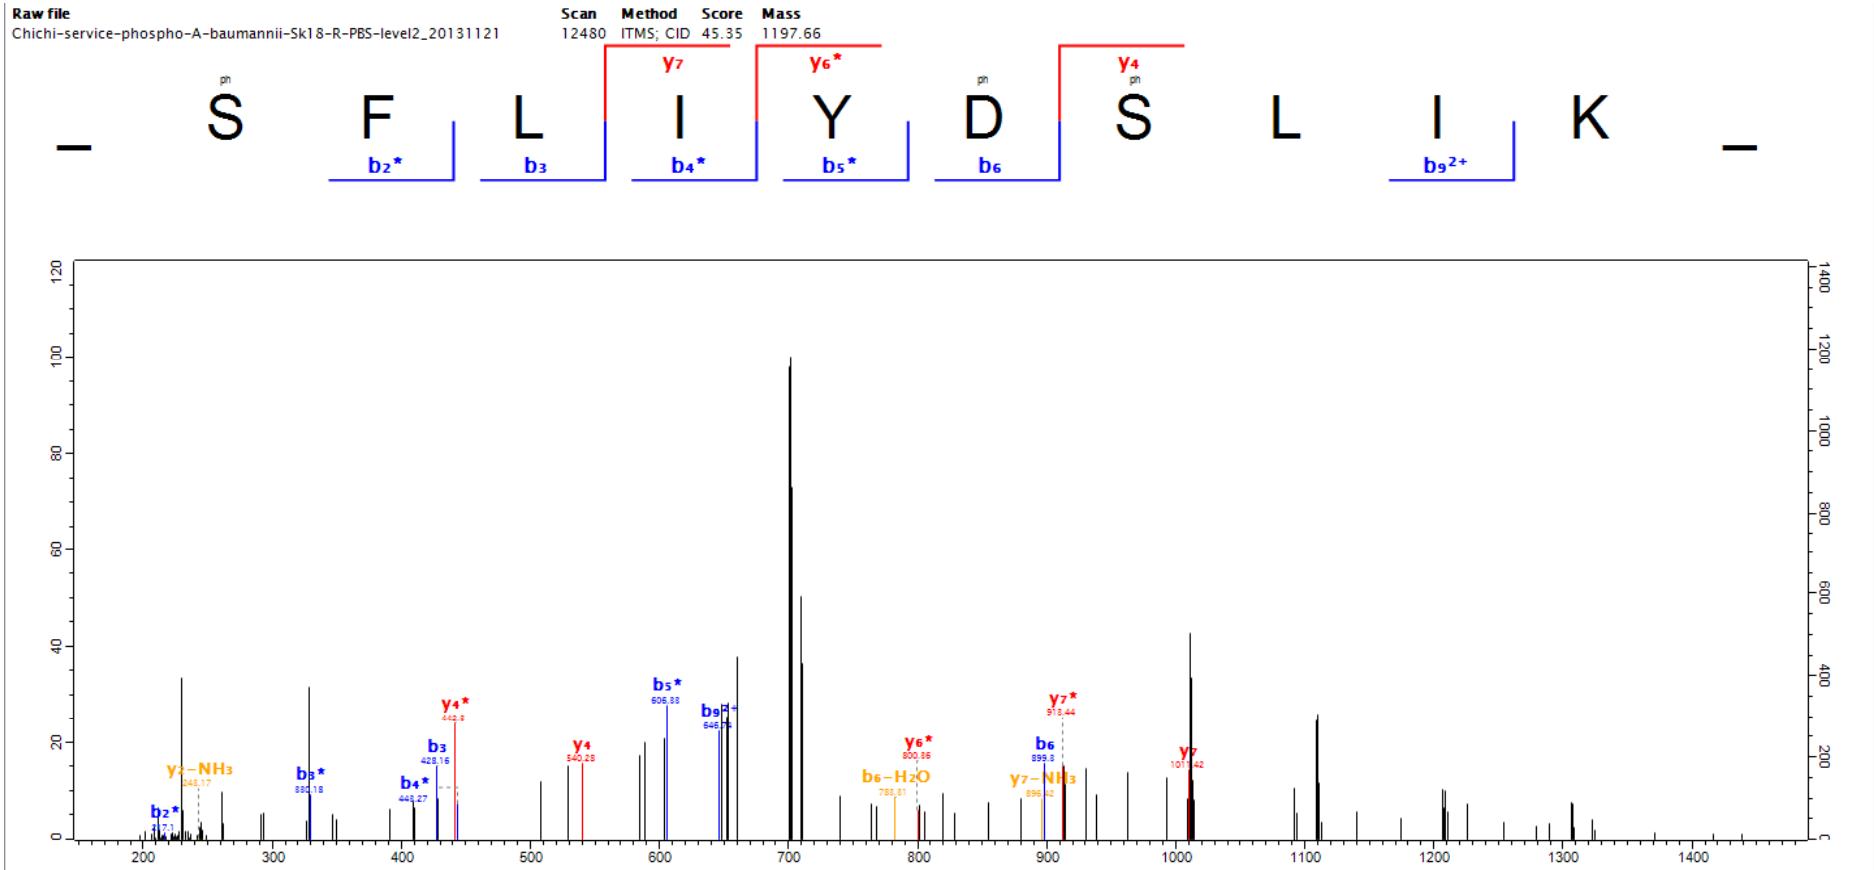

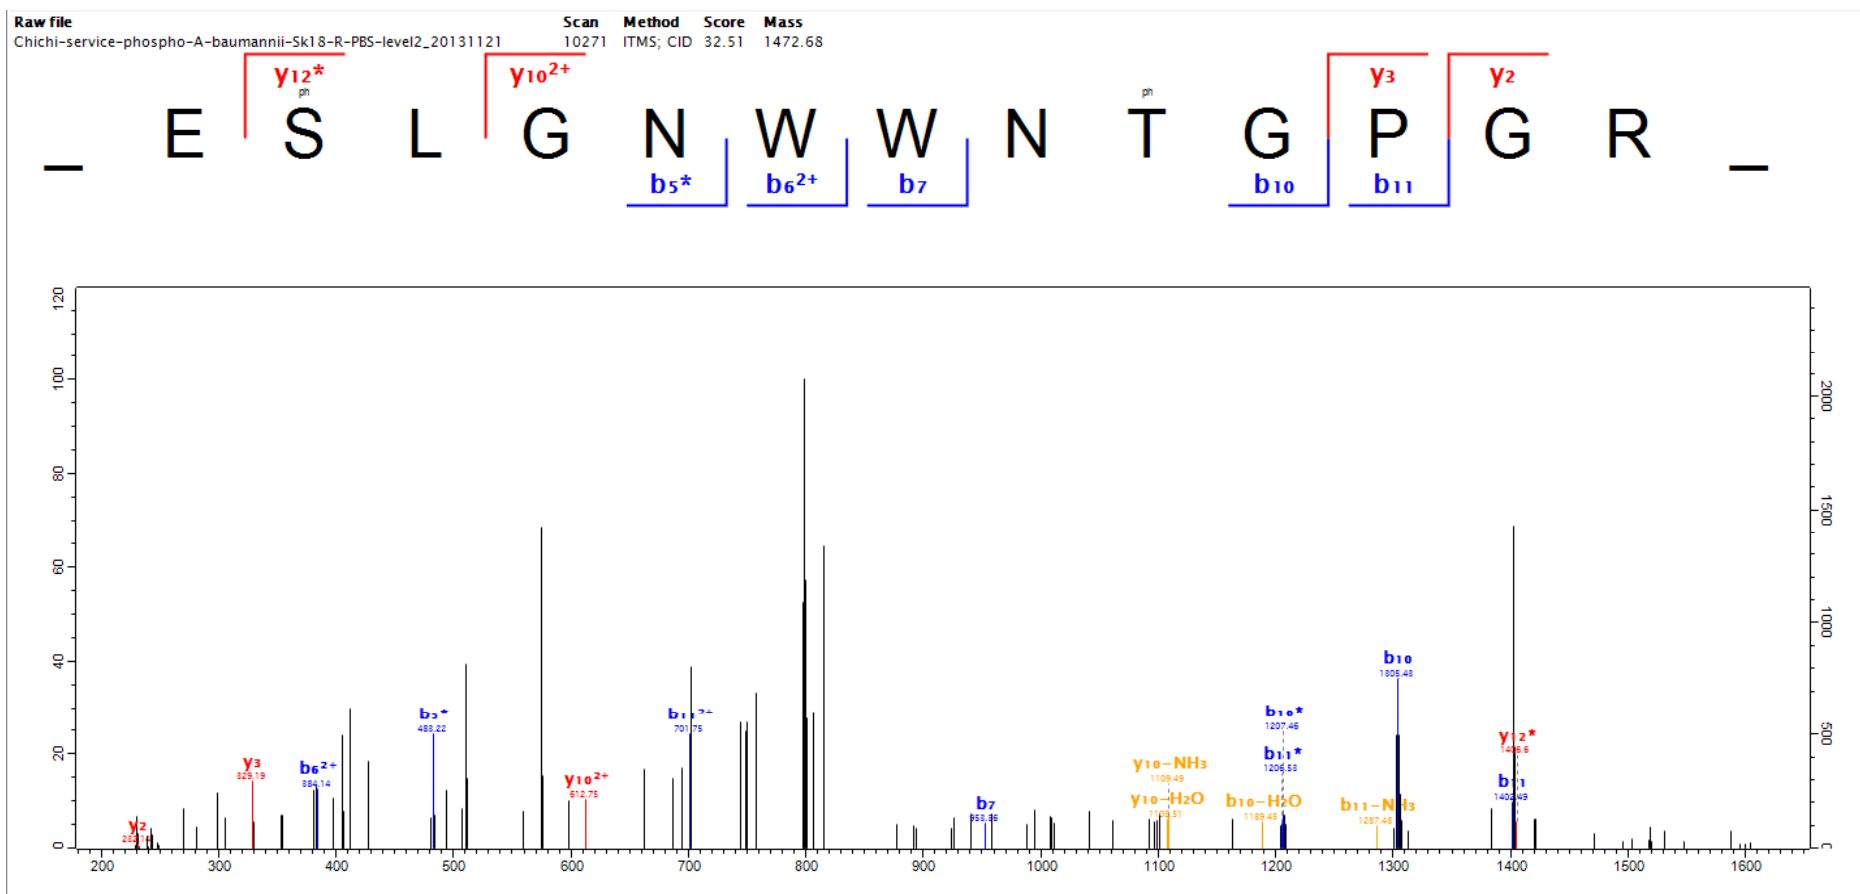

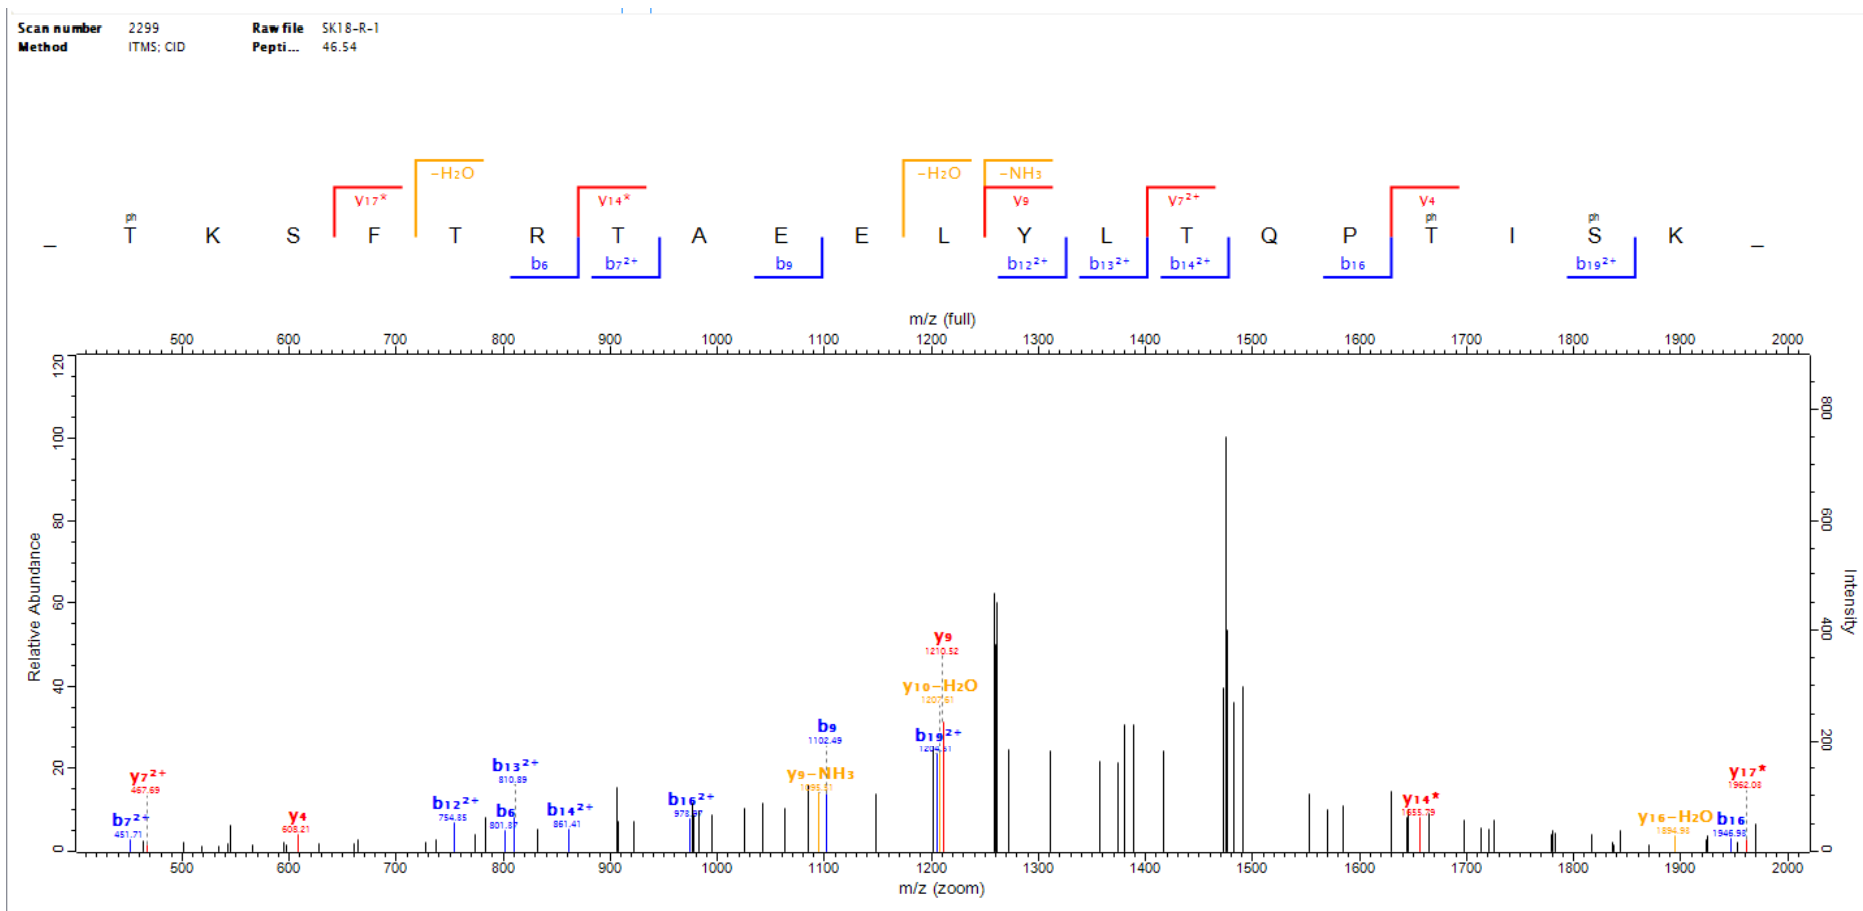

107

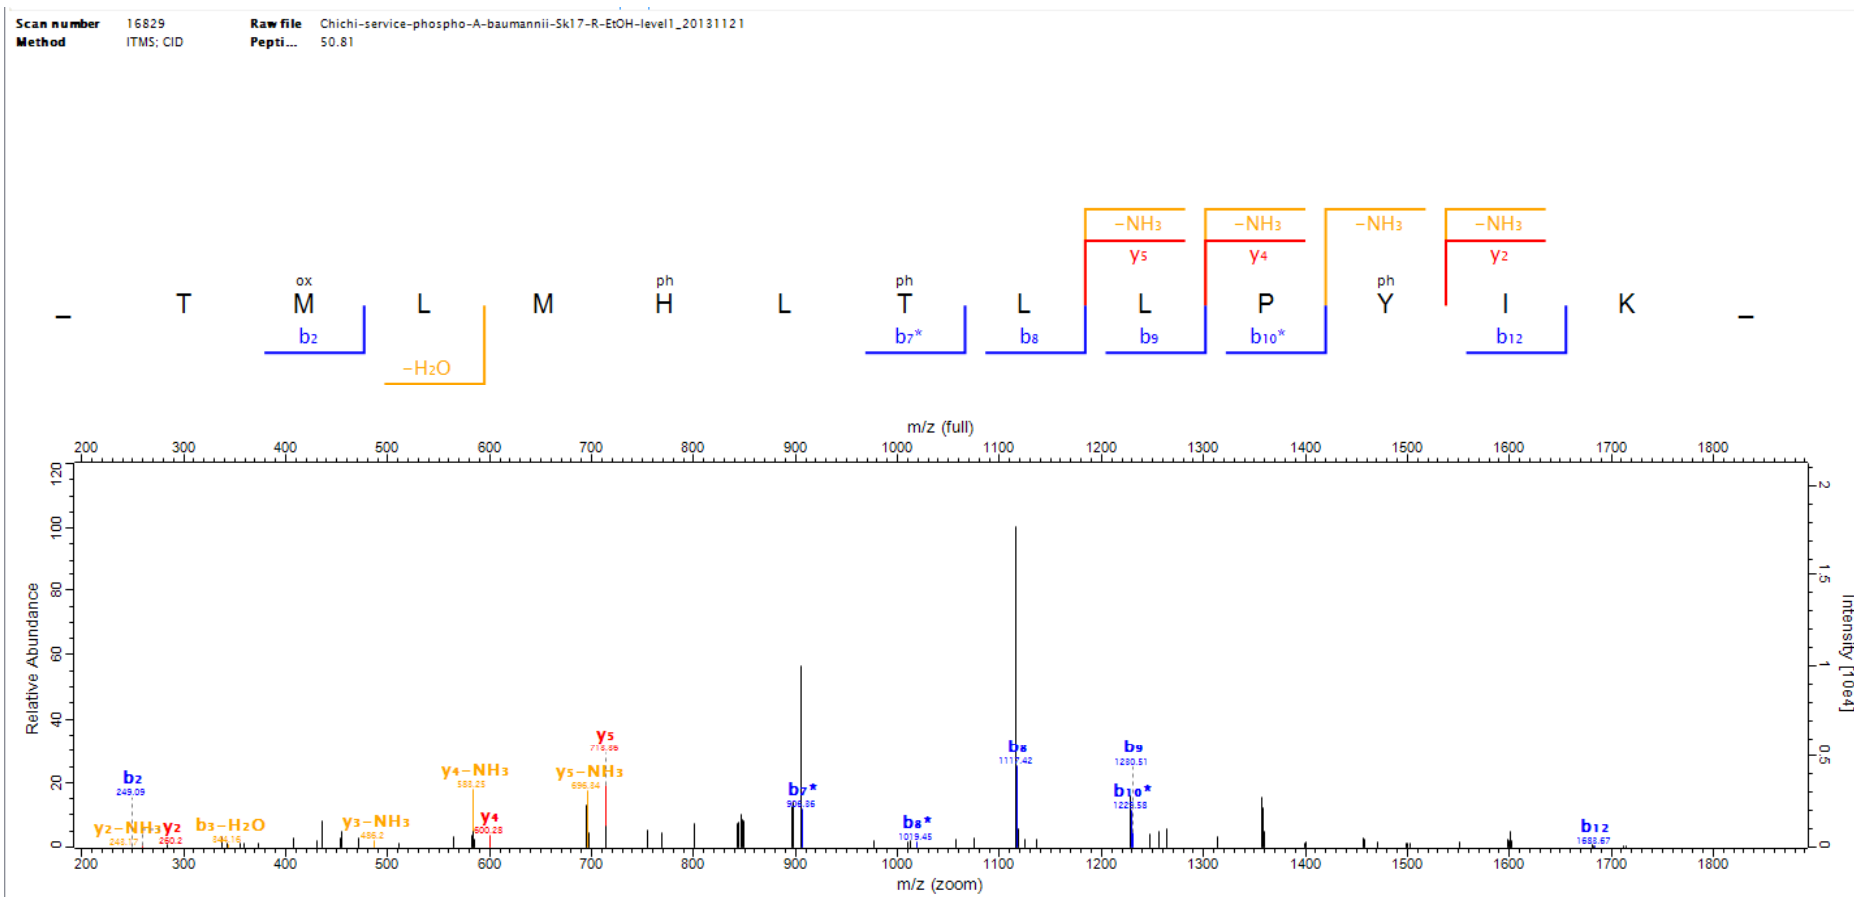

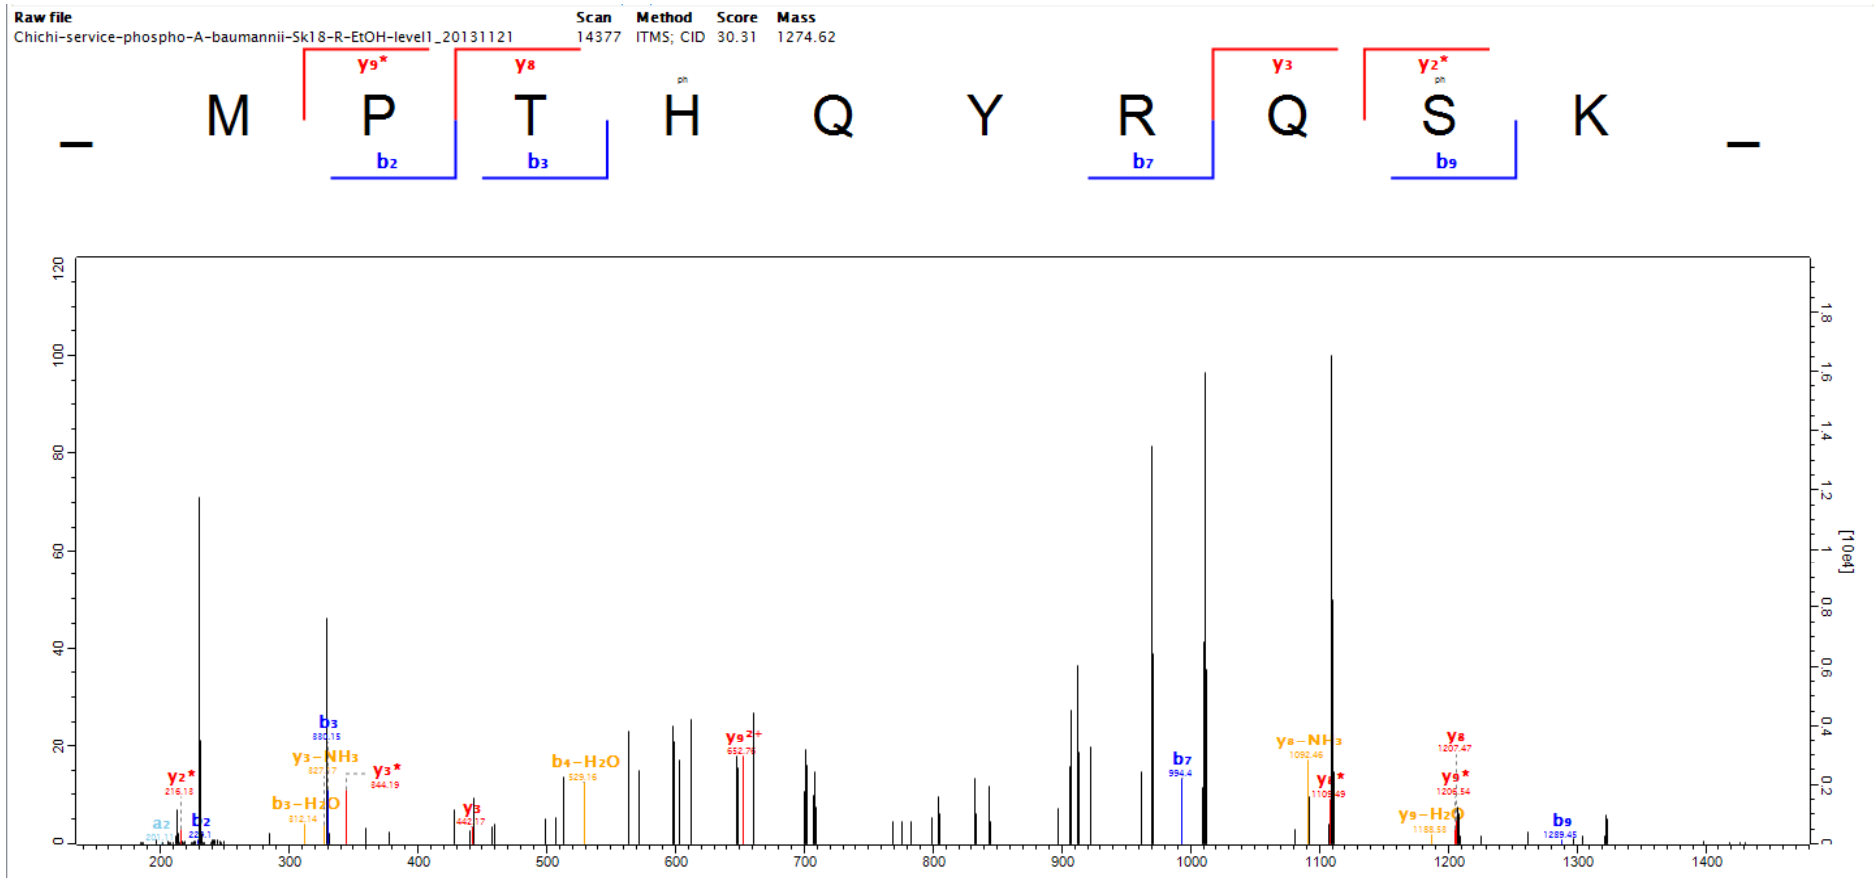

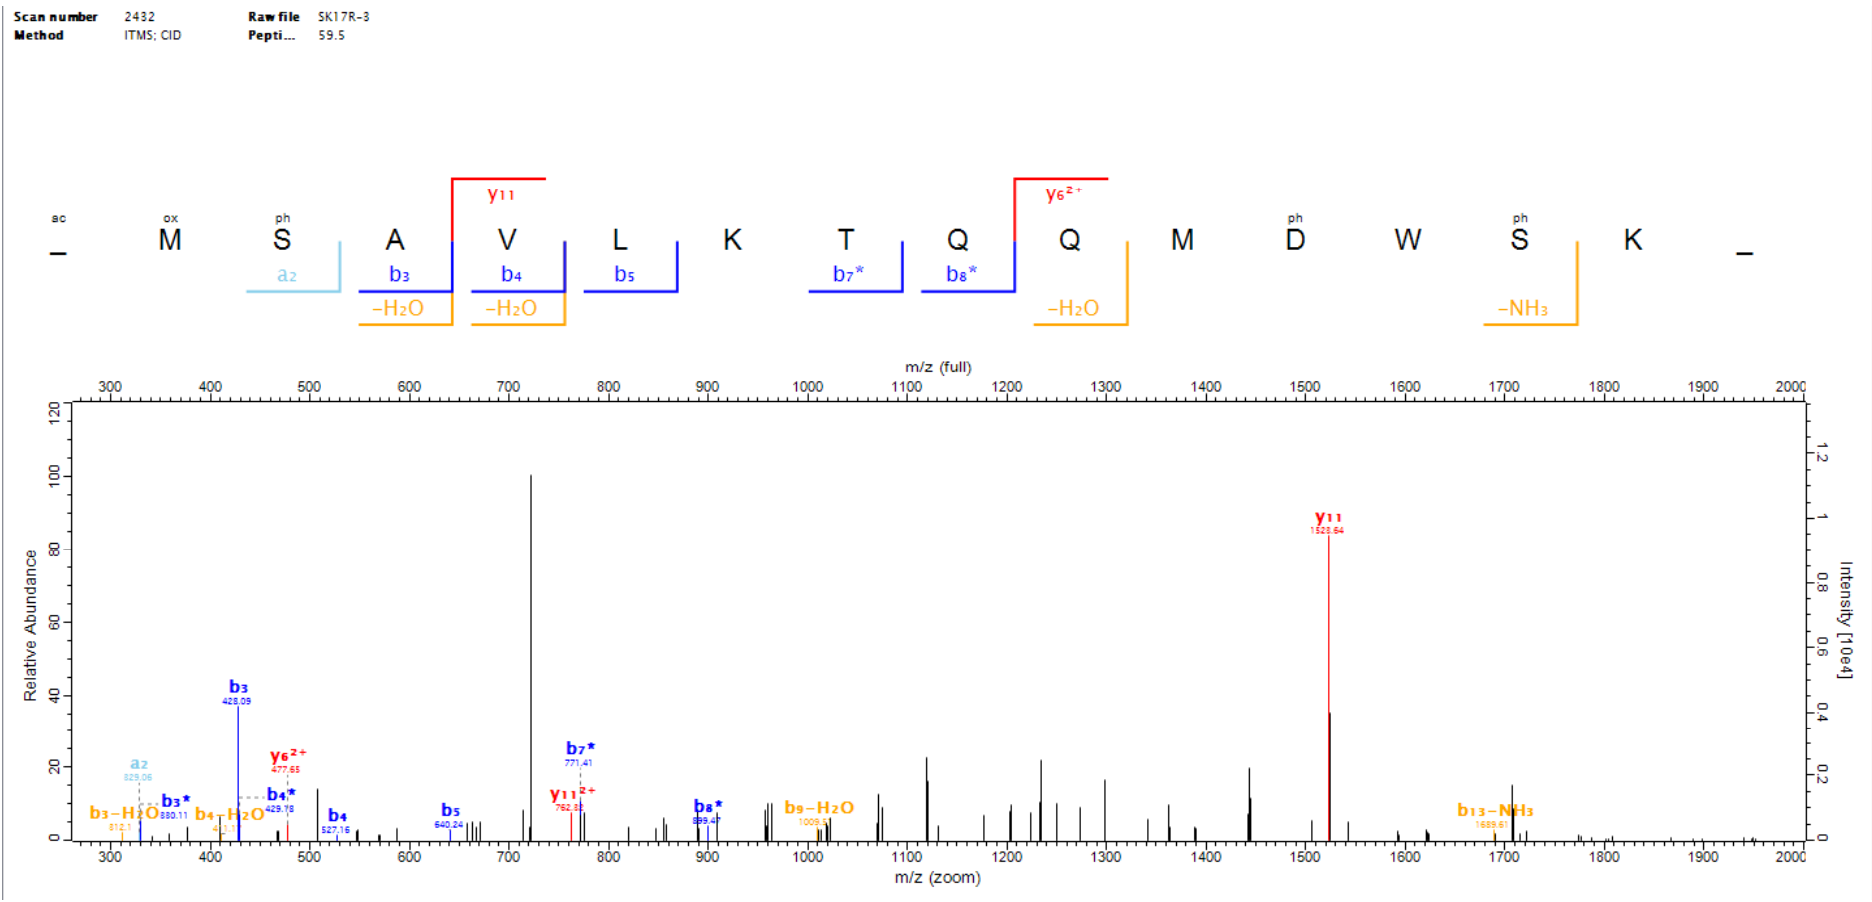

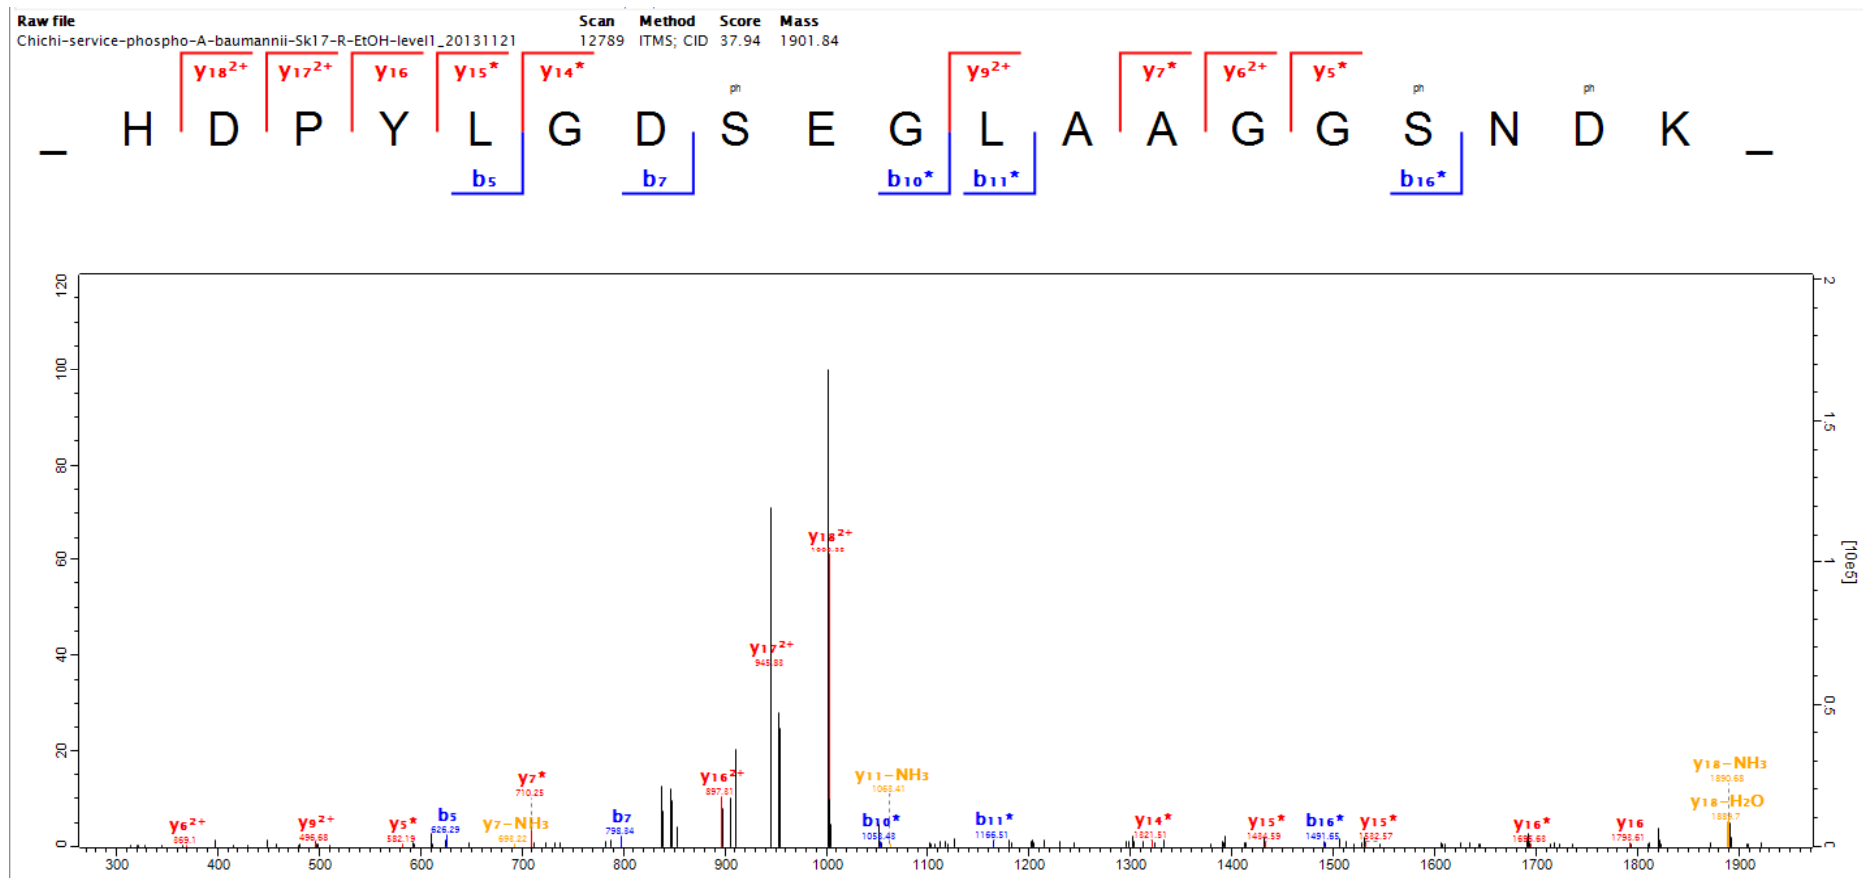



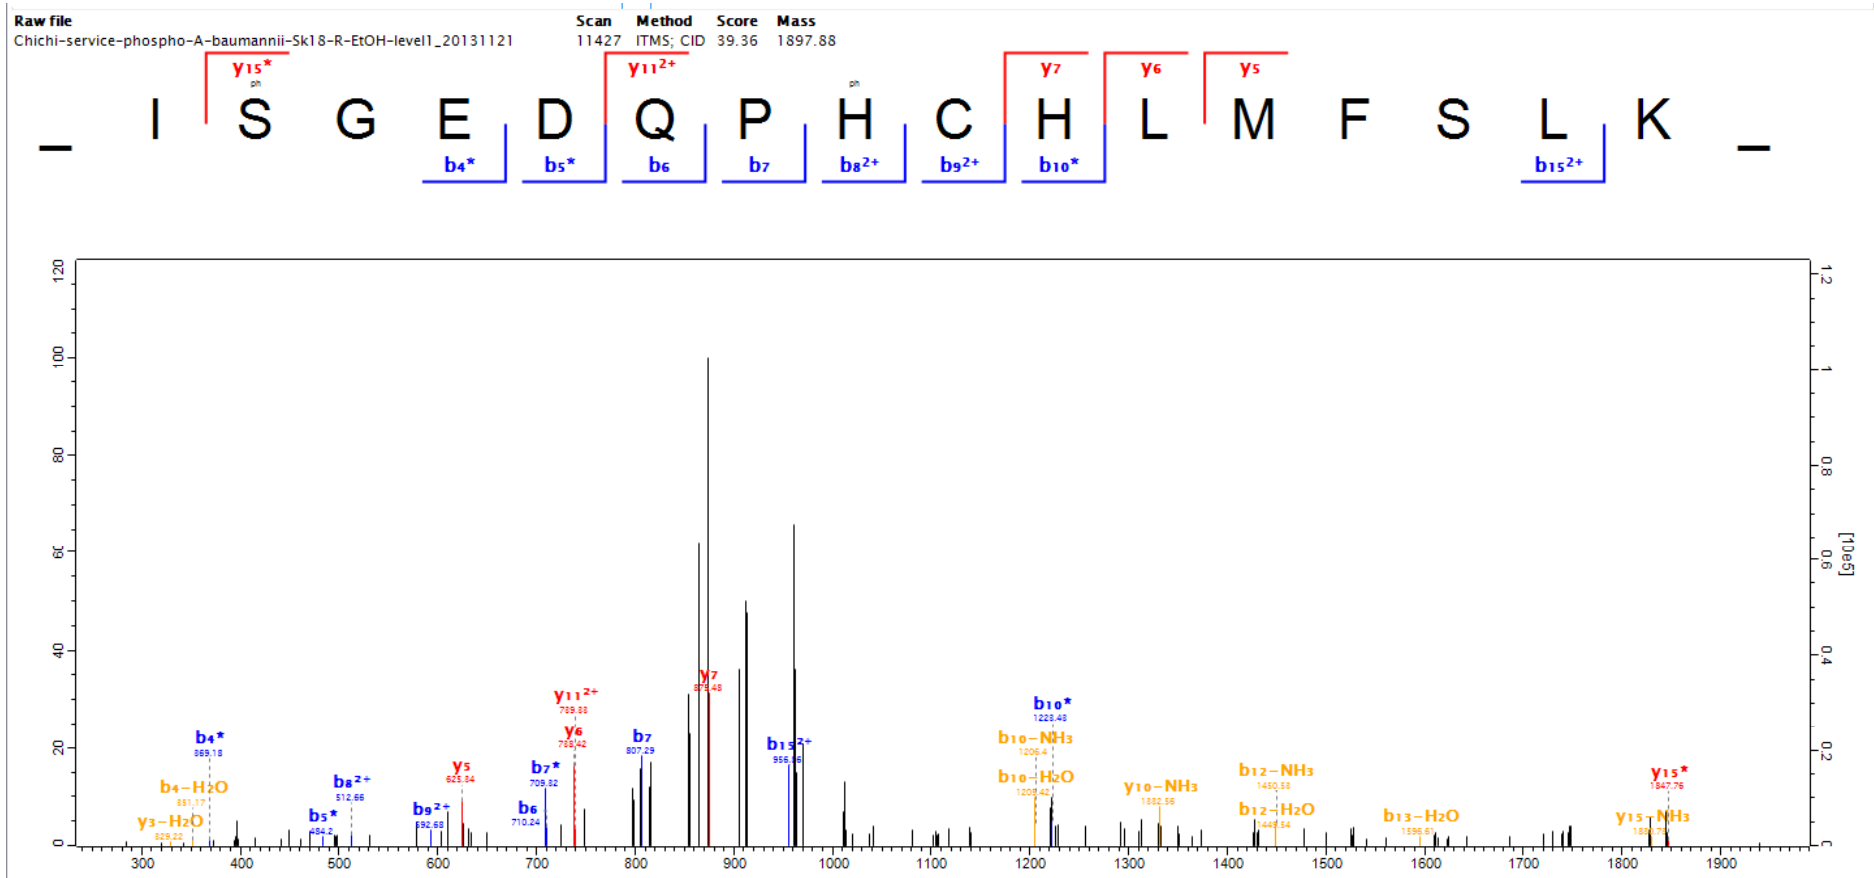

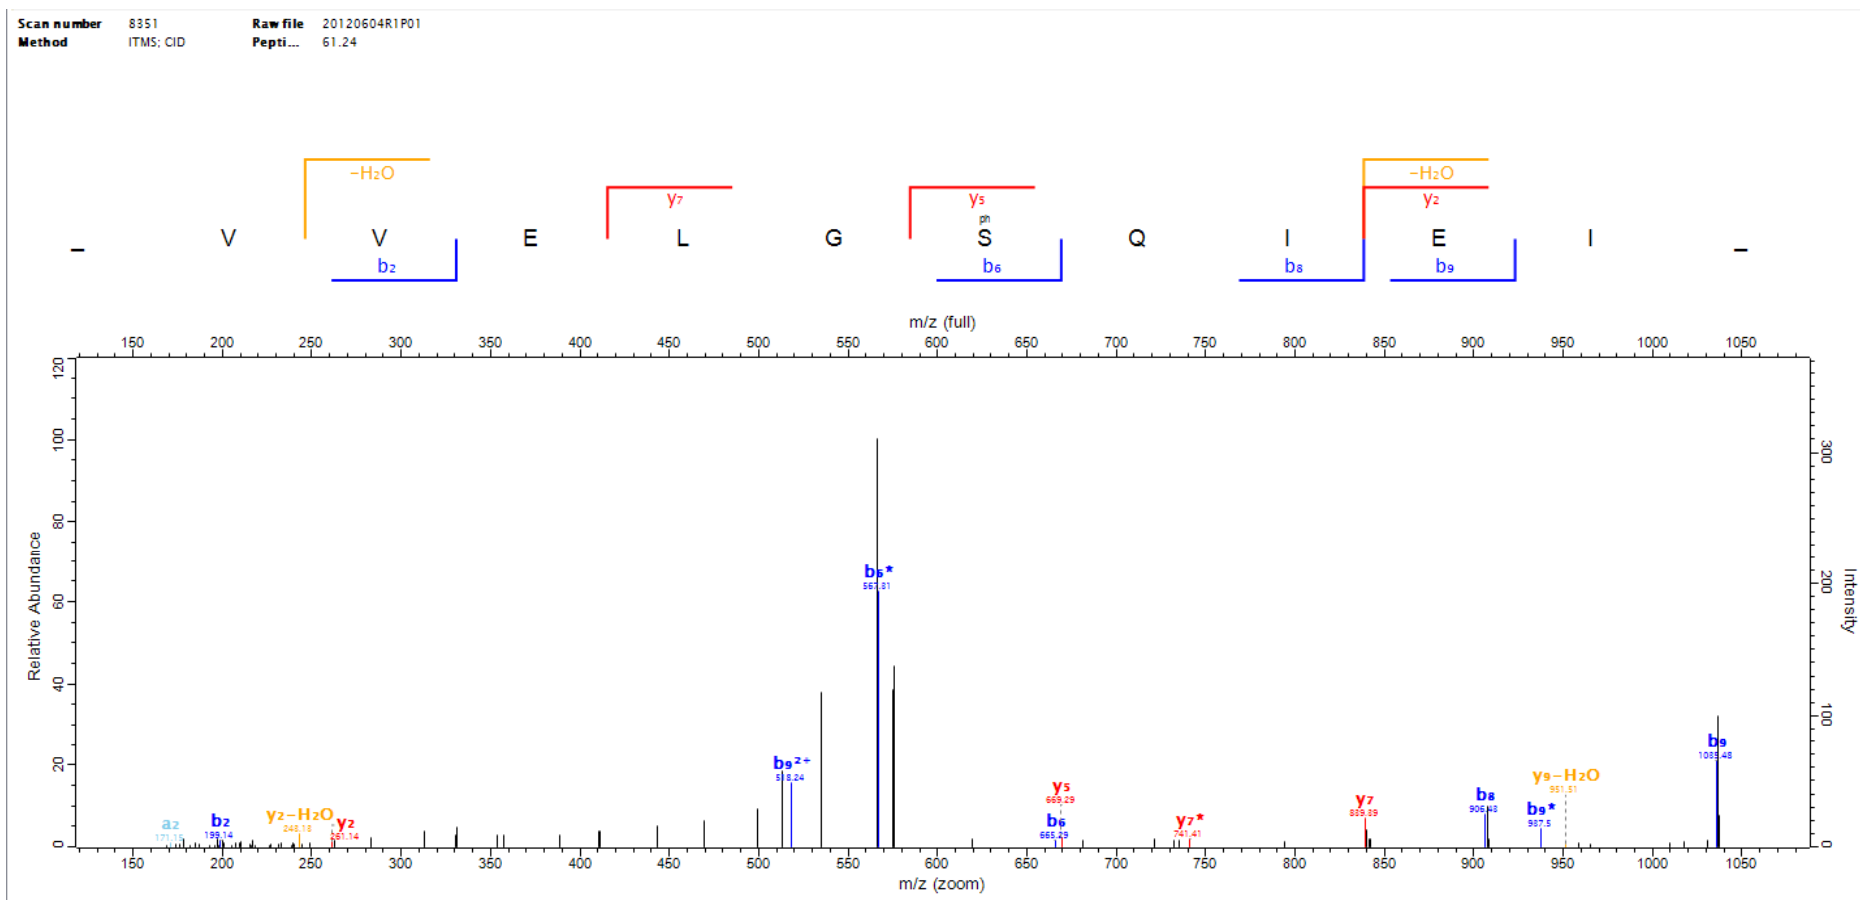

Scan number 7730 Raw file Chichi-service-phospho-A-baumannii-Skl 8-R-PBS-level2\_20131121  
 Method ITMS: CID Pepti... 54.28

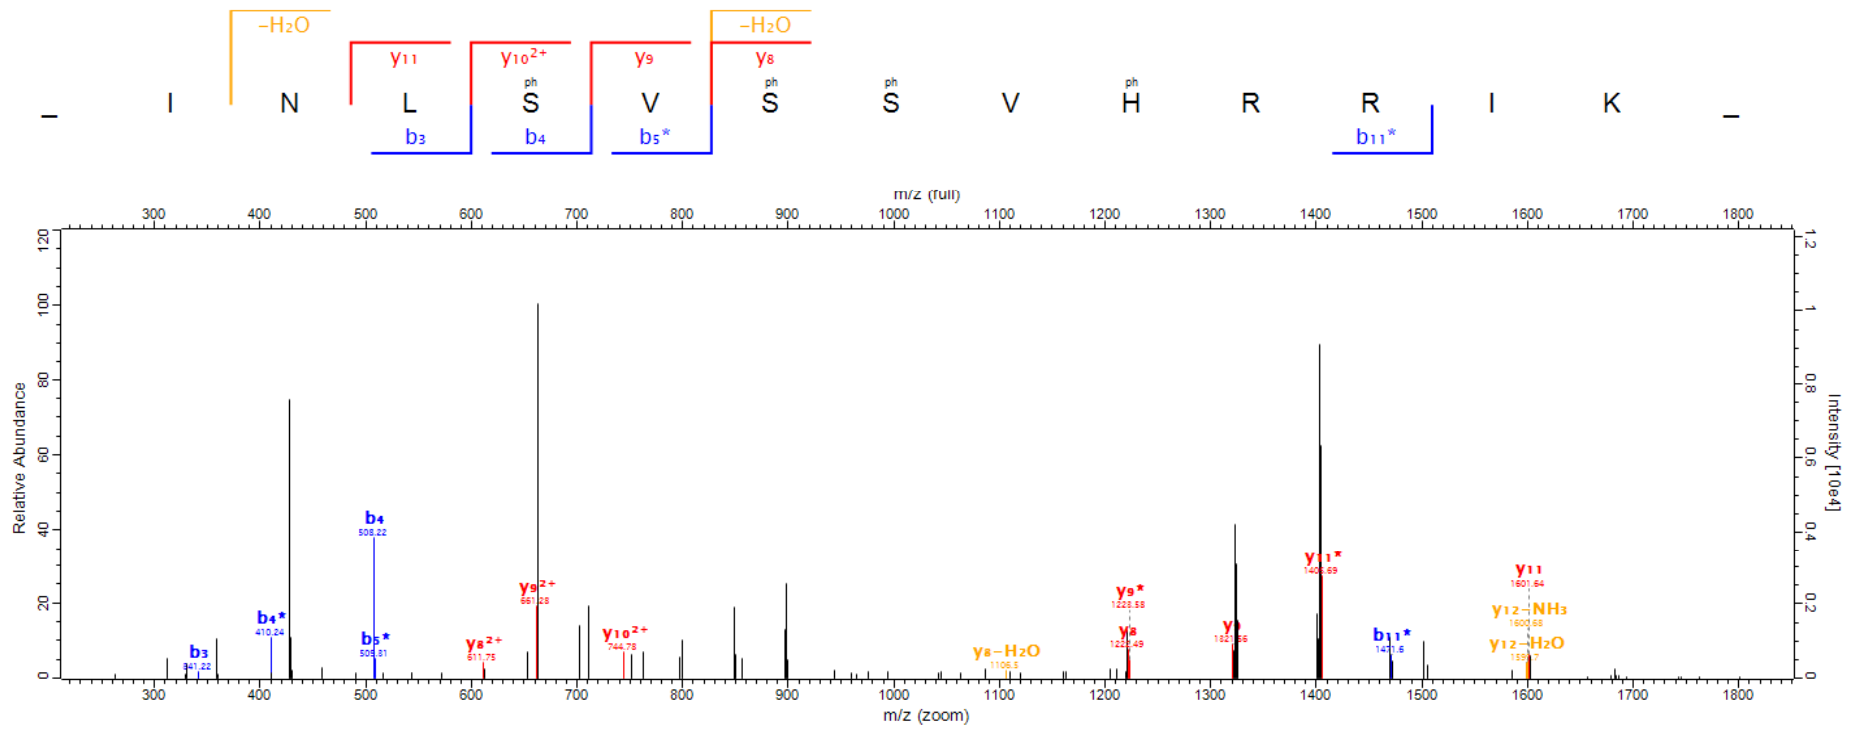

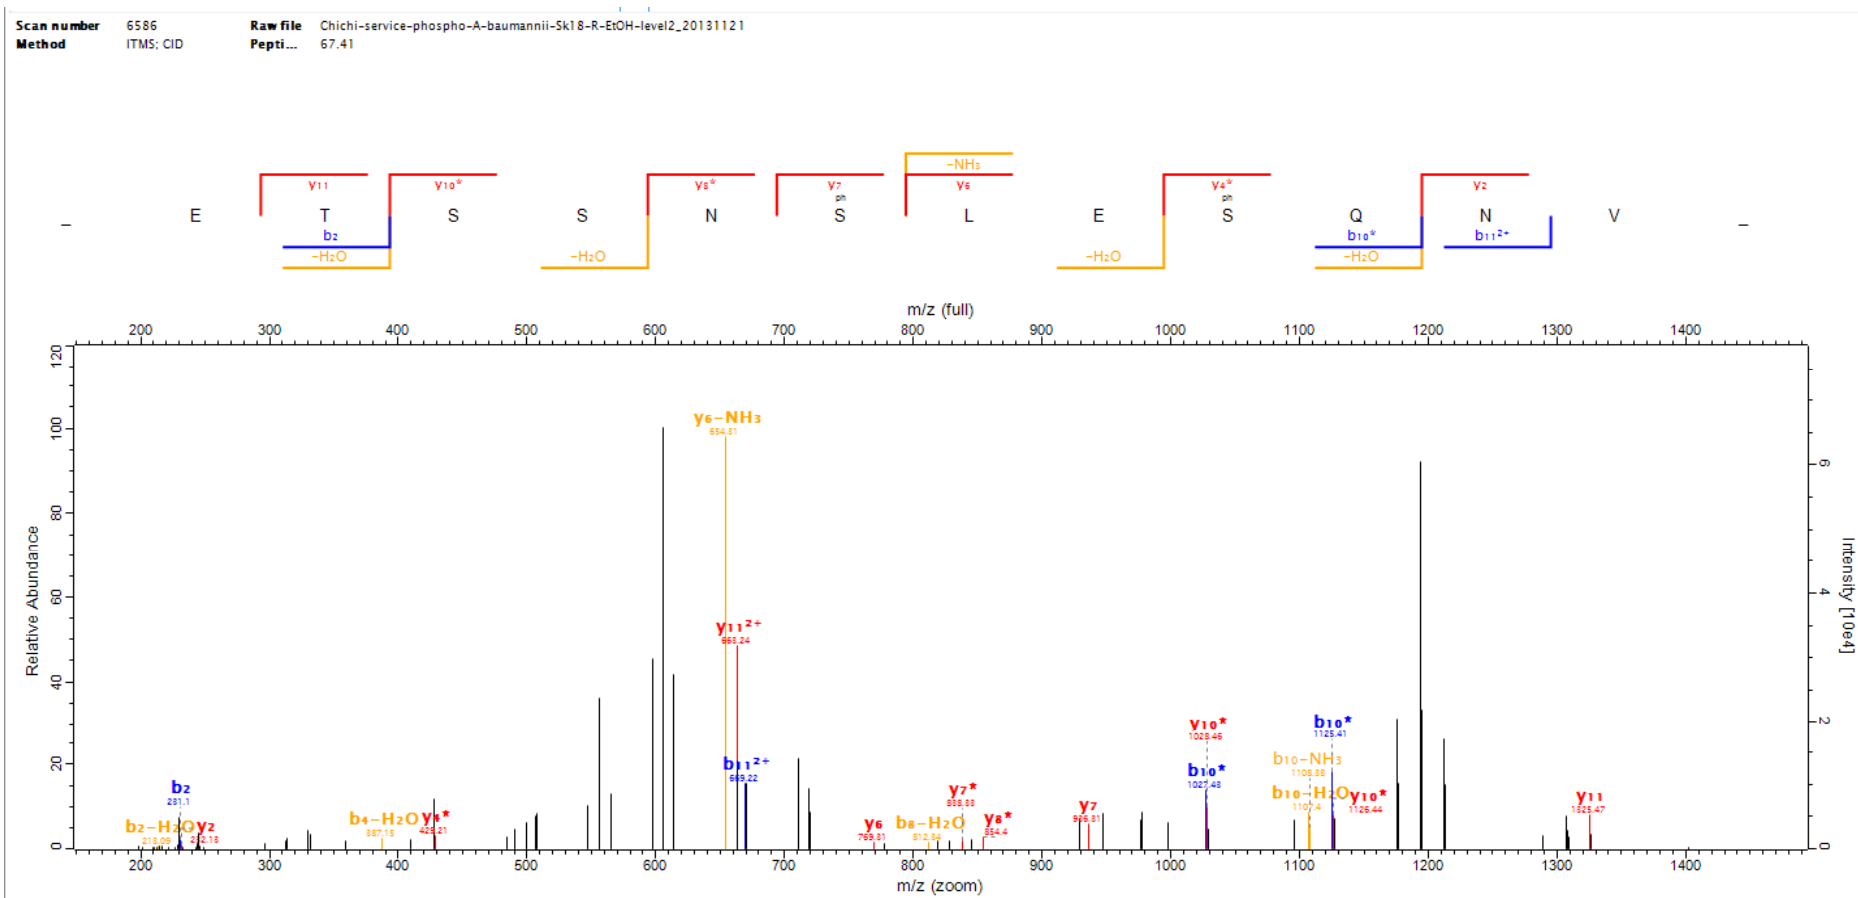

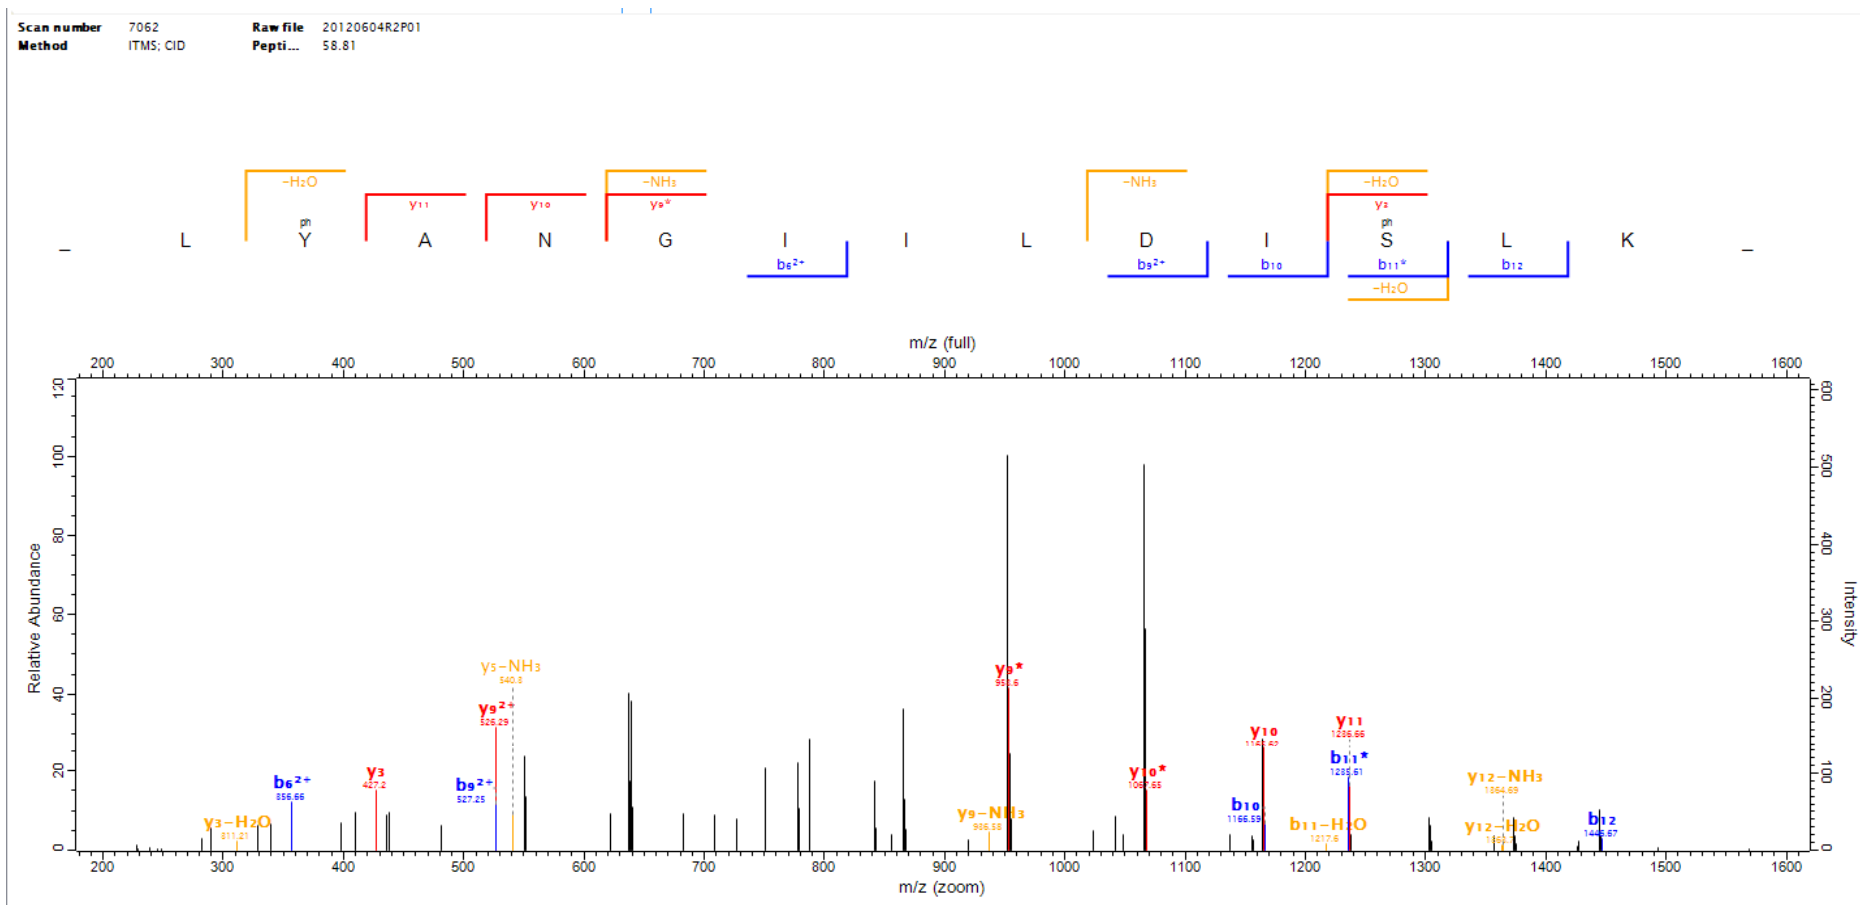

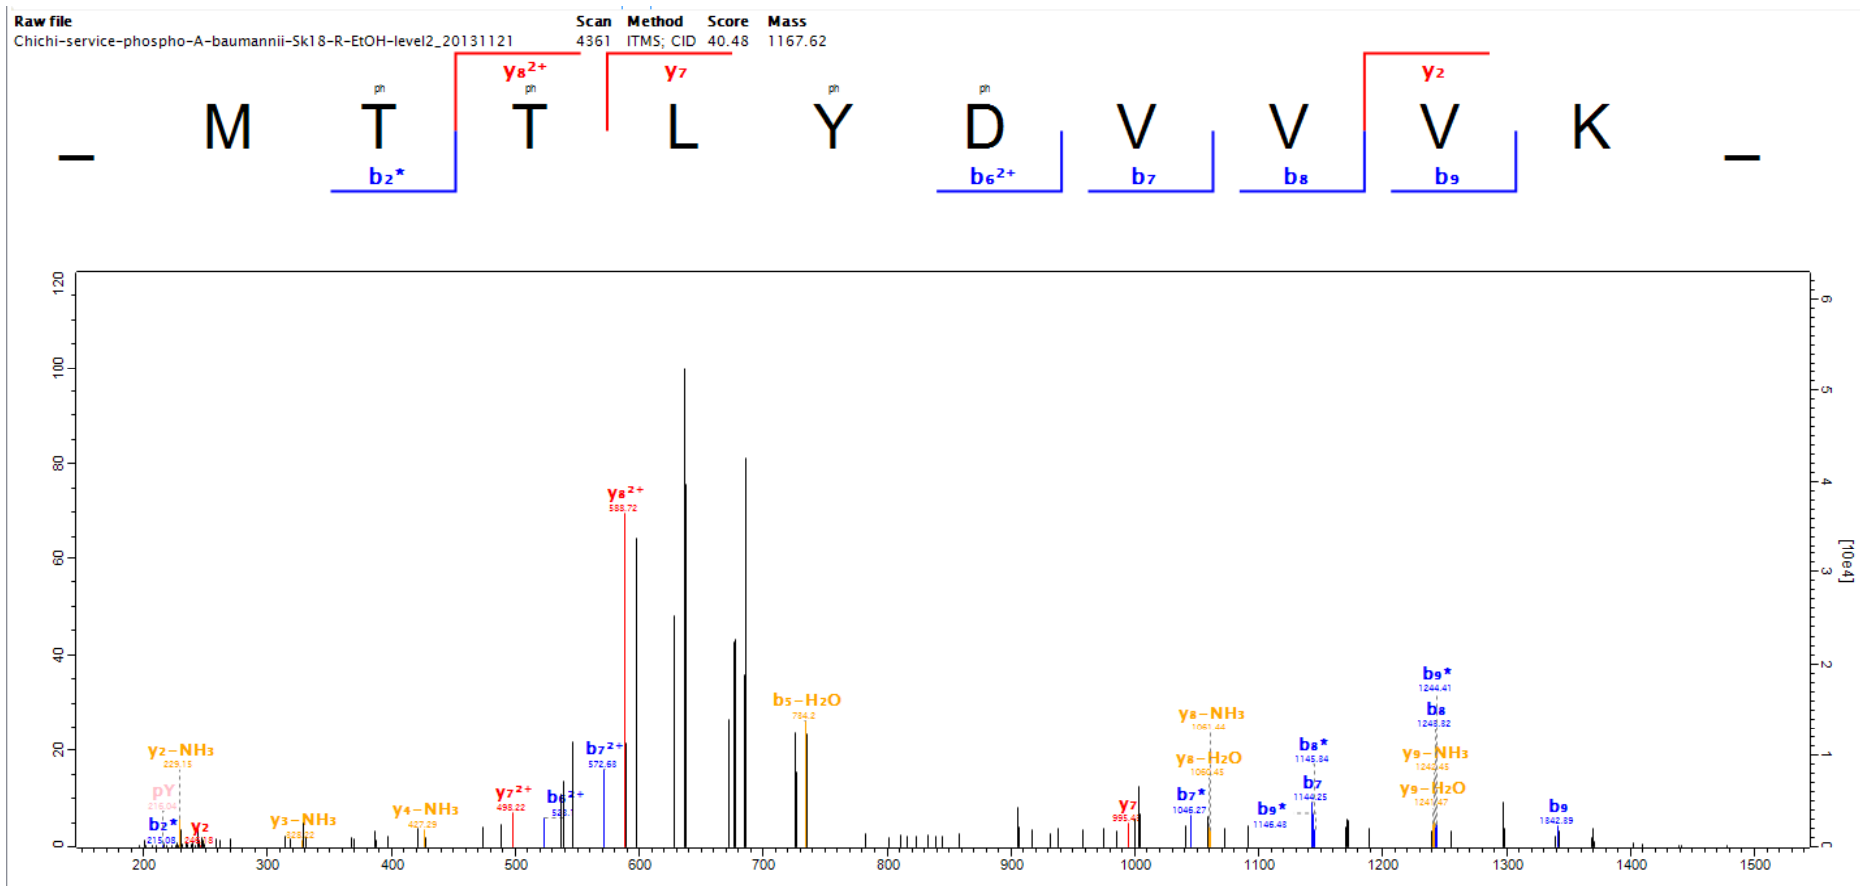

Scan number 3450 Raw file Chichi-service-phospho-A-baumannii-Sk1 8-R-PBS-level2\_20131121  
 Method ITMS: CID Pepti... 61.18

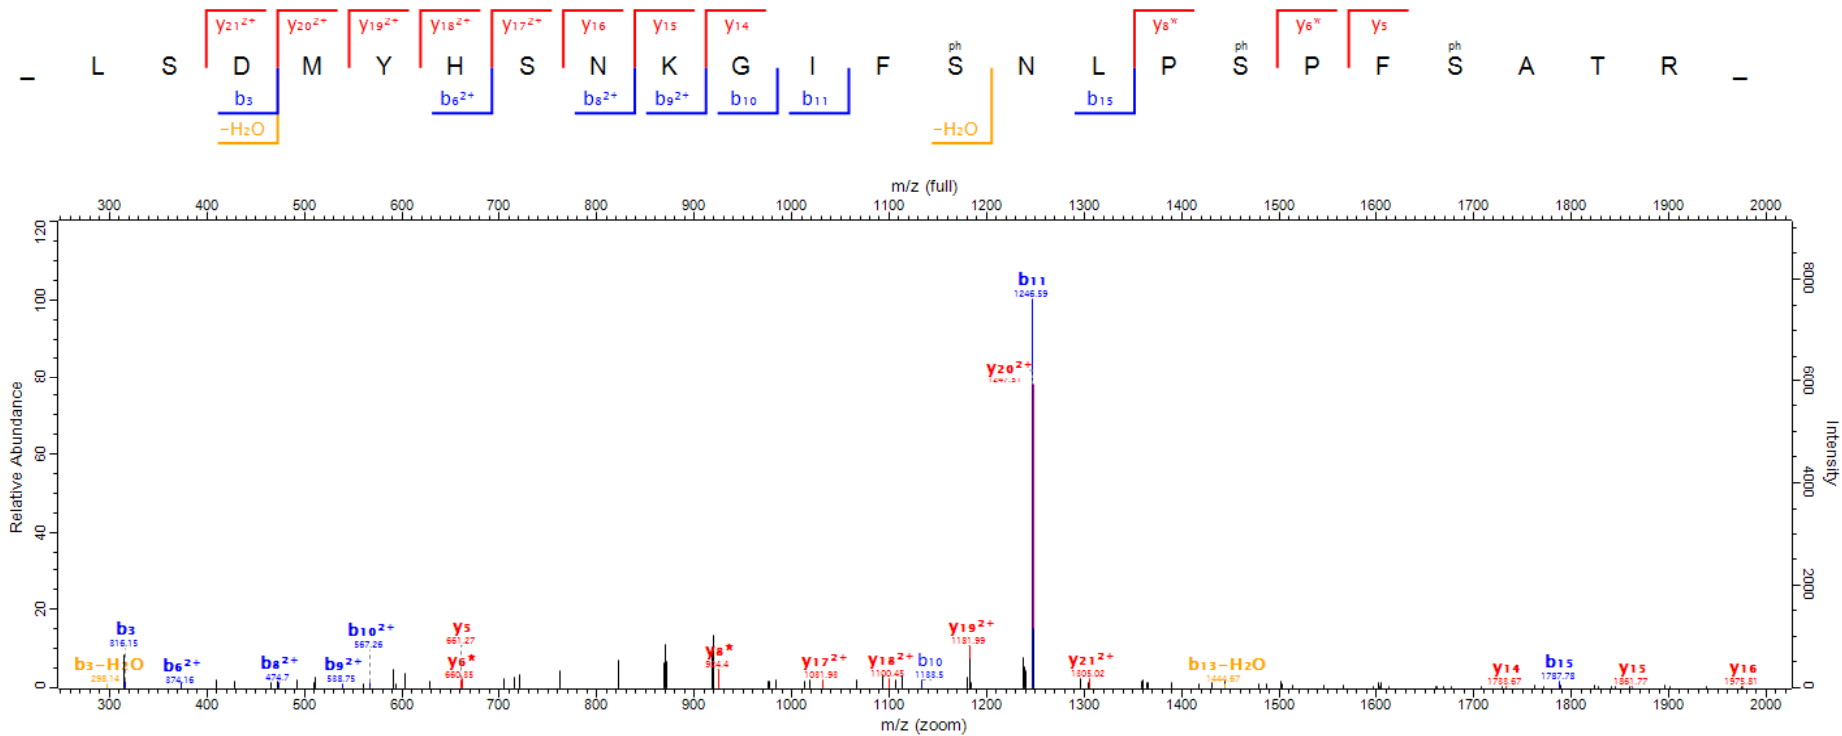

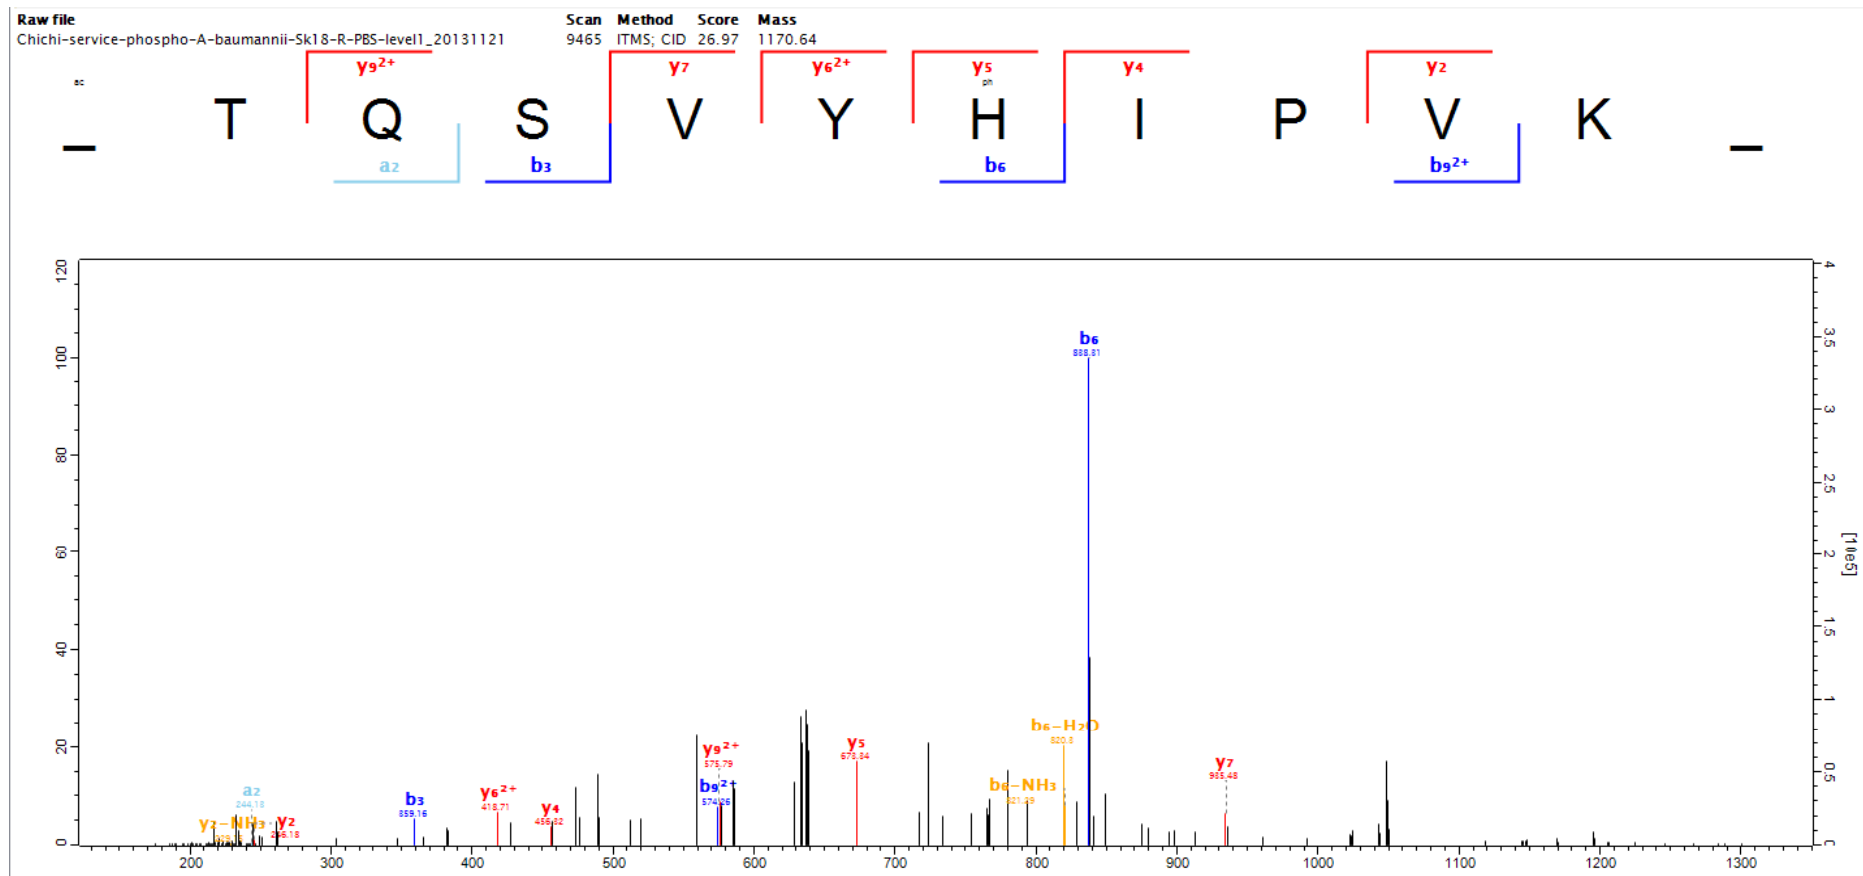



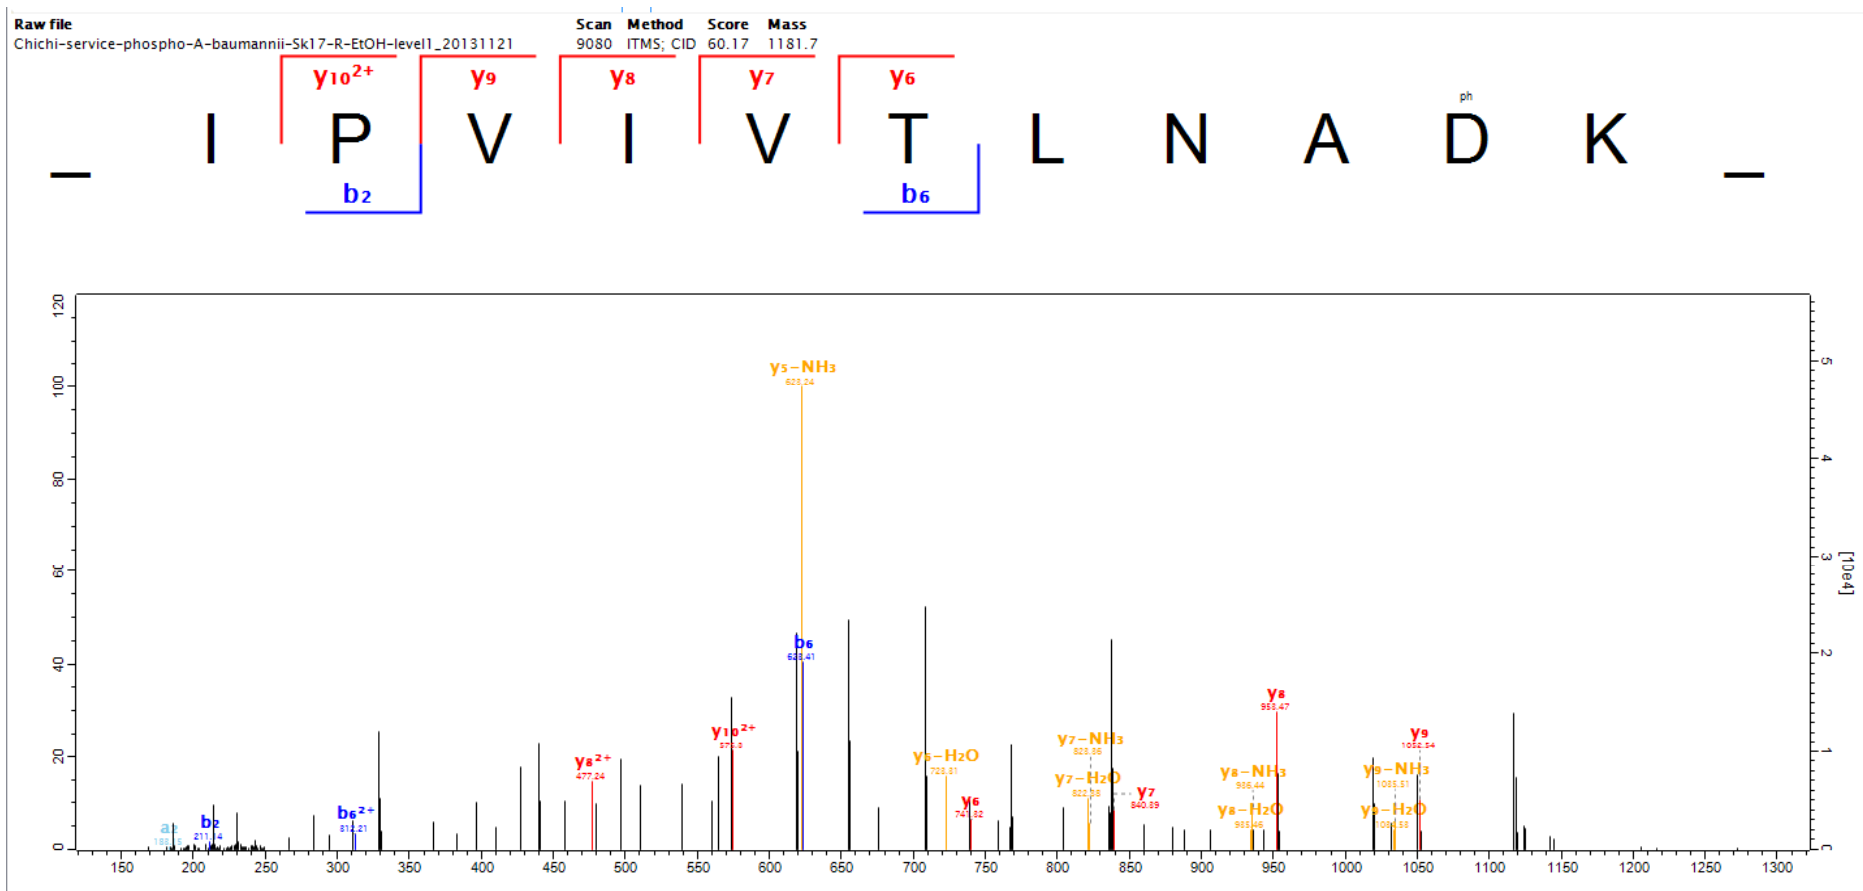

120

Scan number 6359 Raw file Chichi-service-phospho-A-baumannii-Sk18-R-PBS-level2\_20131121  
 Method ITMS; CID Pepti... 36.45

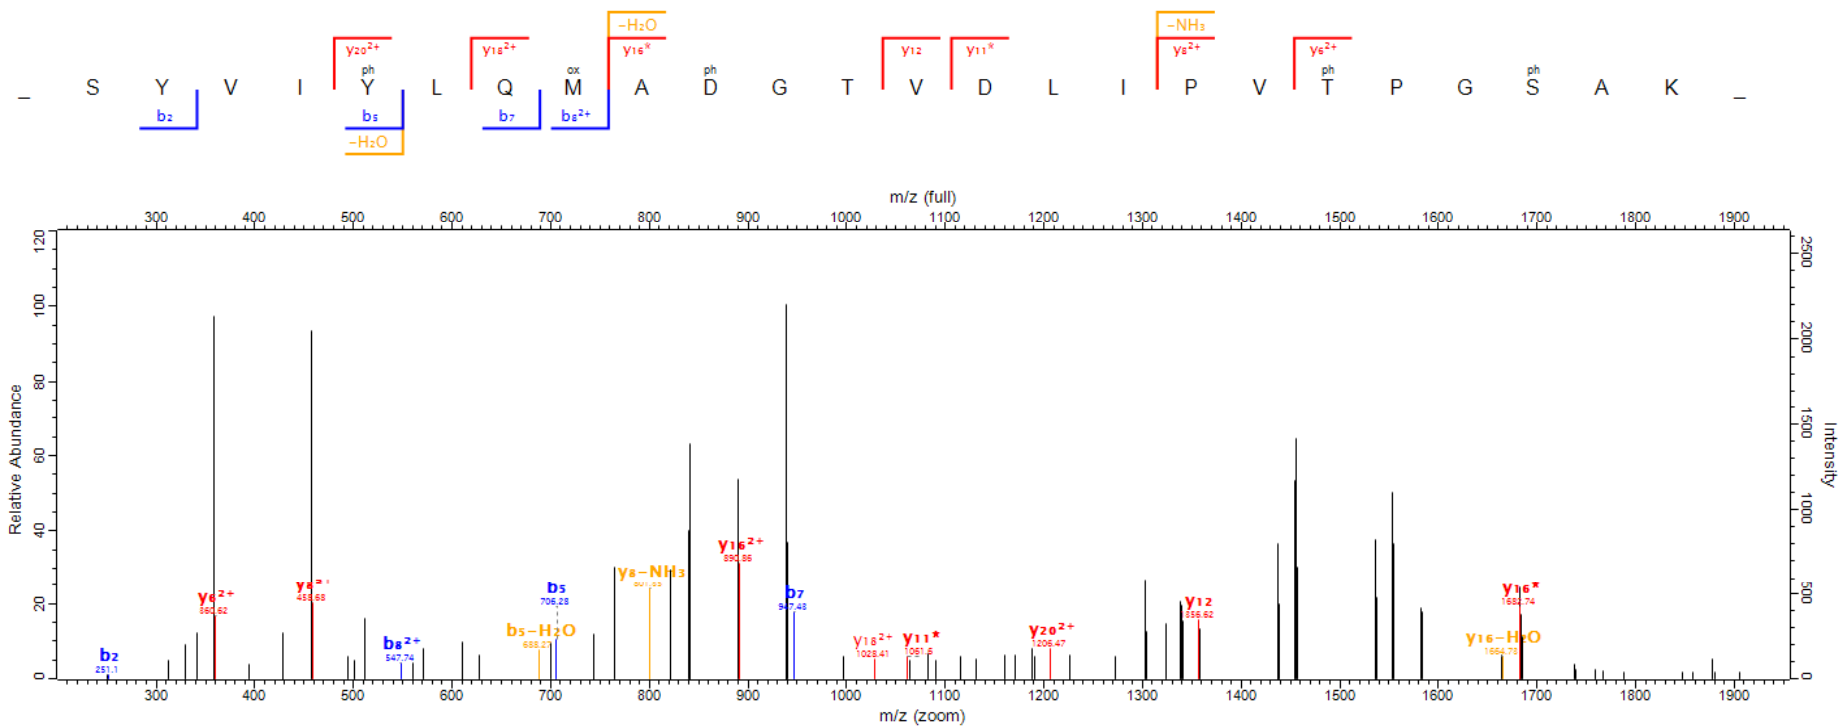

121-1

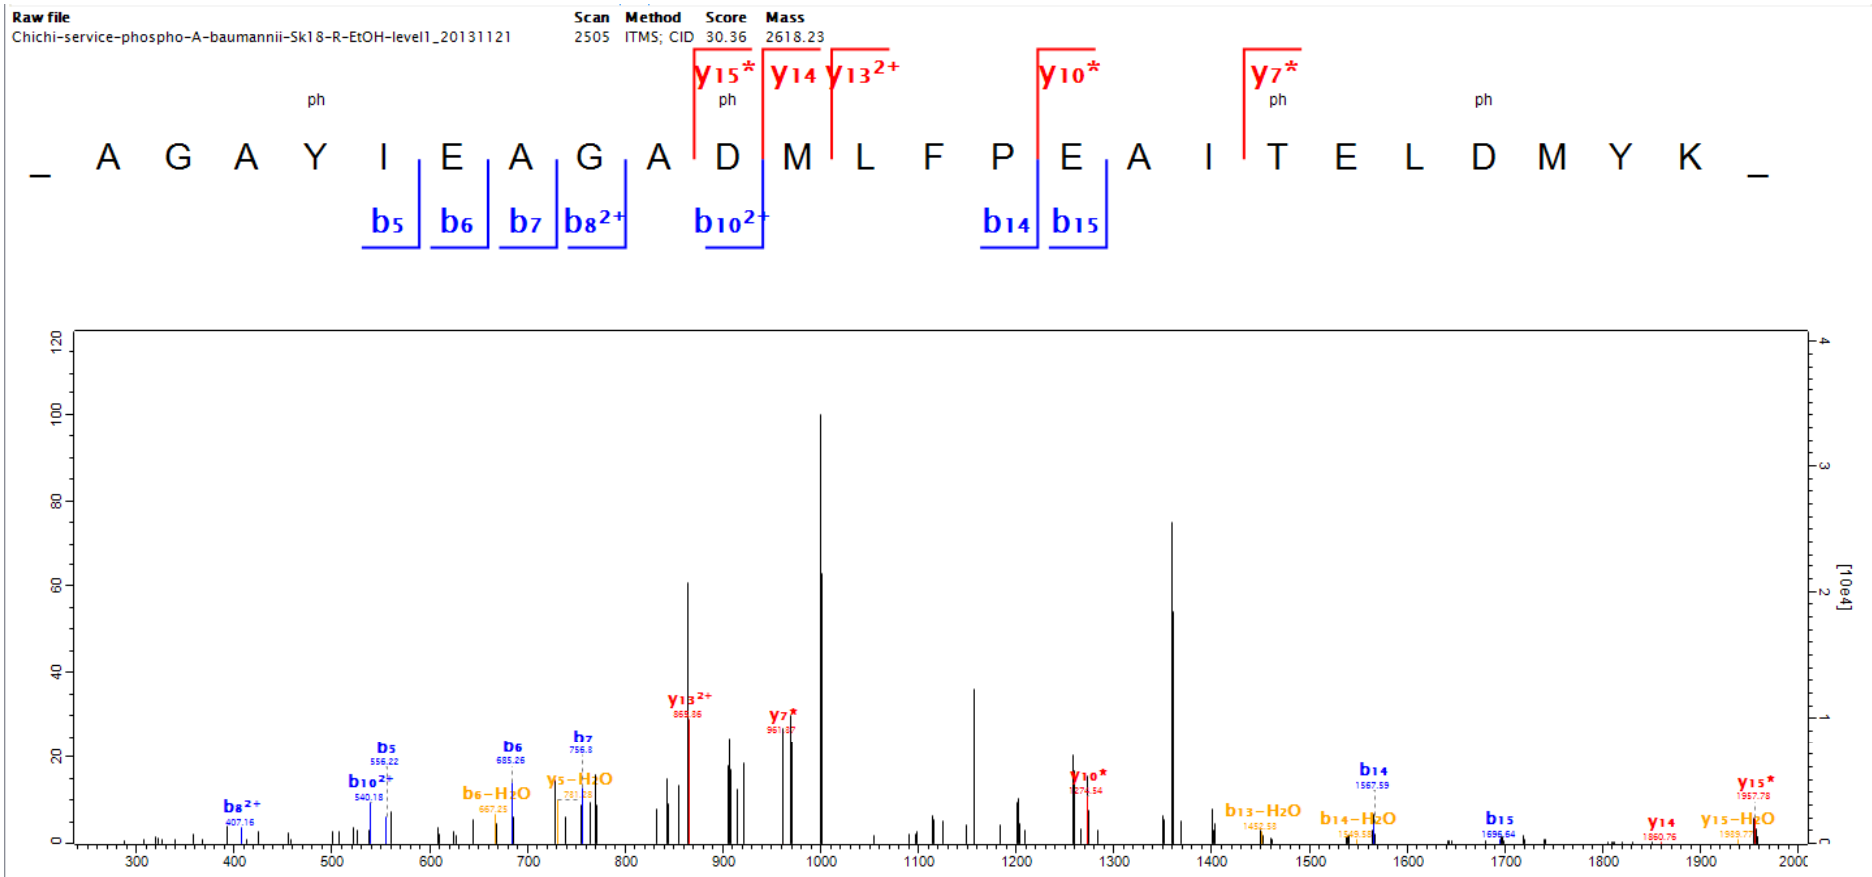

121-2

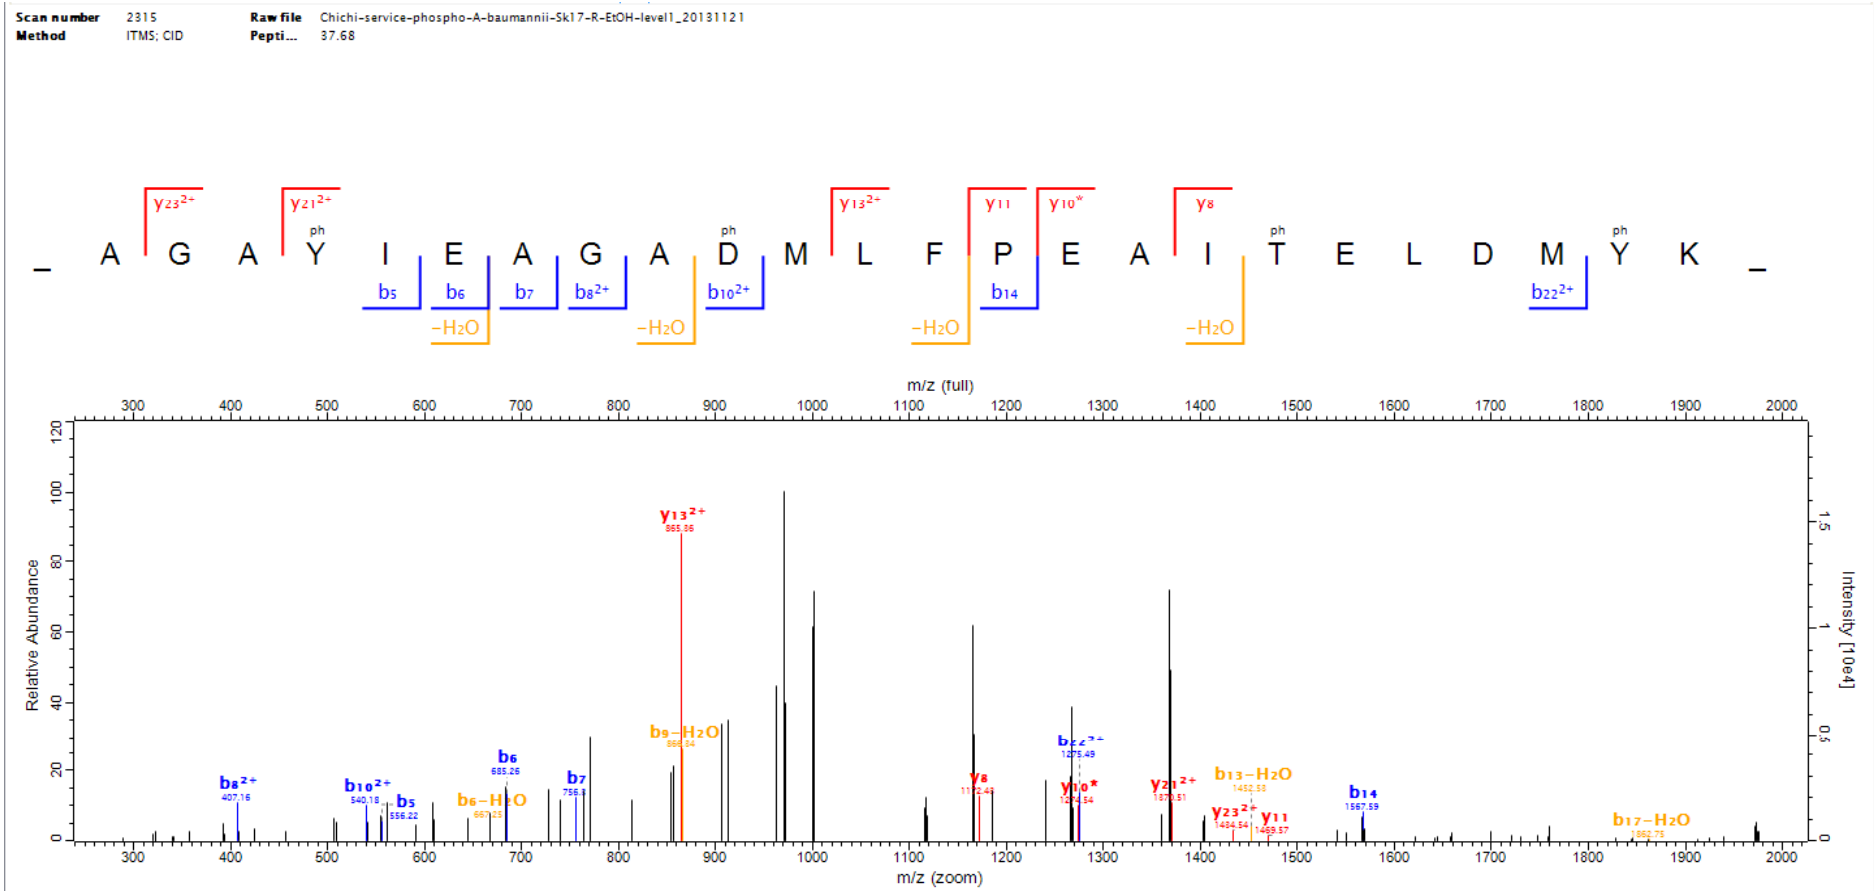

122

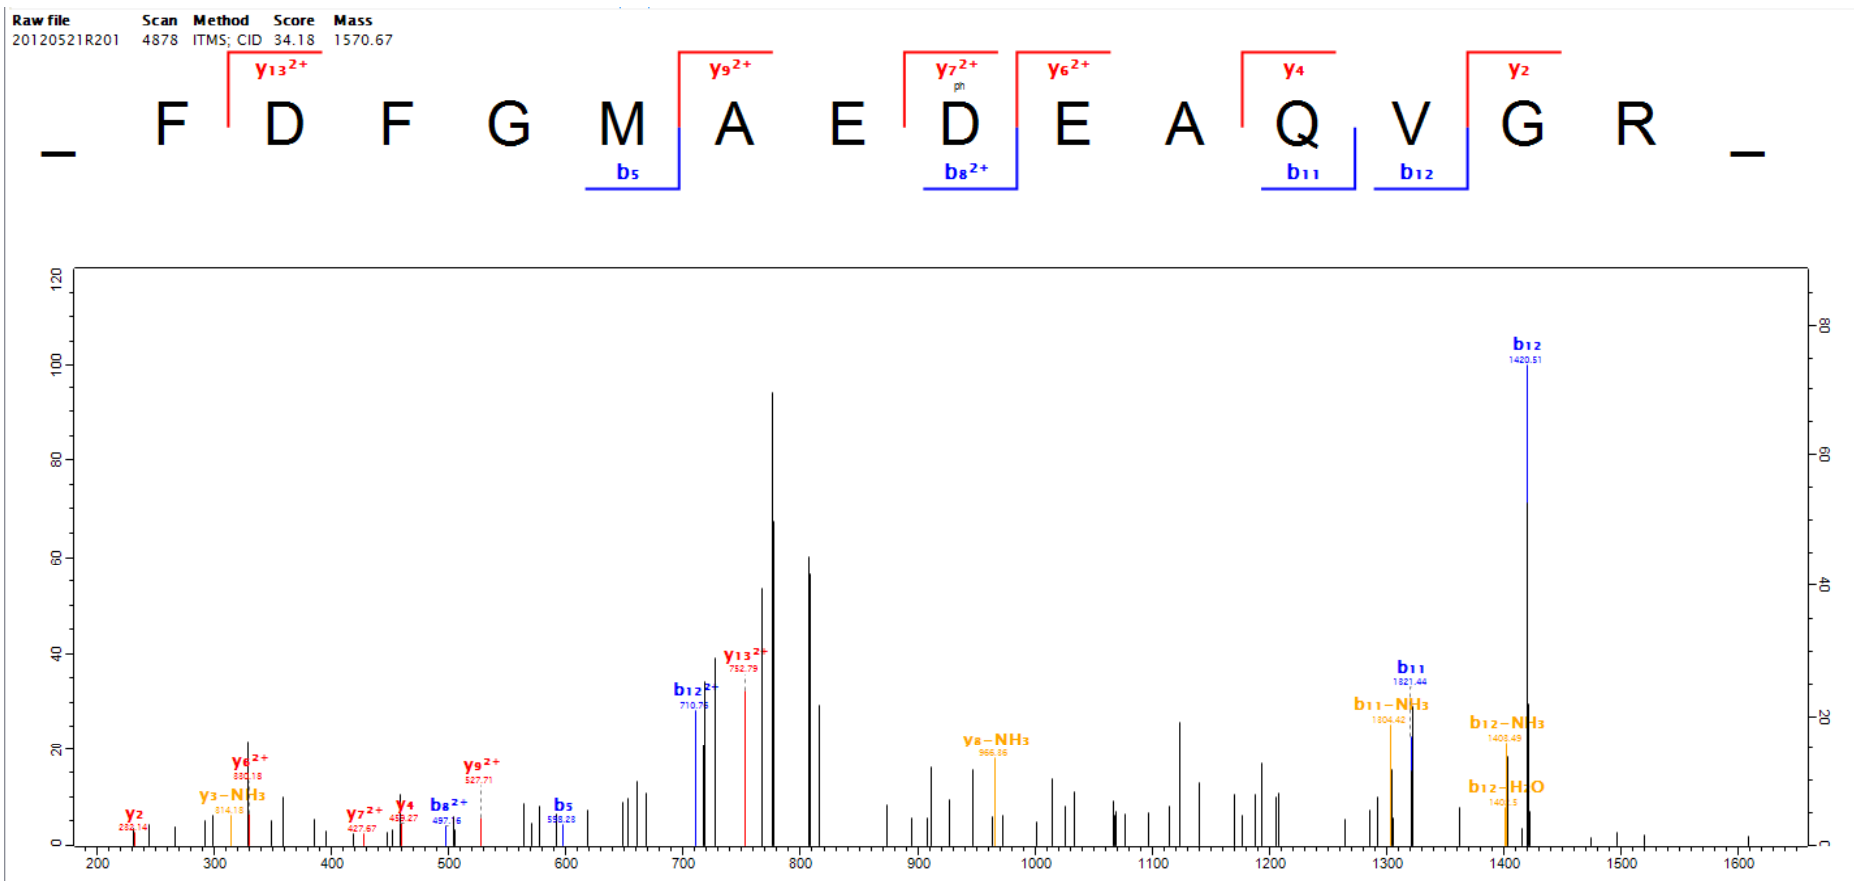

Scan number 2704 Raw file SK18R-2  
 Method ITMS: CID Pepti... 53.17

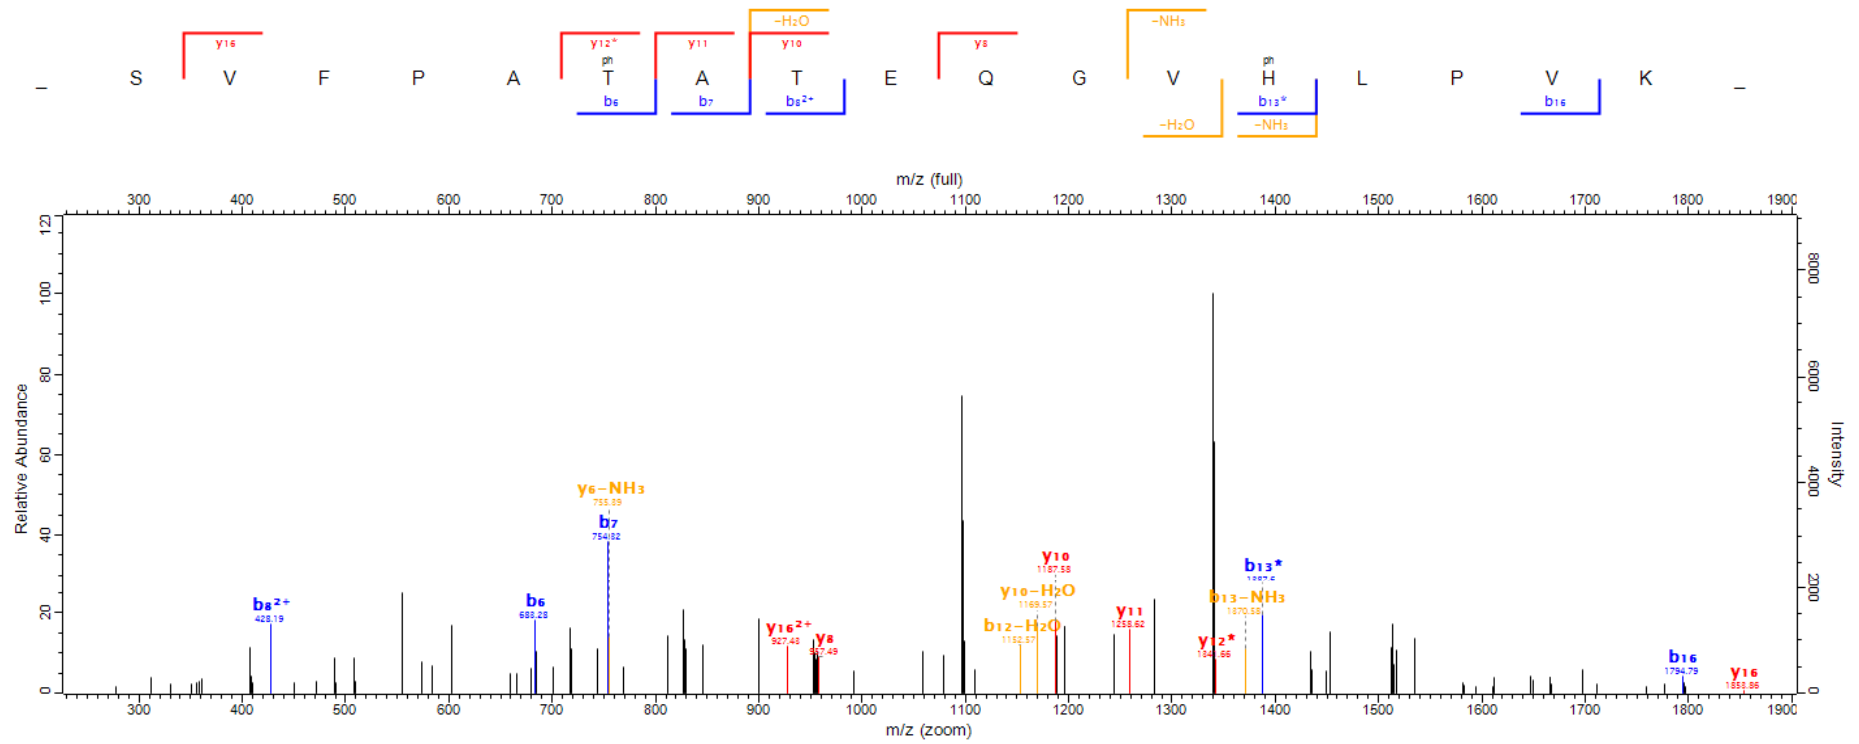

124-1

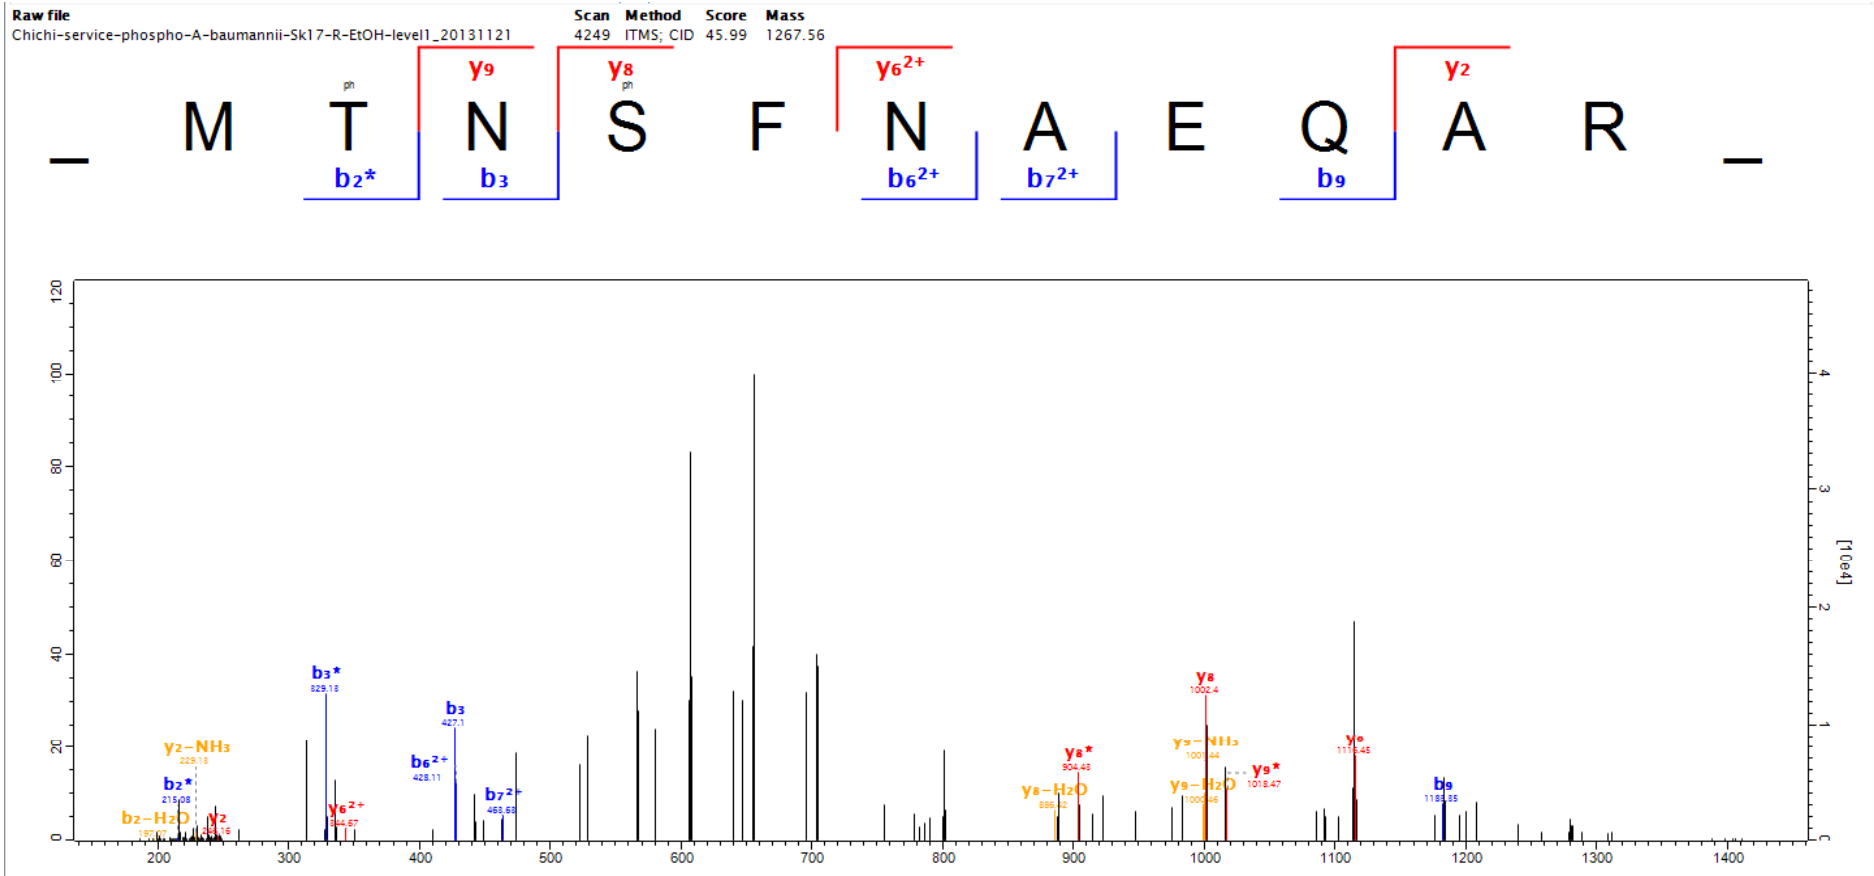

124-2

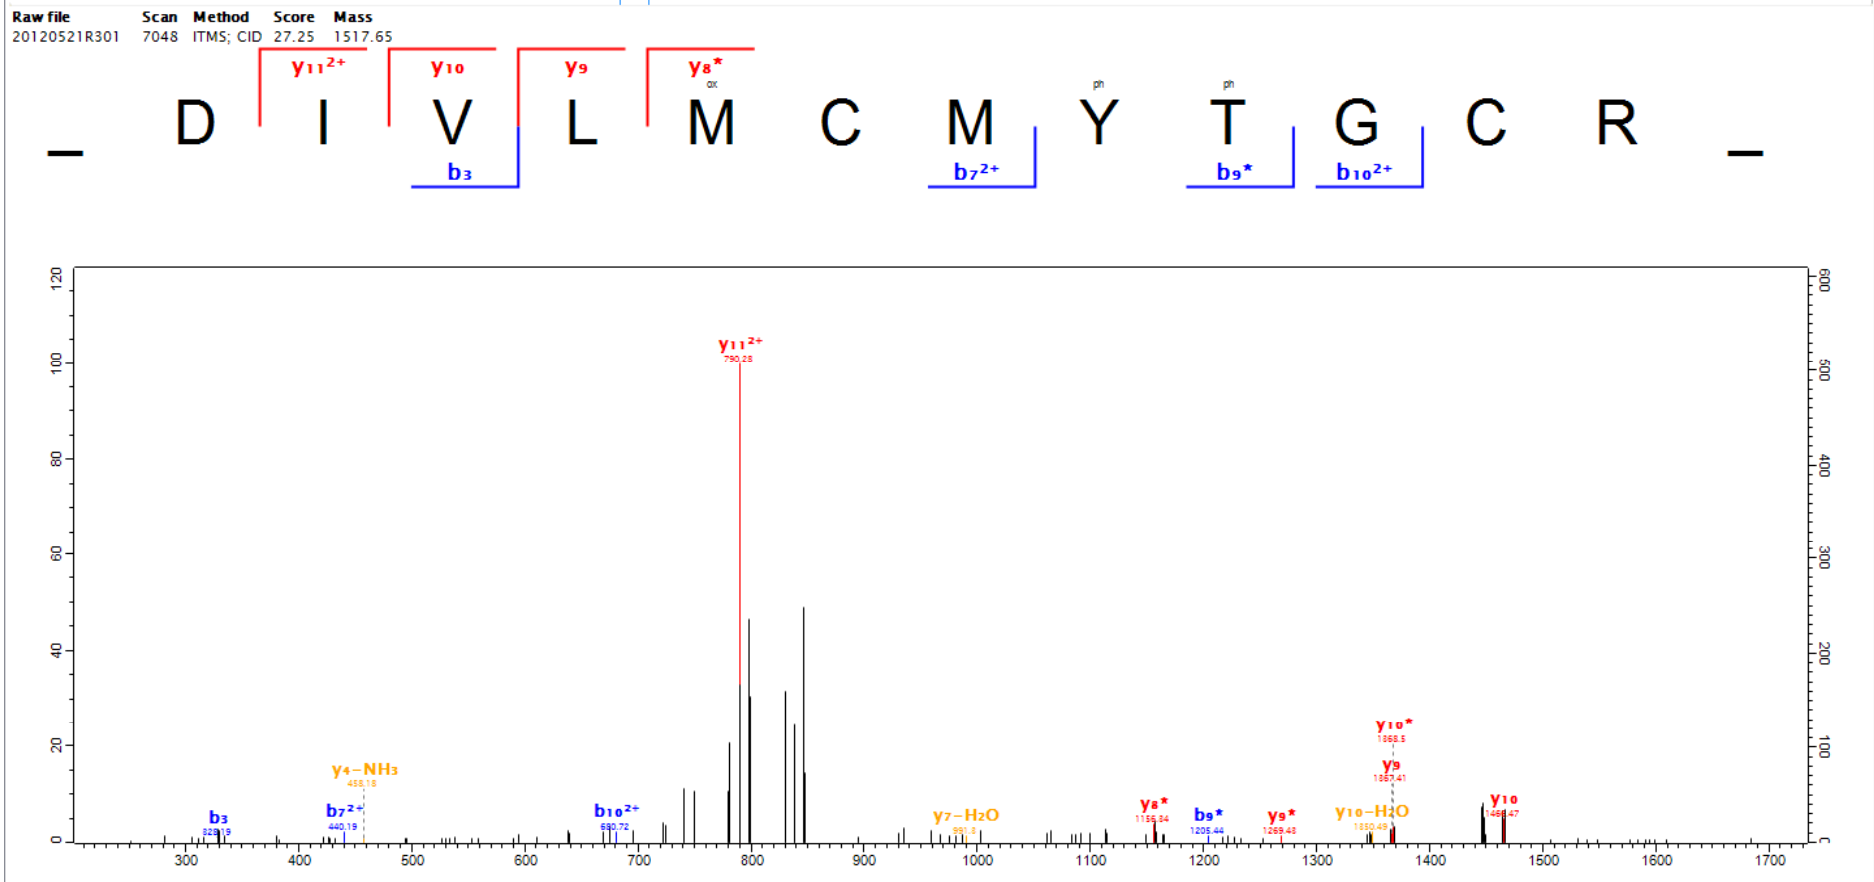



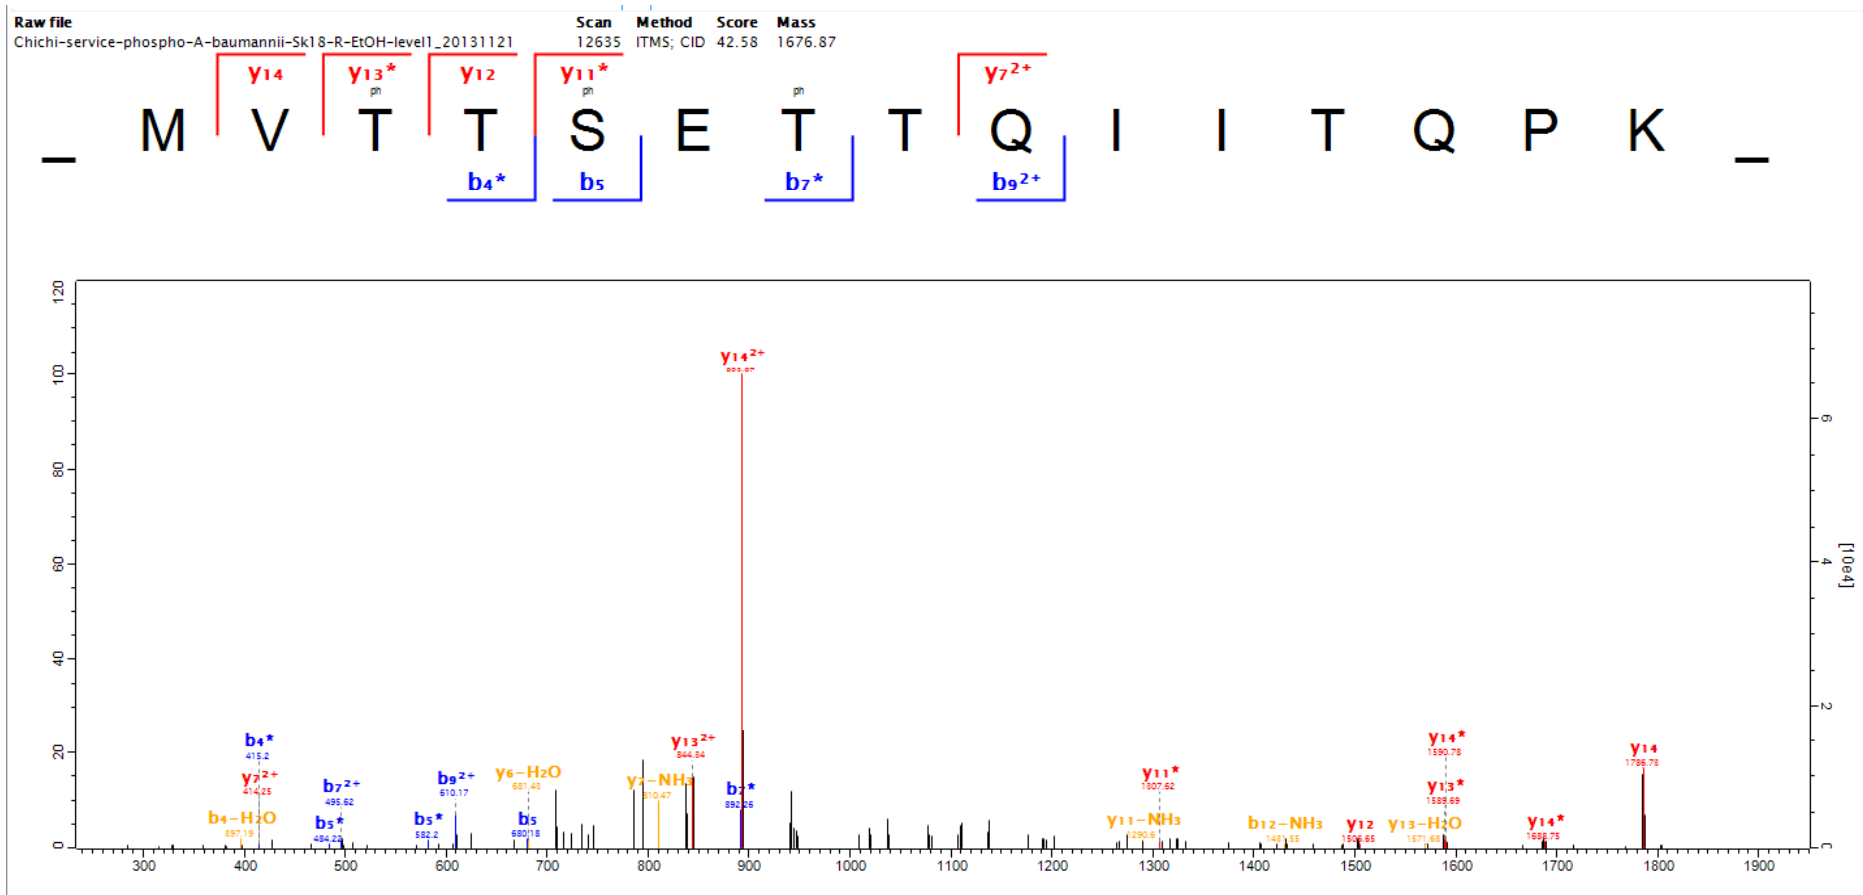



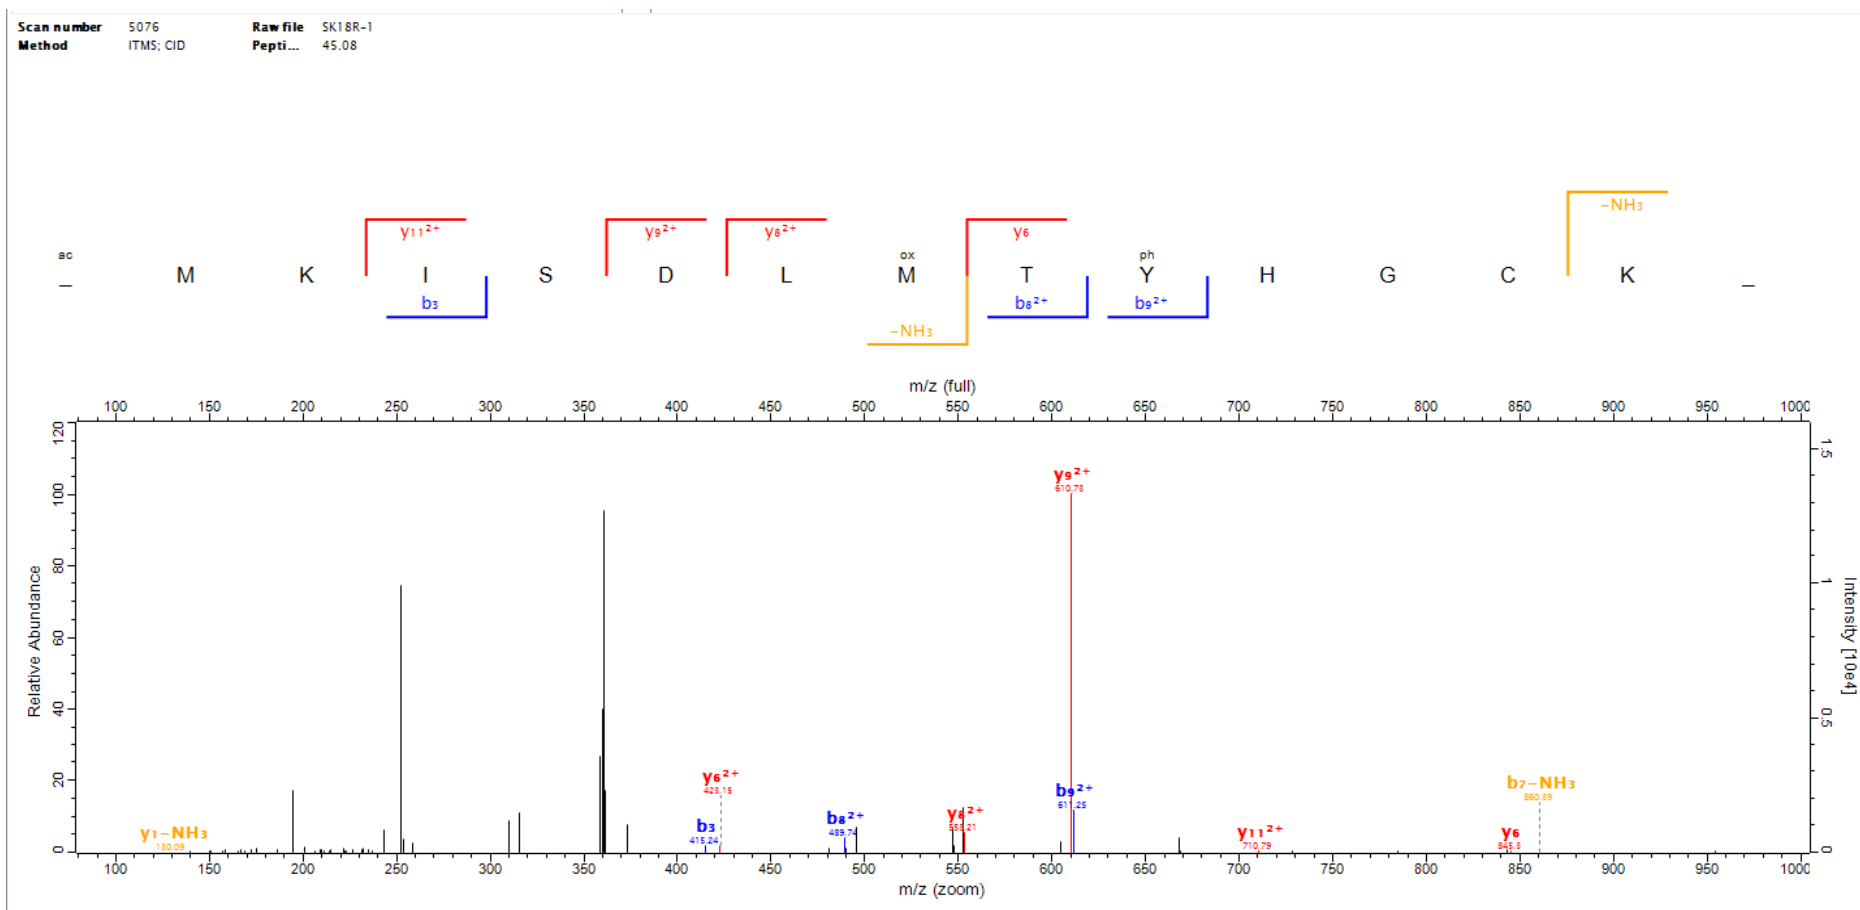

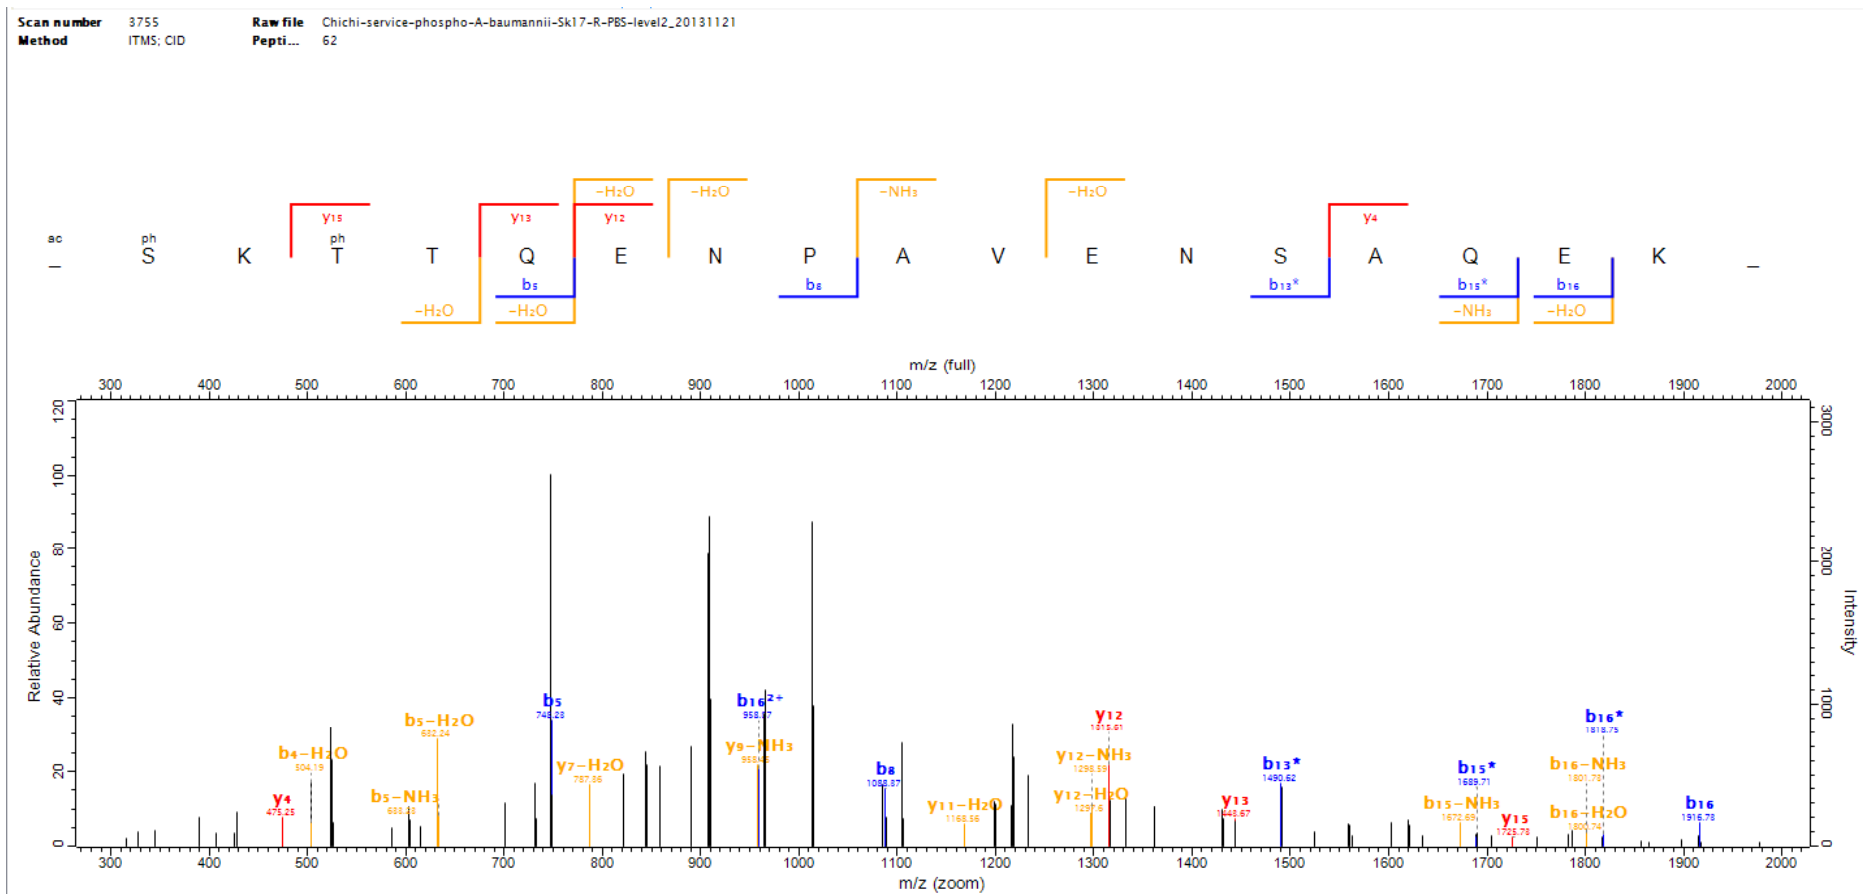

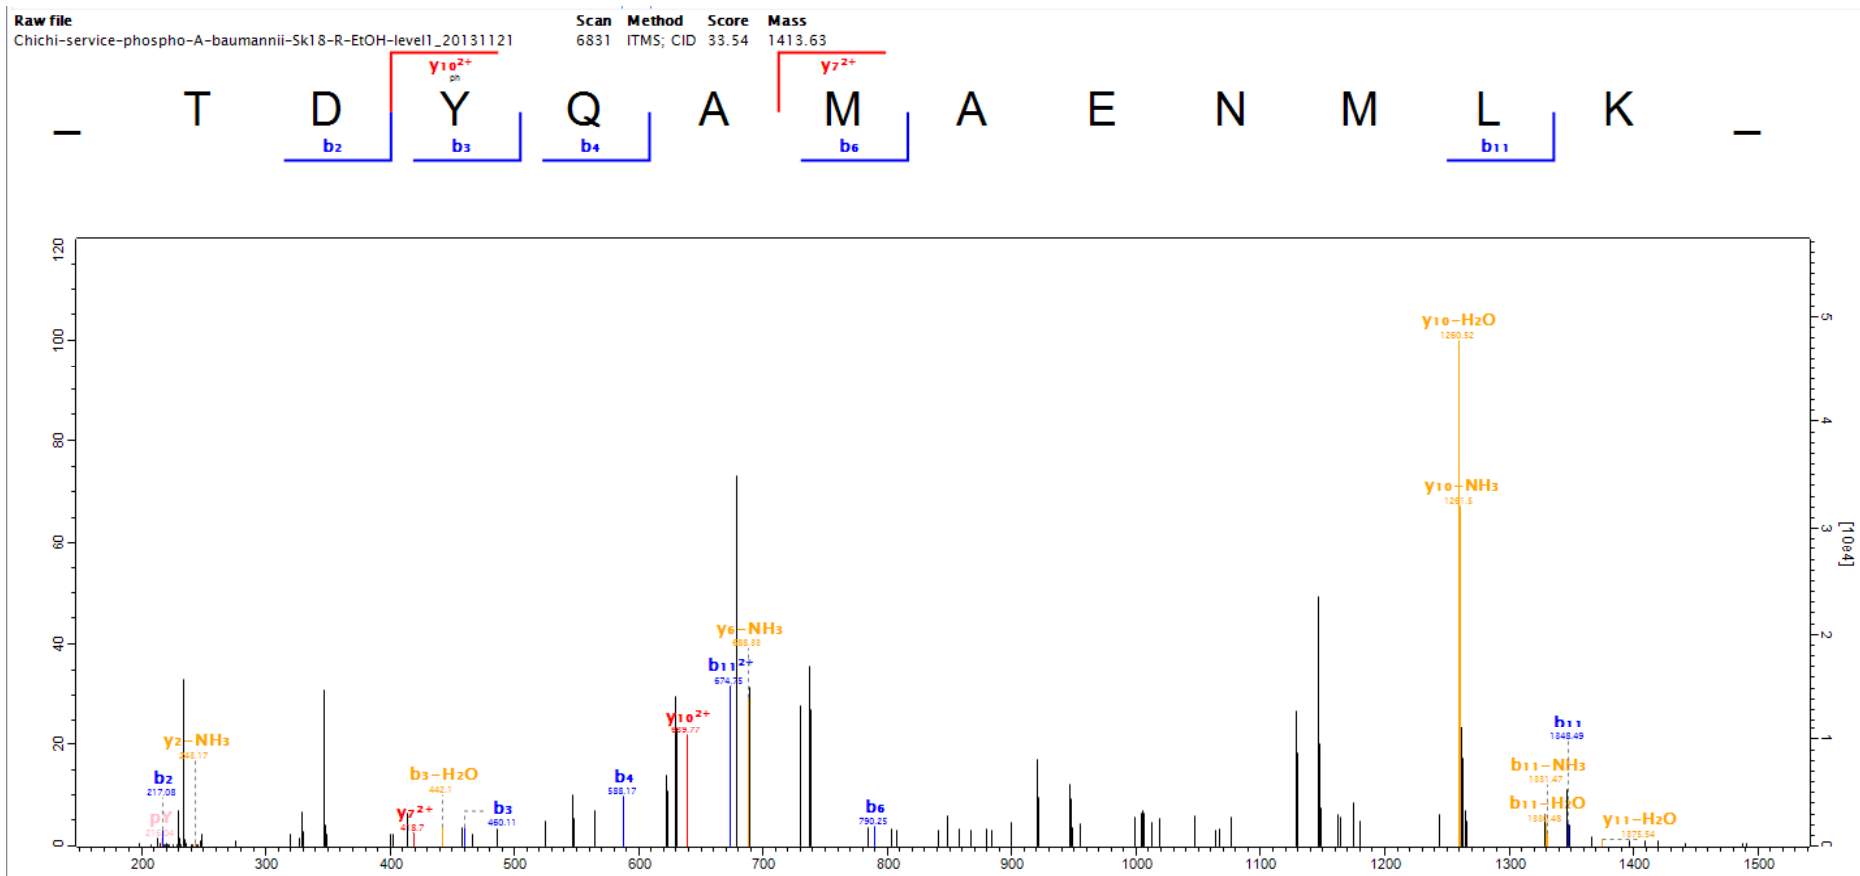

Scan number 2083 Raw file Chichi-service-phospho-A-baumannii-Sk17-R-PBS-level2\_20131121  
 Method ITMS: CID Pepti... 42.71

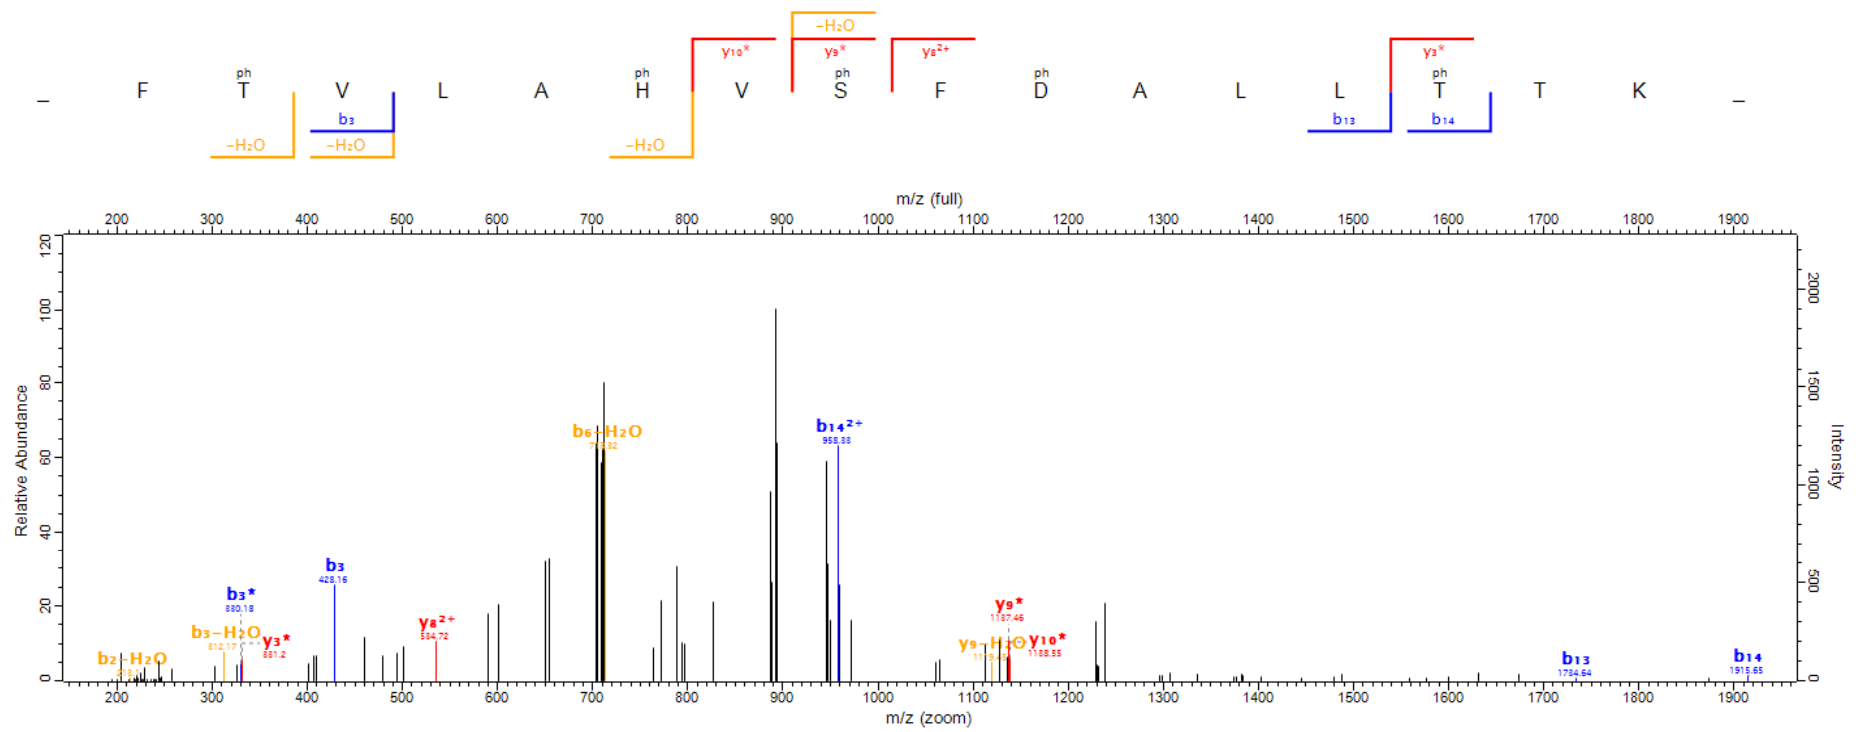

131

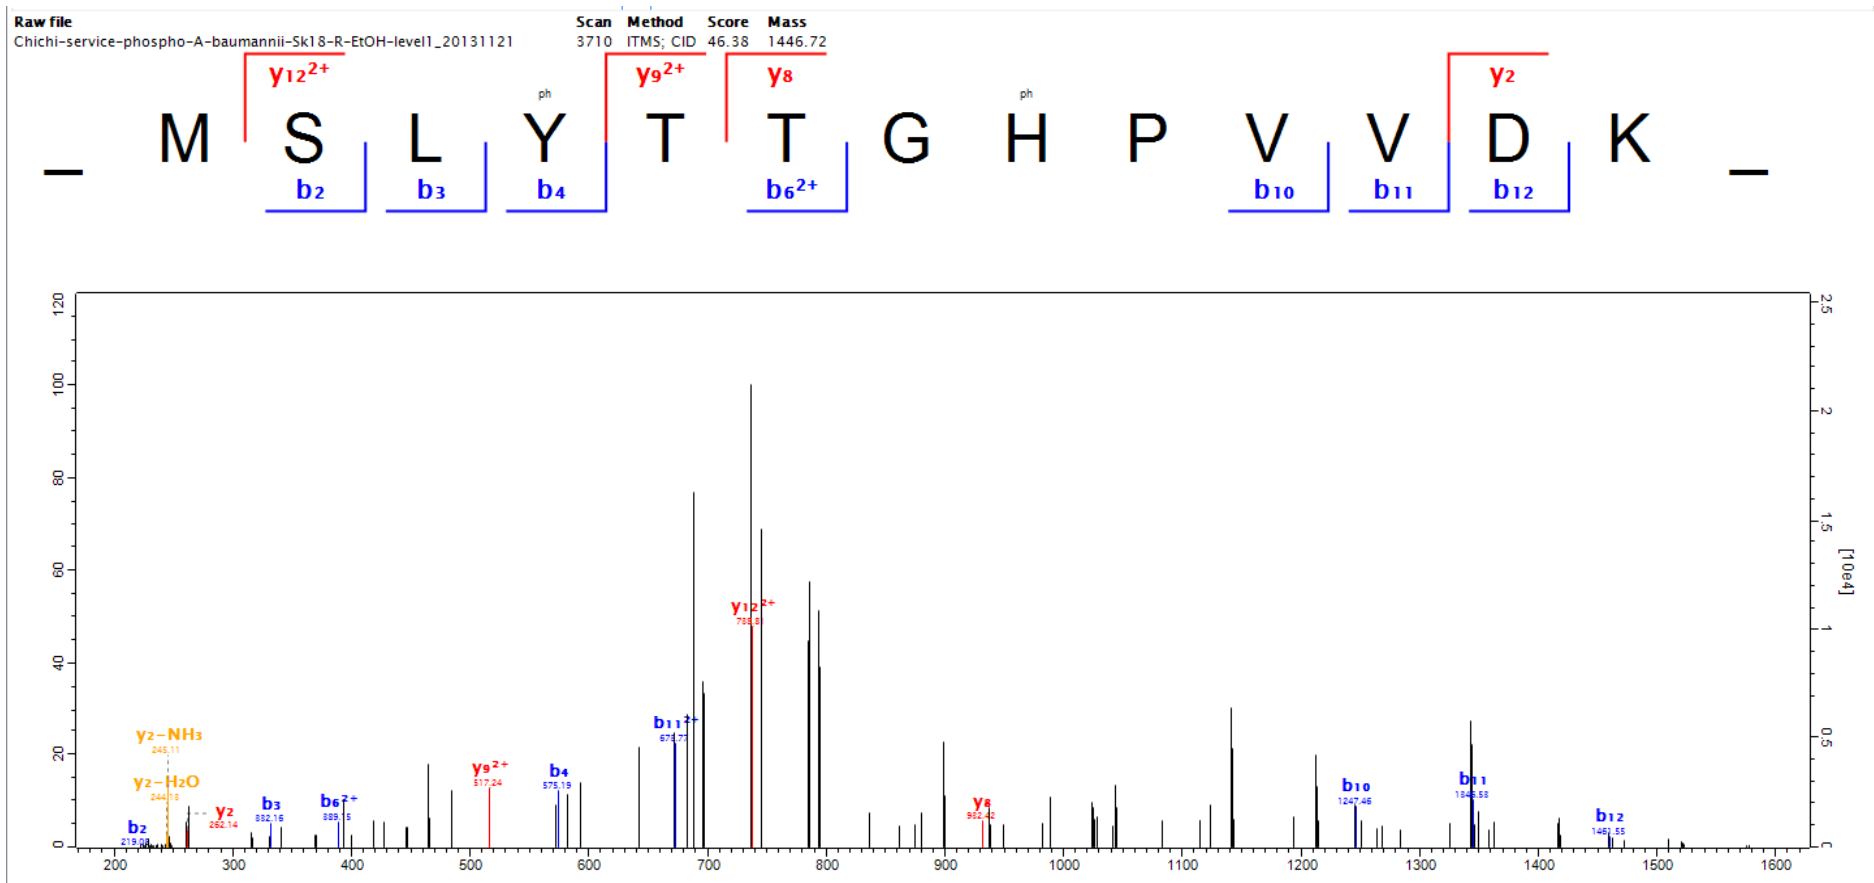

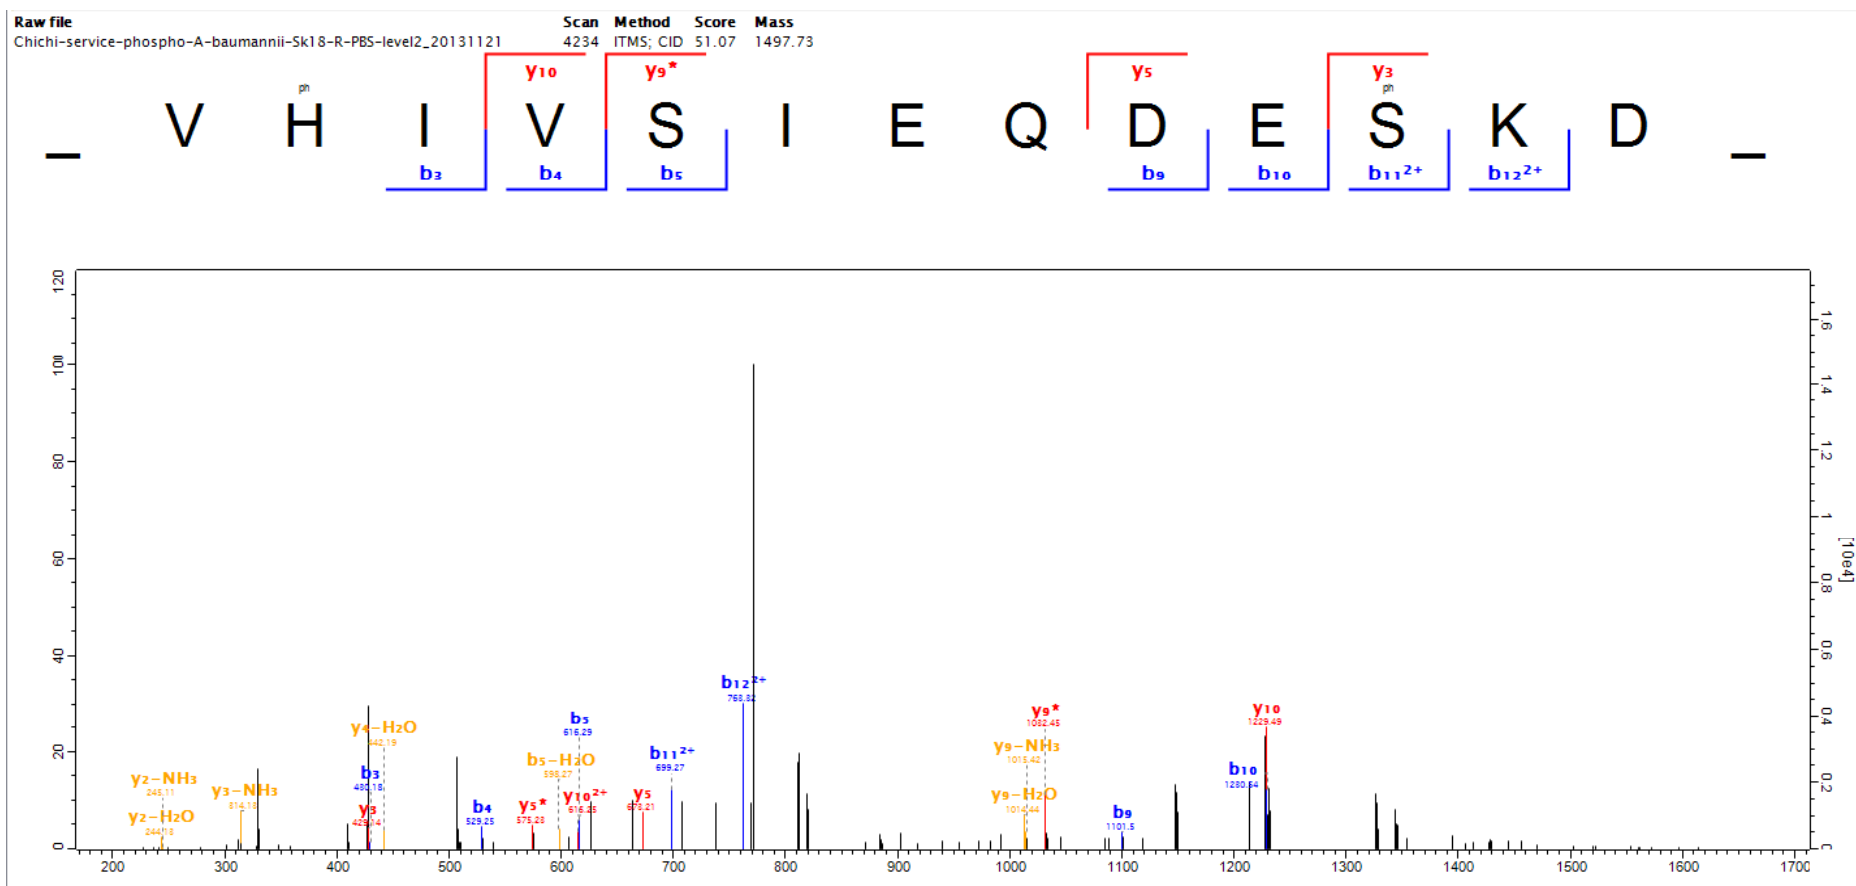



133

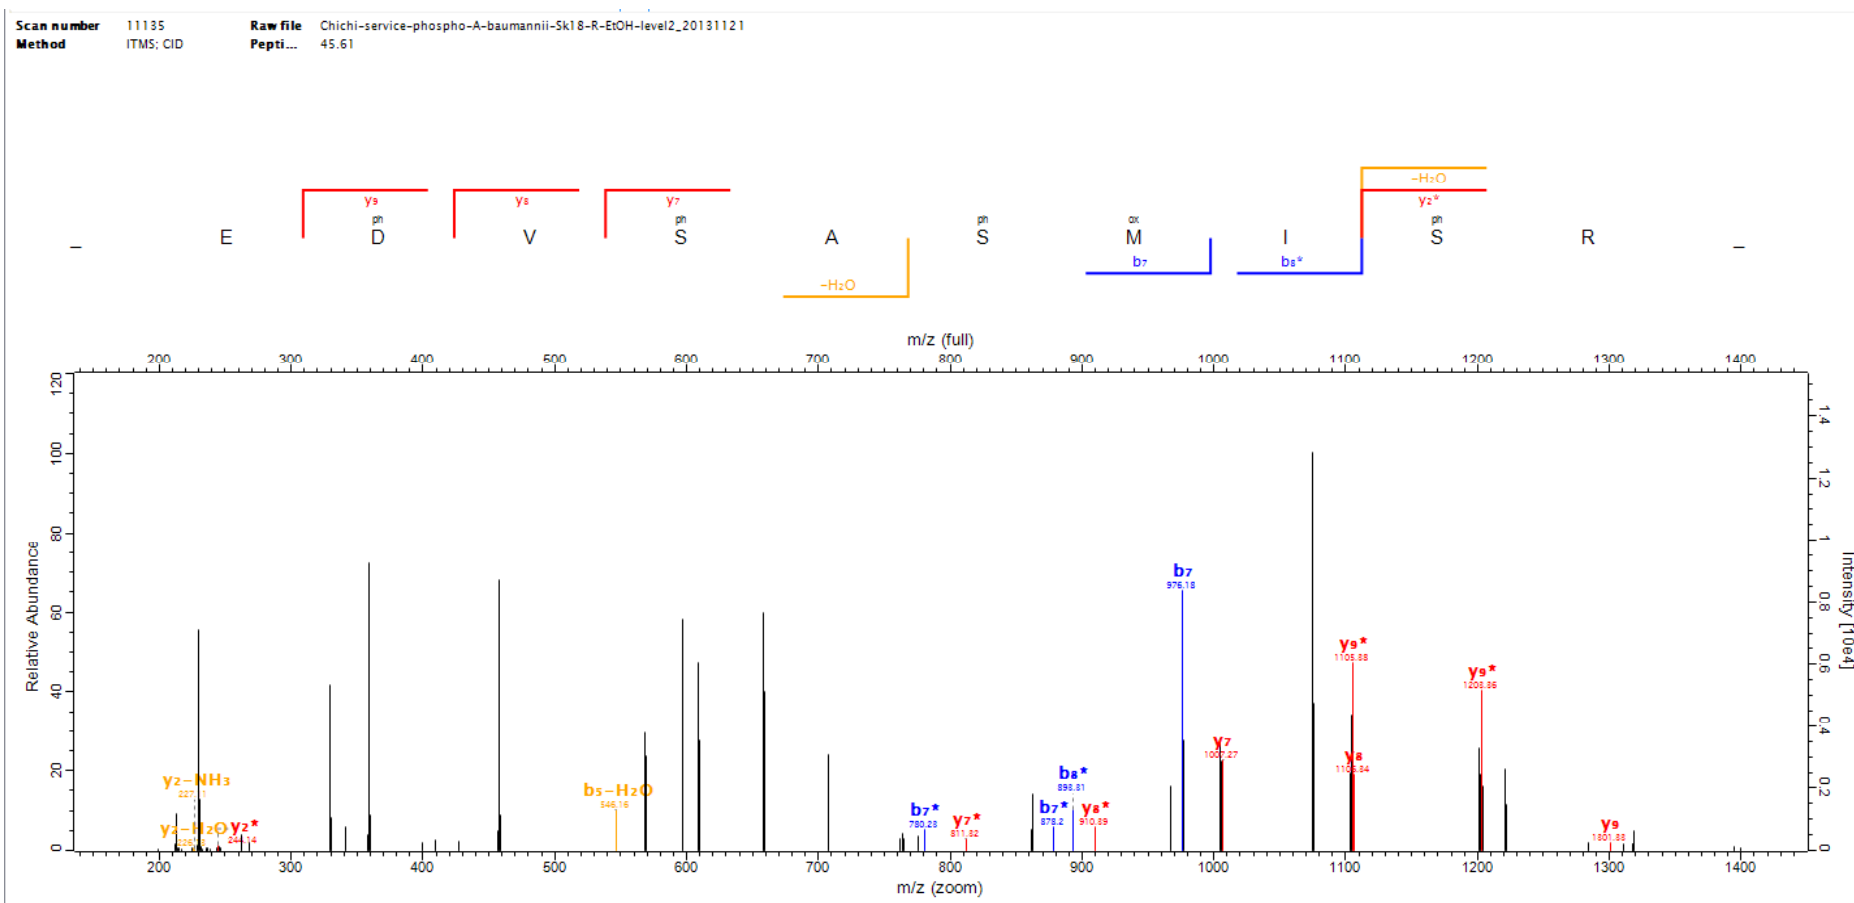

134

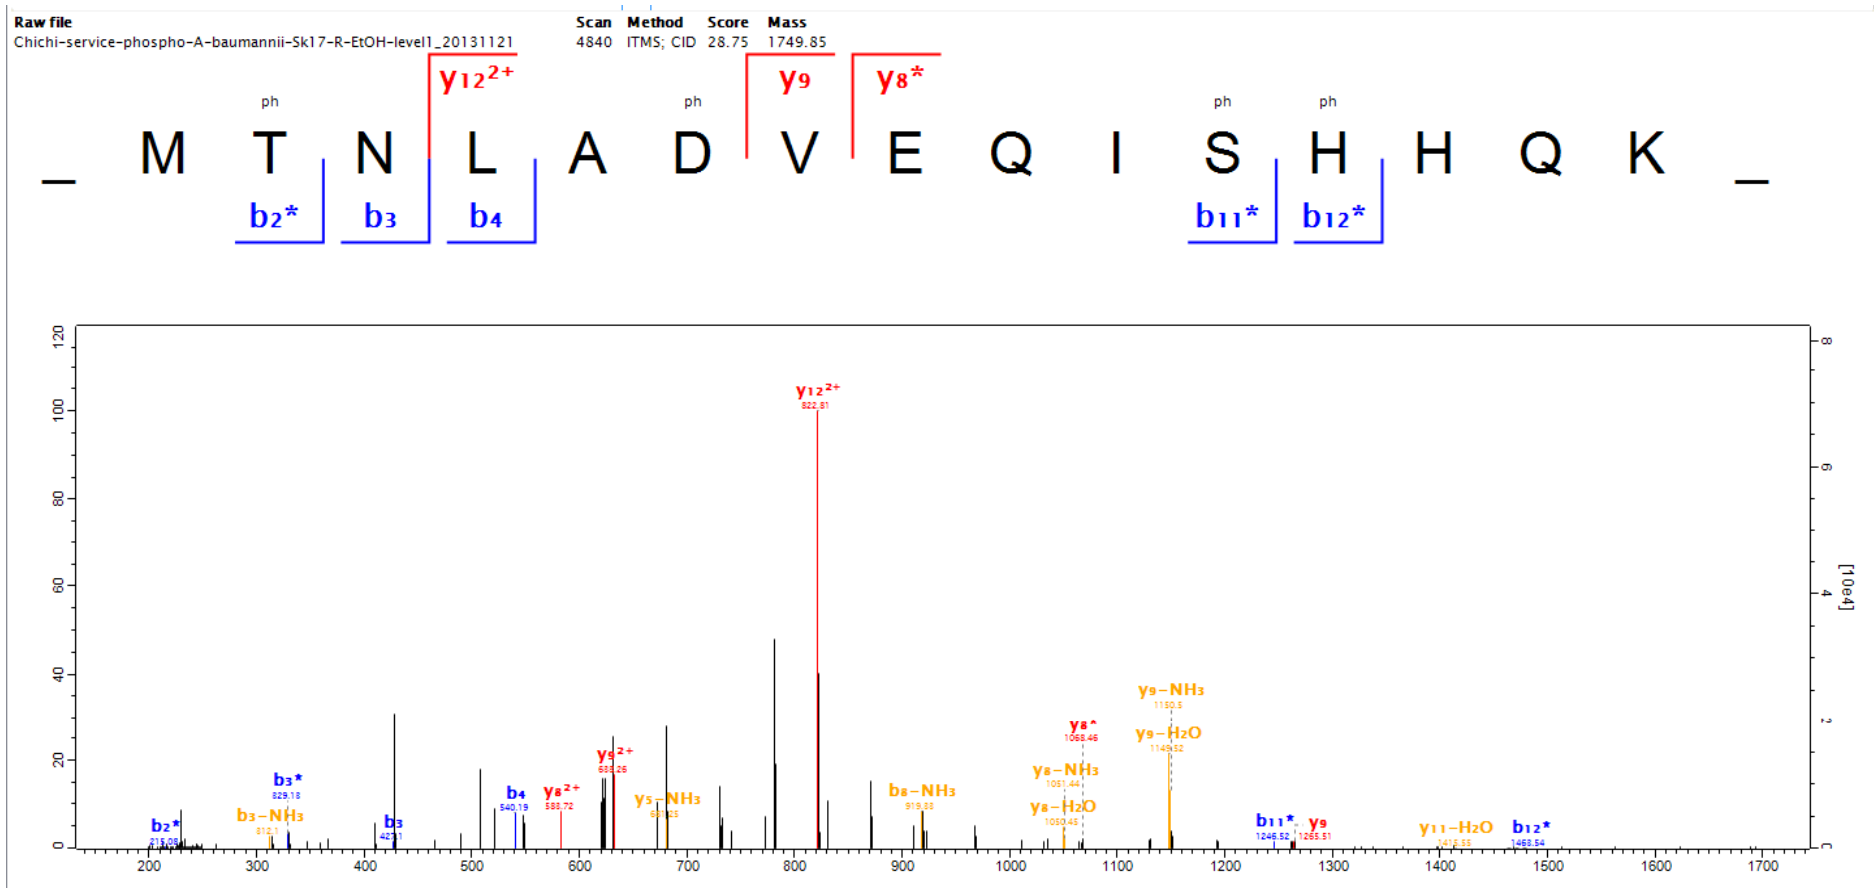

135

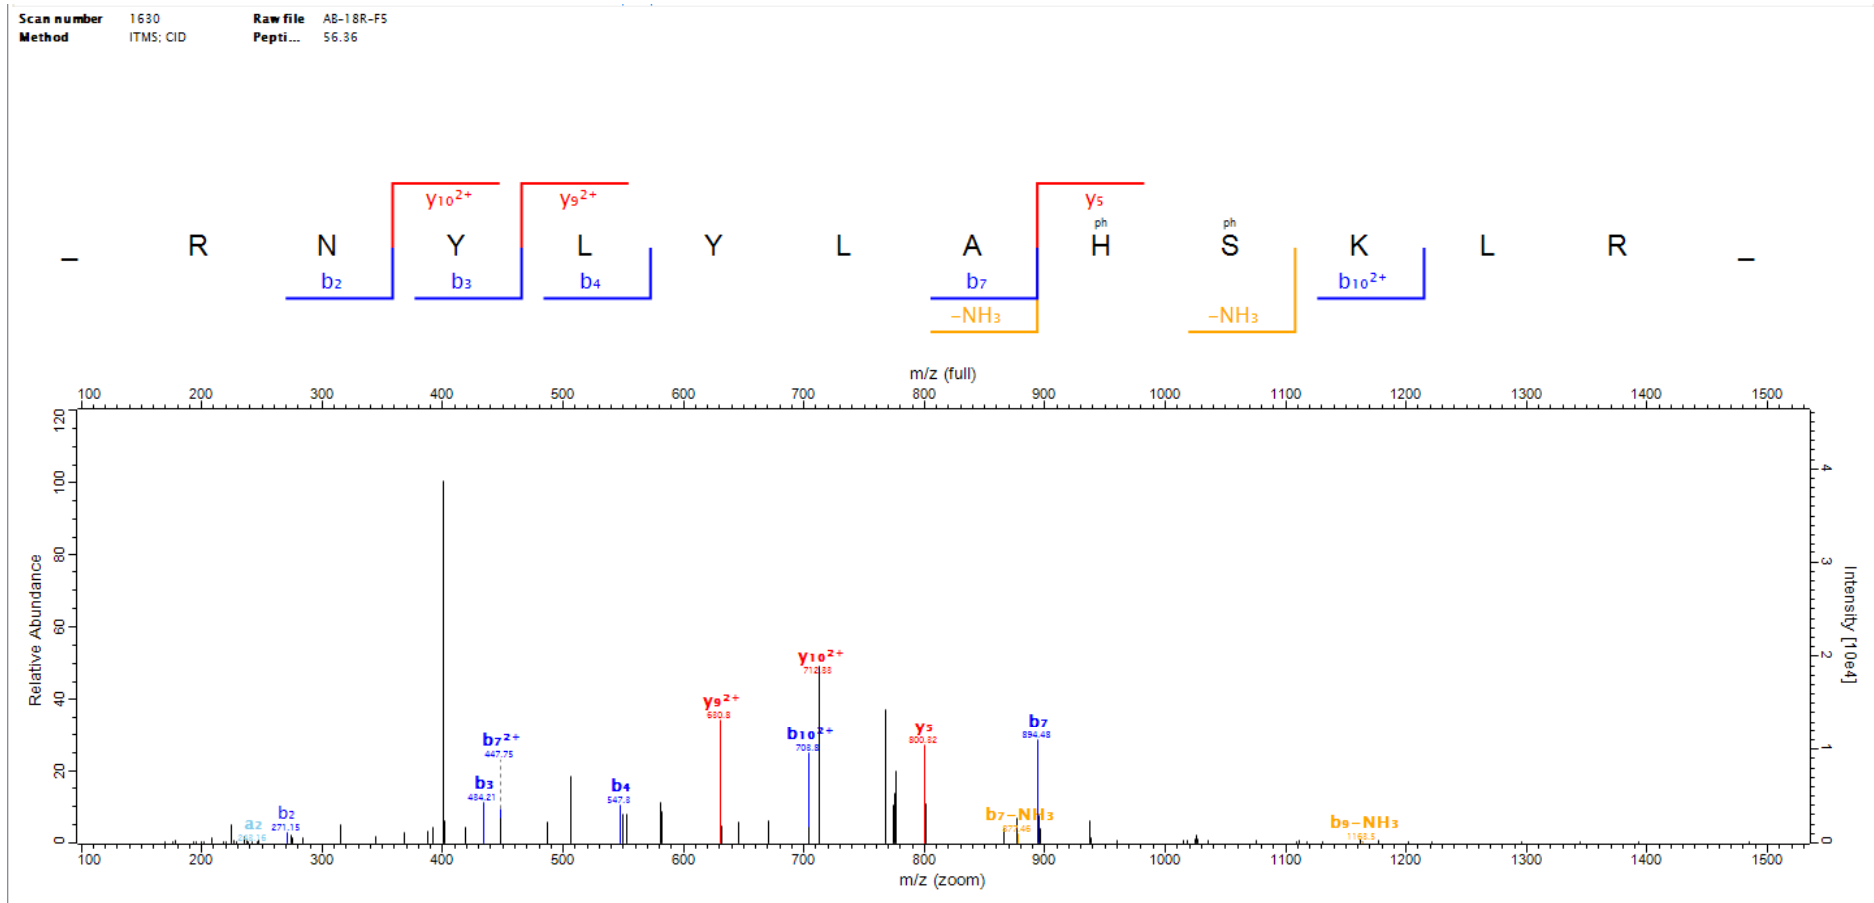

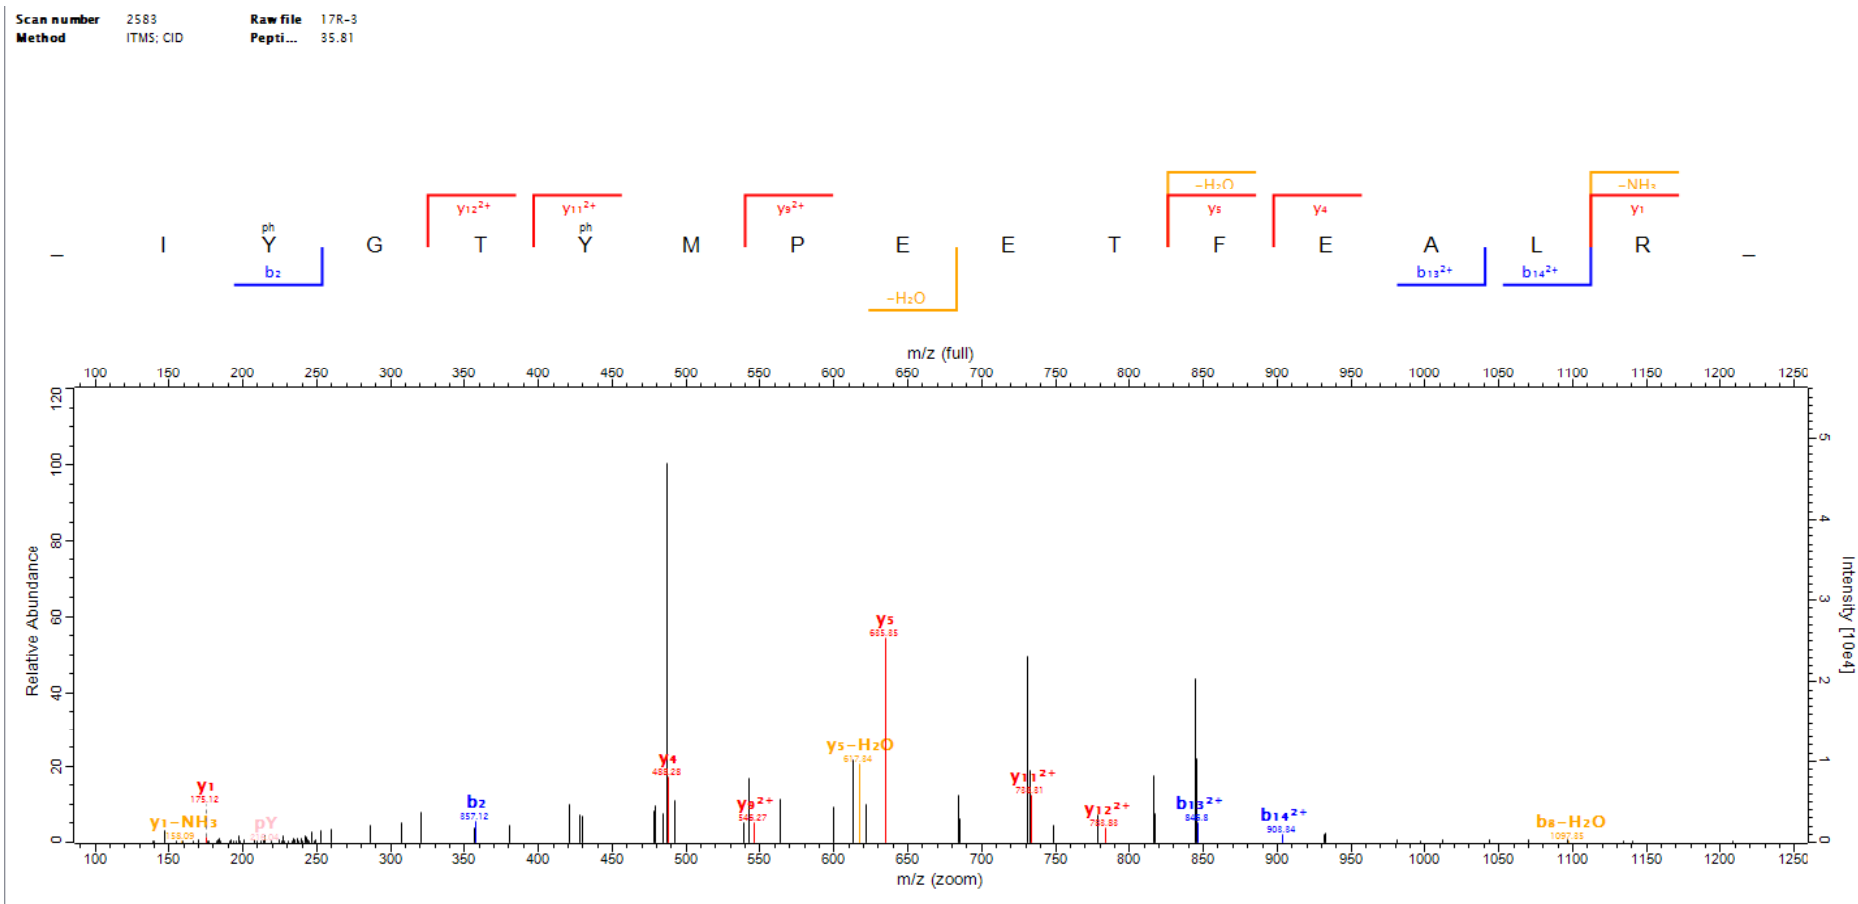

Scan number 13130 Raw file Chichi-service-phospho-A-baumannii-Sk17-R-EtOH-level1\_20131121  
 Method ITMS; CID Pepti... 32.19

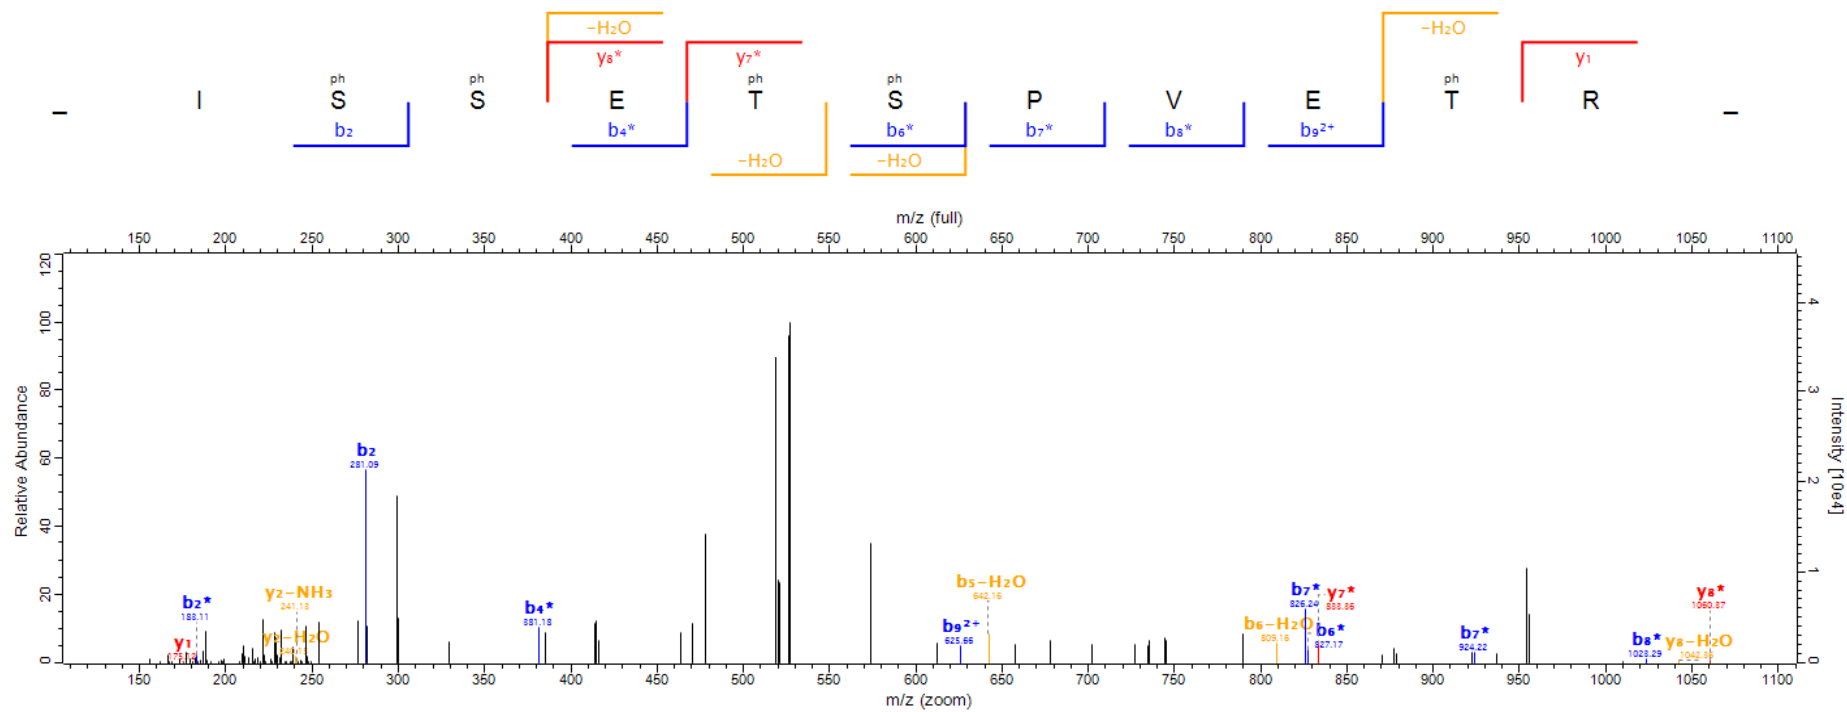

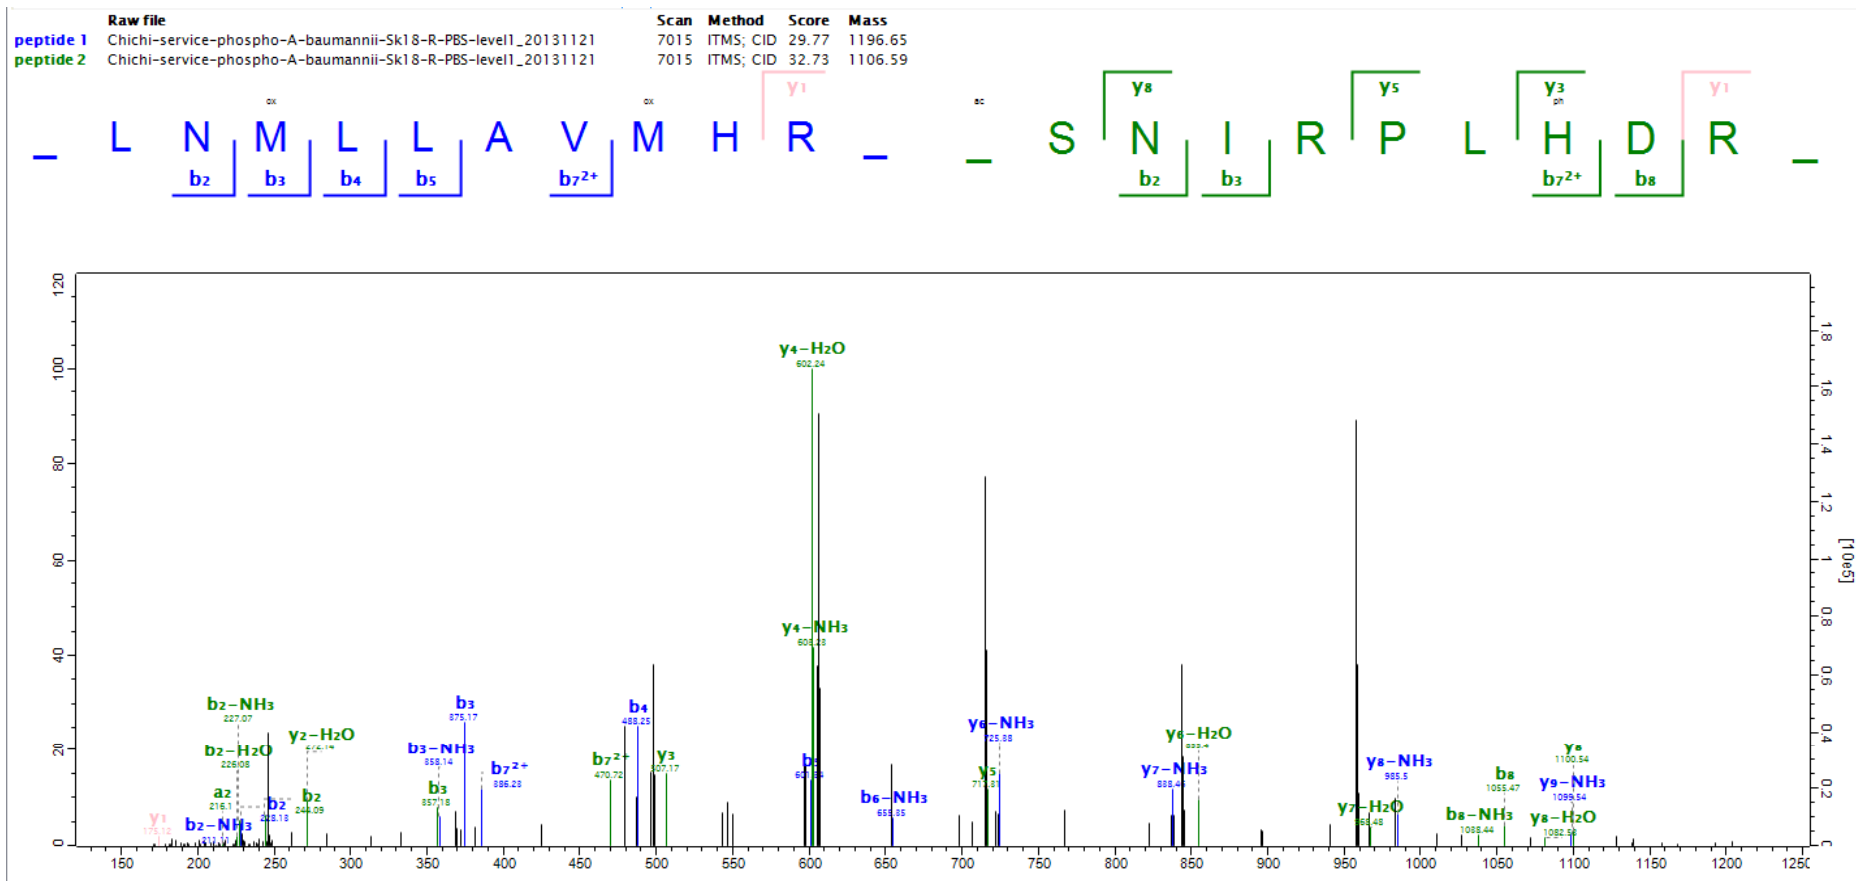

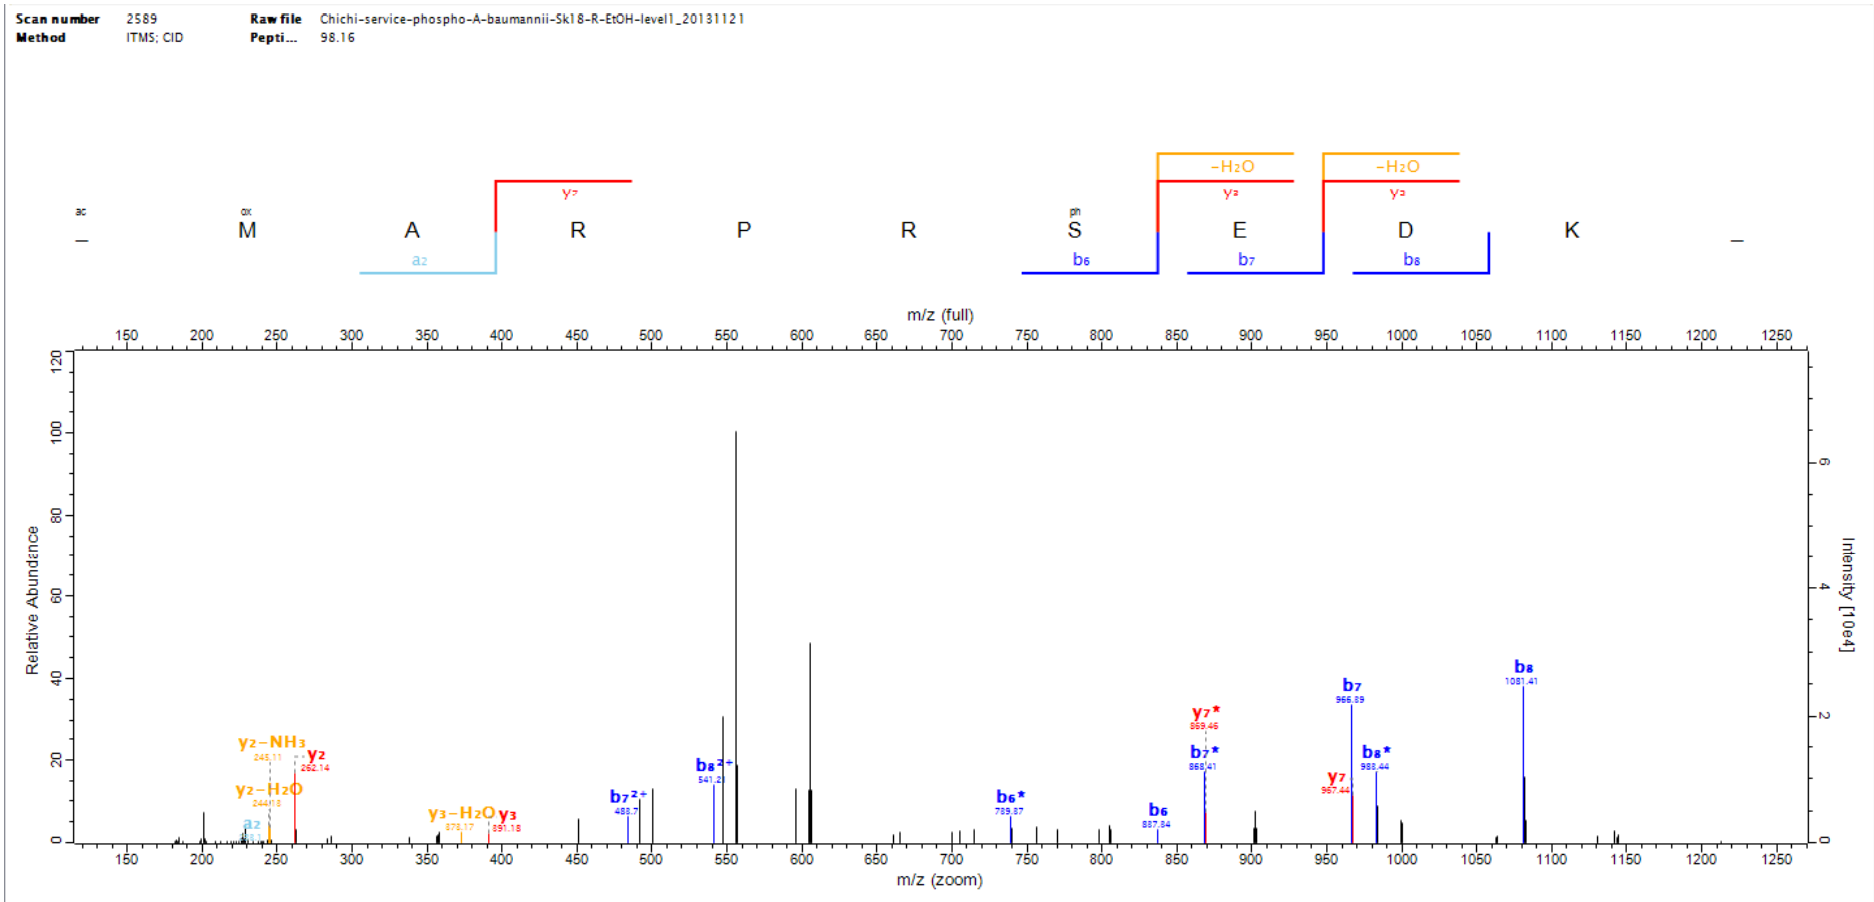

140-1

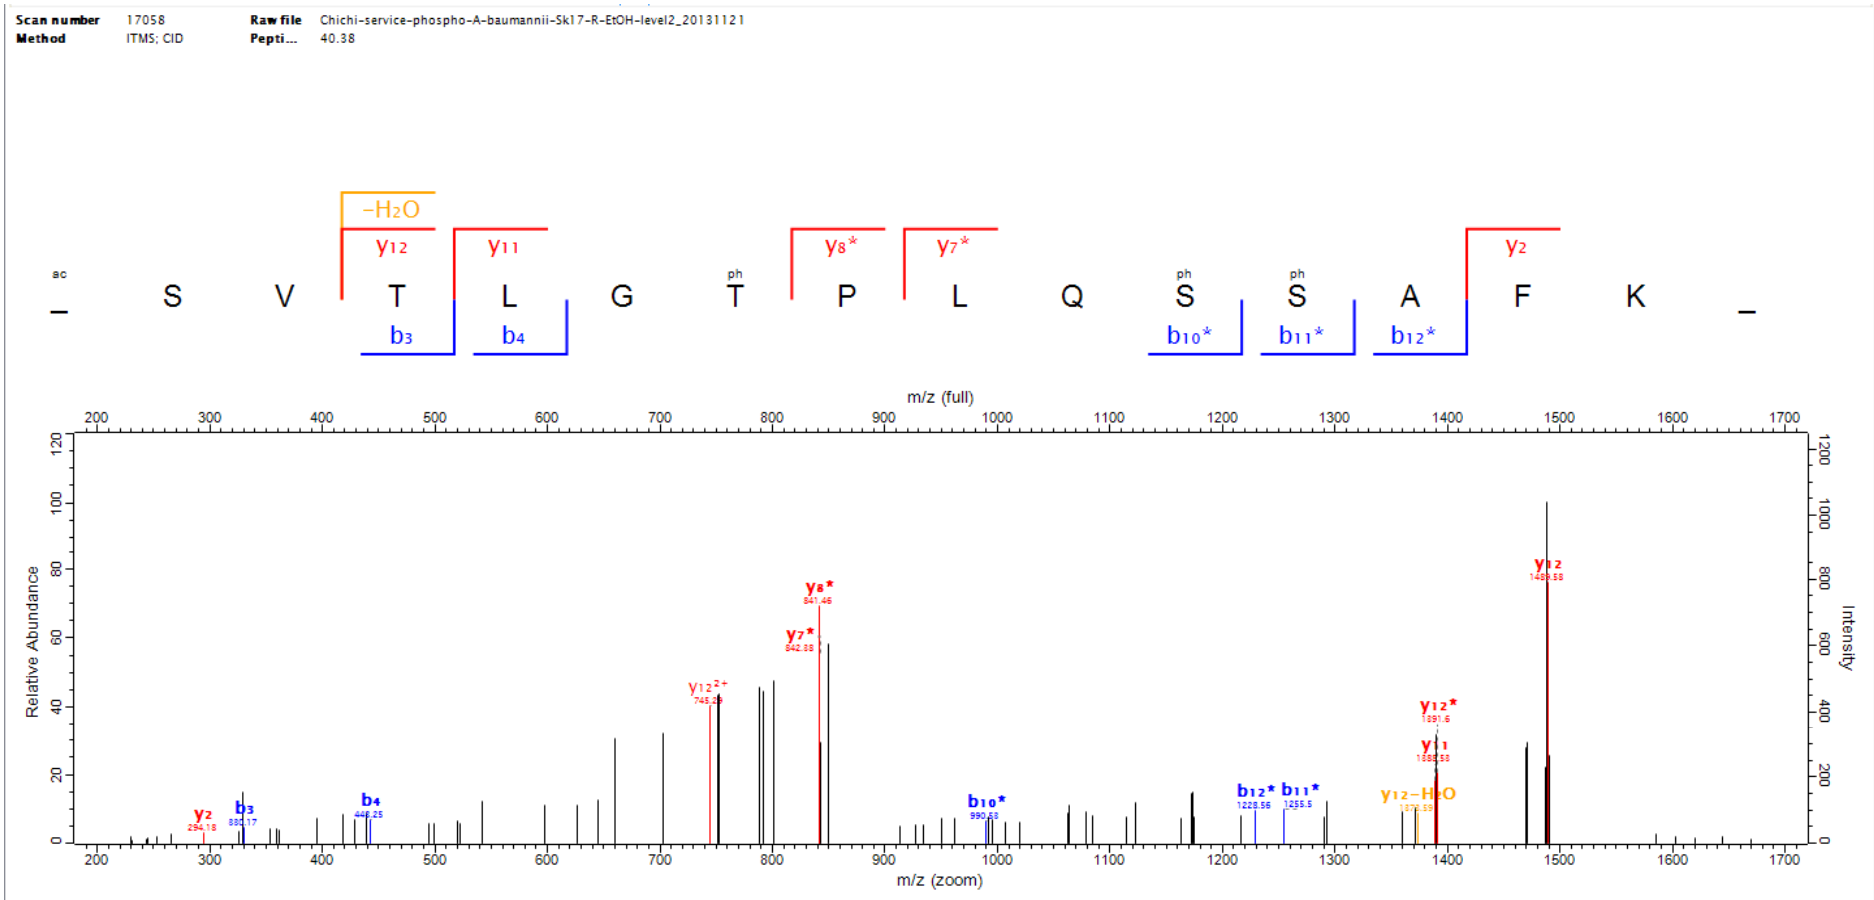



140-2

Scan number 17544 Raw file Chichi-service-phospho-A-baumannii-Sk17-R-EtOH-level2\_20131121  
Method ITMS: CID Pepti... 47.32

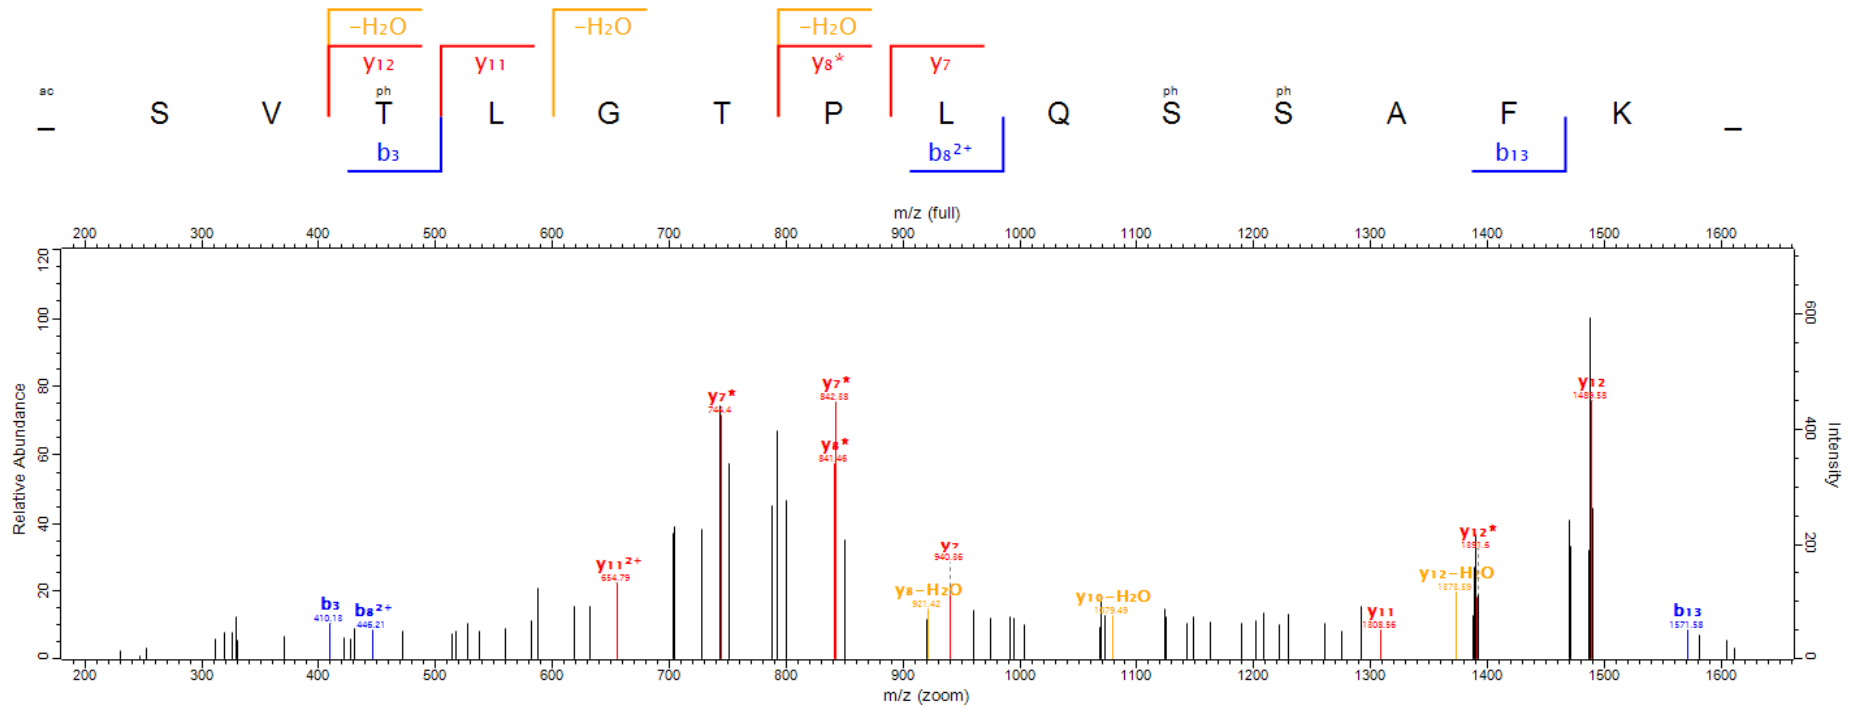

Scan number 5670 Raw file Chichi-service-phospho-A-baumannii-Sk18-R-EtOH-level2\_20131121  
 Method ITMS; CID Pepti... 38.3

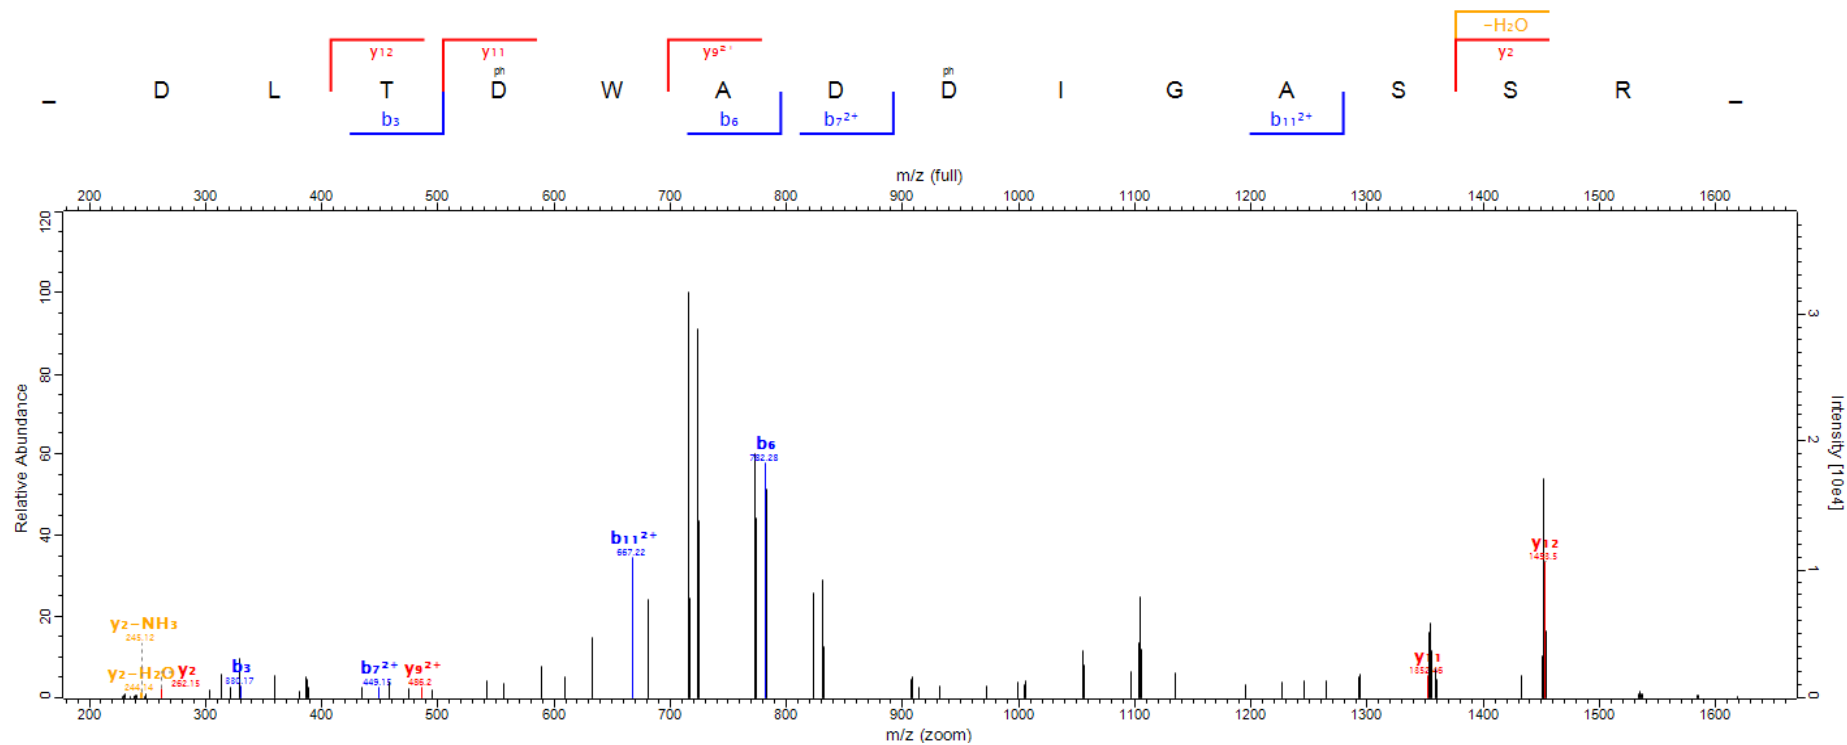

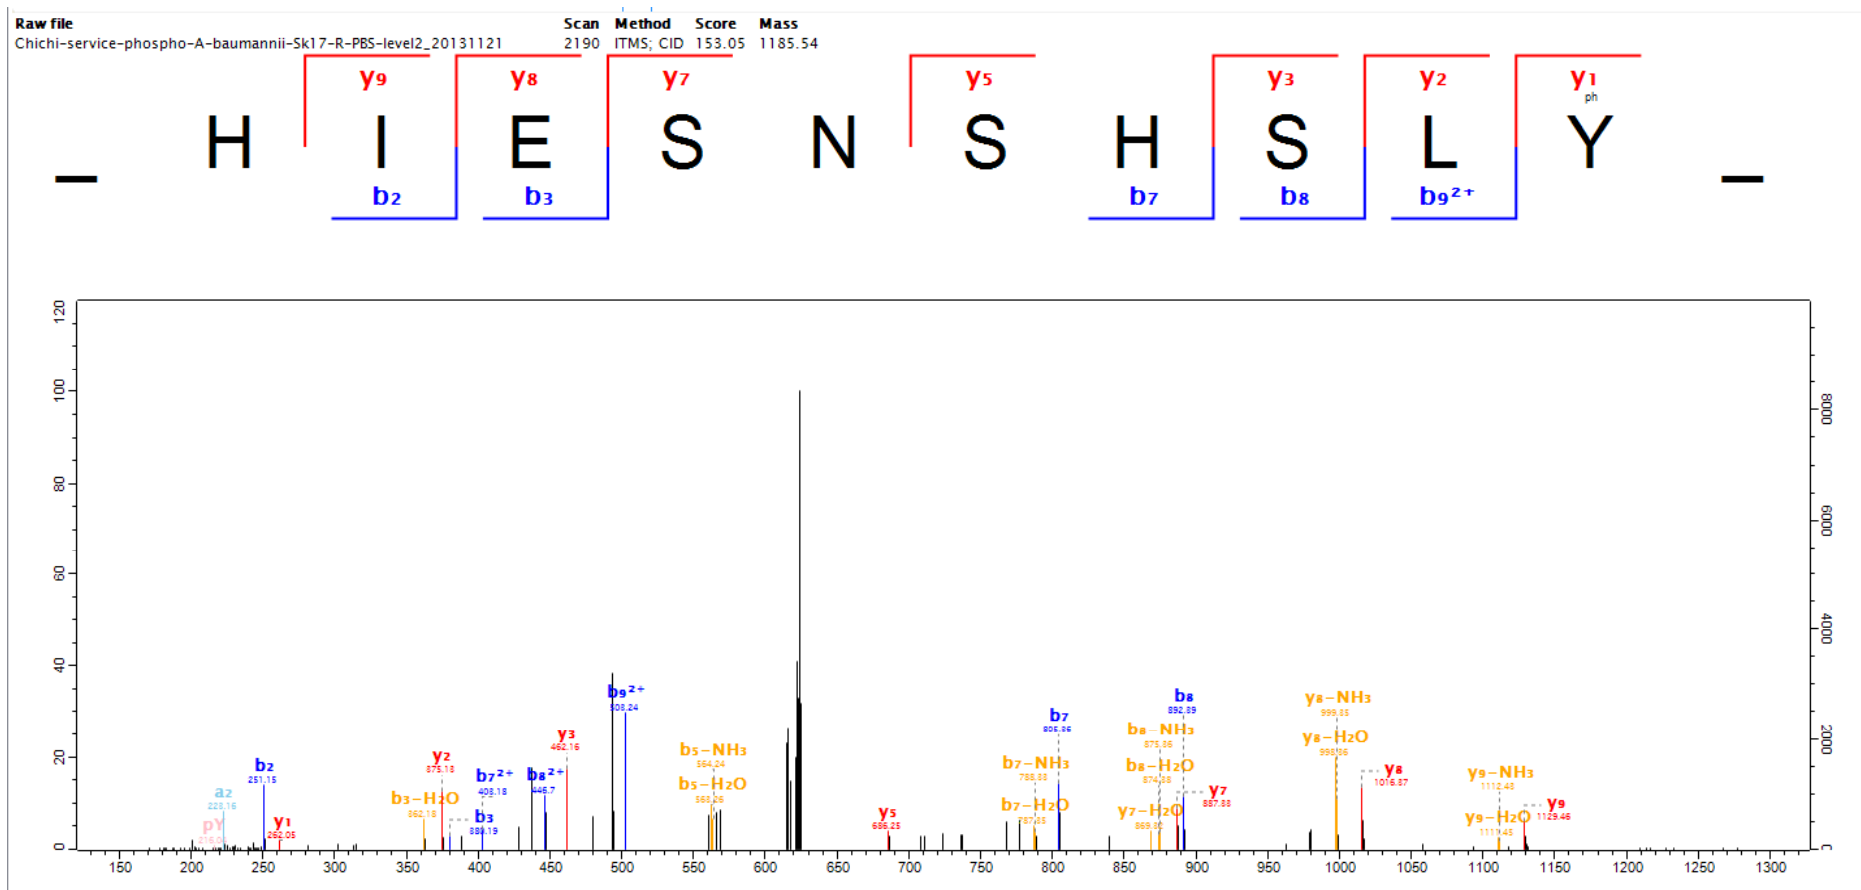

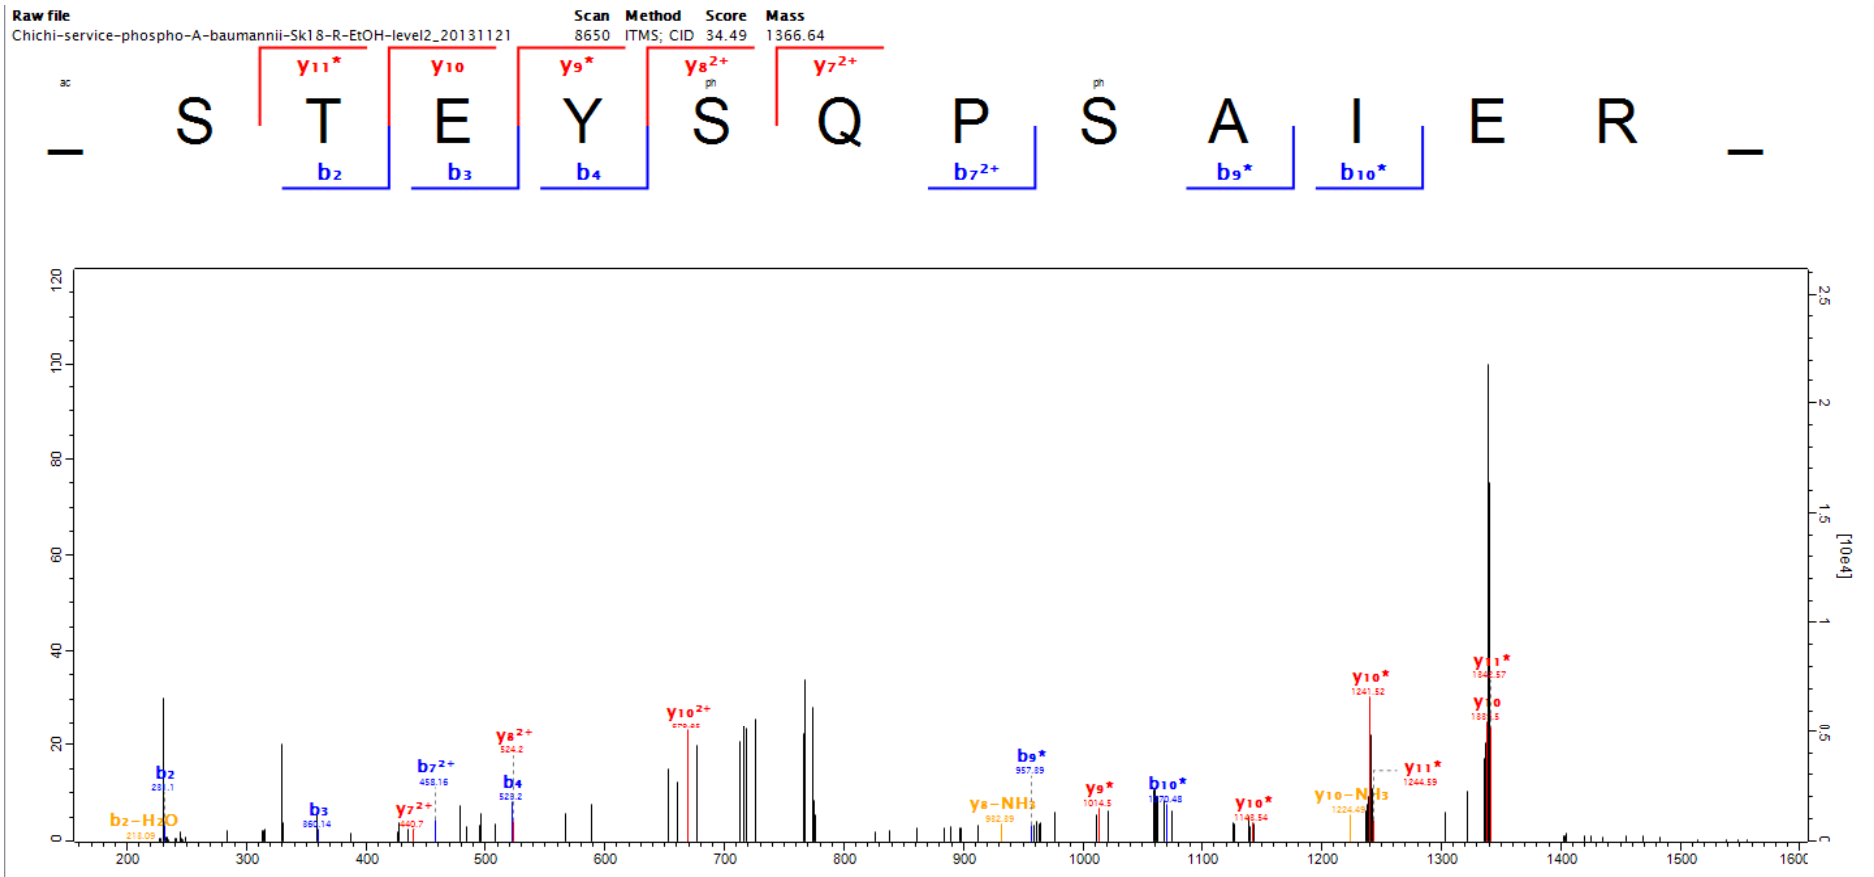

144

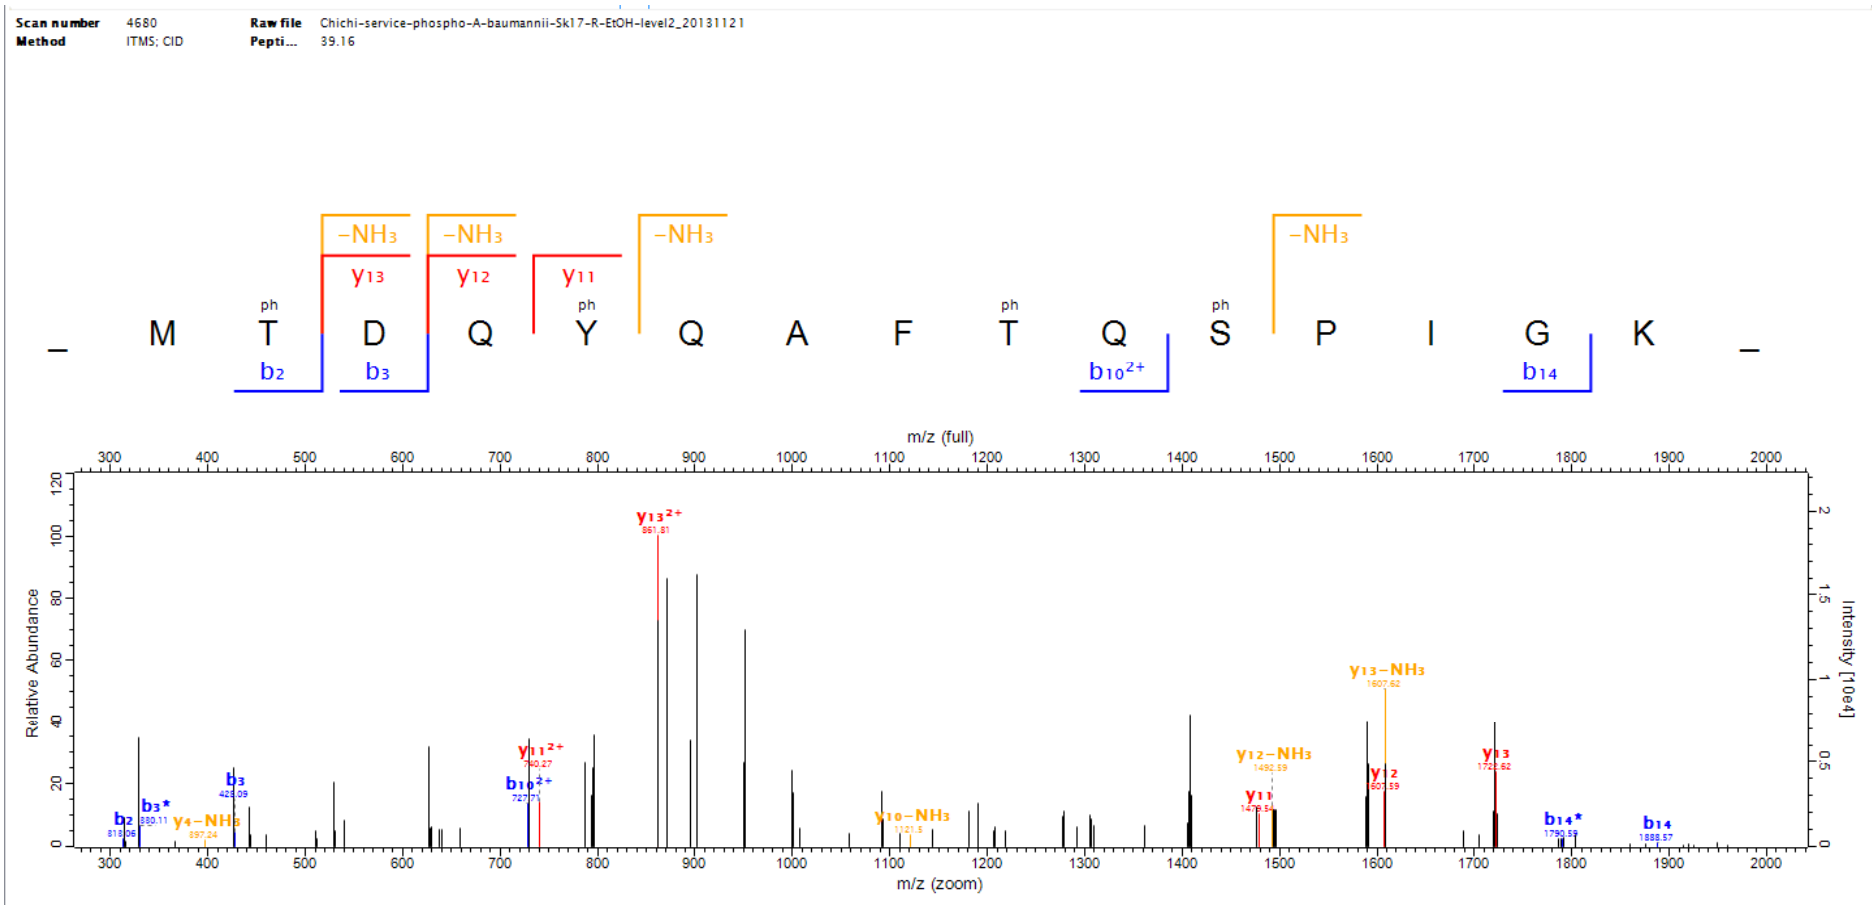

Scan number 11198 Raw file 20120521R101  
 Method ITMS; CID Pepti... 31.47

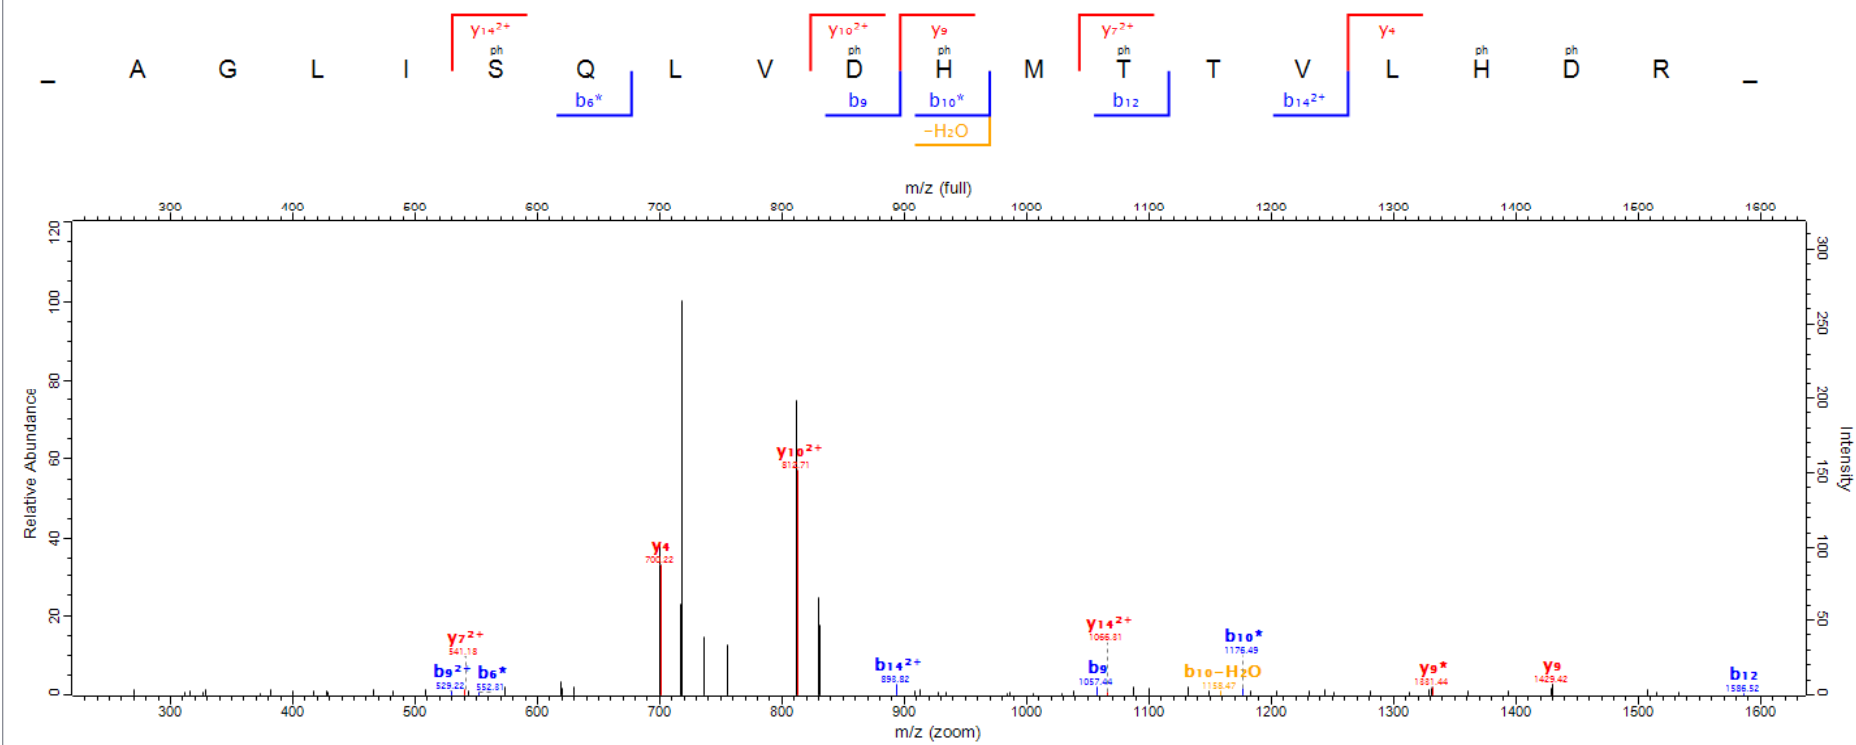

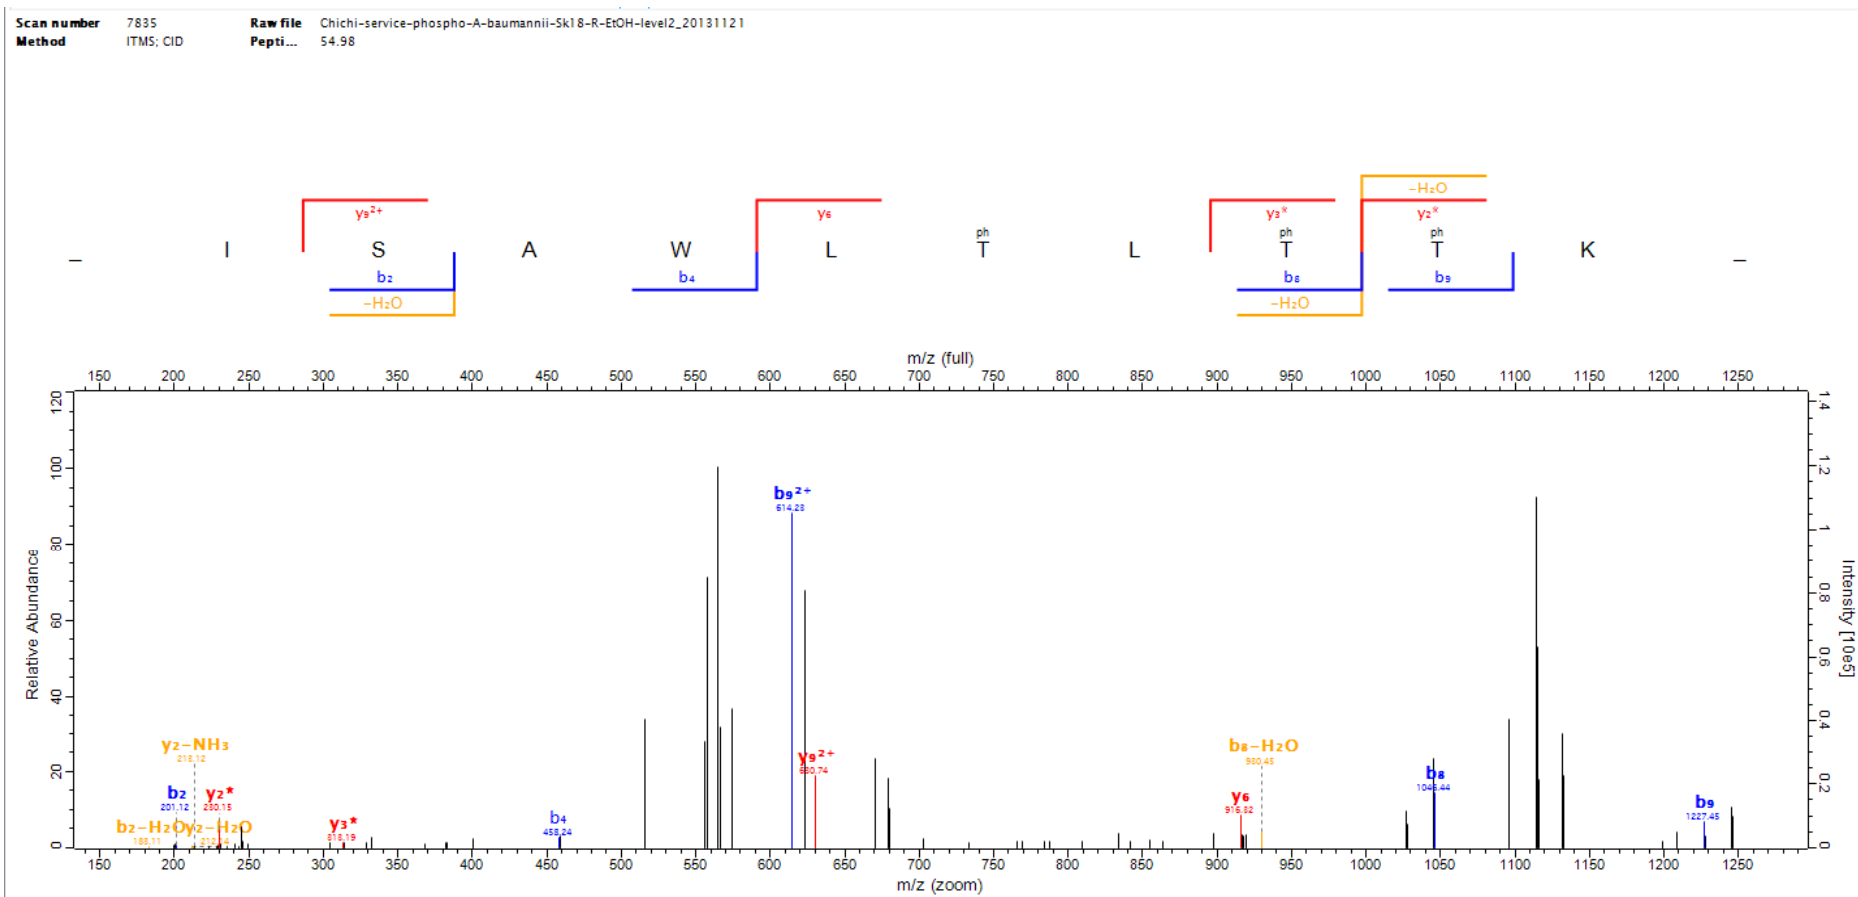

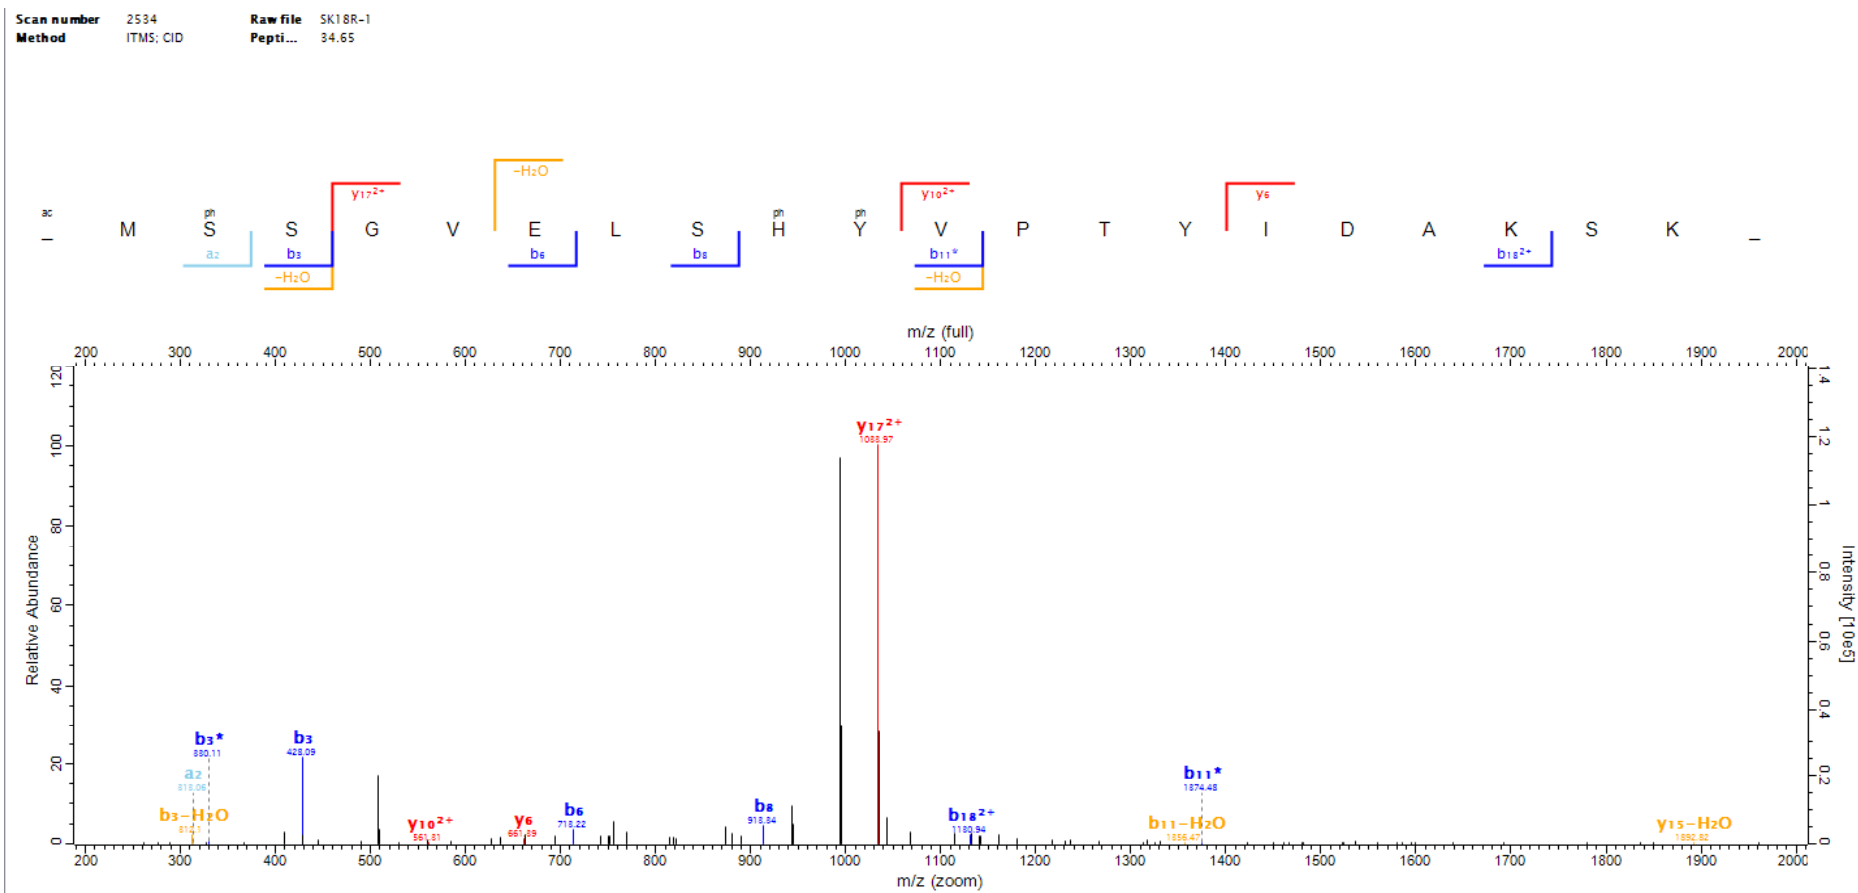



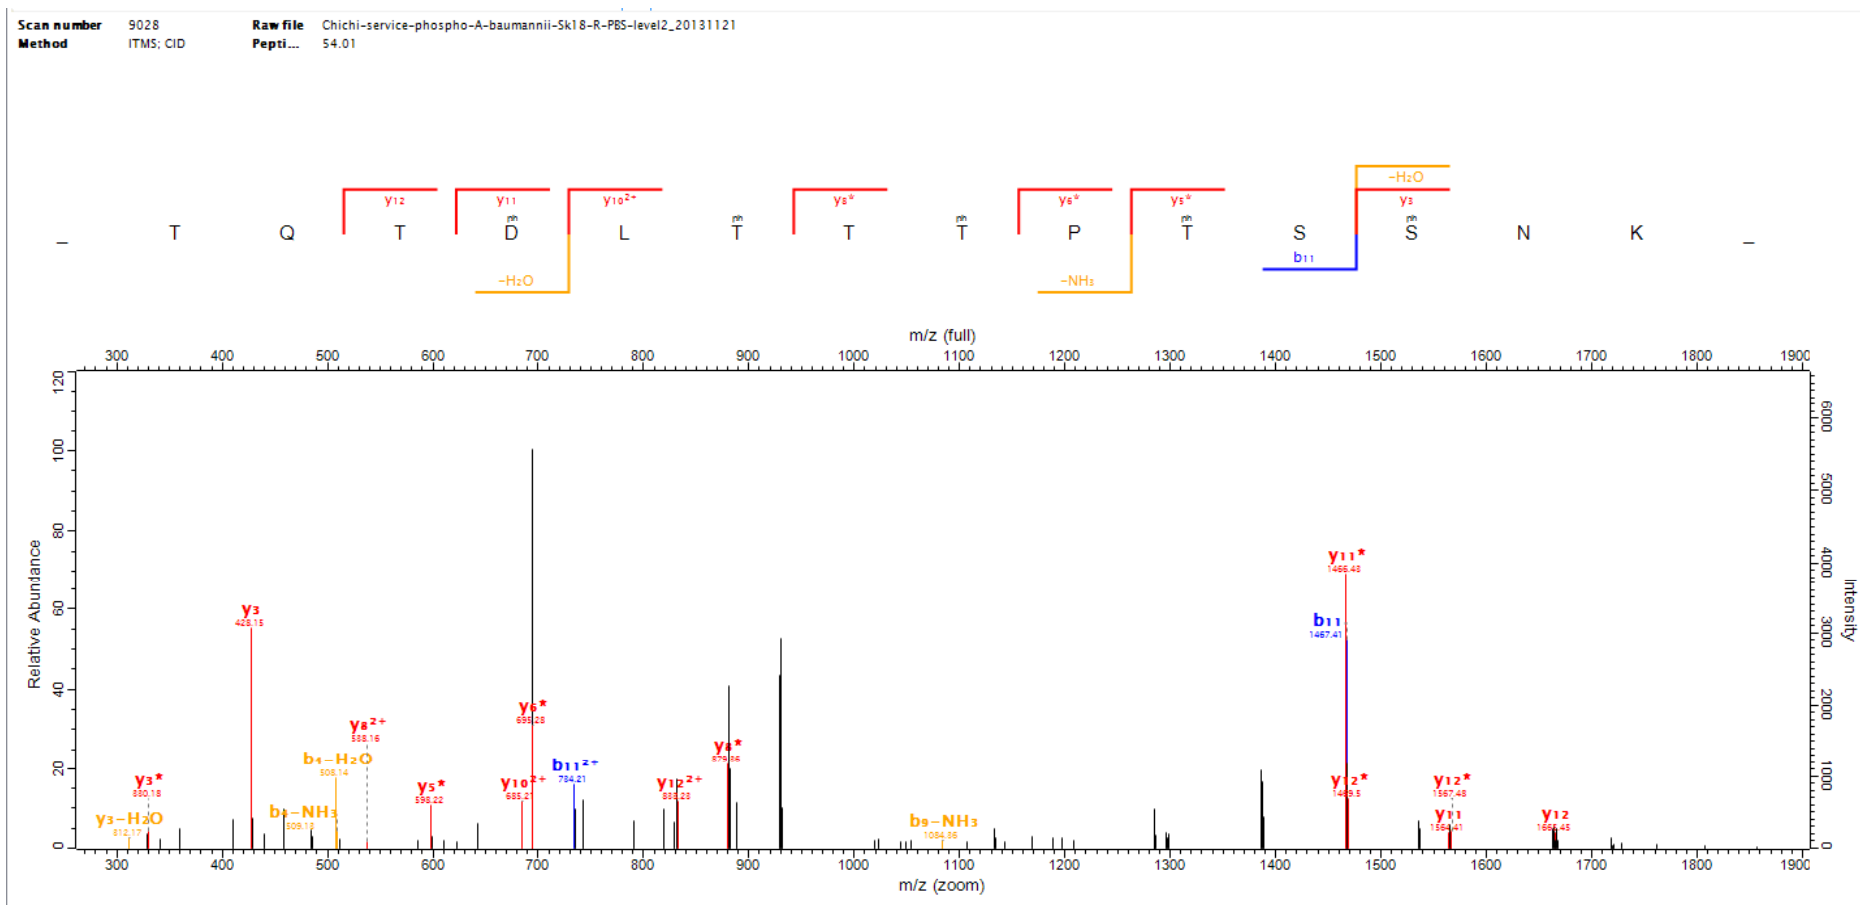

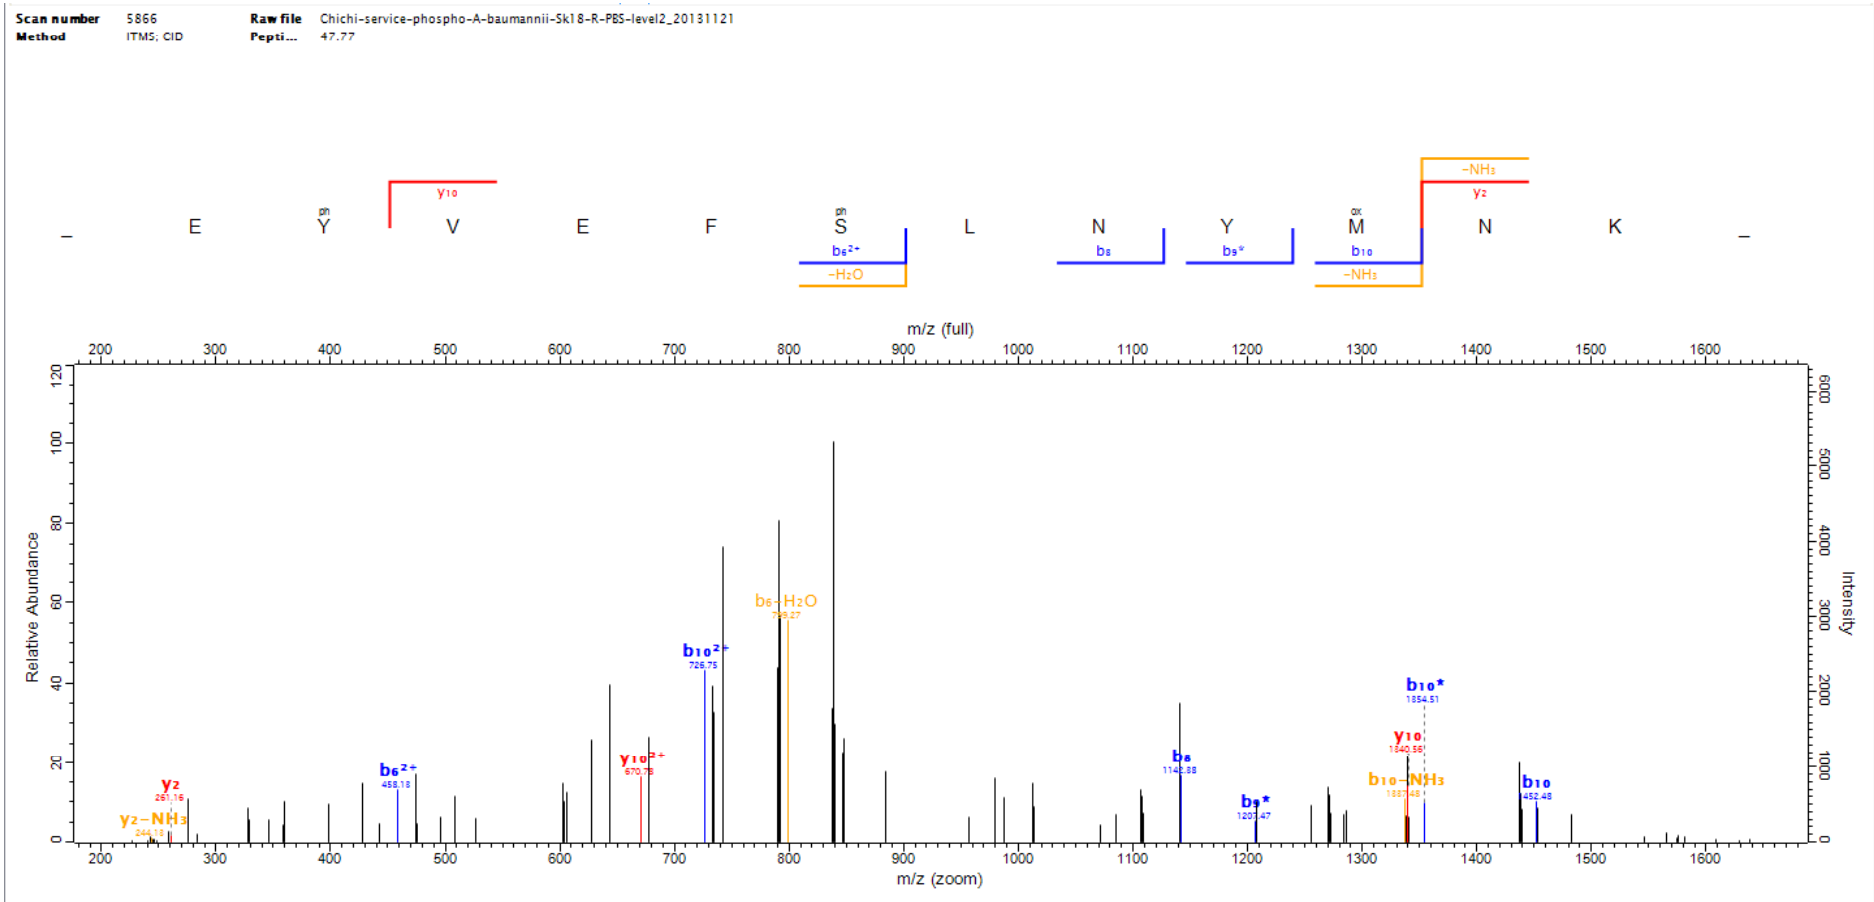

150

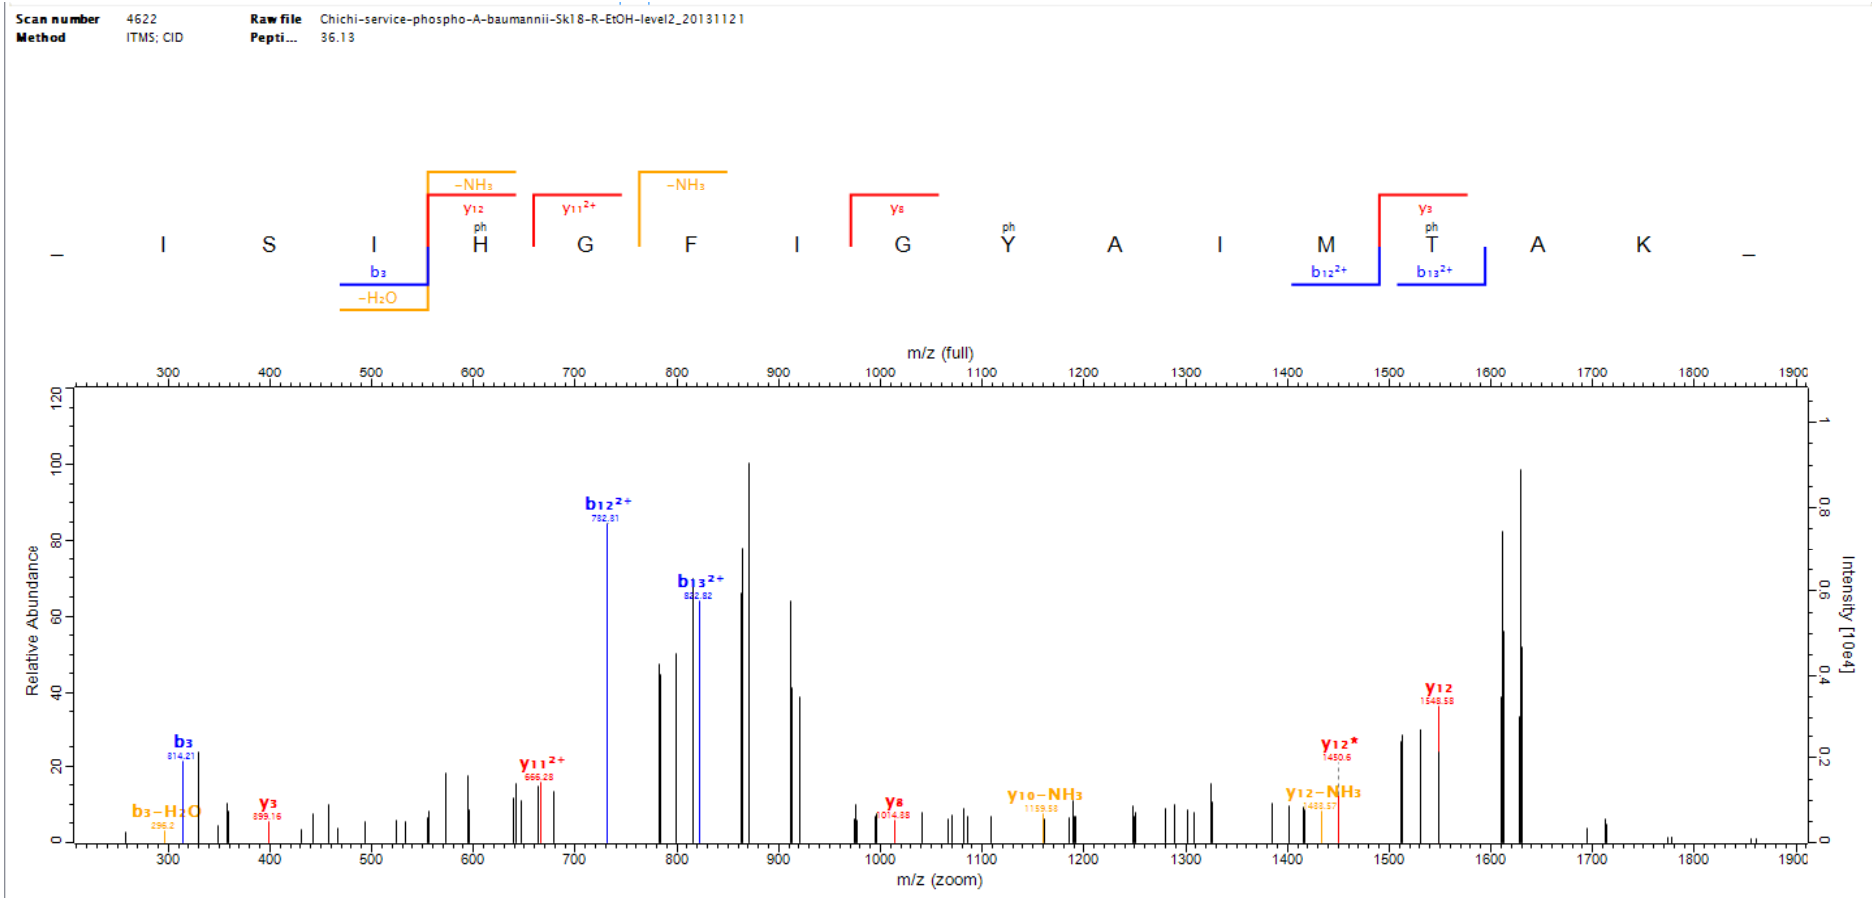

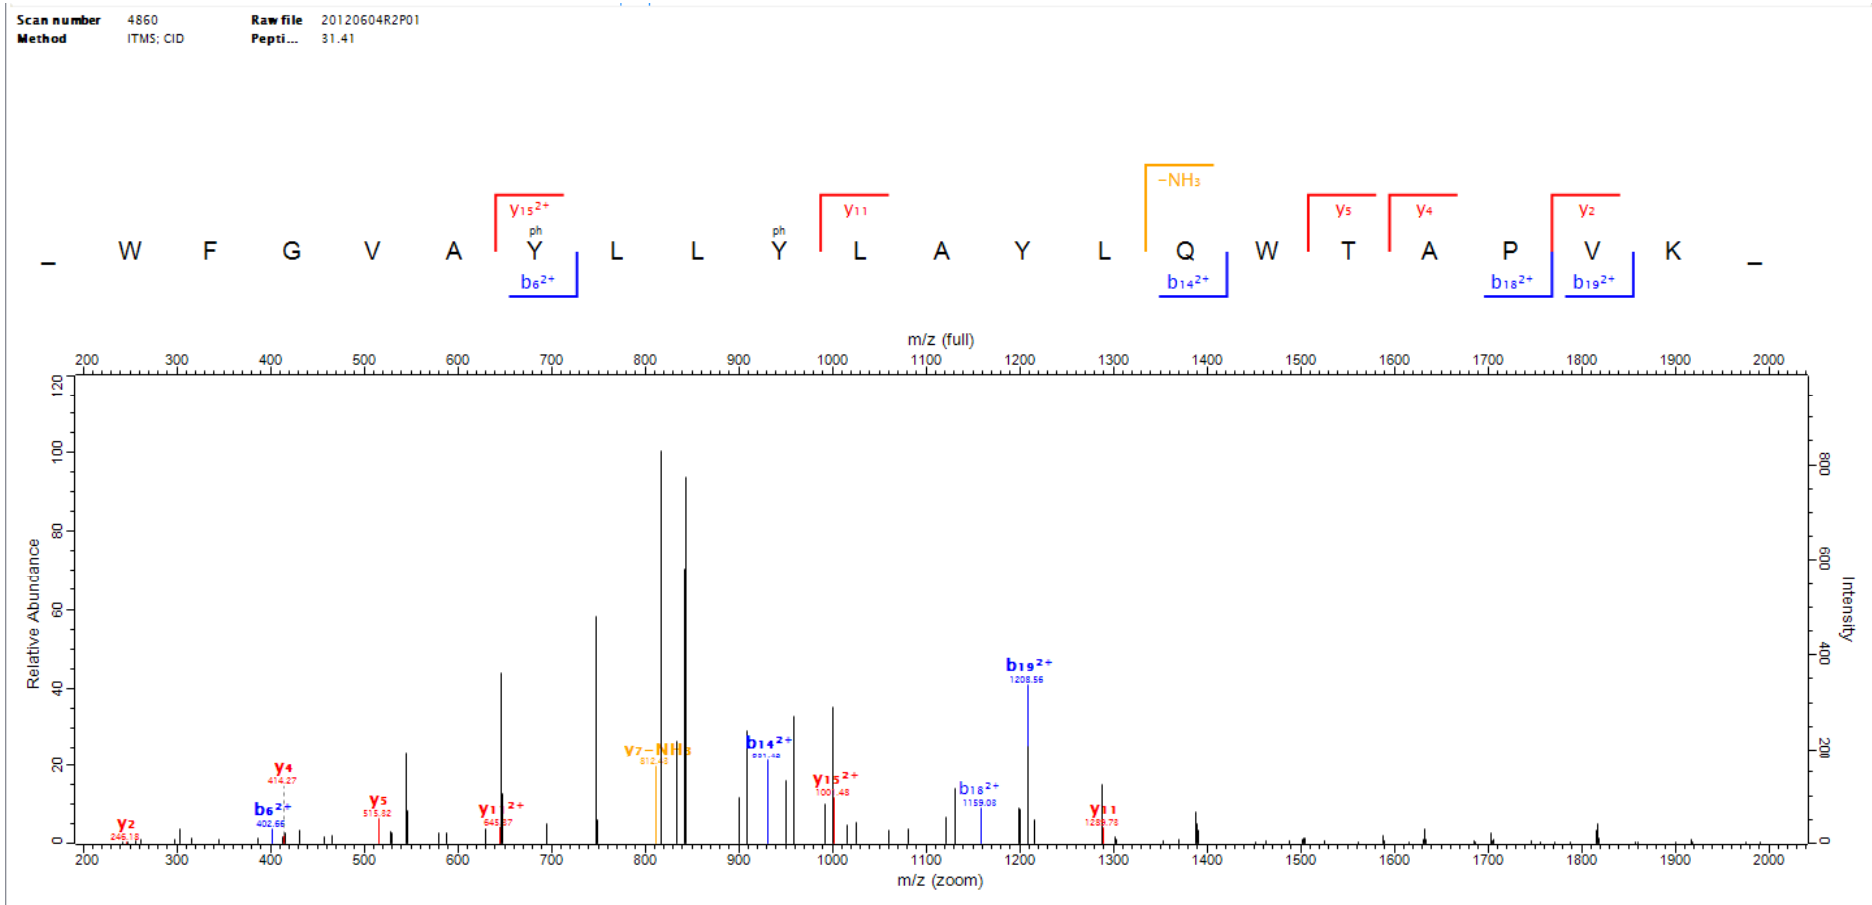

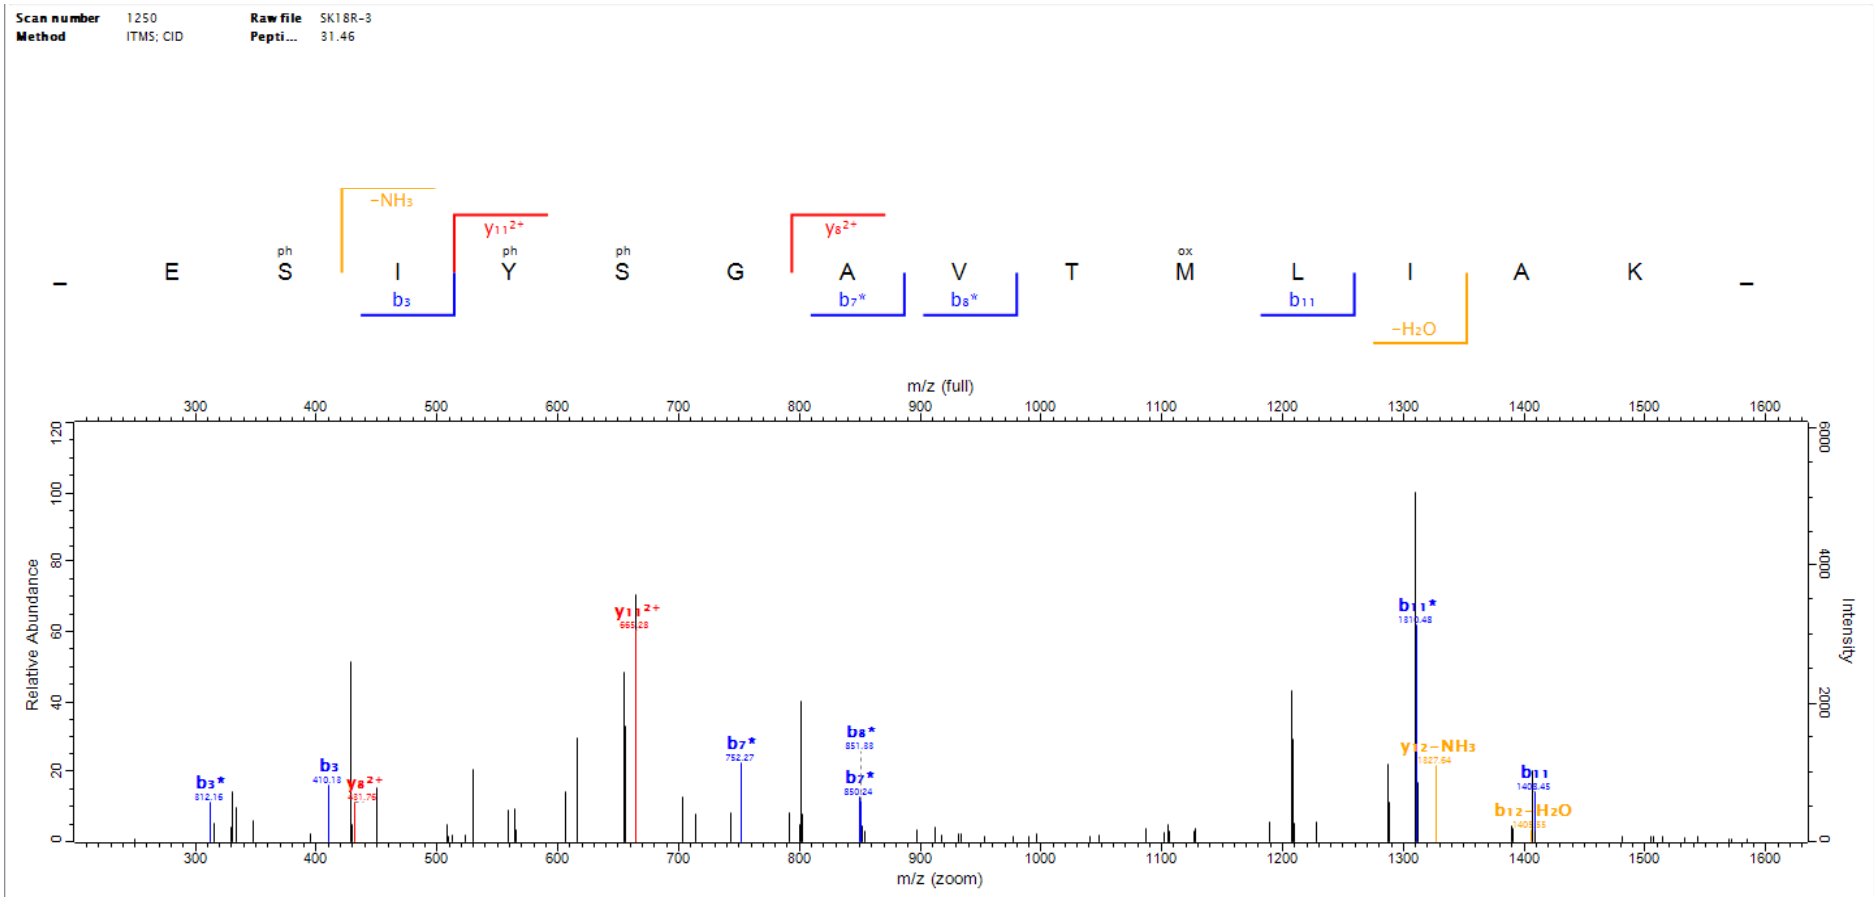

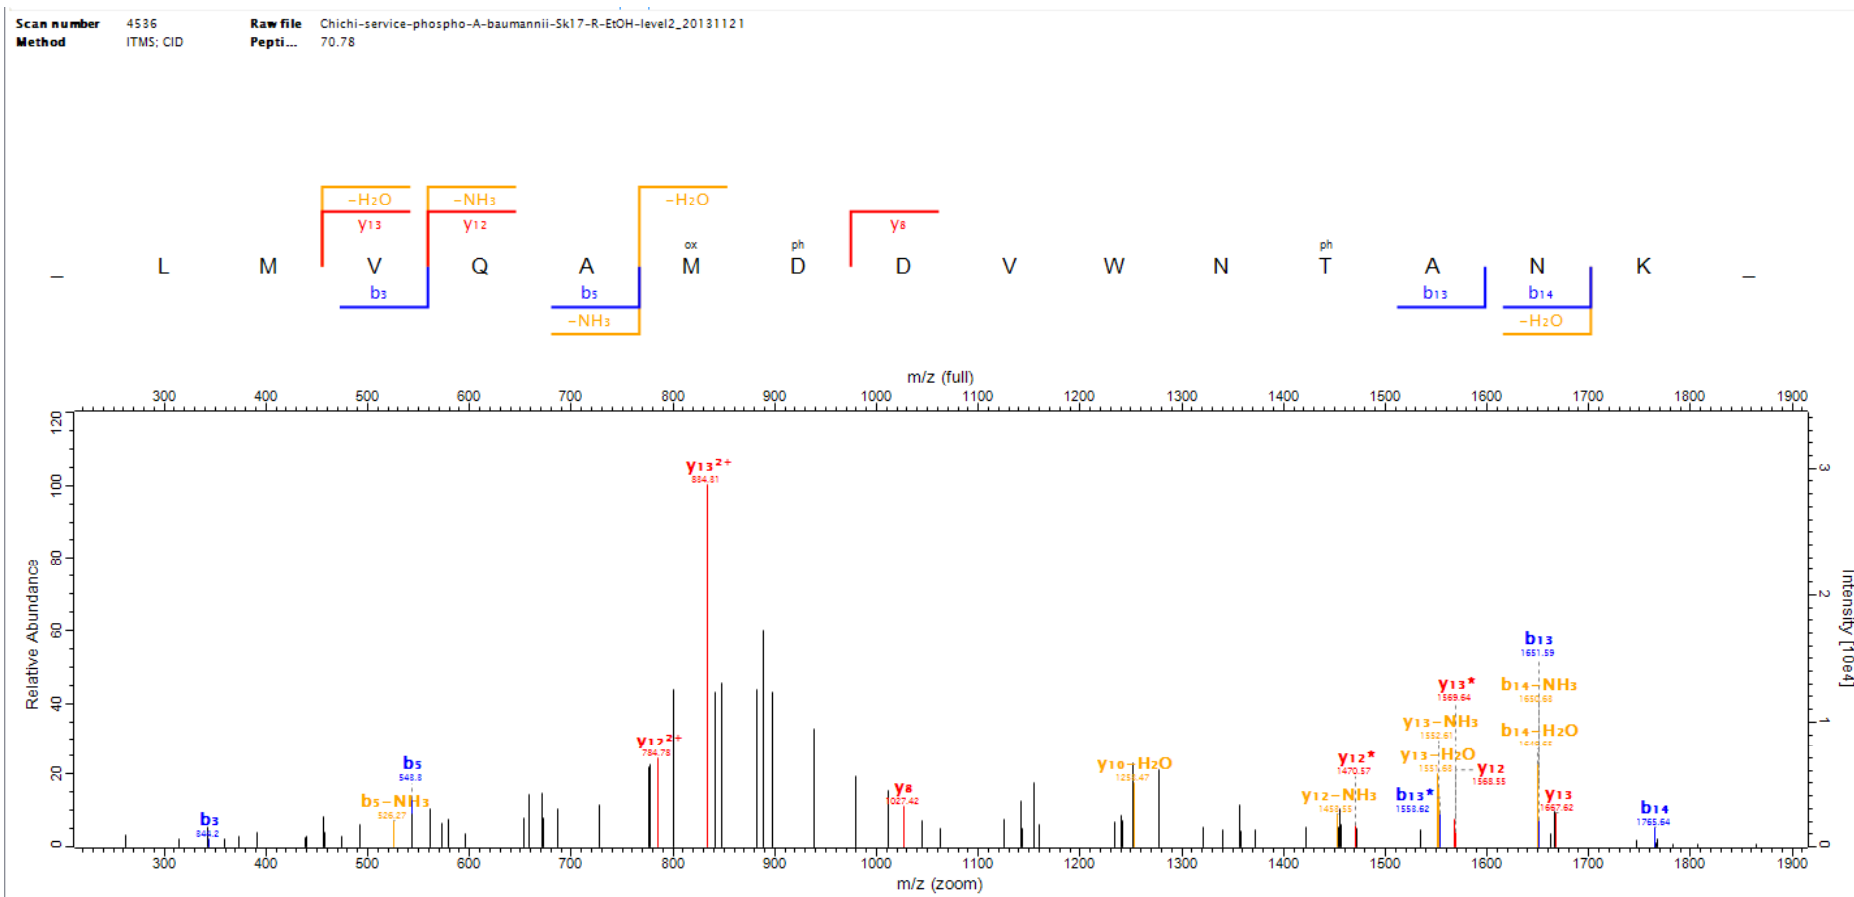

154

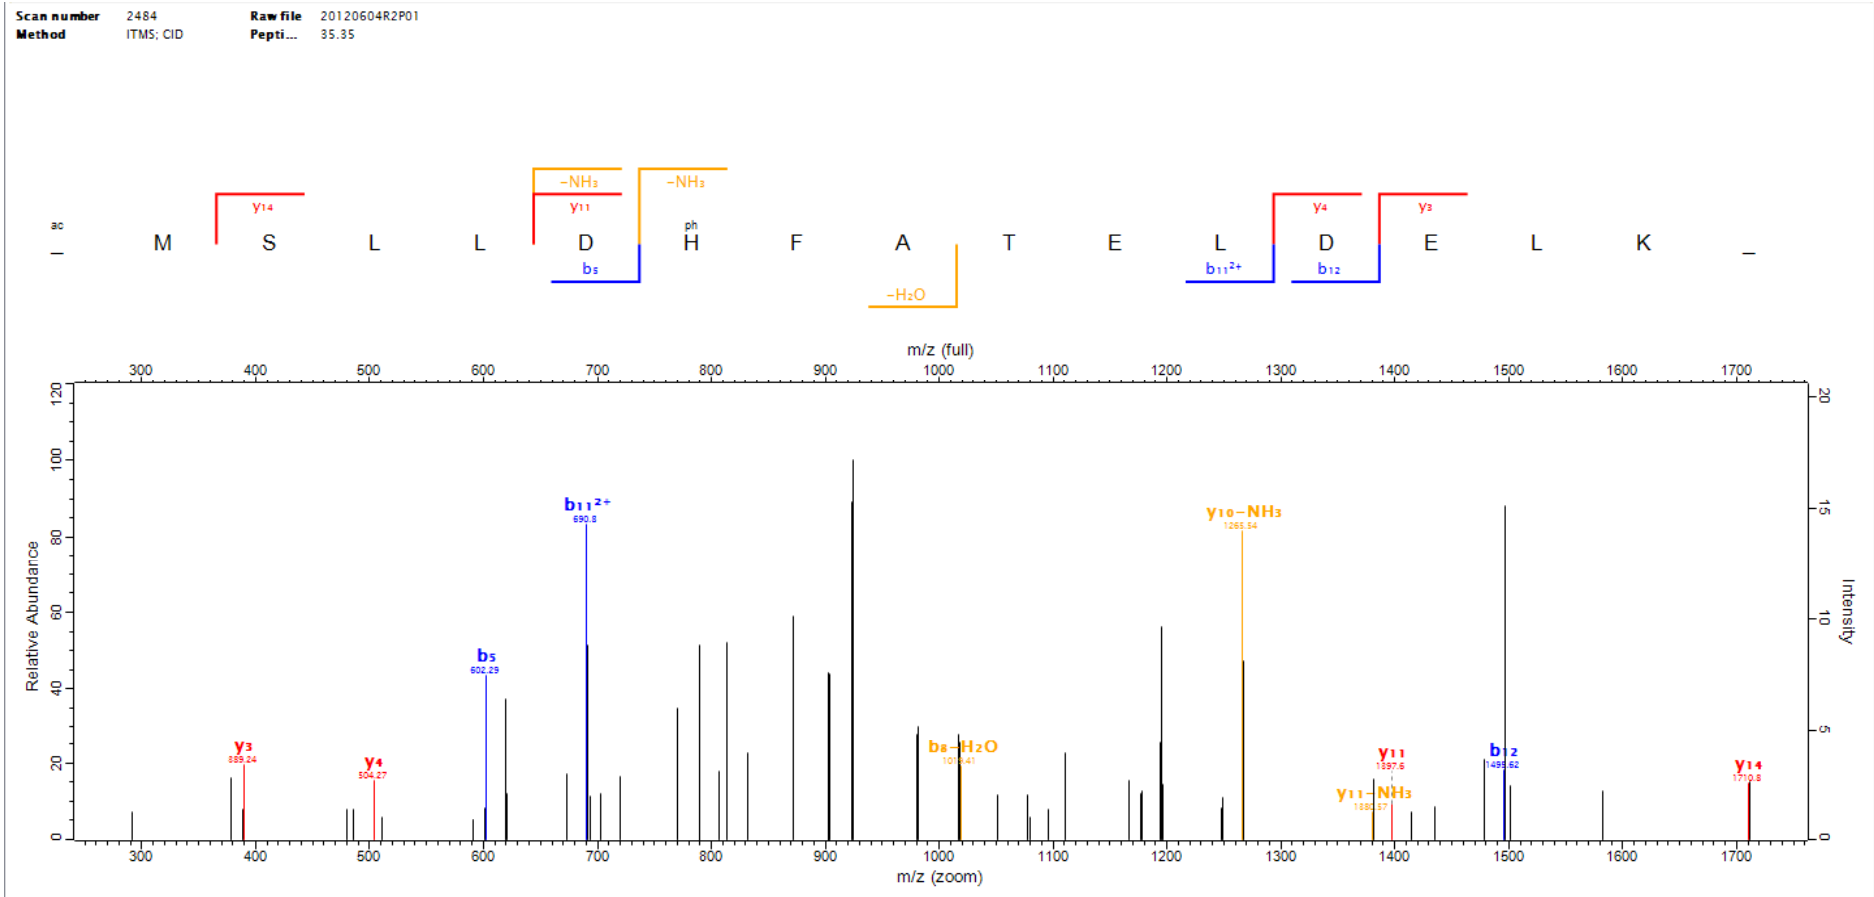

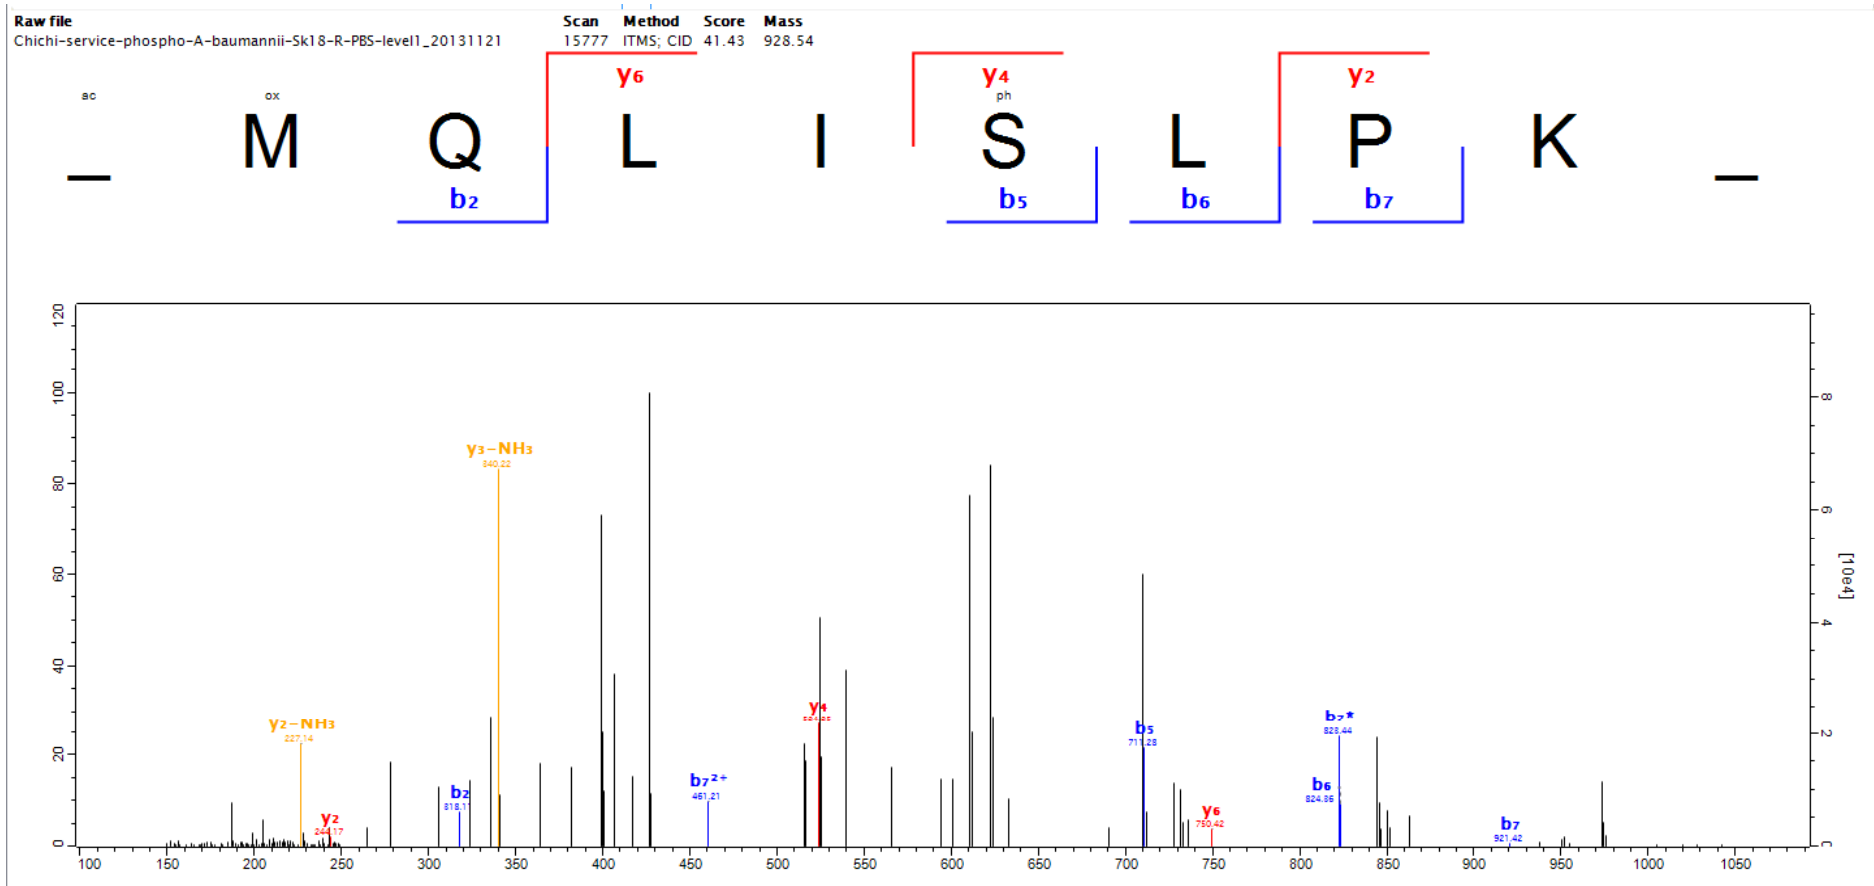



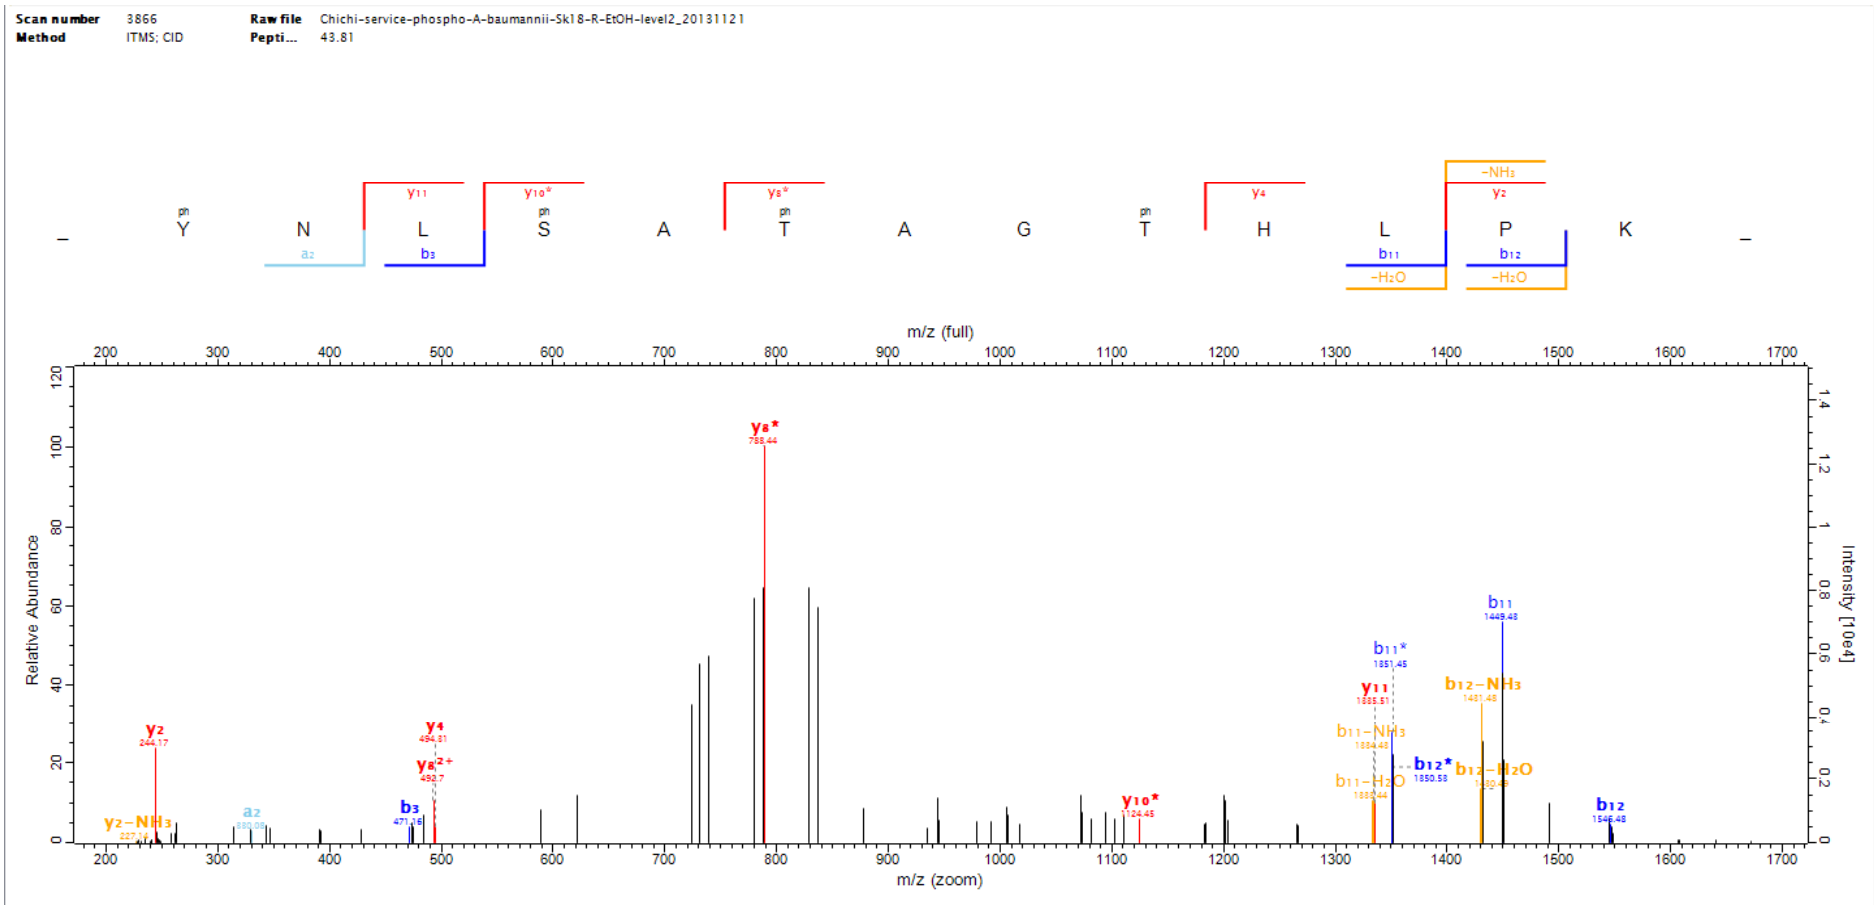

Scan number 2383 Raw file 18R-1  
 Method ITMS: CID Pepti... 42.82

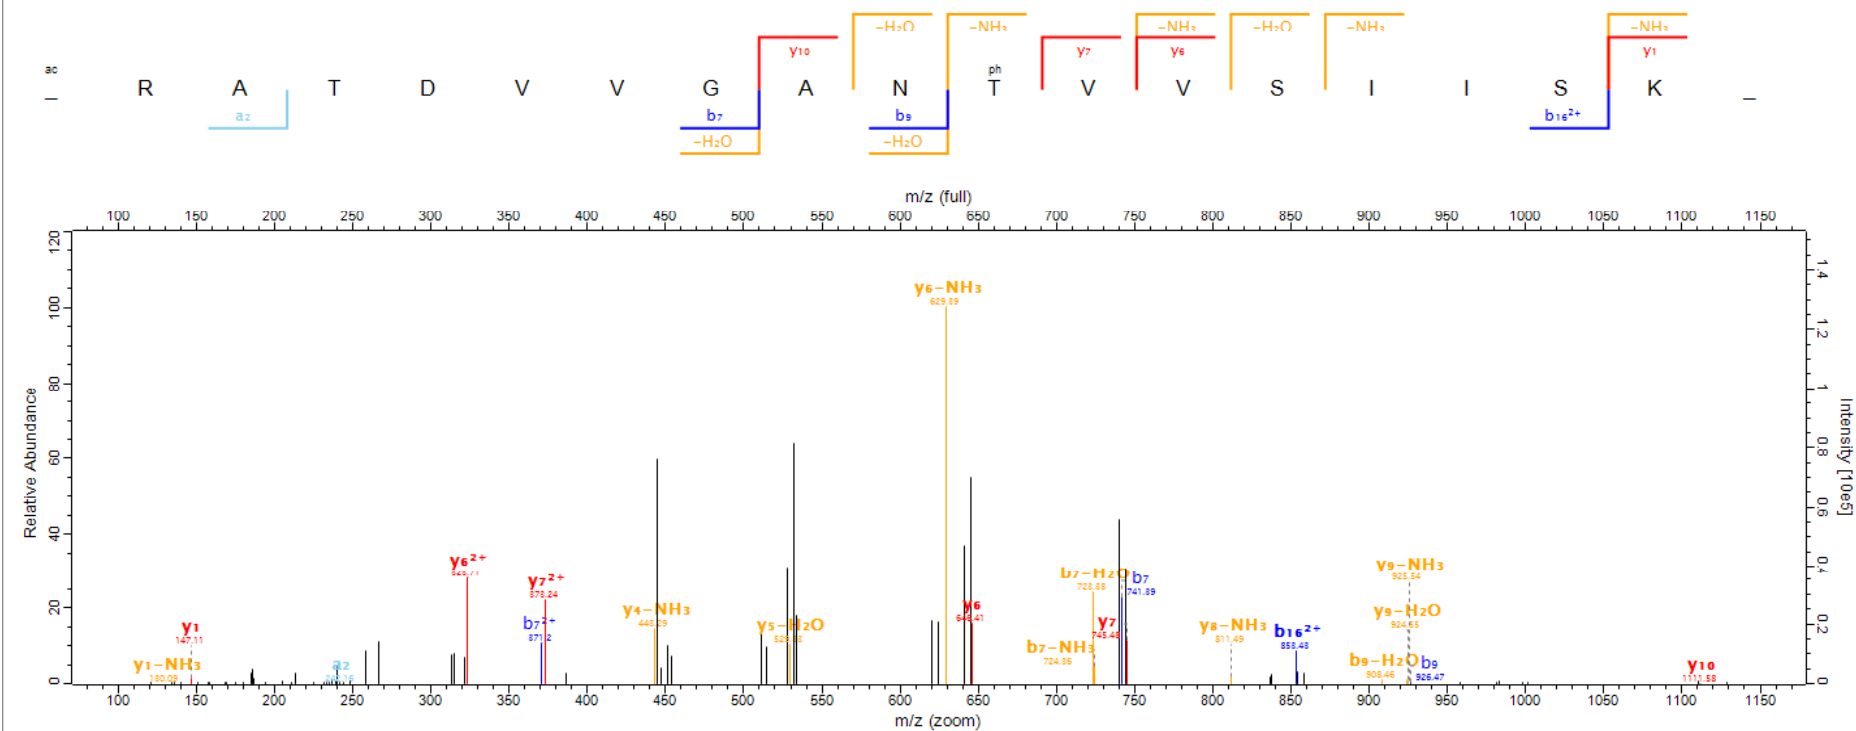

Scan number 14434 Raw file Chichi-service-phospho-A-baumannii-Sk17-R-EtOH-level1\_20131121  
 Method ITMS; CID Peptide 67.45

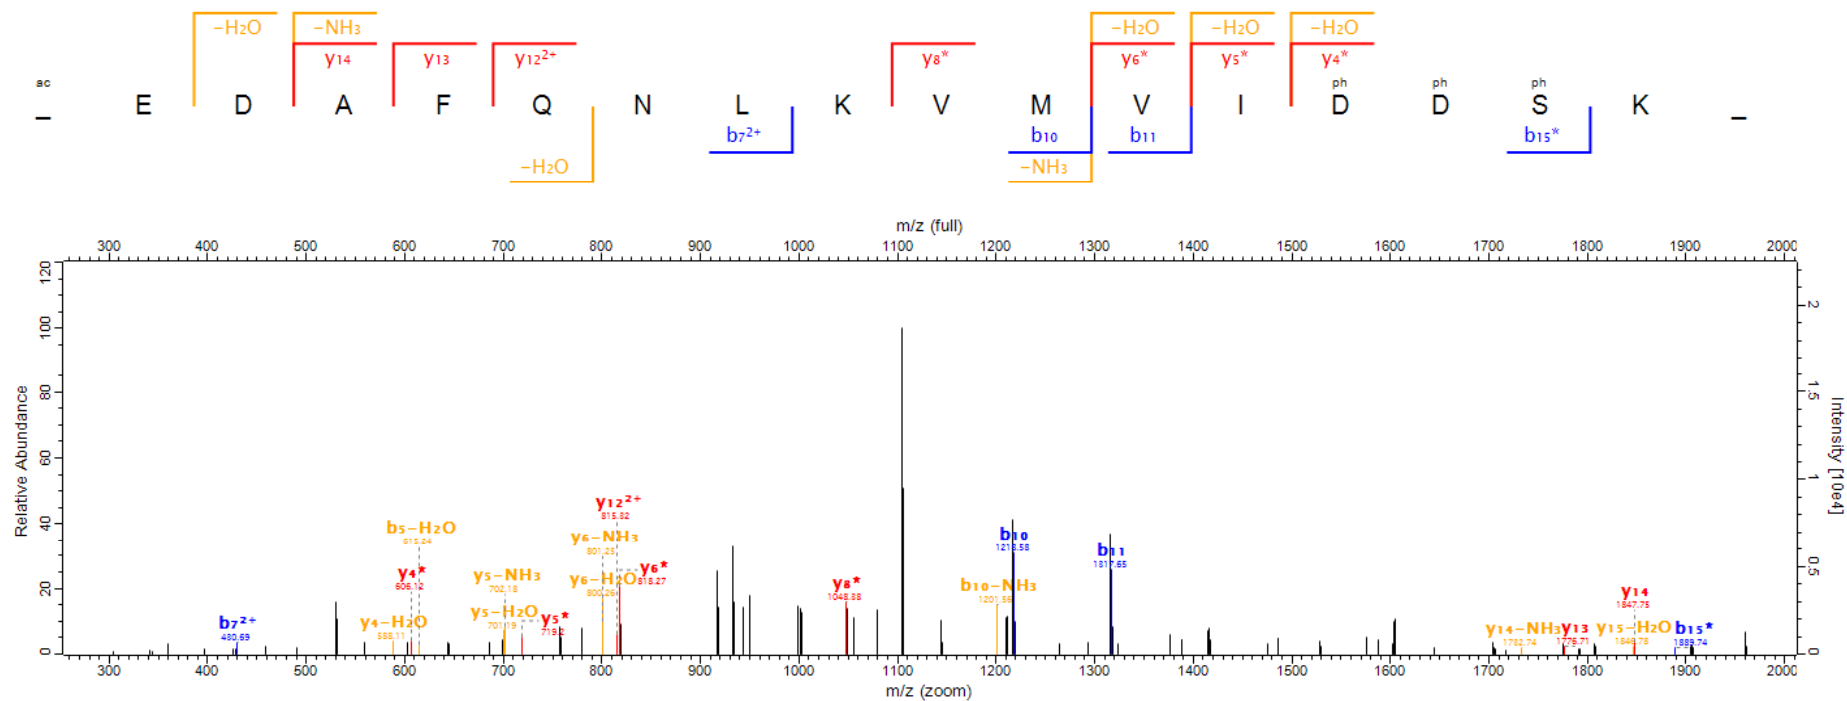

Scan number 16479 Raw file Chichi-service-phospho-A-baumannii-Sk17-R-EtOH-level2\_20131121  
 Method ITMS; CID Pepti... 36.19

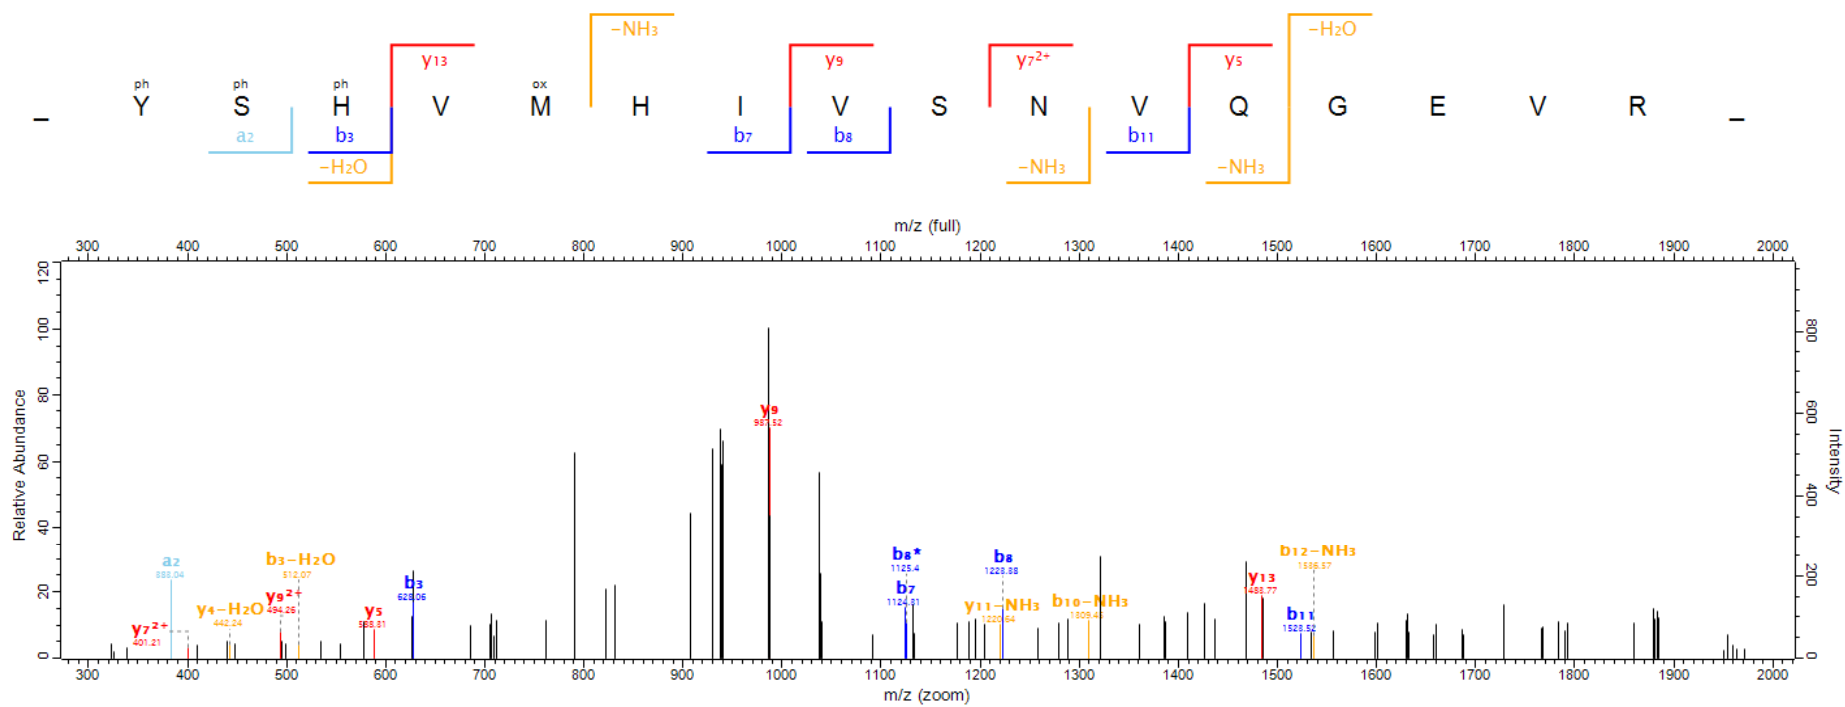

160

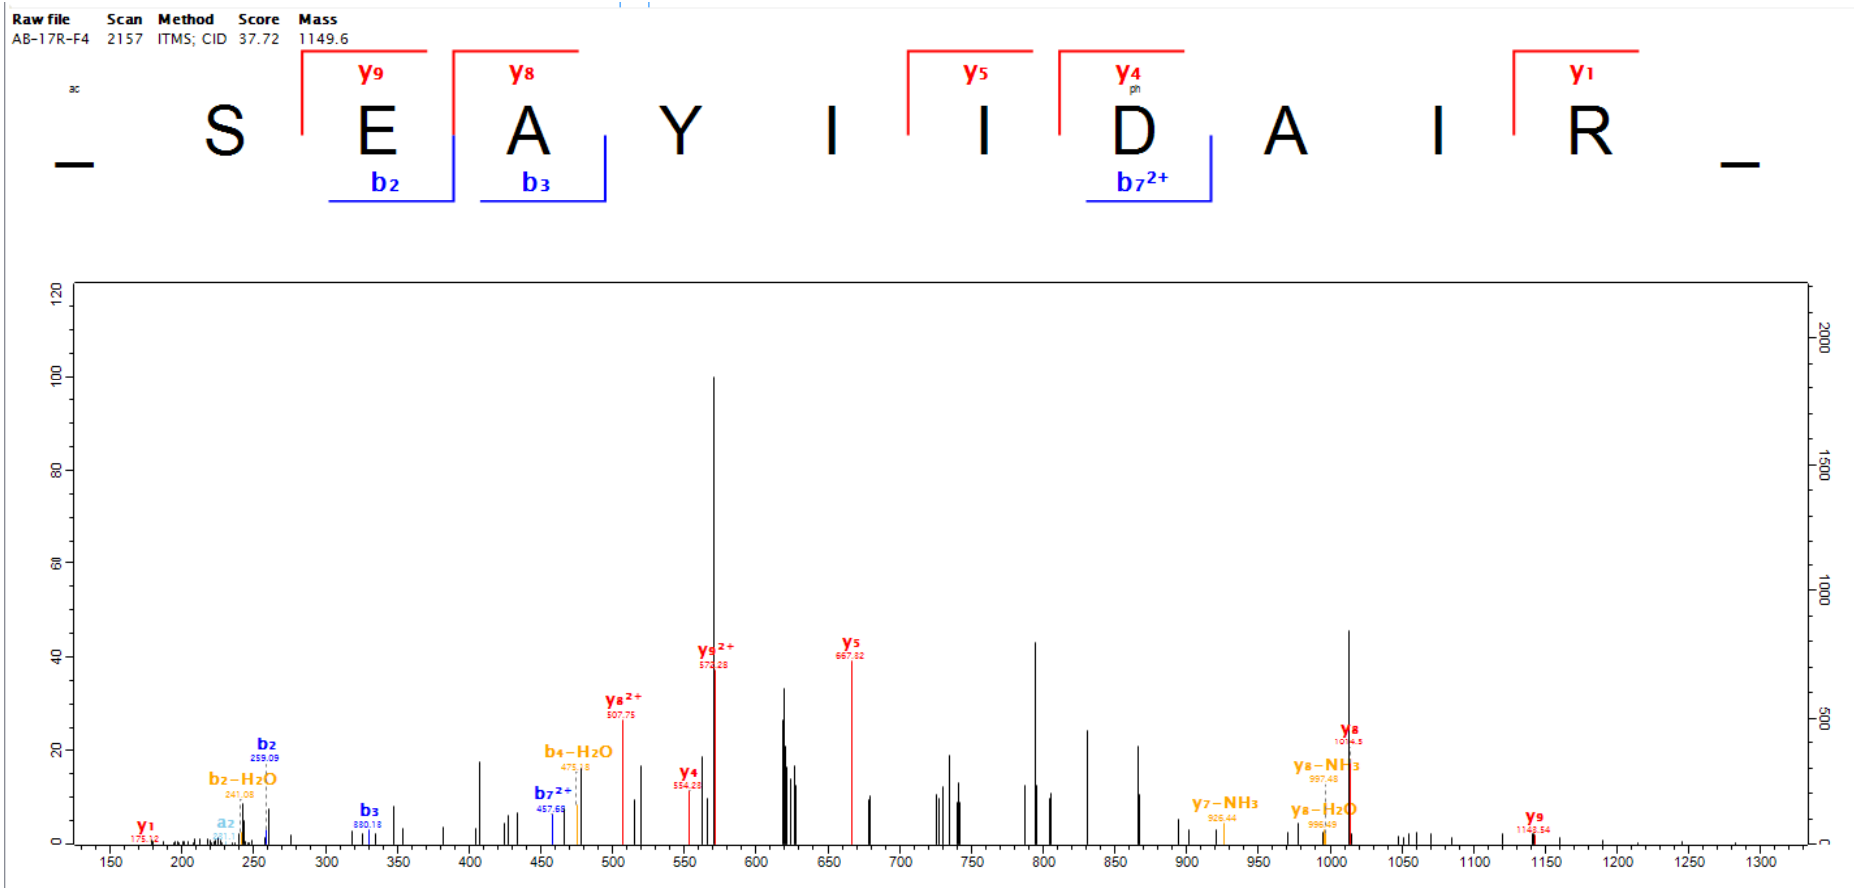

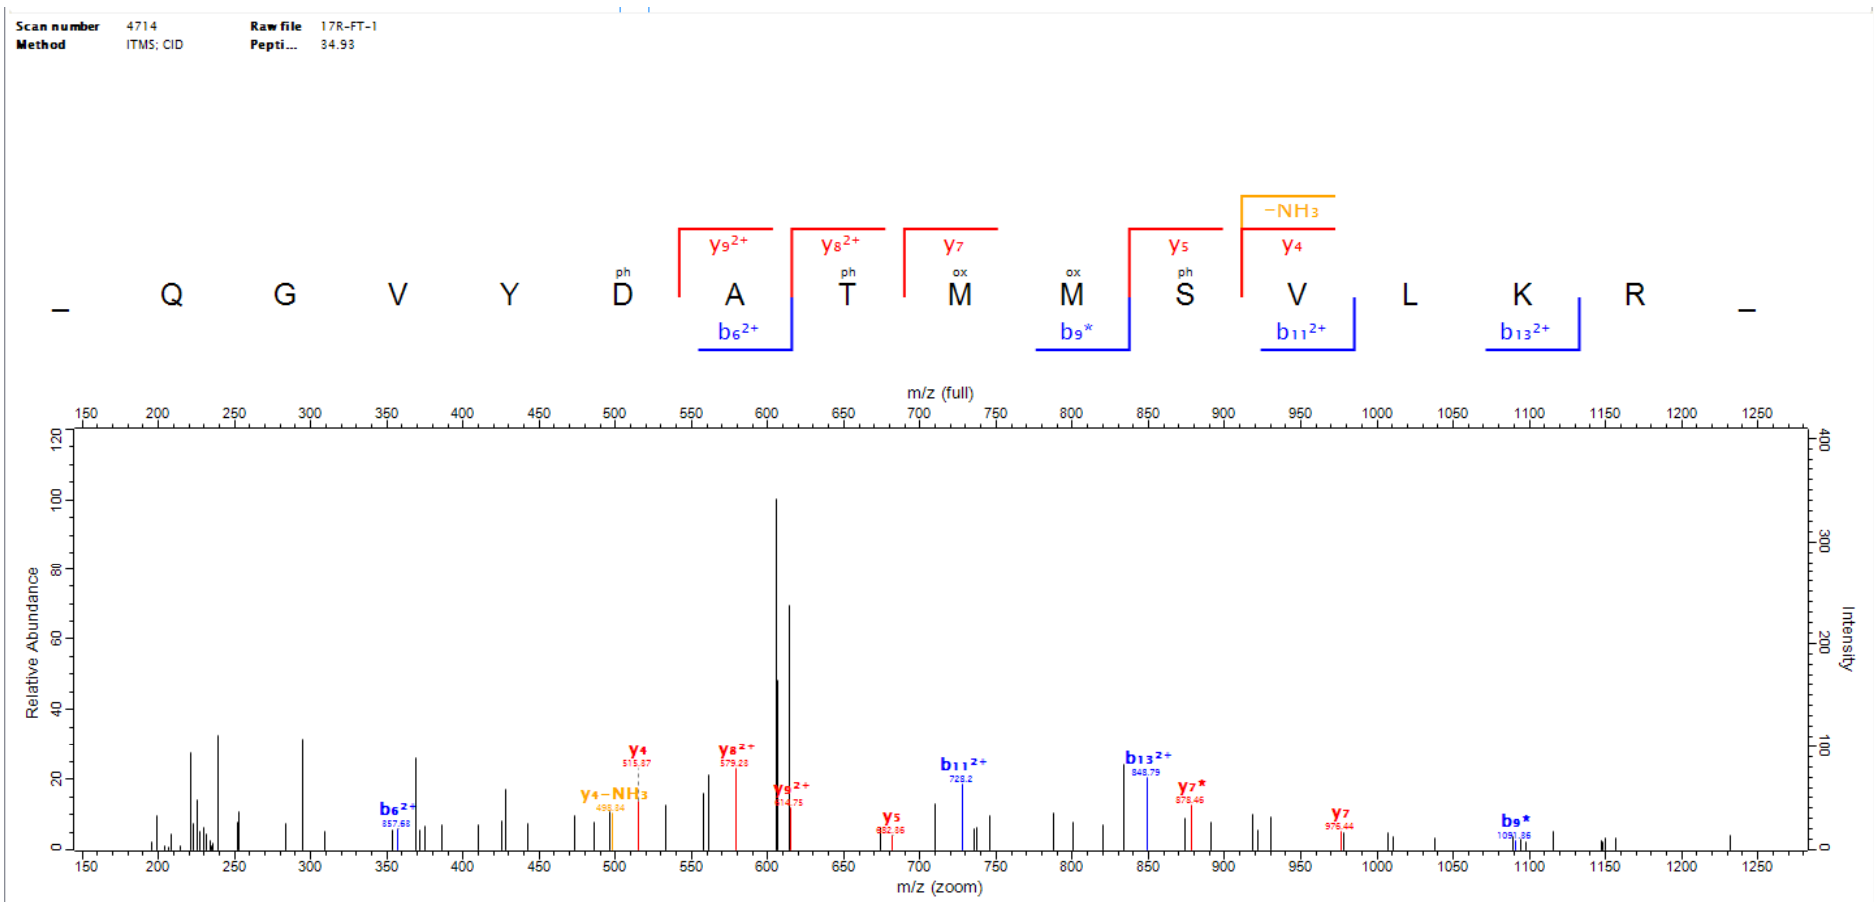

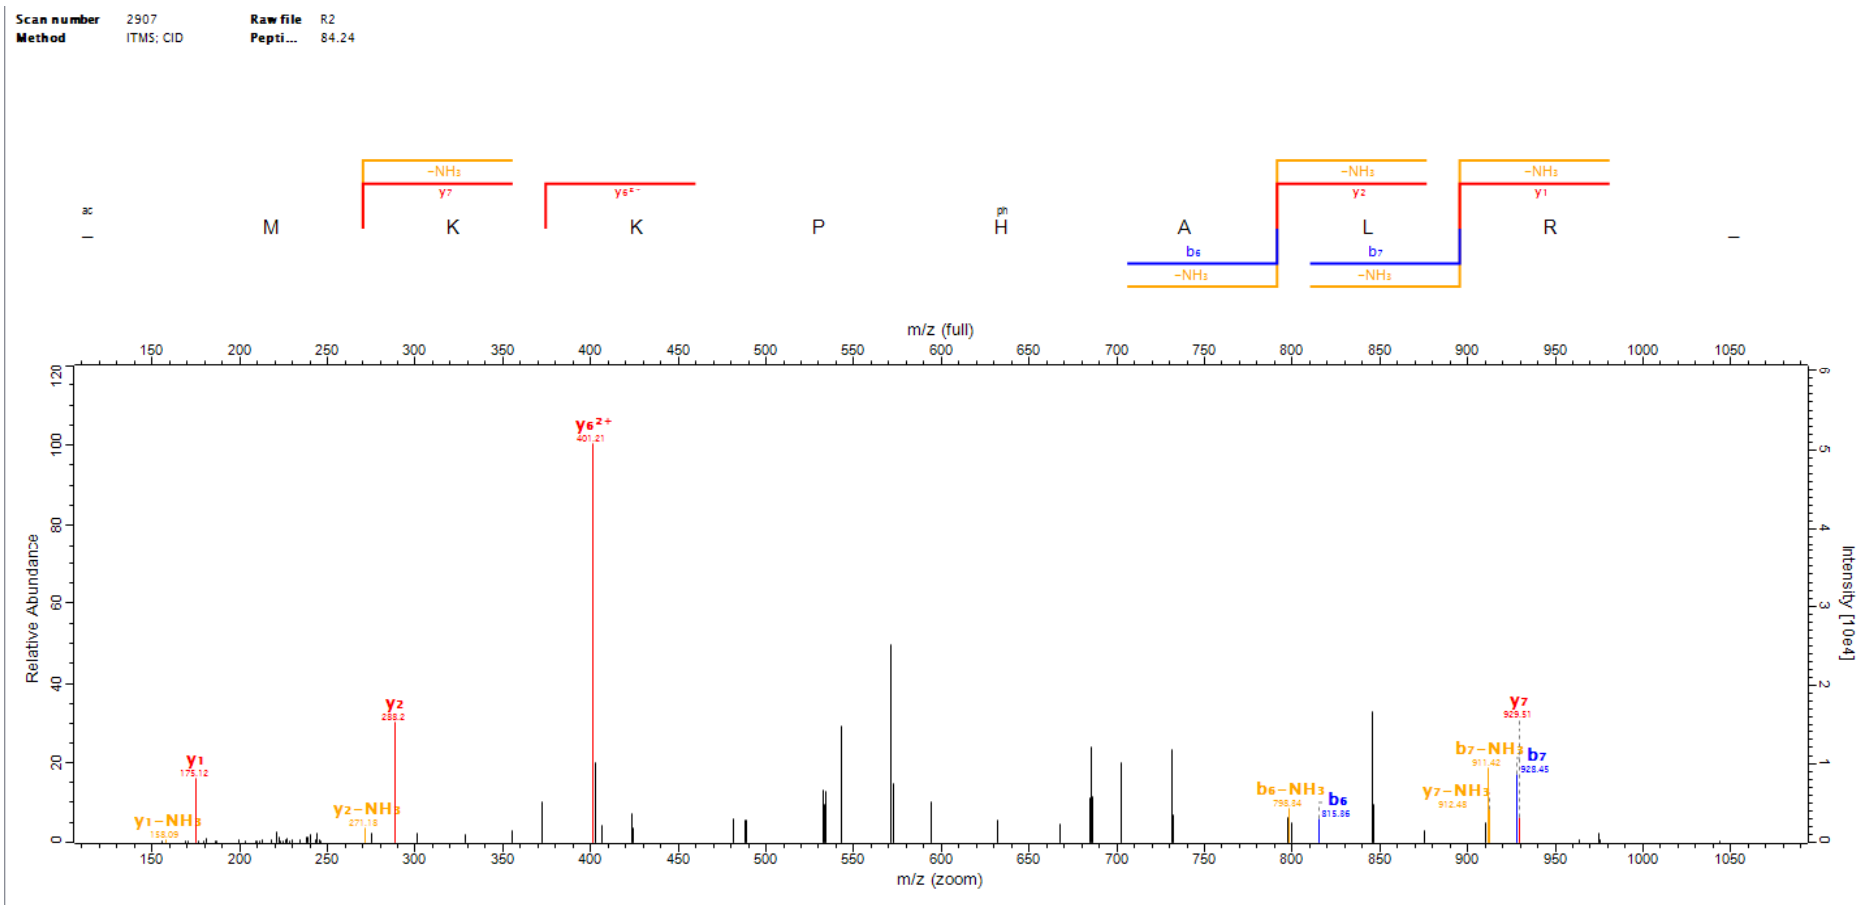

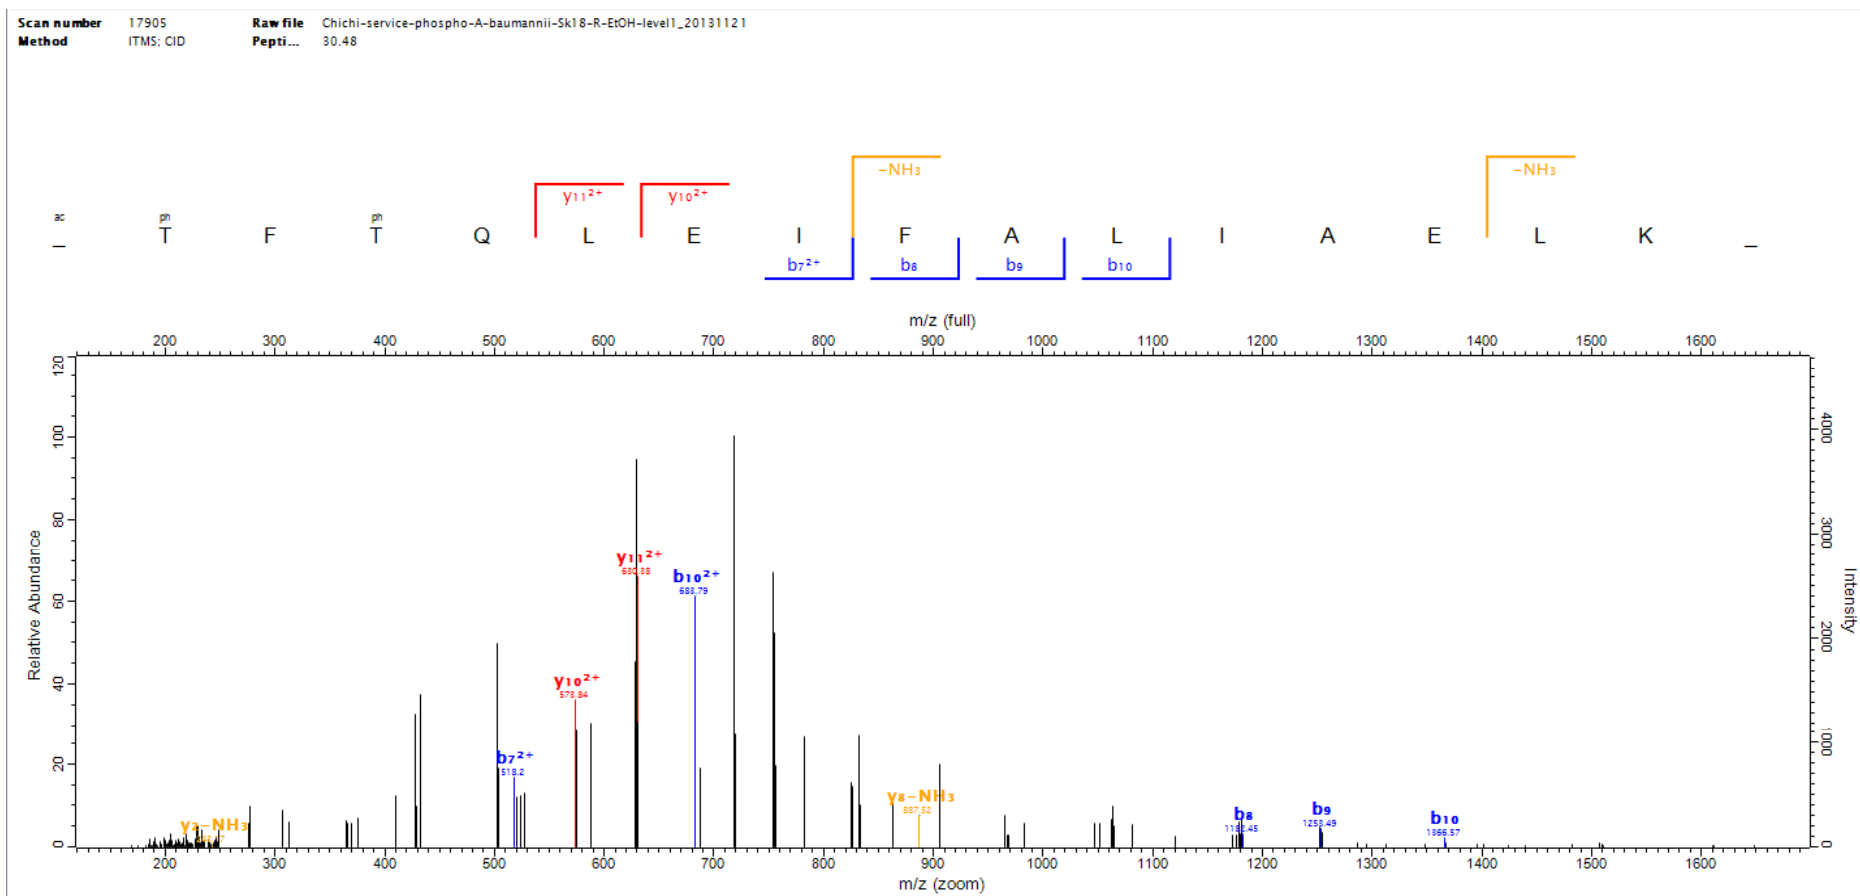



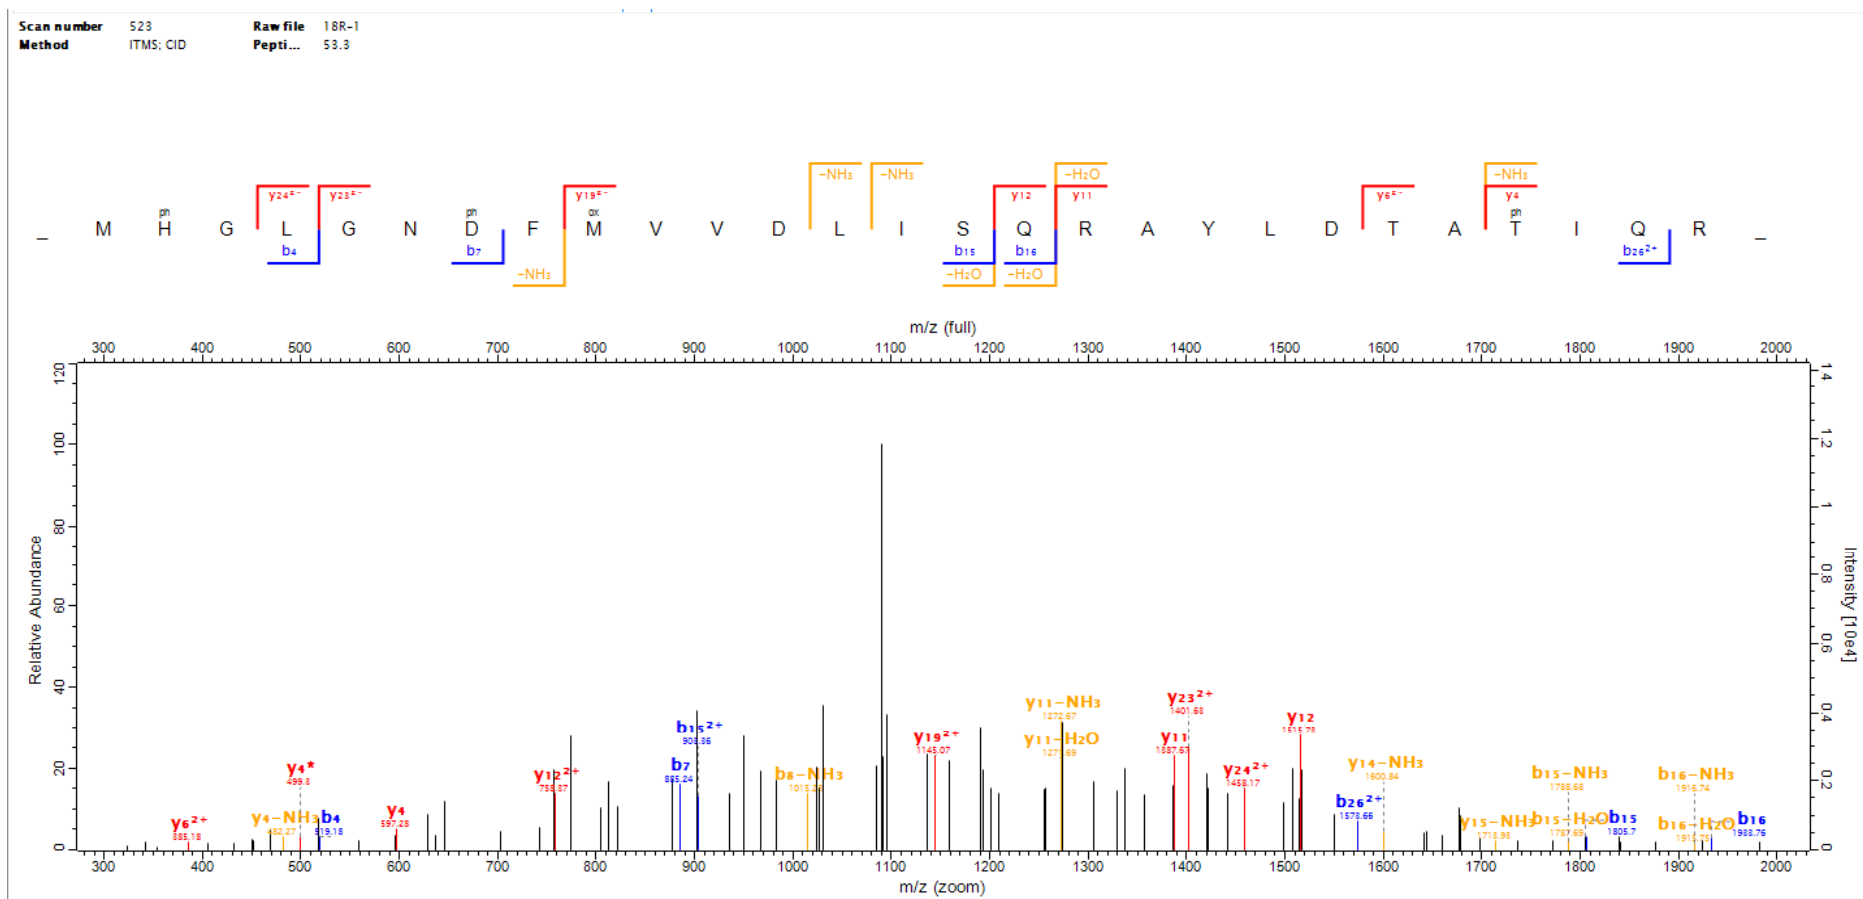

Scan number 18891 Raw file Chichi-service-phospho-A-baumannii-Sk17-R-EtOH-level1\_20131121  
Method ITMS; CID Pepti... 64.1

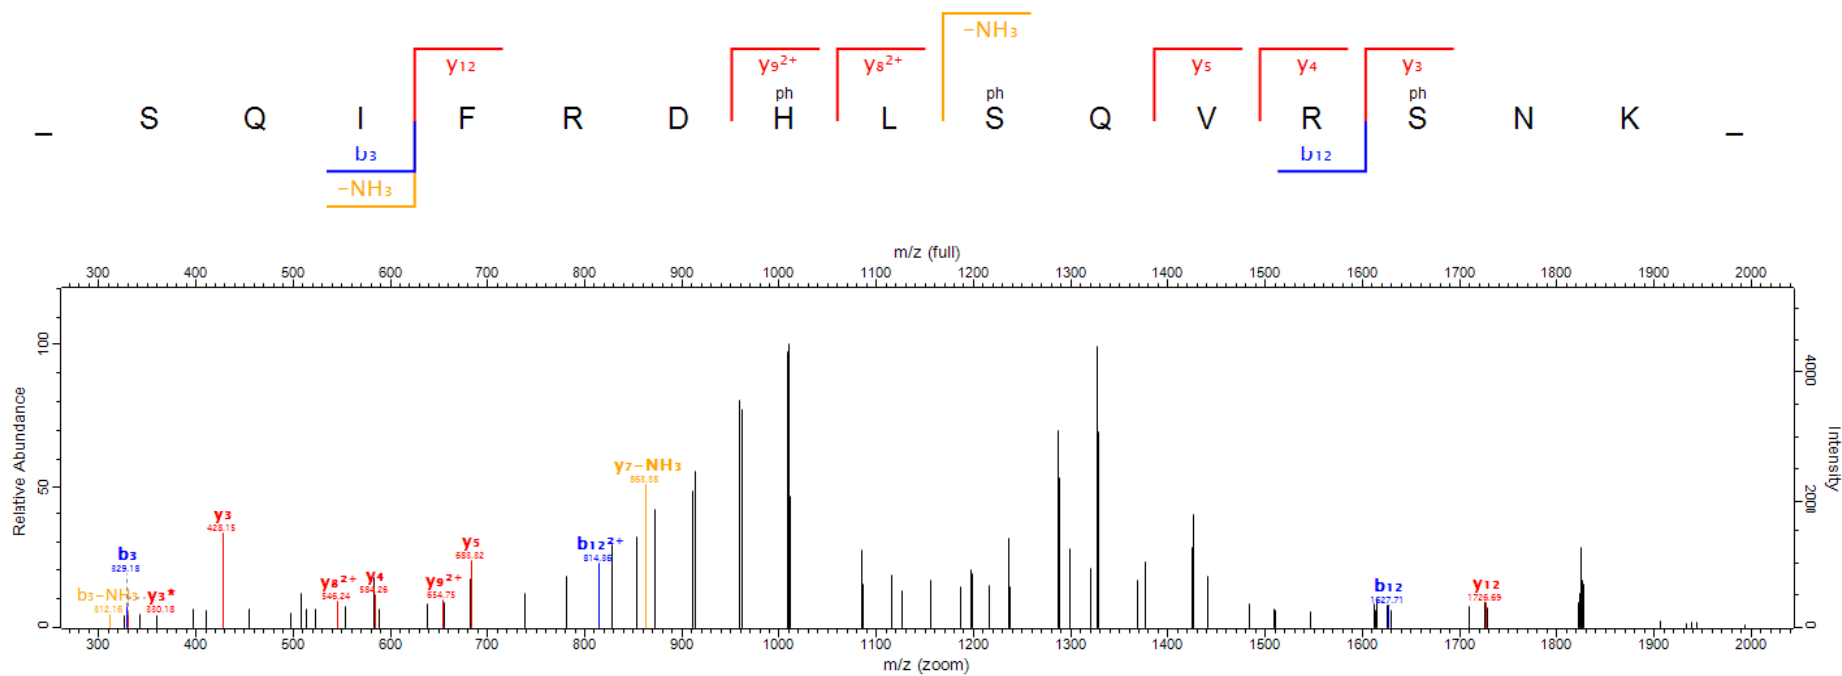

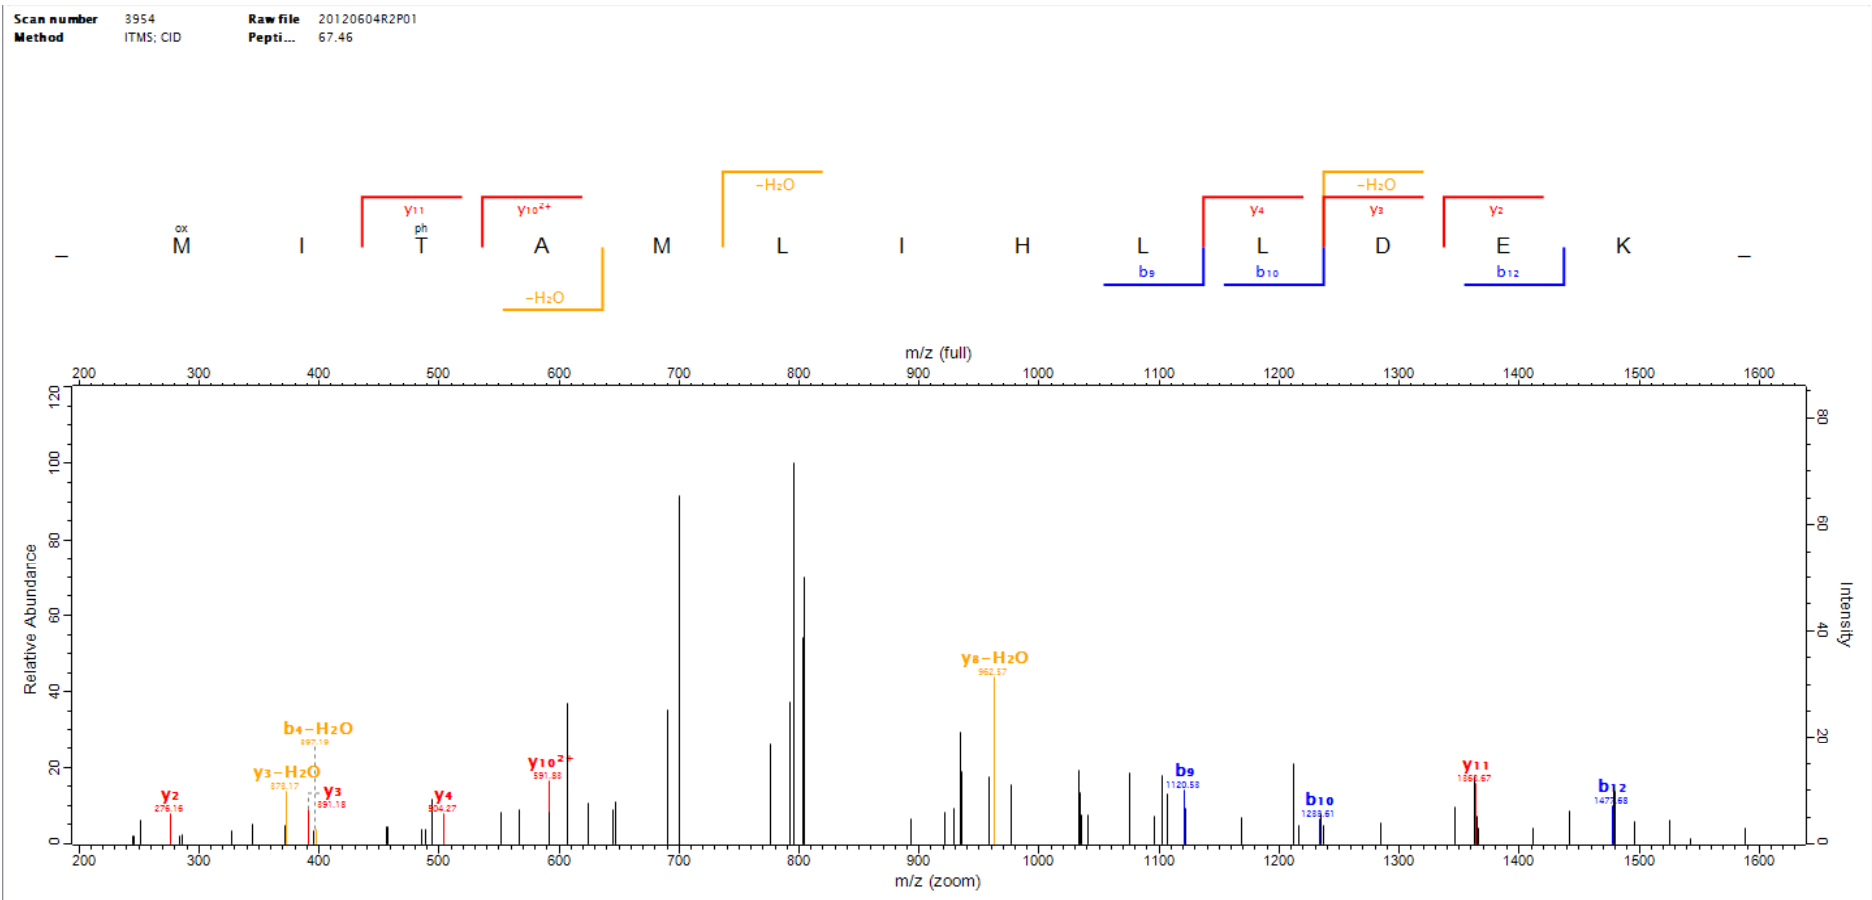

Scan number 7618 Raw file 20120521R301  
 Method ITMS; CID Pepti... 32.92

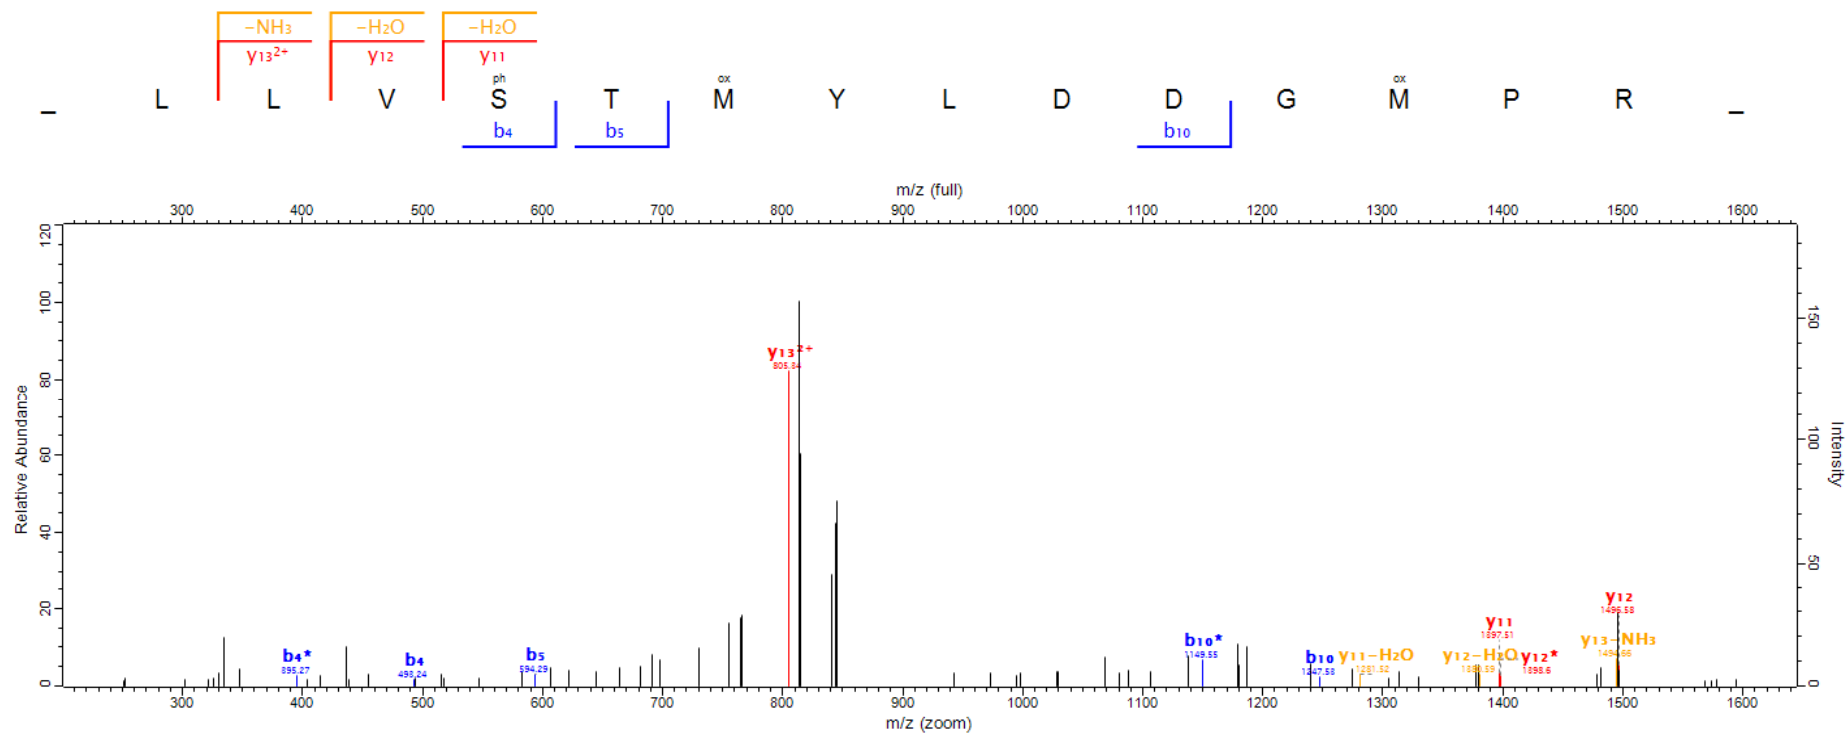

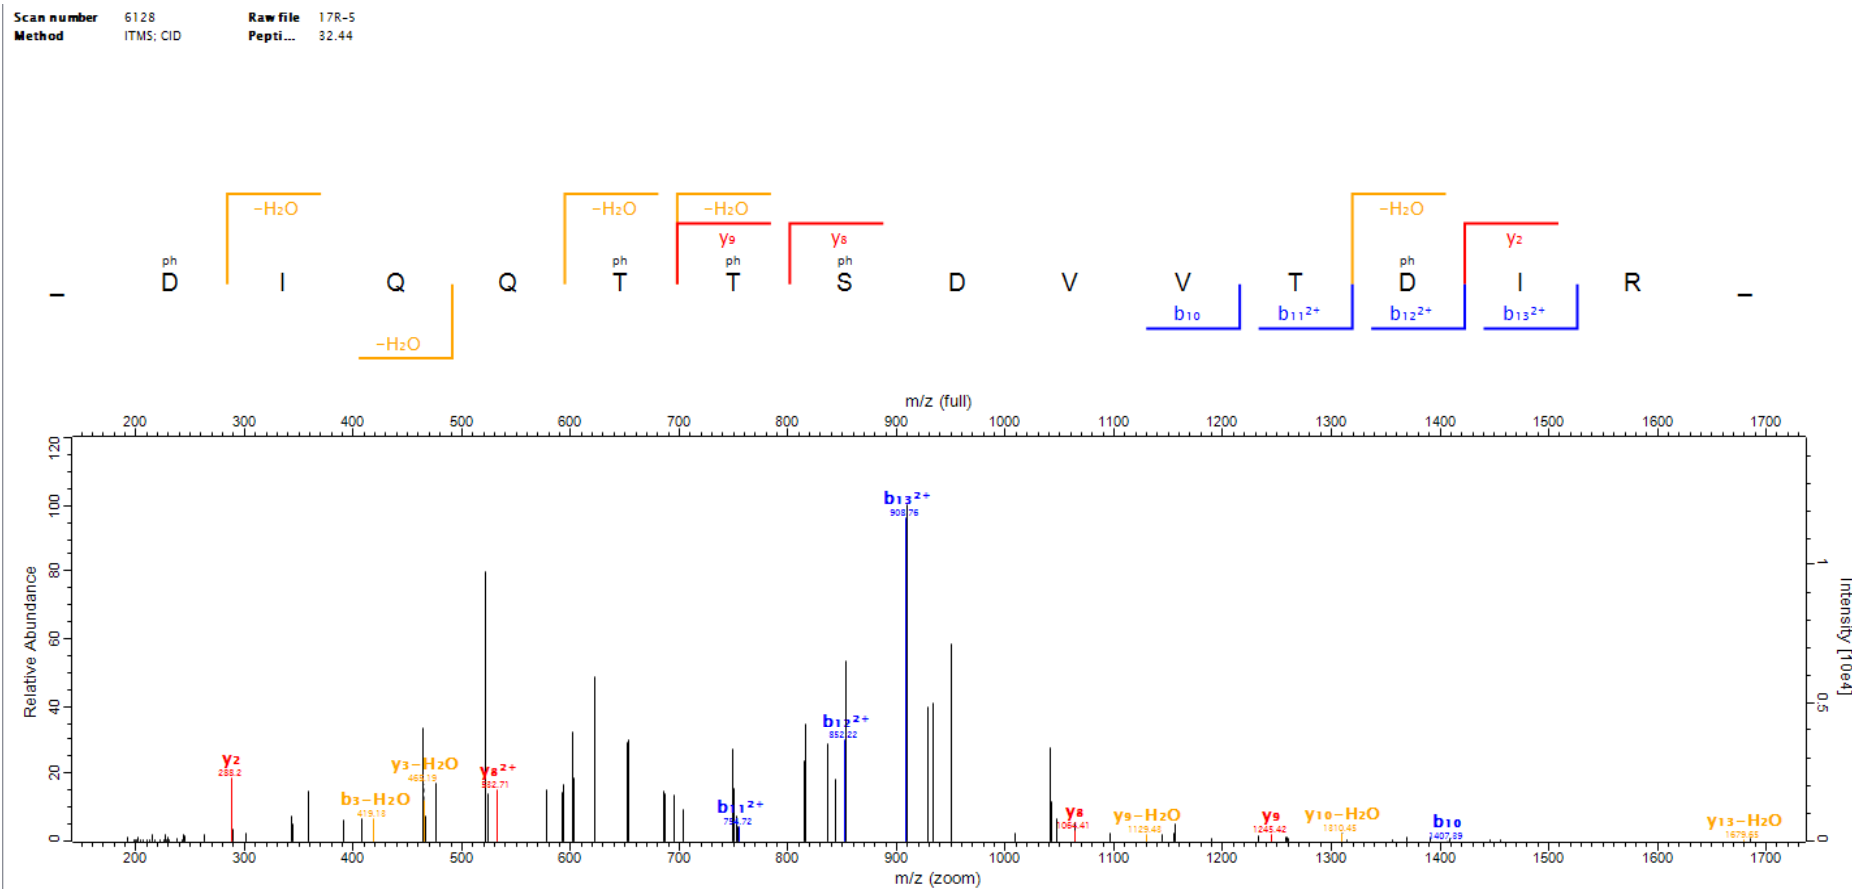



170

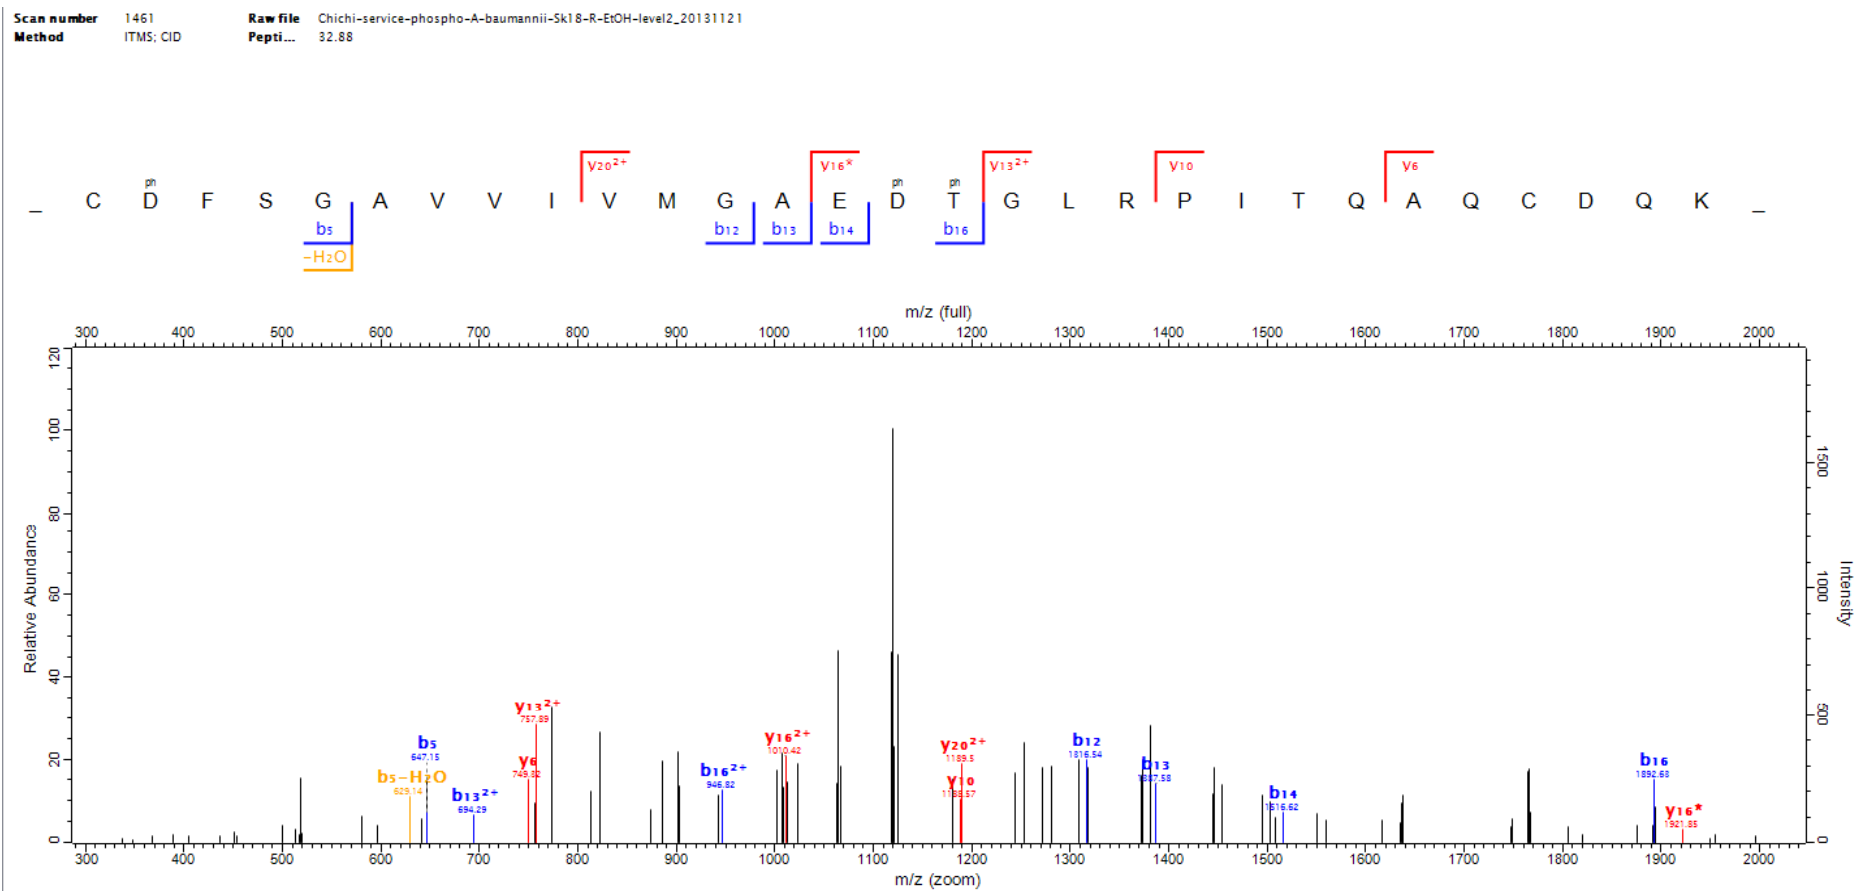

Scan number 8358 Raw file Chichi-service-phospho-A-baumannii-Sk17-R-PBS-level2\_20131121  
 Method ITMS; CID Peptide 65.47

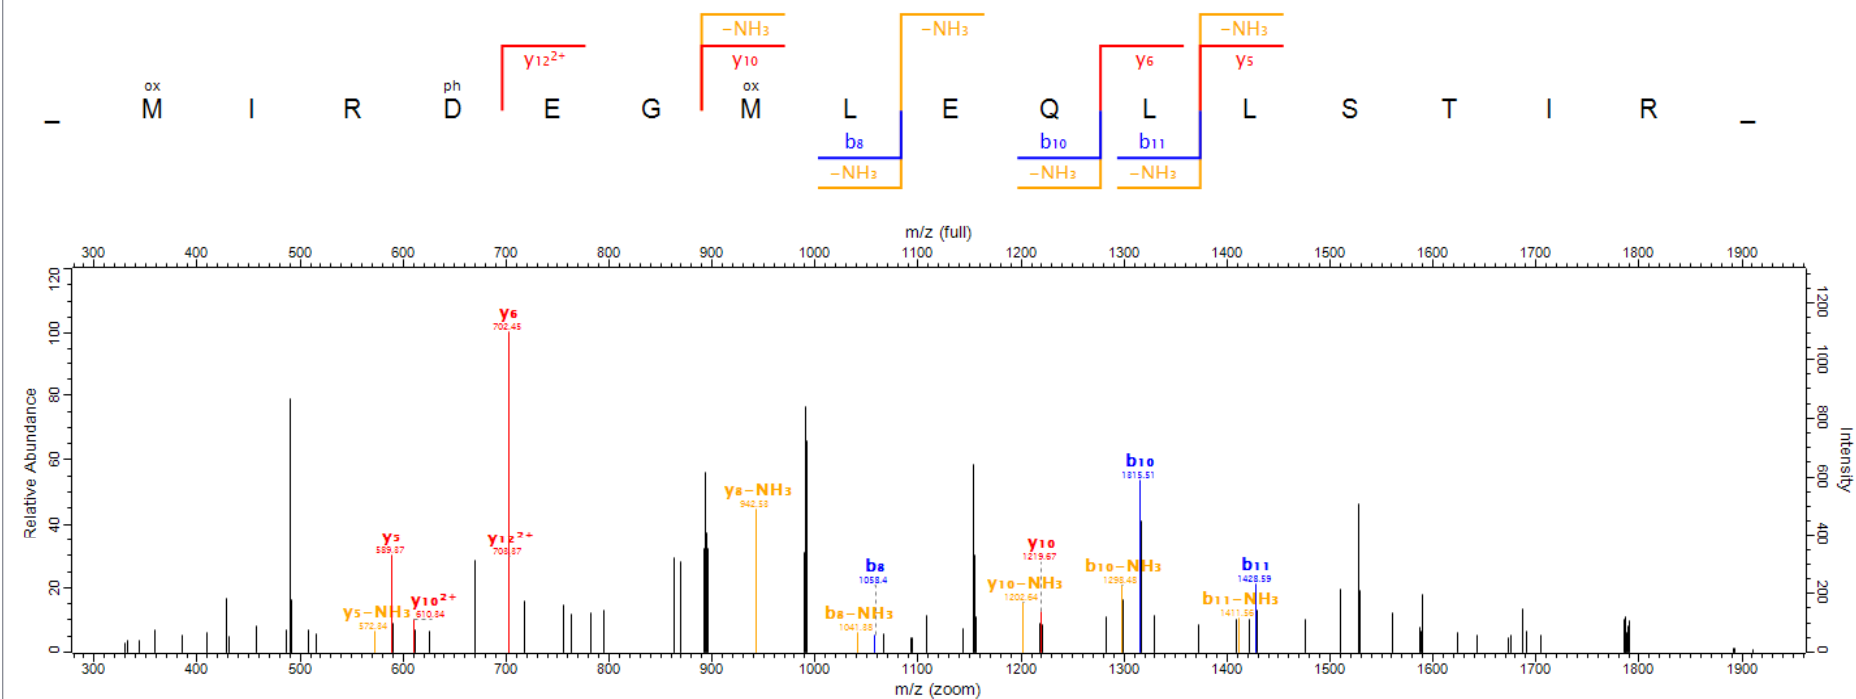



172

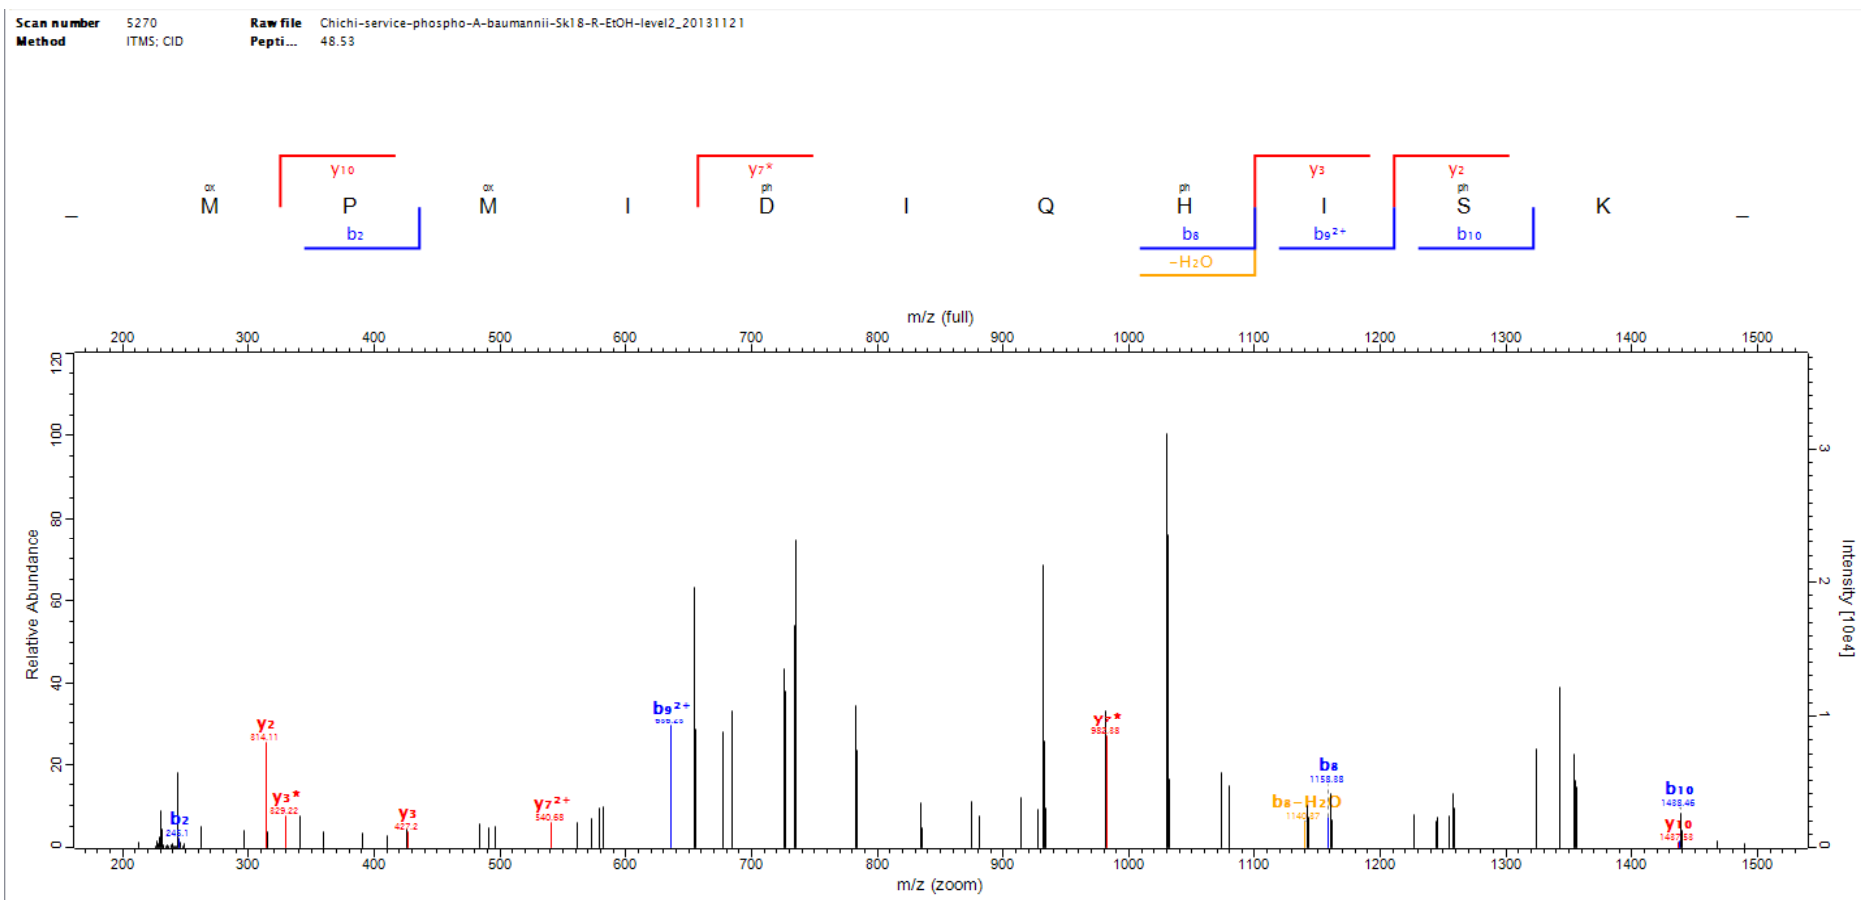

173

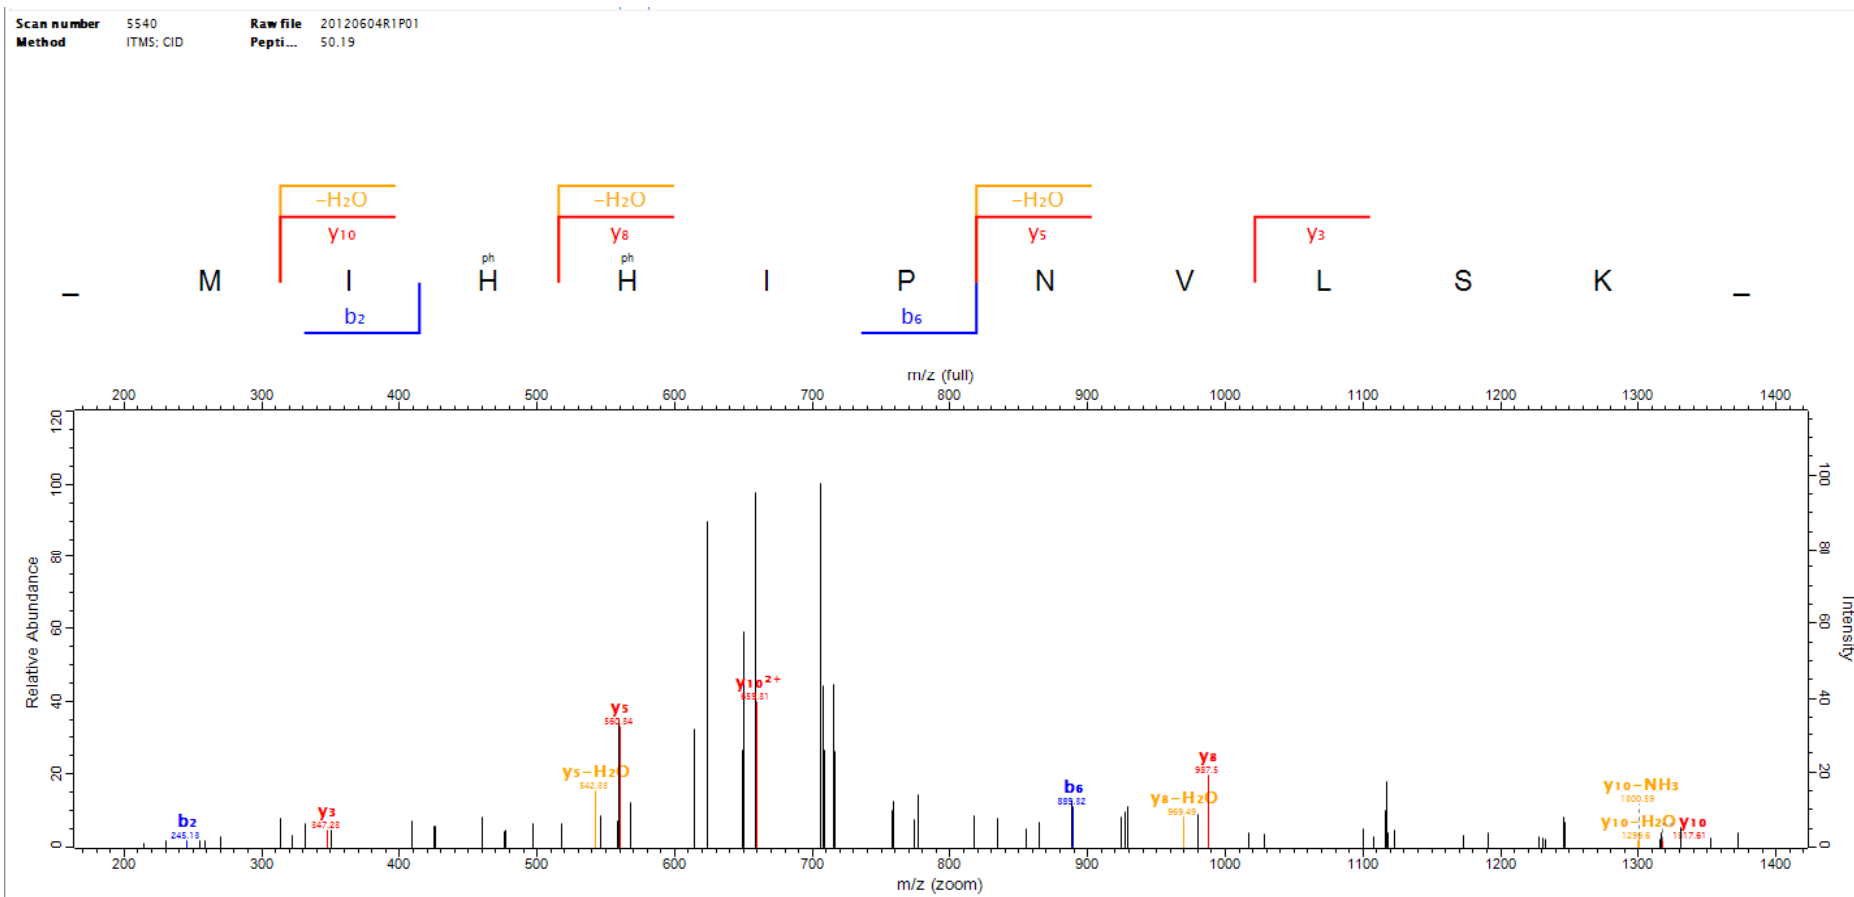

174

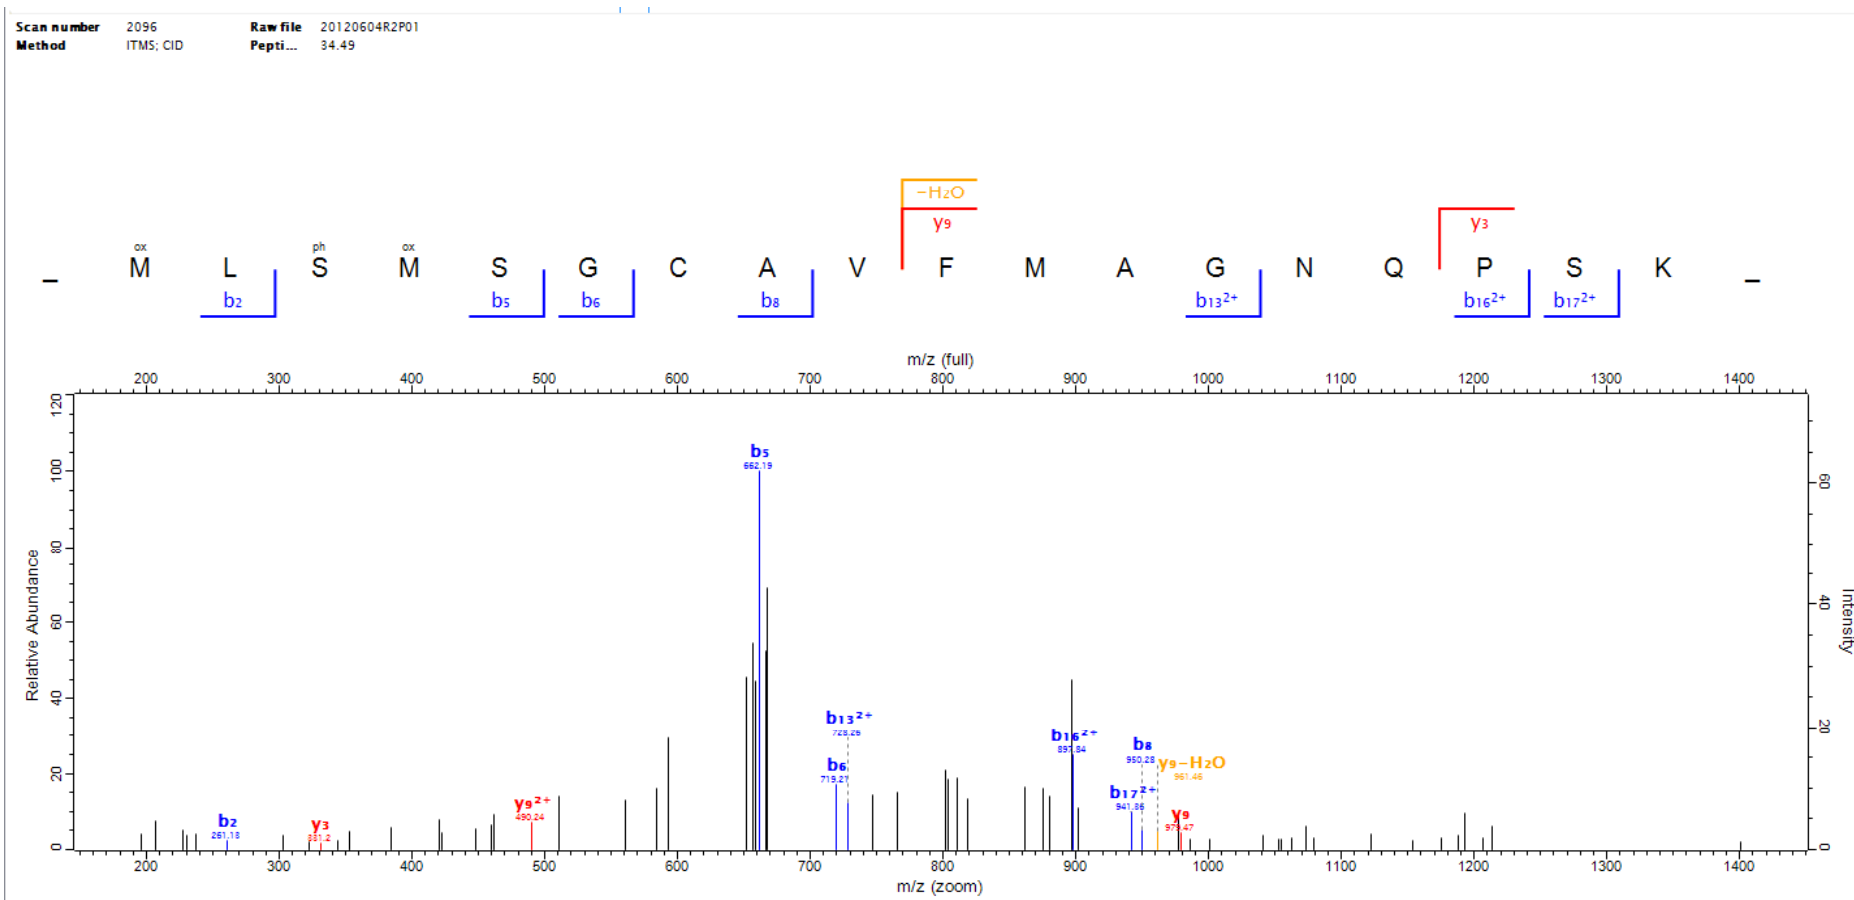

175

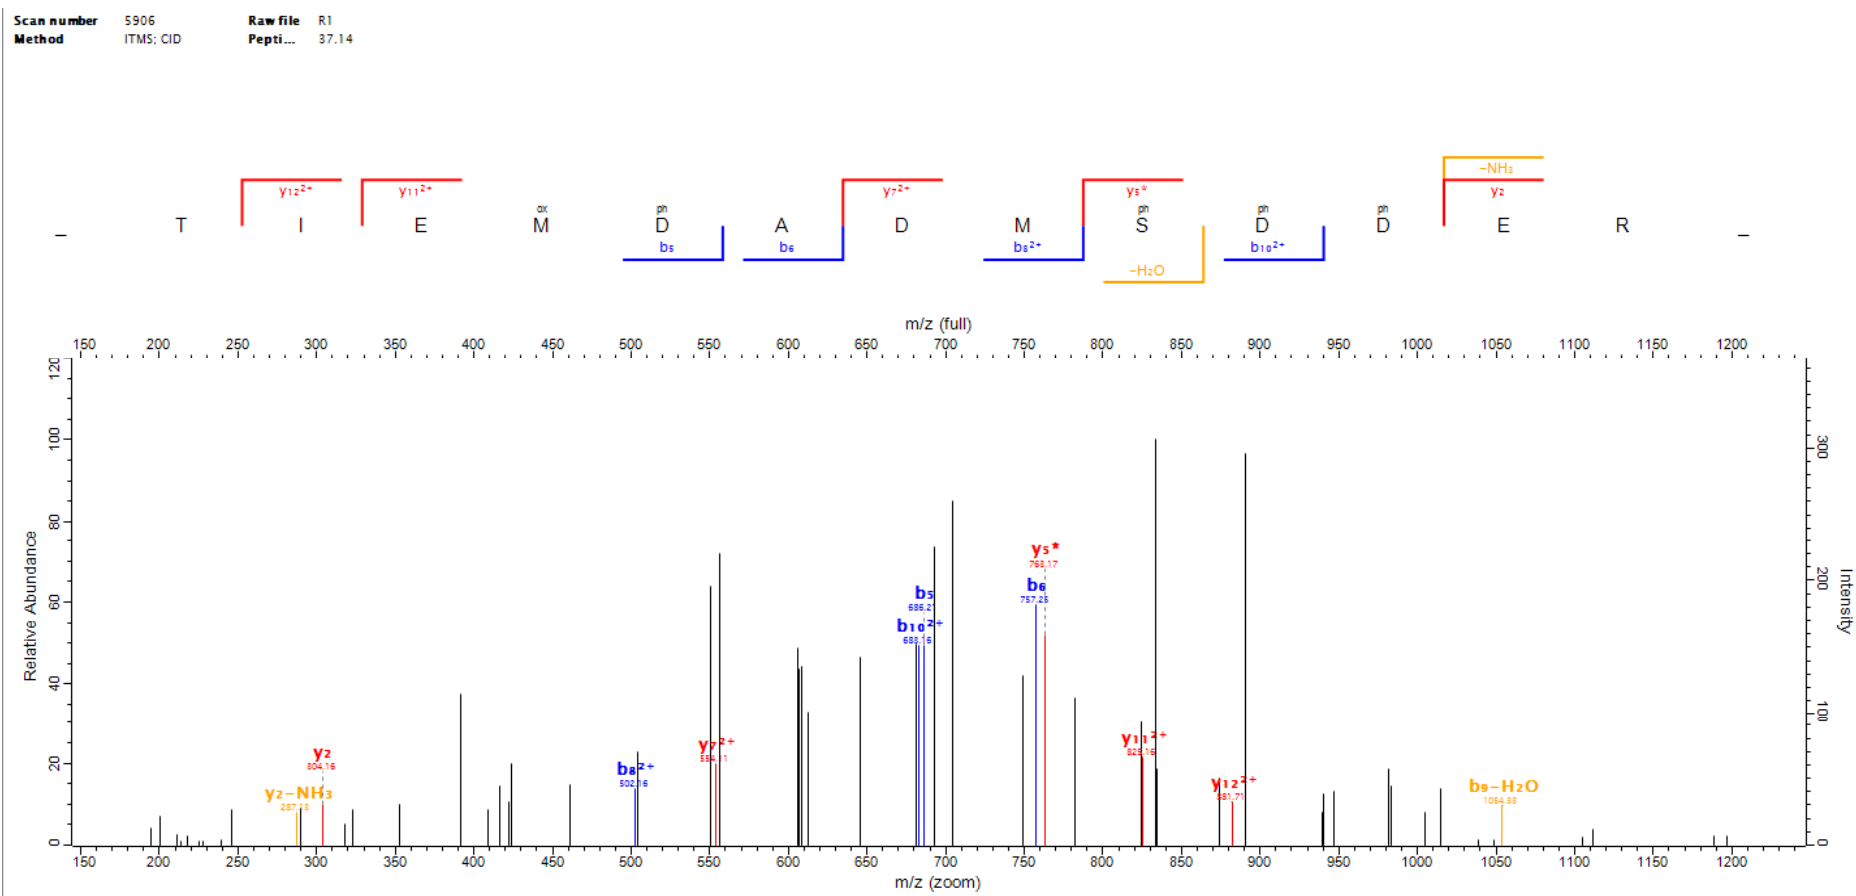

176

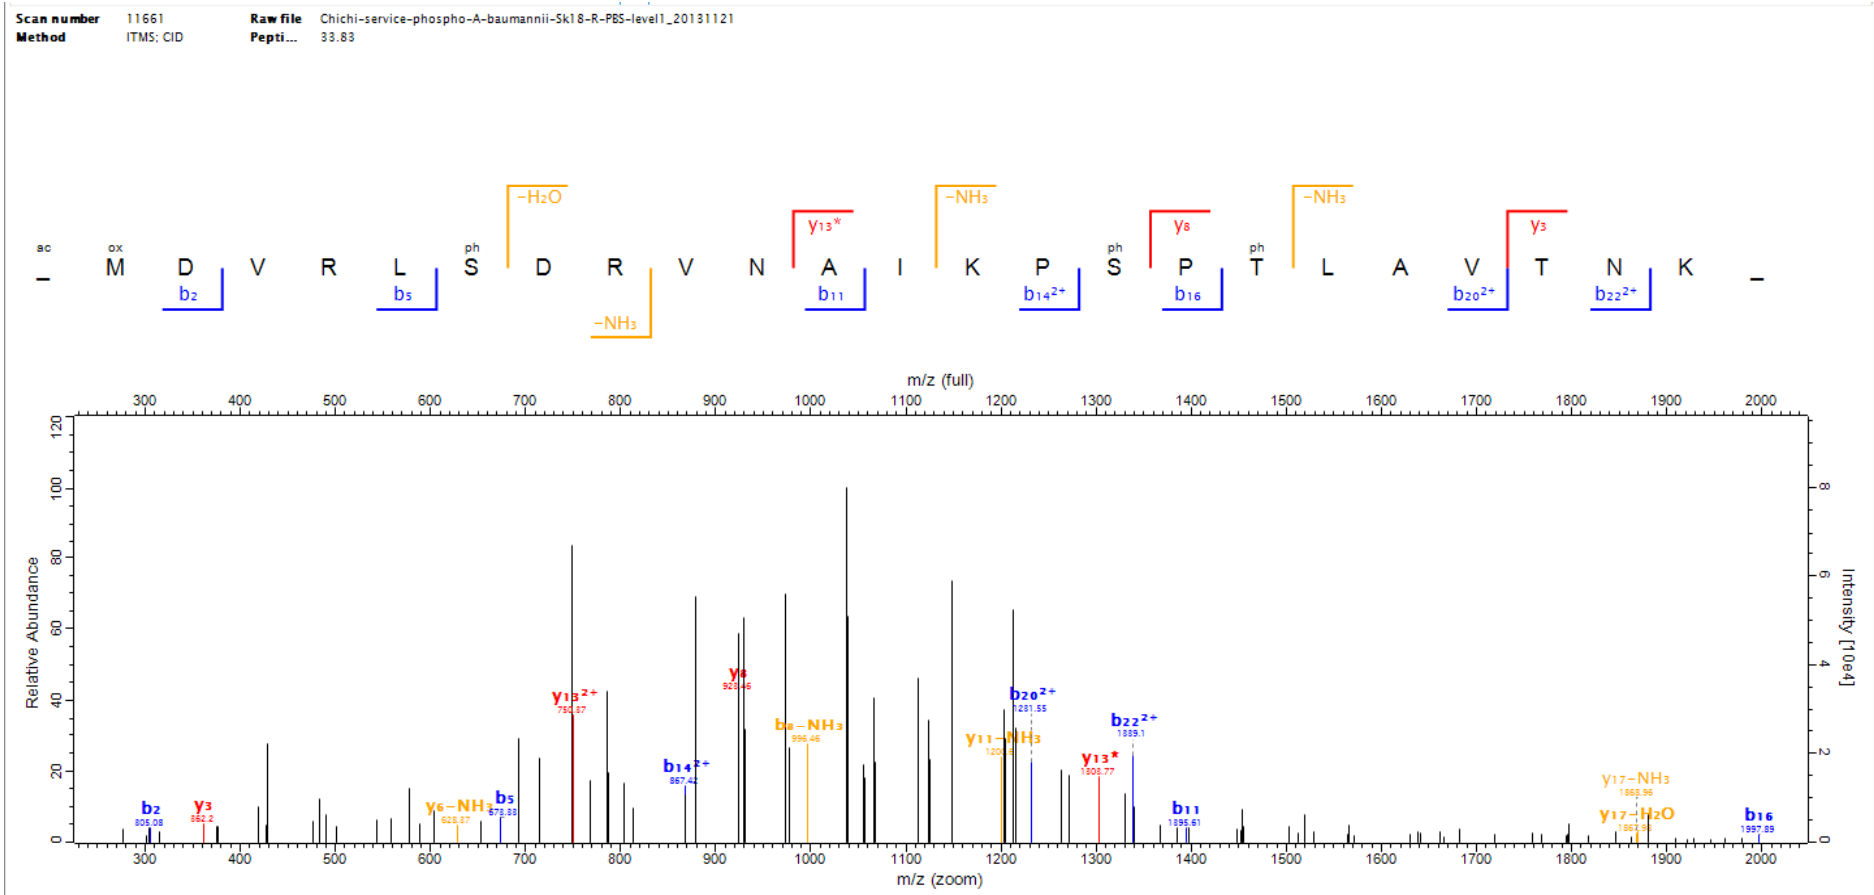

177

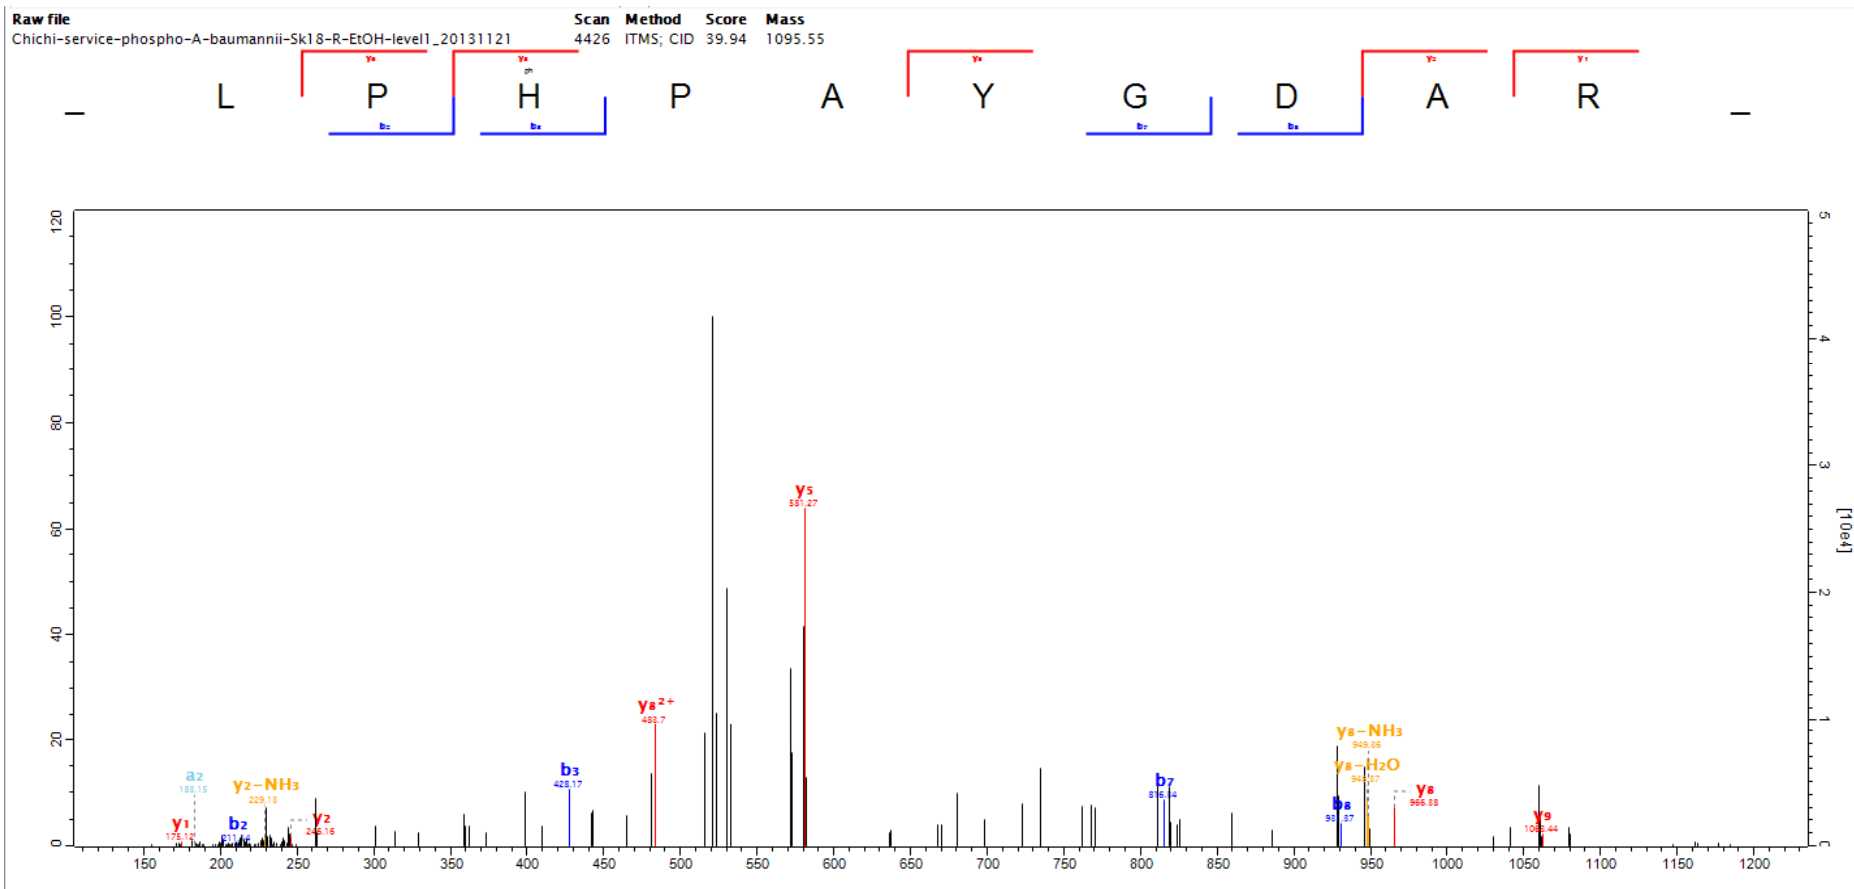

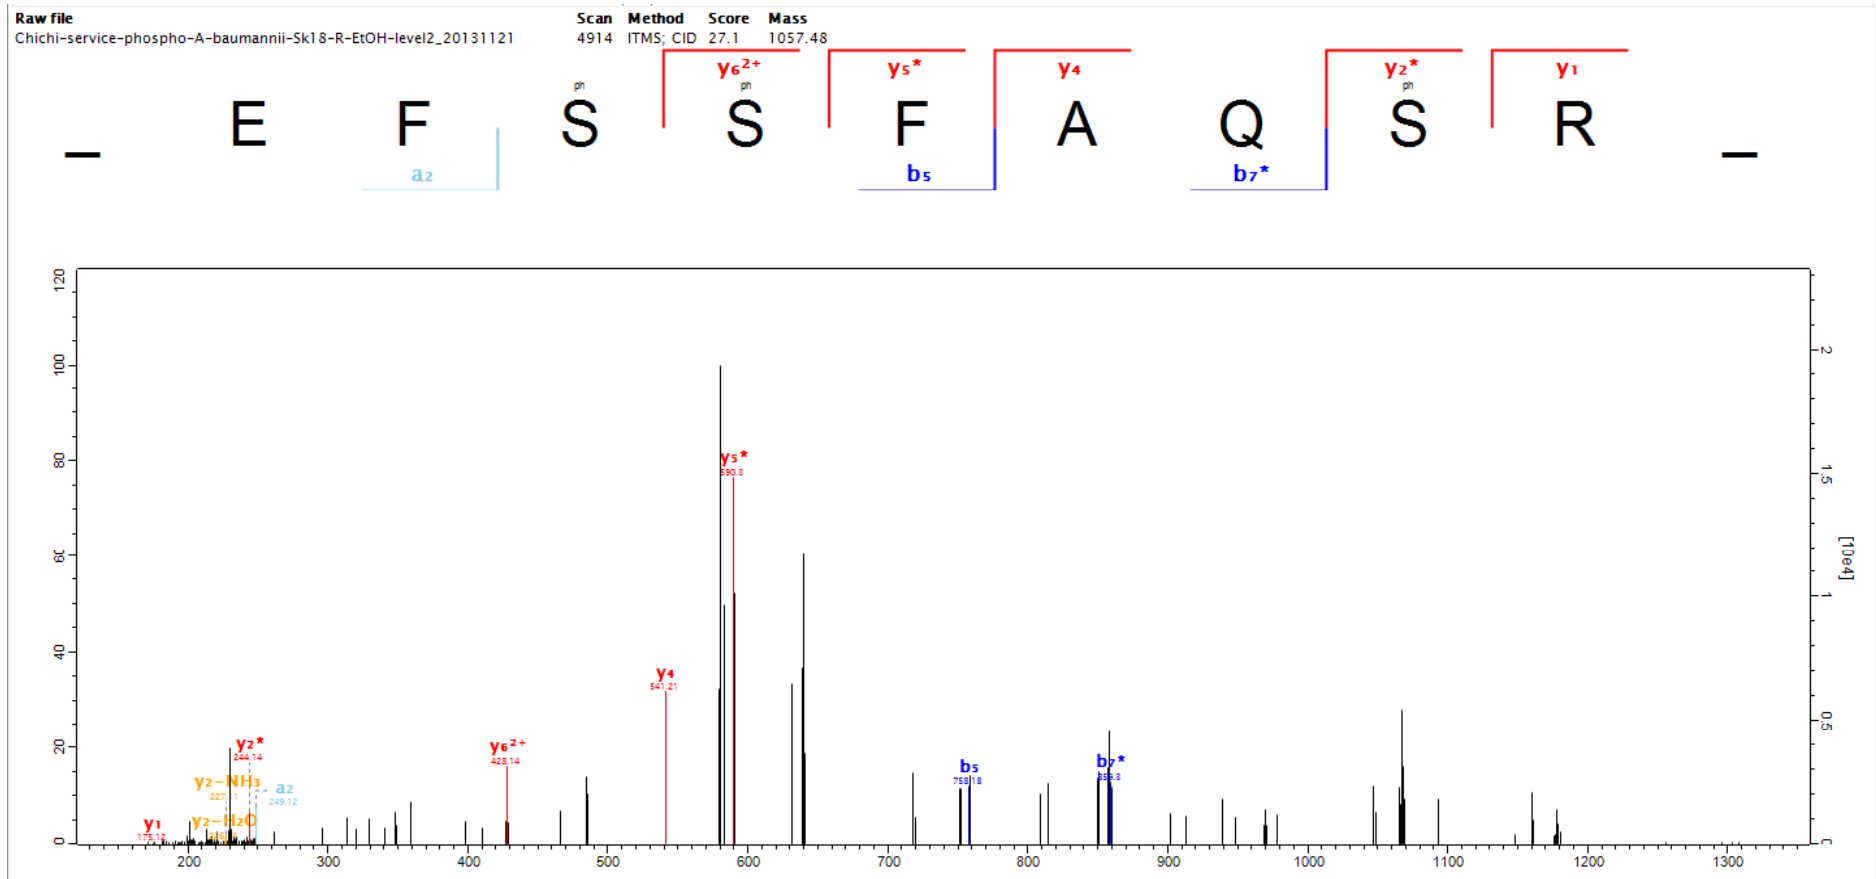

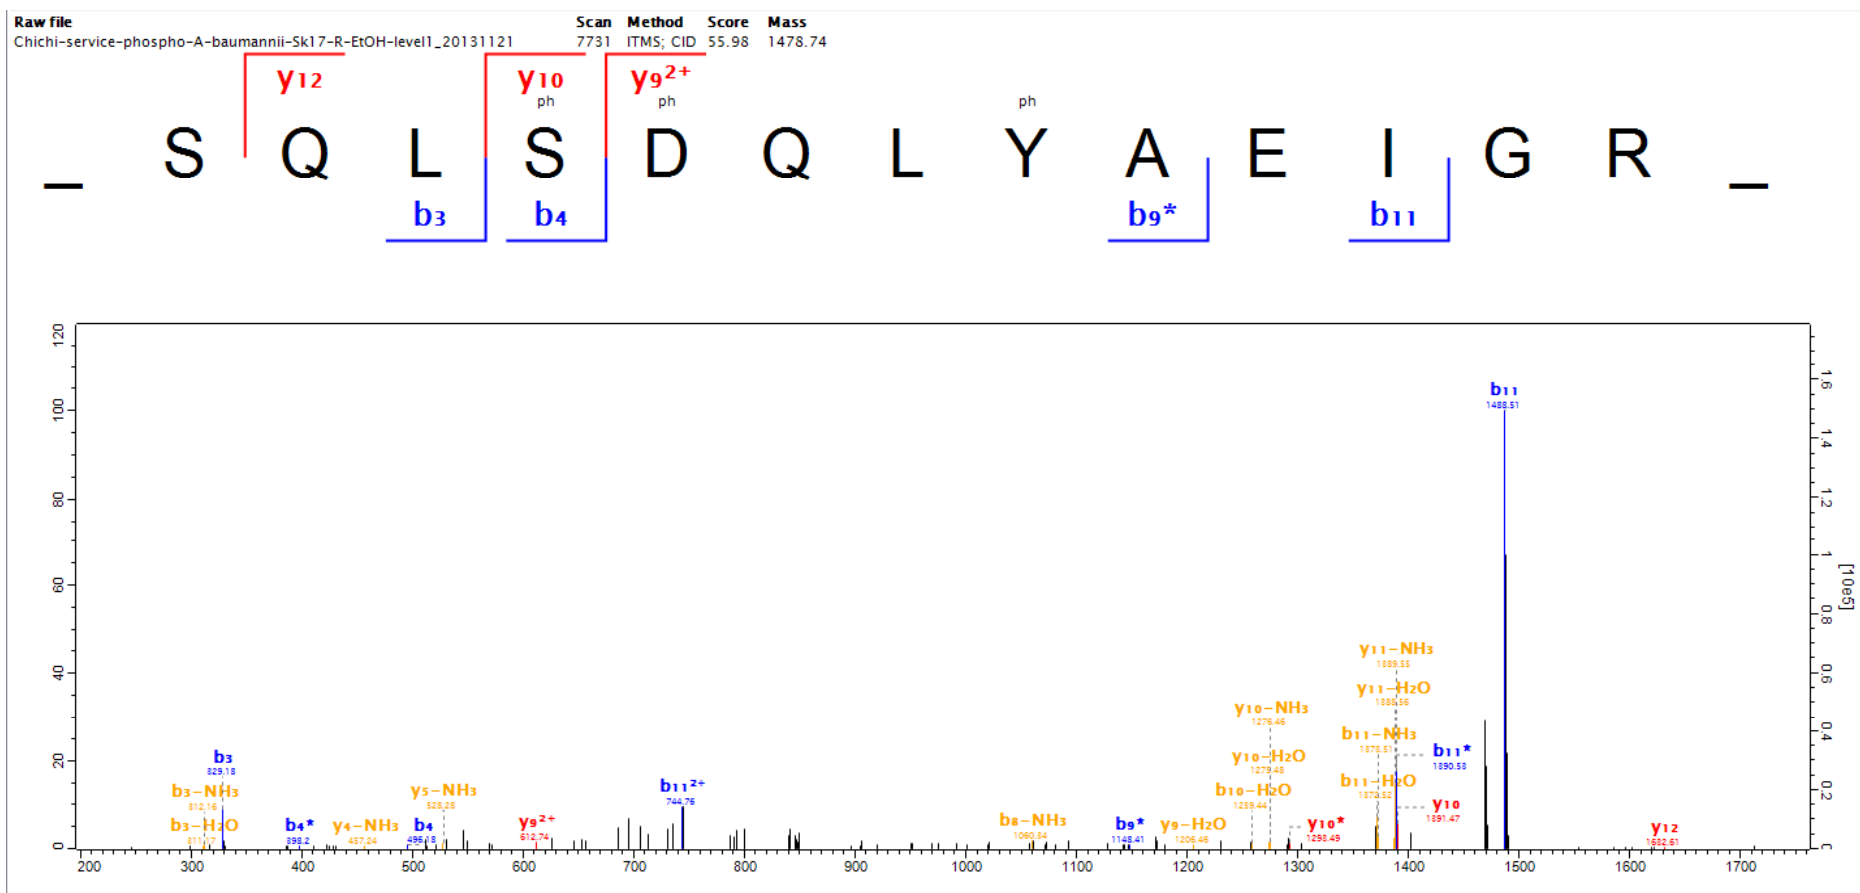



180

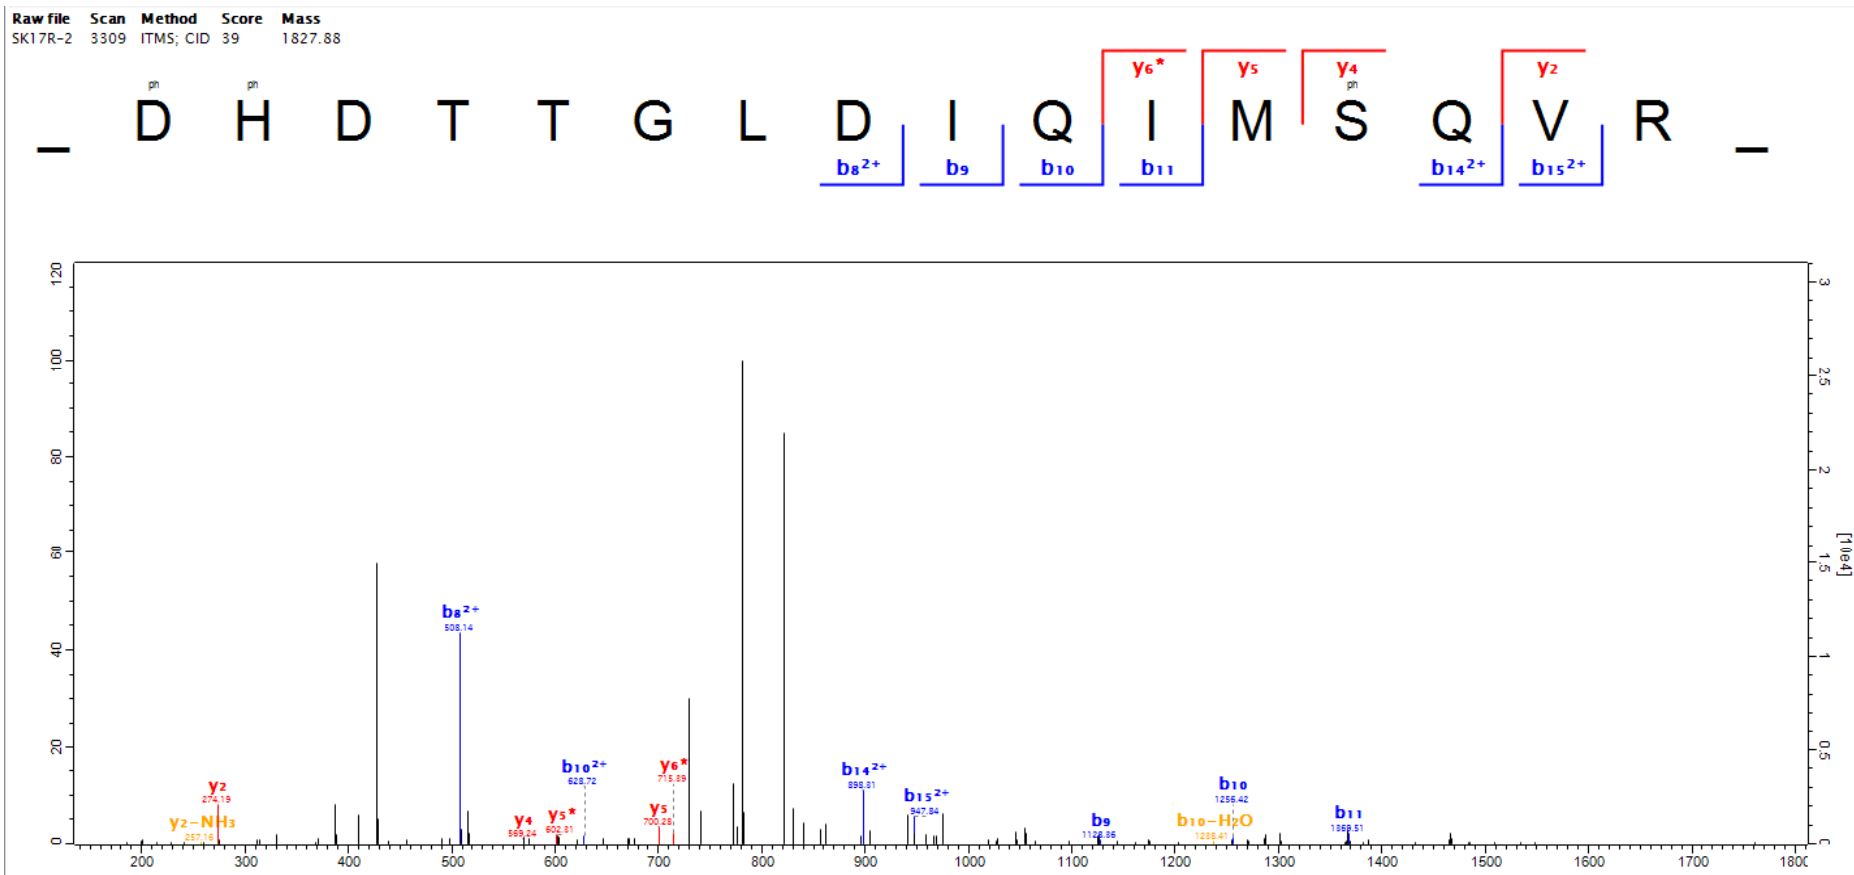

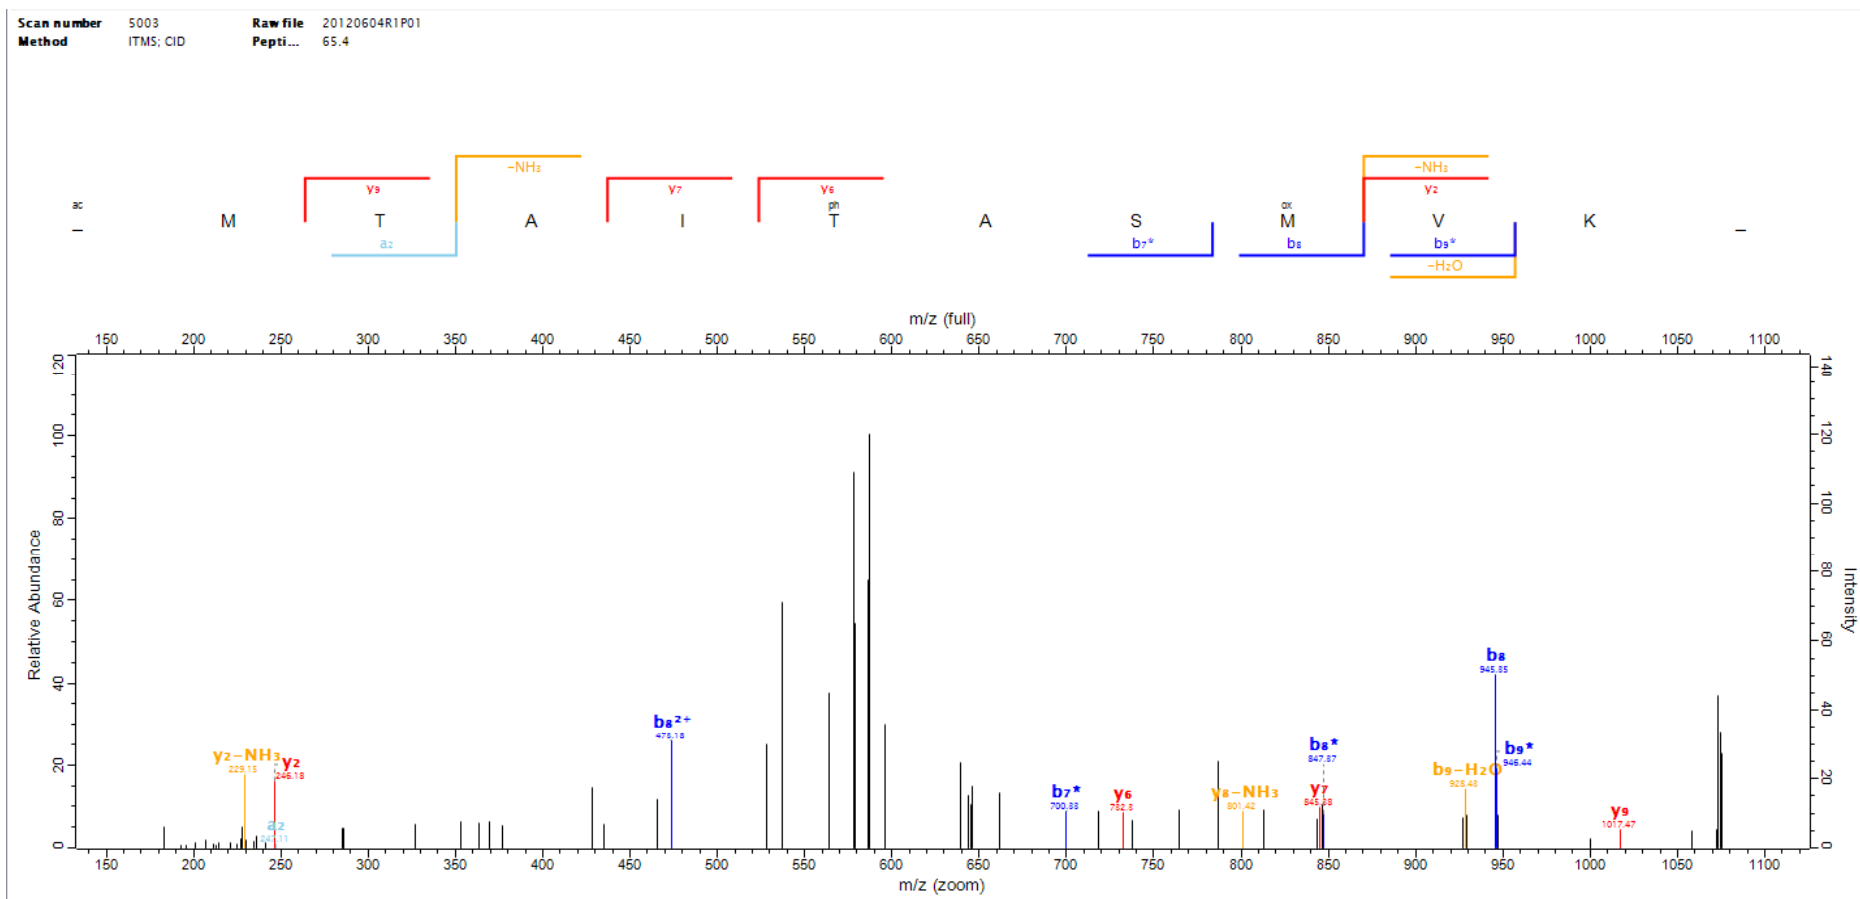

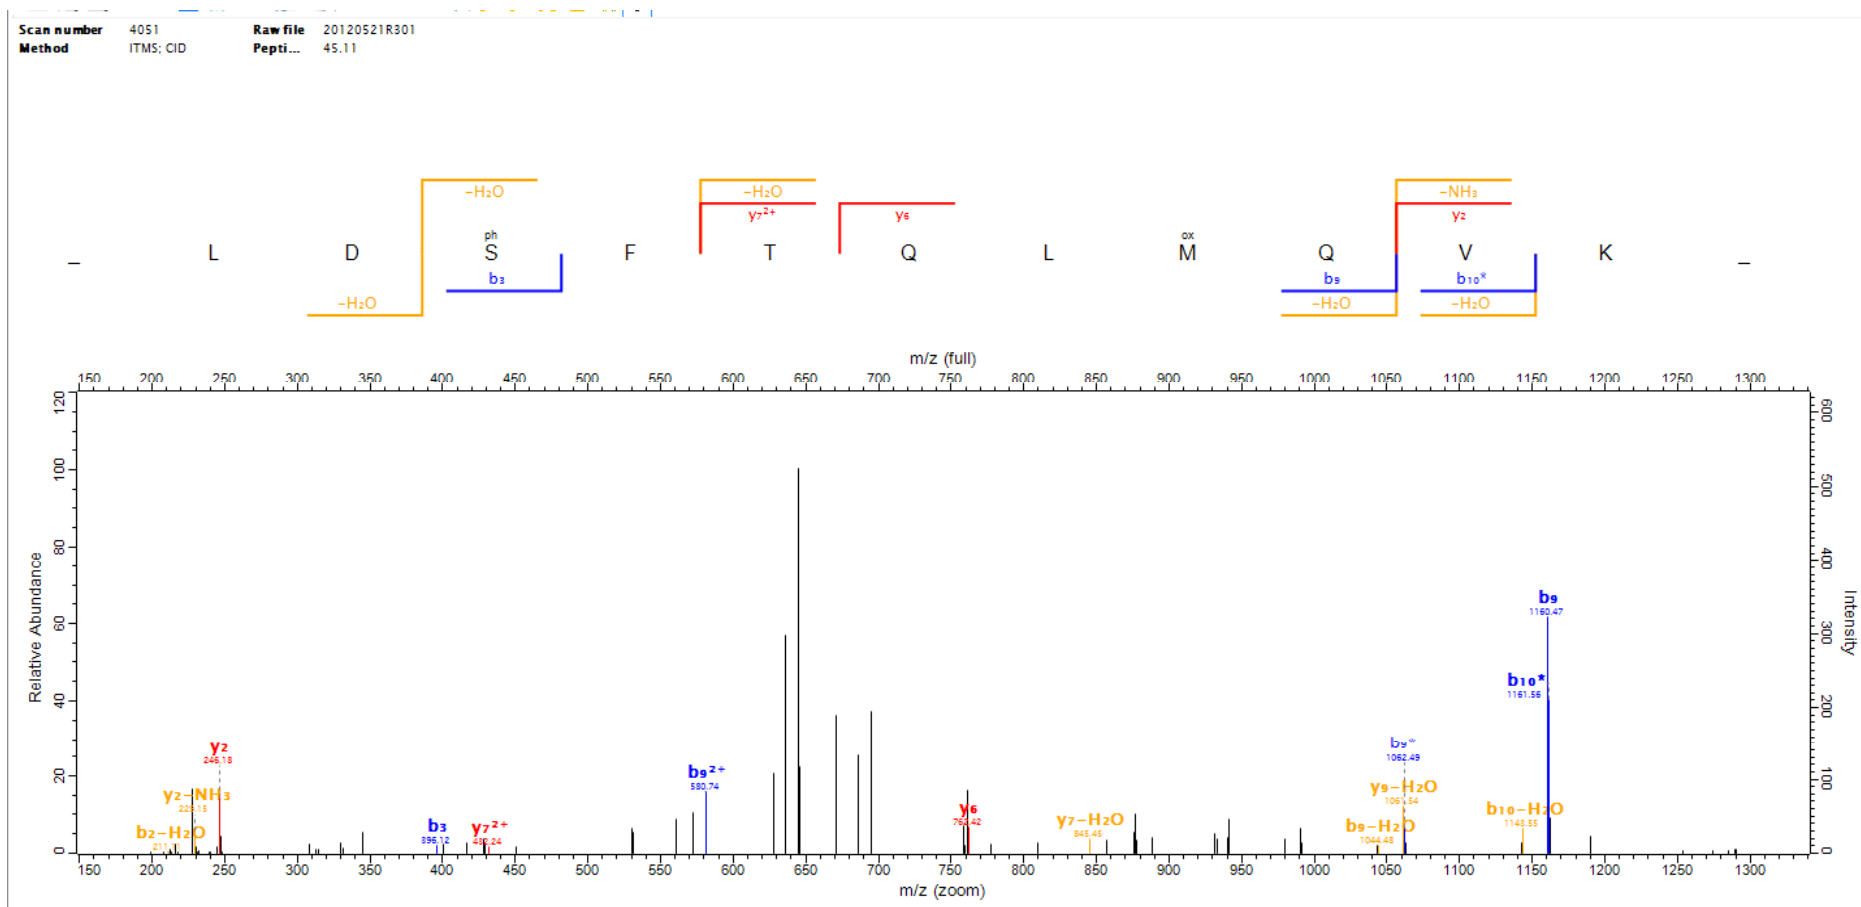

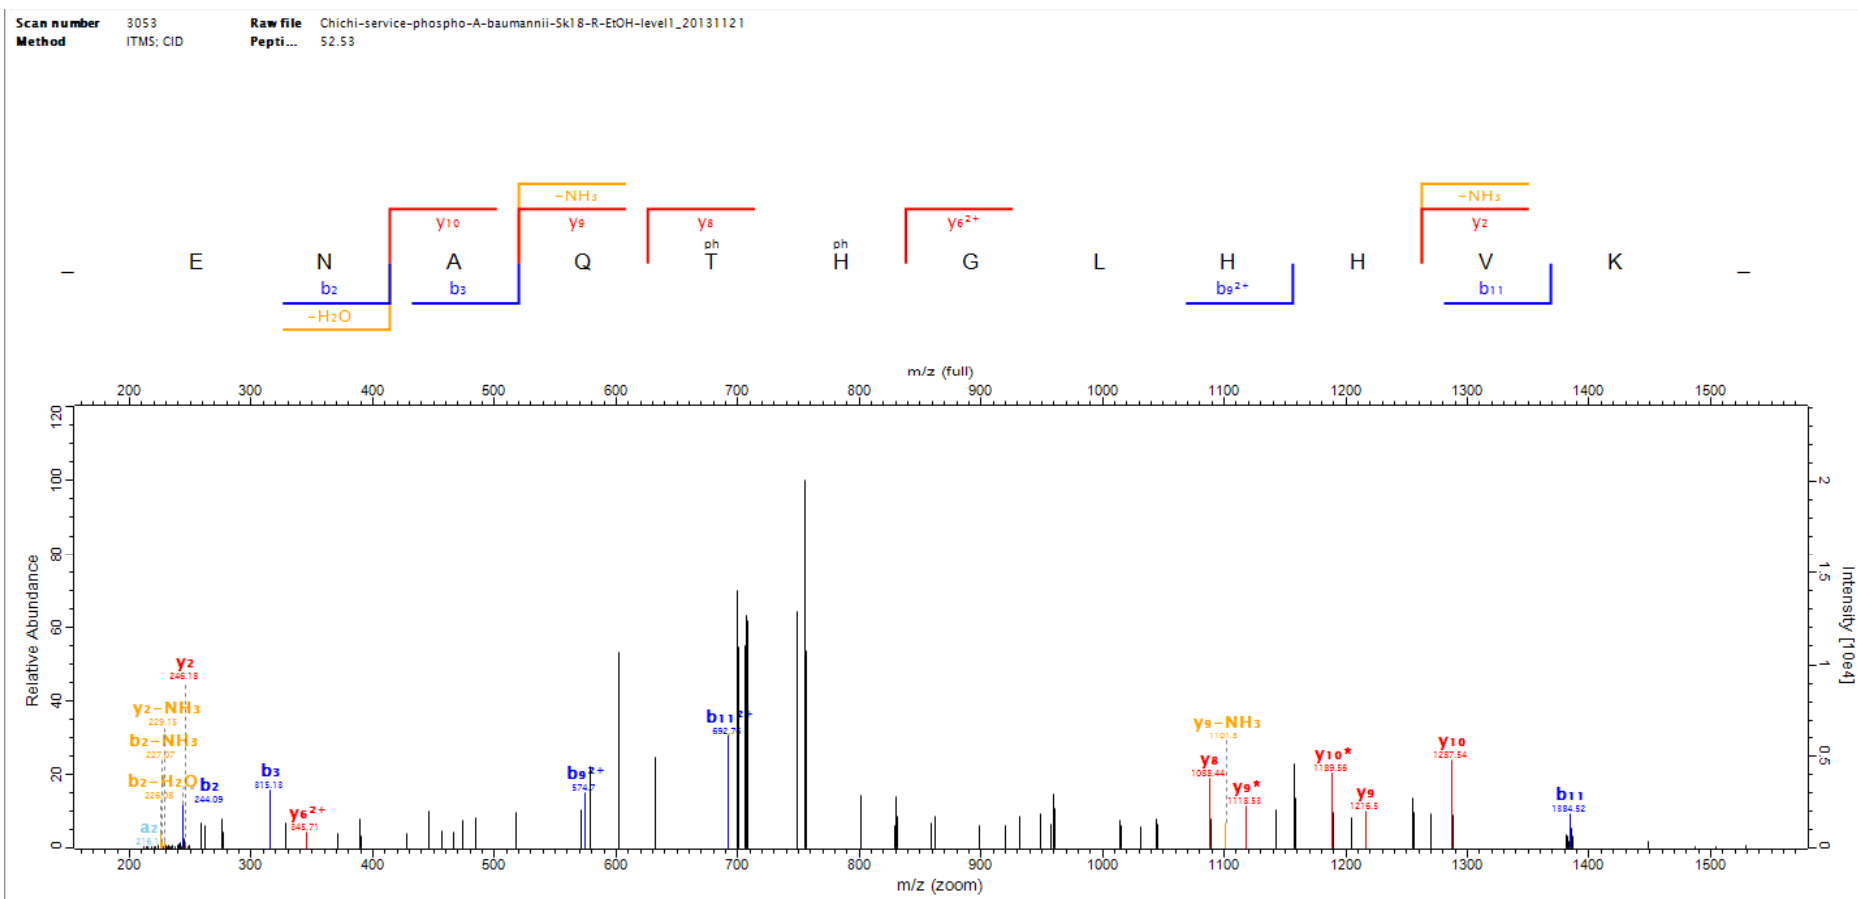

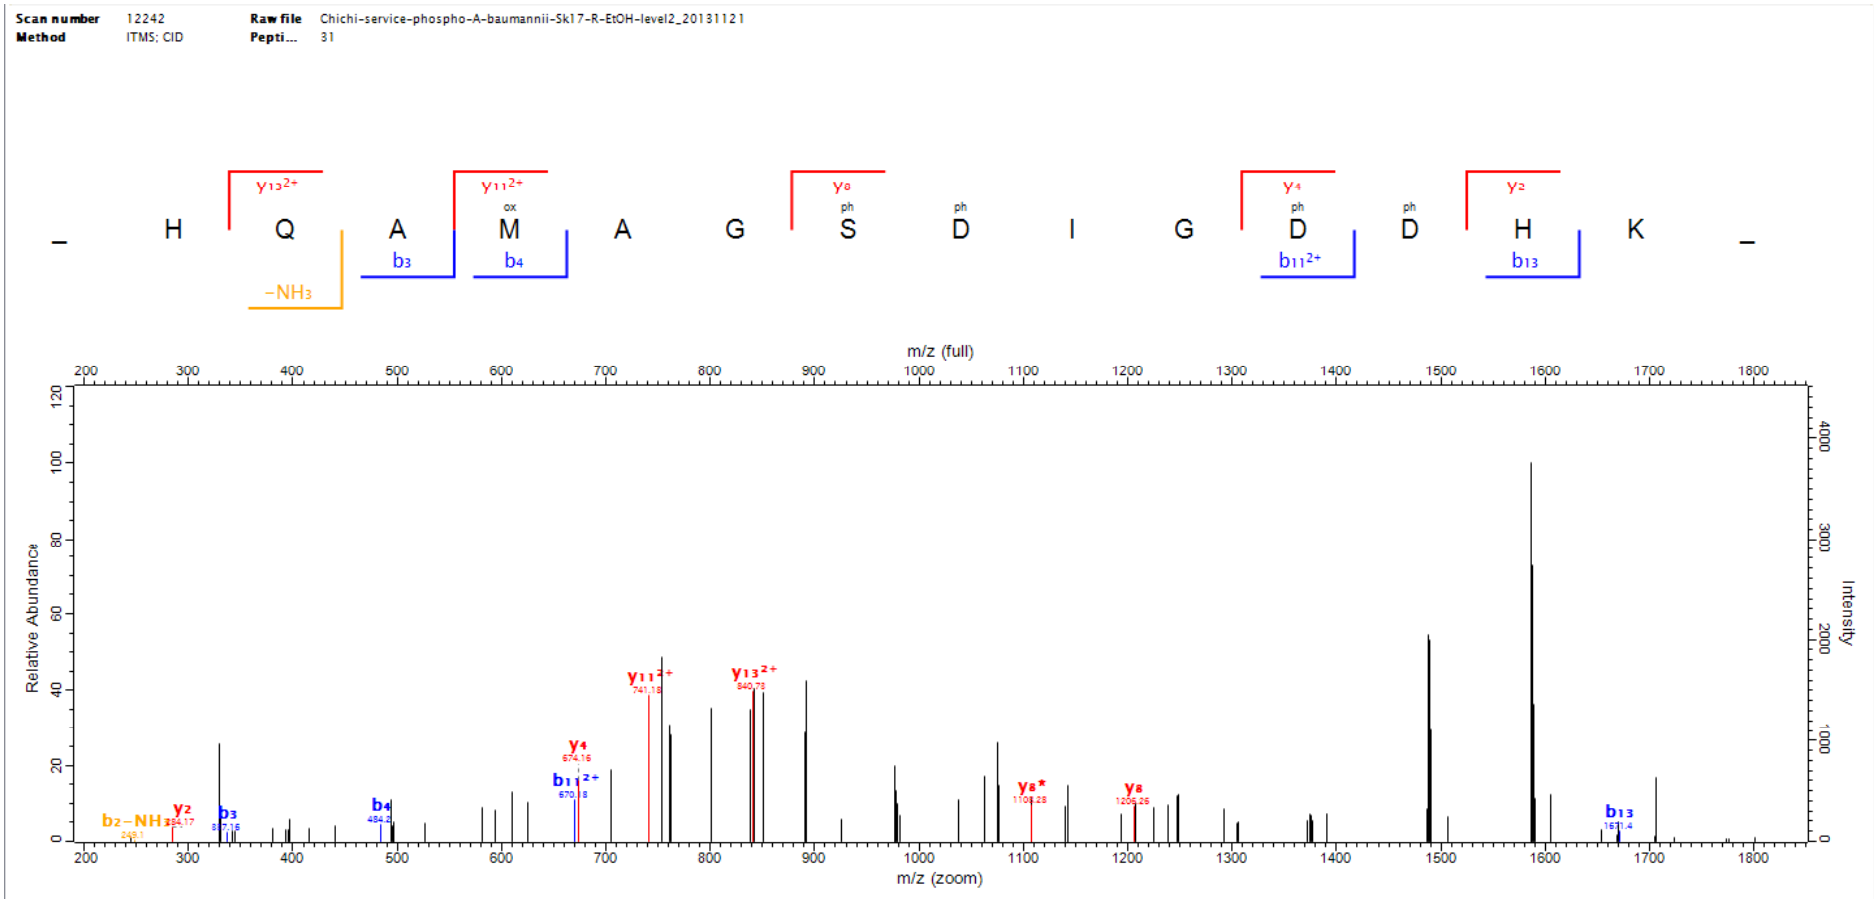

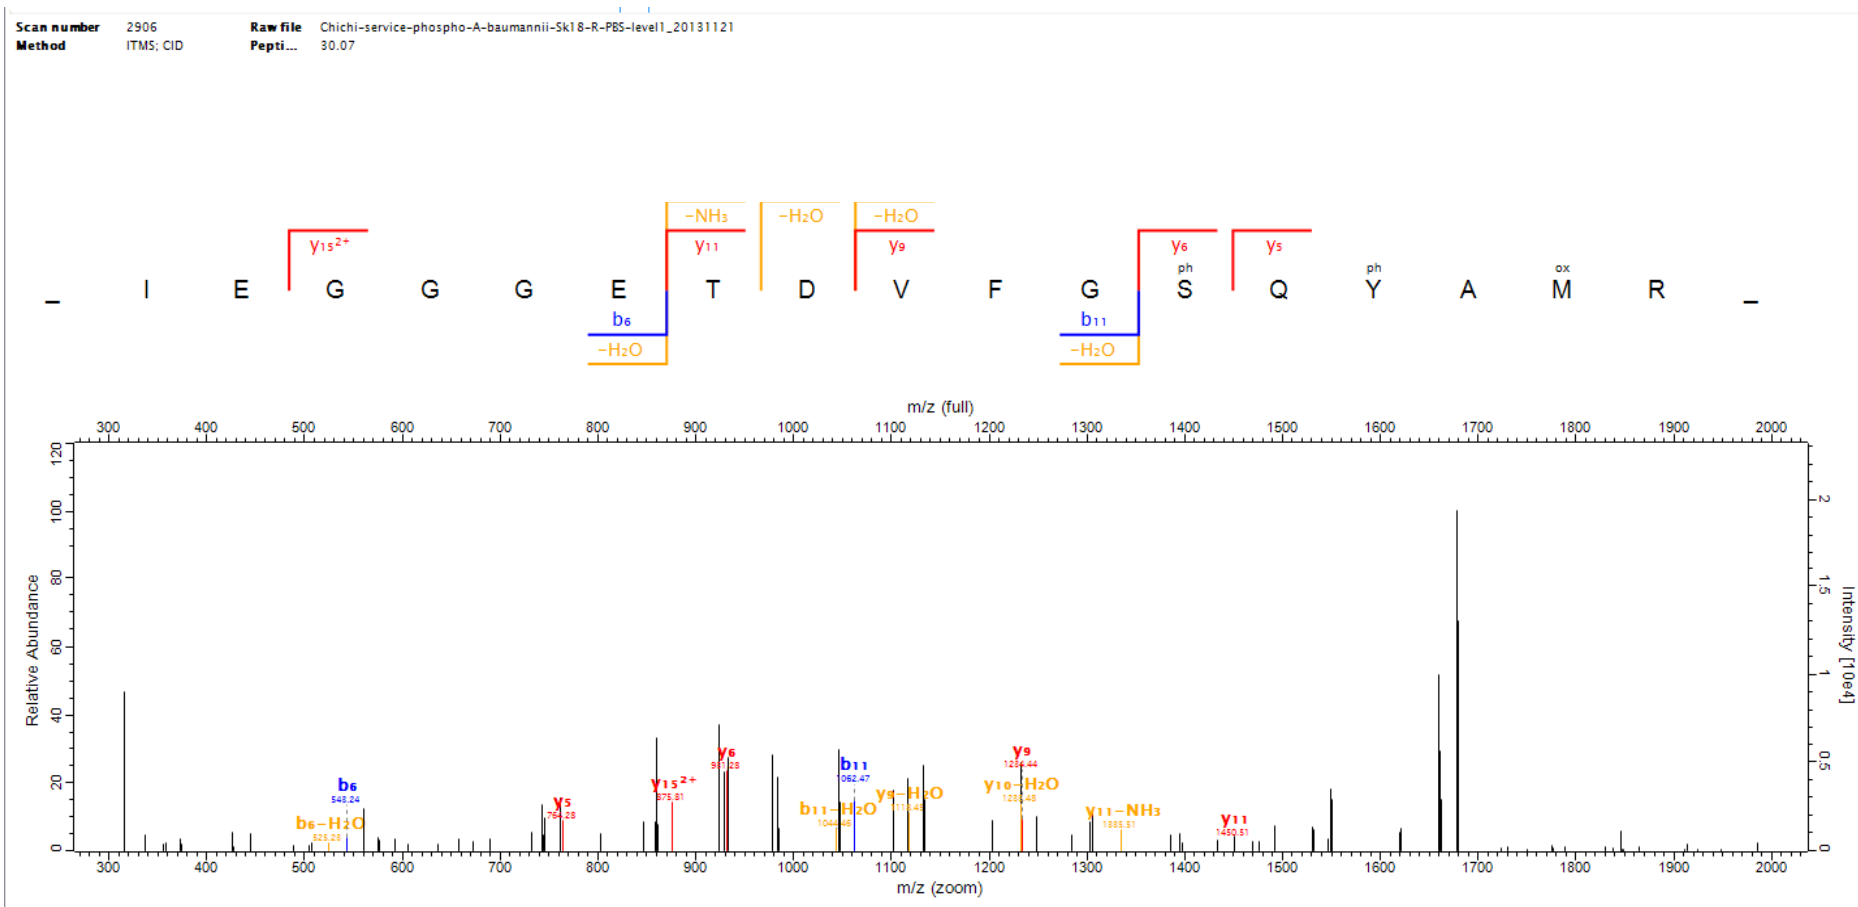

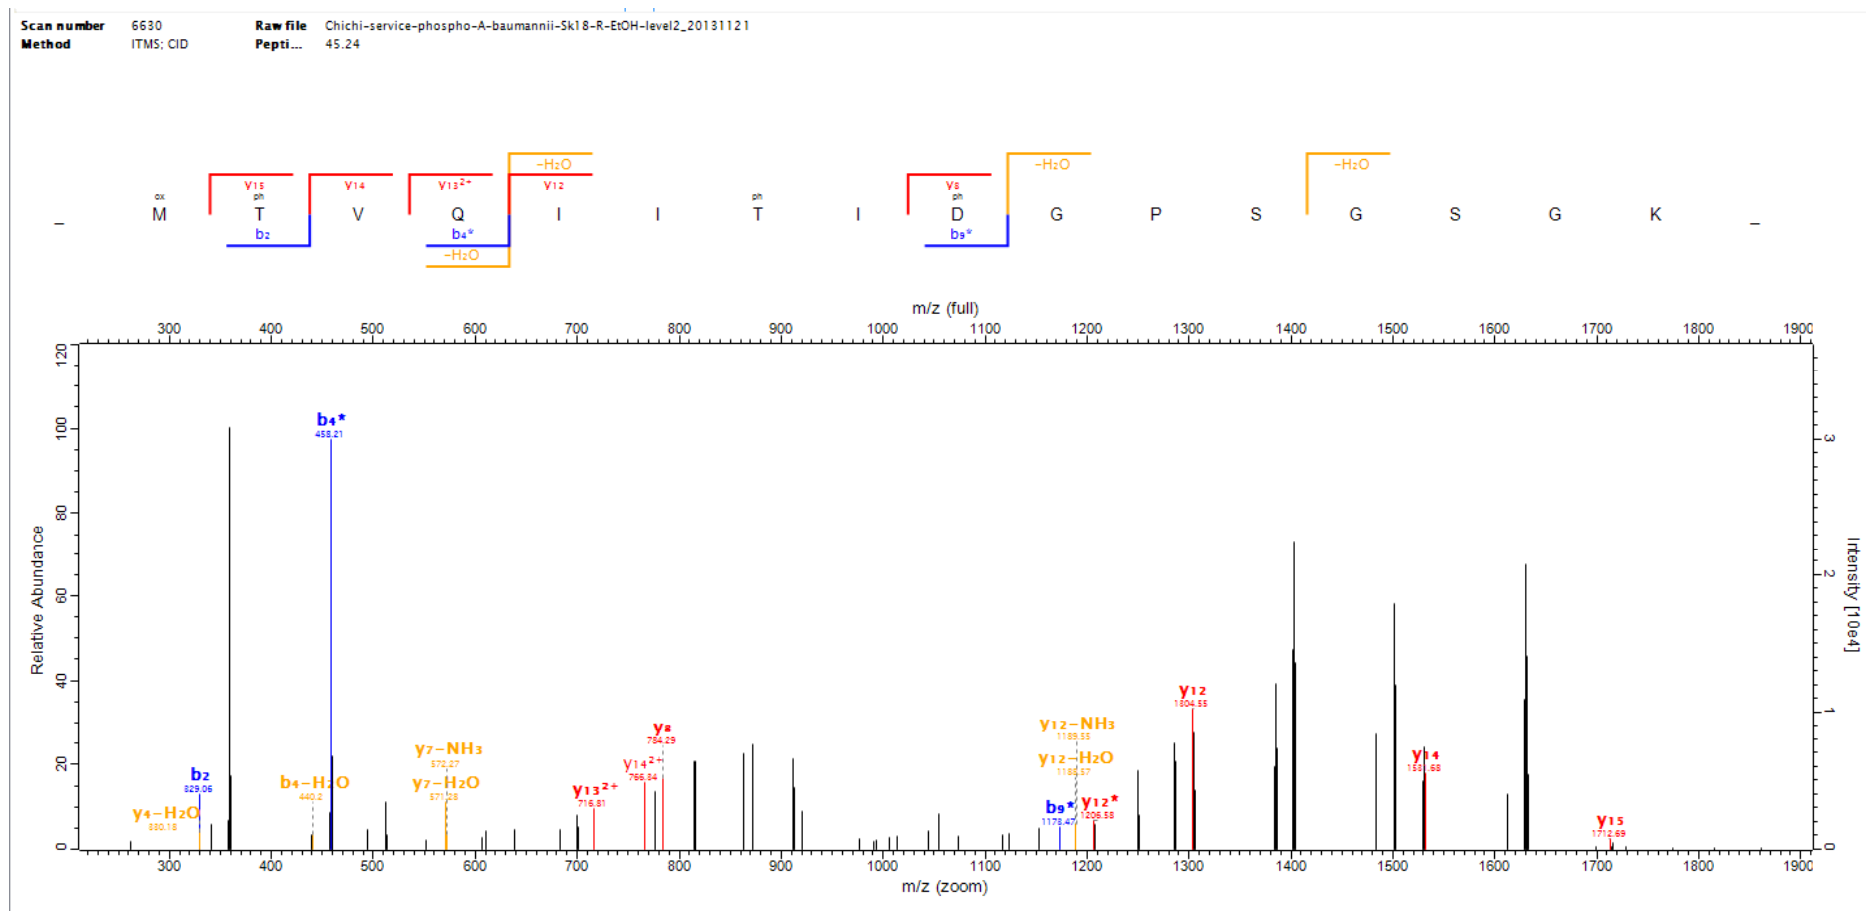

187

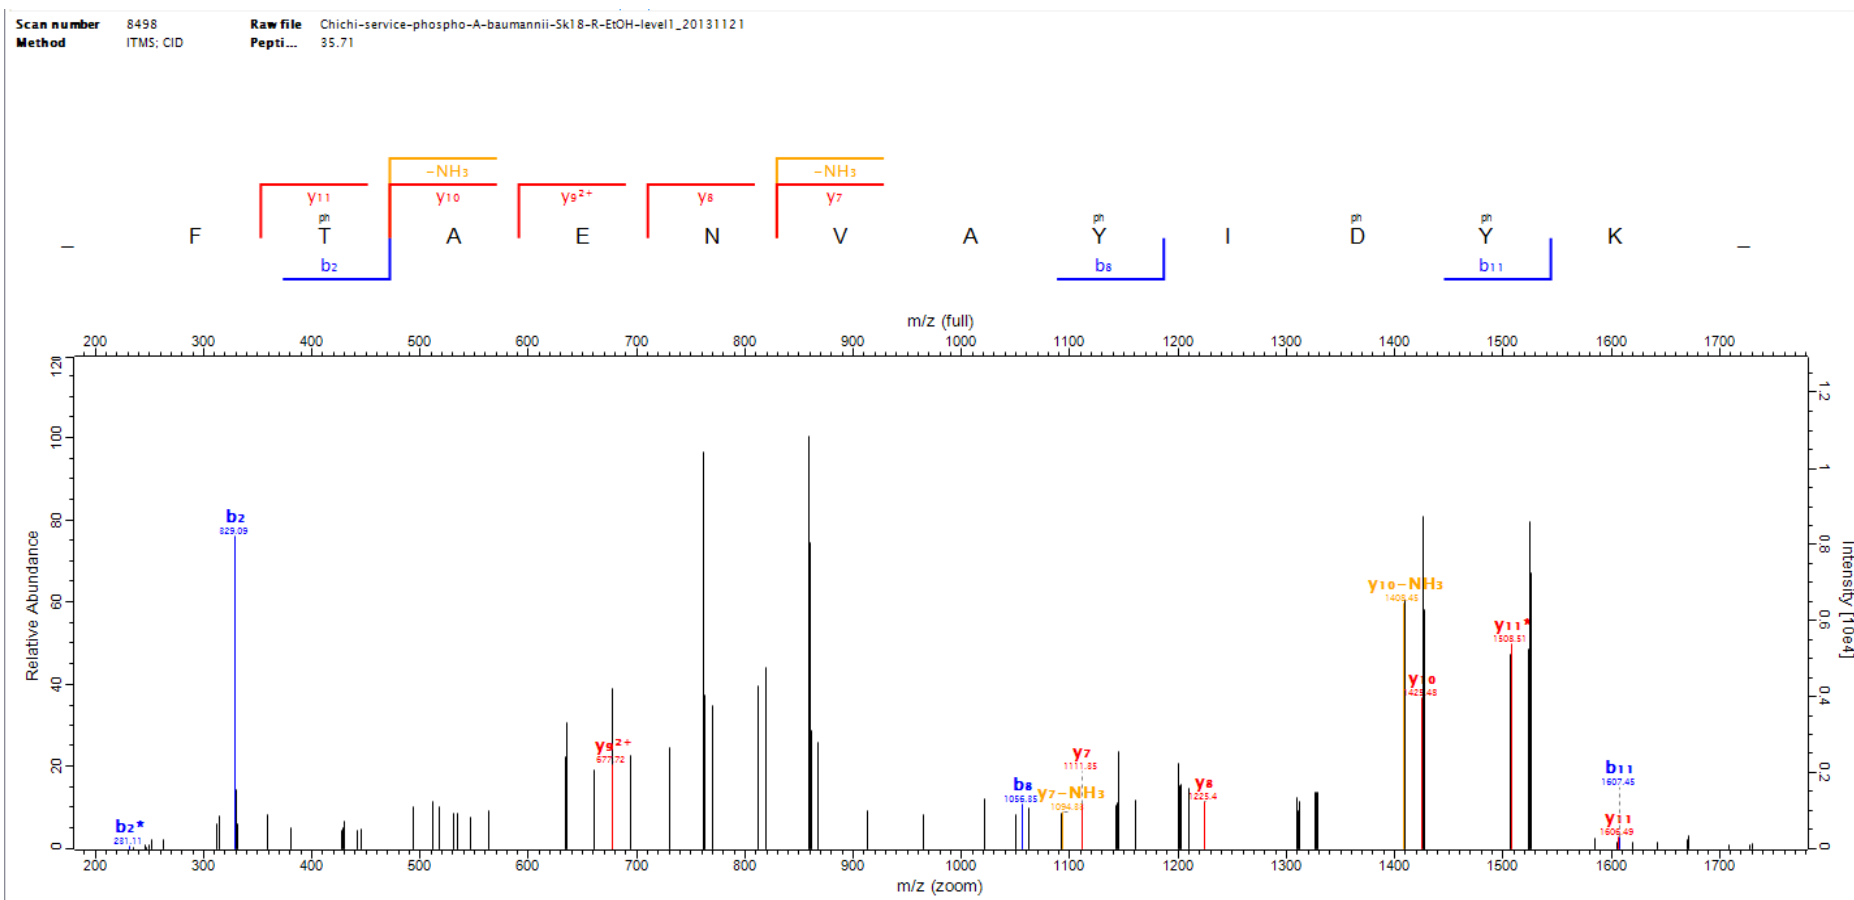



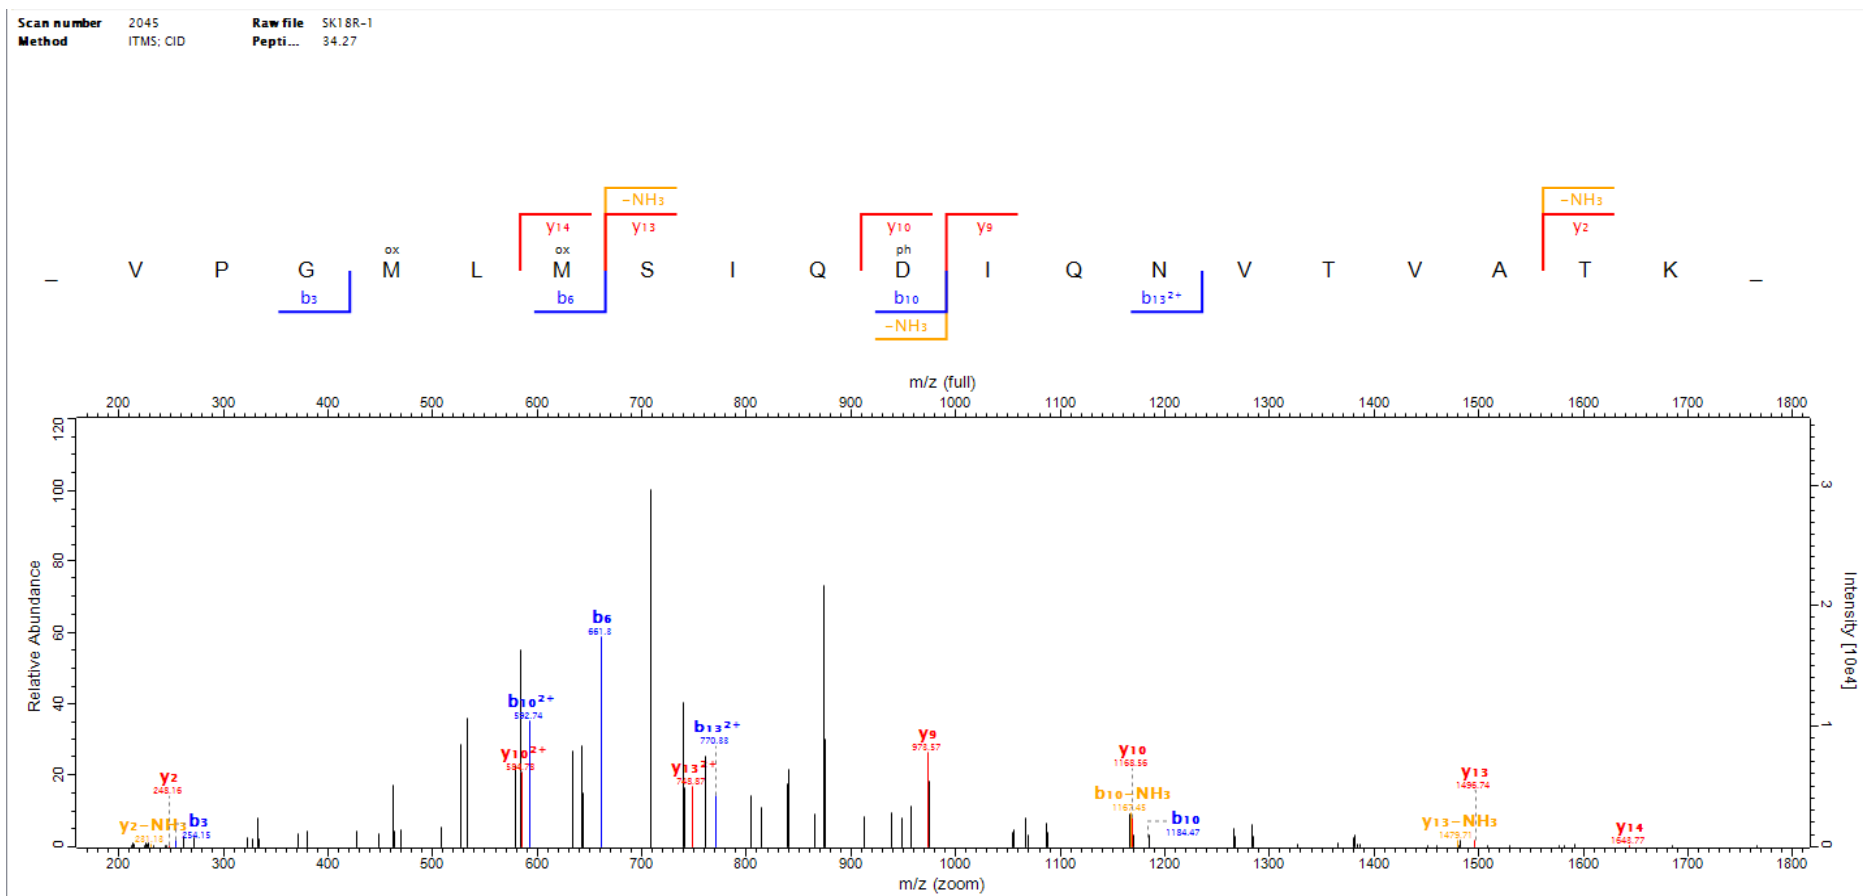

189

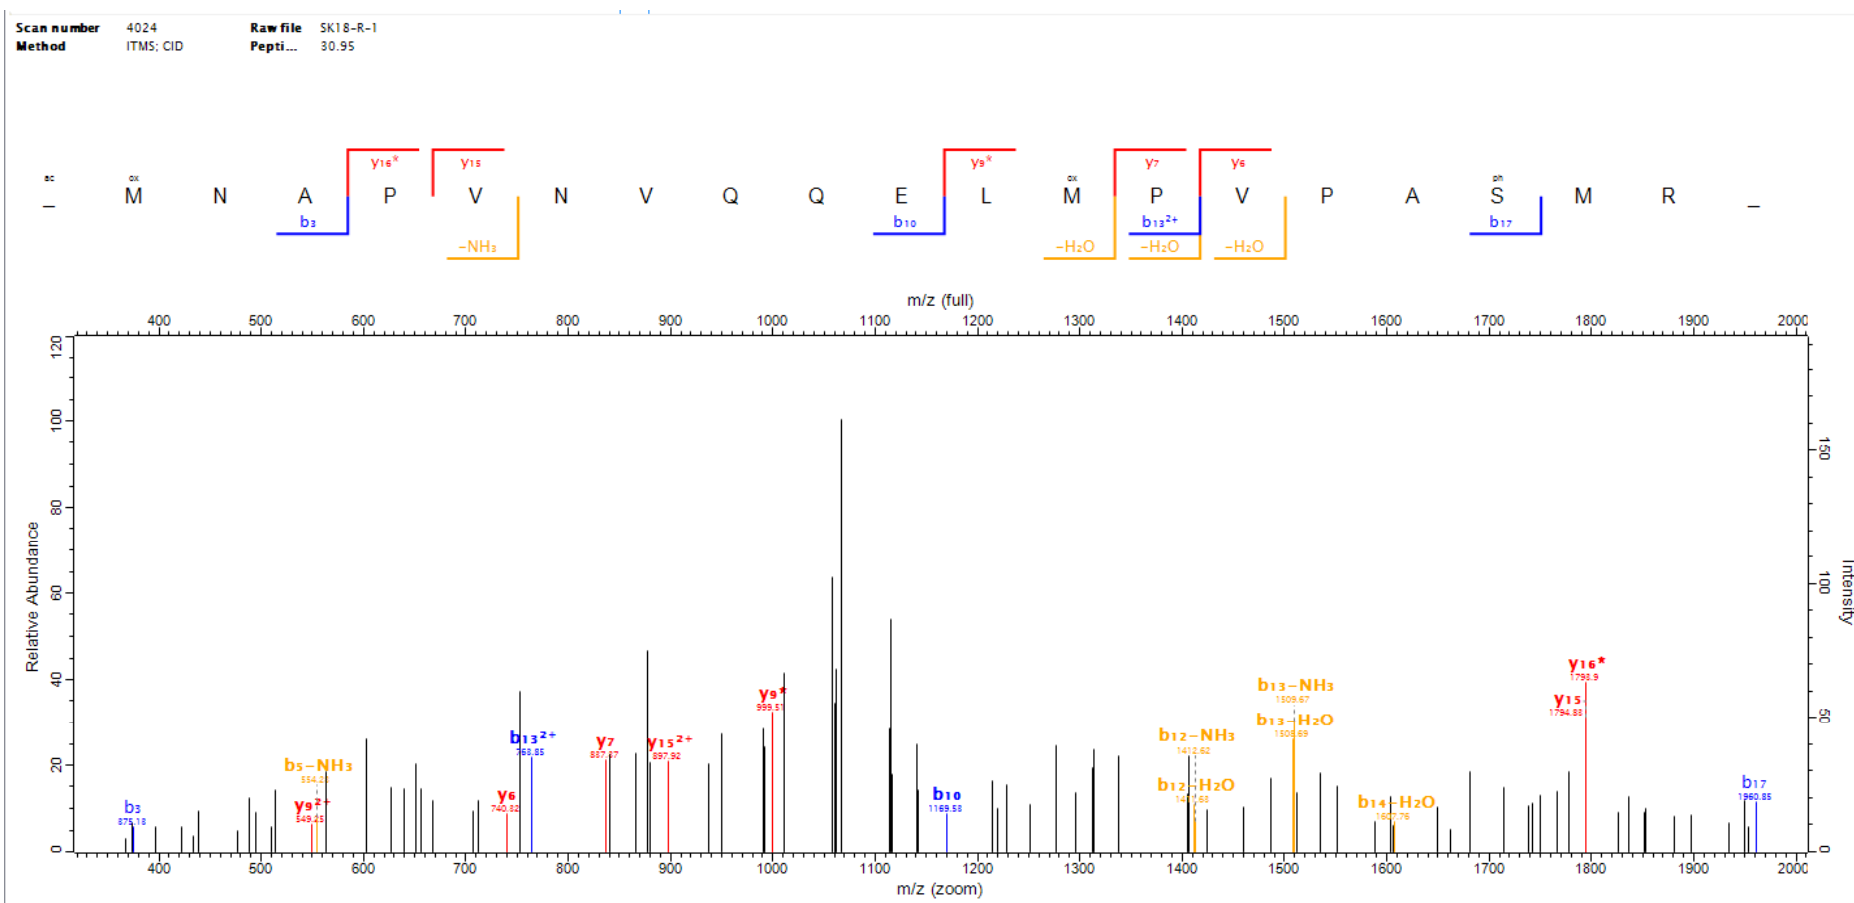

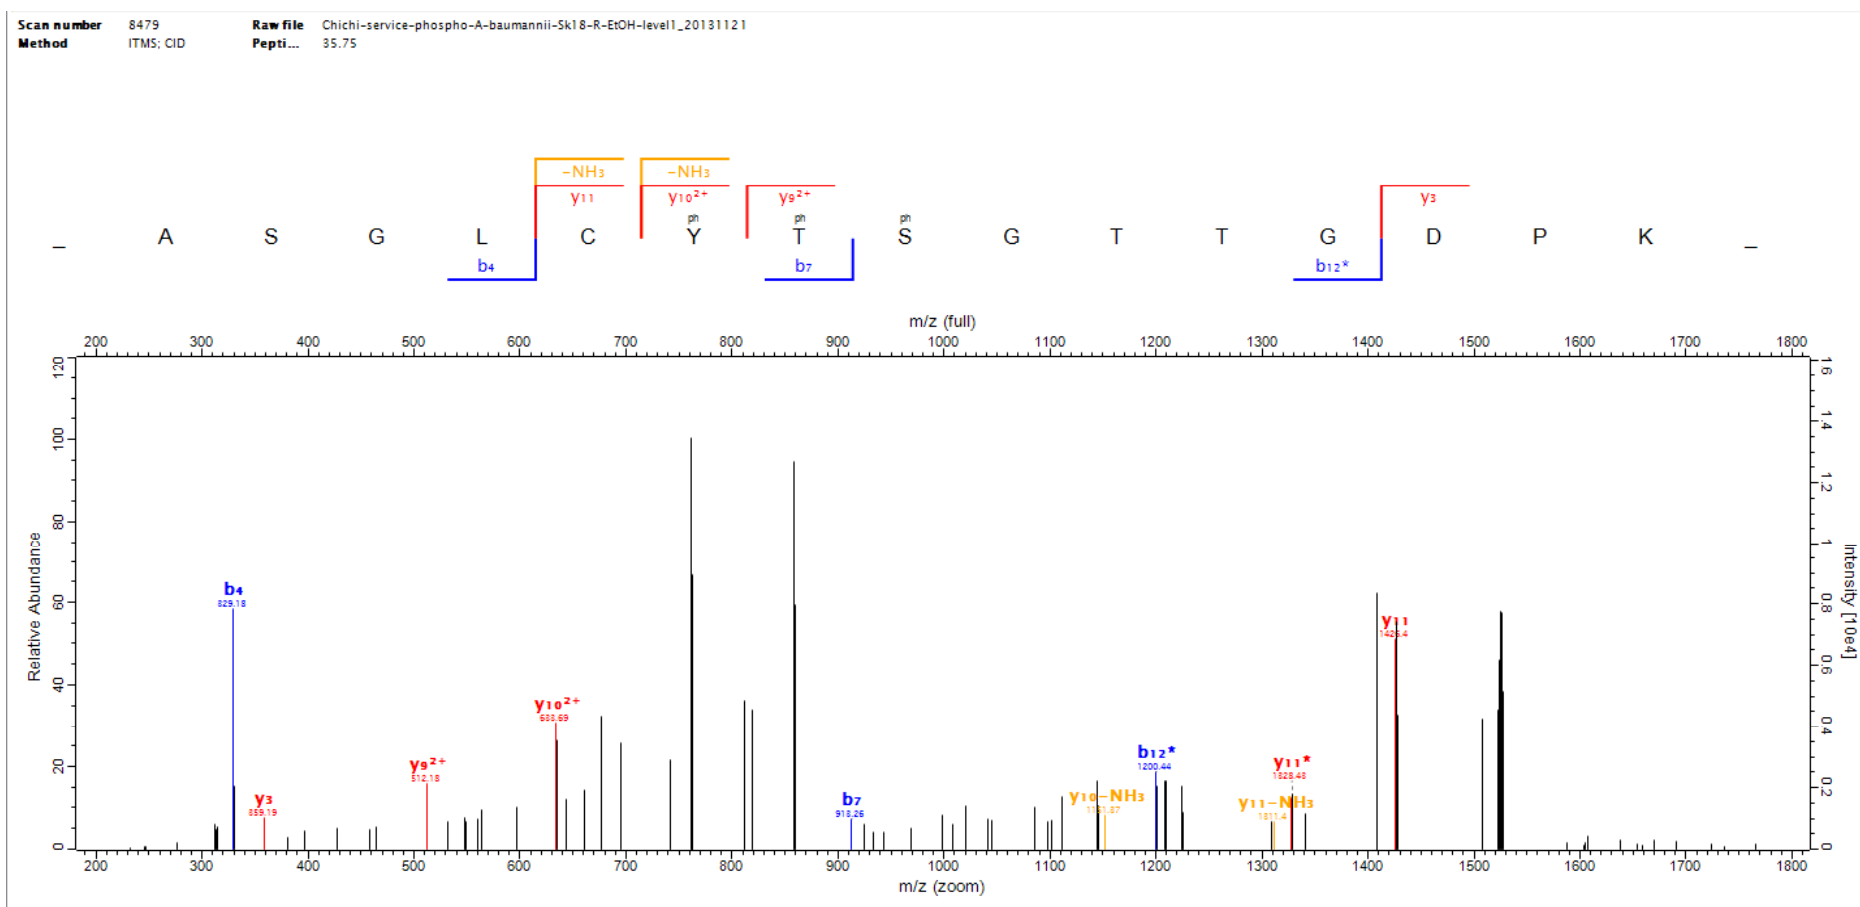

191

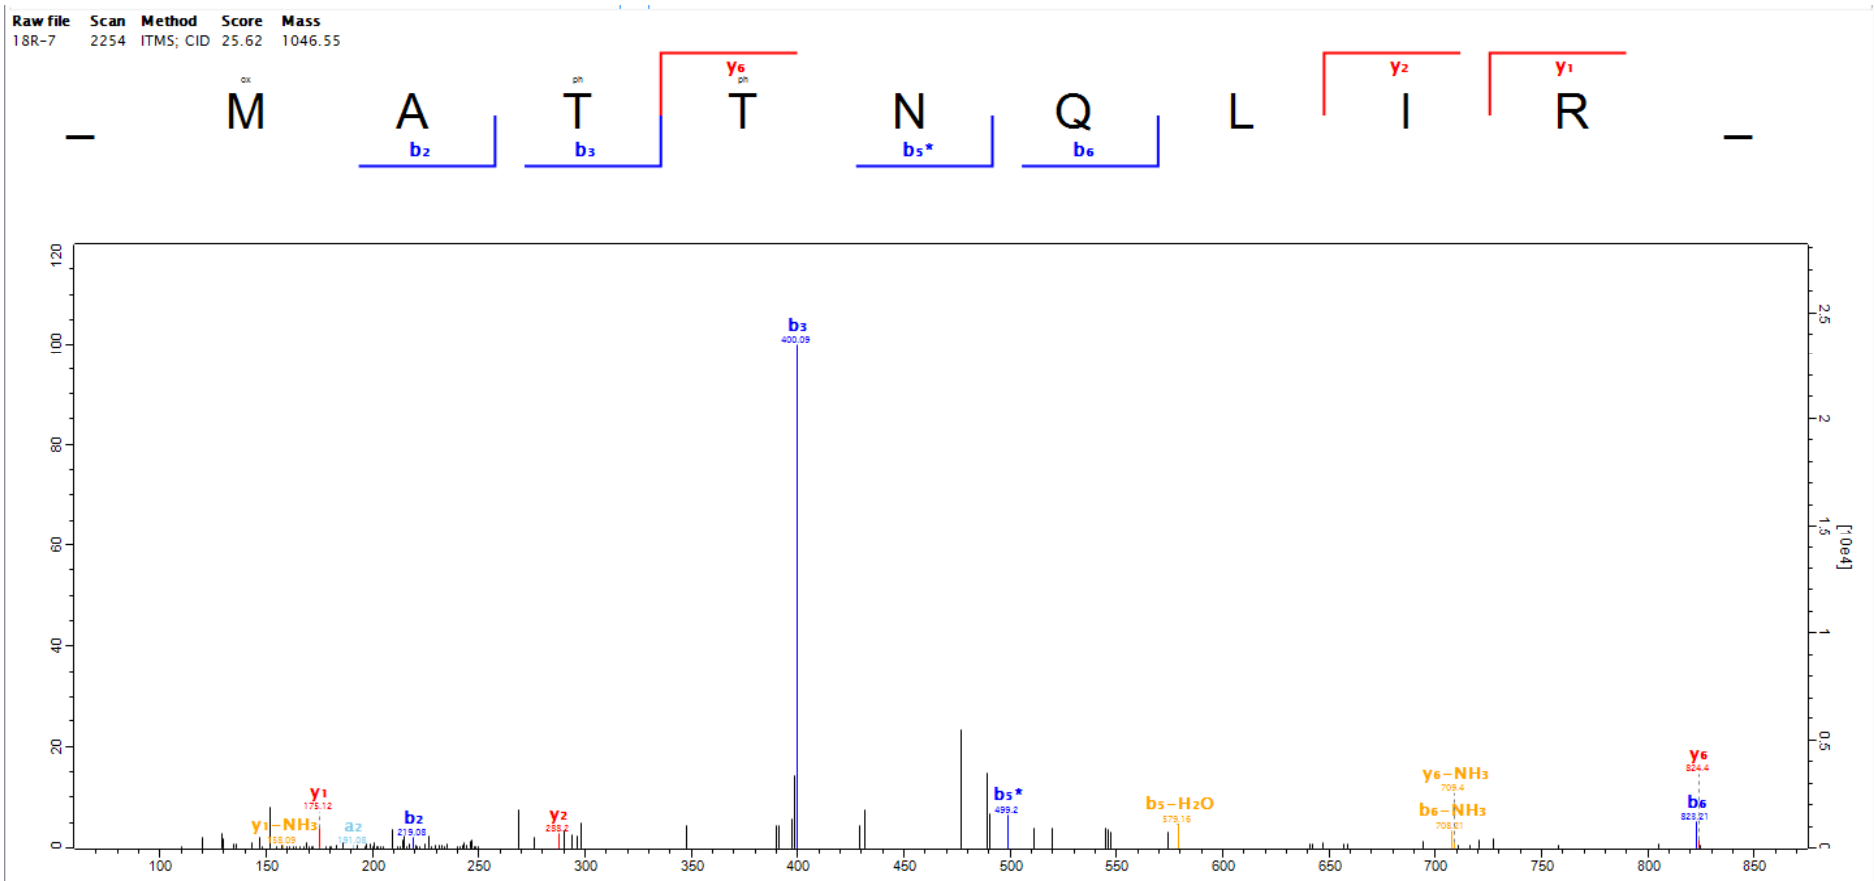

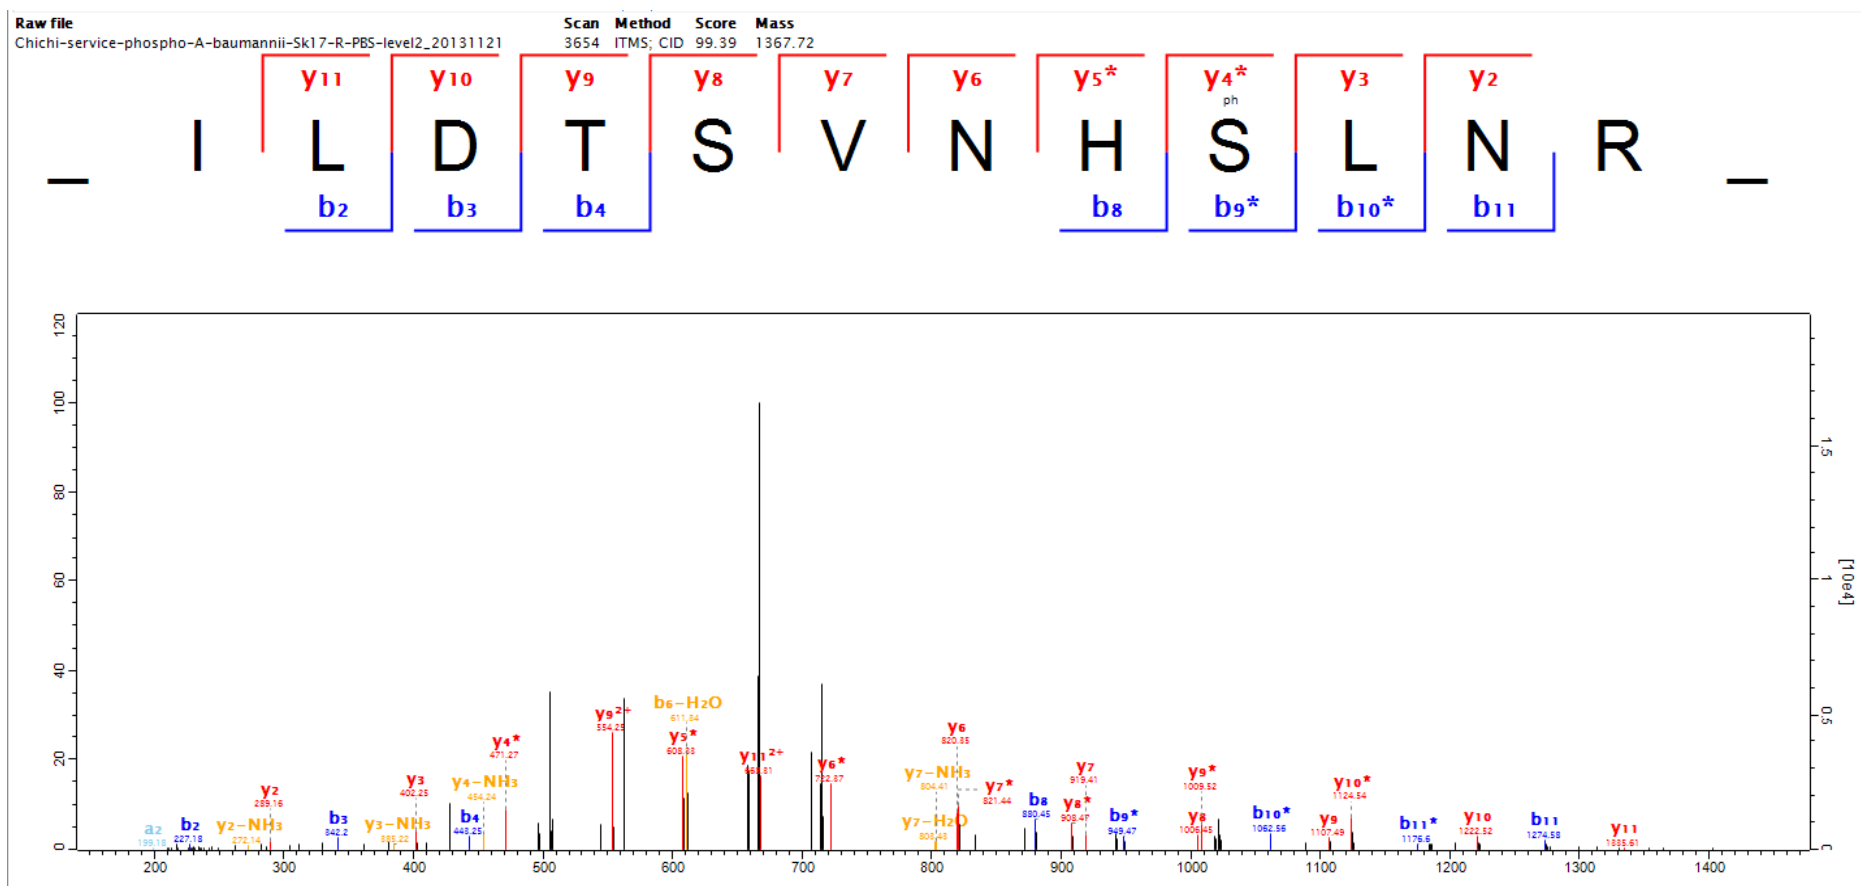

193

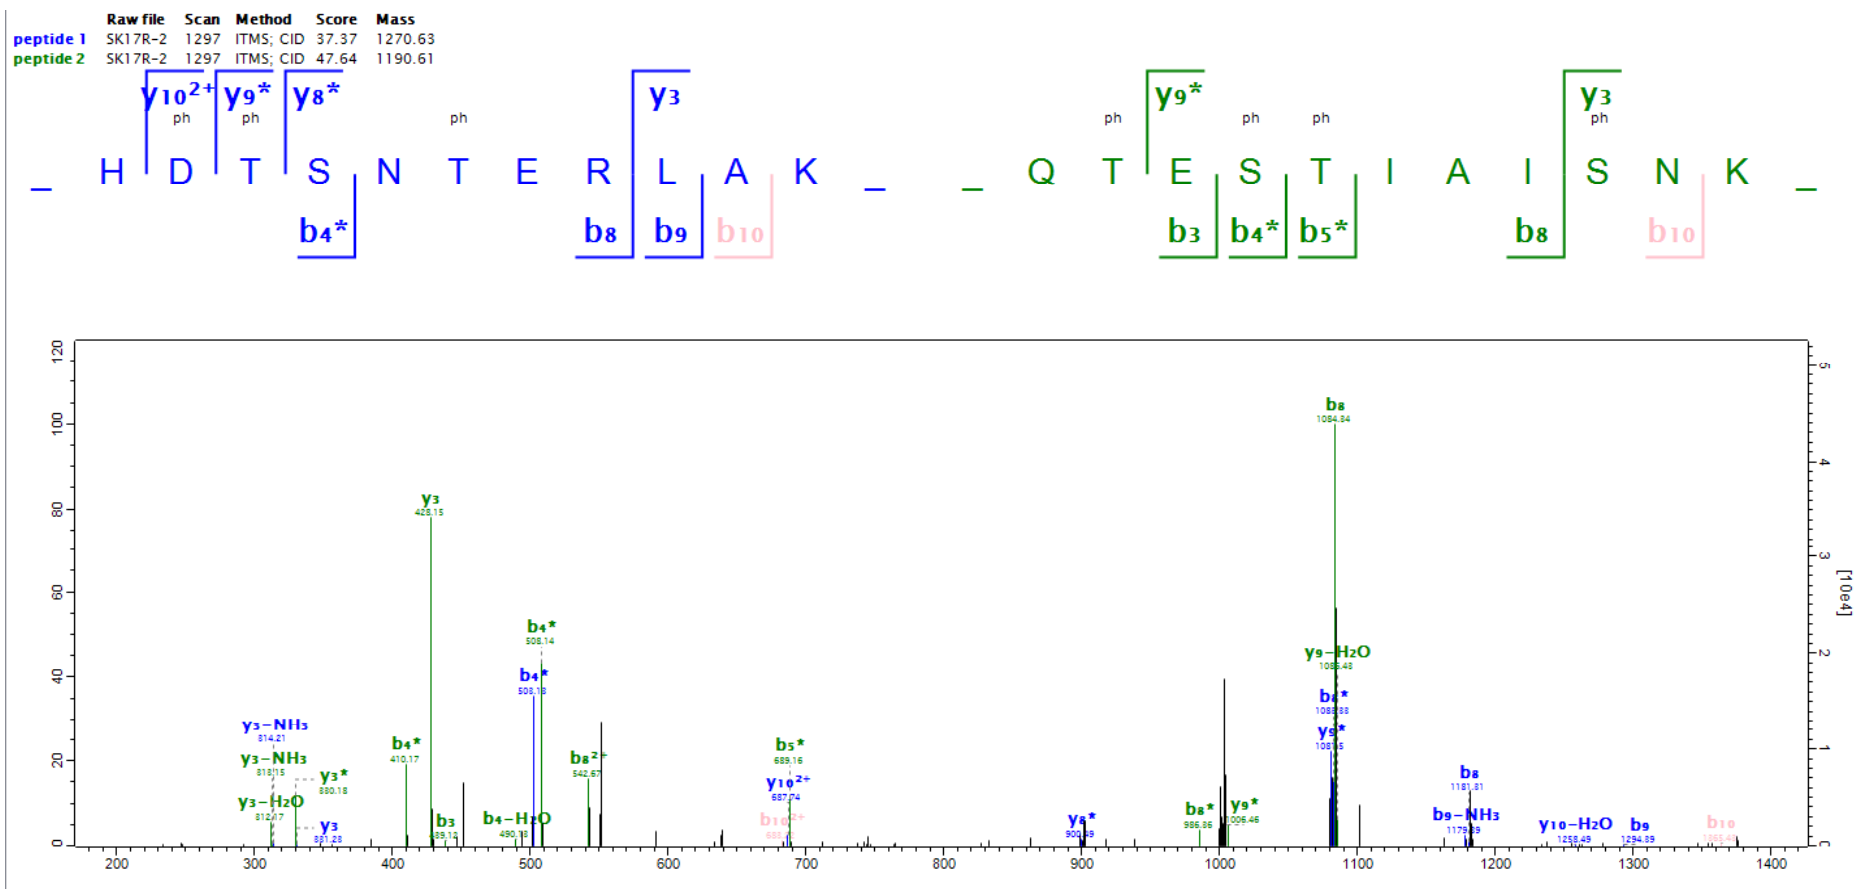

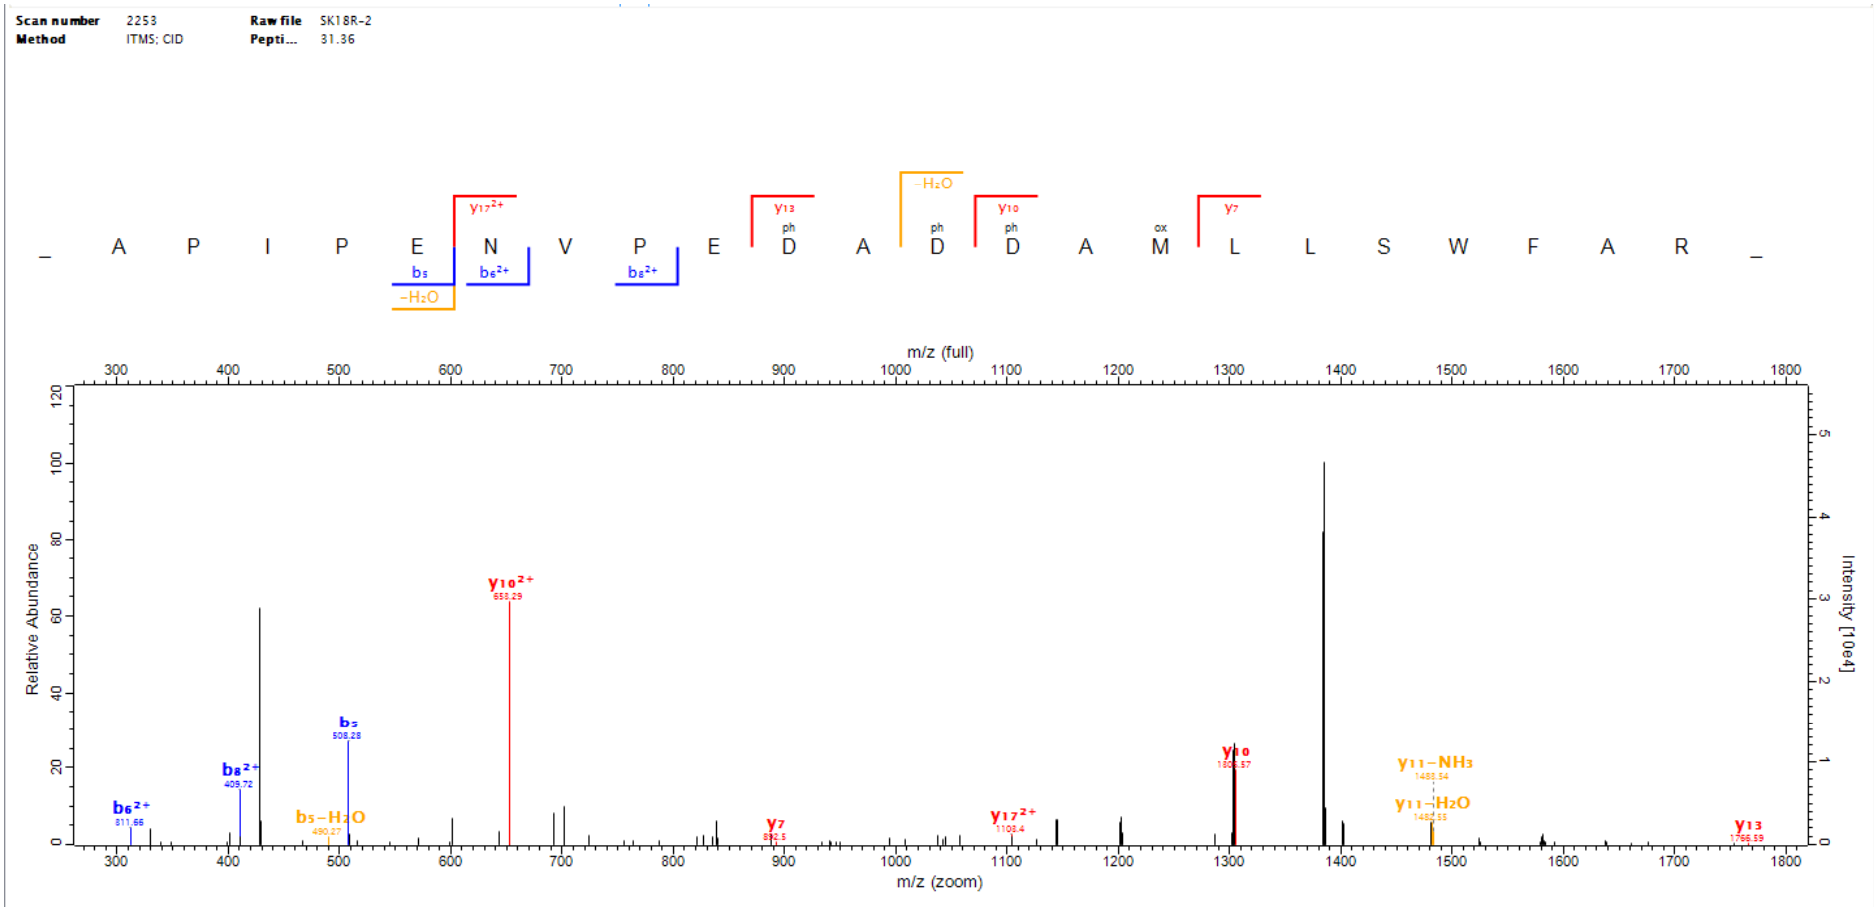

Scan number 4135 Raw file Chichi-service-phospho-A-baumannii-Sk17-R-EtOH-level2\_20131121  
 Method ITMS; CID Pepti... 67.7

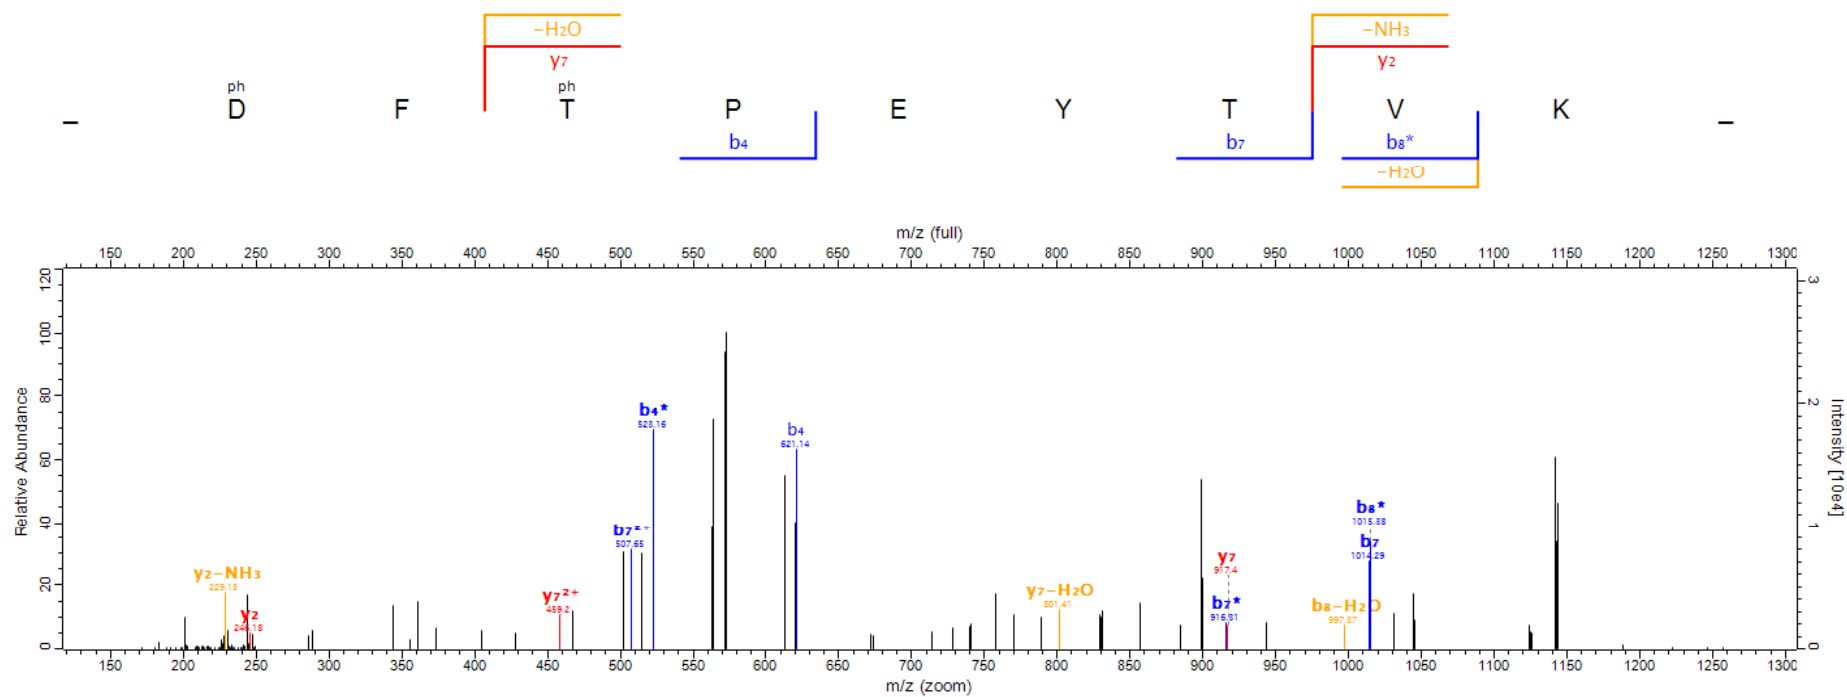



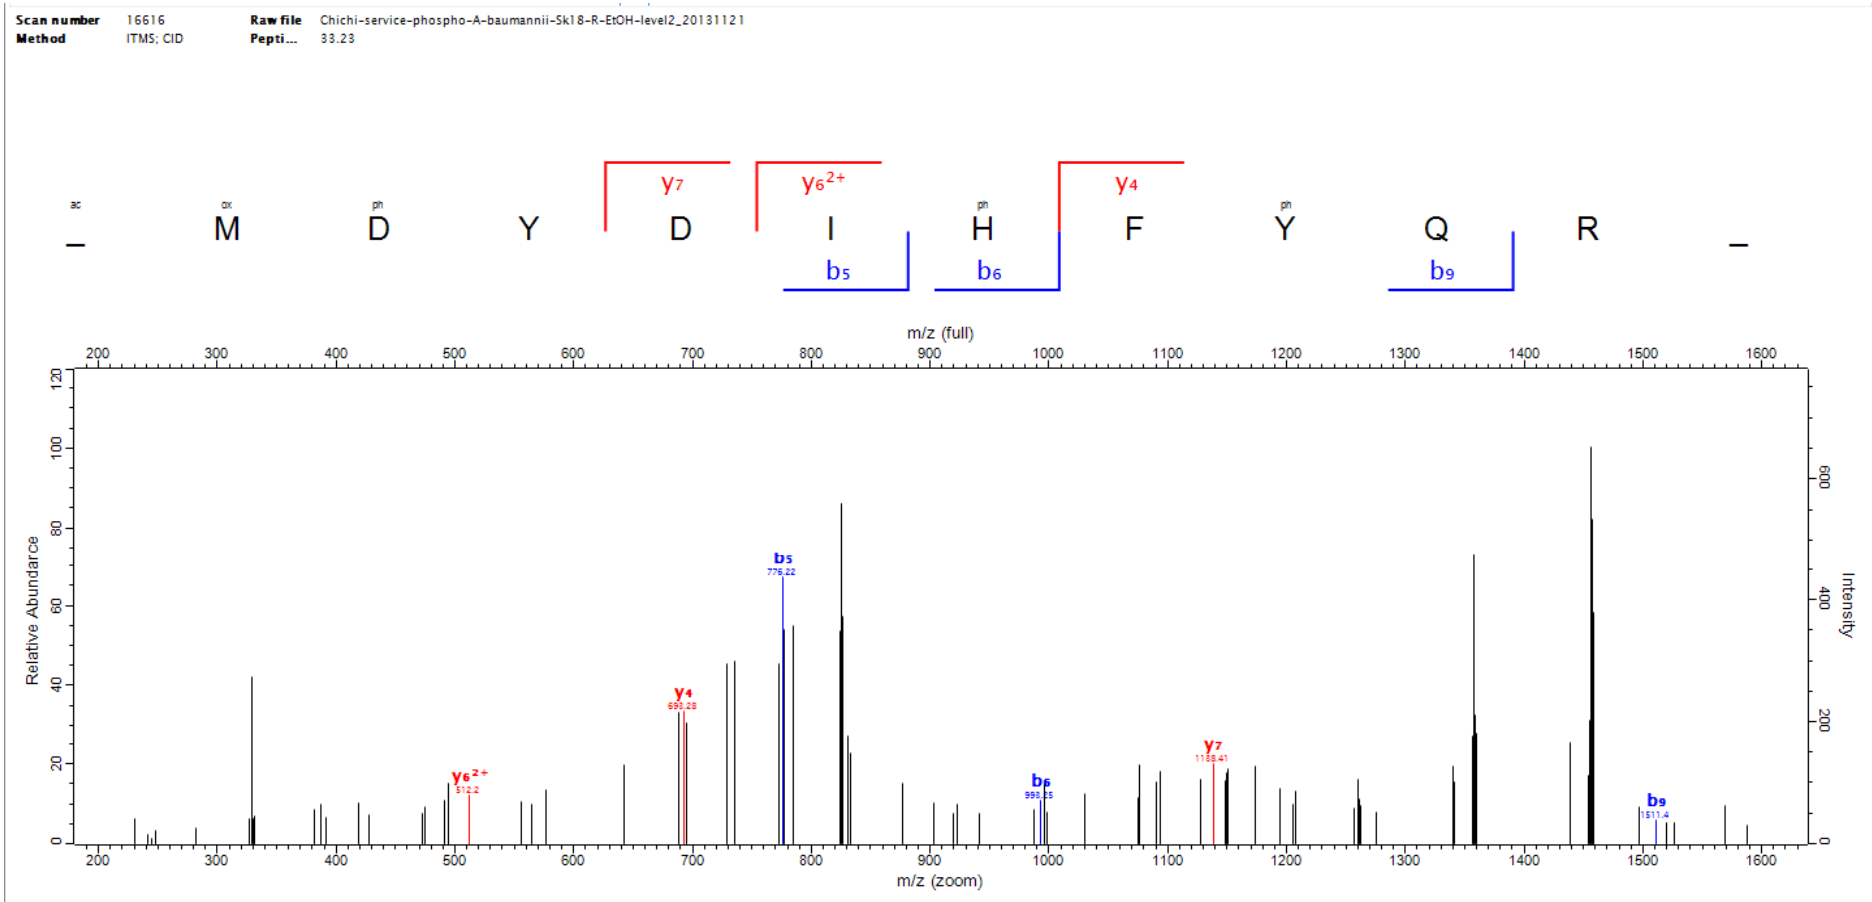

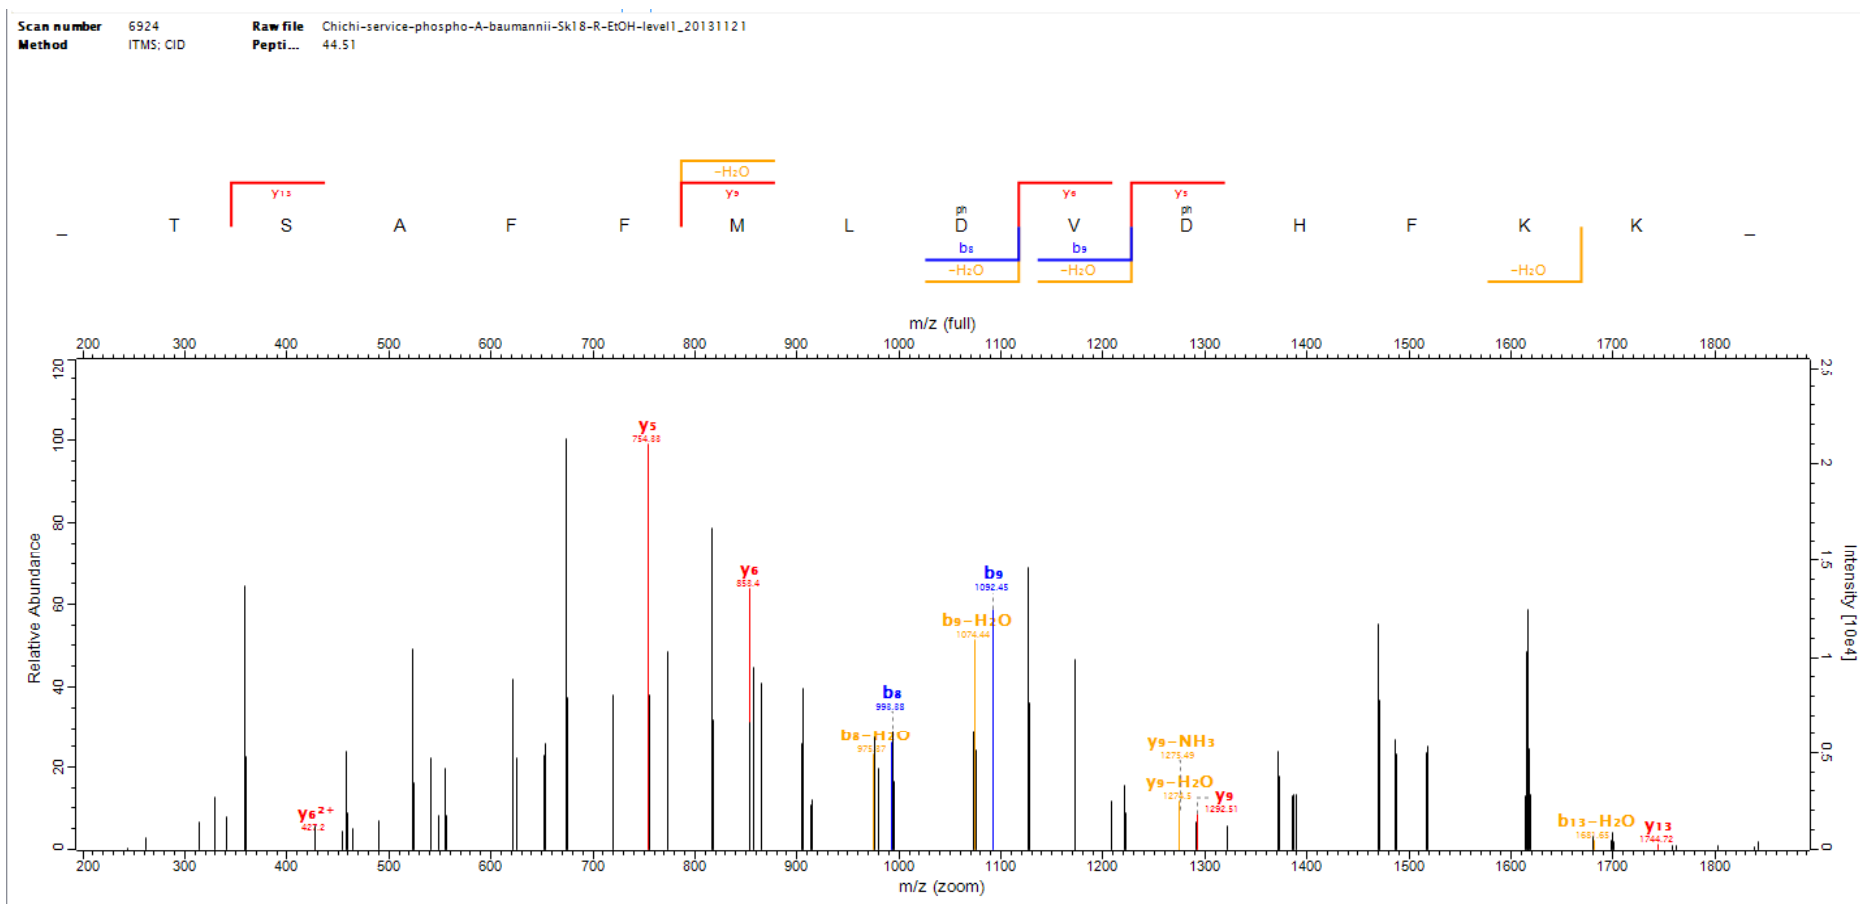

198

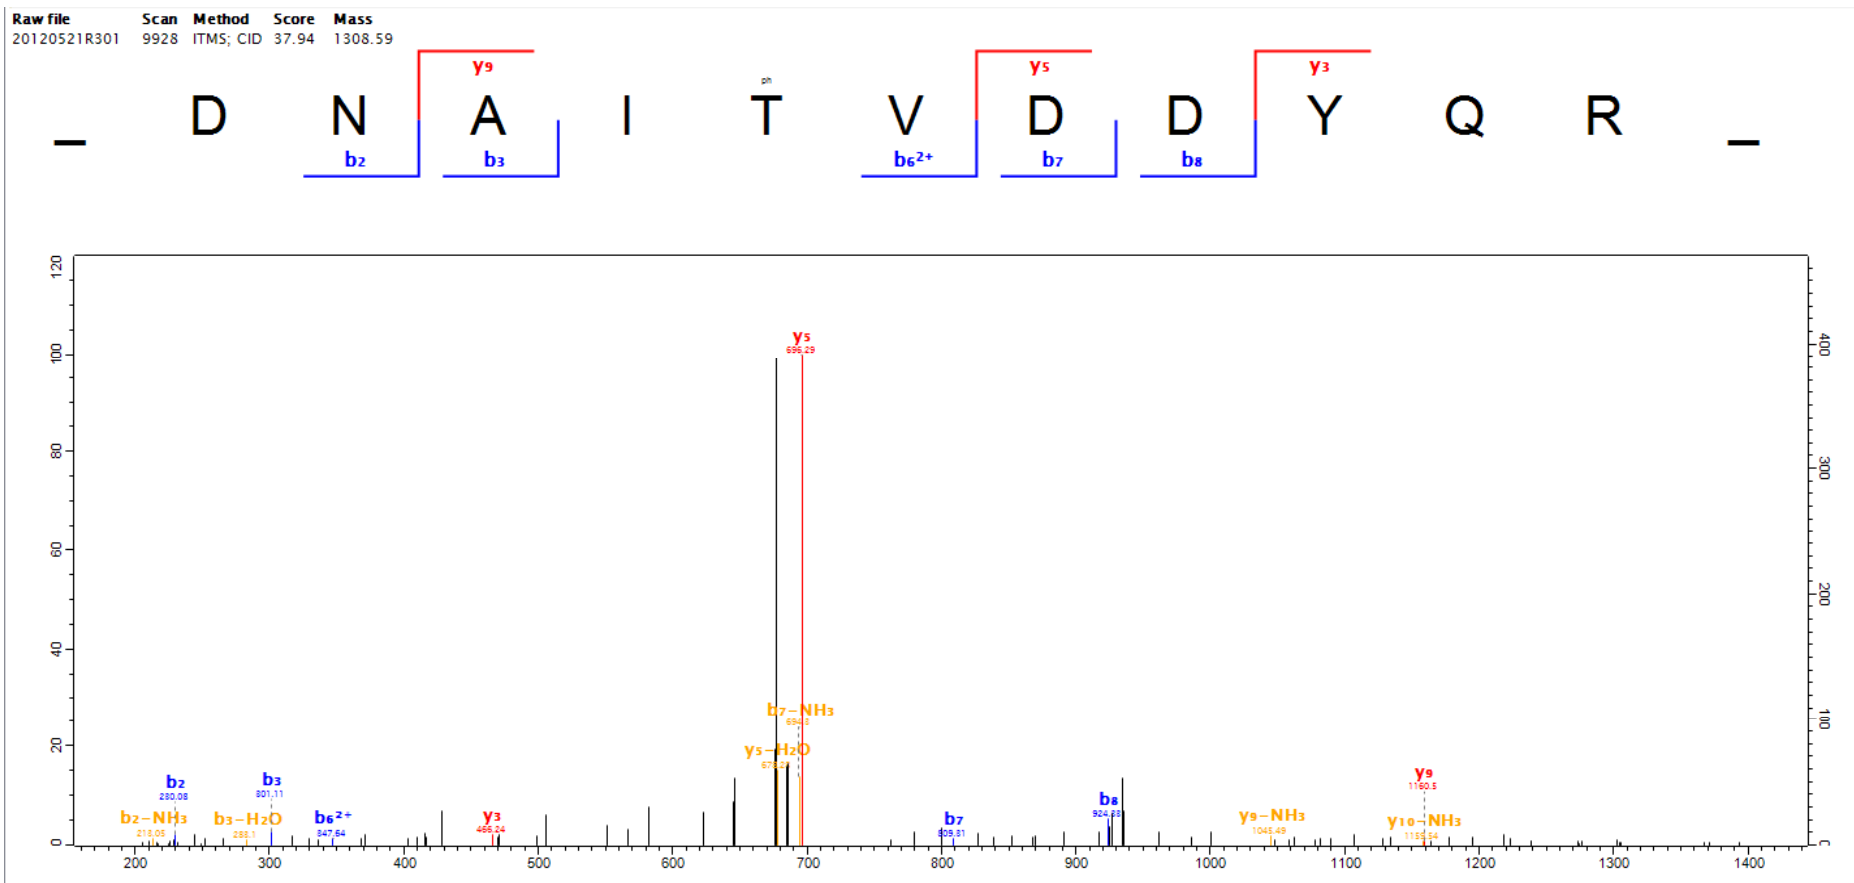

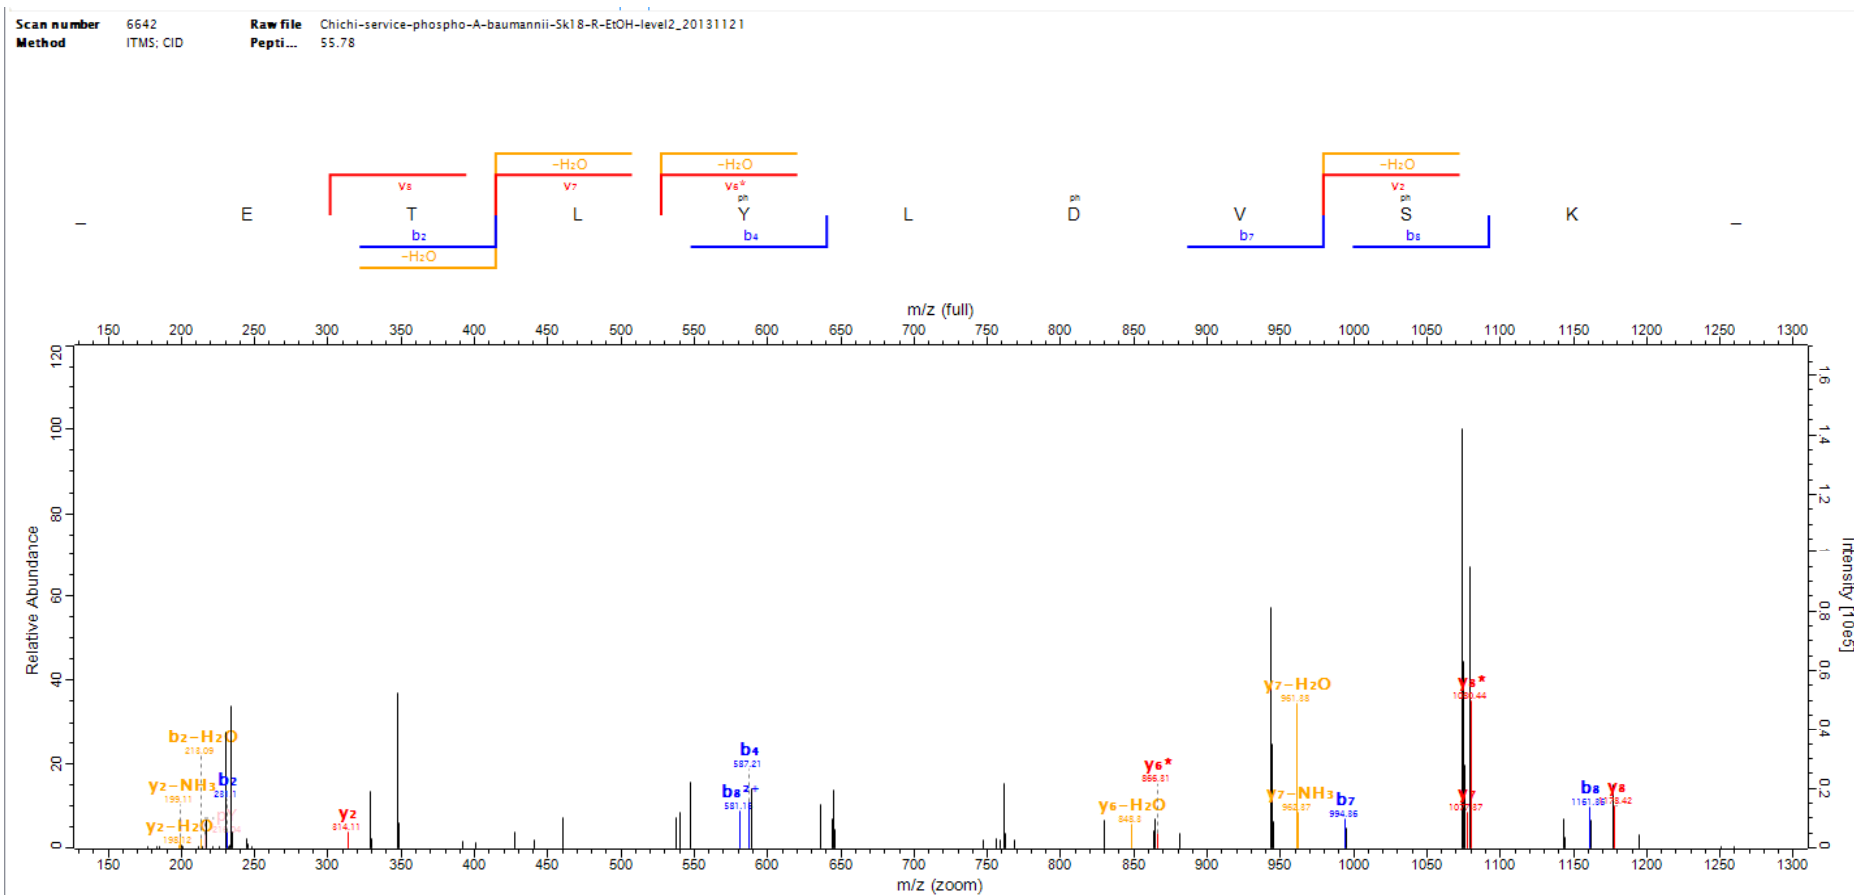

200

Scan number 1287 Raw file Chichi-service-phospho-A-baumannii-Sk17-R-PBS-level2\_20131121  
Method ITMS: CID Pepti... 33.79

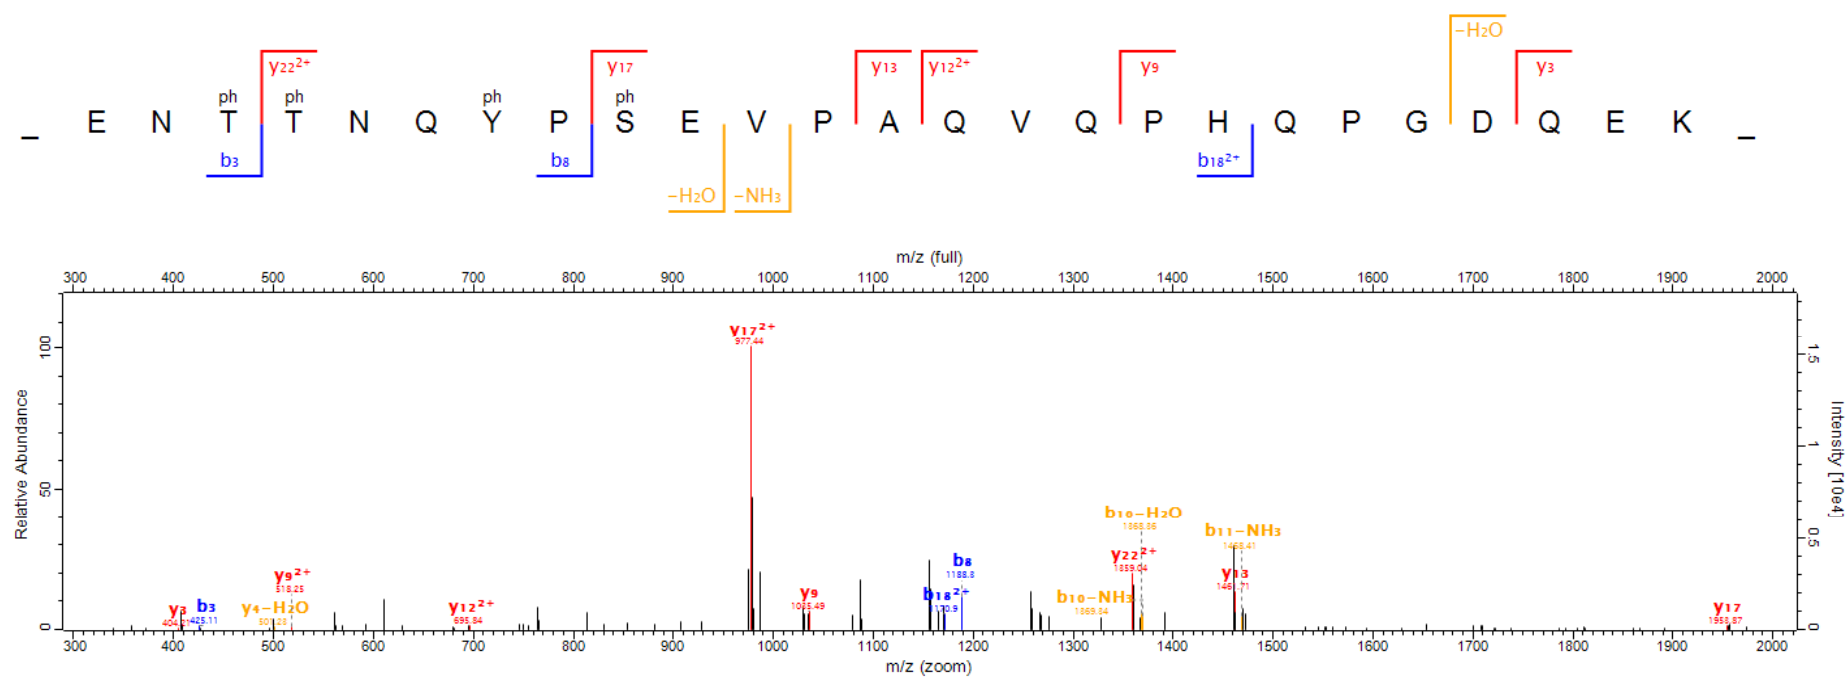

201

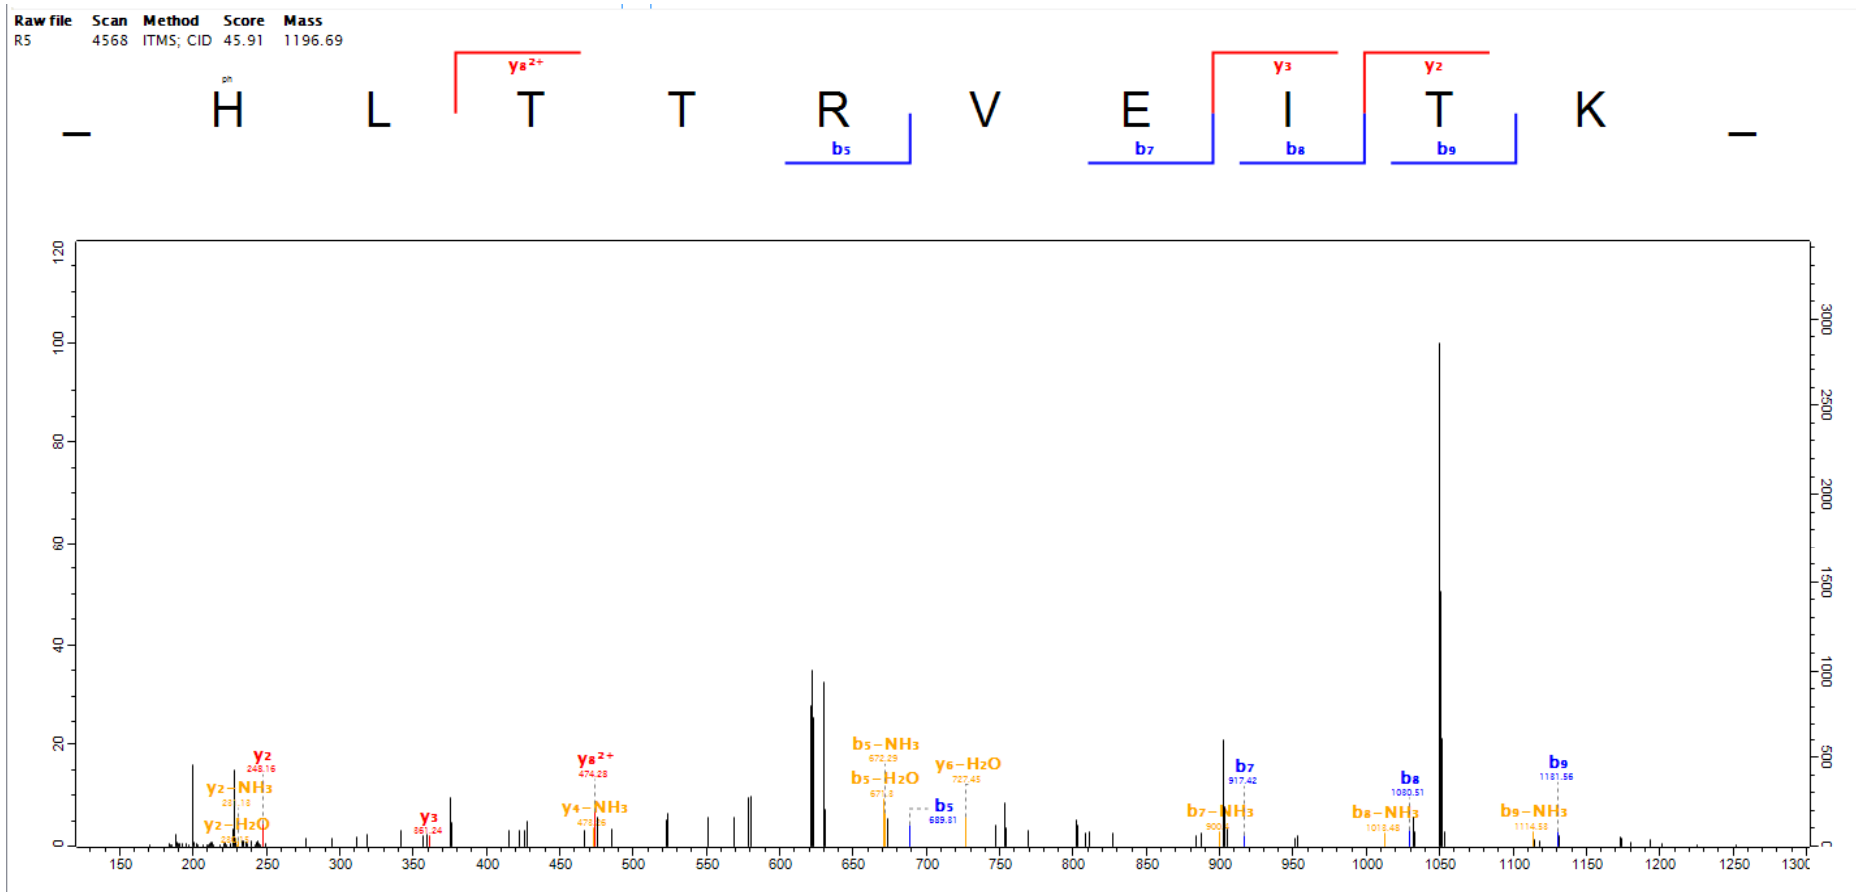

202

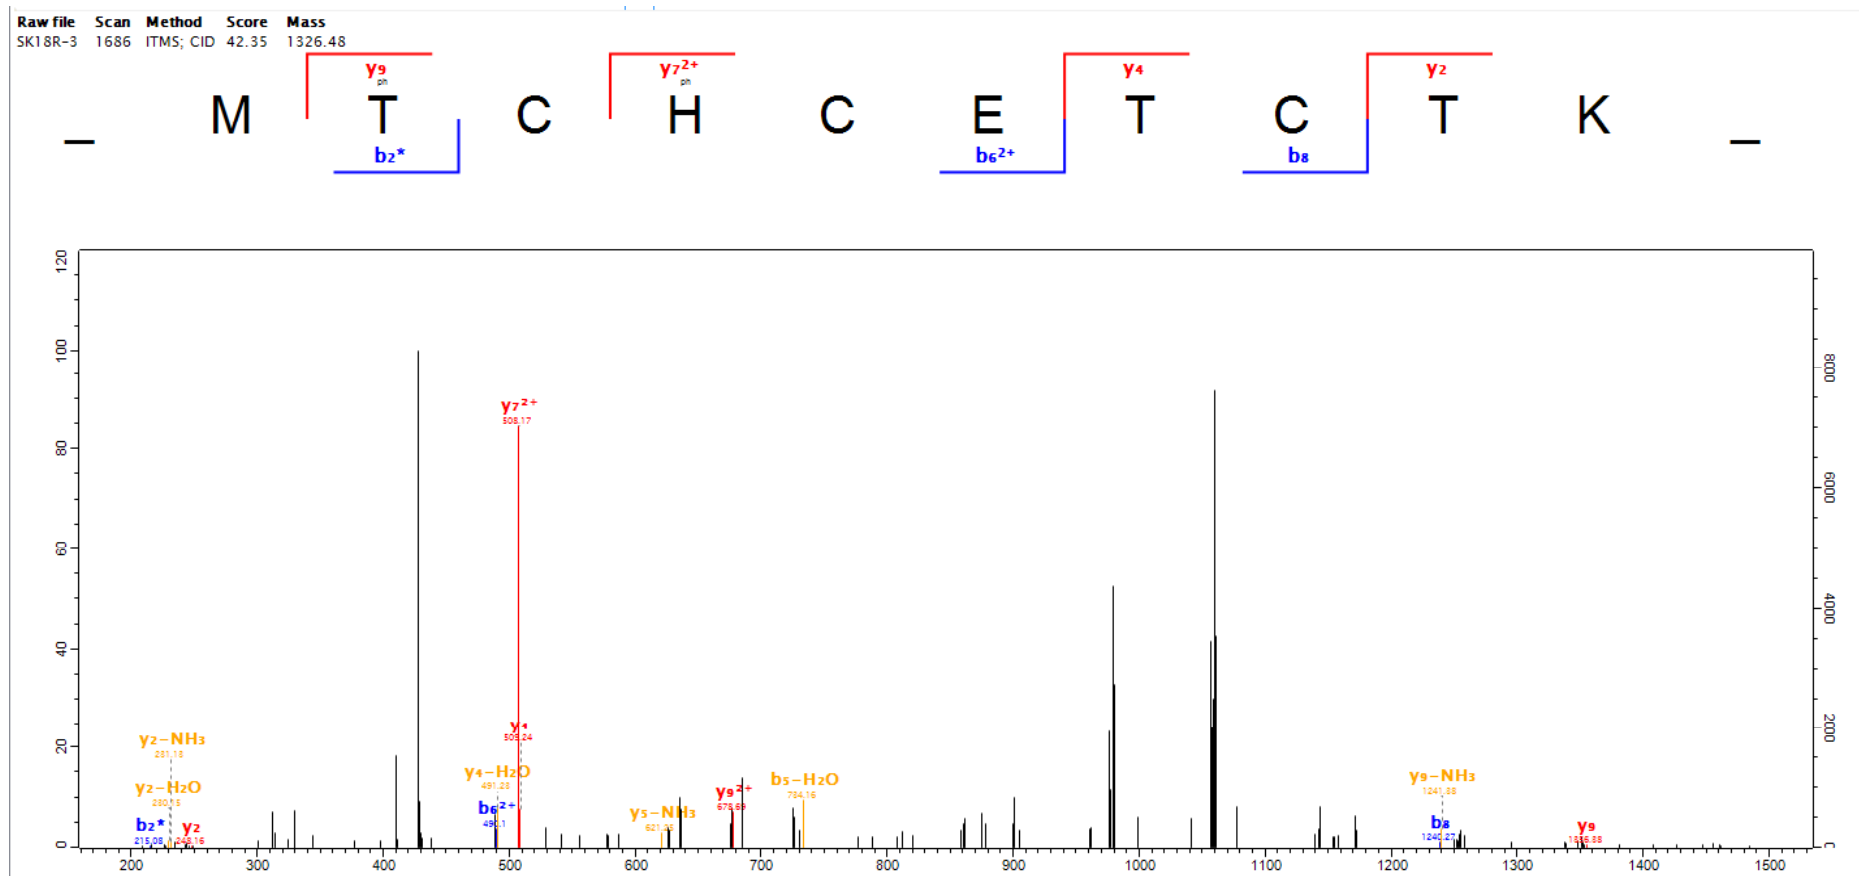

203

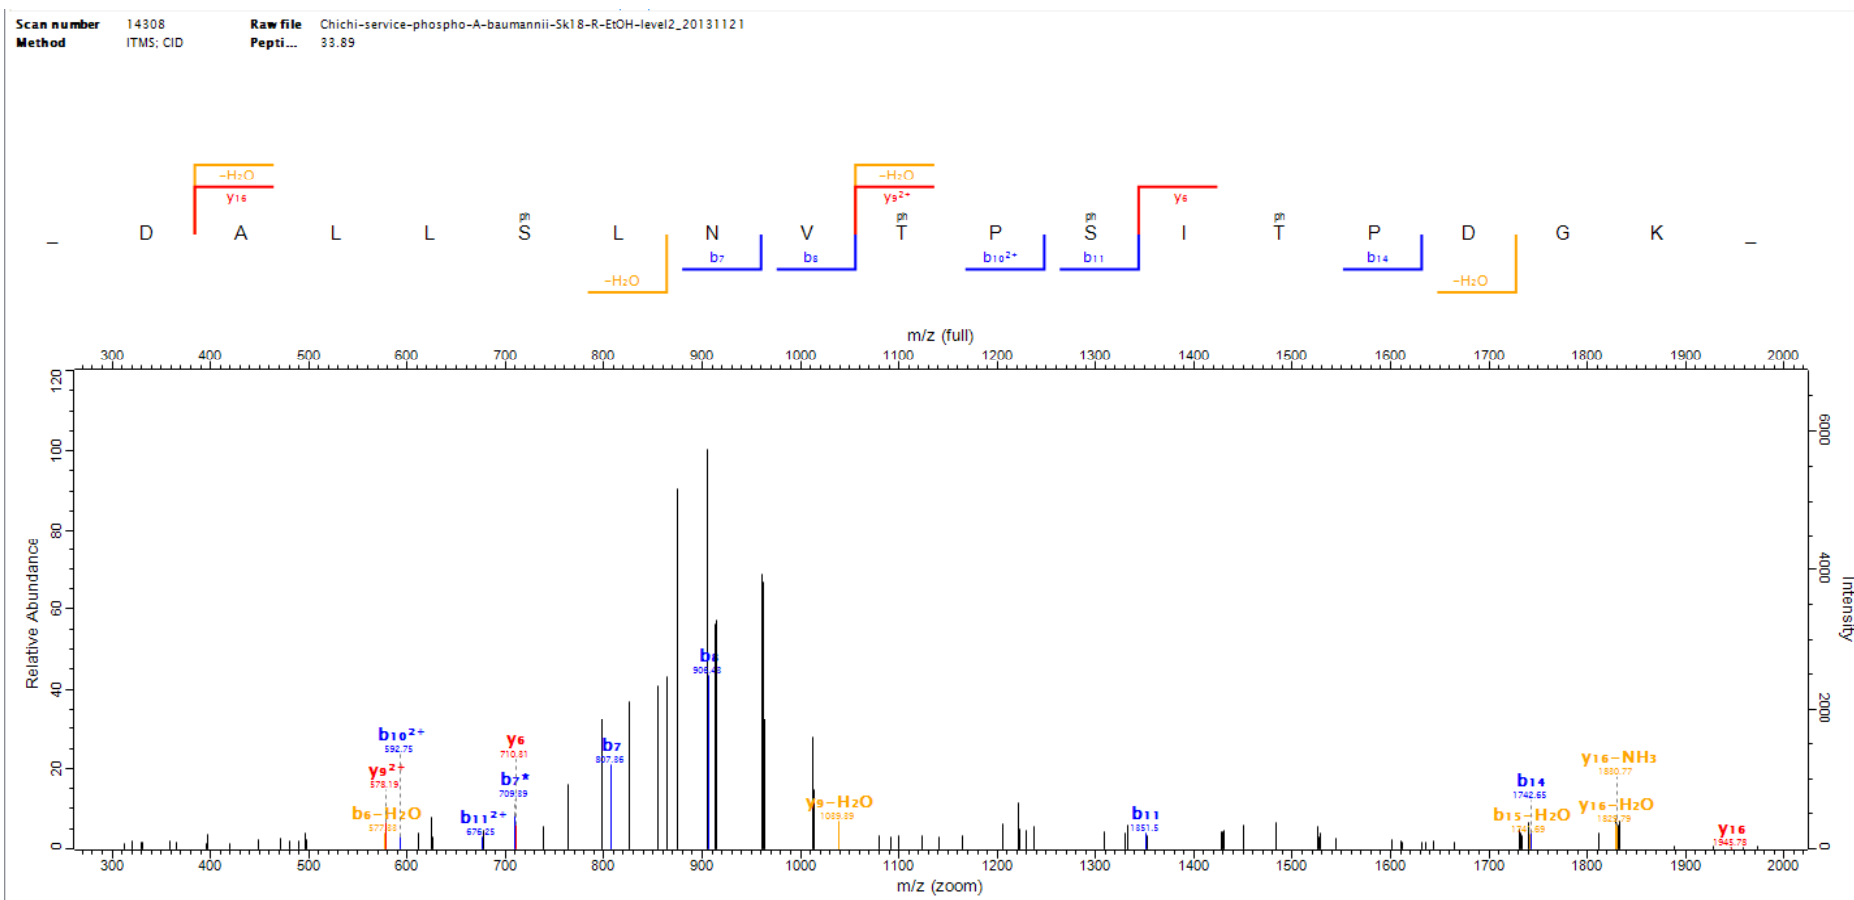



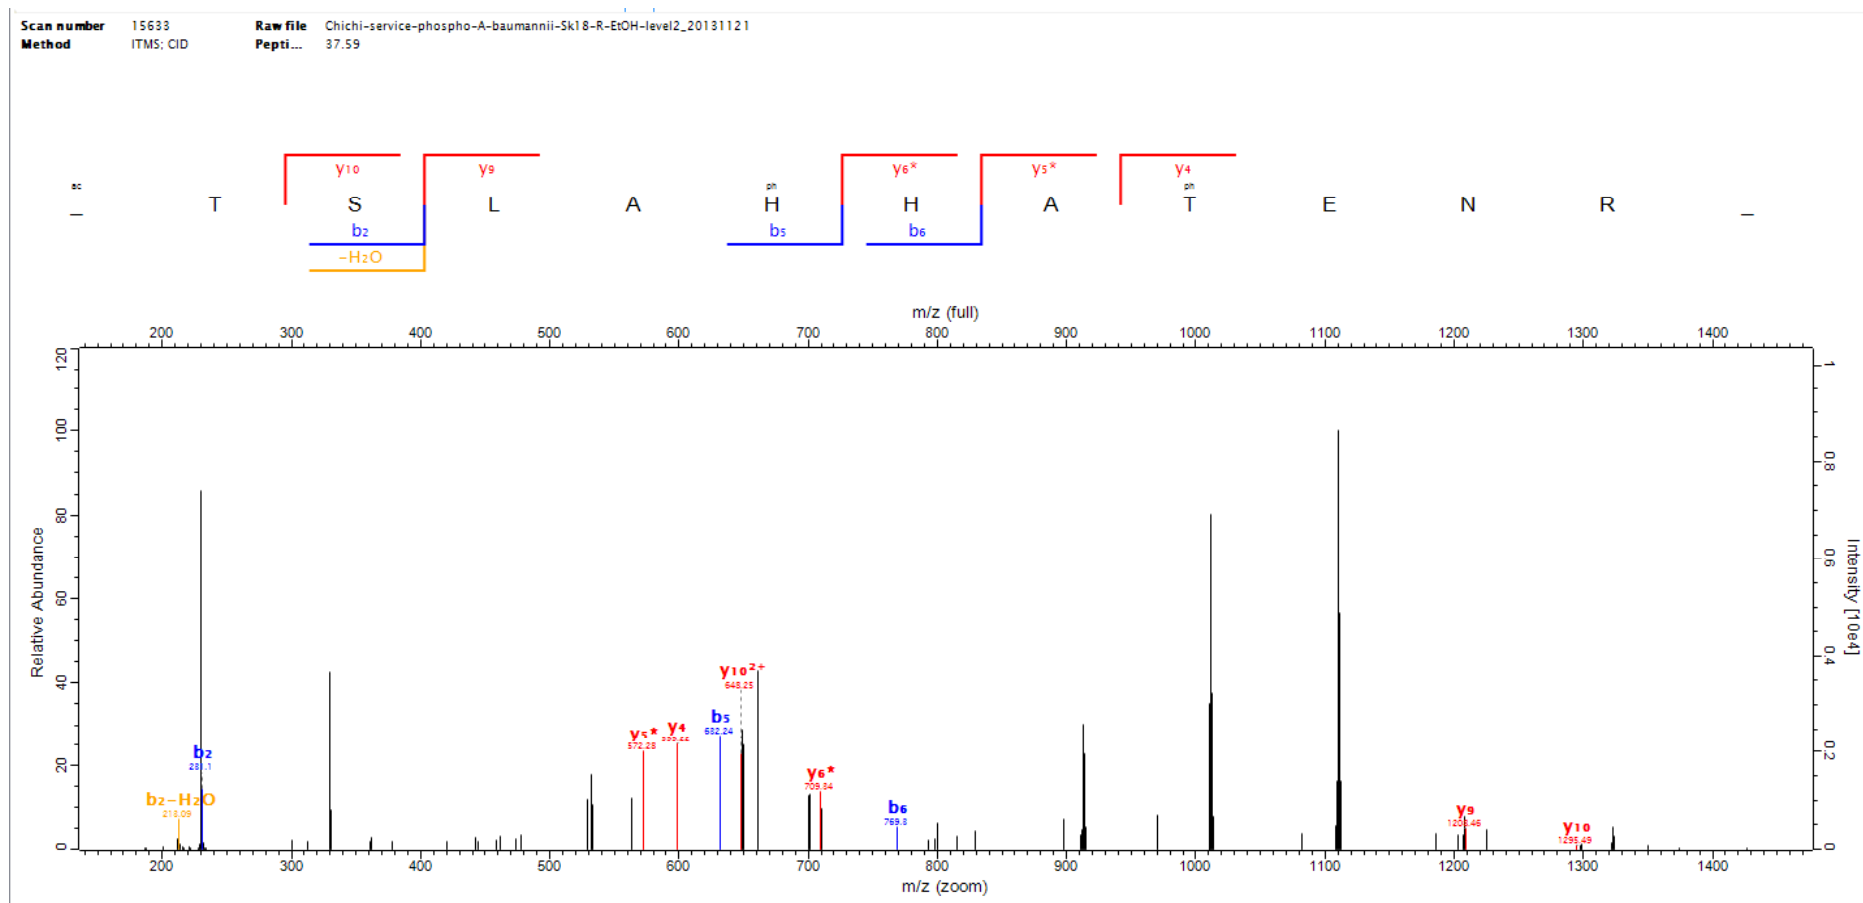

205

Scan number 3969 Raw file Chichi-service-phospho-A-baumannii-Sk18-R-PBS-level1\_20131121  
 Method ITMS: CID Peptide 47.22

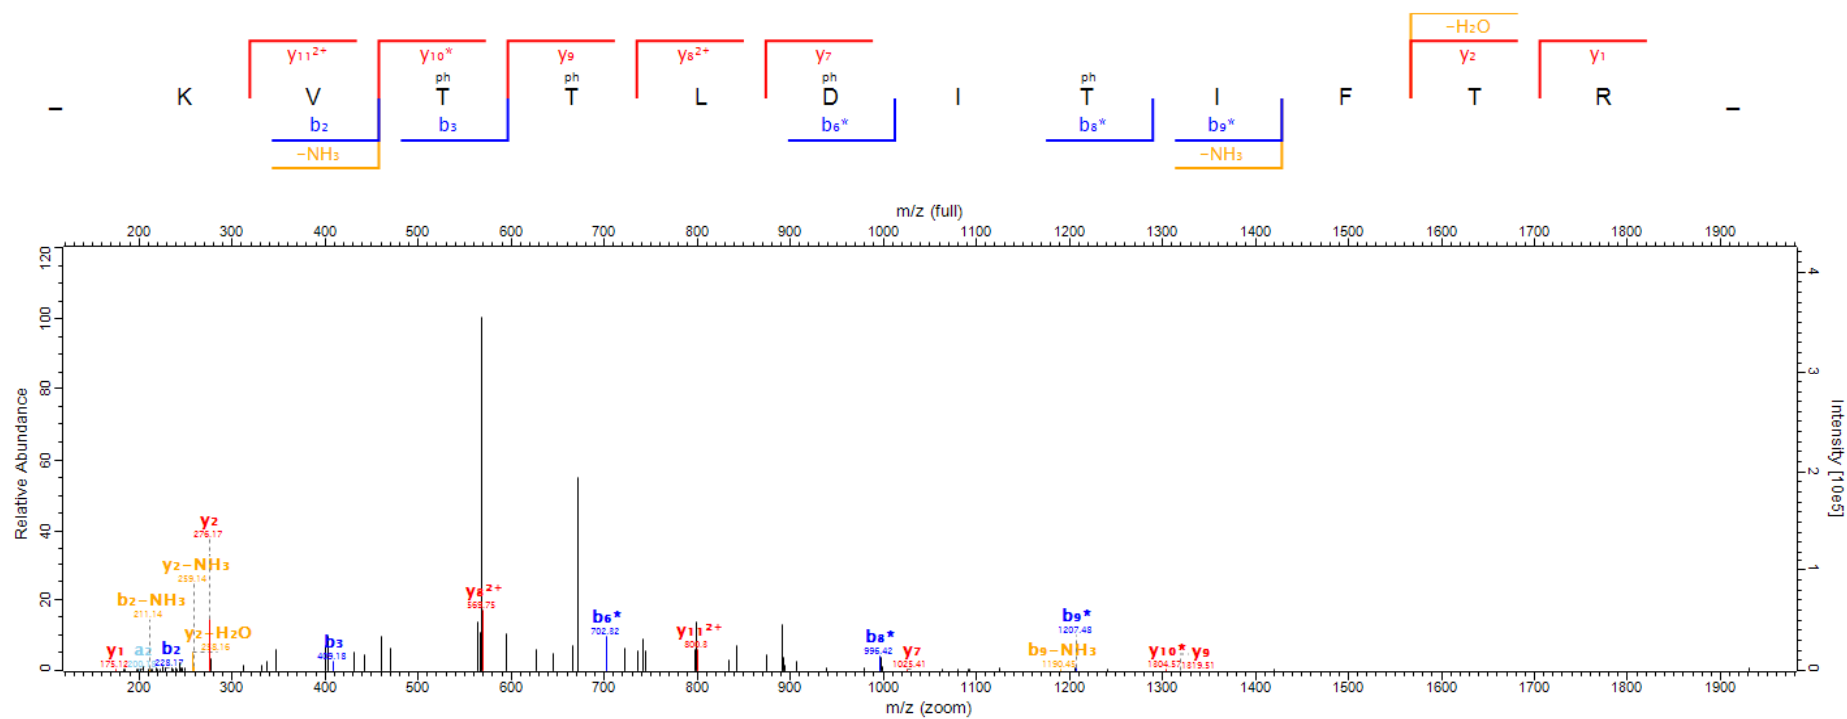

206

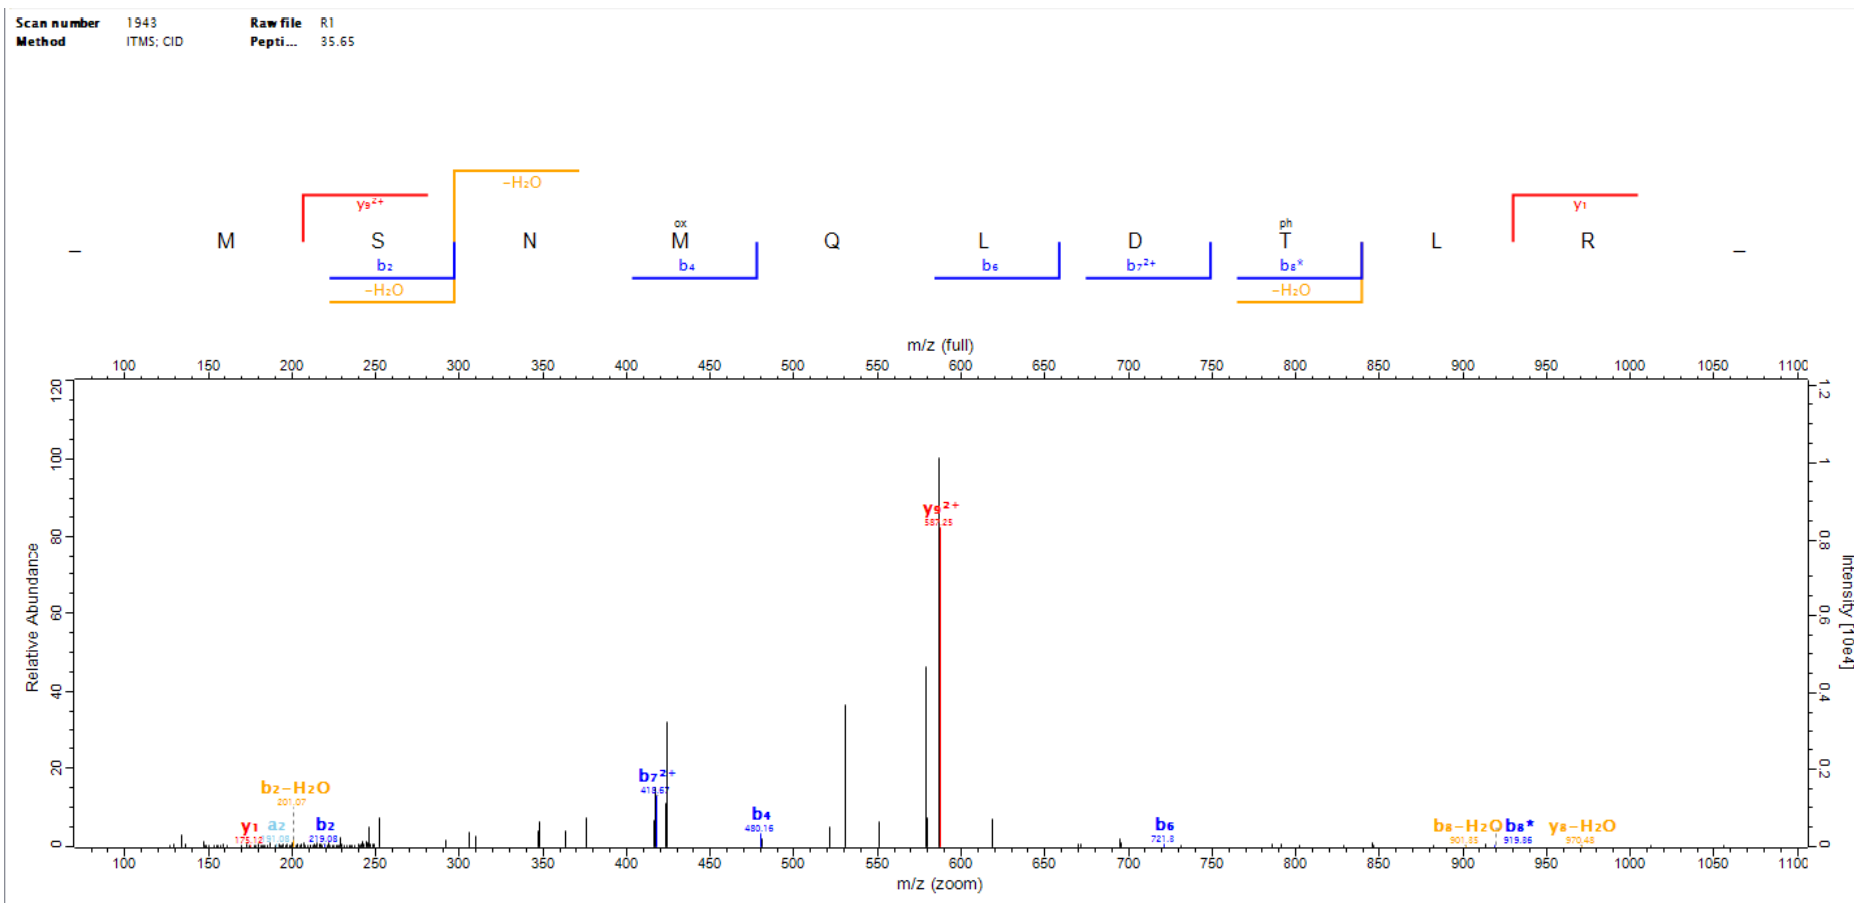

207

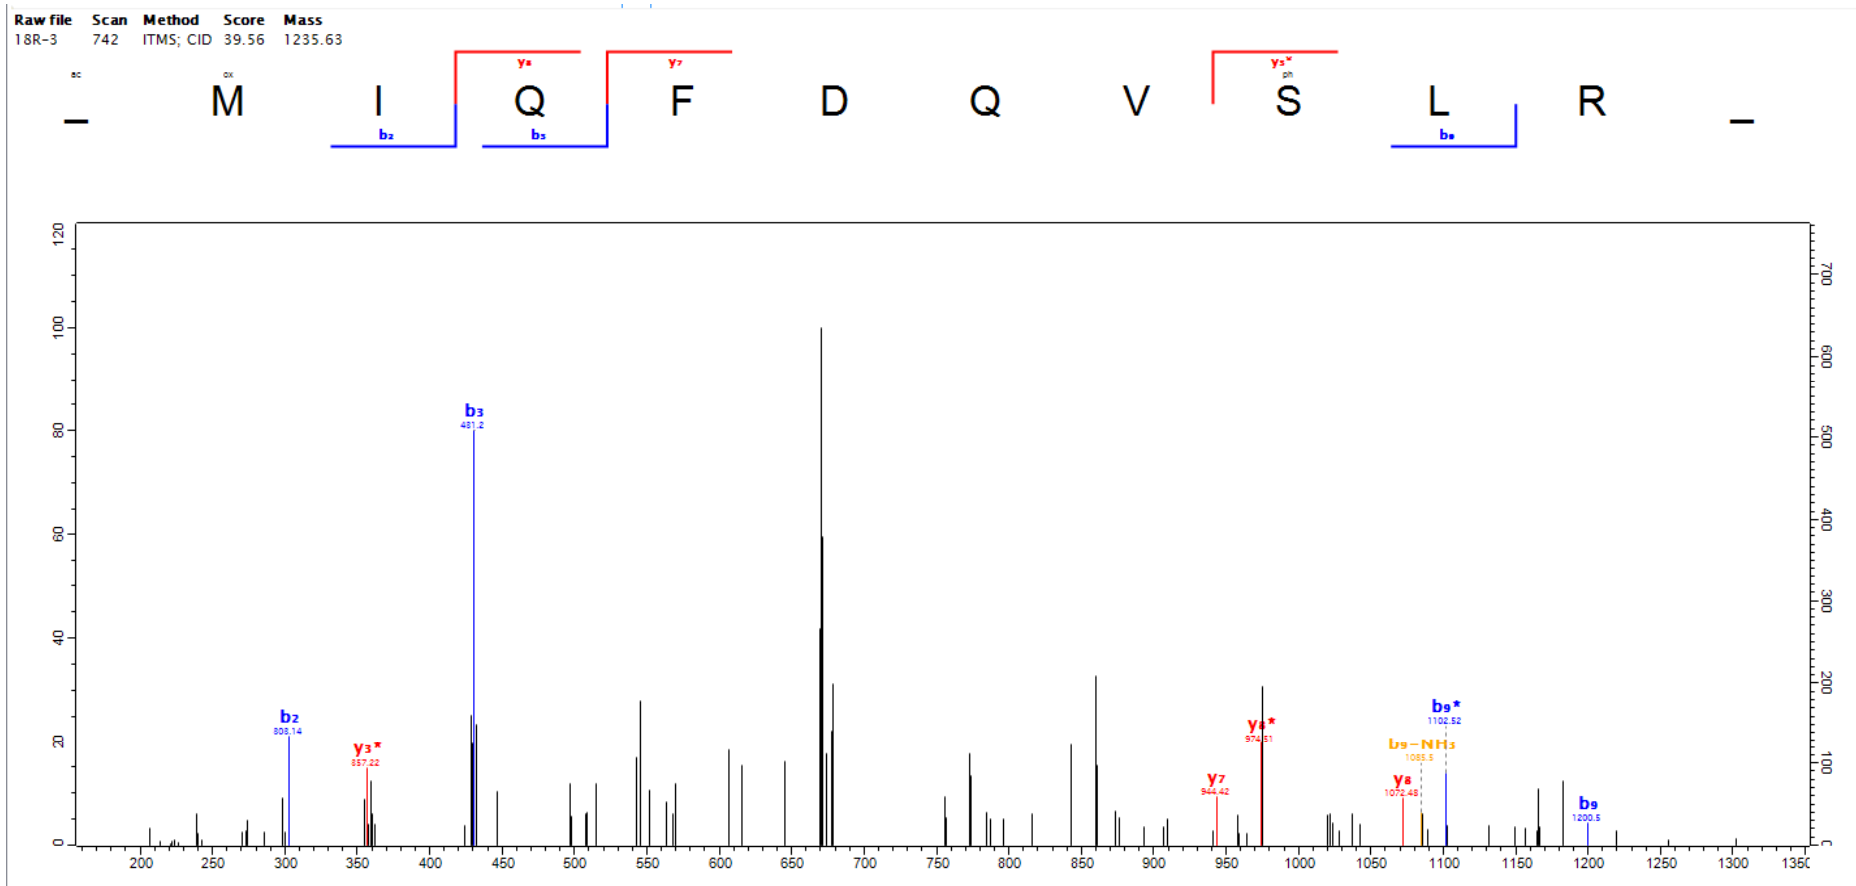

208

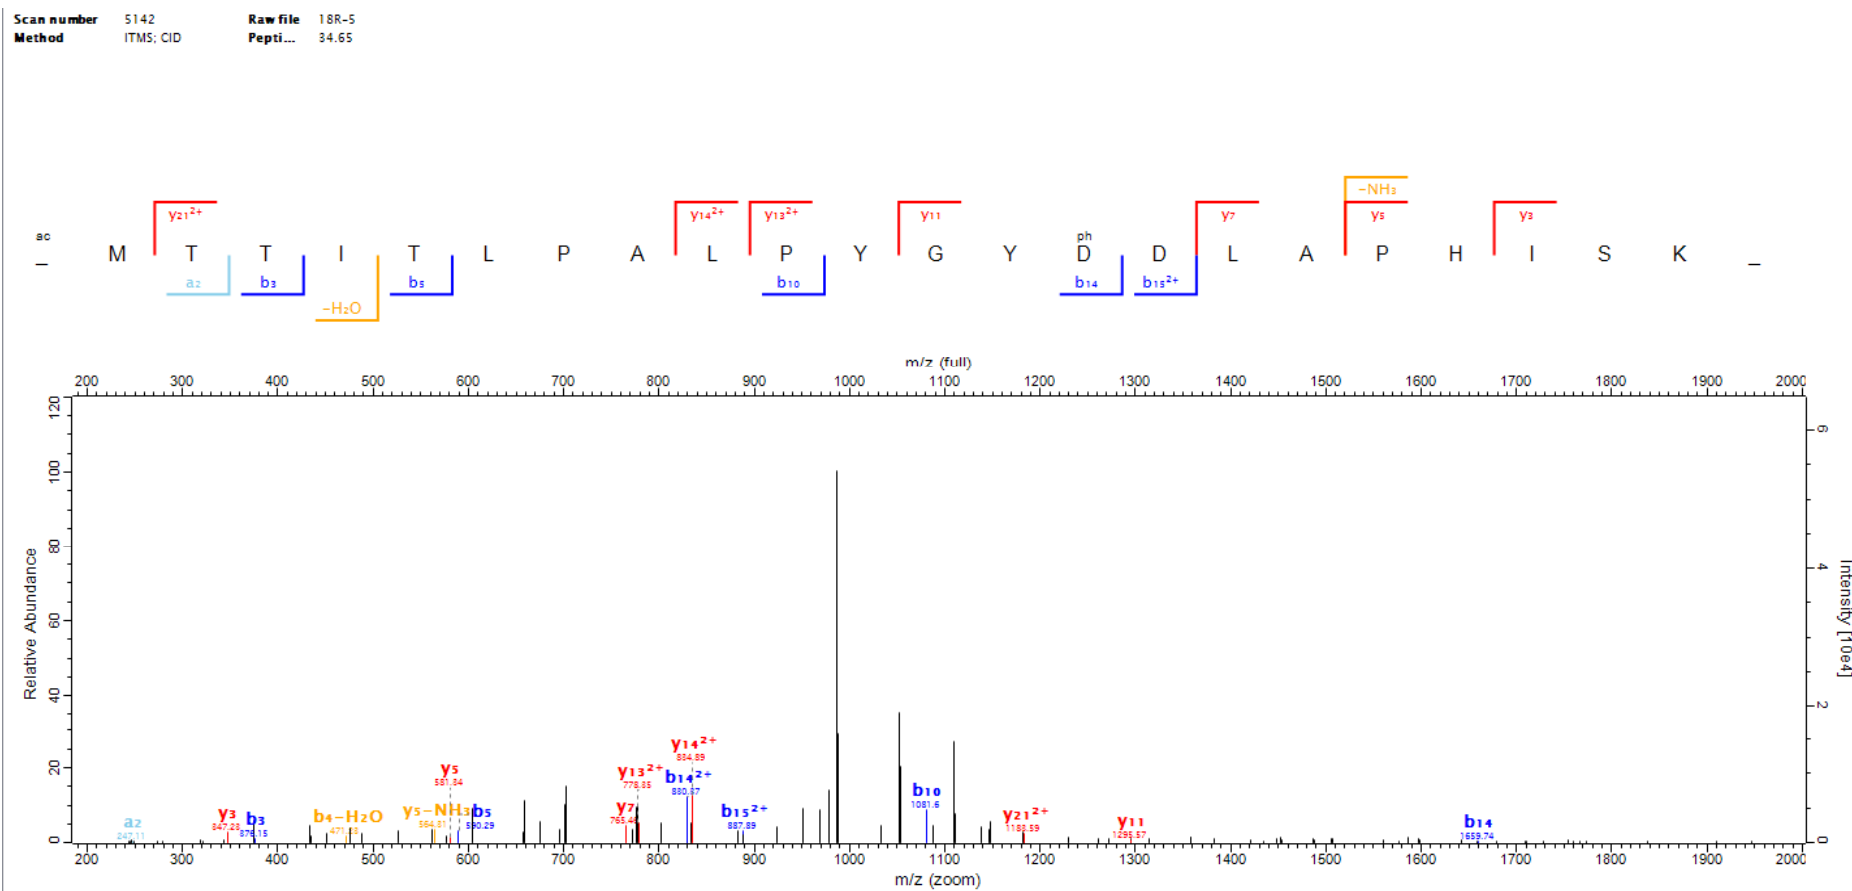

209

Raw file Scan Method Score Mass  
R4 2013 ITMS; CID 38.57 1048.6

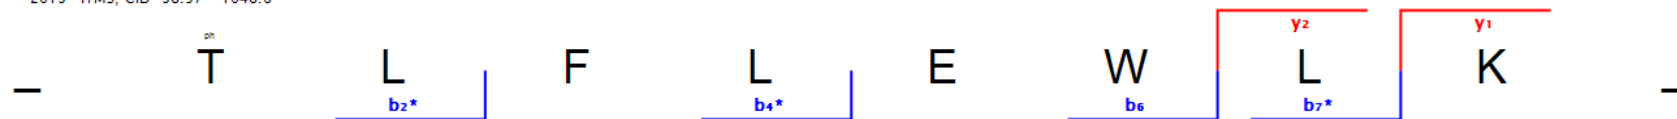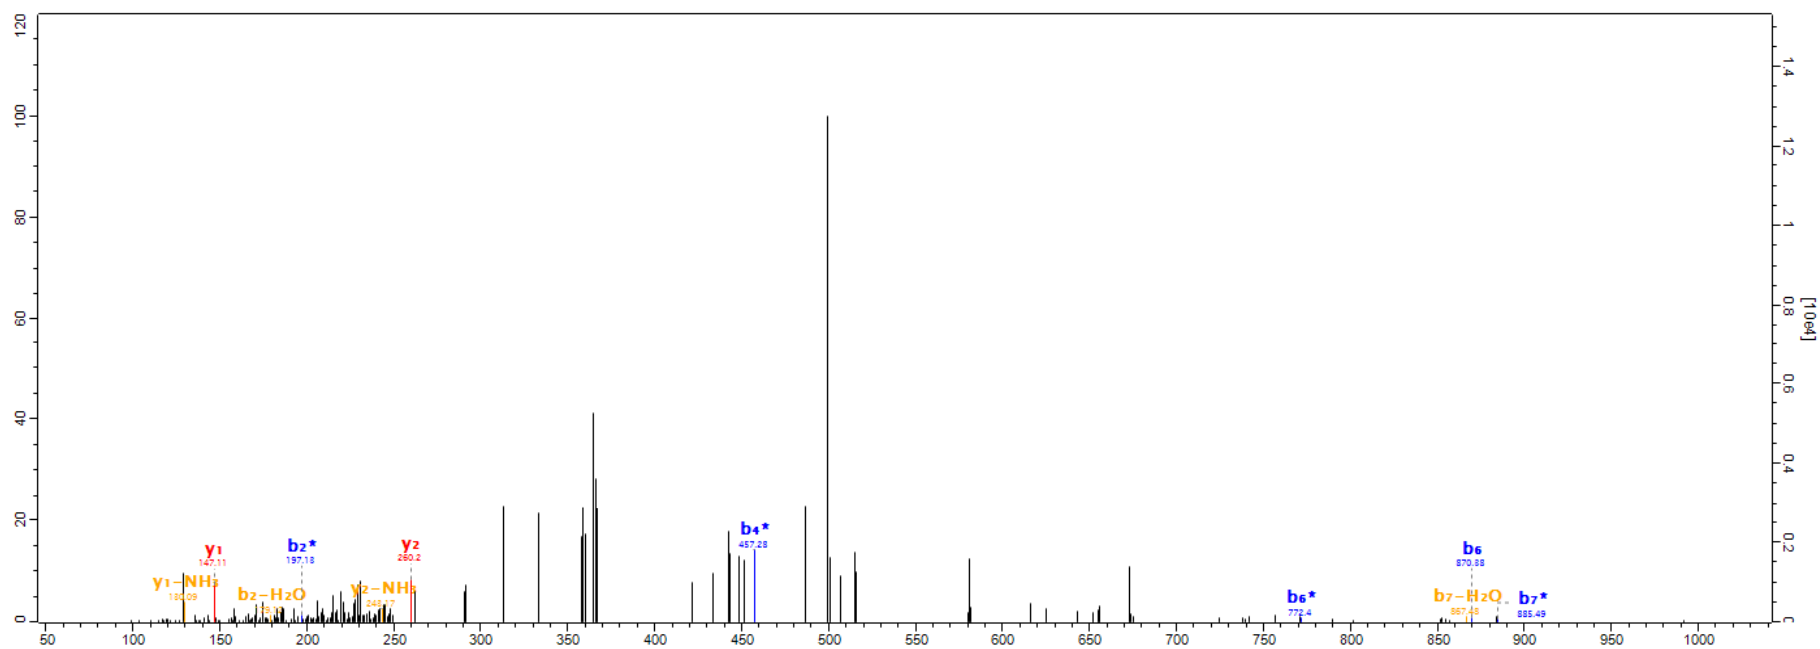

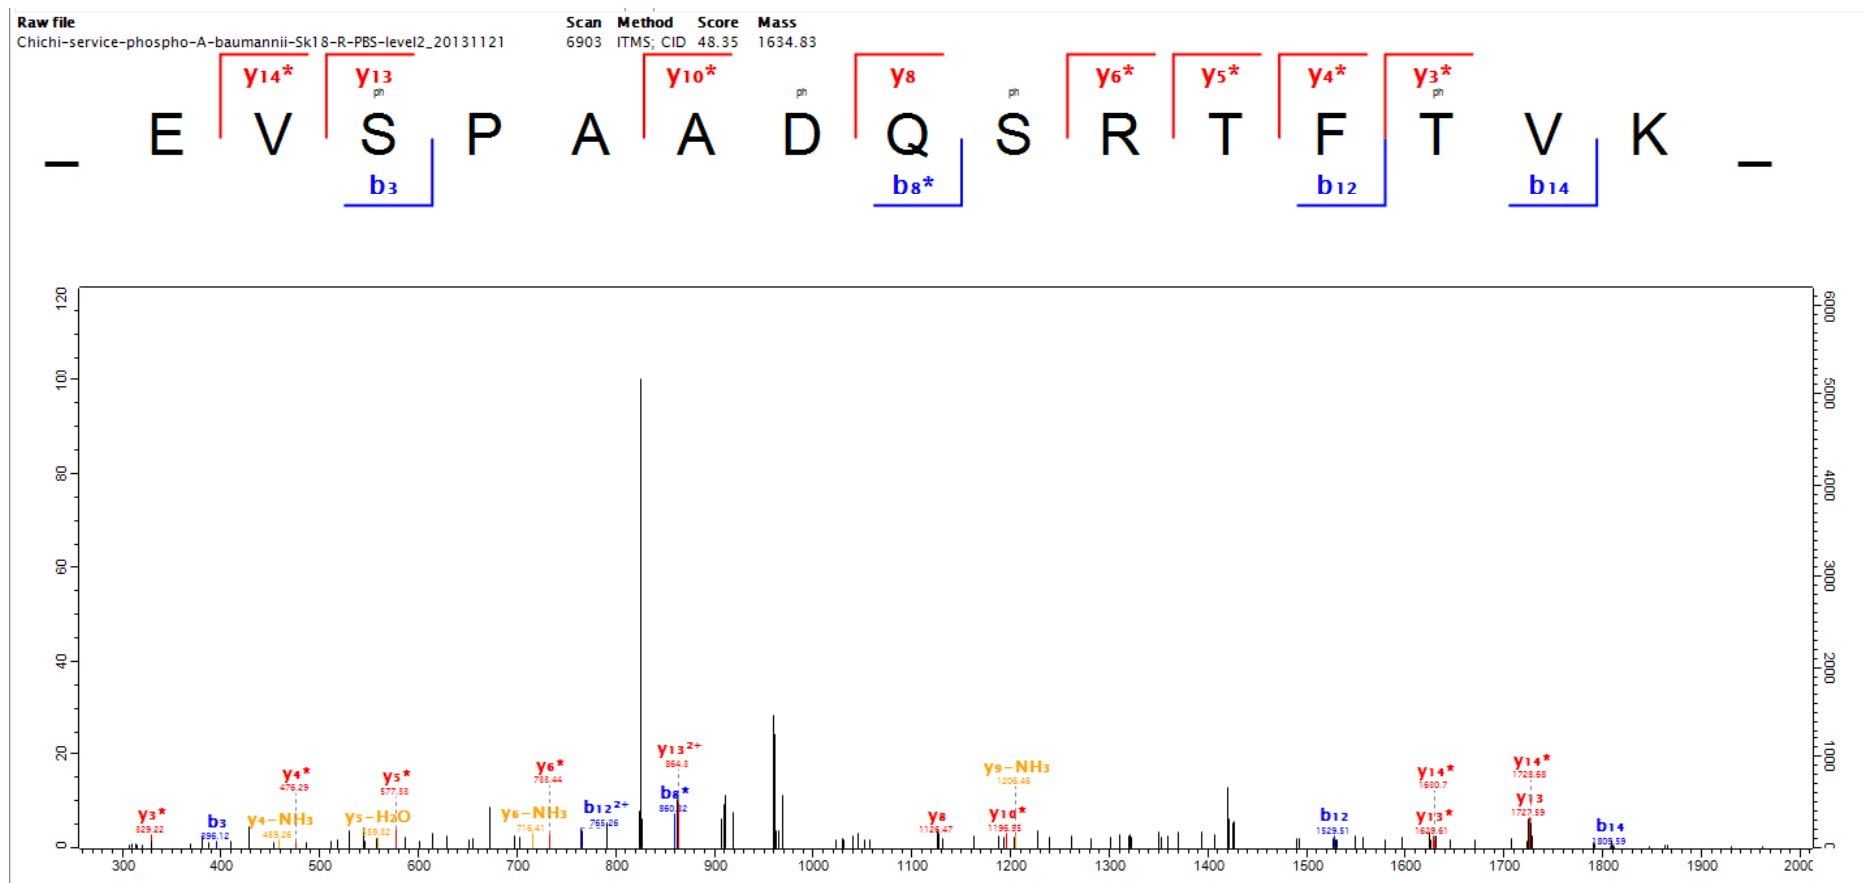

211

Raw file 20120521R301 Scan 7280 Method ITMS; CID Score 32.72 Mass 1208.6

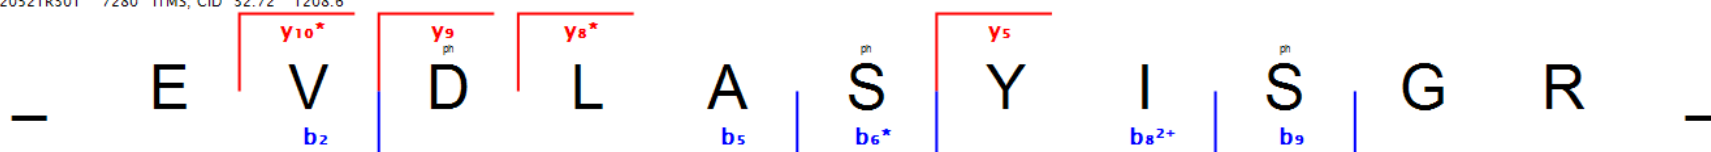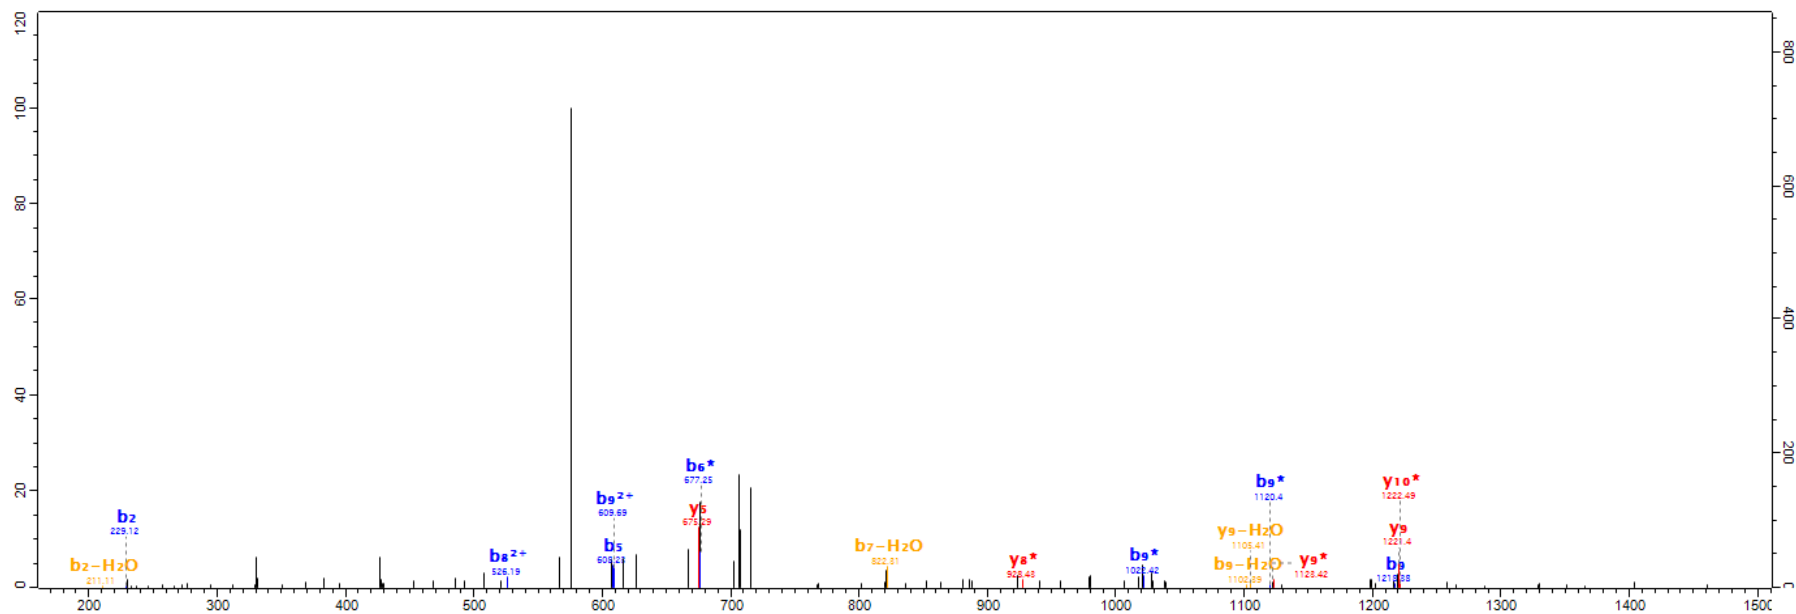

Supplement: 10.1074_M115.051052_mcp.M115.051052-3.pdf [file 10.1074_M115.051052_mcp.M115.051052-3.pdf]
